# Supplementary material for: The Study of Yin-Chen-Hao-Tang Preventing and Treating Alcoholic Fatty Liver Disease through PPAR Signaling Pathway Based on Network Pharmacology and RNA-Seq Transcriptomics
Source: Hindawi journal article supplement (doi:10.1155/2021/8917993), 2021-12-31
Supplement: f1 [file 8917993.f1.zip]

| Gene Symbol | Description                                                    | Category       | Gifts | GC Id       | Relevance score | GeneCards Link                                                                                                                    |
|-------------|----------------------------------------------------------------|----------------|-------|-------------|-----------------|-----------------------------------------------------------------------------------------------------------------------------------|
| PKD1        | Polycystin 1, Transient Receptor Potential Channel Interacting | Protein Coding | 46    | GC16M003057 | 119.5238        | <a href="https://www.genecards.org/cgi-bin/carddisp.pl?gene=PKD1">https://www.genecards.org/cgi-bin/carddisp.pl?gene=PKD1</a>     |
| IL6         | Interleukin 6                                                  | Protein Coding | 50    | GC07P022725 | 101.6283        | <a href="https://www.genecards.org/cgi-bin/carddisp.pl?gene=IL6">https://www.genecards.org/cgi-bin/carddisp.pl?gene=IL6</a>       |
| TNF         | Tumor Necrosis Factor                                          | Protein Coding | 51    | GC06P055202 | 101.4095        | <a href="https://www.genecards.org/cgi-bin/carddisp.pl?gene=TNF">https://www.genecards.org/cgi-bin/carddisp.pl?gene=TNF</a>       |
| PNPLA3      | Patatin Like Phospholipase Domain Containing 3                 | Protein Coding | 41    | GC22P043923 | 100.9991        | <a href="https://www.genecards.org/cgi-bin/carddisp.pl?gene=PNPLA3">https://www.genecards.org/cgi-bin/carddisp.pl?gene=PNPLA3</a> |
| APOE        | Apolipoprotein E                                               | Protein Coding | 51    | GC19P044906 | 99.73659        | <a href="https://www.genecards.org/cgi-bin/carddisp.pl?gene=APOE">https://www.genecards.org/cgi-bin/carddisp.pl?gene=APOE</a>     |
| TP53        | Tumor Protein P53                                              | Protein Coding | 54    | GC17M007661 | 98.49773        | <a href="https://www.genecards.org/cgi-bin/carddisp.pl?gene=TP53">https://www.genecards.org/cgi-bin/carddisp.pl?gene=TP53</a>     |
| PRMT7       | Protein Arginine Methyltransferase 7                           | Protein Coding | 45    | GC16P068363 | 94.93203        | <a href="https://www.genecards.org/cgi-bin/carddisp.pl?gene=PRMT7">https://www.genecards.org/cgi-bin/carddisp.pl?gene=PRMT7</a>   |
| PKHD1       | PKHD1 Ciliary IPT Domain Containing Fibrocystin/Polyductin     | Protein Coding | 38    | GC06M051588 | 94.50678        | <a href="https://www.genecards.org/cgi-bin/carddisp.pl?gene=PKHD1">https://www.genecards.org/cgi-bin/carddisp.pl?gene=PKHD1</a>   |
| HFE         | Homeostatic Iron Regulator                                     | Protein Coding | 44    | GC06P026087 | 93.73489        | <a href="https://www.genecards.org/cgi-bin/carddisp.pl?gene=HFE">https://www.genecards.org/cgi-bin/carddisp.pl?gene=HFE</a>       |
| PKD2        | Polycystin 2, Transient Receptor Potential Cation Channel      | Protein Coding | 47    | GC04P088007 | 90.89617        | <a href="https://www.genecards.org/cgi-bin/carddisp.pl?gene=PKD2">https://www.genecards.org/cgi-bin/carddisp.pl?gene=PKD2</a>     |
| ADH1C       | Alcohol Dehydrogenase 1C (Class I), Gamma Polypeptide          | Protein Coding | 43    | GC04M099336 | 89.8614         | <a href="https://www.genecards.org/cgi-bin/carddisp.pl?gene=ADH1C">https://www.genecards.org/cgi-bin/carddisp.pl?gene=ADH1C</a>   |
| MIR122      | MicroRNA 122                                                   | RNA Gene       | 21    | GC18P058451 | 89.85336        | <a href="https://www.genecards.org/cgi-bin/carddisp.pl?gene=MIR122">https://www.genecards.org/cgi-bin/carddisp.pl?gene=MIR122</a> |
| ALB         | Albumin                                                        | Protein Coding | 50    | GC04P073397 | 88.7054         | <a href="https://www.genecards.org/cgi-bin/carddisp.pl?gene=ALB">https://www.genecards.org/cgi-bin/carddisp.pl?gene=ALB</a>       |
| INS         | Insulin                                                        | Protein Coding | 48    | GC11M002159 | 87.77376        | <a href="https://www.genecards.org/cgi-bin/carddisp.pl?gene=INS">https://www.genecards.org/cgi-bin/carddisp.pl?gene=INS</a>       |
| ALDH2       | Aldehyde Dehydrogenase 2 Family Member                         | Protein Coding | 51    | GC12P111766 | 87.5976         | <a href="https://www.genecards.org/cgi-bin/carddisp.pl?gene=ALDH2">https://www.genecards.org/cgi-bin/carddisp.pl?gene=ALDH2</a>   |
| ADH1B       | Alcohol Dehydrogenase 1B (Class I), Beta Polypeptide           | Protein Coding | 44    | GC04M099304 | 85.45002        | <a href="https://www.genecards.org/cgi-bin/carddisp.pl?gene=ADH1B">https://www.genecards.org/cgi-bin/carddisp.pl?gene=ADH1B</a>   |

|          |                                                               |                |    |             |          |                                                                                                                                       |
|----------|---------------------------------------------------------------|----------------|----|-------------|----------|---------------------------------------------------------------------------------------------------------------------------------------|
| IL10     | Interleukin 10                                                | Protein Coding | 48 | GC01M206767 | 83.81952 | <a href="https://www.genecards.org/cgi-bin/carddisp.pl?gene=IL10">https://www.genecards.org/cgi-bin/carddisp.pl?gene=IL10</a>         |
| PPARG    | Peroxisome Proliferator Activated Receptor Gamma SEC63        | Protein Coding | 53 | GC03P012287 | 79.53107 | <a href="https://www.genecards.org/cgi-bin/carddisp.pl?gene=PPARG">https://www.genecards.org/cgi-bin/carddisp.pl?gene=PPARG</a>       |
| SEC63    | Homolog, Protein Translocation Regulator                      | Protein Coding | 44 | GC06M107867 | 79.07613 | <a href="https://www.genecards.org/cgi-bin/carddisp.pl?gene=SEC63">https://www.genecards.org/cgi-bin/carddisp.pl?gene=SEC63</a>       |
| SLC17A5  | Solute Carrier Family 17 Member 5 Hydroxyacyl-CoA             | Protein Coding | 45 | GC06M073593 | 78.82408 | <a href="https://www.genecards.org/cgi-bin/carddisp.pl?gene=SLC17A5">https://www.genecards.org/cgi-bin/carddisp.pl?gene=SLC17A5</a>   |
| HADHA    | Dehydrogenase Trifunctional Multienzyme Complex Subunit Alpha | Protein Coding | 47 | GC02M026190 | 78.51592 | <a href="https://www.genecards.org/cgi-bin/carddisp.pl?gene=HADHA">https://www.genecards.org/cgi-bin/carddisp.pl?gene=HADHA</a>       |
| GBA      | Glucosylceramidase Beta                                       | Protein Coding | 48 | GC01M155234 | 76.74422 | <a href="https://www.genecards.org/cgi-bin/carddisp.pl?gene=GBA">https://www.genecards.org/cgi-bin/carddisp.pl?gene=GBA</a>           |
| TGFB1    | Transforming Growth Factor Beta 1                             | Protein Coding | 52 | GC19M041301 | 76.22275 | <a href="https://www.genecards.org/cgi-bin/carddisp.pl?gene=TGFB1">https://www.genecards.org/cgi-bin/carddisp.pl?gene=TGFB1</a>       |
| CYP2E1   | Cytochrome P450 Family 2 Subfamily E Member 1                 | Protein Coding | 46 | GC10P133520 | 75.4827  | <a href="https://www.genecards.org/cgi-bin/carddisp.pl?gene=CYP2E1">https://www.genecards.org/cgi-bin/carddisp.pl?gene=CYP2E1</a>     |
| GPT      | Glutamic--Pyruvic Transaminase                                | Protein Coding | 43 | GC08P144502 | 73.7998  | <a href="https://www.genecards.org/cgi-bin/carddisp.pl?gene=GPT">https://www.genecards.org/cgi-bin/carddisp.pl?gene=GPT</a>           |
| LMNA     | Lamin A/C                                                     | Protein Coding | 48 | GC01P156082 | 72.939   | <a href="https://www.genecards.org/cgi-bin/carddisp.pl?gene=LMNA">https://www.genecards.org/cgi-bin/carddisp.pl?gene=LMNA</a>         |
| PRKCSH   | Protein Kinase C Substrate 80K-H NPC                          | Protein Coding | 44 | GC19P011435 | 72.54431 | <a href="https://www.genecards.org/cgi-bin/carddisp.pl?gene=PRKCSH">https://www.genecards.org/cgi-bin/carddisp.pl?gene=PRKCSH</a>     |
| NPC1     | Intracellular Cholesterol Transporter 1                       | Protein Coding | 47 | GC18M023506 | 72.08344 | <a href="https://www.genecards.org/cgi-bin/carddisp.pl?gene=NPC1">https://www.genecards.org/cgi-bin/carddisp.pl?gene=NPC1</a>         |
| MARS1    | Methionyl-TRNA Synthetase 1                                   | Protein Coding | 36 | GC12P057476 | 71.26236 | <a href="https://www.genecards.org/cgi-bin/carddisp.pl?gene=MARS1">https://www.genecards.org/cgi-bin/carddisp.pl?gene=MARS1</a>       |
| FABP1    | Fatty Acid Binding Protein 1                                  | Protein Coding | 44 | GC02M088122 | 71.22694 | <a href="https://www.genecards.org/cgi-bin/carddisp.pl?gene=FABP1">https://www.genecards.org/cgi-bin/carddisp.pl?gene=FABP1</a>       |
| MIR21    | MicroRNA 21                                                   | RNA Gene       | 24 | GC17P059841 | 70.34363 | <a href="https://www.genecards.org/cgi-bin/carddisp.pl?gene=MIR21">https://www.genecards.org/cgi-bin/carddisp.pl?gene=MIR21</a>       |
| SNCA     | Synuclein Alpha                                               | Protein Coding | 50 | GC04M089724 | 69.74733 | <a href="https://www.genecards.org/cgi-bin/carddisp.pl?gene=SNCA">https://www.genecards.org/cgi-bin/carddisp.pl?gene=SNCA</a>         |
| SERPINA1 | Serpin Family A Member 1                                      | Protein Coding | 50 | GC14M094376 | 69.68977 | <a href="https://www.genecards.org/cgi-bin/carddisp.pl?gene=SERPINA1">https://www.genecards.org/cgi-bin/carddisp.pl?gene=SERPINA1</a> |
| IL1B     | Interleukin 1 Beta                                            | Protein Coding | 49 | GC02M112829 | 68.79674 | <a href="https://www.genecards.org/cgi-bin/carddisp.pl?gene=IL1B">https://www.genecards.org/cgi-bin/carddisp.pl?gene=IL1B</a>         |

|        |                                                                        |                |    |             |          |                                                                                                                                   |
|--------|------------------------------------------------------------------------|----------------|----|-------------|----------|-----------------------------------------------------------------------------------------------------------------------------------|
| CTNNB1 | Catenin Beta 1                                                         | Protein Coding | 54 | GC03P041236 | 68.70273 | <a href="https://www.genecards.org/cgi-bin/carddisp.pl?gene=CTNNB1">https://www.genecards.org/cgi-bin/carddisp.pl?gene=CTNNB1</a> |
| APC    | APC Regulator Of WNT Signaling Pathway                                 | Protein Coding | 49 | GC05P112707 | 68.14858 | <a href="https://www.genecards.org/cgi-bin/carddisp.pl?gene=APC">https://www.genecards.org/cgi-bin/carddisp.pl?gene=APC</a>       |
| SMPD1  | Sphingomyelin Phosphodiesterase 1                                      | Protein Coding | 48 | GC11P006390 | 68.0873  | <a href="https://www.genecards.org/cgi-bin/carddisp.pl?gene=SMPD1">https://www.genecards.org/cgi-bin/carddisp.pl?gene=SMPD1</a>   |
| FAS    | Fas Cell Surface Death Receptor                                        | Protein Coding | 51 | GC10P088969 | 68.04547 | <a href="https://www.genecards.org/cgi-bin/carddisp.pl?gene=FAS">https://www.genecards.org/cgi-bin/carddisp.pl?gene=FAS</a>       |
| GAA    | Alpha Glucosidase                                                      | Protein Coding | 48 | GC17P080101 | 67.76856 | <a href="https://www.genecards.org/cgi-bin/carddisp.pl?gene=GAA">https://www.genecards.org/cgi-bin/carddisp.pl?gene=GAA</a>       |
| FASN   | Fatty Acid Synthase                                                    | Protein Coding | 50 | GC17M082078 | 66.77557 | <a href="https://www.genecards.org/cgi-bin/carddisp.pl?gene=FASN">https://www.genecards.org/cgi-bin/carddisp.pl?gene=FASN</a>     |
| ATP7B  | ATPase Copper Transporting Beta                                        | Protein Coding | 48 | GC13M051930 | 66.68053 | <a href="https://www.genecards.org/cgi-bin/carddisp.pl?gene=ATP7B">https://www.genecards.org/cgi-bin/carddisp.pl?gene=ATP7B</a>   |
| PIK3CA | Phosphatidylinositol-4,5-Bisphosphate 3-Kinase Catalytic Subunit Alpha | Protein Coding | 53 | GC03P179148 | 66.29842 | <a href="https://www.genecards.org/cgi-bin/carddisp.pl?gene=PIK3CA">https://www.genecards.org/cgi-bin/carddisp.pl?gene=PIK3CA</a> |
| TSC2   | TSC Complex Subunit 2                                                  | Protein Coding | 50 | GC16P005579 | 65.77246 | <a href="https://www.genecards.org/cgi-bin/carddisp.pl?gene=TSC2">https://www.genecards.org/cgi-bin/carddisp.pl?gene=TSC2</a>     |
| GGT1   | Gamma-Glutamyltransferase 1                                            | Protein Coding | 48 | GC22P024583 | 65.13819 | <a href="https://www.genecards.org/cgi-bin/carddisp.pl?gene=GGT1">https://www.genecards.org/cgi-bin/carddisp.pl?gene=GGT1</a>     |
| APOB   | Apolipoprotein B                                                       | Protein Coding | 46 | GC02M020956 | 64.52831 | <a href="https://www.genecards.org/cgi-bin/carddisp.pl?gene=APOB">https://www.genecards.org/cgi-bin/carddisp.pl?gene=APOB</a>     |
| APOA1  | Apolipoprotein A1                                                      | Protein Coding | 49 | GC11M116835 | 64.36289 | <a href="https://www.genecards.org/cgi-bin/carddisp.pl?gene=APOA1">https://www.genecards.org/cgi-bin/carddisp.pl?gene=APOA1</a>   |
| PPARA  | Peroxisome Proliferator Activated Receptor Alpha                       | Protein Coding | 47 | GC22P046150 | 64.11192 | <a href="https://www.genecards.org/cgi-bin/carddisp.pl?gene=PPARA">https://www.genecards.org/cgi-bin/carddisp.pl?gene=PPARA</a>   |
| GANAB  | Glucosidase II Alpha Subunit                                           | Protein Coding | 45 | GC11M069251 | 63.74379 | <a href="https://www.genecards.org/cgi-bin/carddisp.pl?gene=GANAB">https://www.genecards.org/cgi-bin/carddisp.pl?gene=GANAB</a>   |
| MIR34A | MicroRNA 34a                                                           | RNA Gene       | 22 | GC01M009151 | 63.60819 | <a href="https://www.genecards.org/cgi-bin/carddisp.pl?gene=MIR34A">https://www.genecards.org/cgi-bin/carddisp.pl?gene=MIR34A</a> |
| ABCB11 | ATP Binding Cassette Subfamily B Member 11                             | Protein Coding | 47 | GC02M168922 | 63.43503 | <a href="https://www.genecards.org/cgi-bin/carddisp.pl?gene=ABCB11">https://www.genecards.org/cgi-bin/carddisp.pl?gene=ABCB11</a> |
| CRP    | C-Reactive Protein                                                     | Protein Coding | 47 | GC01M159719 | 62.44139 | <a href="https://www.genecards.org/cgi-bin/carddisp.pl?gene=CRP">https://www.genecards.org/cgi-bin/carddisp.pl?gene=CRP</a>       |
| LRP5   | LDL Receptor Related Protein 5                                         | Protein Coding | 49 | GC11P068298 | 62.32442 | <a href="https://www.genecards.org/cgi-bin/carddisp.pl?gene=LRP5">https://www.genecards.org/cgi-bin/carddisp.pl?gene=LRP5</a>     |
| CPT2   | Carnitine Palmitoyltransferase 2                                       | Protein Coding | 50 | GC01P053196 | 61.98357 | <a href="https://www.genecards.org/cgi-bin/carddisp.pl?gene=CPT2">https://www.genecards.org/cgi-bin/carddisp.pl?gene=CPT2</a>     |
| SQSTM1 | Sequestosome 1                                                         | Protein Coding | 49 | GC05P179806 | 61.87291 | <a href="https://www.genecards.org/cgi-bin/carddisp.pl?gene=SQSTM1">https://www.genecards.org/cgi-bin/carddisp.pl?gene=SQSTM1</a> |

|        |                                                        |                |    |             |          |                                                                                                                                   |
|--------|--------------------------------------------------------|----------------|----|-------------|----------|-----------------------------------------------------------------------------------------------------------------------------------|
| APP    | Amyloid Beta Precursor Protein                         | Protein Coding | 52 | GC21M025880 | 61.60009 | <a href="https://www.genecards.org/cgi-bin/carddisp.pl?gene=APP">https://www.genecards.org/cgi-bin/carddisp.pl?gene=APP</a>       |
| F2     | Coagulation Factor II, Thrombin                        | Protein Coding | 49 | GC11P046720 | 61.5752  | <a href="https://www.genecards.org/cgi-bin/carddisp.pl?gene=F2">https://www.genecards.org/cgi-bin/carddisp.pl?gene=F2</a>         |
| ADIPOQ | Adiponectin, C1Q And Collagen Domain Containing        | Protein Coding | 45 | GC03P186842 | 61.53323 | <a href="https://www.genecards.org/cgi-bin/carddisp.pl?gene=ADIPOQ">https://www.genecards.org/cgi-bin/carddisp.pl?gene=ADIPOQ</a> |
| PSEN1  | Presenilin 1                                           | Protein Coding | 52 | GC14P073136 | 61.30258 | <a href="https://www.genecards.org/cgi-bin/carddisp.pl?gene=PSEN1">https://www.genecards.org/cgi-bin/carddisp.pl?gene=PSEN1</a>   |
| TLR4   | Toll Like Receptor 4 CF                                | Protein Coding | 51 | GC09P117704 | 61.23509 | <a href="https://www.genecards.org/cgi-bin/carddisp.pl?gene=TLR4">https://www.genecards.org/cgi-bin/carddisp.pl?gene=TLR4</a>     |
| CFTR   | Transmembrane Conductance Regulator                    | Protein Coding | 52 | GC07P117287 | 61.18417 | <a href="https://www.genecards.org/cgi-bin/carddisp.pl?gene=CFTR">https://www.genecards.org/cgi-bin/carddisp.pl?gene=CFTR</a>     |
| PTEN   | Phosphatase And Tensin Homolog                         | Protein Coding | 53 | GC10P087863 | 60.41596 | <a href="https://www.genecards.org/cgi-bin/carddisp.pl?gene=PTEN">https://www.genecards.org/cgi-bin/carddisp.pl?gene=PTEN</a>     |
| KRAS   | KRAS Proto-Oncogene, GTPase                            | Protein Coding | 52 | GC12M025204 | 60.32327 | <a href="https://www.genecards.org/cgi-bin/carddisp.pl?gene=KRAS">https://www.genecards.org/cgi-bin/carddisp.pl?gene=KRAS</a>     |
| ABCA1  | ATP Binding Cassette Subfamily A Member 1              | Protein Coding | 48 | GC09M104781 | 60.32098 | <a href="https://www.genecards.org/cgi-bin/carddisp.pl?gene=ABCA1">https://www.genecards.org/cgi-bin/carddisp.pl?gene=ABCA1</a>   |
| NOD2   | Nucleotide Binding Oligomerization Domain Containing 2 | Protein Coding | 48 | GC16P050693 | 60.2951  | <a href="https://www.genecards.org/cgi-bin/carddisp.pl?gene=NOD2">https://www.genecards.org/cgi-bin/carddisp.pl?gene=NOD2</a>     |
| KRT18  | Keratin 18                                             | Protein Coding | 49 | GC12P052948 | 60.13712 | <a href="https://www.genecards.org/cgi-bin/carddisp.pl?gene=KRT18">https://www.genecards.org/cgi-bin/carddisp.pl?gene=KRT18</a>   |
| CPT1A  | Carnitine Palmitoyltransferase 1A                      | Protein Coding | 50 | GC11M068754 | 60.10578 | <a href="https://www.genecards.org/cgi-bin/carddisp.pl?gene=CPT1A">https://www.genecards.org/cgi-bin/carddisp.pl?gene=CPT1A</a>   |
| MFN2   | Mitofusin 2                                            | Protein Coding | 48 | GC01P011980 | 59.97812 | <a href="https://www.genecards.org/cgi-bin/carddisp.pl?gene=MFN2">https://www.genecards.org/cgi-bin/carddisp.pl?gene=MFN2</a>     |
| CXCL8  | C-X-C Motif Chemokine Ligand 8                         | Protein Coding | 42 | GC04P073740 | 59.72943 | <a href="https://www.genecards.org/cgi-bin/carddisp.pl?gene=CXCL8">https://www.genecards.org/cgi-bin/carddisp.pl?gene=CXCL8</a>   |
| NAFLD1 | Fatty Liver Disease 1, Susceptibility To               | Genetic Locus  | 1  | GC22U901005 | 59.54738 | <a href="https://www.genecards.org/cgi-bin/carddisp.pl?gene=NAFLD1">https://www.genecards.org/cgi-bin/carddisp.pl?gene=NAFLD1</a> |
| LPL    | Lipoprotein Lipase                                     | Protein Coding | 50 | GC08P019901 | 59.30823 | <a href="https://www.genecards.org/cgi-bin/carddisp.pl?gene=LPL">https://www.genecards.org/cgi-bin/carddisp.pl?gene=LPL</a>       |
| AKT1   | AKT Serine/Threonine Kinase 1                          | Protein Coding | 54 | GC14M104769 | 59.26334 | <a href="https://www.genecards.org/cgi-bin/carddisp.pl?gene=AKT1">https://www.genecards.org/cgi-bin/carddisp.pl?gene=AKT1</a>     |
| G6PC1  | Glucose-6-Phosphatase Catalytic Subunit 1              | Protein Coding | 36 | GC17P044746 | 59.18401 | <a href="https://www.genecards.org/cgi-bin/carddisp.pl?gene=G6PC1">https://www.genecards.org/cgi-bin/carddisp.pl?gene=G6PC1</a>   |

|        |                                               |                |    |             |          |                                                                                                                                   |
|--------|-----------------------------------------------|----------------|----|-------------|----------|-----------------------------------------------------------------------------------------------------------------------------------|
| MIR17  | MicroRNA 17                                   | RNA Gene       | 21 | GC13P091350 | 59.14647 | <a href="https://www.genecards.org/cgi-bin/carddisp.pl?gene=MIR17">https://www.genecards.org/cgi-bin/carddisp.pl?gene=MIR17</a>   |
| NR1H4  | Nuclear Receptor Subfamily 1 Group H Member 4 | Protein Coding | 49 | GC12P100473 | 57.76836 | <a href="https://www.genecards.org/cgi-bin/carddisp.pl?gene=NR1H4">https://www.genecards.org/cgi-bin/carddisp.pl?gene=NR1H4</a>   |
| LIPA   | Lipase A, Lysosomal Acid Type                 | Protein Coding | 48 | GC10M089213 | 57.73469 | <a href="https://www.genecards.org/cgi-bin/carddisp.pl?gene=LIPA">https://www.genecards.org/cgi-bin/carddisp.pl?gene=LIPA</a>     |
| MIR155 | MicroRNA 155                                  | RNA Gene       | 19 | GC21P025560 | 57.37925 | <a href="https://www.genecards.org/cgi-bin/carddisp.pl?gene=MIR155">https://www.genecards.org/cgi-bin/carddisp.pl?gene=MIR155</a> |
| POLG   | DNA Polymerase Gamma, Catalytic Subunit       | Protein Coding | 46 | GC15M089365 | 57.32057 | <a href="https://www.genecards.org/cgi-bin/carddisp.pl?gene=POLG">https://www.genecards.org/cgi-bin/carddisp.pl?gene=POLG</a>     |
| ACE    | Angiotensin I Converting Enzyme               | Protein Coding | 50 | GC17P063477 | 57.08172 | <a href="https://www.genecards.org/cgi-bin/carddisp.pl?gene=ACE">https://www.genecards.org/cgi-bin/carddisp.pl?gene=ACE</a>       |
| MIR10B | MicroRNA 10b                                  | RNA Gene       | 21 | GC02P176150 | 56.82254 | <a href="https://www.genecards.org/cgi-bin/carddisp.pl?gene=MIR10B">https://www.genecards.org/cgi-bin/carddisp.pl?gene=MIR10B</a> |
| LEP    | Leptin                                        | Protein Coding | 48 | GC07P128241 | 56.78732 | <a href="https://www.genecards.org/cgi-bin/carddisp.pl?gene=LEP">https://www.genecards.org/cgi-bin/carddisp.pl?gene=LEP</a>       |
| HNF4A  | Hepatocyte Nuclear Factor 4 Alpha             | Protein Coding | 51 | GC20P044355 | 56.78619 | <a href="https://www.genecards.org/cgi-bin/carddisp.pl?gene=HNF4A">https://www.genecards.org/cgi-bin/carddisp.pl?gene=HNF4A</a>   |
| MPZ    | Myelin Protein Zero                           | Protein Coding | 44 | GC01M161304 | 56.69935 | <a href="https://www.genecards.org/cgi-bin/carddisp.pl?gene=MPZ">https://www.genecards.org/cgi-bin/carddisp.pl?gene=MPZ</a>       |
| VWF    | Von Willebrand Factor                         | Protein Coding | 49 | GC12M005917 | 56.60173 | <a href="https://www.genecards.org/cgi-bin/carddisp.pl?gene=VWF">https://www.genecards.org/cgi-bin/carddisp.pl?gene=VWF</a>       |
| CTLA4  | Cytotoxic T-Lymphocyte Associated Protein 4   | Protein Coding | 46 | GC02P203867 | 56.58133 | <a href="https://www.genecards.org/cgi-bin/carddisp.pl?gene=CTLA4">https://www.genecards.org/cgi-bin/carddisp.pl?gene=CTLA4</a>   |
| LRRK2  | Leucine Rich Repeat Kinase 2                  | Protein Coding | 50 | GC12P040196 | 55.73726 | <a href="https://www.genecards.org/cgi-bin/carddisp.pl?gene=LRRK2">https://www.genecards.org/cgi-bin/carddisp.pl?gene=LRRK2</a>   |
| PRKN   | Parkin RBR E3 Ubiquitin Protein Ligase Signal | Protein Coding | 40 | GC06M161348 | 55.72185 | <a href="https://www.genecards.org/cgi-bin/carddisp.pl?gene=PRKN">https://www.genecards.org/cgi-bin/carddisp.pl?gene=PRKN</a>     |
| STAT3  | Transducer And Activator Of Transcription 3   | Protein Coding | 53 | GC17M042313 | 55.53656 | <a href="https://www.genecards.org/cgi-bin/carddisp.pl?gene=STAT3">https://www.genecards.org/cgi-bin/carddisp.pl?gene=STAT3</a>   |
| MTHFR  | Methylenetetrahydrofolate Reductase           | Protein Coding | 49 | GC01M011785 | 55.03107 | <a href="https://www.genecards.org/cgi-bin/carddisp.pl?gene=MTHFR">https://www.genecards.org/cgi-bin/carddisp.pl?gene=MTHFR</a>   |
| IFNG   | Interferon Gamma Phosphorylase Kinase         | Protein Coding | 48 | GC12M068154 | 54.84436 | <a href="https://www.genecards.org/cgi-bin/carddisp.pl?gene=IFNG">https://www.genecards.org/cgi-bin/carddisp.pl?gene=IFNG</a>     |
| PHKA2  | Regulatory Subunit Alpha 2                    | Protein Coding | 46 | GC0XM018892 | 54.79215 | <a href="https://www.genecards.org/cgi-bin/carddisp.pl?gene=PHKA2">https://www.genecards.org/cgi-bin/carddisp.pl?gene=PHKA2</a>   |

|          |                                                                              |                |    |             |          |                                                                                                                                       |
|----------|------------------------------------------------------------------------------|----------------|----|-------------|----------|---------------------------------------------------------------------------------------------------------------------------------------|
| ACADM    | Acyl-CoA Dehydrogenase Medium Chain                                          | Protein Coding | 47 | GC01P075724 | 54.48516 | <a href="https://www.genecards.org/cgi-bin/carddisp.pl?gene=ACADM">https://www.genecards.org/cgi-bin/carddisp.pl?gene=ACADM</a>       |
| HADHB    | Hydroxyacyl-CoA Dehydrogenase Trifunctional Multienzyme Complex Subunit Beta | Protein Coding | 48 | GC02P026243 | 54.44437 | <a href="https://www.genecards.org/cgi-bin/carddisp.pl?gene=HADHB">https://www.genecards.org/cgi-bin/carddisp.pl?gene=HADHB</a>       |
| PSAP     | Prosaposin                                                                   | Protein Coding | 47 | GC10M071816 | 54.37947 | <a href="https://www.genecards.org/cgi-bin/carddisp.pl?gene=PSAP">https://www.genecards.org/cgi-bin/carddisp.pl?gene=PSAP</a>         |
| RET      | Ret Proto-Oncogene                                                           | Protein Coding | 54 | GC10P043081 | 54.16558 | <a href="https://www.genecards.org/cgi-bin/carddisp.pl?gene=RET">https://www.genecards.org/cgi-bin/carddisp.pl?gene=RET</a>           |
| CD36     | CD36 Molecule                                                                | Protein Coding | 49 | GC07P080369 | 54.08582 | <a href="https://www.genecards.org/cgi-bin/carddisp.pl?gene=CD36">https://www.genecards.org/cgi-bin/carddisp.pl?gene=CD36</a>         |
| HLA-DRB1 | Major Histocompatibility Complex, Class II, DR Beta 1                        | Protein Coding | 48 | GC06M032578 | 54.01691 | <a href="https://www.genecards.org/cgi-bin/carddisp.pl?gene=HLA-DRB1">https://www.genecards.org/cgi-bin/carddisp.pl?gene=HLA-DRB1</a> |
| AGL      | Amylo-Alpha-1, 6-Glucosidase, 4-Alpha-Glucanotransferase                     | Protein Coding | 45 | GC01P099850 | 53.58754 | <a href="https://www.genecards.org/cgi-bin/carddisp.pl?gene=AGL">https://www.genecards.org/cgi-bin/carddisp.pl?gene=AGL</a>           |
| TERT     | Telomerase Reverse Transcriptase                                             | Protein Coding | 52 | GC05M001253 | 53.33697 | <a href="https://www.genecards.org/cgi-bin/carddisp.pl?gene=TERT">https://www.genecards.org/cgi-bin/carddisp.pl?gene=TERT</a>         |
| VCP      | Valosin Containing Protein                                                   | Protein Coding | 50 | GC09M035056 | 53.28416 | <a href="https://www.genecards.org/cgi-bin/carddisp.pl?gene=VCP">https://www.genecards.org/cgi-bin/carddisp.pl?gene=VCP</a>           |
| INSR     | Insulin Receptor                                                             | Protein Coding | 54 | GC19M007112 | 53.28331 | <a href="https://www.genecards.org/cgi-bin/carddisp.pl?gene=INSR">https://www.genecards.org/cgi-bin/carddisp.pl?gene=INSR</a>         |
| CASP8    | Caspase 8                                                                    | Protein Coding | 52 | GC02P201233 | 53.08566 | <a href="https://www.genecards.org/cgi-bin/carddisp.pl?gene=CASP8">https://www.genecards.org/cgi-bin/carddisp.pl?gene=CASP8</a>       |
| MIR146A  | MicroRNA 146a                                                                | RNA Gene       | 22 | GC05P160485 | 53.00844 | <a href="https://www.genecards.org/cgi-bin/carddisp.pl?gene=MIR146A">https://www.genecards.org/cgi-bin/carddisp.pl?gene=MIR146A</a>   |
| NOS3     | Nitric Oxide Synthase 3                                                      | Protein Coding | 52 | GC07P150990 | 52.36965 | <a href="https://www.genecards.org/cgi-bin/carddisp.pl?gene=NOS3">https://www.genecards.org/cgi-bin/carddisp.pl?gene=NOS3</a>         |
| PRNP     | Prion Protein                                                                | Protein Coding | 47 | GC20P004686 | 52.19698 | <a href="https://www.genecards.org/cgi-bin/carddisp.pl?gene=PRNP">https://www.genecards.org/cgi-bin/carddisp.pl?gene=PRNP</a>         |
| PYGL     | Glycogen Phosphorylase L                                                     | Protein Coding | 49 | GC14M050857 | 52.19163 | <a href="https://www.genecards.org/cgi-bin/carddisp.pl?gene=PYGL">https://www.genecards.org/cgi-bin/carddisp.pl?gene=PYGL</a>         |
| MTTP     | Microsomal Triglyceride Transfer Protein                                     | Protein Coding | 45 | GC04P099563 | 52.15165 | <a href="https://www.genecards.org/cgi-bin/carddisp.pl?gene=MTTP">https://www.genecards.org/cgi-bin/carddisp.pl?gene=MTTP</a>         |
| FAR1     | Fatty Acyl-CoA Reductase 1                                                   | Protein Coding | 43 | GC11P013668 | 51.87154 | <a href="https://www.genecards.org/cgi-bin/carddisp.pl?gene=FAR1">https://www.genecards.org/cgi-bin/carddisp.pl?gene=FAR1</a>         |

|                  |                                                                                 |                      |    |                 |          |                                                                                                                                               |
|------------------|---------------------------------------------------------------------------------|----------------------|----|-----------------|----------|-----------------------------------------------------------------------------------------------------------------------------------------------|
| SREBF1           | Sterol<br>Regulatory<br>Element<br>Binding<br>Transcription<br>Factor 1         | Protein<br>Coding    | 46 | GC17M017<br>810 | 51.58896 | <a href="https://www.genecards.org/cgi-bin/carddisp.pl?gene=SREBF1">https://www.genecards.org/cgi-bin/carddisp.pl?gene=SREBF1</a>             |
| EGF              | Epidermal<br>Growth Factor                                                      | Protein<br>Coding    | 51 | GC04P1099<br>12 | 51.46554 | <a href="https://www.genecards.org/cgi-bin/carddisp.pl?gene=EGF">https://www.genecards.org/cgi-bin/carddisp.pl?gene=EGF</a>                   |
| TSC1             | TSC Complex<br>Subunit 1                                                        | Protein<br>Coding    | 48 | GC09M132<br>891 | 51.2425  | <a href="https://www.genecards.org/cgi-bin/carddisp.pl?gene=TSC1">https://www.genecards.org/cgi-bin/carddisp.pl?gene=TSC1</a>                 |
| EGFR             | Epidermal<br>Growth Factor<br>Receptor                                          | Protein<br>Coding    | 54 | GC07P0550<br>19 | 51.1895  | <a href="https://www.genecards.org/cgi-bin/carddisp.pl?gene=EGFR">https://www.genecards.org/cgi-bin/carddisp.pl?gene=EGFR</a>                 |
| HNF1A            | HNF1<br>Homeobox A                                                              | Protein<br>Coding    | 46 | GC12P1209<br>78 | 50.89312 | <a href="https://www.genecards.org/cgi-bin/carddisp.pl?gene=HNF1A">https://www.genecards.org/cgi-bin/carddisp.pl?gene=HNF1A</a>               |
| ACOX1            | Acyl-CoA<br>Oxidase 1                                                           | Protein<br>Coding    | 47 | GC17M075<br>941 | 50.42818 | <a href="https://www.genecards.org/cgi-bin/carddisp.pl?gene=ACOX1">https://www.genecards.org/cgi-bin/carddisp.pl?gene=ACOX1</a>               |
| GBE1             | 1,4-Alpha-<br>Glucan<br>Branching<br>Enzyme 1                                   | Protein<br>Coding    | 45 | GC03M081<br>489 | 50.25403 | <a href="https://www.genecards.org/cgi-bin/carddisp.pl?gene=GBE1">https://www.genecards.org/cgi-bin/carddisp.pl?gene=GBE1</a>                 |
| TRPV4            | Transient<br>Receptor<br>Potential<br>Cation Channel<br>Subfamily V<br>Member 4 | Protein<br>Coding    | 50 | GC12M109<br>783 | 50.16294 | <a href="https://www.genecards.org/cgi-bin/carddisp.pl?gene=TRPV4">https://www.genecards.org/cgi-bin/carddisp.pl?gene=TRPV4</a>               |
| DRD2             | Dopamine<br>Receptor D2                                                         | Protein<br>Coding    | 51 | GC11M113<br>409 | 50.1232  | <a href="https://www.genecards.org/cgi-bin/carddisp.pl?gene=DRD2">https://www.genecards.org/cgi-bin/carddisp.pl?gene=DRD2</a>                 |
| MAPT             | Microtubule<br>Associated<br>Protein Tau                                        | Protein<br>Coding    | 51 | GC17P0458<br>94 | 49.91683 | <a href="https://www.genecards.org/cgi-bin/carddisp.pl?gene=MAPT">https://www.genecards.org/cgi-bin/carddisp.pl?gene=MAPT</a>                 |
| FABP4            | Fatty Acid<br>Binding Protein<br>4                                              | Protein<br>Coding    | 45 | GC08M081<br>478 | 49.90357 | <a href="https://www.genecards.org/cgi-bin/carddisp.pl?gene=FABP4">https://www.genecards.org/cgi-bin/carddisp.pl?gene=FABP4</a>               |
| TTR              | Transthyretin                                                                   | Protein<br>Coding    | 50 | GC18P0315<br>57 | 49.79599 | <a href="https://www.genecards.org/cgi-bin/carddisp.pl?gene=TTR">https://www.genecards.org/cgi-bin/carddisp.pl?gene=TTR</a>                   |
| AFP              | Alpha<br>Fetoprotein                                                            | Protein<br>Coding    | 46 | GC04P0734<br>31 | 49.74606 | <a href="https://www.genecards.org/cgi-bin/carddisp.pl?gene=AFP">https://www.genecards.org/cgi-bin/carddisp.pl?gene=AFP</a>                   |
| AKR1A1           | Aldo-Keto<br>Reductase<br>Family 1<br>Member A1                                 | Protein<br>Coding    | 45 | GC01P0455<br>50 | 49.6741  | <a href="https://www.genecards.org/cgi-bin/carddisp.pl?gene=AKR1A1">https://www.genecards.org/cgi-bin/carddisp.pl?gene=AKR1A1</a>             |
| GJB1             | Gap Junction<br>Protein Beta 1                                                  | Protein<br>Coding    | 48 | GC0XP0712<br>12 | 49.54929 | <a href="https://www.genecards.org/cgi-bin/carddisp.pl?gene=GJB1">https://www.genecards.org/cgi-bin/carddisp.pl?gene=GJB1</a>                 |
| FABP2            | Fatty Acid<br>Binding Protein<br>2                                              | Protein<br>Coding    | 43 | GC04M119<br>317 | 49.53653 | <a href="https://www.genecards.org/cgi-bin/carddisp.pl?gene=FABP2">https://www.genecards.org/cgi-bin/carddisp.pl?gene=FABP2</a>               |
| CYP3A4           | Cytochrome<br>P450 Family 3<br>Subfamily A<br>Member 4                          | Protein<br>Coding    | 51 | GC07M099<br>759 | 49.52491 | <a href="https://www.genecards.org/cgi-bin/carddisp.pl?gene=CYP3A4">https://www.genecards.org/cgi-bin/carddisp.pl?gene=CYP3A4</a>             |
| LOC10662<br>7981 | GBA<br>Recombination<br>Region                                                  | Biological<br>Region | 2  | GC01P1552<br>33 | 49.46788 | <a href="https://www.genecards.org/cgi-bin/carddisp.pl?gene=LOC106627981">https://www.genecards.org/cgi-bin/carddisp.pl?gene=LOC106627981</a> |
| SOD1             | Superoxide<br>Dismutase 1                                                       | Protein<br>Coding    | 52 | GC21P0316<br>59 | 49.46487 | <a href="https://www.genecards.org/cgi-bin/carddisp.pl?gene=SOD1">https://www.genecards.org/cgi-bin/carddisp.pl?gene=SOD1</a>                 |

|          |                                                          |                |    |             |          |                                                                                                                                       |
|----------|----------------------------------------------------------|----------------|----|-------------|----------|---------------------------------------------------------------------------------------------------------------------------------------|
| IGF1     | Insulin Like Growth Factor 1                             | Protein Coding | 50 | GC12M102395 | 49.23305 | <a href="https://www.genecards.org/cgi-bin/carddisp.pl?gene=IGF1">https://www.genecards.org/cgi-bin/carddisp.pl?gene=IGF1</a>         |
| NR1H3    | Nuclear Receptor Subfamily 1 Group H Member 3            | Protein Coding | 48 | GC11P047248 | 49.15171 | <a href="https://www.genecards.org/cgi-bin/carddisp.pl?gene=NR1H3">https://www.genecards.org/cgi-bin/carddisp.pl?gene=NR1H3</a>       |
| SERPINE1 | Serpin Family E Member 1                                 | Protein Coding | 51 | GC07P101127 | 48.93843 | <a href="https://www.genecards.org/cgi-bin/carddisp.pl?gene=SERPINE1">https://www.genecards.org/cgi-bin/carddisp.pl?gene=SERPINE1</a> |
| ABCA4    | ATP Binding Cassette Subfamily A Member 4                | Protein Coding | 45 | GC01M093992 | 48.93377 | <a href="https://www.genecards.org/cgi-bin/carddisp.pl?gene=ABCA4">https://www.genecards.org/cgi-bin/carddisp.pl?gene=ABCA4</a>       |
| RBP4     | Retinol Binding Protein 4                                | Protein Coding | 45 | GC10M093591 | 48.77829 | <a href="https://www.genecards.org/cgi-bin/carddisp.pl?gene=RBP4">https://www.genecards.org/cgi-bin/carddisp.pl?gene=RBP4</a>         |
| CYBB     | Cytochrome B-245 Beta Chain                              | Protein Coding | 47 | GC0XP037780 | 48.75913 | <a href="https://www.genecards.org/cgi-bin/carddisp.pl?gene=CYBB">https://www.genecards.org/cgi-bin/carddisp.pl?gene=CYBB</a>         |
| KRT8     | Keratin 8                                                | Protein Coding | 48 | GC12M052897 | 48.65049 | <a href="https://www.genecards.org/cgi-bin/carddisp.pl?gene=KRT8">https://www.genecards.org/cgi-bin/carddisp.pl?gene=KRT8</a>         |
| ABCB4    | ATP Binding Cassette Subfamily B Member 4                | Protein Coding | 47 | GC07M087401 | 48.33384 | <a href="https://www.genecards.org/cgi-bin/carddisp.pl?gene=ABCB4">https://www.genecards.org/cgi-bin/carddisp.pl?gene=ABCB4</a>       |
| GLA      | Galactosidase Alpha                                      | Protein Coding | 49 | GC0XM101393 | 48.26838 | <a href="https://www.genecards.org/cgi-bin/carddisp.pl?gene=GLA">https://www.genecards.org/cgi-bin/carddisp.pl?gene=GLA</a>           |
| TLR2     | Toll Like Receptor 2                                     | Protein Coding | 52 | GC04P153684 | 48.07245 | <a href="https://www.genecards.org/cgi-bin/carddisp.pl?gene=TLR2">https://www.genecards.org/cgi-bin/carddisp.pl?gene=TLR2</a>         |
| BRAF     | B-Raf Proto-Oncogene, Serine/Threonine Kinase            | Protein Coding | 54 | GC07M140717 | 47.7293  | <a href="https://www.genecards.org/cgi-bin/carddisp.pl?gene=BRAF">https://www.genecards.org/cgi-bin/carddisp.pl?gene=BRAF</a>         |
| ELOVL4   | ELOVL Fatty Acid Elongase 4                              | Protein Coding | 46 | GC06M079914 | 47.67517 | <a href="https://www.genecards.org/cgi-bin/carddisp.pl?gene=ELOVL4">https://www.genecards.org/cgi-bin/carddisp.pl?gene=ELOVL4</a>     |
| GDAP1    | Ganglioside Induced Differentiation Associated Protein 1 | Protein Coding | 43 | GC08P074315 | 47.34433 | <a href="https://www.genecards.org/cgi-bin/carddisp.pl?gene=GDAP1">https://www.genecards.org/cgi-bin/carddisp.pl?gene=GDAP1</a>       |
| PON1     | Paraoxonase 1                                            | Protein Coding | 46 | GC07M095297 | 47.30381 | <a href="https://www.genecards.org/cgi-bin/carddisp.pl?gene=PON1">https://www.genecards.org/cgi-bin/carddisp.pl?gene=PON1</a>         |
| TRMU     | TRNA Mitochondrial 2-Thiouridylase                       | Protein Coding | 40 | GC22P046330 | 47.26027 | <a href="https://www.genecards.org/cgi-bin/carddisp.pl?gene=TRMU">https://www.genecards.org/cgi-bin/carddisp.pl?gene=TRMU</a>         |
| BDNF     | Brain Derived Neurotrophic Factor                        | Protein Coding | 48 | GC11M027654 | 47.24964 | <a href="https://www.genecards.org/cgi-bin/carddisp.pl?gene=BDNF">https://www.genecards.org/cgi-bin/carddisp.pl?gene=BDNF</a>         |
| SLC25A13 | Solute Carrier Family 25 Member 13                       | Protein Coding | 47 | GC07M096120 | 47.23321 | <a href="https://www.genecards.org/cgi-bin/carddisp.pl?gene=SLC25A13">https://www.genecards.org/cgi-bin/carddisp.pl?gene=SLC25A13</a> |
| GYS2     | Glycogen Synthase 2                                      | Protein Coding | 44 | GC12M021531 | 46.79419 | <a href="https://www.genecards.org/cgi-bin/carddisp.pl?gene=GYS2">https://www.genecards.org/cgi-bin/carddisp.pl?gene=GYS2</a>         |



|          |                                                       |                |    |             |          |                                                                                                                                       |
|----------|-------------------------------------------------------|----------------|----|-------------|----------|---------------------------------------------------------------------------------------------------------------------------------------|
| CCL2     | C-C Motif Chemokine Ligand 2                          | Protein Coding | 49 | GC17P034255 | 46.73888 | <a href="https://www.genecards.org/cgi-bin/carddisp.pl?gene=CCL2">https://www.genecards.org/cgi-bin/carddisp.pl?gene=CCL2</a>         |
| HLA-DQB1 | Major Histocompatibility Complex, Class II, DQ Beta 1 | Protein Coding | 43 | GC06M046939 | 46.662   | <a href="https://www.genecards.org/cgi-bin/carddisp.pl?gene=HLA-DQB1">https://www.genecards.org/cgi-bin/carddisp.pl?gene=HLA-DQB1</a> |
| CASP3    | Caspase 3                                             | Protein Coding | 51 | GC04M184627 | 46.52601 | <a href="https://www.genecards.org/cgi-bin/carddisp.pl?gene=CASP3">https://www.genecards.org/cgi-bin/carddisp.pl?gene=CASP3</a>       |
| TF       | Transferrin                                           | Protein Coding | 50 | GC03P133666 | 46.46587 | <a href="https://www.genecards.org/cgi-bin/carddisp.pl?gene=TF">https://www.genecards.org/cgi-bin/carddisp.pl?gene=TF</a>             |
| NEFL     | Neurofilament Light Chain                             | Protein Coding | 47 | GC08M024950 | 46.25078 | <a href="https://www.genecards.org/cgi-bin/carddisp.pl?gene=NEFL">https://www.genecards.org/cgi-bin/carddisp.pl?gene=NEFL</a>         |
| IL1A     | Interleukin 1 Alpha                                   | Protein Coding | 44 | GC02M112773 | 46.23853 | <a href="https://www.genecards.org/cgi-bin/carddisp.pl?gene=IL1A">https://www.genecards.org/cgi-bin/carddisp.pl?gene=IL1A</a>         |
| ABCD1    | ATP Binding Cassette Subfamily D Member 1             | Protein Coding | 47 | GC0XP153724 | 46.18417 | <a href="https://www.genecards.org/cgi-bin/carddisp.pl?gene=ABCD1">https://www.genecards.org/cgi-bin/carddisp.pl?gene=ABCD1</a>       |
| RYR1     | Ryanodine Receptor 1                                  | Protein Coding | 47 | GC19P040452 | 46.17769 | <a href="https://www.genecards.org/cgi-bin/carddisp.pl?gene=RYR1">https://www.genecards.org/cgi-bin/carddisp.pl?gene=RYR1</a>         |
| HMOX1    | Heme Oxygenase 1                                      | Protein Coding | 53 | GC22P035380 | 46.1692  | <a href="https://www.genecards.org/cgi-bin/carddisp.pl?gene=HMOX1">https://www.genecards.org/cgi-bin/carddisp.pl?gene=HMOX1</a>       |
| MIR29A   | MicroRNA 29a                                          | RNA Gene       | 22 | GC07M130876 | 46.14713 | <a href="https://www.genecards.org/cgi-bin/carddisp.pl?gene=MIR29A">https://www.genecards.org/cgi-bin/carddisp.pl?gene=MIR29A</a>     |
| MET      | MET Proto-Oncogene, Receptor Tyrosine Kinase          | Protein Coding | 54 | GC07P116672 | 46.14655 | <a href="https://www.genecards.org/cgi-bin/carddisp.pl?gene=MET">https://www.genecards.org/cgi-bin/carddisp.pl?gene=MET</a>           |
| HNF1B    | HNF1 Homeobox B                                       | Protein Coding | 44 | GC17M037686 | 45.97813 | <a href="https://www.genecards.org/cgi-bin/carddisp.pl?gene=HNF1B">https://www.genecards.org/cgi-bin/carddisp.pl?gene=HNF1B</a>       |
| NBAS     | NBAS Subunit Of NRZ Tethering Complex                 | Protein Coding | 40 | GC02M014998 | 45.46504 | <a href="https://www.genecards.org/cgi-bin/carddisp.pl?gene=NBAS">https://www.genecards.org/cgi-bin/carddisp.pl?gene=NBAS</a>         |
| MIR15A   | MicroRNA 15a                                          | RNA Gene       | 16 | GC13M050049 | 45.45919 | <a href="https://www.genecards.org/cgi-bin/carddisp.pl?gene=MIR15A">https://www.genecards.org/cgi-bin/carddisp.pl?gene=MIR15A</a>     |
| MIR27A   | MicroRNA 27a                                          | RNA Gene       | 22 | GC19M014109 | 45.27167 | <a href="https://www.genecards.org/cgi-bin/carddisp.pl?gene=MIR27A">https://www.genecards.org/cgi-bin/carddisp.pl?gene=MIR27A</a>     |
| PEX6     | Peroxisomal Biogenesis Factor 6                       | Protein Coding | 43 | GC06M042963 | 45.21988 | <a href="https://www.genecards.org/cgi-bin/carddisp.pl?gene=PEX6">https://www.genecards.org/cgi-bin/carddisp.pl?gene=PEX6</a>         |
| NPC2     | NPC Intracellular Cholesterol Transporter 2           | Protein Coding | 42 | GC14M074476 | 45.16733 | <a href="https://www.genecards.org/cgi-bin/carddisp.pl?gene=NPC2">https://www.genecards.org/cgi-bin/carddisp.pl?gene=NPC2</a>         |
| MPO      | Myeloperoxidase                                       | Protein Coding | 51 | GC17M058269 | 45.08788 | <a href="https://www.genecards.org/cgi-bin/carddisp.pl?gene=MPO">https://www.genecards.org/cgi-bin/carddisp.pl?gene=MPO</a>           |
| LDLR     | Low Density Lipoprotein Receptor                      | Protein Coding | 50 | GC19P011091 | 45.07767 | <a href="https://www.genecards.org/cgi-bin/carddisp.pl?gene=LDLR">https://www.genecards.org/cgi-bin/carddisp.pl?gene=LDLR</a>         |
| ADH4     | Alcohol Dehydrogenase 4 (Class II), Pi Polypeptide    | Protein Coding | 45 | GC04M099123 | 44.93248 | <a href="https://www.genecards.org/cgi-bin/carddisp.pl?gene=ADH4">https://www.genecards.org/cgi-bin/carddisp.pl?gene=ADH4</a>         |

|          |                                                |                |    |             |          |                                                                                                                                       |
|----------|------------------------------------------------|----------------|----|-------------|----------|---------------------------------------------------------------------------------------------------------------------------------------|
| IRS1     | Insulin Receptor Substrate 1                   | Protein Coding | 48 | GC02M226731 | 44.90195 | <a href="https://www.genecards.org/cgi-bin/carddisp.pl?gene=IRS1">https://www.genecards.org/cgi-bin/carddisp.pl?gene=IRS1</a>         |
| VEGFA    | Vascular Endothelial Growth Factor A           | Protein Coding | 49 | GC06P043770 | 44.88901 | <a href="https://www.genecards.org/cgi-bin/carddisp.pl?gene=VEGFA">https://www.genecards.org/cgi-bin/carddisp.pl?gene=VEGFA</a>       |
| HBB      | Hemoglobin Subunit Beta SH3 Domain             | Protein Coding | 46 | GC11M005434 | 44.88221 | <a href="https://www.genecards.org/cgi-bin/carddisp.pl?gene=HBB">https://www.genecards.org/cgi-bin/carddisp.pl?gene=HBB</a>           |
| SH3TC2   | And Tetratricopeptide Repeats 2                | Protein Coding | 38 | GC05M148923 | 44.60126 | <a href="https://www.genecards.org/cgi-bin/carddisp.pl?gene=SH3TC2">https://www.genecards.org/cgi-bin/carddisp.pl?gene=SH3TC2</a>     |
| JAK2     | Janus Kinase 2                                 | Protein Coding | 54 | GC09P004985 | 44.59028 | <a href="https://www.genecards.org/cgi-bin/carddisp.pl?gene=JAK2">https://www.genecards.org/cgi-bin/carddisp.pl?gene=JAK2</a>         |
| GFAP     | Glial Fibrillary Acidic Protein                | Protein Coding | 48 | GC17M044905 | 44.53488 | <a href="https://www.genecards.org/cgi-bin/carddisp.pl?gene=GFAP">https://www.genecards.org/cgi-bin/carddisp.pl?gene=GFAP</a>         |
| BRCA2    | BRCA2 DNA Repair Associated                    | Protein Coding | 50 | GC13P032315 | 44.44099 | <a href="https://www.genecards.org/cgi-bin/carddisp.pl?gene=BRCA2">https://www.genecards.org/cgi-bin/carddisp.pl?gene=BRCA2</a>       |
| FBN1     | Fibrillin 1                                    | Protein Coding | 47 | GC15M048408 | 44.03257 | <a href="https://www.genecards.org/cgi-bin/carddisp.pl?gene=FBN1">https://www.genecards.org/cgi-bin/carddisp.pl?gene=FBN1</a>         |
| LEPR     | Leptin Receptor                                | Protein Coding | 50 | GC01P065421 | 43.93019 | <a href="https://www.genecards.org/cgi-bin/carddisp.pl?gene=LEPR">https://www.genecards.org/cgi-bin/carddisp.pl?gene=LEPR</a>         |
| CEP290   | Centrosomal Protein 290                        | Protein Coding | 41 | GC12M088049 | 43.91979 | <a href="https://www.genecards.org/cgi-bin/carddisp.pl?gene=CEP290">https://www.genecards.org/cgi-bin/carddisp.pl?gene=CEP290</a>     |
| MIR200B  | MicroRNA 200b                                  | RNA Gene       | 20 | GC01P001167 | 43.83263 | <a href="https://www.genecards.org/cgi-bin/carddisp.pl?gene=MIR200B">https://www.genecards.org/cgi-bin/carddisp.pl?gene=MIR200B</a>   |
| TNFRSF1A | TNF Receptor Superfamily Member 1A             | Protein Coding | 50 | GC12M006328 | 43.65583 | <a href="https://www.genecards.org/cgi-bin/carddisp.pl?gene=TNFRSF1A">https://www.genecards.org/cgi-bin/carddisp.pl?gene=TNFRSF1A</a> |
| PHKG2    | Phosphorylase Kinase Catalytic Subunit Gamma 2 | Protein Coding | 47 | GC16P032474 | 43.65182 | <a href="https://www.genecards.org/cgi-bin/carddisp.pl?gene=PHKG2">https://www.genecards.org/cgi-bin/carddisp.pl?gene=PHKG2</a>       |
| UGT1A1   | UDP Glucuronosyltransferase Family 1 Member A1 | Protein Coding | 49 | GC02P233760 | 43.62955 | <a href="https://www.genecards.org/cgi-bin/carddisp.pl?gene=UGT1A1">https://www.genecards.org/cgi-bin/carddisp.pl?gene=UGT1A1</a>     |
| HTR2A    | 5-Hydroxytryptamine Receptor 2A                | Protein Coding | 48 | GC13M046831 | 43.61702 | <a href="https://www.genecards.org/cgi-bin/carddisp.pl?gene=HTR2A">https://www.genecards.org/cgi-bin/carddisp.pl?gene=HTR2A</a>       |
| MIR143   | MicroRNA 143                                   | RNA Gene       | 23 | GC05P149410 | 43.47362 | <a href="https://www.genecards.org/cgi-bin/carddisp.pl?gene=MIR143">https://www.genecards.org/cgi-bin/carddisp.pl?gene=MIR143</a>     |
| ACADVL   | Acyl-CoA Dehydrogenase Very Long Chain         | Protein Coding | 46 | GC17P007219 | 43.4342  | <a href="https://www.genecards.org/cgi-bin/carddisp.pl?gene=ACADVL">https://www.genecards.org/cgi-bin/carddisp.pl?gene=ACADVL</a>     |
| COMT     | Catechol-O-Methyltransferase                   | Protein Coding | 52 | GC22P019941 | 43.25294 | <a href="https://www.genecards.org/cgi-bin/carddisp.pl?gene=COMT">https://www.genecards.org/cgi-bin/carddisp.pl?gene=COMT</a>         |
| HLA-B    | Major Histocompatibility Complex, Class I, B   | Protein Coding | 46 | GC06M046832 | 43.1871  | <a href="https://www.genecards.org/cgi-bin/carddisp.pl?gene=HLA-B">https://www.genecards.org/cgi-bin/carddisp.pl?gene=HLA-B</a>       |

|          |                                                                       |                |    |              |          |                                                                                                                                       |
|----------|-----------------------------------------------------------------------|----------------|----|--------------|----------|---------------------------------------------------------------------------------------------------------------------------------------|
| FADS1    | Fatty Acid Desaturase 1                                               | Protein Coding | 45 | GC11M061799  | 43.11945 | <a href="https://www.genecards.org/cgi-bin/carddisp.pl?gene=FADS1">https://www.genecards.org/cgi-bin/carddisp.pl?gene=FADS1</a>       |
| GARS1    | Glycyl-TRNA Synthetase 1                                              | Protein Coding | 37 | GC07P030580  | 43.09009 | <a href="https://www.genecards.org/cgi-bin/carddisp.pl?gene=GARS1">https://www.genecards.org/cgi-bin/carddisp.pl?gene=GARS1</a>       |
| MIR203A  | MicroRNA 203a                                                         | RNA Gene       | 19 | GC14P106054  | 43.05531 | <a href="https://www.genecards.org/cgi-bin/carddisp.pl?gene=MIR203A">https://www.genecards.org/cgi-bin/carddisp.pl?gene=MIR203A</a>   |
| MIR223   | MicroRNA 223                                                          | RNA Gene       | 21 | GC0XP066018  | 43.05186 | <a href="https://www.genecards.org/cgi-bin/carddisp.pl?gene=MIR223">https://www.genecards.org/cgi-bin/carddisp.pl?gene=MIR223</a>     |
| HSD17B10 | Hydroxysteroid 17-Beta Dehydrogenase 10                               | Protein Coding | 46 | GC0XM053431  | 43.02921 | <a href="https://www.genecards.org/cgi-bin/carddisp.pl?gene=HSD17B10">https://www.genecards.org/cgi-bin/carddisp.pl?gene=HSD17B10</a> |
| MMP1     | Matrix Metalloproteinase 1                                            | Protein Coding | 52 | GC11M102810  | 43.01691 | <a href="https://www.genecards.org/cgi-bin/carddisp.pl?gene=MMP1">https://www.genecards.org/cgi-bin/carddisp.pl?gene=MMP1</a>         |
| ADH5     | Alcohol Dehydrogenase 5 (Class III), Chi Polypeptide                  | Protein Coding | 47 | GC04M099070  | 42.67286 | <a href="https://www.genecards.org/cgi-bin/carddisp.pl?gene=ADH5">https://www.genecards.org/cgi-bin/carddisp.pl?gene=ADH5</a>         |
| SOD2     | Superoxide Dismutase 2                                                | Protein Coding | 51 | GC06M159669  | 42.65597 | <a href="https://www.genecards.org/cgi-bin/carddisp.pl?gene=SOD2">https://www.genecards.org/cgi-bin/carddisp.pl?gene=SOD2</a>         |
| MMP9     | Matrix Metalloproteinase 9                                            | Protein Coding | 54 | GC20P046008  | 42.55257 | <a href="https://www.genecards.org/cgi-bin/carddisp.pl?gene=MMP9">https://www.genecards.org/cgi-bin/carddisp.pl?gene=MMP9</a>         |
| RETN     | Resistin                                                              | Protein Coding | 44 | GC19P007669  | 42.46697 | <a href="https://www.genecards.org/cgi-bin/carddisp.pl?gene=RETN">https://www.genecards.org/cgi-bin/carddisp.pl?gene=RETN</a>         |
| MT-ND1   | Mitochondrially Encoded NADH:Ubiquinone Oxidoreductase Core Subunit 1 | Protein Coding | 33 | GCMTTP003309 | 42.44855 | <a href="https://www.genecards.org/cgi-bin/carddisp.pl?gene=MT-ND1">https://www.genecards.org/cgi-bin/carddisp.pl?gene=MT-ND1</a>     |
| PARK7    | Parkinsonism Associated Deglycase                                     | Protein Coding | 47 | GC01P008012  | 42.37277 | <a href="https://www.genecards.org/cgi-bin/carddisp.pl?gene=PARK7">https://www.genecards.org/cgi-bin/carddisp.pl?gene=PARK7</a>       |
| BSCL2    | BSCL2 Lipid Droplet Biogenesis Associated, Seipin                     | Protein Coding | 43 | GC11M069260  | 42.28667 | <a href="https://www.genecards.org/cgi-bin/carddisp.pl?gene=BSCL2">https://www.genecards.org/cgi-bin/carddisp.pl?gene=BSCL2</a>       |
| PPARGC1A | PPARG Coactivator 1 Alpha                                             | Protein Coding | 47 | GC04M023755  | 42.28547 | <a href="https://www.genecards.org/cgi-bin/carddisp.pl?gene=PPARGC1A">https://www.genecards.org/cgi-bin/carddisp.pl?gene=PPARGC1A</a> |
| AR       | Androgen Receptor                                                     | Protein Coding | 53 | GC0XP067544  | 42.14416 | <a href="https://www.genecards.org/cgi-bin/carddisp.pl?gene=AR">https://www.genecards.org/cgi-bin/carddisp.pl?gene=AR</a>             |
| CAT      | Catalase                                                              | Protein Coding | 50 | GC11P034460  | 42.04203 | <a href="https://www.genecards.org/cgi-bin/carddisp.pl?gene=CAT">https://www.genecards.org/cgi-bin/carddisp.pl?gene=CAT</a>           |
| PMP22    | Peripheral Myelin Protein 22                                          | Protein Coding | 41 | GC17M015229  | 41.85723 | <a href="https://www.genecards.org/cgi-bin/carddisp.pl?gene=PMP22">https://www.genecards.org/cgi-bin/carddisp.pl?gene=PMP22</a>       |
| SCD      | Stearoyl-CoA Desaturase                                               | Protein Coding | 49 | GC10P100347  | 41.82539 | <a href="https://www.genecards.org/cgi-bin/carddisp.pl?gene=SCD">https://www.genecards.org/cgi-bin/carddisp.pl?gene=SCD</a>           |
| FABP3    | Fatty Acid Binding Protein 3                                          | Protein Coding | 44 | GC01M031365  | 41.78497 | <a href="https://www.genecards.org/cgi-bin/carddisp.pl?gene=FABP3">https://www.genecards.org/cgi-bin/carddisp.pl?gene=FABP3</a>       |

|          |                                                        |                |    |             |          |                                                                                                                                       |
|----------|--------------------------------------------------------|----------------|----|-------------|----------|---------------------------------------------------------------------------------------------------------------------------------------|
| PEX5     | Peroxisomal Biogenesis Factor 5                        | Protein Coding | 43 | GC12P011881 | 41.78151 | <a href="https://www.genecards.org/cgi-bin/carddisp.pl?gene=PEX5">https://www.genecards.org/cgi-bin/carddisp.pl?gene=PEX5</a>         |
| MIR106B  | MicroRNA 106b                                          | RNA Gene       | 22 | GC07M100472 | 41.65577 | <a href="https://www.genecards.org/cgi-bin/carddisp.pl?gene=MIR106B">https://www.genecards.org/cgi-bin/carddisp.pl?gene=MIR106B</a>   |
| SMAD4    | SMAD Family Member 4                                   | Protein Coding | 51 | GC18P051028 | 41.64323 | <a href="https://www.genecards.org/cgi-bin/carddisp.pl?gene=SMAD4">https://www.genecards.org/cgi-bin/carddisp.pl?gene=SMAD4</a>       |
| HSPB1    | Heat Shock Protein Family B (Small) Member 1           | Protein Coding | 52 | GC07P076302 | 41.62627 | <a href="https://www.genecards.org/cgi-bin/carddisp.pl?gene=HSPB1">https://www.genecards.org/cgi-bin/carddisp.pl?gene=HSPB1</a>       |
| IL18     | Interleukin 18                                         | Protein Coding | 44 | GC11M112143 | 41.53468 | <a href="https://www.genecards.org/cgi-bin/carddisp.pl?gene=IL18">https://www.genecards.org/cgi-bin/carddisp.pl?gene=IL18</a>         |
| MIR22    | MicroRNA 22                                            | RNA Gene       | 20 | GC17M001713 | 41.40516 | <a href="https://www.genecards.org/cgi-bin/carddisp.pl?gene=MIR22">https://www.genecards.org/cgi-bin/carddisp.pl?gene=MIR22</a>       |
| PEX1     | Peroxisomal Biogenesis Factor 1                        | Protein Coding | 45 | GC07M092487 | 41.33879 | <a href="https://www.genecards.org/cgi-bin/carddisp.pl?gene=PEX1">https://www.genecards.org/cgi-bin/carddisp.pl?gene=PEX1</a>         |
| CP       | Ceruloplasmin                                          | Protein Coding | 48 | GC03M149162 | 41.33826 | <a href="https://www.genecards.org/cgi-bin/carddisp.pl?gene=CP">https://www.genecards.org/cgi-bin/carddisp.pl?gene=CP</a>             |
| NAGLU    | N-Acetyl-Alpha-Glucosaminidase                         | Protein Coding | 43 | GC17P042537 | 41.32879 | <a href="https://www.genecards.org/cgi-bin/carddisp.pl?gene=NAGLU">https://www.genecards.org/cgi-bin/carddisp.pl?gene=NAGLU</a>       |
| ERBB2    | Erb-B2 Receptor Tyrosine Kinase 2                      | Protein Coding | 54 | GC17P039687 | 41.31289 | <a href="https://www.genecards.org/cgi-bin/carddisp.pl?gene=ERBB2">https://www.genecards.org/cgi-bin/carddisp.pl?gene=ERBB2</a>       |
| HAMP     | Hepcidin Antimicrobial Peptide                         | Protein Coding | 44 | GC19P040344 | 41.29496 | <a href="https://www.genecards.org/cgi-bin/carddisp.pl?gene=HAMP">https://www.genecards.org/cgi-bin/carddisp.pl?gene=HAMP</a>         |
| CYP1A1   | Cytochrome P450 Family 1 Subfamily A Member 1          | Protein Coding | 48 | GC15M074719 | 41.27938 | <a href="https://www.genecards.org/cgi-bin/carddisp.pl?gene=CYP1A1">https://www.genecards.org/cgi-bin/carddisp.pl?gene=CYP1A1</a>     |
| ABHD5    | Abhydrolase Domain Containing 5, Lysophosphatidic Acid | Protein Coding | 45 | GC03P043707 | 41.19246 | <a href="https://www.genecards.org/cgi-bin/carddisp.pl?gene=ABHD5">https://www.genecards.org/cgi-bin/carddisp.pl?gene=ABHD5</a>       |
| NOTCH1   | Acyltransferase Notch Receptor 1                       | Protein Coding | 51 | GC09M136705 | 41.00478 | <a href="https://www.genecards.org/cgi-bin/carddisp.pl?gene=NOTCH1">https://www.genecards.org/cgi-bin/carddisp.pl?gene=NOTCH1</a>     |
| SERPINA3 | Serpin Family A Member 3                               | Protein Coding | 44 | GC14P094612 | 40.99447 | <a href="https://www.genecards.org/cgi-bin/carddisp.pl?gene=SERPINA3">https://www.genecards.org/cgi-bin/carddisp.pl?gene=SERPINA3</a> |
| ADH1A    | Alcohol Dehydrogenase 1A (Class I), Alpha              | Protein Coding | 43 | GC04M099276 | 40.94531 | <a href="https://www.genecards.org/cgi-bin/carddisp.pl?gene=ADH1A">https://www.genecards.org/cgi-bin/carddisp.pl?gene=ADH1A</a>       |
| AARS1    | Polypeptide Alanyl-TRNA Synthetase 1                   | Protein Coding | 37 | GC16M070343 | 40.93534 | <a href="https://www.genecards.org/cgi-bin/carddisp.pl?gene=AARS1">https://www.genecards.org/cgi-bin/carddisp.pl?gene=AARS1</a>       |
| HSD17B4  | Hydroxysteroid 17-Beta Dehydrogenase 4                 | Protein Coding | 47 | GC05P119452 | 40.9006  | <a href="https://www.genecards.org/cgi-bin/carddisp.pl?gene=HSD17B4">https://www.genecards.org/cgi-bin/carddisp.pl?gene=HSD17B4</a>   |

|        |                                                        |                |    |             |          |                                                                                                                                   |
|--------|--------------------------------------------------------|----------------|----|-------------|----------|-----------------------------------------------------------------------------------------------------------------------------------|
| JAG1   | Jagged Canonical Notch Ligand 1                        | Protein Coding | 51 | GC20M010637 | 40.87424 | <a href="https://www.genecards.org/cgi-bin/carddisp.pl?gene=JAG1">https://www.genecards.org/cgi-bin/carddisp.pl?gene=JAG1</a>     |
| FAAH   | Fatty Acid Amide Hydrolase                             | Protein Coding | 48 | GC01P046394 | 40.82689 | <a href="https://www.genecards.org/cgi-bin/carddisp.pl?gene=FAAH">https://www.genecards.org/cgi-bin/carddisp.pl?gene=FAAH</a>     |
| HTT    | Huntingtin                                             | Protein Coding | 44 | GC04P003041 | 40.73323 | <a href="https://www.genecards.org/cgi-bin/carddisp.pl?gene=HTT">https://www.genecards.org/cgi-bin/carddisp.pl?gene=HTT</a>       |
| FADS2  | Fatty Acid Desaturase 2                                | Protein Coding | 45 | GC11P061792 | 40.73115 | <a href="https://www.genecards.org/cgi-bin/carddisp.pl?gene=FADS2">https://www.genecards.org/cgi-bin/carddisp.pl?gene=FADS2</a>   |
| GSTM1  | Glutathione S-Transferase Mu 1                         | Protein Coding | 43 | GC01P109687 | 40.72124 | <a href="https://www.genecards.org/cgi-bin/carddisp.pl?gene=GSTM1">https://www.genecards.org/cgi-bin/carddisp.pl?gene=GSTM1</a>   |
| MIR126 | MicroRNA 126                                           | RNA Gene       | 22 | GC09P136670 | 40.57684 | <a href="https://www.genecards.org/cgi-bin/carddisp.pl?gene=MIR126">https://www.genecards.org/cgi-bin/carddisp.pl?gene=MIR126</a> |
| LIPC   | Lipase C, Hepatic Type                                 | Protein Coding | 46 | GC15P058410 | 40.48891 | <a href="https://www.genecards.org/cgi-bin/carddisp.pl?gene=LIPC">https://www.genecards.org/cgi-bin/carddisp.pl?gene=LIPC</a>     |
| PSEN2  | Presenilin 2                                           | Protein Coding | 50 | GC01P226870 | 40.48117 | <a href="https://www.genecards.org/cgi-bin/carddisp.pl?gene=PSEN2">https://www.genecards.org/cgi-bin/carddisp.pl?gene=PSEN2</a>   |
| GABRA2 | Gamma-Aminobutyric Acid Type A Receptor Subunit Alpha2 | Protein Coding | 47 | GC04M046243 | 40.41587 | <a href="https://www.genecards.org/cgi-bin/carddisp.pl?gene=GABRA2">https://www.genecards.org/cgi-bin/carddisp.pl?gene=GABRA2</a> |
| IGF2   | Insulin Like Growth Factor 2                           | Protein Coding | 48 | GC11M002130 | 40.3887  | <a href="https://www.genecards.org/cgi-bin/carddisp.pl?gene=IGF2">https://www.genecards.org/cgi-bin/carddisp.pl?gene=IGF2</a>     |
| ICAM1  | Intercellular Adhesion Molecule 1                      | Protein Coding | 51 | GC19P010270 | 40.3847  | <a href="https://www.genecards.org/cgi-bin/carddisp.pl?gene=ICAM1">https://www.genecards.org/cgi-bin/carddisp.pl?gene=ICAM1</a>   |
| SLC6A4 | Solute Carrier Family 6 Member 4                       | Protein Coding | 48 | GC17M030194 | 40.3251  | <a href="https://www.genecards.org/cgi-bin/carddisp.pl?gene=SLC6A4">https://www.genecards.org/cgi-bin/carddisp.pl?gene=SLC6A4</a> |
| FA2H   | Fatty Acid 2-Hydroxylase                               | Protein Coding | 45 | GC16M074712 | 40.22961 | <a href="https://www.genecards.org/cgi-bin/carddisp.pl?gene=FA2H">https://www.genecards.org/cgi-bin/carddisp.pl?gene=FA2H</a>     |
| IL2    | Interleukin 2                                          | Protein Coding | 45 | GC04M122451 | 40.22802 | <a href="https://www.genecards.org/cgi-bin/carddisp.pl?gene=IL2">https://www.genecards.org/cgi-bin/carddisp.pl?gene=IL2</a>       |
| CCND1  | Cyclin D1                                              | Protein Coding | 52 | GC11P069641 | 40.22279 | <a href="https://www.genecards.org/cgi-bin/carddisp.pl?gene=CCND1">https://www.genecards.org/cgi-bin/carddisp.pl?gene=CCND1</a>   |
| HGF    | Hepatocyte Growth Factor                               | Protein Coding | 52 | GC07M081699 | 40.17495 | <a href="https://www.genecards.org/cgi-bin/carddisp.pl?gene=HGF">https://www.genecards.org/cgi-bin/carddisp.pl?gene=HGF</a>       |
| MIR20A | MicroRNA 20a                                           | RNA Gene       | 19 | GC13P091444 | 40.15267 | <a href="https://www.genecards.org/cgi-bin/carddisp.pl?gene=MIR20A">https://www.genecards.org/cgi-bin/carddisp.pl?gene=MIR20A</a> |
| GNDF   | Glial Cell Derived Neurotrophic Factor                 | Protein Coding | 48 | GC05M037812 | 40.03215 | <a href="https://www.genecards.org/cgi-bin/carddisp.pl?gene=GNDF">https://www.genecards.org/cgi-bin/carddisp.pl?gene=GNDF</a>     |
| BRCA1  | BRCA1 DNA Repair Associated                            | Protein Coding | 51 | GC17M043044 | 40.025   | <a href="https://www.genecards.org/cgi-bin/carddisp.pl?gene=BRCA1">https://www.genecards.org/cgi-bin/carddisp.pl?gene=BRCA1</a>   |
| IL1RN  | Interleukin 1 Receptor Antagonist                      | Protein Coding | 48 | GC02P116694 | 39.97456 | <a href="https://www.genecards.org/cgi-bin/carddisp.pl?gene=IL1RN">https://www.genecards.org/cgi-bin/carddisp.pl?gene=IL1RN</a>   |
| ESR1   | Estrogen Receptor 1                                    | Protein Coding | 53 | GC06P151656 | 39.92862 | <a href="https://www.genecards.org/cgi-bin/carddisp.pl?gene=ESR1">https://www.genecards.org/cgi-bin/carddisp.pl?gene=ESR1</a>     |

|         |                                                                         |                |    |             |          |                                                                                                                                     |
|---------|-------------------------------------------------------------------------|----------------|----|-------------|----------|-------------------------------------------------------------------------------------------------------------------------------------|
| FASLG   | Fas Ligand                                                              | Protein Coding | 48 | GC01P172628 | 39.92387 | <a href="https://www.genecards.org/cgi-bin/carddisp.pl?gene=FASLG">https://www.genecards.org/cgi-bin/carddisp.pl?gene=FASLG</a>     |
| ADH7    | Alcohol Dehydrogenase 7 (Class IV), Mu Or Sigma Polypeptide ATP Binding | Protein Coding | 45 | GC04M099412 | 39.8848  | <a href="https://www.genecards.org/cgi-bin/carddisp.pl?gene=ADH7">https://www.genecards.org/cgi-bin/carddisp.pl?gene=ADH7</a>       |
| ABCB1   | Cassette Subfamily B Member 1 Phenylalanyl-TRNA                         | Protein Coding | 52 | GC07M087504 | 39.84828 | <a href="https://www.genecards.org/cgi-bin/carddisp.pl?gene=ABCB1">https://www.genecards.org/cgi-bin/carddisp.pl?gene=ABCB1</a>     |
| FARSB   | Synthetase Subunit Beta                                                 | Protein Coding | 45 | GC02M222570 | 39.83929 | <a href="https://www.genecards.org/cgi-bin/carddisp.pl?gene=FARSB">https://www.genecards.org/cgi-bin/carddisp.pl?gene=FARSB</a>     |
| PRX     | Periaxin                                                                | Protein Coding | 40 | GC19M040393 | 39.81201 | <a href="https://www.genecards.org/cgi-bin/carddisp.pl?gene=PRX">https://www.genecards.org/cgi-bin/carddisp.pl?gene=PRX</a>         |
| CC2D2A  | Coiled-Coil And C2 Domain Containing 2A                                 | Protein Coding | 38 | GC04P015471 | 39.7771  | <a href="https://www.genecards.org/cgi-bin/carddisp.pl?gene=CC2D2A">https://www.genecards.org/cgi-bin/carddisp.pl?gene=CC2D2A</a>   |
| F5      | Coagulation Factor V                                                    | Protein Coding | 45 | GC01M169511 | 39.71928 | <a href="https://www.genecards.org/cgi-bin/carddisp.pl?gene=F5">https://www.genecards.org/cgi-bin/carddisp.pl?gene=F5</a>           |
| MAPK1   | Mitogen-Activated Protein Kinase 1                                      | Protein Coding | 52 | GC22M021754 | 39.71365 | <a href="https://www.genecards.org/cgi-bin/carddisp.pl?gene=MAPK1">https://www.genecards.org/cgi-bin/carddisp.pl?gene=MAPK1</a>     |
| YARS1   | Tyrosyl-TRNA Synthetase 1                                               | Protein Coding | 37 | GC01M032776 | 39.64629 | <a href="https://www.genecards.org/cgi-bin/carddisp.pl?gene=YARS1">https://www.genecards.org/cgi-bin/carddisp.pl?gene=YARS1</a>     |
| DNM2    | Dynamin 2                                                               | Protein Coding | 50 | GC19P010718 | 39.50795 | <a href="https://www.genecards.org/cgi-bin/carddisp.pl?gene=DNM2">https://www.genecards.org/cgi-bin/carddisp.pl?gene=DNM2</a>       |
| HADH    | Hydroxyacyl-CoA Dehydrogenase                                           | Protein Coding | 47 | GC04P107989 | 39.49352 | <a href="https://www.genecards.org/cgi-bin/carddisp.pl?gene=HADH">https://www.genecards.org/cgi-bin/carddisp.pl?gene=HADH</a>       |
| IGF2R   | Insulin Like Growth Factor 2 Receptor                                   | Protein Coding | 46 | GC06P159969 | 39.49142 | <a href="https://www.genecards.org/cgi-bin/carddisp.pl?gene=IGF2R">https://www.genecards.org/cgi-bin/carddisp.pl?gene=IGF2R</a>     |
| UCP2    | Uncoupling Protein 2                                                    | Protein Coding | 46 | GC11M073974 | 39.47613 | <a href="https://www.genecards.org/cgi-bin/carddisp.pl?gene=UCP2">https://www.genecards.org/cgi-bin/carddisp.pl?gene=UCP2</a>       |
| PINK1   | PTEN Induced Kinase 1                                                   | Protein Coding | 48 | GC01P020634 | 39.441   | <a href="https://www.genecards.org/cgi-bin/carddisp.pl?gene=PINK1">https://www.genecards.org/cgi-bin/carddisp.pl?gene=PINK1</a>     |
| IGHMBP2 | Immunoglobulin Mu DNA Binding Protein 2                                 | Protein Coding | 42 | GC11P068903 | 39.37398 | <a href="https://www.genecards.org/cgi-bin/carddisp.pl?gene=IGHMBP2">https://www.genecards.org/cgi-bin/carddisp.pl?gene=IGHMBP2</a> |
| ALDH3A2 | Aldehyde Dehydrogenase 3 Family Member A2                               | Protein Coding | 45 | GC17P019648 | 39.27642 | <a href="https://www.genecards.org/cgi-bin/carddisp.pl?gene=ALDH3A2">https://www.genecards.org/cgi-bin/carddisp.pl?gene=ALDH3A2</a> |
| DYNC1H1 | Dynein Cytoplasmic 1 Heavy Chain 1                                      | Protein Coding | 45 | GC14P106032 | 39.27556 | <a href="https://www.genecards.org/cgi-bin/carddisp.pl?gene=DYNC1H1">https://www.genecards.org/cgi-bin/carddisp.pl?gene=DYNC1H1</a> |
| TMEM67  | Transmembrane Protein 67                                                | Protein Coding | 38 | GC08P093754 | 39.24709 | <a href="https://www.genecards.org/cgi-bin/carddisp.pl?gene=TMEM67">https://www.genecards.org/cgi-bin/carddisp.pl?gene=TMEM67</a>   |
| HEXA    | Hexosaminidase Subunit Alpha                                            | Protein Coding | 46 | GC15M072340 | 39.15423 | <a href="https://www.genecards.org/cgi-bin/carddisp.pl?gene=HEXA">https://www.genecards.org/cgi-bin/carddisp.pl?gene=HEXA</a>       |

|        |                                               |                |    |             |          |                                                                                                                                   |
|--------|-----------------------------------------------|----------------|----|-------------|----------|-----------------------------------------------------------------------------------------------------------------------------------|
| PTGS2  | Prostaglandin-Endoperoxide Synthase 2         | Protein Coding | 49 | GC01M186640 | 39.11338 | <a href="https://www.genecards.org/cgi-bin/carddisp.pl?gene=PTGS2">https://www.genecards.org/cgi-bin/carddisp.pl?gene=PTGS2</a>   |
| PLA2G6 | Phospholipase A2 Group VI                     | Protein Coding | 48 | GC22M049636 | 39.06322 | <a href="https://www.genecards.org/cgi-bin/carddisp.pl?gene=PLA2G6">https://www.genecards.org/cgi-bin/carddisp.pl?gene=PLA2G6</a> |
| CAV1   | Caveolin 1                                    | Protein Coding | 48 | GC07P116524 | 39.05238 | <a href="https://www.genecards.org/cgi-bin/carddisp.pl?gene=CAV1">https://www.genecards.org/cgi-bin/carddisp.pl?gene=CAV1</a>     |
| FIG4   | FIG4 Phosphoinositide 5-Phosphatase           | Protein Coding | 44 | GC06P109691 | 39.04974 | <a href="https://www.genecards.org/cgi-bin/carddisp.pl?gene=FIG4">https://www.genecards.org/cgi-bin/carddisp.pl?gene=FIG4</a>     |
| MIR221 | MicroRNA 221                                  | RNA Gene       | 20 | GC0XM045746 | 38.90244 | <a href="https://www.genecards.org/cgi-bin/carddisp.pl?gene=MIR221">https://www.genecards.org/cgi-bin/carddisp.pl?gene=MIR221</a> |
| MTOR   | Mechanistic Target Of Rapamycin Kinase        | Protein Coding | 54 | GC01M011106 | 38.86319 | <a href="https://www.genecards.org/cgi-bin/carddisp.pl?gene=MTOR">https://www.genecards.org/cgi-bin/carddisp.pl?gene=MTOR</a>     |
| ATP8B1 | ATPase Phospholipid Transporting 8B1          | Protein Coding | 40 | GC18M057646 | 38.82219 | <a href="https://www.genecards.org/cgi-bin/carddisp.pl?gene=ATP8B1">https://www.genecards.org/cgi-bin/carddisp.pl?gene=ATP8B1</a> |
| CFH    | Complement Factor H                           | Protein Coding | 46 | GC01P196621 | 38.72898 | <a href="https://www.genecards.org/cgi-bin/carddisp.pl?gene=CFH">https://www.genecards.org/cgi-bin/carddisp.pl?gene=CFH</a>       |
| SPP1   | Secreted Phosphoprotein 1                     | Protein Coding | 47 | GC04P087975 | 38.65092 | <a href="https://www.genecards.org/cgi-bin/carddisp.pl?gene=SPP1">https://www.genecards.org/cgi-bin/carddisp.pl?gene=SPP1</a>     |
| ABCC2  | ATP Binding Cassette Subfamily C Member 2     | Protein Coding | 48 | GC10P099782 | 38.58338 | <a href="https://www.genecards.org/cgi-bin/carddisp.pl?gene=ABCC2">https://www.genecards.org/cgi-bin/carddisp.pl?gene=ABCC2</a>   |
| CYBA   | Cytochrome B-245 Alpha Chain                  | Protein Coding | 48 | GC16M088643 | 38.52029 | <a href="https://www.genecards.org/cgi-bin/carddisp.pl?gene=CYBA">https://www.genecards.org/cgi-bin/carddisp.pl?gene=CYBA</a>     |
| ASAH1  | N-Acylsphingosine Amidohydrolase 1            | Protein Coding | 47 | GC08M018055 | 38.43977 | <a href="https://www.genecards.org/cgi-bin/carddisp.pl?gene=ASAH1">https://www.genecards.org/cgi-bin/carddisp.pl?gene=ASAH1</a>   |
| VHL    | Von Hippel-Lindau Tumor Suppressor            | Protein Coding | 47 | GC03P011015 | 38.43132 | <a href="https://www.genecards.org/cgi-bin/carddisp.pl?gene=VHL">https://www.genecards.org/cgi-bin/carddisp.pl?gene=VHL</a>       |
| IL4    | Interleukin 4                                 | Protein Coding | 46 | GC05P132673 | 38.40767 | <a href="https://www.genecards.org/cgi-bin/carddisp.pl?gene=IL4">https://www.genecards.org/cgi-bin/carddisp.pl?gene=IL4</a>       |
| MAPK8  | Mitogen-Activated Protein Kinase 8            | Protein Coding | 51 | GC10P048306 | 38.08849 | <a href="https://www.genecards.org/cgi-bin/carddisp.pl?gene=MAPK8">https://www.genecards.org/cgi-bin/carddisp.pl?gene=MAPK8</a>   |
| CDH1   | Cadherin 1                                    | Protein Coding | 51 | GC16P068737 | 38.05853 | <a href="https://www.genecards.org/cgi-bin/carddisp.pl?gene=CDH1">https://www.genecards.org/cgi-bin/carddisp.pl?gene=CDH1</a>     |
| LCAT   | Lecithin-Cholesterol Acyltransferase          | Protein Coding | 47 | GC16M067939 | 38.00154 | <a href="https://www.genecards.org/cgi-bin/carddisp.pl?gene=LCAT">https://www.genecards.org/cgi-bin/carddisp.pl?gene=LCAT</a>     |
| CYP1A2 | Cytochrome P450 Family 1 Subfamily A Member 2 | Protein Coding | 46 | GC15P074748 | 37.88988 | <a href="https://www.genecards.org/cgi-bin/carddisp.pl?gene=CYP1A2">https://www.genecards.org/cgi-bin/carddisp.pl?gene=CYP1A2</a> |

|         |                                                    |                |    |             |          |                                                                                                                                     |
|---------|----------------------------------------------------|----------------|----|-------------|----------|-------------------------------------------------------------------------------------------------------------------------------------|
| PTPN11  | Protein Tyrosine Phosphatase Non-Receptor Type 11  | Protein Coding | 54 | GC12P112418 | 37.85031 | <a href="https://www.genecards.org/cgi-bin/carddisp.pl?gene=PTPN11">https://www.genecards.org/cgi-bin/carddisp.pl?gene=PTPN11</a>   |
| PYGM    | Glycogen Phosphorylase, Muscle Associated          | Protein Coding | 47 | GC11M064746 | 37.7818  | <a href="https://www.genecards.org/cgi-bin/carddisp.pl?gene=PYGM">https://www.genecards.org/cgi-bin/carddisp.pl?gene=PYGM</a>       |
| F9      | Coagulation Factor IX                              | Protein Coding | 47 | GC0XP139530 | 37.73995 | <a href="https://www.genecards.org/cgi-bin/carddisp.pl?gene=F9">https://www.genecards.org/cgi-bin/carddisp.pl?gene=F9</a>           |
| HMGCR   | 3-Hydroxy-3-Methylglutaryl-CoA Reductase           | Protein Coding | 47 | GC05P075336 | 37.69389 | <a href="https://www.genecards.org/cgi-bin/carddisp.pl?gene=HMGCR">https://www.genecards.org/cgi-bin/carddisp.pl?gene=HMGCR</a>     |
| NFKB1   | Nuclear Factor Kappa B Subunit 1                   | Protein Coding | 52 | GC04P102501 | 37.68575 | <a href="https://www.genecards.org/cgi-bin/carddisp.pl?gene=NFKB1">https://www.genecards.org/cgi-bin/carddisp.pl?gene=NFKB1</a>     |
| PHYH    | Phytanoyl-CoA 2-Hydroxylase                        | Protein Coding | 46 | GC10M013277 | 37.60526 | <a href="https://www.genecards.org/cgi-bin/carddisp.pl?gene=PHYH">https://www.genecards.org/cgi-bin/carddisp.pl?gene=PHYH</a>       |
| PNPLA2  | Patatin Like Phospholipase Domain Containing 2     | Protein Coding | 45 | GC11P000994 | 37.59045 | <a href="https://www.genecards.org/cgi-bin/carddisp.pl?gene=PNPLA2">https://www.genecards.org/cgi-bin/carddisp.pl?gene=PNPLA2</a>   |
| CYP27A1 | Cytochrome P450 Family 27 Subfamily A Member 1     | Protein Coding | 48 | GC02P218781 | 37.35265 | <a href="https://www.genecards.org/cgi-bin/carddisp.pl?gene=CYP27A1">https://www.genecards.org/cgi-bin/carddisp.pl?gene=CYP27A1</a> |
| CDKN2A  | Cyclin Dependent Kinase Inhibitor 2A               | Protein Coding | 52 | GC09M021967 | 37.34846 | <a href="https://www.genecards.org/cgi-bin/carddisp.pl?gene=CDKN2A">https://www.genecards.org/cgi-bin/carddisp.pl?gene=CDKN2A</a>   |
| APOC3   | Apolipoprotein C3                                  | Protein Coding | 44 | GC11P116829 | 37.31222 | <a href="https://www.genecards.org/cgi-bin/carddisp.pl?gene=APOC3">https://www.genecards.org/cgi-bin/carddisp.pl?gene=APOC3</a>     |
| MUC1    | Mucin 1, Cell Surface Associated                   | Protein Coding | 47 | GC01M155185 | 37.22253 | <a href="https://www.genecards.org/cgi-bin/carddisp.pl?gene=MUC1">https://www.genecards.org/cgi-bin/carddisp.pl?gene=MUC1</a>       |
| STAT1   | Signal Transducer And Activator Of Transcription 1 | Protein Coding | 54 | GC02M190908 | 37.14822 | <a href="https://www.genecards.org/cgi-bin/carddisp.pl?gene=STAT1">https://www.genecards.org/cgi-bin/carddisp.pl?gene=STAT1</a>     |
| COL2A1  | Collagen Type II Alpha 1 Chain                     | Protein Coding | 49 | GC12M047972 | 37.08184 | <a href="https://www.genecards.org/cgi-bin/carddisp.pl?gene=COL2A1">https://www.genecards.org/cgi-bin/carddisp.pl?gene=COL2A1</a>   |
| GSTP1   | Glutathione S-Transferase Pi 1                     | Protein Coding | 51 | GC11P067583 | 36.93613 | <a href="https://www.genecards.org/cgi-bin/carddisp.pl?gene=GSTP1">https://www.genecards.org/cgi-bin/carddisp.pl?gene=GSTP1</a>     |
| KIT     | KIT Proto-Oncogene, Receptor Tyrosine Kinase       | Protein Coding | 53 | GC04P054657 | 36.91124 | <a href="https://www.genecards.org/cgi-bin/carddisp.pl?gene=KIT">https://www.genecards.org/cgi-bin/carddisp.pl?gene=KIT</a>         |
| ACACA   | Acetyl-CoA Carboxylase Alpha                       | Protein Coding | 50 | GC17M037084 | 36.90222 | <a href="https://www.genecards.org/cgi-bin/carddisp.pl?gene=ACACA">https://www.genecards.org/cgi-bin/carddisp.pl?gene=ACACA</a>     |



|         |                                                                  |                |    |              |          |                                                                                                                                     |
|---------|------------------------------------------------------------------|----------------|----|--------------|----------|-------------------------------------------------------------------------------------------------------------------------------------|
| SLC6A3  | Solute Carrier Family 6 Member 3                                 | Protein Coding | 50 | GC05M001392  | 36.87577 | <a href="https://www.genecards.org/cgi-bin/carddisp.pl?gene=SLC6A3">https://www.genecards.org/cgi-bin/carddisp.pl?gene=SLC6A3</a>   |
| MIR222  | MicroRNA 222                                                     | RNA Gene       | 21 | GC0XM045747  | 36.82392 | <a href="https://www.genecards.org/cgi-bin/carddisp.pl?gene=MIR222">https://www.genecards.org/cgi-bin/carddisp.pl?gene=MIR222</a>   |
| GRIN2B  | Glutamate Ionotropic Receptor NMDA Type Subunit 2B               | Protein Coding | 51 | GC12M013437  | 36.73241 | <a href="https://www.genecards.org/cgi-bin/carddisp.pl?gene=GRIN2B">https://www.genecards.org/cgi-bin/carddisp.pl?gene=GRIN2B</a>   |
| PROM1   | Prominin 1                                                       | Protein Coding | 45 | GC04M015965  | 36.68137 | <a href="https://www.genecards.org/cgi-bin/carddisp.pl?gene=PROM1">https://www.genecards.org/cgi-bin/carddisp.pl?gene=PROM1</a>     |
| MLXIPL  | MLX Interacting Protein Like                                     | Protein Coding | 43 | GC07M073593  | 36.64859 | <a href="https://www.genecards.org/cgi-bin/carddisp.pl?gene=MLXIPL">https://www.genecards.org/cgi-bin/carddisp.pl?gene=MLXIPL</a>   |
| SLC22A5 | Solute Carrier Family 22 Member 5                                | Protein Coding | 47 | GC05P132369  | 36.60142 | <a href="https://www.genecards.org/cgi-bin/carddisp.pl?gene=SLC22A5">https://www.genecards.org/cgi-bin/carddisp.pl?gene=SLC22A5</a> |
| BCS1L   | BCS1 Homolog, Ubiquinol-Cytochrome C Reductase Complex Chaperone | Protein Coding | 45 | GC02P218658  | 36.50166 | <a href="https://www.genecards.org/cgi-bin/carddisp.pl?gene=BCS1L">https://www.genecards.org/cgi-bin/carddisp.pl?gene=BCS1L</a>     |
| RELA    | RELA Proto-Oncogene, NF-KB Subunit                               | Protein Coding | 51 | GC11M065653  | 36.49992 | <a href="https://www.genecards.org/cgi-bin/carddisp.pl?gene=RELA">https://www.genecards.org/cgi-bin/carddisp.pl?gene=RELA</a>       |
| CYP2C9  | Cytochrome P450 Family 2 Subfamily C Member 9                    | Protein Coding | 50 | GC10P094938  | 36.45664 | <a href="https://www.genecards.org/cgi-bin/carddisp.pl?gene=CYP2C9">https://www.genecards.org/cgi-bin/carddisp.pl?gene=CYP2C9</a>   |
| IRS2    | Insulin Receptor Substrate 2                                     | Protein Coding | 45 | GC13M109752  | 36.43042 | <a href="https://www.genecards.org/cgi-bin/carddisp.pl?gene=IRS2">https://www.genecards.org/cgi-bin/carddisp.pl?gene=IRS2</a>       |
| ALG8    | ALG8 Alpha-1,3-Glucosyltransferase                               | Protein Coding | 44 | GC11M078100  | 36.41171 | <a href="https://www.genecards.org/cgi-bin/carddisp.pl?gene=ALG8">https://www.genecards.org/cgi-bin/carddisp.pl?gene=ALG8</a>       |
| MT-ATP6 | Mitochondrially Encoded ATP Synthase Membrane Subunit 6          | Protein Coding | 33 | GCMTTP008531 | 36.40771 | <a href="https://www.genecards.org/cgi-bin/carddisp.pl?gene=MT-ATP6">https://www.genecards.org/cgi-bin/carddisp.pl?gene=MT-ATP6</a> |
| PLP1    | Proteolipid Protein 1                                            | Protein Coding | 44 | GC0XP103773  | 36.40392 | <a href="https://www.genecards.org/cgi-bin/carddisp.pl?gene=PLP1">https://www.genecards.org/cgi-bin/carddisp.pl?gene=PLP1</a>       |
| DNAJB11 | DnaJ Heat Shock Protein Family (Hsp40) Member B11                | Protein Coding | 41 | GC03P186567  | 36.38556 | <a href="https://www.genecards.org/cgi-bin/carddisp.pl?gene=DNAJB11">https://www.genecards.org/cgi-bin/carddisp.pl?gene=DNAJB11</a> |
| REN     | Renin                                                            | Protein Coding | 48 | GC01M204154  | 36.35252 | <a href="https://www.genecards.org/cgi-bin/carddisp.pl?gene=REN">https://www.genecards.org/cgi-bin/carddisp.pl?gene=REN</a>         |
| EHHADH  | Enoyl-CoA Hydratase And 3-Hydroxyacyl CoA Dehydrogenase          | Protein Coding | 45 | GC03M185190  | 36.2691  | <a href="https://www.genecards.org/cgi-bin/carddisp.pl?gene=EHHADH">https://www.genecards.org/cgi-bin/carddisp.pl?gene=EHHADH</a>   |

|         |                                                       |                |    |             |          |                                                                                                                                     |
|---------|-------------------------------------------------------|----------------|----|-------------|----------|-------------------------------------------------------------------------------------------------------------------------------------|
| AGT     | Angiotensinogen                                       | Protein Coding | 50 | GC01M230702 | 36.25179 | <a href="https://www.genecards.org/cgi-bin/carddisp.pl?gene=AGT">https://www.genecards.org/cgi-bin/carddisp.pl?gene=AGT</a>         |
| KIF1B   | Kinesin Family Member 1B                              | Protein Coding | 45 | GC01P010210 | 36.22093 | <a href="https://www.genecards.org/cgi-bin/carddisp.pl?gene=KIF1B">https://www.genecards.org/cgi-bin/carddisp.pl?gene=KIF1B</a>     |
| EDNRB   | Endothelin Receptor Type B                            | Protein Coding | 50 | GC13M077895 | 36.21944 | <a href="https://www.genecards.org/cgi-bin/carddisp.pl?gene=EDNRB">https://www.genecards.org/cgi-bin/carddisp.pl?gene=EDNRB</a>     |
| PEX19   | Peroxisomal Biogenesis Factor 19                      | Protein Coding | 43 | GC01M160276 | 36.19999 | <a href="https://www.genecards.org/cgi-bin/carddisp.pl?gene=PEX19">https://www.genecards.org/cgi-bin/carddisp.pl?gene=PEX19</a>     |
| HRAS    | HRas Proto-Oncogene, GTPase                           | Protein Coding | 52 | GC11M001078 | 36.19028 | <a href="https://www.genecards.org/cgi-bin/carddisp.pl?gene=HRAS">https://www.genecards.org/cgi-bin/carddisp.pl?gene=HRAS</a>       |
| CYP2D6  | Cytochrome P450 Family 2 Subfamily D Member 6         | Protein Coding | 49 | GC22M042126 | 36.18971 | <a href="https://www.genecards.org/cgi-bin/carddisp.pl?gene=CYP2D6">https://www.genecards.org/cgi-bin/carddisp.pl?gene=CYP2D6</a>   |
| CYP2C19 | Cytochrome P450 Family 2 Subfamily C Member 19        | Protein Coding | 48 | GC10P094762 | 36.17167 | <a href="https://www.genecards.org/cgi-bin/carddisp.pl?gene=CYP2C19">https://www.genecards.org/cgi-bin/carddisp.pl?gene=CYP2C19</a> |
| HP      | Haptoglobin                                           | Protein Coding | 45 | GC16P072089 | 36.10358 | <a href="https://www.genecards.org/cgi-bin/carddisp.pl?gene=HP">https://www.genecards.org/cgi-bin/carddisp.pl?gene=HP</a>           |
| TTN     | Titin                                                 | Protein Coding | 48 | GC02M178525 | 36.07557 | <a href="https://www.genecards.org/cgi-bin/carddisp.pl?gene=TTN">https://www.genecards.org/cgi-bin/carddisp.pl?gene=TTN</a>         |
| MME     | Membrane Metalloendopeptidase                         | Protein Coding | 51 | GC03P155024 | 35.78926 | <a href="https://www.genecards.org/cgi-bin/carddisp.pl?gene=MME">https://www.genecards.org/cgi-bin/carddisp.pl?gene=MME</a>         |
| SLC2A1  | Solute Carrier Family 2 Member 1                      | Protein Coding | 53 | GC01M042925 | 35.76385 | <a href="https://www.genecards.org/cgi-bin/carddisp.pl?gene=SLC2A1">https://www.genecards.org/cgi-bin/carddisp.pl?gene=SLC2A1</a>   |
| SDHB    | Succinate Dehydrogenase Complex Iron Sulfur Subunit B | Protein Coding | 48 | GC01M017238 | 35.74825 | <a href="https://www.genecards.org/cgi-bin/carddisp.pl?gene=SDHB">https://www.genecards.org/cgi-bin/carddisp.pl?gene=SDHB</a>       |
| PCSK9   | Proprotein Convertase Subtilisin/Kexin Type 9         | Protein Coding | 51 | GC01P055039 | 35.70944 | <a href="https://www.genecards.org/cgi-bin/carddisp.pl?gene=PCSK9">https://www.genecards.org/cgi-bin/carddisp.pl?gene=PCSK9</a>     |
| TGFBR2  | Transforming Growth Factor Beta Receptor 2            | Protein Coding | 51 | GC03P030623 | 35.63598 | <a href="https://www.genecards.org/cgi-bin/carddisp.pl?gene=TGFBR2">https://www.genecards.org/cgi-bin/carddisp.pl?gene=TGFBR2</a>   |
| MYC     | MYC Proto-Oncogene, BHLH Transcription Factor         | Protein Coding | 51 | GC08P127735 | 35.60102 | <a href="https://www.genecards.org/cgi-bin/carddisp.pl?gene=MYC">https://www.genecards.org/cgi-bin/carddisp.pl?gene=MYC</a>         |
| SBF2    | SET Binding Factor 2                                  | Protein Coding | 40 | GC11M009789 | 35.58323 | <a href="https://www.genecards.org/cgi-bin/carddisp.pl?gene=SBF2">https://www.genecards.org/cgi-bin/carddisp.pl?gene=SBF2</a>       |
| PEX16   | Peroxisomal Biogenesis Factor 16                      | Protein Coding | 39 | GC11M068965 | 35.58163 | <a href="https://www.genecards.org/cgi-bin/carddisp.pl?gene=PEX16">https://www.genecards.org/cgi-bin/carddisp.pl?gene=PEX16</a>     |
| ANO5    | Anoctamin 5                                           | Protein Coding | 38 | GC11P021799 | 35.56927 | <a href="https://www.genecards.org/cgi-bin/carddisp.pl?gene=ANO5">https://www.genecards.org/cgi-bin/carddisp.pl?gene=ANO5</a>       |

|          |                                                            |                |    |             |          |                                                                                                                                       |
|----------|------------------------------------------------------------|----------------|----|-------------|----------|---------------------------------------------------------------------------------------------------------------------------------------|
| CETP     | Cholesteryl Ester Transfer Protein                         | Protein Coding | 47 | GC16P056961 | 35.55682 | <a href="https://www.genecards.org/cgi-bin/carddisp.pl?gene=CETP">https://www.genecards.org/cgi-bin/carddisp.pl?gene=CETP</a>         |
| ENG      | Endoglin                                                   | Protein Coding | 47 | GC09M127815 | 35.49092 | <a href="https://www.genecards.org/cgi-bin/carddisp.pl?gene=ENG">https://www.genecards.org/cgi-bin/carddisp.pl?gene=ENG</a>           |
| NCF2     | Neutrophil Cytosolic Factor 2                              | Protein Coding | 48 | GC01M183555 | 35.40974 | <a href="https://www.genecards.org/cgi-bin/carddisp.pl?gene=NCF2">https://www.genecards.org/cgi-bin/carddisp.pl?gene=NCF2</a>         |
| ELOVL6   | ELOVL Fatty Acid Elongase 6                                | Protein Coding | 41 | GC04M110045 | 35.40345 | <a href="https://www.genecards.org/cgi-bin/carddisp.pl?gene=ELOVL6">https://www.genecards.org/cgi-bin/carddisp.pl?gene=ELOVL6</a>     |
| TIMP1    | TIMP Metalloproteinase Inhibitor 1                         | Protein Coding | 45 | GC0XP047583 | 35.38219 | <a href="https://www.genecards.org/cgi-bin/carddisp.pl?gene=TIMP1">https://www.genecards.org/cgi-bin/carddisp.pl?gene=TIMP1</a>       |
| PRKAG2   | Protein Kinase AMP-Activated Non-Catalytic Subunit Gamma 2 | Protein Coding | 51 | GC07M151556 | 35.34998 | <a href="https://www.genecards.org/cgi-bin/carddisp.pl?gene=PRKAG2">https://www.genecards.org/cgi-bin/carddisp.pl?gene=PRKAG2</a>     |
| SIRT1    | Sirtuin 1                                                  | Protein Coding | 50 | GC10P067884 | 35.17909 | <a href="https://www.genecards.org/cgi-bin/carddisp.pl?gene=SIRT1">https://www.genecards.org/cgi-bin/carddisp.pl?gene=SIRT1</a>       |
| BCKDHB   | Branched Chain Keto Acid Dehydrogenase E1 Subunit Beta     | Protein Coding | 44 | GC06P080106 | 35.14046 | <a href="https://www.genecards.org/cgi-bin/carddisp.pl?gene=BCKDHB">https://www.genecards.org/cgi-bin/carddisp.pl?gene=BCKDHB</a>     |
| LAMP2    | Lysosomal Associated Membrane Protein 2                    | Protein Coding | 45 | GC0XM120426 | 35.11869 | <a href="https://www.genecards.org/cgi-bin/carddisp.pl?gene=LAMP2">https://www.genecards.org/cgi-bin/carddisp.pl?gene=LAMP2</a>       |
| JUN      | Jun Proto-Oncogene, AP-1 Transcription Factor Subunit      | Protein Coding | 50 | GC01M058780 | 35.06437 | <a href="https://www.genecards.org/cgi-bin/carddisp.pl?gene=JUN">https://www.genecards.org/cgi-bin/carddisp.pl?gene=JUN</a>           |
| APBB1    | Amyloid Beta Precursor Protein Binding Family B Member 1   | Protein Coding | 44 | GC11M006396 | 35.02167 | <a href="https://www.genecards.org/cgi-bin/carddisp.pl?gene=APBB1">https://www.genecards.org/cgi-bin/carddisp.pl?gene=APBB1</a>       |
| ACADS    | Acyl-CoA Dehydrogenase Short Chain ATP Binding             | Protein Coding | 47 | GC12P120922 | 34.95808 | <a href="https://www.genecards.org/cgi-bin/carddisp.pl?gene=ACADS">https://www.genecards.org/cgi-bin/carddisp.pl?gene=ACADS</a>       |
| ABCG5    | Cassette Subfamily G Member 5                              | Protein Coding | 45 | GC02M043806 | 34.94785 | <a href="https://www.genecards.org/cgi-bin/carddisp.pl?gene=ABCG5">https://www.genecards.org/cgi-bin/carddisp.pl?gene=ABCG5</a>       |
| MIR93    | MicroRNA 93                                                | RNA Gene       | 20 | GC07M100467 | 34.85299 | <a href="https://www.genecards.org/cgi-bin/carddisp.pl?gene=MIR93">https://www.genecards.org/cgi-bin/carddisp.pl?gene=MIR93</a>       |
| MMP2     | Matrix Metalloproteinase 2                                 | Protein Coding | 54 | GC16P055390 | 34.79349 | <a href="https://www.genecards.org/cgi-bin/carddisp.pl?gene=MMP2">https://www.genecards.org/cgi-bin/carddisp.pl?gene=MMP2</a>         |
| MIR181A1 | MicroRNA 181a-1                                            | RNA Gene       | 19 | GC01M198860 | 34.78139 | <a href="https://www.genecards.org/cgi-bin/carddisp.pl?gene=MIR181A1">https://www.genecards.org/cgi-bin/carddisp.pl?gene=MIR181A1</a> |
| UMOD     | Uromodulin                                                 | Protein Coding | 43 | GC16M020344 | 34.75622 | <a href="https://www.genecards.org/cgi-bin/carddisp.pl?gene=UMOD">https://www.genecards.org/cgi-bin/carddisp.pl?gene=UMOD</a>         |

|          |                                                        |                |    |             |          |                                                                                                                                       |
|----------|--------------------------------------------------------|----------------|----|-------------|----------|---------------------------------------------------------------------------------------------------------------------------------------|
| NF1      | Neurofibromin 1                                        | Protein Coding | 50 | GC17P031094 | 34.75281 | <a href="https://www.genecards.org/cgi-bin/carddisp.pl?gene=NF1">https://www.genecards.org/cgi-bin/carddisp.pl?gene=NF1</a>           |
| PLAU     | Plasminogen Activator, Urokinase                       | Protein Coding | 52 | GC10P073909 | 34.50766 | <a href="https://www.genecards.org/cgi-bin/carddisp.pl?gene=PLAU">https://www.genecards.org/cgi-bin/carddisp.pl?gene=PLAU</a>         |
| MKS1     | MKS Transition Zone Complex Subunit 1                  | Protein Coding | 41 | GC17M058205 | 34.48266 | <a href="https://www.genecards.org/cgi-bin/carddisp.pl?gene=MKS1">https://www.genecards.org/cgi-bin/carddisp.pl?gene=MKS1</a>         |
| NOS2     | Nitric Oxide Synthase 2                                | Protein Coding | 50 | GC17M027756 | 34.44846 | <a href="https://www.genecards.org/cgi-bin/carddisp.pl?gene=NOS2">https://www.genecards.org/cgi-bin/carddisp.pl?gene=NOS2</a>         |
| FOS      | Fos Proto-Oncogene, AP-1 Transcription Factor Subunit  | Protein Coding | 51 | GC14P075278 | 34.42918 | <a href="https://www.genecards.org/cgi-bin/carddisp.pl?gene=FOS">https://www.genecards.org/cgi-bin/carddisp.pl?gene=FOS</a>           |
| DGAT1    | Diacylglycerol O-Acyltransferase 1                     | Protein Coding | 47 | GC08M144316 | 34.414   | <a href="https://www.genecards.org/cgi-bin/carddisp.pl?gene=DGAT1">https://www.genecards.org/cgi-bin/carddisp.pl?gene=DGAT1</a>       |
| MIR132   | MicroRNA 132                                           | RNA Gene       | 21 | GC17M002049 | 34.38493 | <a href="https://www.genecards.org/cgi-bin/carddisp.pl?gene=MIR132">https://www.genecards.org/cgi-bin/carddisp.pl?gene=MIR132</a>     |
| CCR6     | C-C Motif Chemokine Receptor 6                         | Protein Coding | 45 | GC06P167111 | 34.2535  | <a href="https://www.genecards.org/cgi-bin/carddisp.pl?gene=CCR6">https://www.genecards.org/cgi-bin/carddisp.pl?gene=CCR6</a>         |
| SPINK1   | Serine Peptidase Inhibitor Kazal Type 1                | Protein Coding | 44 | GC05M147825 | 34.21467 | <a href="https://www.genecards.org/cgi-bin/carddisp.pl?gene=SPINK1">https://www.genecards.org/cgi-bin/carddisp.pl?gene=SPINK1</a>     |
| SURF1    | SURF1 Cytochrome C Oxidase Assembly Factor             | Protein Coding | 44 | GC09M133351 | 34.18819 | <a href="https://www.genecards.org/cgi-bin/carddisp.pl?gene=SURF1">https://www.genecards.org/cgi-bin/carddisp.pl?gene=SURF1</a>       |
| CYCS     | Cytochrome C, Somatic                                  | Protein Coding | 49 | GC07M025118 | 34.18287 | <a href="https://www.genecards.org/cgi-bin/carddisp.pl?gene=CYCS">https://www.genecards.org/cgi-bin/carddisp.pl?gene=CYCS</a>         |
| EGR2     | Early Growth Response 2                                | Protein Coding | 44 | GC10M062811 | 34.15501 | <a href="https://www.genecards.org/cgi-bin/carddisp.pl?gene=EGR2">https://www.genecards.org/cgi-bin/carddisp.pl?gene=EGR2</a>         |
| HLA-DQA1 | Major Histocompatibility Complex, Class II, DQ Alpha 1 | Protein Coding | 43 | GC06P055231 | 34.0709  | <a href="https://www.genecards.org/cgi-bin/carddisp.pl?gene=HLA-DQA1">https://www.genecards.org/cgi-bin/carddisp.pl?gene=HLA-DQA1</a> |
| GATA4    | GATA Binding Protein 4                                 | Protein Coding | 49 | GC08P011676 | 34.07054 | <a href="https://www.genecards.org/cgi-bin/carddisp.pl?gene=GATA4">https://www.genecards.org/cgi-bin/carddisp.pl?gene=GATA4</a>       |
| AXIN1    | Axin 1                                                 | Protein Coding | 47 | GC16M000287 | 33.70123 | <a href="https://www.genecards.org/cgi-bin/carddisp.pl?gene=AXIN1">https://www.genecards.org/cgi-bin/carddisp.pl?gene=AXIN1</a>       |
| COL4A1   | Collagen Type IV Alpha 1 Chain                         | Protein Coding | 49 | GC13M110148 | 33.69635 | <a href="https://www.genecards.org/cgi-bin/carddisp.pl?gene=COL4A1">https://www.genecards.org/cgi-bin/carddisp.pl?gene=COL4A1</a>     |
| ADH6     | Alcohol Dehydrogenase 6 (Class V)                      | Protein Coding | 41 | GC04M099202 | 33.63883 | <a href="https://www.genecards.org/cgi-bin/carddisp.pl?gene=ADH6">https://www.genecards.org/cgi-bin/carddisp.pl?gene=ADH6</a>         |
| NPHP3    | Nephrocystin 3                                         | Protein Coding | 39 | GC03M132683 | 33.61153 | <a href="https://www.genecards.org/cgi-bin/carddisp.pl?gene=NPHP3">https://www.genecards.org/cgi-bin/carddisp.pl?gene=NPHP3</a>       |
| NDRG1    | N-Myc Downstream Regulated 1                           | Protein Coding | 45 | GC08M133237 | 33.60076 | <a href="https://www.genecards.org/cgi-bin/carddisp.pl?gene=NDRG1">https://www.genecards.org/cgi-bin/carddisp.pl?gene=NDRG1</a>       |

|           |                                                 |                |    |             |          |                                                                                                                                         |
|-----------|-------------------------------------------------|----------------|----|-------------|----------|-----------------------------------------------------------------------------------------------------------------------------------------|
| APOA5     | Apolipoprotein A5<br>Cyclin                     | Protein Coding | 45 | GC11M116789 | 33.56956 | <a href="https://www.genecards.org/cgi-bin/carddisp.pl?gene=APOA5">https://www.genecards.org/cgi-bin/carddisp.pl?gene=APOA5</a>         |
| CDKN3     | Dependent Kinase Inhibitor 3<br>Nuclear         | Protein Coding | 43 | GC14P054398 | 33.56842 | <a href="https://www.genecards.org/cgi-bin/carddisp.pl?gene=CDKN3">https://www.genecards.org/cgi-bin/carddisp.pl?gene=CDKN3</a>         |
| NR1H2     | Receptor Subfamily 1 Group H Member 2           | Protein Coding | 49 | GC19P050329 | 33.50757 | <a href="https://www.genecards.org/cgi-bin/carddisp.pl?gene=NR1H2">https://www.genecards.org/cgi-bin/carddisp.pl?gene=NR1H2</a>         |
| TNFRSF11A | TNF Receptor Superfamily Member 11a             | Protein Coding | 46 | GC18P062325 | 33.47861 | <a href="https://www.genecards.org/cgi-bin/carddisp.pl?gene=TNFRSF11A">https://www.genecards.org/cgi-bin/carddisp.pl?gene=TNFRSF11A</a> |
| ATM       | ATM Serine/Threonine Kinase                     | Protein Coding | 54 | GC11P108222 | 33.46486 | <a href="https://www.genecards.org/cgi-bin/carddisp.pl?gene=ATM">https://www.genecards.org/cgi-bin/carddisp.pl?gene=ATM</a>             |
| MIR127    | MicroRNA 127                                    | RNA Gene       | 20 | GC14P105976 | 33.43264 | <a href="https://www.genecards.org/cgi-bin/carddisp.pl?gene=MIR127">https://www.genecards.org/cgi-bin/carddisp.pl?gene=MIR127</a>       |
| XBP1      | X-Box Binding Protein 1                         | Protein Coding | 46 | GC22M028794 | 33.30799 | <a href="https://www.genecards.org/cgi-bin/carddisp.pl?gene=XBP1">https://www.genecards.org/cgi-bin/carddisp.pl?gene=XBP1</a>           |
| CASR      | Calcium Sensing Receptor                        | Protein Coding | 51 | GC03P122183 | 33.3078  | <a href="https://www.genecards.org/cgi-bin/carddisp.pl?gene=CASR">https://www.genecards.org/cgi-bin/carddisp.pl?gene=CASR</a>           |
| FGFR1     | Fibroblast Growth Factor Receptor 1             | Protein Coding | 55 | GC08M038400 | 33.30003 | <a href="https://www.genecards.org/cgi-bin/carddisp.pl?gene=FGFR1">https://www.genecards.org/cgi-bin/carddisp.pl?gene=FGFR1</a>         |
| IL17A     | Interleukin 17A                                 | Protein Coding | 43 | GC06P052186 | 33.21131 | <a href="https://www.genecards.org/cgi-bin/carddisp.pl?gene=IL17A">https://www.genecards.org/cgi-bin/carddisp.pl?gene=IL17A</a>         |
| POMC      | Proopiomelanocortin                             | Protein Coding | 48 | GC02M025160 | 33.12635 | <a href="https://www.genecards.org/cgi-bin/carddisp.pl?gene=POMC">https://www.genecards.org/cgi-bin/carddisp.pl?gene=POMC</a>           |
| CTSD      | Cathepsin D                                     | Protein Coding | 52 | GC11M001752 | 33.0695  | <a href="https://www.genecards.org/cgi-bin/carddisp.pl?gene=CTSD">https://www.genecards.org/cgi-bin/carddisp.pl?gene=CTSD</a>           |
| FABP5     | Fatty Acid Binding Protein 5                    | Protein Coding | 42 | GC08P081282 | 33.02143 | <a href="https://www.genecards.org/cgi-bin/carddisp.pl?gene=FABP5">https://www.genecards.org/cgi-bin/carddisp.pl?gene=FABP5</a>         |
| GATA3     | GATA Binding Protein 3                          | Protein Coding | 50 | GC10P008045 | 33.00939 | <a href="https://www.genecards.org/cgi-bin/carddisp.pl?gene=GATA3">https://www.genecards.org/cgi-bin/carddisp.pl?gene=GATA3</a>         |
| TNFRSF11B | TNF Receptor Superfamily Member 11b             | Protein Coding | 48 | GC08M118923 | 32.85939 | <a href="https://www.genecards.org/cgi-bin/carddisp.pl?gene=TNFRSF11B">https://www.genecards.org/cgi-bin/carddisp.pl?gene=TNFRSF11B</a> |
| PEX14     | Peroxisomal Biogenesis Factor 14                | Protein Coding | 44 | GC01P010472 | 32.81486 | <a href="https://www.genecards.org/cgi-bin/carddisp.pl?gene=PEX14">https://www.genecards.org/cgi-bin/carddisp.pl?gene=PEX14</a>         |
| TWINK     | Twinkle MtDNA Helicase                          | Protein Coding | 34 | GC10P100993 | 32.79261 | <a href="https://www.genecards.org/cgi-bin/carddisp.pl?gene=TWINK">https://www.genecards.org/cgi-bin/carddisp.pl?gene=TWINK</a>         |
| FABP12    | Fatty Acid Binding Protein 12                   | Protein Coding | 32 | GC08M081524 | 32.77424 | <a href="https://www.genecards.org/cgi-bin/carddisp.pl?gene=FABP12">https://www.genecards.org/cgi-bin/carddisp.pl?gene=FABP12</a>       |
| GALC      | Galactosylceramidase                            | Protein Coding | 44 | GC14M087837 | 32.75415 | <a href="https://www.genecards.org/cgi-bin/carddisp.pl?gene=GALC">https://www.genecards.org/cgi-bin/carddisp.pl?gene=GALC</a>           |
| DBT       | Dihydrolipoamide Branched Chain Transacylase E2 | Protein Coding | 43 | GC01M100186 | 32.73995 | <a href="https://www.genecards.org/cgi-bin/carddisp.pl?gene=DBT">https://www.genecards.org/cgi-bin/carddisp.pl?gene=DBT</a>             |

|         |                                                |                |    |             |          |                                                                                                                                     |
|---------|------------------------------------------------|----------------|----|-------------|----------|-------------------------------------------------------------------------------------------------------------------------------------|
| MT-CO1  | Mitochondrially Encoded Cytochrome C Oxidase I | Protein Coding | 34 | GCMTPO05906 | 32.7396  | <a href="https://www.genecards.org/cgi-bin/carddisp.pl?gene=MT-CO1">https://www.genecards.org/cgi-bin/carddisp.pl?gene=MT-CO1</a>   |
| FOXP3   | Forkhead Box P3                                | Protein Coding | 47 | GC0XM049250 | 32.71606 | <a href="https://www.genecards.org/cgi-bin/carddisp.pl?gene=FOXP3">https://www.genecards.org/cgi-bin/carddisp.pl?gene=FOXP3</a>     |
| MIR195  | MicroRNA 195                                   | RNA Gene       | 19 | GC17M007018 | 32.6982  | <a href="https://www.genecards.org/cgi-bin/carddisp.pl?gene=MIR195">https://www.genecards.org/cgi-bin/carddisp.pl?gene=MIR195</a>   |
| CES1    | Carboxylesterase 1                             | Protein Coding | 47 | GC16M055836 | 32.63636 | <a href="https://www.genecards.org/cgi-bin/carddisp.pl?gene=CES1">https://www.genecards.org/cgi-bin/carddisp.pl?gene=CES1</a>       |
| GHRL    | Ghrelin And Obestatin Prepropeptide            | Protein Coding | 44 | GC03M010285 | 32.62742 | <a href="https://www.genecards.org/cgi-bin/carddisp.pl?gene=GHRL">https://www.genecards.org/cgi-bin/carddisp.pl?gene=GHRL</a>       |
| MEFV    | Immunity Regulator, Pyrin                      | Protein Coding | 44 | GC16M003757 | 32.57311 | <a href="https://www.genecards.org/cgi-bin/carddisp.pl?gene=MEFV">https://www.genecards.org/cgi-bin/carddisp.pl?gene=MEFV</a>       |
| GCK     | Glucokinase                                    | Protein Coding | 51 | GC07M044154 | 32.55552 | <a href="https://www.genecards.org/cgi-bin/carddisp.pl?gene=GCK">https://www.genecards.org/cgi-bin/carddisp.pl?gene=GCK</a>         |
| ABCG8   | ATP Binding Cassette Subfamily G Member 8      | Protein Coding | 43 | GC02P043828 | 32.51627 | <a href="https://www.genecards.org/cgi-bin/carddisp.pl?gene=ABCG8">https://www.genecards.org/cgi-bin/carddisp.pl?gene=ABCG8</a>     |
| ADIPOR1 | Adiponectin Receptor 1                         | Protein Coding | 45 | GC01M202940 | 32.46071 | <a href="https://www.genecards.org/cgi-bin/carddisp.pl?gene=ADIPOR1">https://www.genecards.org/cgi-bin/carddisp.pl?gene=ADIPOR1</a> |
| ACSL4   | Acyl-CoA Synthetase Long Chain Family Member 4 | Protein Coding | 45 | GC0XM109624 | 32.41319 | <a href="https://www.genecards.org/cgi-bin/carddisp.pl?gene=ACSL4">https://www.genecards.org/cgi-bin/carddisp.pl?gene=ACSL4</a>     |
| AGTR1   | Angiotensin II Receptor Type 1                 | Protein Coding | 51 | GC03P148697 | 32.31946 | <a href="https://www.genecards.org/cgi-bin/carddisp.pl?gene=AGTR1">https://www.genecards.org/cgi-bin/carddisp.pl?gene=AGTR1</a>     |
| ASPA    | Aspartoacylase                                 | Protein Coding | 45 | GC17P003472 | 32.30996 | <a href="https://www.genecards.org/cgi-bin/carddisp.pl?gene=ASPA">https://www.genecards.org/cgi-bin/carddisp.pl?gene=ASPA</a>       |
| LITAF   | Lipopolysaccharide Induced TNF Factor          | Protein Coding | 45 | GC16M011547 | 32.28507 | <a href="https://www.genecards.org/cgi-bin/carddisp.pl?gene=LITAF">https://www.genecards.org/cgi-bin/carddisp.pl?gene=LITAF</a>     |
| SOX10   | SRY-Box Transcription Factor 10                | Protein Coding | 46 | GC22M049686 | 32.20561 | <a href="https://www.genecards.org/cgi-bin/carddisp.pl?gene=SOX10">https://www.genecards.org/cgi-bin/carddisp.pl?gene=SOX10</a>     |
| NRAS    | NRAS Proto-Oncogene, GTPase                    | Protein Coding | 50 | GC01M114704 | 32.20041 | <a href="https://www.genecards.org/cgi-bin/carddisp.pl?gene=NRAS">https://www.genecards.org/cgi-bin/carddisp.pl?gene=NRAS</a>       |
| DLD     | Dihydrolipoamide Dehydrogenase                 | Protein Coding | 51 | GC07P107890 | 32.18312 | <a href="https://www.genecards.org/cgi-bin/carddisp.pl?gene=DLD">https://www.genecards.org/cgi-bin/carddisp.pl?gene=DLD</a>         |
| IFNA1   | Interferon Alpha 1                             | Protein Coding | 40 | GC09P021522 | 32.13412 | <a href="https://www.genecards.org/cgi-bin/carddisp.pl?gene=IFNA1">https://www.genecards.org/cgi-bin/carddisp.pl?gene=IFNA1</a>     |
| MIR18A  | MicroRNA 18a                                   | RNA Gene       | 18 | GC13P091464 | 32.11747 | <a href="https://www.genecards.org/cgi-bin/carddisp.pl?gene=MIR18A">https://www.genecards.org/cgi-bin/carddisp.pl?gene=MIR18A</a>   |
| EPO     | Erythropoietin                                 | Protein Coding | 41 | GC07P100720 | 32.09436 | <a href="https://www.genecards.org/cgi-bin/carddisp.pl?gene=EPO">https://www.genecards.org/cgi-bin/carddisp.pl?gene=EPO</a>         |
| MIR29C  | MicroRNA 29c                                   | RNA Gene       | 18 | GC01M207802 | 32.09364 | <a href="https://www.genecards.org/cgi-bin/carddisp.pl?gene=MIR29C">https://www.genecards.org/cgi-bin/carddisp.pl?gene=MIR29C</a>   |
| VDR     | Vitamin D Receptor                             | Protein Coding | 52 | GC12M047841 | 32.08536 | <a href="https://www.genecards.org/cgi-bin/carddisp.pl?gene=VDR">https://www.genecards.org/cgi-bin/carddisp.pl?gene=VDR</a>         |

|         |                                                |                |    |              |          |                                                                                                                                     |
|---------|------------------------------------------------|----------------|----|--------------|----------|-------------------------------------------------------------------------------------------------------------------------------------|
| MT-CYB  | Mitochondrially Encoded Cytochrome B           | Protein Coding | 32 | GCMTTP014749 | 32.04627 | <a href="https://www.genecards.org/cgi-bin/carddisp.pl?gene=MT-CYB">https://www.genecards.org/cgi-bin/carddisp.pl?gene=MT-CYB</a>   |
| TARDBP  | TAR DNA Binding Protein                        | Protein Coding | 47 | GC01P011013  | 32.02393 | <a href="https://www.genecards.org/cgi-bin/carddisp.pl?gene=TARDBP">https://www.genecards.org/cgi-bin/carddisp.pl?gene=TARDBP</a>   |
| GNAS    | GNAS Complex Locus                             | Protein Coding | 51 | GC20P058839  | 31.99583 | <a href="https://www.genecards.org/cgi-bin/carddisp.pl?gene=GNAS">https://www.genecards.org/cgi-bin/carddisp.pl?gene=GNAS</a>       |
| ADAM17  | ADAM Metallopeptidase Domain 17                | Protein Coding | 51 | GC02M009488  | 31.8755  | <a href="https://www.genecards.org/cgi-bin/carddisp.pl?gene=ADAM17">https://www.genecards.org/cgi-bin/carddisp.pl?gene=ADAM17</a>   |
| IL2RA   | Interleukin 2 Receptor Subunit Alpha           | Protein Coding | 51 | GC10M006010  | 31.87153 | <a href="https://www.genecards.org/cgi-bin/carddisp.pl?gene=IL2RA">https://www.genecards.org/cgi-bin/carddisp.pl?gene=IL2RA</a>     |
| SCN5A   | Sodium Voltage-Gated Channel Alpha Subunit 5   | Protein Coding | 51 | GC03M038549  | 31.8436  | <a href="https://www.genecards.org/cgi-bin/carddisp.pl?gene=SCN5A">https://www.genecards.org/cgi-bin/carddisp.pl?gene=SCN5A</a>     |
| CD4     | CD4 Molecule                                   | Protein Coding | 50 | GC12P006786  | 31.80013 | <a href="https://www.genecards.org/cgi-bin/carddisp.pl?gene=CD4">https://www.genecards.org/cgi-bin/carddisp.pl?gene=CD4</a>         |
| CYP2A6  | Cytochrome P450 Family 2 Subfamily A Member 6  | Protein Coding | 48 | GC19M040843  | 31.79175 | <a href="https://www.genecards.org/cgi-bin/carddisp.pl?gene=CYP2A6">https://www.genecards.org/cgi-bin/carddisp.pl?gene=CYP2A6</a>   |
| HEXB    | Hexosaminidase Subunit Beta                    | Protein Coding | 48 | GC05P074640  | 31.7232  | <a href="https://www.genecards.org/cgi-bin/carddisp.pl?gene=HEXB">https://www.genecards.org/cgi-bin/carddisp.pl?gene=HEXB</a>       |
| ADIPOR2 | Adiponectin Receptor 2                         | Protein Coding | 43 | GC12P001670  | 31.68838 | <a href="https://www.genecards.org/cgi-bin/carddisp.pl?gene=ADIPOR2">https://www.genecards.org/cgi-bin/carddisp.pl?gene=ADIPOR2</a> |
| DDIT3   | DNA Damage Inducible Transcript 3              | Protein Coding | 46 | GC12M057516  | 31.68555 | <a href="https://www.genecards.org/cgi-bin/carddisp.pl?gene=DDIT3">https://www.genecards.org/cgi-bin/carddisp.pl?gene=DDIT3</a>     |
| SST     | Somatostatin                                   | Protein Coding | 43 | GC03M187668  | 31.66714 | <a href="https://www.genecards.org/cgi-bin/carddisp.pl?gene=SST">https://www.genecards.org/cgi-bin/carddisp.pl?gene=SST</a>         |
| MIR25   | MicroRNA 25                                    | RNA Gene       | 20 | GC07M100093  | 31.64085 | <a href="https://www.genecards.org/cgi-bin/carddisp.pl?gene=MIR25">https://www.genecards.org/cgi-bin/carddisp.pl?gene=MIR25</a>     |
| WDR19   | WD Repeat Domain 19                            | Protein Coding | 38 | GC04P039184  | 31.60878 | <a href="https://www.genecards.org/cgi-bin/carddisp.pl?gene=WDR19">https://www.genecards.org/cgi-bin/carddisp.pl?gene=WDR19</a>     |
| SLC40A1 | Solute Carrier Family 40 Member 1              | Protein Coding | 47 | GC02M189560  | 31.59604 | <a href="https://www.genecards.org/cgi-bin/carddisp.pl?gene=SLC40A1">https://www.genecards.org/cgi-bin/carddisp.pl?gene=SLC40A1</a> |
| PIK3R1  | Phosphoinositide-3-Kinase Regulatory Subunit 1 | Protein Coding | 51 | GC05P068215  | 31.52237 | <a href="https://www.genecards.org/cgi-bin/carddisp.pl?gene=PIK3R1">https://www.genecards.org/cgi-bin/carddisp.pl?gene=PIK3R1</a>   |
| FAR2    | Fatty Acyl-CoA Reductase 2                     | Protein Coding | 40 | GC12P029145  | 31.47194 | <a href="https://www.genecards.org/cgi-bin/carddisp.pl?gene=FAR2">https://www.genecards.org/cgi-bin/carddisp.pl?gene=FAR2</a>       |
| MIR145  | MicroRNA 145                                   | RNA Gene       | 22 | GC05P149430  | 31.41011 | <a href="https://www.genecards.org/cgi-bin/carddisp.pl?gene=MIR145">https://www.genecards.org/cgi-bin/carddisp.pl?gene=MIR145</a>   |
| NCF1    | Neutrophil Cytosolic Factor 1                  | Protein Coding | 49 | GC07P074773  | 31.40522 | <a href="https://www.genecards.org/cgi-bin/carddisp.pl?gene=NCF1">https://www.genecards.org/cgi-bin/carddisp.pl?gene=NCF1</a>       |
| MPV17   | Mitochondrial Inner Membrane Protein MPV17     | Protein Coding | 42 | GC02M027309  | 31.37327 | <a href="https://www.genecards.org/cgi-bin/carddisp.pl?gene=MPV17">https://www.genecards.org/cgi-bin/carddisp.pl?gene=MPV17</a>     |
| INF2    | Inverted Formin 2                              | Protein Coding | 41 | GC14P106060  | 31.37173 | <a href="https://www.genecards.org/cgi-bin/carddisp.pl?gene=INF2">https://www.genecards.org/cgi-bin/carddisp.pl?gene=INF2</a>       |

|         |                                                            |                |    |              |          |                                                                                                                                     |
|---------|------------------------------------------------------------|----------------|----|--------------|----------|-------------------------------------------------------------------------------------------------------------------------------------|
| MT-TL1  | Mitochondrially Encoded TRNA-Leu (UUA/G) 1                 | RNA Gene       | 15 | GCMTTP003232 | 31.30286 | <a href="https://www.genecards.org/cgi-bin/carddisp.pl?gene=MT-TL1">https://www.genecards.org/cgi-bin/carddisp.pl?gene=MT-TL1</a>   |
| MIR140  | MicroRNA 140                                               | RNA Gene       | 22 | GC16P069934  | 31.29485 | <a href="https://www.genecards.org/cgi-bin/carddisp.pl?gene=MIR140">https://www.genecards.org/cgi-bin/carddisp.pl?gene=MIR140</a>   |
| COL1A1  | Collagen Type I Alpha 1 Chain                              | Protein Coding | 51 | GC17M050183  | 31.25345 | <a href="https://www.genecards.org/cgi-bin/carddisp.pl?gene=COL1A1">https://www.genecards.org/cgi-bin/carddisp.pl?gene=COL1A1</a>   |
| ENPP1   | Ectonucleotide Pyrophosphatase/Phosphodiesterase 1         | Protein Coding | 48 | GC06P131808  | 31.24789 | <a href="https://www.genecards.org/cgi-bin/carddisp.pl?gene=ENPP1">https://www.genecards.org/cgi-bin/carddisp.pl?gene=ENPP1</a>     |
| SLCO1B1 | Solute Carrier Organic Anion Transporter Family Member 1B1 | Protein Coding | 48 | GC12P021132  | 31.18969 | <a href="https://www.genecards.org/cgi-bin/carddisp.pl?gene=SLCO1B1">https://www.genecards.org/cgi-bin/carddisp.pl?gene=SLCO1B1</a> |
| MIR107  | MicroRNA 107                                               | RNA Gene       | 19 | GC10M089600  | 31.17746 | <a href="https://www.genecards.org/cgi-bin/carddisp.pl?gene=MIR107">https://www.genecards.org/cgi-bin/carddisp.pl?gene=MIR107</a>   |
| MBL2    | Mannose Binding Lectin 2                                   | Protein Coding | 48 | GC10M052760  | 31.10712 | <a href="https://www.genecards.org/cgi-bin/carddisp.pl?gene=MBL2">https://www.genecards.org/cgi-bin/carddisp.pl?gene=MBL2</a>       |
| SCP2    | Sterol Carrier Protein 2                                   | Protein Coding | 48 | GC01P052927  | 31.07189 | <a href="https://www.genecards.org/cgi-bin/carddisp.pl?gene=SCP2">https://www.genecards.org/cgi-bin/carddisp.pl?gene=SCP2</a>       |
| NDUFS1  | NADH:Ubiquinone Oxidoreductase Core Subunit S1             | Protein Coding | 47 | GC02M206114  | 31.05576 | <a href="https://www.genecards.org/cgi-bin/carddisp.pl?gene=NDUFS1">https://www.genecards.org/cgi-bin/carddisp.pl?gene=NDUFS1</a>   |
| MIR210  | MicroRNA 210                                               | RNA Gene       | 21 | GC11M001082  | 31.01629 | <a href="https://www.genecards.org/cgi-bin/carddisp.pl?gene=MIR210">https://www.genecards.org/cgi-bin/carddisp.pl?gene=MIR210</a>   |
| ALPL    | Alkaline Phosphatase, Biomimetic Association               | Protein Coding | 51 | GC01P021508  | 30.99582 | <a href="https://www.genecards.org/cgi-bin/carddisp.pl?gene=ALPL">https://www.genecards.org/cgi-bin/carddisp.pl?gene=ALPL</a>       |
| SYNJ1   | Synaptojanin 1                                             | Protein Coding | 46 | GC21M032628  | 30.95378 | <a href="https://www.genecards.org/cgi-bin/carddisp.pl?gene=SYNJ1">https://www.genecards.org/cgi-bin/carddisp.pl?gene=SYNJ1</a>     |
| CLN3    | CLN3 Lysosomal/Endosomal Transmembrane Protein, Battenin   | Protein Coding | 45 | GC16M028466  | 30.94835 | <a href="https://www.genecards.org/cgi-bin/carddisp.pl?gene=CLN3">https://www.genecards.org/cgi-bin/carddisp.pl?gene=CLN3</a>       |
| CAV3    | Caveolin 3                                                 | Protein Coding | 44 | GC03P008733  | 30.93867 | <a href="https://www.genecards.org/cgi-bin/carddisp.pl?gene=CAV3">https://www.genecards.org/cgi-bin/carddisp.pl?gene=CAV3</a>       |
| GUSB    | Glucuronidase Beta                                         | Protein Coding | 48 | GC07M065960  | 30.9182  | <a href="https://www.genecards.org/cgi-bin/carddisp.pl?gene=GUSB">https://www.genecards.org/cgi-bin/carddisp.pl?gene=GUSB</a>       |
| CD40LG  | CD40 Ligand                                                | Protein Coding | 48 | GC0XP136649  | 30.87214 | <a href="https://www.genecards.org/cgi-bin/carddisp.pl?gene=CD40LG">https://www.genecards.org/cgi-bin/carddisp.pl?gene=CD40LG</a>   |
| PEMT    | Phosphatidylethanolamine N-Methyltransferase               | Protein Coding | 41 | GC17M017506  | 30.86824 | <a href="https://www.genecards.org/cgi-bin/carddisp.pl?gene=PEMT">https://www.genecards.org/cgi-bin/carddisp.pl?gene=PEMT</a>       |



|          |                                                                              |                |    |             |          |                                                                                                                                       |
|----------|------------------------------------------------------------------------------|----------------|----|-------------|----------|---------------------------------------------------------------------------------------------------------------------------------------|
| HSD3B7   | Hydroxy-Delta-5-Steroid Dehydrogenase, 3 Beta- And Steroid Delta-Isomerase 7 | Protein Coding | 43 | GC16P030985 | 30.8208  | <a href="https://www.genecards.org/cgi-bin/carddisp.pl?gene=HSD3B7">https://www.genecards.org/cgi-bin/carddisp.pl?gene=HSD3B7</a>     |
| TH       | Tyrosine Hydroxylase                                                         | Protein Coding | 52 | GC11M002163 | 30.81452 | <a href="https://www.genecards.org/cgi-bin/carddisp.pl?gene=TH">https://www.genecards.org/cgi-bin/carddisp.pl?gene=TH</a>             |
| EDN3     | Endothelin 3                                                                 | Protein Coding | 47 | GC20P059300 | 30.8041  | <a href="https://www.genecards.org/cgi-bin/carddisp.pl?gene=EDN3">https://www.genecards.org/cgi-bin/carddisp.pl?gene=EDN3</a>         |
| SLC27A2  | Solute Carrier Family 27 Member 2                                            | Protein Coding | 46 | GC15P050182 | 30.7966  | <a href="https://www.genecards.org/cgi-bin/carddisp.pl?gene=SLC27A2">https://www.genecards.org/cgi-bin/carddisp.pl?gene=SLC27A2</a>   |
| MTMR2    | Myotubularin Related Protein 2                                               | Protein Coding | 44 | GC11M095822 | 30.78401 | <a href="https://www.genecards.org/cgi-bin/carddisp.pl?gene=MTMR2">https://www.genecards.org/cgi-bin/carddisp.pl?gene=MTMR2</a>       |
| MIR181B1 | MicroRNA 181b-1                                                              | RNA Gene       | 19 | GC01M198858 | 30.75272 | <a href="https://www.genecards.org/cgi-bin/carddisp.pl?gene=MIR181B1">https://www.genecards.org/cgi-bin/carddisp.pl?gene=MIR181B1</a> |
| GCKR     | Glucokinase Regulator                                                        | Protein Coding | 42 | GC02P027496 | 30.66492 | <a href="https://www.genecards.org/cgi-bin/carddisp.pl?gene=GCKR">https://www.genecards.org/cgi-bin/carddisp.pl?gene=GCKR</a>         |
| IL12RB1  | Interleukin 12 Receptor Subunit Beta 1                                       | Protein Coding | 45 | GC19M018058 | 30.66179 | <a href="https://www.genecards.org/cgi-bin/carddisp.pl?gene=IL12RB1">https://www.genecards.org/cgi-bin/carddisp.pl?gene=IL12RB1</a>   |
| SMAD3    | SMAD Family Member 3                                                         | Protein Coding | 50 | GC15P067063 | 30.63283 | <a href="https://www.genecards.org/cgi-bin/carddisp.pl?gene=SMAD3">https://www.genecards.org/cgi-bin/carddisp.pl?gene=SMAD3</a>       |
| SDHD     | Succinate Dehydrogenase Complex Subunit D                                    | Protein Coding | 45 | GC11P112087 | 30.61225 | <a href="https://www.genecards.org/cgi-bin/carddisp.pl?gene=SDHD">https://www.genecards.org/cgi-bin/carddisp.pl?gene=SDHD</a>         |
| HSPB8    | Heat Shock Protein Family B (Small) Member 8                                 | Protein Coding | 45 | GC12P119173 | 30.57958 | <a href="https://www.genecards.org/cgi-bin/carddisp.pl?gene=HSPB8">https://www.genecards.org/cgi-bin/carddisp.pl?gene=HSPB8</a>       |
| MIR23B   | MicroRNA 23b                                                                 | RNA Gene       | 19 | GC09P095085 | 30.56204 | <a href="https://www.genecards.org/cgi-bin/carddisp.pl?gene=MIR23B">https://www.genecards.org/cgi-bin/carddisp.pl?gene=MIR23B</a>     |
| TFR2     | Transferrin Receptor 2                                                       | Protein Coding | 45 | GC07M100620 | 30.52137 | <a href="https://www.genecards.org/cgi-bin/carddisp.pl?gene=TFR2">https://www.genecards.org/cgi-bin/carddisp.pl?gene=TFR2</a>         |
| SERPINC1 | Serpin Family C Member 1                                                     | Protein Coding | 49 | GC01M174251 | 30.48973 | <a href="https://www.genecards.org/cgi-bin/carddisp.pl?gene=SERPINC1">https://www.genecards.org/cgi-bin/carddisp.pl?gene=SERPINC1</a> |
| AKT2     | AKT Serine/Threonine Kinase 2                                                | Protein Coding | 54 | GC19M040230 | 30.47733 | <a href="https://www.genecards.org/cgi-bin/carddisp.pl?gene=AKT2">https://www.genecards.org/cgi-bin/carddisp.pl?gene=AKT2</a>         |
| MAOA     | Monoamine Oxidase A                                                          | Protein Coding | 51 | GC0XP043654 | 30.41586 | <a href="https://www.genecards.org/cgi-bin/carddisp.pl?gene=MAOA">https://www.genecards.org/cgi-bin/carddisp.pl?gene=MAOA</a>         |
| TJP2     | Tight Junction Protein 2                                                     | Protein Coding | 47 | GC09P069121 | 30.40238 | <a href="https://www.genecards.org/cgi-bin/carddisp.pl?gene=TJP2">https://www.genecards.org/cgi-bin/carddisp.pl?gene=TJP2</a>         |
| PMM2     | Phosphomannomutase 2                                                         | Protein Coding | 47 | GC16P008788 | 30.3838  | <a href="https://www.genecards.org/cgi-bin/carddisp.pl?gene=PMM2">https://www.genecards.org/cgi-bin/carddisp.pl?gene=PMM2</a>         |
| CHAT     | Choline O-Acetyltransferase                                                  | Protein Coding | 48 | GC10P049609 | 30.38092 | <a href="https://www.genecards.org/cgi-bin/carddisp.pl?gene=CHAT">https://www.genecards.org/cgi-bin/carddisp.pl?gene=CHAT</a>         |
| GYS1     | Glycogen Synthase 1                                                          | Protein Coding | 50 | GC19M048970 | 30.36652 | <a href="https://www.genecards.org/cgi-bin/carddisp.pl?gene=GYS1">https://www.genecards.org/cgi-bin/carddisp.pl?gene=GYS1</a>         |
| AHSG     | Alpha 2-HS Glycoprotein                                                      | Protein Coding | 44 | GC03P186612 | 30.36555 | <a href="https://www.genecards.org/cgi-bin/carddisp.pl?gene=AHSG">https://www.genecards.org/cgi-bin/carddisp.pl?gene=AHSG</a>         |
| PRKCD    | Protein Kinase C Delta                                                       | Protein Coding | 54 | GC03P053156 | 30.35056 | <a href="https://www.genecards.org/cgi-bin/carddisp.pl?gene=PRKCD">https://www.genecards.org/cgi-bin/carddisp.pl?gene=PRKCD</a>       |

|          |                                                 |                |    |             |          |                                                                                                                                       |
|----------|-------------------------------------------------|----------------|----|-------------|----------|---------------------------------------------------------------------------------------------------------------------------------------|
| AKR1D1   | Aldo-Keto Reductase Family 1 Member D1          | Protein Coding | 47 | GC07P138003 | 30.34717 | <a href="https://www.genecards.org/cgi-bin/carddisp.pl?gene=AKR1D1">https://www.genecards.org/cgi-bin/carddisp.pl?gene=AKR1D1</a>     |
| MSH2     | MutS Homolog 2                                  | Protein Coding | 49 | GC02P047402 | 30.34285 | <a href="https://www.genecards.org/cgi-bin/carddisp.pl?gene=MSH2">https://www.genecards.org/cgi-bin/carddisp.pl?gene=MSH2</a>         |
| GFER     | Growth Factor, Augmenter Of Liver Regeneration  | Protein Coding | 45 | GC16P001984 | 30.30947 | <a href="https://www.genecards.org/cgi-bin/carddisp.pl?gene=GFER">https://www.genecards.org/cgi-bin/carddisp.pl?gene=GFER</a>         |
| GCG      | Glucagon                                        | Protein Coding | 41 | GC02M162142 | 30.19323 | <a href="https://www.genecards.org/cgi-bin/carddisp.pl?gene=GCG">https://www.genecards.org/cgi-bin/carddisp.pl?gene=GCG</a>           |
| ATP7A    | ATPase Copper Transporting Alpha                | Protein Coding | 47 | GC0XP077943 | 30.17986 | <a href="https://www.genecards.org/cgi-bin/carddisp.pl?gene=ATP7A">https://www.genecards.org/cgi-bin/carddisp.pl?gene=ATP7A</a>       |
| RPGRIP1L | RPGRIP1 Like                                    | Protein Coding | 39 | GC16M053597 | 30.1636  | <a href="https://www.genecards.org/cgi-bin/carddisp.pl?gene=RPGRIP1L">https://www.genecards.org/cgi-bin/carddisp.pl?gene=RPGRIP1L</a> |
| ADA      | Adenosine Deaminase                             | Protein Coding | 52 | GC20M044620 | 30.14722 | <a href="https://www.genecards.org/cgi-bin/carddisp.pl?gene=ADA">https://www.genecards.org/cgi-bin/carddisp.pl?gene=ADA</a>           |
| PHKB     | Phosphorylase Kinase Regulatory Subunit Beta    | Protein Coding | 46 | GC16P047436 | 30.13322 | <a href="https://www.genecards.org/cgi-bin/carddisp.pl?gene=PHKB">https://www.genecards.org/cgi-bin/carddisp.pl?gene=PHKB</a>         |
| OFD1     | OFD1 Centriole And Centriolar Satellite Protein | Protein Coding | 43 | GC0XP013734 | 30.11156 | <a href="https://www.genecards.org/cgi-bin/carddisp.pl?gene=OFD1">https://www.genecards.org/cgi-bin/carddisp.pl?gene=OFD1</a>         |
| ETFDH    | Electron Transfer Flavoprotein Dehydrogenase    | Protein Coding | 45 | GC04P158672 | 30.08014 | <a href="https://www.genecards.org/cgi-bin/carddisp.pl?gene=ETFDH">https://www.genecards.org/cgi-bin/carddisp.pl?gene=ETFDH</a>       |
| CCR5     | C-C Motif Chemokine Receptor 5                  | Protein Coding | 47 | GC03P046383 | 30.06822 | <a href="https://www.genecards.org/cgi-bin/carddisp.pl?gene=CCR5">https://www.genecards.org/cgi-bin/carddisp.pl?gene=CCR5</a>         |
| AMACR    | Alpha-Methylacyl-CoA Racemase                   | Protein Coding | 46 | GC05M033986 | 30.05449 | <a href="https://www.genecards.org/cgi-bin/carddisp.pl?gene=AMACR">https://www.genecards.org/cgi-bin/carddisp.pl?gene=AMACR</a>       |
| MIR196A2 | MicroRNA 196a-2                                 | RNA Gene       | 21 | GC12P054368 | 30.04873 | <a href="https://www.genecards.org/cgi-bin/carddisp.pl?gene=MIR196A2">https://www.genecards.org/cgi-bin/carddisp.pl?gene=MIR196A2</a> |
| LIPE     | Lipase E, Hormone Sensitive Type                | Protein Coding | 48 | GC19M042401 | 30.04714 | <a href="https://www.genecards.org/cgi-bin/carddisp.pl?gene=LIPE">https://www.genecards.org/cgi-bin/carddisp.pl?gene=LIPE</a>         |
| IFT172   | Intraflagellar Transport 172                    | Protein Coding | 40 | GC02M027537 | 30.01382 | <a href="https://www.genecards.org/cgi-bin/carddisp.pl?gene=IFT172">https://www.genecards.org/cgi-bin/carddisp.pl?gene=IFT172</a>     |
| MIR31    | MicroRNA 31                                     | RNA Gene       | 20 | GC09M021513 | 29.99636 | <a href="https://www.genecards.org/cgi-bin/carddisp.pl?gene=MIR31">https://www.genecards.org/cgi-bin/carddisp.pl?gene=MIR31</a>       |
| NPY      | Neuropeptide Y                                  | Protein Coding | 46 | GC07P024290 | 29.94777 | <a href="https://www.genecards.org/cgi-bin/carddisp.pl?gene=NPY">https://www.genecards.org/cgi-bin/carddisp.pl?gene=NPY</a>           |
| MIR23A   | MicroRNA 23a                                    | RNA Gene       | 20 | GC19M014110 | 29.90722 | <a href="https://www.genecards.org/cgi-bin/carddisp.pl?gene=MIR23A">https://www.genecards.org/cgi-bin/carddisp.pl?gene=MIR23A</a>     |
| NPHP1    | Nephrocystin 1                                  | Protein Coding | 44 | GC02M110122 | 29.85468 | <a href="https://www.genecards.org/cgi-bin/carddisp.pl?gene=NPHP1">https://www.genecards.org/cgi-bin/carddisp.pl?gene=NPHP1</a>       |
| ARSA     | Arylsulfatase A                                 | Protein Coding | 47 | GC22M050622 | 29.83828 | <a href="https://www.genecards.org/cgi-bin/carddisp.pl?gene=ARSA">https://www.genecards.org/cgi-bin/carddisp.pl?gene=ARSA</a>         |

|          |                                                                       |                |    |             |          |                                                                                                                                       |
|----------|-----------------------------------------------------------------------|----------------|----|-------------|----------|---------------------------------------------------------------------------------------------------------------------------------------|
| MAP2K1   | Mitogen-Activated Protein Kinase Kinase 1                             | Protein Coding | 54 | GC15P066386 | 29.82568 | <a href="https://www.genecards.org/cgi-bin/carddisp.pl?gene=MAP2K1">https://www.genecards.org/cgi-bin/carddisp.pl?gene=MAP2K1</a>     |
| ADAMTS13 | ADAM Metalloproteinase With Thrombospondin Type 1 Motif 13            | Protein Coding | 47 | GC09P133414 | 29.77298 | <a href="https://www.genecards.org/cgi-bin/carddisp.pl?gene=ADAMTS13">https://www.genecards.org/cgi-bin/carddisp.pl?gene=ADAMTS13</a> |
| MT-ND5   | Mitochondrially Encoded NADH:Ubiquinone Oxidoreductase Core Subunit 5 | Protein Coding | 33 | GCMTP012339 | 29.76902 | <a href="https://www.genecards.org/cgi-bin/carddisp.pl?gene=MT-ND5">https://www.genecards.org/cgi-bin/carddisp.pl?gene=MT-ND5</a>     |
| FGFR2    | Fibroblast Growth Factor Receptor 2 Protein Kinase                    | Protein Coding | 54 | GC10M121478 | 29.76437 | <a href="https://www.genecards.org/cgi-bin/carddisp.pl?gene=FGFR2">https://www.genecards.org/cgi-bin/carddisp.pl?gene=FGFR2</a>       |
| PRKAR1A  | CAMP-Dependent Type I Regulatory Subunit Alpha                        | Protein Coding | 52 | GC17P068545 | 29.75539 | <a href="https://www.genecards.org/cgi-bin/carddisp.pl?gene=PRKAR1A">https://www.genecards.org/cgi-bin/carddisp.pl?gene=PRKAR1A</a>   |
| HIF1A    | Hypoxia Inducible Factor 1 Subunit Alpha                              | Protein Coding | 48 | GC14P061695 | 29.73709 | <a href="https://www.genecards.org/cgi-bin/carddisp.pl?gene=HIF1A">https://www.genecards.org/cgi-bin/carddisp.pl?gene=HIF1A</a>       |
| CNR1     | Cannabinoid Receptor 1                                                | Protein Coding | 47 | GC06M088139 | 29.72316 | <a href="https://www.genecards.org/cgi-bin/carddisp.pl?gene=CNR1">https://www.genecards.org/cgi-bin/carddisp.pl?gene=CNR1</a>         |
| PLIN2    | Perilipin 2                                                           | Protein Coding | 44 | GC09M019127 | 29.71279 | <a href="https://www.genecards.org/cgi-bin/carddisp.pl?gene=PLIN2">https://www.genecards.org/cgi-bin/carddisp.pl?gene=PLIN2</a>       |
| GM2A     | GM2 Ganglioside Activator                                             | Protein Coding | 43 | GC05P151229 | 29.71018 | <a href="https://www.genecards.org/cgi-bin/carddisp.pl?gene=GM2A">https://www.genecards.org/cgi-bin/carddisp.pl?gene=GM2A</a>         |
| INPP5E   | Inositol Polyphosphate 5-Phosphatase E                                | Protein Coding | 42 | GC09M136428 | 29.64631 | <a href="https://www.genecards.org/cgi-bin/carddisp.pl?gene=INPP5E">https://www.genecards.org/cgi-bin/carddisp.pl?gene=INPP5E</a>     |
| JUP      | Junction Plakoglobin                                                  | Protein Coding | 48 | GC17M041754 | 29.63376 | <a href="https://www.genecards.org/cgi-bin/carddisp.pl?gene=JUP">https://www.genecards.org/cgi-bin/carddisp.pl?gene=JUP</a>           |
| XIAP     | X-Linked Inhibitor Of Apoptosis                                       | Protein Coding | 50 | GC0XP123859 | 29.61671 | <a href="https://www.genecards.org/cgi-bin/carddisp.pl?gene=XIAP">https://www.genecards.org/cgi-bin/carddisp.pl?gene=XIAP</a>         |
| IL13     | Interleukin 13                                                        | Protein Coding | 45 | GC05P132656 | 29.61028 | <a href="https://www.genecards.org/cgi-bin/carddisp.pl?gene=IL13">https://www.genecards.org/cgi-bin/carddisp.pl?gene=IL13</a>         |
| ERCC6    | ERCC Excision Repair 6, Chromatin Remodeling Factor                   | Protein Coding | 46 | GC10M049454 | 29.59432 | <a href="https://www.genecards.org/cgi-bin/carddisp.pl?gene=ERCC6">https://www.genecards.org/cgi-bin/carddisp.pl?gene=ERCC6</a>       |
| ABCB7    | ATP Binding Cassette Subfamily B Member 7                             | Protein Coding | 44 | GC0XM075053 | 29.55732 | <a href="https://www.genecards.org/cgi-bin/carddisp.pl?gene=ABCB7">https://www.genecards.org/cgi-bin/carddisp.pl?gene=ABCB7</a>       |

|         |                                                       |                   |    |                 |          |                                                                                                                                     |
|---------|-------------------------------------------------------|-------------------|----|-----------------|----------|-------------------------------------------------------------------------------------------------------------------------------------|
| CEBPA   | CCAAT<br>Enhancer<br>Binding Protein<br>Alpha         | Protein<br>Coding | 48 | GC19M033<br>299 | 29.52411 | <a href="https://www.genecards.org/cgi-bin/carddisp.pl?gene=CEBPA">https://www.genecards.org/cgi-bin/carddisp.pl?gene=CEBPA</a>     |
| SLC2A4  | Solute Carrier<br>Family 2<br>Member 4                | Protein<br>Coding | 47 | GC17P0090<br>71 | 29.49243 | <a href="https://www.genecards.org/cgi-bin/carddisp.pl?gene=SLC2A4">https://www.genecards.org/cgi-bin/carddisp.pl?gene=SLC2A4</a>   |
| MYH7    | Myosin Heavy<br>Chain 7                               | Protein<br>Coding | 48 | GC14M023<br>412 | 29.45399 | <a href="https://www.genecards.org/cgi-bin/carddisp.pl?gene=MYH7">https://www.genecards.org/cgi-bin/carddisp.pl?gene=MYH7</a>       |
| HNRNPA1 | Heterogeneous<br>Nuclear<br>Ribonucleoprotein A1      | Protein<br>Coding | 47 | GC12P0542<br>80 | 29.43881 | <a href="https://www.genecards.org/cgi-bin/carddisp.pl?gene=HNRNPA1">https://www.genecards.org/cgi-bin/carddisp.pl?gene=HNRNPA1</a> |
| FGD4    | FYVE, RhoGEF<br>And PH<br>Domain<br>Containing 4      | Protein<br>Coding | 43 | GC12P0324<br>07 | 29.41738 | <a href="https://www.genecards.org/cgi-bin/carddisp.pl?gene=FGD4">https://www.genecards.org/cgi-bin/carddisp.pl?gene=FGD4</a>       |
| NLRP3   | NLR Family<br>Pyrin Domain<br>Containing 3            | Protein<br>Coding | 48 | GC01P2474<br>15 | 29.38379 | <a href="https://www.genecards.org/cgi-bin/carddisp.pl?gene=NLRP3">https://www.genecards.org/cgi-bin/carddisp.pl?gene=NLRP3</a>     |
| SLC27A1 | Solute Carrier<br>Family 27<br>Member 1               | Protein<br>Coding | 41 | GC19P0266<br>39 | 29.37304 | <a href="https://www.genecards.org/cgi-bin/carddisp.pl?gene=SLC27A1">https://www.genecards.org/cgi-bin/carddisp.pl?gene=SLC27A1</a> |
| GRN     | Granulin<br>Precursor                                 | Protein<br>Coding | 47 | GC17P0443<br>45 | 29.34554 | <a href="https://www.genecards.org/cgi-bin/carddisp.pl?gene=GRN">https://www.genecards.org/cgi-bin/carddisp.pl?gene=GRN</a>         |
| EDN1    | Endothelin 1                                          | Protein<br>Coding | 48 | GC06P0122<br>56 | 29.34463 | <a href="https://www.genecards.org/cgi-bin/carddisp.pl?gene=EDN1">https://www.genecards.org/cgi-bin/carddisp.pl?gene=EDN1</a>       |
| NOTCH2  | Notch Receptor<br>2                                   | Protein<br>Coding | 50 | GC01M119<br>911 | 29.34434 | <a href="https://www.genecards.org/cgi-bin/carddisp.pl?gene=NOTCH2">https://www.genecards.org/cgi-bin/carddisp.pl?gene=NOTCH2</a>   |
| GAPDH   | Glyceraldehyde<br>-3-Phosphate<br>Dehydrogenase       | Protein<br>Coding | 48 | GC12P0118<br>41 | 29.33832 | <a href="https://www.genecards.org/cgi-bin/carddisp.pl?gene=GAPDH">https://www.genecards.org/cgi-bin/carddisp.pl?gene=GAPDH</a>     |
| F3      | Coagulation<br>Factor III,<br>Tissue Factor           | Protein<br>Coding | 45 | GC01M094<br>530 | 29.33734 | <a href="https://www.genecards.org/cgi-bin/carddisp.pl?gene=F3">https://www.genecards.org/cgi-bin/carddisp.pl?gene=F3</a>           |
| C3      | Complement<br>C3                                      | Protein<br>Coding | 48 | GC19M006<br>677 | 29.31971 | <a href="https://www.genecards.org/cgi-bin/carddisp.pl?gene=C3">https://www.genecards.org/cgi-bin/carddisp.pl?gene=C3</a>           |
| BMP6    | Bone<br>Morphogenetic<br>Protein 6                    | Protein<br>Coding | 44 | GC06P0077<br>26 | 29.30725 | <a href="https://www.genecards.org/cgi-bin/carddisp.pl?gene=BMP6">https://www.genecards.org/cgi-bin/carddisp.pl?gene=BMP6</a>       |
| SLC2A2  | Solute Carrier<br>Family 2<br>Member 2                | Protein<br>Coding | 50 | GC03M170<br>996 | 29.28117 | <a href="https://www.genecards.org/cgi-bin/carddisp.pl?gene=SLC2A2">https://www.genecards.org/cgi-bin/carddisp.pl?gene=SLC2A2</a>   |
| G6PD    | Glucose-6-<br>Phosphate<br>Dehydrogenase              | Protein<br>Coding | 51 | GC0XM154<br>531 | 29.21536 | <a href="https://www.genecards.org/cgi-bin/carddisp.pl?gene=G6PD">https://www.genecards.org/cgi-bin/carddisp.pl?gene=G6PD</a>       |
| HSPD1   | Heat Shock<br>Protein Family<br>D (Hsp60)<br>Member 1 | Protein<br>Coding | 48 | GC02M197<br>486 | 29.21293 | <a href="https://www.genecards.org/cgi-bin/carddisp.pl?gene=HSPD1">https://www.genecards.org/cgi-bin/carddisp.pl?gene=HSPD1</a>     |

|         |                                                                |                   |    |                 |          |                                                                                                                                     |
|---------|----------------------------------------------------------------|-------------------|----|-----------------|----------|-------------------------------------------------------------------------------------------------------------------------------------|
| ALMS1   | ALMS1<br>Centrosome<br>And Basal Body<br>Associated<br>Protein | Protein<br>Coding | 42 | GC02P0733<br>85 | 29.20957 | <a href="https://www.genecards.org/cgi-bin/carddisp.pl?gene=ALMS1">https://www.genecards.org/cgi-bin/carddisp.pl?gene=ALMS1</a>     |
| ARG1    | Arginase 1                                                     | Protein<br>Coding | 50 | GC06P1314<br>73 | 29.12553 | <a href="https://www.genecards.org/cgi-bin/carddisp.pl?gene=ARG1">https://www.genecards.org/cgi-bin/carddisp.pl?gene=ARG1</a>       |
| SLC27A4 | Solute Carrier<br>Family 27<br>Member 4                        | Protein<br>Coding | 47 | GC09P1283<br>40 | 29.11403 | <a href="https://www.genecards.org/cgi-bin/carddisp.pl?gene=SLC27A4">https://www.genecards.org/cgi-bin/carddisp.pl?gene=SLC27A4</a> |
| IL23R   | Interleukin 23<br>Receptor                                     | Protein<br>Coding | 45 | GC01P0671<br>38 | 29.03369 | <a href="https://www.genecards.org/cgi-bin/carddisp.pl?gene=IL23R">https://www.genecards.org/cgi-bin/carddisp.pl?gene=IL23R</a>     |
| ELANE   | Elastase,<br>Neutrophil<br>Expressed                           | Protein<br>Coding | 47 | GC19P0008<br>55 | 29.01259 | <a href="https://www.genecards.org/cgi-bin/carddisp.pl?gene=ELANE">https://www.genecards.org/cgi-bin/carddisp.pl?gene=ELANE</a>     |
| LBR     | Lamin B<br>Receptor                                            | Protein<br>Coding | 48 | GC01M225<br>401 | 28.98354 | <a href="https://www.genecards.org/cgi-bin/carddisp.pl?gene=LBR">https://www.genecards.org/cgi-bin/carddisp.pl?gene=LBR</a>         |
| IGF1R   | Insulin Like<br>Growth Factor<br>1 Receptor                    | Protein<br>Coding | 55 | GC15P0986<br>48 | 28.96224 | <a href="https://www.genecards.org/cgi-bin/carddisp.pl?gene=IGF1R">https://www.genecards.org/cgi-bin/carddisp.pl?gene=IGF1R</a>     |
| RLBP1   | Retinaldehyde<br>Binding Protein<br>1                          | Protein<br>Coding | 45 | GC15M089<br>209 | 28.95952 | <a href="https://www.genecards.org/cgi-bin/carddisp.pl?gene=RLBP1">https://www.genecards.org/cgi-bin/carddisp.pl?gene=RLBP1</a>     |
| ASS1    | Argininosuccin<br>ate Synthase 1                               | Protein<br>Coding | 49 | GC09P1304<br>44 | 28.95013 | <a href="https://www.genecards.org/cgi-bin/carddisp.pl?gene=ASS1">https://www.genecards.org/cgi-bin/carddisp.pl?gene=ASS1</a>       |
| MIR191  | MicroRNA 191                                                   | RNA<br>Gene       | 20 | GC03M049<br>438 | 28.94748 | <a href="https://www.genecards.org/cgi-bin/carddisp.pl?gene=MIR191">https://www.genecards.org/cgi-bin/carddisp.pl?gene=MIR191</a>   |
| ALDH9A1 | Aldehyde<br>Dehydrogenase<br>9 Family<br>Member A1             | Protein<br>Coding | 42 | GC01M165<br>670 | 28.94373 | <a href="https://www.genecards.org/cgi-bin/carddisp.pl?gene=ALDH9A1">https://www.genecards.org/cgi-bin/carddisp.pl?gene=ALDH9A1</a> |
| THBD    | Thrombomodul<br>in                                             | Protein<br>Coding | 44 | GC20M023<br>026 | 28.87011 | <a href="https://www.genecards.org/cgi-bin/carddisp.pl?gene=THBD">https://www.genecards.org/cgi-bin/carddisp.pl?gene=THBD</a>       |
| AHI1    | Abelson Helper<br>Integration Site<br>1                        | Protein<br>Coding | 42 | GC06M135<br>283 | 28.86435 | <a href="https://www.genecards.org/cgi-bin/carddisp.pl?gene=AHI1">https://www.genecards.org/cgi-bin/carddisp.pl?gene=AHI1</a>       |
| B2M     | Beta-2-<br>Microglobulin                                       | Protein<br>Coding | 49 | GC15P0447<br>11 | 28.82696 | <a href="https://www.genecards.org/cgi-bin/carddisp.pl?gene=B2M">https://www.genecards.org/cgi-bin/carddisp.pl?gene=B2M</a>         |
| ELOVL5  | ELOVL Fatty<br>Acid Elongase<br>5                              | Protein<br>Coding | 44 | GC06M053<br>240 | 28.80394 | <a href="https://www.genecards.org/cgi-bin/carddisp.pl?gene=ELOVL5">https://www.genecards.org/cgi-bin/carddisp.pl?gene=ELOVL5</a>   |
| WT1     | WT1<br>Transcription<br>Factor                                 | Protein<br>Coding | 50 | GC11M032<br>365 | 28.78292 | <a href="https://www.genecards.org/cgi-bin/carddisp.pl?gene=WT1">https://www.genecards.org/cgi-bin/carddisp.pl?gene=WT1</a>         |
| PEX11B  | Peroxisomal<br>Biogenesis<br>Factor 11 Beta                    | Protein<br>Coding | 41 | GC01M145<br>911 | 28.73597 | <a href="https://www.genecards.org/cgi-bin/carddisp.pl?gene=PEX11B">https://www.genecards.org/cgi-bin/carddisp.pl?gene=PEX11B</a>   |
| IL6R    | Interleukin 6<br>Receptor                                      | Protein<br>Coding | 50 | GC01P1544<br>05 | 28.71971 | <a href="https://www.genecards.org/cgi-bin/carddisp.pl?gene=IL6R">https://www.genecards.org/cgi-bin/carddisp.pl?gene=IL6R</a>       |
| ACP5    | Acid<br>Phosphatase 5,<br>Tartrate<br>Resistant                | Protein<br>Coding | 47 | GC19M011<br>574 | 28.65755 | <a href="https://www.genecards.org/cgi-bin/carddisp.pl?gene=ACP5">https://www.genecards.org/cgi-bin/carddisp.pl?gene=ACP5</a>       |
| MECP2   | Methyl-CpG<br>Binding Protein<br>2                             | Protein<br>Coding | 46 | GC0XM154<br>021 | 28.62125 | <a href="https://www.genecards.org/cgi-bin/carddisp.pl?gene=MECP2">https://www.genecards.org/cgi-bin/carddisp.pl?gene=MECP2</a>     |

|          |                                                                       |                |    |              |          |                                                                                                                                       |
|----------|-----------------------------------------------------------------------|----------------|----|--------------|----------|---------------------------------------------------------------------------------------------------------------------------------------|
| MT-ND2   | Mitochondrially Encoded NADH:Ubiquinone Oxidoreductase Core Subunit 2 | Protein Coding | 34 | GCMTTP004472 | 28.61034 | <a href="https://www.genecards.org/cgi-bin/carddisp.pl?gene=MT-ND2">https://www.genecards.org/cgi-bin/carddisp.pl?gene=MT-ND2</a>     |
| BAX      | BCL2 Associated X, Apoptosis Regulator                                | Protein Coding | 49 | GC19P048954  | 28.60721 | <a href="https://www.genecards.org/cgi-bin/carddisp.pl?gene=BAX">https://www.genecards.org/cgi-bin/carddisp.pl?gene=BAX</a>           |
| DSP      | Desmoplakin                                                           | Protein Coding | 50 | GC06P007541  | 28.60315 | <a href="https://www.genecards.org/cgi-bin/carddisp.pl?gene=DSP">https://www.genecards.org/cgi-bin/carddisp.pl?gene=DSP</a>           |
| ABCC8    | ATP Binding Cassette Subfamily C Member 8                             | Protein Coding | 47 | GC11M017392  | 28.55995 | <a href="https://www.genecards.org/cgi-bin/carddisp.pl?gene=ABCC8">https://www.genecards.org/cgi-bin/carddisp.pl?gene=ABCC8</a>       |
| NCF4     | Neutrophil Cytosolic Factor 4                                         | Protein Coding | 49 | GC22P036860  | 28.54453 | <a href="https://www.genecards.org/cgi-bin/carddisp.pl?gene=NCF4">https://www.genecards.org/cgi-bin/carddisp.pl?gene=NCF4</a>         |
| MIR181A2 | MicroRNA 181a-2                                                       | RNA Gene       | 20 | GC09P124692  | 28.54213 | <a href="https://www.genecards.org/cgi-bin/carddisp.pl?gene=MIR181A2">https://www.genecards.org/cgi-bin/carddisp.pl?gene=MIR181A2</a> |
| MIR200A  | MicroRNA 200a                                                         | RNA Gene       | 22 | GC01P002022  | 28.52721 | <a href="https://www.genecards.org/cgi-bin/carddisp.pl?gene=MIR200A">https://www.genecards.org/cgi-bin/carddisp.pl?gene=MIR200A</a>   |
| CREB1    | CAMP Responsive Element Binding Protein 1                             | Protein Coding | 50 | GC02P207529  | 28.51627 | <a href="https://www.genecards.org/cgi-bin/carddisp.pl?gene=CREB1">https://www.genecards.org/cgi-bin/carddisp.pl?gene=CREB1</a>       |
| UGT1A7   | UDP Glucuronosyltransferase Family 1 Member A7                        | Protein Coding | 39 | GC02P233681  | 28.5161  | <a href="https://www.genecards.org/cgi-bin/carddisp.pl?gene=UGT1A7">https://www.genecards.org/cgi-bin/carddisp.pl?gene=UGT1A7</a>     |
| SCARB2   | Scavenger Receptor Class B Member 2                                   | Protein Coding | 44 | GC04M076158  | 28.49587 | <a href="https://www.genecards.org/cgi-bin/carddisp.pl?gene=SCARB2">https://www.genecards.org/cgi-bin/carddisp.pl?gene=SCARB2</a>     |
| MIR224   | MicroRNA 224                                                          | RNA Gene       | 17 | GC0XM151958  | 28.47194 | <a href="https://www.genecards.org/cgi-bin/carddisp.pl?gene=MIR224">https://www.genecards.org/cgi-bin/carddisp.pl?gene=MIR224</a>     |
| ACTA2    | Actin Alpha 2, Smooth Muscle                                          | Protein Coding | 49 | GC10M088935  | 28.45015 | <a href="https://www.genecards.org/cgi-bin/carddisp.pl?gene=ACTA2">https://www.genecards.org/cgi-bin/carddisp.pl?gene=ACTA2</a>       |
| LARS1    | Leucyl-TRNA Synthetase 1                                              | Protein Coding | 37 | GC05M146114  | 28.44983 | <a href="https://www.genecards.org/cgi-bin/carddisp.pl?gene=LARS1">https://www.genecards.org/cgi-bin/carddisp.pl?gene=LARS1</a>       |
| TGFB2    | Transforming Growth Factor Beta 2                                     | Protein Coding | 50 | GC01P218345  | 28.41203 | <a href="https://www.genecards.org/cgi-bin/carddisp.pl?gene=TGFB2">https://www.genecards.org/cgi-bin/carddisp.pl?gene=TGFB2</a>       |
| LPA      | Lipoprotein(A)                                                        | Protein Coding | 42 | GC06M160531  | 28.40335 | <a href="https://www.genecards.org/cgi-bin/carddisp.pl?gene=LPA">https://www.genecards.org/cgi-bin/carddisp.pl?gene=LPA</a>           |
| MIR199A1 | MicroRNA 199a-1                                                       | RNA Gene       | 19 | GC19M010817  | 28.39847 | <a href="https://www.genecards.org/cgi-bin/carddisp.pl?gene=MIR199A1">https://www.genecards.org/cgi-bin/carddisp.pl?gene=MIR199A1</a> |
| H2AC18   | H2A Clustered Histone 18                                              | Protein Coding | 26 | GC01M150124  | 28.3431  | <a href="https://www.genecards.org/cgi-bin/carddisp.pl?gene=H2AC18">https://www.genecards.org/cgi-bin/carddisp.pl?gene=H2AC18</a>     |
| VIM      | Vimentin                                                              | Protein Coding | 51 | GC10P017227  | 28.3147  | <a href="https://www.genecards.org/cgi-bin/carddisp.pl?gene=VIM">https://www.genecards.org/cgi-bin/carddisp.pl?gene=VIM</a>           |
| MMP3     | Matrix Metalloproteinase 3                                            | Protein Coding | 51 | GC11M102835  | 28.29143 | <a href="https://www.genecards.org/cgi-bin/carddisp.pl?gene=MMP3">https://www.genecards.org/cgi-bin/carddisp.pl?gene=MMP3</a>         |

|         |                                                                                      |                |    |             |          |                                                                                                                                     |
|---------|--------------------------------------------------------------------------------------|----------------|----|-------------|----------|-------------------------------------------------------------------------------------------------------------------------------------|
| COX5A   | Cytochrome C Oxidase Subunit 5A                                                      | Protein Coding | 45 | GC15M074919 | 28.26572 | <a href="https://www.genecards.org/cgi-bin/carddisp.pl?gene=COX5A">https://www.genecards.org/cgi-bin/carddisp.pl?gene=COX5A</a>     |
| GJA1    | Gap Junction Protein Alpha 1                                                         | Protein Coding | 51 | GC06P121436 | 28.25968 | <a href="https://www.genecards.org/cgi-bin/carddisp.pl?gene=GJA1">https://www.genecards.org/cgi-bin/carddisp.pl?gene=GJA1</a>       |
| ELN     | Elastin                                                                              | Protein Coding | 45 | GC07P074027 | 28.20924 | <a href="https://www.genecards.org/cgi-bin/carddisp.pl?gene=ELN">https://www.genecards.org/cgi-bin/carddisp.pl?gene=ELN</a>         |
| GRIN2A  | Glutamate Ionotropic Receptor NMDA Type Subunit 2A                                   | Protein Coding | 52 | GC16M009753 | 28.19079 | <a href="https://www.genecards.org/cgi-bin/carddisp.pl?gene=GRIN2A">https://www.genecards.org/cgi-bin/carddisp.pl?gene=GRIN2A</a>   |
| TM6SF2  | Transmembrane 6 Superfamily Member 2                                                 | Protein Coding | 29 | GC19M019264 | 28.19012 | <a href="https://www.genecards.org/cgi-bin/carddisp.pl?gene=TM6SF2">https://www.genecards.org/cgi-bin/carddisp.pl?gene=TM6SF2</a>   |
| FCGR2A  | Fc Fragment Of IgG Receptor IIa                                                      | Protein Coding | 46 | GC01P161505 | 28.18043 | <a href="https://www.genecards.org/cgi-bin/carddisp.pl?gene=FCGR2A">https://www.genecards.org/cgi-bin/carddisp.pl?gene=FCGR2A</a>   |
| FN1     | Fibronectin 1                                                                        | Protein Coding | 50 | GC02M215360 | 28.16509 | <a href="https://www.genecards.org/cgi-bin/carddisp.pl?gene=FN1">https://www.genecards.org/cgi-bin/carddisp.pl?gene=FN1</a>         |
| RRM2B   | Ribonucleotide Reductase Regulatory TP53 Inducible Subunit M2B                       | Protein Coding | 50 | GC08M102204 | 28.14182 | <a href="https://www.genecards.org/cgi-bin/carddisp.pl?gene=RRM2B">https://www.genecards.org/cgi-bin/carddisp.pl?gene=RRM2B</a>     |
| IDUA    | Alpha-L-Iduronidase                                                                  | Protein Coding | 43 | GC04P000986 | 28.08902 | <a href="https://www.genecards.org/cgi-bin/carddisp.pl?gene=IDUA">https://www.genecards.org/cgi-bin/carddisp.pl?gene=IDUA</a>       |
| TBK1    | TANK Binding Kinase 1                                                                | Protein Coding | 50 | GC12P064451 | 28.04251 | <a href="https://www.genecards.org/cgi-bin/carddisp.pl?gene=TBK1">https://www.genecards.org/cgi-bin/carddisp.pl?gene=TBK1</a>       |
| CST3    | Cystatin C                                                                           | Protein Coding | 45 | GC20M023627 | 28.04056 | <a href="https://www.genecards.org/cgi-bin/carddisp.pl?gene=CST3">https://www.genecards.org/cgi-bin/carddisp.pl?gene=CST3</a>       |
| DMD     | Dystrophin                                                                           | Protein Coding | 47 | GC0XM031097 | 27.96534 | <a href="https://www.genecards.org/cgi-bin/carddisp.pl?gene=DMD">https://www.genecards.org/cgi-bin/carddisp.pl?gene=DMD</a>         |
| HJV     | Hemojuvelin BMP Co-Receptor                                                          | Protein Coding | 36 | GC01M146018 | 27.94221 | <a href="https://www.genecards.org/cgi-bin/carddisp.pl?gene=HJV">https://www.genecards.org/cgi-bin/carddisp.pl?gene=HJV</a>         |
| MT-CO3  | Mitochondrially Encoded Cytochrome C Oxidase III SWI/SNF Related, Matrix Associated, | Protein Coding | 31 | GCMTP009209 | 27.86255 | <a href="https://www.genecards.org/cgi-bin/carddisp.pl?gene=MT-CO3">https://www.genecards.org/cgi-bin/carddisp.pl?gene=MT-CO3</a>   |
| SMARCA4 | Actin Dependent Regulator Of Chromatin, Subfamily A, Member 4                        | Protein Coding | 50 | GC19P010932 | 27.85229 | <a href="https://www.genecards.org/cgi-bin/carddisp.pl?gene=SMARCA4">https://www.genecards.org/cgi-bin/carddisp.pl?gene=SMARCA4</a> |
| CREBBP  | CREB Binding Protein Nuclear Receptor                                                | Protein Coding | 52 | GC16M003745 | 27.79096 | <a href="https://www.genecards.org/cgi-bin/carddisp.pl?gene=CREBBP">https://www.genecards.org/cgi-bin/carddisp.pl?gene=CREBBP</a>   |
| NR4A2   | Subfamily 4 Group A Member 2                                                         | Protein Coding | 48 | GC02M156324 | 27.7746  | <a href="https://www.genecards.org/cgi-bin/carddisp.pl?gene=NR4A2">https://www.genecards.org/cgi-bin/carddisp.pl?gene=NR4A2</a>     |

|               |                                                                        |                   |    |                 |          |                                                                                                                                         |
|---------------|------------------------------------------------------------------------|-------------------|----|-----------------|----------|-----------------------------------------------------------------------------------------------------------------------------------------|
| PRKAB1        | Protein Kinase<br>AMP-Activated<br>Non-Catalytic<br>Subunit Beta 1     | Protein<br>Coding | 48 | GC12P1196<br>32 | 27.74568 | <a href="https://www.genecards.org/cgi-bin/carddisp.pl?gene=PRKAB1">https://www.genecards.org/cgi-bin/carddisp.pl?gene=PRKAB1</a>       |
| CYP7A1        | Cytochrome<br>P450 Family 7<br>Subfamily A<br>Member 1                 | Protein<br>Coding | 44 | GC08M058<br>476 | 27.70166 | <a href="https://www.genecards.org/cgi-bin/carddisp.pl?gene=CYP7A1">https://www.genecards.org/cgi-bin/carddisp.pl?gene=CYP7A1</a>       |
| NDUFS4        | NADH:Ubiquin<br>one<br>Oxidoreductase<br>Subunit S4                    | Protein<br>Coding | 45 | GC05P0535<br>60 | 27.68033 | <a href="https://www.genecards.org/cgi-bin/carddisp.pl?gene=NDUFS4">https://www.genecards.org/cgi-bin/carddisp.pl?gene=NDUFS4</a>       |
| ABCD3         | ATP Binding<br>Cassette<br>Subfamily D<br>Member 3                     | Protein<br>Coding | 45 | GC01P0944<br>18 | 27.6318  | <a href="https://www.genecards.org/cgi-bin/carddisp.pl?gene=ABCD3">https://www.genecards.org/cgi-bin/carddisp.pl?gene=ABCD3</a>         |
| MAP3K5        | Mitogen-<br>Activated<br>Protein Kinase<br>Kinase Kinase 5             | Protein<br>Coding | 48 | GC06M136<br>557 | 27.62798 | <a href="https://www.genecards.org/cgi-bin/carddisp.pl?gene=MAP3K5">https://www.genecards.org/cgi-bin/carddisp.pl?gene=MAP3K5</a>       |
| ETFA          | Electron<br>Transfer<br>Flavoprotein<br>Subunit Alpha<br>Heterogeneous | Protein<br>Coding | 46 | GC15M076<br>215 | 27.62755 | <a href="https://www.genecards.org/cgi-bin/carddisp.pl?gene=ETFA">https://www.genecards.org/cgi-bin/carddisp.pl?gene=ETFA</a>           |
| HNRNPA2<br>B1 | Nuclear<br>Ribonucleoprot<br>ein A2/B1                                 | Protein<br>Coding | 47 | GC07M026<br>174 | 27.6245  | <a href="https://www.genecards.org/cgi-bin/carddisp.pl?gene=HNRNPA2B1">https://www.genecards.org/cgi-bin/carddisp.pl?gene=HNRNPA2B1</a> |
| ACACB         | Acetyl-CoA<br>Carboxylase<br>Beta                                      | Protein<br>Coding | 47 | GC12P1091<br>16 | 27.58549 | <a href="https://www.genecards.org/cgi-bin/carddisp.pl?gene=ACACB">https://www.genecards.org/cgi-bin/carddisp.pl?gene=ACACB</a>         |
| TNFRSF1B      | TNF Receptor<br>Superfamily<br>Member 1B                               | Protein<br>Coding | 48 | GC01P0121<br>67 | 27.55905 | <a href="https://www.genecards.org/cgi-bin/carddisp.pl?gene=TNFRSF1B">https://www.genecards.org/cgi-bin/carddisp.pl?gene=TNFRSF1B</a>   |
| PDGFRL        | Platelet Derived<br>Growth Factor<br>Receptor Like                     | Protein<br>Coding | 43 | GC08P0175<br>76 | 27.55731 | <a href="https://www.genecards.org/cgi-bin/carddisp.pl?gene=PDGFRL">https://www.genecards.org/cgi-bin/carddisp.pl?gene=PDGFRL</a>       |
| BCHE          | Butyrylcholinest<br>erase                                              | Protein<br>Coding | 49 | GC03M165<br>772 | 27.54298 | <a href="https://www.genecards.org/cgi-bin/carddisp.pl?gene=BCHE">https://www.genecards.org/cgi-bin/carddisp.pl?gene=BCHE</a>           |
| ACTB          | Actin Beta                                                             | Protein<br>Coding | 50 | GC07M005<br>527 | 27.54268 | <a href="https://www.genecards.org/cgi-bin/carddisp.pl?gene=ACTB">https://www.genecards.org/cgi-bin/carddisp.pl?gene=ACTB</a>           |
| DGUOK         | Deoxyguanosin<br>e Kinase                                              | Protein<br>Coding | 45 | GC02P0739<br>26 | 27.45197 | <a href="https://www.genecards.org/cgi-bin/carddisp.pl?gene=DGUOK">https://www.genecards.org/cgi-bin/carddisp.pl?gene=DGUOK</a>         |
| ATXN3         | Ataxin 3                                                               | Protein<br>Coding | 45 | GC14M095<br>796 | 27.44978 | <a href="https://www.genecards.org/cgi-bin/carddisp.pl?gene=ATXN3">https://www.genecards.org/cgi-bin/carddisp.pl?gene=ATXN3</a>         |
| C9orf72       | C9orf72-<br>SMCR8<br>Complex<br>Subunit                                | Protein<br>Coding | 42 | GC09M027<br>588 | 27.4369  | <a href="https://www.genecards.org/cgi-bin/carddisp.pl?gene=C9orf72">https://www.genecards.org/cgi-bin/carddisp.pl?gene=C9orf72</a>     |
| CD14          | CD14 Molecule                                                          | Protein<br>Coding | 45 | GC05M140<br>631 | 27.43073 | <a href="https://www.genecards.org/cgi-bin/carddisp.pl?gene=CD14">https://www.genecards.org/cgi-bin/carddisp.pl?gene=CD14</a>           |
| BMP2          | Bone<br>Morphogenetic<br>Protein 2                                     | Protein<br>Coding | 47 | GC20P0066<br>96 | 27.42911 | <a href="https://www.genecards.org/cgi-bin/carddisp.pl?gene=BMP2">https://www.genecards.org/cgi-bin/carddisp.pl?gene=BMP2</a>           |



|         |                                                    |                |    |             |          |                                                                                                                                     |
|---------|----------------------------------------------------|----------------|----|-------------|----------|-------------------------------------------------------------------------------------------------------------------------------------|
| BEST1   | Bestrophin 1                                       | Protein Coding | 44 | GC11P061949 | 27.41586 | <a href="https://www.genecards.org/cgi-bin/carddisp.pl?gene=BEST1">https://www.genecards.org/cgi-bin/carddisp.pl?gene=BEST1</a>     |
| GSK3B   | Glycogen Synthase Kinase 3 Beta                    | Protein Coding | 51 | GC03M119821 | 27.39133 | <a href="https://www.genecards.org/cgi-bin/carddisp.pl?gene=GSK3B">https://www.genecards.org/cgi-bin/carddisp.pl?gene=GSK3B</a>     |
| CCL5    | C-C Motif Chemokine Ligand 5                       | Protein Coding | 44 | GC17M035871 | 27.36868 | <a href="https://www.genecards.org/cgi-bin/carddisp.pl?gene=CCL5">https://www.genecards.org/cgi-bin/carddisp.pl?gene=CCL5</a>       |
| BCL2    | BCL2 Apoptosis Regulator                           | Protein Coding | 51 | GC18M063123 | 27.29396 | <a href="https://www.genecards.org/cgi-bin/carddisp.pl?gene=BCL2">https://www.genecards.org/cgi-bin/carddisp.pl?gene=BCL2</a>       |
| NAT2    | N-Acetyltransferase 2                              | Protein Coding | 44 | GC08P018391 | 27.22961 | <a href="https://www.genecards.org/cgi-bin/carddisp.pl?gene=NAT2">https://www.genecards.org/cgi-bin/carddisp.pl?gene=NAT2</a>       |
| PEX7    | Peroxisomal Biogenesis Factor 7                    | Protein Coding | 44 | GC06P136822 | 27.22859 | <a href="https://www.genecards.org/cgi-bin/carddisp.pl?gene=PEX7">https://www.genecards.org/cgi-bin/carddisp.pl?gene=PEX7</a>       |
| PCK2    | Phosphoenolpyruvate Carboxykinase 2, Mitochondrial | Protein Coding | 48 | GC14P024094 | 27.22156 | <a href="https://www.genecards.org/cgi-bin/carddisp.pl?gene=PCK2">https://www.genecards.org/cgi-bin/carddisp.pl?gene=PCK2</a>       |
| HARS1   | Histidyl-TRNA Synthetase 1                         | Protein Coding | 37 | GC05M140673 | 27.17268 | <a href="https://www.genecards.org/cgi-bin/carddisp.pl?gene=HARS1">https://www.genecards.org/cgi-bin/carddisp.pl?gene=HARS1</a>     |
| ALDOB   | Aldolase, Fructose-Bisphosphate B                  | Protein Coding | 46 | GC09M101420 | 27.15658 | <a href="https://www.genecards.org/cgi-bin/carddisp.pl?gene=ALDOB">https://www.genecards.org/cgi-bin/carddisp.pl?gene=ALDOB</a>     |
| SELE    | Selectin E                                         | Protein Coding | 44 | GC01M169722 | 27.12234 | <a href="https://www.genecards.org/cgi-bin/carddisp.pl?gene=SELE">https://www.genecards.org/cgi-bin/carddisp.pl?gene=SELE</a>       |
| MIR30A  | MicroRNA 30a                                       | RNA Gene       | 20 | GC06M071403 | 27.09053 | <a href="https://www.genecards.org/cgi-bin/carddisp.pl?gene=MIR30A">https://www.genecards.org/cgi-bin/carddisp.pl?gene=MIR30A</a>   |
| FGFR3   | Fibroblast Growth Factor Receptor 3                | Protein Coding | 55 | GC04P001795 | 27.07513 | <a href="https://www.genecards.org/cgi-bin/carddisp.pl?gene=FGFR3">https://www.genecards.org/cgi-bin/carddisp.pl?gene=FGFR3</a>     |
| SLC19A3 | Solute Carrier Family 19 Member 3                  | Protein Coding | 47 | GC02M227685 | 27.04611 | <a href="https://www.genecards.org/cgi-bin/carddisp.pl?gene=SLC19A3">https://www.genecards.org/cgi-bin/carddisp.pl?gene=SLC19A3</a> |
| RAF1    | Raf-1 Proto-Oncogene, Serine/Threonine Kinase      | Protein Coding | 54 | GC03M012583 | 27.03859 | <a href="https://www.genecards.org/cgi-bin/carddisp.pl?gene=RAF1">https://www.genecards.org/cgi-bin/carddisp.pl?gene=RAF1</a>       |
| GLB1    | Galactosidase Beta 1                               | Protein Coding | 48 | GC03M032963 | 27.02466 | <a href="https://www.genecards.org/cgi-bin/carddisp.pl?gene=GLB1">https://www.genecards.org/cgi-bin/carddisp.pl?gene=GLB1</a>       |
| NKX2-5  | NK2 Homeobox 5                                     | Protein Coding | 45 | GC05M173232 | 27.02188 | <a href="https://www.genecards.org/cgi-bin/carddisp.pl?gene=NKX2-5">https://www.genecards.org/cgi-bin/carddisp.pl?gene=NKX2-5</a>   |
| GSTT1   | Glutathione S-Transferase Theta 1                  | Protein Coding | 33 | GC22Mi00270 | 27.01846 | <a href="https://www.genecards.org/cgi-bin/carddisp.pl?gene=GSTT1">https://www.genecards.org/cgi-bin/carddisp.pl?gene=GSTT1</a>     |
| MSH6    | MutS Homolog 6                                     | Protein Coding | 51 | GC02P047695 | 27.00141 | <a href="https://www.genecards.org/cgi-bin/carddisp.pl?gene=MSH6">https://www.genecards.org/cgi-bin/carddisp.pl?gene=MSH6</a>       |
| KARS1   | Lysyl-TRNA Synthetase 1                            | Protein Coding | 38 | GC16M075628 | 26.97801 | <a href="https://www.genecards.org/cgi-bin/carddisp.pl?gene=KARS1">https://www.genecards.org/cgi-bin/carddisp.pl?gene=KARS1</a>     |
| CXCL12  | C-X-C Motif Chemokine Ligand 12                    | Protein Coding | 46 | GC10M044294 | 26.92284 | <a href="https://www.genecards.org/cgi-bin/carddisp.pl?gene=CXCL12">https://www.genecards.org/cgi-bin/carddisp.pl?gene=CXCL12</a>   |
| NPPB    | Natriuretic Peptide B                              | Protein Coding | 44 | GC01M011858 | 26.91472 | <a href="https://www.genecards.org/cgi-bin/carddisp.pl?gene=NPPB">https://www.genecards.org/cgi-bin/carddisp.pl?gene=NPPB</a>       |

|         |                                                                               |                   |    |                 |          |                                                                                                                                     |
|---------|-------------------------------------------------------------------------------|-------------------|----|-----------------|----------|-------------------------------------------------------------------------------------------------------------------------------------|
| PRKAA1  | Protein Kinase<br>AMP-Activated<br>Catalytic<br>Subunit Alpha<br>1            | Protein<br>Coding | 48 | GC05M040<br>759 | 26.90591 | <a href="https://www.genecards.org/cgi-bin/carddisp.pl?gene=PRKAA1">https://www.genecards.org/cgi-bin/carddisp.pl?gene=PRKAA1</a>   |
| ATP2A2  | ATPase<br>Sarcoplasmic/E<br>ndoplasmic<br>Reticulum<br>Ca2+<br>Transporting 2 | Protein<br>Coding | 52 | GC12P1102<br>80 | 26.90004 | <a href="https://www.genecards.org/cgi-bin/carddisp.pl?gene=ATP2A2">https://www.genecards.org/cgi-bin/carddisp.pl?gene=ATP2A2</a>   |
| OPRM1   | Opioid<br>Receptor Mu 1<br>Potassium                                          | Protein<br>Coding | 49 | GC06P1540<br>75 | 26.89049 | <a href="https://www.genecards.org/cgi-bin/carddisp.pl?gene=OPRM1">https://www.genecards.org/cgi-bin/carddisp.pl?gene=OPRM1</a>     |
| KCNQ1   | Voltage-Gated<br>Channel<br>Subfamily Q<br>Member 1                           | Protein<br>Coding | 50 | GC11P0024<br>44 | 26.87739 | <a href="https://www.genecards.org/cgi-bin/carddisp.pl?gene=KCNQ1">https://www.genecards.org/cgi-bin/carddisp.pl?gene=KCNQ1</a>     |
| MIR125A | MicroRNA 125a                                                                 | RNA<br>Gene       | 21 | GC19P0517<br>20 | 26.86593 | <a href="https://www.genecards.org/cgi-bin/carddisp.pl?gene=MIR125A">https://www.genecards.org/cgi-bin/carddisp.pl?gene=MIR125A</a> |
| ALPP    | Alkaline<br>Phosphatase,<br>Placental                                         | Protein<br>Coding | 47 | GC02P2323<br>78 | 26.85051 | <a href="https://www.genecards.org/cgi-bin/carddisp.pl?gene=ALPP">https://www.genecards.org/cgi-bin/carddisp.pl?gene=ALPP</a>       |
| FADS3   | Fatty Acid<br>Desaturase 3<br>Major                                           | Protein<br>Coding | 37 | GC11M061<br>873 | 26.83002 | <a href="https://www.genecards.org/cgi-bin/carddisp.pl?gene=FADS3">https://www.genecards.org/cgi-bin/carddisp.pl?gene=FADS3</a>     |
| HLA-A   | Histocompatibil<br>ity Complex,<br>Class I, A                                 | Protein<br>Coding | 48 | GC06P0551<br>61 | 26.8138  | <a href="https://www.genecards.org/cgi-bin/carddisp.pl?gene=HLA-A">https://www.genecards.org/cgi-bin/carddisp.pl?gene=HLA-A</a>     |
| FABP6   | Fatty Acid<br>Binding Protein<br>6                                            | Protein<br>Coding | 43 | GC05P1601<br>87 | 26.81321 | <a href="https://www.genecards.org/cgi-bin/carddisp.pl?gene=FABP6">https://www.genecards.org/cgi-bin/carddisp.pl?gene=FABP6</a>     |
| SOCS3   | Suppressor Of<br>Cytokine<br>Signaling 3<br>Cellular                          | Protein<br>Coding | 45 | GC17M078<br>356 | 26.81011 | <a href="https://www.genecards.org/cgi-bin/carddisp.pl?gene=SOCS3">https://www.genecards.org/cgi-bin/carddisp.pl?gene=SOCS3</a>     |
| CCN2    | Communicatio<br>n Network<br>Factor 2                                         | Protein<br>Coding | 40 | GC06M131<br>948 | 26.80043 | <a href="https://www.genecards.org/cgi-bin/carddisp.pl?gene=CCN2">https://www.genecards.org/cgi-bin/carddisp.pl?gene=CCN2</a>       |
| PRPH2   | Peripherin 2                                                                  | Protein<br>Coding | 39 | GC06M047<br>116 | 26.73267 | <a href="https://www.genecards.org/cgi-bin/carddisp.pl?gene=PRPH2">https://www.genecards.org/cgi-bin/carddisp.pl?gene=PRPH2</a>     |
| GPC3    | Glypican 3                                                                    | Protein<br>Coding | 46 | GC0XM133<br>535 | 26.71111 | <a href="https://www.genecards.org/cgi-bin/carddisp.pl?gene=GPC3">https://www.genecards.org/cgi-bin/carddisp.pl?gene=GPC3</a>       |
| FAH     | Fumarylacetoac<br>etate Hydrolase                                             | Protein<br>Coding | 47 | GC15P0801<br>52 | 26.70848 | <a href="https://www.genecards.org/cgi-bin/carddisp.pl?gene=FAH">https://www.genecards.org/cgi-bin/carddisp.pl?gene=FAH</a>         |
| DPP4    | Dipeptidyl<br>Peptidase 4<br>Protein                                          | Protein<br>Coding | 50 | GC02M161<br>992 | 26.70602 | <a href="https://www.genecards.org/cgi-bin/carddisp.pl?gene=DPP4">https://www.genecards.org/cgi-bin/carddisp.pl?gene=DPP4</a>       |
| PTPRC   | Tyrosine<br>Phosphatase<br>Receptor Type<br>C                                 | Protein<br>Coding | 51 | GC01P1986<br>07 | 26.60435 | <a href="https://www.genecards.org/cgi-bin/carddisp.pl?gene=PTPRC">https://www.genecards.org/cgi-bin/carddisp.pl?gene=PTPRC</a>     |
| MEN1    | Menin 1                                                                       | Protein<br>Coding | 47 | GC11M064<br>803 | 26.59502 | <a href="https://www.genecards.org/cgi-bin/carddisp.pl?gene=MEN1">https://www.genecards.org/cgi-bin/carddisp.pl?gene=MEN1</a>       |
| FLNA    | Filamin A                                                                     | Protein<br>Coding | 50 | GC0XM154<br>348 | 26.5132  | <a href="https://www.genecards.org/cgi-bin/carddisp.pl?gene=FLNA">https://www.genecards.org/cgi-bin/carddisp.pl?gene=FLNA</a>       |

|        |                                                  |                |    |             |          |                                                                                                                                   |
|--------|--------------------------------------------------|----------------|----|-------------|----------|-----------------------------------------------------------------------------------------------------------------------------------|
| PON2   | Paraoxonase 2                                    | Protein Coding | 44 | GC07M095404 | 26.49184 | <a href="https://www.genecards.org/cgi-bin/carddisp.pl?gene=PON2">https://www.genecards.org/cgi-bin/carddisp.pl?gene=PON2</a>     |
| CDKN1A | Cyclin Dependent Kinase Inhibitor 1A             | Protein Coding | 50 | GC06P055348 | 26.4918  | <a href="https://www.genecards.org/cgi-bin/carddisp.pl?gene=CDKN1A">https://www.genecards.org/cgi-bin/carddisp.pl?gene=CDKN1A</a> |
| SCT    | Secretin                                         | Protein Coding | 35 | GC11M000626 | 26.48512 | <a href="https://www.genecards.org/cgi-bin/carddisp.pl?gene=SCT">https://www.genecards.org/cgi-bin/carddisp.pl?gene=SCT</a>       |
| CFI    | Complement Factor I                              | Protein Coding | 47 | GC04M109732 | 26.47642 | <a href="https://www.genecards.org/cgi-bin/carddisp.pl?gene=CFI">https://www.genecards.org/cgi-bin/carddisp.pl?gene=CFI</a>       |
| NGF    | Nerve Growth Factor                              | Protein Coding | 51 | GC01M115285 | 26.4562  | <a href="https://www.genecards.org/cgi-bin/carddisp.pl?gene=NGF">https://www.genecards.org/cgi-bin/carddisp.pl?gene=NGF</a>       |
| PDGFRB | Platelet Derived Growth Factor Receptor Beta     | Protein Coding | 55 | GC05M150113 | 26.45407 | <a href="https://www.genecards.org/cgi-bin/carddisp.pl?gene=PDGFRB">https://www.genecards.org/cgi-bin/carddisp.pl?gene=PDGFRB</a> |
| PKLR   | Pyruvate Kinase L/R                              | Protein Coding | 48 | GC01M155289 | 26.42625 | <a href="https://www.genecards.org/cgi-bin/carddisp.pl?gene=PKLR">https://www.genecards.org/cgi-bin/carddisp.pl?gene=PKLR</a>     |
| RUNX1  | RUNX Family Transcription Factor 1               | Protein Coding | 49 | GC21M034787 | 26.42223 | <a href="https://www.genecards.org/cgi-bin/carddisp.pl?gene=RUNX1">https://www.genecards.org/cgi-bin/carddisp.pl?gene=RUNX1</a>   |
| JAK1   | Janus Kinase 1                                   | Protein Coding | 54 | GC01M064833 | 26.41035 | <a href="https://www.genecards.org/cgi-bin/carddisp.pl?gene=JAK1">https://www.genecards.org/cgi-bin/carddisp.pl?gene=JAK1</a>     |
| MMACHC | Metabolism Of Cobalamin Associated C Glycerol-3- | Protein Coding | 44 | GC01P045500 | 26.35614 | <a href="https://www.genecards.org/cgi-bin/carddisp.pl?gene=MMACHC">https://www.genecards.org/cgi-bin/carddisp.pl?gene=MMACHC</a> |
| GPD1   | Phosphate Dehydrogenase 1                        | Protein Coding | 46 | GC12P050105 | 26.32545 | <a href="https://www.genecards.org/cgi-bin/carddisp.pl?gene=GPD1">https://www.genecards.org/cgi-bin/carddisp.pl?gene=GPD1</a>     |
| FGF21  | Fibroblast Growth Factor 21                      | Protein Coding | 40 | GC19P048781 | 26.31933 | <a href="https://www.genecards.org/cgi-bin/carddisp.pl?gene=FGF21">https://www.genecards.org/cgi-bin/carddisp.pl?gene=FGF21</a>   |
| MAPK14 | Mitogen-Activated Protein Kinase 14              | Protein Coding | 52 | GC06P055339 | 26.3193  | <a href="https://www.genecards.org/cgi-bin/carddisp.pl?gene=MAPK14">https://www.genecards.org/cgi-bin/carddisp.pl?gene=MAPK14</a> |
| RAB7A  | RAB7A, Member RAS Oncogene Family                | Protein Coding | 49 | GC03P131442 | 26.28293 | <a href="https://www.genecards.org/cgi-bin/carddisp.pl?gene=RAB7A">https://www.genecards.org/cgi-bin/carddisp.pl?gene=RAB7A</a>   |
| CYP7B1 | Cytochrome P450 Family 7 Subfamily B Member 1    | Protein Coding | 46 | GC08M064587 | 26.24104 | <a href="https://www.genecards.org/cgi-bin/carddisp.pl?gene=CYP7B1">https://www.genecards.org/cgi-bin/carddisp.pl?gene=CYP7B1</a> |
| ALOX5  | Arachidonate 5-Lipoxygenase                      | Protein Coding | 50 | GC10P045374 | 26.23742 | <a href="https://www.genecards.org/cgi-bin/carddisp.pl?gene=ALOX5">https://www.genecards.org/cgi-bin/carddisp.pl?gene=ALOX5</a>   |
| THPO   | Thrombopoietin                                   | Protein Coding | 43 | GC03M184371 | 26.23381 | <a href="https://www.genecards.org/cgi-bin/carddisp.pl?gene=THPO">https://www.genecards.org/cgi-bin/carddisp.pl?gene=THPO</a>     |
| F7     | Coagulation Factor VII                           | Protein Coding | 48 | GC13P113105 | 26.22255 | <a href="https://www.genecards.org/cgi-bin/carddisp.pl?gene=F7">https://www.genecards.org/cgi-bin/carddisp.pl?gene=F7</a>         |
| ACAD9  | Acyl-CoA Dehydrogenase Family Member 9           | Protein Coding | 44 | GC03P131450 | 26.1841  | <a href="https://www.genecards.org/cgi-bin/carddisp.pl?gene=ACAD9">https://www.genecards.org/cgi-bin/carddisp.pl?gene=ACAD9</a>   |
| IL5    | Interleukin 5                                    | Protein Coding | 45 | GC05M132541 | 26.13515 | <a href="https://www.genecards.org/cgi-bin/carddisp.pl?gene=IL5">https://www.genecards.org/cgi-bin/carddisp.pl?gene=IL5</a>       |

|         |                                                                       |                |    |             |          |                                                                                                                                     |
|---------|-----------------------------------------------------------------------|----------------|----|-------------|----------|-------------------------------------------------------------------------------------------------------------------------------------|
| IKBKB   | Inhibitor Of Nuclear Factor Kappa B Kinase Subunit Beta               | Protein Coding | 53 | GC08P042271 | 26.09329 | <a href="https://www.genecards.org/cgi-bin/carddisp.pl?gene=IKBKB">https://www.genecards.org/cgi-bin/carddisp.pl?gene=IKBKB</a>     |
| NAGA    | Alpha-N-Acetylgalactosaminidase                                       | Protein Coding | 44 | GC22M042058 | 26.08938 | <a href="https://www.genecards.org/cgi-bin/carddisp.pl?gene=NAGA">https://www.genecards.org/cgi-bin/carddisp.pl?gene=NAGA</a>       |
| TGFB3   | Transforming Growth Factor Beta 3                                     | Protein Coding | 47 | GC14M075958 | 26.07246 | <a href="https://www.genecards.org/cgi-bin/carddisp.pl?gene=TGFB3">https://www.genecards.org/cgi-bin/carddisp.pl?gene=TGFB3</a>     |
| VCAM1   | Vascular Cell Adhesion Molecule 1                                     | Protein Coding | 46 | GC01P100719 | 26.07201 | <a href="https://www.genecards.org/cgi-bin/carddisp.pl?gene=VCAM1">https://www.genecards.org/cgi-bin/carddisp.pl?gene=VCAM1</a>     |
| NHLRC1  | NHL Repeat Containing E3 Ubiquitin Protein Ligase 1                   | Protein Coding | 41 | GC06M018120 | 26.04428 | <a href="https://www.genecards.org/cgi-bin/carddisp.pl?gene=NHLRC1">https://www.genecards.org/cgi-bin/carddisp.pl?gene=NHLRC1</a>   |
| EP300   | E1A Binding Protein P300                                              | Protein Coding | 51 | GC22P041091 | 26.03346 | <a href="https://www.genecards.org/cgi-bin/carddisp.pl?gene=EP300">https://www.genecards.org/cgi-bin/carddisp.pl?gene=EP300</a>     |
| PDCD1   | Programmed Cell Death 1                                               | Protein Coding | 48 | GC02M241849 | 25.99944 | <a href="https://www.genecards.org/cgi-bin/carddisp.pl?gene=PDCD1">https://www.genecards.org/cgi-bin/carddisp.pl?gene=PDCD1</a>     |
| IL1R1   | Interleukin 1 Receptor Type 1                                         | Protein Coding | 46 | GC02P102136 | 25.99226 | <a href="https://www.genecards.org/cgi-bin/carddisp.pl?gene=IL1R1">https://www.genecards.org/cgi-bin/carddisp.pl?gene=IL1R1</a>     |
| GATA6   | GATA Binding Protein 6                                                | Protein Coding | 48 | GC18P022169 | 25.97951 | <a href="https://www.genecards.org/cgi-bin/carddisp.pl?gene=GATA6">https://www.genecards.org/cgi-bin/carddisp.pl?gene=GATA6</a>     |
| GJB2    | Gap Junction Protein Beta 2                                           | Protein Coding | 47 | GC13M020187 | 25.95803 | <a href="https://www.genecards.org/cgi-bin/carddisp.pl?gene=GJB2">https://www.genecards.org/cgi-bin/carddisp.pl?gene=GJB2</a>       |
| MT-ND4  | Mitochondrially Encoded NADH:Ubiquinone Oxidoreductase Core Subunit 4 | Protein Coding | 33 | GCMTP010762 | 25.91657 | <a href="https://www.genecards.org/cgi-bin/carddisp.pl?gene=MT-ND4">https://www.genecards.org/cgi-bin/carddisp.pl?gene=MT-ND4</a>   |
| PLA2G2A | Phospholipase A2 Group IIA Succinate                                  | Protein Coding | 48 | GC01M019975 | 25.91336 | <a href="https://www.genecards.org/cgi-bin/carddisp.pl?gene=PLA2G2A">https://www.genecards.org/cgi-bin/carddisp.pl?gene=PLA2G2A</a> |
| SDHA    | Dehydrogenase Complex Flavoprotein Subunit A                          | Protein Coding | 48 | GC05P000208 | 25.90883 | <a href="https://www.genecards.org/cgi-bin/carddisp.pl?gene=SDHA">https://www.genecards.org/cgi-bin/carddisp.pl?gene=SDHA</a>       |
| CEL     | Carboxyl Ester Lipase                                                 | Protein Coding | 47 | GC09P133061 | 25.87259 | <a href="https://www.genecards.org/cgi-bin/carddisp.pl?gene=CEL">https://www.genecards.org/cgi-bin/carddisp.pl?gene=CEL</a>         |
| PRF1    | Perforin 1                                                            | Protein Coding | 45 | GC10M070597 | 25.84634 | <a href="https://www.genecards.org/cgi-bin/carddisp.pl?gene=PRF1">https://www.genecards.org/cgi-bin/carddisp.pl?gene=PRF1</a>       |
| CD79A   | CD79a Molecule                                                        | Protein Coding | 47 | GC19P041877 | 25.84297 | <a href="https://www.genecards.org/cgi-bin/carddisp.pl?gene=CD79A">https://www.genecards.org/cgi-bin/carddisp.pl?gene=CD79A</a>     |
| AWAT2   | Acyl-CoA Wax Alcohol Acyltransferase 2                                | Protein Coding | 33 | GC0XM070040 | 25.84177 | <a href="https://www.genecards.org/cgi-bin/carddisp.pl?gene=AWAT2">https://www.genecards.org/cgi-bin/carddisp.pl?gene=AWAT2</a>     |
| BGLAP   | Bone Gamma-Carboxyglutamate Protein                                   | Protein Coding | 41 | GC01P156242 | 25.82944 | <a href="https://www.genecards.org/cgi-bin/carddisp.pl?gene=BGLAP">https://www.genecards.org/cgi-bin/carddisp.pl?gene=BGLAP</a>     |

|        |                                                                                         |                |    |              |          |                                                                                                                                   |
|--------|-----------------------------------------------------------------------------------------|----------------|----|--------------|----------|-----------------------------------------------------------------------------------------------------------------------------------|
| UGT1A6 | UDP<br>Glucuronosyltransferase Family 1 Member A6                                       | Protein Coding | 42 | GC02P233691  | 25.82225 | <a href="https://www.genecards.org/cgi-bin/carddisp.pl?gene=UGT1A6">https://www.genecards.org/cgi-bin/carddisp.pl?gene=UGT1A6</a> |
| CBS    | Cystathionine Beta-Synthase Potassium Inwardly Rectifying Channel Subfamily J Member 11 | Protein Coding | 49 | GC21M043053  | 25.80807 | <a href="https://www.genecards.org/cgi-bin/carddisp.pl?gene=CBS">https://www.genecards.org/cgi-bin/carddisp.pl?gene=CBS</a>       |
| KCNJ11 | MutL Homolog 1                                                                          | Protein Coding | 48 | GC11M017385  | 25.79145 | <a href="https://www.genecards.org/cgi-bin/carddisp.pl?gene=KCNJ11">https://www.genecards.org/cgi-bin/carddisp.pl?gene=KCNJ11</a> |
| MLH1   | Surfactant Protein C                                                                    | Protein Coding | 49 | GC03P036993  | 25.77318 | <a href="https://www.genecards.org/cgi-bin/carddisp.pl?gene=MLH1">https://www.genecards.org/cgi-bin/carddisp.pl?gene=MLH1</a>     |
| SFTPC  | Integrin Subunit Alpha M                                                                | Protein Coding | 44 | GC08P022156  | 25.76713 | <a href="https://www.genecards.org/cgi-bin/carddisp.pl?gene=SFTPC">https://www.genecards.org/cgi-bin/carddisp.pl?gene=SFTPC</a>   |
| ITGAM  | Mitochondrially Encoded NADH:Ubiquinone Oxidoreductase Core Subunit 3                   | Protein Coding | 47 | GC16P032553  | 25.75382 | <a href="https://www.genecards.org/cgi-bin/carddisp.pl?gene=ITGAM">https://www.genecards.org/cgi-bin/carddisp.pl?gene=ITGAM</a>   |
| MT-ND3 | Nuclear Factor, Erythroid 2 Like 2                                                      | Protein Coding | 33 | GCMTTP010061 | 25.74694 | <a href="https://www.genecards.org/cgi-bin/carddisp.pl?gene=MT-ND3">https://www.genecards.org/cgi-bin/carddisp.pl?gene=MT-ND3</a> |
| NFE2L2 | Cyclin Dependent Kinase Inhibitor 1B                                                    | Protein Coding | 50 | GC02M177227  | 25.7454  | <a href="https://www.genecards.org/cgi-bin/carddisp.pl?gene=NFE2L2">https://www.genecards.org/cgi-bin/carddisp.pl?gene=NFE2L2</a> |
| CDKN1B | NFKB Inhibitor Alpha                                                                    | Protein Coding | 48 | GC12P012722  | 25.70904 | <a href="https://www.genecards.org/cgi-bin/carddisp.pl?gene=CDKN1B">https://www.genecards.org/cgi-bin/carddisp.pl?gene=CDKN1B</a> |
| NFKBIA | H19 Imprinted Maternally Expressed Transcript                                           | Protein Coding | 51 | GC14M035401  | 25.69777 | <a href="https://www.genecards.org/cgi-bin/carddisp.pl?gene=NFKBIA">https://www.genecards.org/cgi-bin/carddisp.pl?gene=NFKBIA</a> |
| H19    | NADH:Ubiquinone Oxidoreductase Core Subunit V1                                          | RNA Gene       | 28 | GC11M001995  | 25.68446 | <a href="https://www.genecards.org/cgi-bin/carddisp.pl?gene=H19">https://www.genecards.org/cgi-bin/carddisp.pl?gene=H19</a>       |
| NDUFV1 | Mitochondrially Encoded NADH:Ubiquinone Oxidoreductase Core Subunit 6                   | Protein Coding | 47 | GC11P067670  | 25.68073 | <a href="https://www.genecards.org/cgi-bin/carddisp.pl?gene=NDUFV1">https://www.genecards.org/cgi-bin/carddisp.pl?gene=NDUFV1</a> |
| MT-ND6 | Interferon Alpha 2                                                                      | Protein Coding | 33 | GCMTM014151  | 25.66519 | <a href="https://www.genecards.org/cgi-bin/carddisp.pl?gene=MT-ND6">https://www.genecards.org/cgi-bin/carddisp.pl?gene=MT-ND6</a> |
| IFNA2  | Keratin 7                                                                               | Protein Coding | 41 | GC09M021384  | 25.65508 | <a href="https://www.genecards.org/cgi-bin/carddisp.pl?gene=IFNA2">https://www.genecards.org/cgi-bin/carddisp.pl?gene=IFNA2</a>   |
| KRT7   |                                                                                         | Protein Coding | 43 | GC12P052232  | 25.65355 | <a href="https://www.genecards.org/cgi-bin/carddisp.pl?gene=KRT7">https://www.genecards.org/cgi-bin/carddisp.pl?gene=KRT7</a>     |

|        |                                                |                |    |             |          |                                                                                                                                   |
|--------|------------------------------------------------|----------------|----|-------------|----------|-----------------------------------------------------------------------------------------------------------------------------------|
| OTC    | Ornithine Transcarbamylase                     | Protein Coding | 48 | GC0XP038353 | 25.65215 | <a href="https://www.genecards.org/cgi-bin/carddisp.pl?gene=OTC">https://www.genecards.org/cgi-bin/carddisp.pl?gene=OTC</a>       |
| NR1I2  | Nuclear Receptor Subfamily 1 Group I Member 2  | Protein Coding | 47 | GC03P119780 | 25.61819 | <a href="https://www.genecards.org/cgi-bin/carddisp.pl?gene=NR1I2">https://www.genecards.org/cgi-bin/carddisp.pl?gene=NR1I2</a>   |
| SHH    | Sonic Hedgehog Signaling Molecule              | Protein Coding | 50 | GC07M155799 | 25.60373 | <a href="https://www.genecards.org/cgi-bin/carddisp.pl?gene=SHH">https://www.genecards.org/cgi-bin/carddisp.pl?gene=SHH</a>       |
| KRT19  | Keratin 19                                     | Protein Coding | 46 | GC17M041523 | 25.59081 | <a href="https://www.genecards.org/cgi-bin/carddisp.pl?gene=KRT19">https://www.genecards.org/cgi-bin/carddisp.pl?gene=KRT19</a>   |
| COL4A5 | Collagen Type IV Alpha 5 Chain                 | Protein Coding | 44 | GC0XP108439 | 25.56473 | <a href="https://www.genecards.org/cgi-bin/carddisp.pl?gene=COL4A5">https://www.genecards.org/cgi-bin/carddisp.pl?gene=COL4A5</a> |
| PRSS1  | Serine Protease 1                              | Protein Coding | 47 | GC07P145775 | 25.55352 | <a href="https://www.genecards.org/cgi-bin/carddisp.pl?gene=PRSS1">https://www.genecards.org/cgi-bin/carddisp.pl?gene=PRSS1</a>   |
| AGPAT2 | 1-Acylglycerol-3-Phosphate O-Acyltransferase 2 | Protein Coding | 47 | GC09M136673 | 25.49581 | <a href="https://www.genecards.org/cgi-bin/carddisp.pl?gene=AGPAT2">https://www.genecards.org/cgi-bin/carddisp.pl?gene=AGPAT2</a> |
| FGF2   | Fibroblast Growth Factor 2                     | Protein Coding | 48 | GC04P122826 | 25.4317  | <a href="https://www.genecards.org/cgi-bin/carddisp.pl?gene=FGF2">https://www.genecards.org/cgi-bin/carddisp.pl?gene=FGF2</a>     |
| CCK    | Cholecystokinin                                | Protein Coding | 43 | GC03M042274 | 25.3374  | <a href="https://www.genecards.org/cgi-bin/carddisp.pl?gene=CCK">https://www.genecards.org/cgi-bin/carddisp.pl?gene=CCK</a>       |
| CD34   | CD34 Molecule                                  | Protein Coding | 44 | GC01M207880 | 25.33303 | <a href="https://www.genecards.org/cgi-bin/carddisp.pl?gene=CD34">https://www.genecards.org/cgi-bin/carddisp.pl?gene=CD34</a>     |
| ADRB2  | Adrenoceptor Beta 2                            | Protein Coding | 50 | GC05P148825 | 25.30973 | <a href="https://www.genecards.org/cgi-bin/carddisp.pl?gene=ADRB2">https://www.genecards.org/cgi-bin/carddisp.pl?gene=ADRB2</a>   |
| ATF4   | Activating Transcription Factor 4              | Protein Coding | 47 | GC22P039547 | 25.30847 | <a href="https://www.genecards.org/cgi-bin/carddisp.pl?gene=ATF4">https://www.genecards.org/cgi-bin/carddisp.pl?gene=ATF4</a>     |
| SAG    | S-Antigen Visual Arrestin                      | Protein Coding | 45 | GC02P233328 | 25.30161 | <a href="https://www.genecards.org/cgi-bin/carddisp.pl?gene=SAG">https://www.genecards.org/cgi-bin/carddisp.pl?gene=SAG</a>       |
| C4A    | Complement C4A (Rodgers Blood Group)           | Protein Coding | 44 | GC06P055224 | 25.29449 | <a href="https://www.genecards.org/cgi-bin/carddisp.pl?gene=C4A">https://www.genecards.org/cgi-bin/carddisp.pl?gene=C4A</a>       |
| XDH    | Xanthine Dehydrogenase                         | Protein Coding | 47 | GC02M031334 | 25.29173 | <a href="https://www.genecards.org/cgi-bin/carddisp.pl?gene=XDH">https://www.genecards.org/cgi-bin/carddisp.pl?gene=XDH</a>       |
| A2M    | Alpha-2-Macroglobulin PMS1                     | Protein Coding | 47 | GC12M009067 | 25.28257 | <a href="https://www.genecards.org/cgi-bin/carddisp.pl?gene=A2M">https://www.genecards.org/cgi-bin/carddisp.pl?gene=A2M</a>       |
| PMS2   | Homolog 2, Mismatch Repair System Component    | Protein Coding | 49 | GC07M005973 | 25.28156 | <a href="https://www.genecards.org/cgi-bin/carddisp.pl?gene=PMS2">https://www.genecards.org/cgi-bin/carddisp.pl?gene=PMS2</a>     |
| OCRL   | OCRL Inositol Polyphosphate -5-Phosphatase     | Protein Coding | 45 | GC0XP129539 | 25.27095 | <a href="https://www.genecards.org/cgi-bin/carddisp.pl?gene=OCRL">https://www.genecards.org/cgi-bin/carddisp.pl?gene=OCRL</a>     |

|         |                                                    |                |    |             |          |                                                                                                                                     |
|---------|----------------------------------------------------|----------------|----|-------------|----------|-------------------------------------------------------------------------------------------------------------------------------------|
| FGF23   | Fibroblast Growth Factor 23                        | Protein Coding | 46 | GC12M004368 | 25.26514 | <a href="https://www.genecards.org/cgi-bin/carddisp.pl?gene=FGF23">https://www.genecards.org/cgi-bin/carddisp.pl?gene=FGF23</a>     |
| ALDH1A1 | Aldehyde Dehydrogenase 1 Family Member A1          | Protein Coding | 48 | GC09M072900 | 25.25164 | <a href="https://www.genecards.org/cgi-bin/carddisp.pl?gene=ALDH1A1">https://www.genecards.org/cgi-bin/carddisp.pl?gene=ALDH1A1</a> |
| COL7A1  | Collagen Type VII Alpha 1 Chain                    | Protein Coding | 45 | GC03M048564 | 25.24354 | <a href="https://www.genecards.org/cgi-bin/carddisp.pl?gene=COL7A1">https://www.genecards.org/cgi-bin/carddisp.pl?gene=COL7A1</a>   |
| TLR5    | Toll Like Receptor 5 Bone                          | Protein Coding | 48 | GC01M223132 | 25.23612 | <a href="https://www.genecards.org/cgi-bin/carddisp.pl?gene=TLR5">https://www.genecards.org/cgi-bin/carddisp.pl?gene=TLR5</a>       |
| BMPR2   | Morphogenetic Protein Receptor Type 2              | Protein Coding | 50 | GC02P202376 | 25.21325 | <a href="https://www.genecards.org/cgi-bin/carddisp.pl?gene=BMPR2">https://www.genecards.org/cgi-bin/carddisp.pl?gene=BMPR2</a>     |
| RHO     | Rhodopsin                                          | Protein Coding | 48 | GC03P131457 | 25.18714 | <a href="https://www.genecards.org/cgi-bin/carddisp.pl?gene=RHO">https://www.genecards.org/cgi-bin/carddisp.pl?gene=RHO</a>         |
| GLUL    | Glutamate-Ammonia Ligase                           | Protein Coding | 50 | GC01M182378 | 25.17989 | <a href="https://www.genecards.org/cgi-bin/carddisp.pl?gene=GLUL">https://www.genecards.org/cgi-bin/carddisp.pl?gene=GLUL</a>       |
| KRT5    | Keratin 5                                          | Protein Coding | 48 | GC12M052514 | 25.13056 | <a href="https://www.genecards.org/cgi-bin/carddisp.pl?gene=KRT5">https://www.genecards.org/cgi-bin/carddisp.pl?gene=KRT5</a>       |
| ABL1    | ABL Proto-Oncogene 1, Non-Receptor Tyrosine Kinase | Protein Coding | 53 | GC09P130713 | 25.09013 | <a href="https://www.genecards.org/cgi-bin/carddisp.pl?gene=ABL1">https://www.genecards.org/cgi-bin/carddisp.pl?gene=ABL1</a>       |
| CD28    | CD28 Molecule                                      | Protein Coding | 47 | GC02P203706 | 25.08379 | <a href="https://www.genecards.org/cgi-bin/carddisp.pl?gene=CD28">https://www.genecards.org/cgi-bin/carddisp.pl?gene=CD28</a>       |
| NAMPT   | Nicotinamide Phosphoribosyl transferase            | Protein Coding | 48 | GC07M106248 | 25.07551 | <a href="https://www.genecards.org/cgi-bin/carddisp.pl?gene=NAMPT">https://www.genecards.org/cgi-bin/carddisp.pl?gene=NAMPT</a>     |
| HSPA4   | Heat Shock Protein Family A (Hsp70) Member 4       | Protein Coding | 43 | GC05P133051 | 25.06934 | <a href="https://www.genecards.org/cgi-bin/carddisp.pl?gene=HSPA4">https://www.genecards.org/cgi-bin/carddisp.pl?gene=HSPA4</a>     |
| MIR200C | MicroRNA 200c                                      | RNA Gene       | 21 | GC12P011871 | 25.04626 | <a href="https://www.genecards.org/cgi-bin/carddisp.pl?gene=MIR200C">https://www.genecards.org/cgi-bin/carddisp.pl?gene=MIR200C</a> |
| ATRX    | ATRX Chromatin Remodeler                           | Protein Coding | 47 | GC0XM077504 | 25.04457 | <a href="https://www.genecards.org/cgi-bin/carddisp.pl?gene=ATRX">https://www.genecards.org/cgi-bin/carddisp.pl?gene=ATRX</a>       |
| FGA     | Fibrinogen Alpha Chain Triggering                  | Protein Coding | 48 | GC04M154583 | 25.01811 | <a href="https://www.genecards.org/cgi-bin/carddisp.pl?gene=FGA">https://www.genecards.org/cgi-bin/carddisp.pl?gene=FGA</a>         |
| TREM2   | Receptor Expressed On Myeloid Cells 2              | Protein Coding | 43 | GC06M047080 | 25.00278 | <a href="https://www.genecards.org/cgi-bin/carddisp.pl?gene=TREM2">https://www.genecards.org/cgi-bin/carddisp.pl?gene=TREM2</a>     |
| UROD    | Uroporphyrinogen Decarboxylase                     | Protein Coding | 46 | GC01P045023 | 24.99612 | <a href="https://www.genecards.org/cgi-bin/carddisp.pl?gene=UROD">https://www.genecards.org/cgi-bin/carddisp.pl?gene=UROD</a>       |
| FTL     | Ferritin Light Chain                               | Protein Coding | 48 | GC19P048965 | 24.99425 | <a href="https://www.genecards.org/cgi-bin/carddisp.pl?gene=FTL">https://www.genecards.org/cgi-bin/carddisp.pl?gene=FTL</a>         |
| SMN1    | Survival Of Motor Neuron 1, Telomeric              | Protein Coding | 42 | GC05P070924 | 24.97404 | <a href="https://www.genecards.org/cgi-bin/carddisp.pl?gene=SMN1">https://www.genecards.org/cgi-bin/carddisp.pl?gene=SMN1</a>       |

|          |                                                                                           |                   |    |             |          |                                                                                                                                       |
|----------|-------------------------------------------------------------------------------------------|-------------------|----|-------------|----------|---------------------------------------------------------------------------------------------------------------------------------------|
| STK11    | Serine/Threonine Kinase 11<br>Insulin Like                                                | Protein<br>Coding | 50 | GC19P001177 | 24.973   | <a href="https://www.genecards.org/cgi-bin/carddisp.pl?gene=STK11">https://www.genecards.org/cgi-bin/carddisp.pl?gene=STK11</a>       |
| IGFBP1   | Growth Factor Binding Protein 1                                                           | Protein<br>Coding | 44 | GC07P046838 | 24.9713  | <a href="https://www.genecards.org/cgi-bin/carddisp.pl?gene=IGFBP1">https://www.genecards.org/cgi-bin/carddisp.pl?gene=IGFBP1</a>     |
| FKRP     | Fukutin Related Protein                                                                   | Protein<br>Coding | 41 | GC19P046746 | 24.95414 | <a href="https://www.genecards.org/cgi-bin/carddisp.pl?gene=FKRP">https://www.genecards.org/cgi-bin/carddisp.pl?gene=FKRP</a>         |
| TFRC     | Transferrin Receptor<br>Glucosamine (UDP-N-Acetyl)-2-Epimerase/N-Acetylmannosamine Kinase | Protein<br>Coding | 49 | GC03M196027 | 24.94923 | <a href="https://www.genecards.org/cgi-bin/carddisp.pl?gene=TFRC">https://www.genecards.org/cgi-bin/carddisp.pl?gene=TFRC</a>         |
| GNE      | Cytochrome P450 Family 19 Subfamily A Member 1                                            | Protein<br>Coding | 44 | GC09M036214 | 24.94873 | <a href="https://www.genecards.org/cgi-bin/carddisp.pl?gene=GNE">https://www.genecards.org/cgi-bin/carddisp.pl?gene=GNE</a>           |
| CYP19A1  | Insulin Like Growth Factor Binding Protein 3                                              | Protein<br>Coding | 50 | GC15M051208 | 24.94394 | <a href="https://www.genecards.org/cgi-bin/carddisp.pl?gene=CYP19A1">https://www.genecards.org/cgi-bin/carddisp.pl?gene=CYP19A1</a>   |
| IGFBP3   | Cathepsin B                                                                               | Protein<br>Coding | 45 | GC07M045912 | 24.93682 | <a href="https://www.genecards.org/cgi-bin/carddisp.pl?gene=IGFBP3">https://www.genecards.org/cgi-bin/carddisp.pl?gene=IGFBP3</a>     |
| CTSB     | Arginine Vasopressin                                                                      | Protein<br>Coding | 51 | GC08M011842 | 24.92962 | <a href="https://www.genecards.org/cgi-bin/carddisp.pl?gene=CTSB">https://www.genecards.org/cgi-bin/carddisp.pl?gene=CTSB</a>         |
| AVP      | Free Fatty Acid Receptor 4                                                                | Protein<br>Coding | 47 | GC20M003082 | 24.90945 | <a href="https://www.genecards.org/cgi-bin/carddisp.pl?gene=AVP">https://www.genecards.org/cgi-bin/carddisp.pl?gene=AVP</a>           |
| FFAR4    | Secretory Leukocyte Peptidase Inhibitor                                                   | Protein<br>Coding | 39 | GC10P093566 | 24.85429 | <a href="https://www.genecards.org/cgi-bin/carddisp.pl?gene=FFAR4">https://www.genecards.org/cgi-bin/carddisp.pl?gene=FFAR4</a>       |
| SLPI     | Microtubule Associated Scaffold Protein 1                                                 | Protein<br>Coding | 40 | GC20M045252 | 24.80633 | <a href="https://www.genecards.org/cgi-bin/carddisp.pl?gene=SLPI">https://www.genecards.org/cgi-bin/carddisp.pl?gene=SLPI</a>         |
| MTUS1    | SOS Ras/Rac Guanine Nucleotide Exchange Factor 1                                          | Protein<br>Coding | 37 | GC08M017643 | 24.78032 | <a href="https://www.genecards.org/cgi-bin/carddisp.pl?gene=MTUS1">https://www.genecards.org/cgi-bin/carddisp.pl?gene=MTUS1</a>       |
| SOS1     | Autoimmune Regulator                                                                      | Protein<br>Coding | 49 | GC02M038981 | 24.74988 | <a href="https://www.genecards.org/cgi-bin/carddisp.pl?gene=SOS1">https://www.genecards.org/cgi-bin/carddisp.pl?gene=SOS1</a>         |
| AIRE     | ERCC Excision Repair 2, TFIIH Core Complex Helicase Subunit                               | Protein<br>Coding | 45 | GC21P044285 | 24.74964 | <a href="https://www.genecards.org/cgi-bin/carddisp.pl?gene=AIRE">https://www.genecards.org/cgi-bin/carddisp.pl?gene=AIRE</a>         |
| ERCC2    | Transmembrane Protein 216                                                                 | Protein<br>Coding | 48 | GC19M045349 | 24.74029 | <a href="https://www.genecards.org/cgi-bin/carddisp.pl?gene=ERCC2">https://www.genecards.org/cgi-bin/carddisp.pl?gene=ERCC2</a>       |
| TMEM216  | Thyroglobulin                                                                             | Protein<br>Coding | 36 | GC11P061391 | 24.72112 | <a href="https://www.genecards.org/cgi-bin/carddisp.pl?gene=TMEM216">https://www.genecards.org/cgi-bin/carddisp.pl?gene=TMEM216</a>   |
| TG       | MicroRNA Let-7d                                                                           | RNA<br>Gene       | 43 | GC08P132866 | 24.70642 | <a href="https://www.genecards.org/cgi-bin/carddisp.pl?gene=TG">https://www.genecards.org/cgi-bin/carddisp.pl?gene=TG</a>             |
| MIRLET7D |                                                                                           |                   | 21 | GC09P094178 | 24.70107 | <a href="https://www.genecards.org/cgi-bin/carddisp.pl?gene=MIRLET7D">https://www.genecards.org/cgi-bin/carddisp.pl?gene=MIRLET7D</a> |



|         |                                                                        |                |    |             |          |                                                                                                                                     |
|---------|------------------------------------------------------------------------|----------------|----|-------------|----------|-------------------------------------------------------------------------------------------------------------------------------------|
| TLR3    | Toll Like Receptor 3                                                   | Protein Coding | 52 | GC04P186059 | 24.66375 | <a href="https://www.genecards.org/cgi-bin/carddisp.pl?gene=TLR3">https://www.genecards.org/cgi-bin/carddisp.pl?gene=TLR3</a>       |
| CLU     | Clusterin                                                              | Protein Coding | 47 | GC08M027596 | 24.64778 | <a href="https://www.genecards.org/cgi-bin/carddisp.pl?gene=CLU">https://www.genecards.org/cgi-bin/carddisp.pl?gene=CLU</a>         |
| TFAM    | Transcription Factor A, Mitochondrial                                  | Protein Coding | 45 | GC10P058385 | 24.63551 | <a href="https://www.genecards.org/cgi-bin/carddisp.pl?gene=TFAM">https://www.genecards.org/cgi-bin/carddisp.pl?gene=TFAM</a>       |
| FFAR2   | Free Fatty Acid Receptor 2                                             | Protein Coding | 41 | GC19P040347 | 24.5946  | <a href="https://www.genecards.org/cgi-bin/carddisp.pl?gene=FFAR2">https://www.genecards.org/cgi-bin/carddisp.pl?gene=FFAR2</a>     |
| UGT1A8  | UDP Glucuronosyltransferase Family 1 Member A8                         | Protein Coding | 36 | GC02P233618 | 24.59324 | <a href="https://www.genecards.org/cgi-bin/carddisp.pl?gene=UGT1A8">https://www.genecards.org/cgi-bin/carddisp.pl?gene=UGT1A8</a>   |
| FECH    | Ferrochelatase                                                         | Protein Coding | 47 | GC18M057544 | 24.57081 | <a href="https://www.genecards.org/cgi-bin/carddisp.pl?gene=FECH">https://www.genecards.org/cgi-bin/carddisp.pl?gene=FECH</a>       |
| PAH     | Phenylalanine Hydroxylase                                              | Protein Coding | 49 | GC12M102836 | 24.5406  | <a href="https://www.genecards.org/cgi-bin/carddisp.pl?gene=PAH">https://www.genecards.org/cgi-bin/carddisp.pl?gene=PAH</a>         |
| CSTB    | Cystatin B                                                             | Protein Coding | 47 | GC21M043772 | 24.53864 | <a href="https://www.genecards.org/cgi-bin/carddisp.pl?gene=CSTB">https://www.genecards.org/cgi-bin/carddisp.pl?gene=CSTB</a>       |
| SREBF2  | Sterol Regulatory Element Binding Transcription Factor 2               | Protein Coding | 43 | GC22P041833 | 24.51161 | <a href="https://www.genecards.org/cgi-bin/carddisp.pl?gene=SREBF2">https://www.genecards.org/cgi-bin/carddisp.pl?gene=SREBF2</a>   |
| AIFM1   | Apoptosis Inducing Factor Mitochondria Associated 1                    | Protein Coding | 50 | GC0XM130129 | 24.51155 | <a href="https://www.genecards.org/cgi-bin/carddisp.pl?gene=AIFM1">https://www.genecards.org/cgi-bin/carddisp.pl?gene=AIFM1</a>     |
| TBP     | TATA-Box Binding Protein                                               | Protein Coding | 49 | GC06P170554 | 24.50735 | <a href="https://www.genecards.org/cgi-bin/carddisp.pl?gene=TBP">https://www.genecards.org/cgi-bin/carddisp.pl?gene=TBP</a>         |
| SRC     | SRC Proto-Oncogene, Non-Receptor Tyrosine Kinase                       | Protein Coding | 52 | GC20P037344 | 24.50633 | <a href="https://www.genecards.org/cgi-bin/carddisp.pl?gene=SRC">https://www.genecards.org/cgi-bin/carddisp.pl?gene=SRC</a>         |
| POMGNT1 | Protein O-Linked Mannose N-Acetylglucosaminyltransferase 1 (Beta 1,2-) | Protein Coding | 45 | GC01M046188 | 24.46222 | <a href="https://www.genecards.org/cgi-bin/carddisp.pl?gene=POMGNT1">https://www.genecards.org/cgi-bin/carddisp.pl?gene=POMGNT1</a> |
| ACOX2   | Acyl-CoA Oxidase 2                                                     | Protein Coding | 44 | GC03M058490 | 24.44621 | <a href="https://www.genecards.org/cgi-bin/carddisp.pl?gene=ACOX2">https://www.genecards.org/cgi-bin/carddisp.pl?gene=ACOX2</a>     |
| CHEK2   | Checkpoint Kinase 2                                                    | Protein Coding | 54 | GC22M028687 | 24.44594 | <a href="https://www.genecards.org/cgi-bin/carddisp.pl?gene=CHEK2">https://www.genecards.org/cgi-bin/carddisp.pl?gene=CHEK2</a>     |
| RXRA    | Retinoid X Receptor Alpha                                              | Protein Coding | 51 | GC09P134317 | 24.36722 | <a href="https://www.genecards.org/cgi-bin/carddisp.pl?gene=RXRA">https://www.genecards.org/cgi-bin/carddisp.pl?gene=RXRA</a>       |
| ITCH    | Itchy E3 Ubiquitin Protein Ligase                                      | Protein Coding | 46 | GC20P034363 | 24.35444 | <a href="https://www.genecards.org/cgi-bin/carddisp.pl?gene=ITCH">https://www.genecards.org/cgi-bin/carddisp.pl?gene=ITCH</a>       |

|          |                                                          |                |    |             |          |                                                                                                                                       |
|----------|----------------------------------------------------------|----------------|----|-------------|----------|---------------------------------------------------------------------------------------------------------------------------------------|
| UGT1A9   | UDP<br>Glucuronosyltransferase Family 1 Member A9        | Protein Coding | 44 | GC02P233671 | 24.33155 | <a href="https://www.genecards.org/cgi-bin/carddisp.pl?gene=UGT1A9">https://www.genecards.org/cgi-bin/carddisp.pl?gene=UGT1A9</a>     |
| ACTA1    | Actin Alpha 1, Skeletal Muscle                           | Protein Coding | 48 | GC01M229431 | 24.2884  | <a href="https://www.genecards.org/cgi-bin/carddisp.pl?gene=ACTA1">https://www.genecards.org/cgi-bin/carddisp.pl?gene=ACTA1</a>       |
| DRD4     | Dopamine Receptor D4                                     | Protein Coding | 47 | GC11P000979 | 24.28248 | <a href="https://www.genecards.org/cgi-bin/carddisp.pl?gene=DRD4">https://www.genecards.org/cgi-bin/carddisp.pl?gene=DRD4</a>         |
| COL4A4   | Collagen Type IV Alpha 4 Chain                           | Protein Coding | 44 | GC02M226971 | 24.27524 | <a href="https://www.genecards.org/cgi-bin/carddisp.pl?gene=COL4A4">https://www.genecards.org/cgi-bin/carddisp.pl?gene=COL4A4</a>     |
| CXCL10   | C-X-C Motif Chemokine Ligand 10                          | Protein Coding | 45 | GC04M076021 | 24.26254 | <a href="https://www.genecards.org/cgi-bin/carddisp.pl?gene=CXCL10">https://www.genecards.org/cgi-bin/carddisp.pl?gene=CXCL10</a>     |
| TBX5     | T-Box Transcription Factor 5                             | Protein Coding | 47 | GC12M114353 | 24.25562 | <a href="https://www.genecards.org/cgi-bin/carddisp.pl?gene=TBX5">https://www.genecards.org/cgi-bin/carddisp.pl?gene=TBX5</a>         |
| MALAT1   | Metastasis Associated Lung Adenocarcinoma Transcript 1   | RNA Gene       | 23 | GC11P066225 | 24.24067 | <a href="https://www.genecards.org/cgi-bin/carddisp.pl?gene=MALAT1">https://www.genecards.org/cgi-bin/carddisp.pl?gene=MALAT1</a>     |
| IFIH1    | Interferon Induced With Helicase C Domain 1              | Protein Coding | 48 | GC02M162267 | 24.21241 | <a href="https://www.genecards.org/cgi-bin/carddisp.pl?gene=IFIH1">https://www.genecards.org/cgi-bin/carddisp.pl?gene=IFIH1</a>       |
| RB1      | RB Transcriptional Corepressor 1                         | Protein Coding | 49 | GC13P048303 | 24.19917 | <a href="https://www.genecards.org/cgi-bin/carddisp.pl?gene=RB1">https://www.genecards.org/cgi-bin/carddisp.pl?gene=RB1</a>           |
| CYP2B6   | Cytochrome P450 Family 2 Subfamily B Member 6            | Protein Coding | 48 | GC19P040991 | 24.1731  | <a href="https://www.genecards.org/cgi-bin/carddisp.pl?gene=CYP2B6">https://www.genecards.org/cgi-bin/carddisp.pl?gene=CYP2B6</a>     |
| EIF2S1   | Eukaryotic Translation Initiation Factor 2 Subunit Alpha | Protein Coding | 45 | GC14P067359 | 24.17068 | <a href="https://www.genecards.org/cgi-bin/carddisp.pl?gene=EIF2S1">https://www.genecards.org/cgi-bin/carddisp.pl?gene=EIF2S1</a>     |
| TGFBR1   | Transforming Growth Factor Beta Receptor 1               | Protein Coding | 54 | GC09P099104 | 24.16077 | <a href="https://www.genecards.org/cgi-bin/carddisp.pl?gene=TGFBR1">https://www.genecards.org/cgi-bin/carddisp.pl?gene=TGFBR1</a>     |
| MIRLET7C | MicroRNA Let-7c                                          | RNA Gene       | 22 | GC21P016551 | 24.12523 | <a href="https://www.genecards.org/cgi-bin/carddisp.pl?gene=MIRLET7C">https://www.genecards.org/cgi-bin/carddisp.pl?gene=MIRLET7C</a> |
| EPCAM    | Epithelial Cell Adhesion Molecule                        | Protein Coding | 48 | GC02P047345 | 24.09324 | <a href="https://www.genecards.org/cgi-bin/carddisp.pl?gene=EPCAM">https://www.genecards.org/cgi-bin/carddisp.pl?gene=EPCAM</a>       |
| STAT5B   | Signal Transducer And Activator Of Transcription 5B      | Protein Coding | 50 | GC17M042199 | 24.09065 | <a href="https://www.genecards.org/cgi-bin/carddisp.pl?gene=STAT5B">https://www.genecards.org/cgi-bin/carddisp.pl?gene=STAT5B</a>     |
| TYR      | Tyrosinase                                               | Protein Coding | 48 | GC11P089177 | 24.0699  | <a href="https://www.genecards.org/cgi-bin/carddisp.pl?gene=TYR">https://www.genecards.org/cgi-bin/carddisp.pl?gene=TYR</a>           |

|        |                                                            |                |    |             |          |                                                                                                                                   |
|--------|------------------------------------------------------------|----------------|----|-------------|----------|-----------------------------------------------------------------------------------------------------------------------------------|
| DNMT1  | DNA Methyltransferase 1                                    | Protein Coding | 51 | GC19M010133 | 24.05653 | <a href="https://www.genecards.org/cgi-bin/carddisp.pl?gene=DNMT1">https://www.genecards.org/cgi-bin/carddisp.pl?gene=DNMT1</a>   |
| CYP1B1 | Cytochrome P450 Family 1 Subfamily B Member 1              | Protein Coding | 49 | GC02M038066 | 24.00853 | <a href="https://www.genecards.org/cgi-bin/carddisp.pl?gene=CYP1B1">https://www.genecards.org/cgi-bin/carddisp.pl?gene=CYP1B1</a> |
| BBS10  | Bardet-Biedl Syndrome 10                                   | Protein Coding | 41 | GC12M076344 | 23.99728 | <a href="https://www.genecards.org/cgi-bin/carddisp.pl?gene=BBS10">https://www.genecards.org/cgi-bin/carddisp.pl?gene=BBS10</a>   |
| MTM1   | Myotubularin 1                                             | Protein Coding | 45 | GC0XP150562 | 23.9802  | <a href="https://www.genecards.org/cgi-bin/carddisp.pl?gene=MTM1">https://www.genecards.org/cgi-bin/carddisp.pl?gene=MTM1</a>     |
| CRH    | Corticotropin Releasing Hormone                            | Protein Coding | 44 | GC08M066176 | 23.97061 | <a href="https://www.genecards.org/cgi-bin/carddisp.pl?gene=CRH">https://www.genecards.org/cgi-bin/carddisp.pl?gene=CRH</a>       |
| GJC2   | Gap Junction Protein Gamma 2                               | Protein Coding | 42 | GC01P228471 | 23.95737 | <a href="https://www.genecards.org/cgi-bin/carddisp.pl?gene=GJC2">https://www.genecards.org/cgi-bin/carddisp.pl?gene=GJC2</a>     |
| DBH    | Dopamine Beta-Hydroxylase                                  | Protein Coding | 51 | GC09P133636 | 23.94764 | <a href="https://www.genecards.org/cgi-bin/carddisp.pl?gene=DBH">https://www.genecards.org/cgi-bin/carddisp.pl?gene=DBH</a>       |
| SPTLC1 | Serine Palmitoyltransferase Long Chain Base Subunit 1      | Protein Coding | 47 | GC09M092002 | 23.94386 | <a href="https://www.genecards.org/cgi-bin/carddisp.pl?gene=SPTLC1">https://www.genecards.org/cgi-bin/carddisp.pl?gene=SPTLC1</a> |
| IDH1   | Isocitrate Dehydrogenase (NADP(+)) 1                       | Protein Coding | 53 | GC02M208236 | 23.92354 | <a href="https://www.genecards.org/cgi-bin/carddisp.pl?gene=IDH1">https://www.genecards.org/cgi-bin/carddisp.pl?gene=IDH1</a>     |
| CD40   | CD40 Molecule                                              | Protein Coding | 48 | GC20P046118 | 23.91717 | <a href="https://www.genecards.org/cgi-bin/carddisp.pl?gene=CD40">https://www.genecards.org/cgi-bin/carddisp.pl?gene=CD40</a>     |
| STAT4  | Signal Transducer And Activator Of Transcription 4         | Protein Coding | 47 | GC02M191029 | 23.90696 | <a href="https://www.genecards.org/cgi-bin/carddisp.pl?gene=STAT4">https://www.genecards.org/cgi-bin/carddisp.pl?gene=STAT4</a>   |
| CXCR4  | C-X-C Motif Chemokine Receptor 4                           | Protein Coding | 52 | GC02M136114 | 23.90555 | <a href="https://www.genecards.org/cgi-bin/carddisp.pl?gene=CXCR4">https://www.genecards.org/cgi-bin/carddisp.pl?gene=CXCR4</a>   |
| BBS1   | Bardet-Biedl Syndrome 1                                    | Protein Coding | 38 | GC11P066772 | 23.9034  | <a href="https://www.genecards.org/cgi-bin/carddisp.pl?gene=BBS1">https://www.genecards.org/cgi-bin/carddisp.pl?gene=BBS1</a>     |
| KL     | Klotho                                                     | Protein Coding | 46 | GC13P033016 | 23.86306 | <a href="https://www.genecards.org/cgi-bin/carddisp.pl?gene=KL">https://www.genecards.org/cgi-bin/carddisp.pl?gene=KL</a>         |
| SDHC   | Succinate Dehydrogenase Complex Subunit C                  | Protein Coding | 45 | GC01P161314 | 23.86123 | <a href="https://www.genecards.org/cgi-bin/carddisp.pl?gene=SDHC">https://www.genecards.org/cgi-bin/carddisp.pl?gene=SDHC</a>     |
| ERCC1  | ERCC Excision Repair 1, Endonuclease Non-Catalytic Subunit | Protein Coding | 47 | GC19M046972 | 23.84486 | <a href="https://www.genecards.org/cgi-bin/carddisp.pl?gene=ERCC1">https://www.genecards.org/cgi-bin/carddisp.pl?gene=ERCC1</a>   |
| PRODH  | Proline Dehydrogenase 1                                    | Protein Coding | 47 | GC22M018912 | 23.80731 | <a href="https://www.genecards.org/cgi-bin/carddisp.pl?gene=PRODH">https://www.genecards.org/cgi-bin/carddisp.pl?gene=PRODH</a>   |
| PRTN3  | Proteinase 3                                               | Protein Coding | 45 | GC19P000840 | 23.80523 | <a href="https://www.genecards.org/cgi-bin/carddisp.pl?gene=PRTN3">https://www.genecards.org/cgi-bin/carddisp.pl?gene=PRTN3</a>   |
| MIR141 | MicroRNA 141                                               | RNA Gene       | 22 | GC12P011872 | 23.80027 | <a href="https://www.genecards.org/cgi-bin/carddisp.pl?gene=MIR141">https://www.genecards.org/cgi-bin/carddisp.pl?gene=MIR141</a> |

|         |                                                             |                |    |             |          |                                                                                                                                     |
|---------|-------------------------------------------------------------|----------------|----|-------------|----------|-------------------------------------------------------------------------------------------------------------------------------------|
| MAOB    | Monoamine Oxidase B                                         | Protein Coding | 44 | GC0XM043766 | 23.80009 | <a href="https://www.genecards.org/cgi-bin/carddisp.pl?gene=MAOB">https://www.genecards.org/cgi-bin/carddisp.pl?gene=MAOB</a>       |
| CYP4A11 | Cytochrome P450 Family 4 Subfamily A Member 11              | Protein Coding | 44 | GC01M046929 | 23.78612 | <a href="https://www.genecards.org/cgi-bin/carddisp.pl?gene=CYP4A11">https://www.genecards.org/cgi-bin/carddisp.pl?gene=CYP4A11</a> |
| SLC25A4 | Solute Carrier Family 25 Member 4 Mitochondrially           | Protein Coding | 50 | GC04P185143 | 23.78164 | <a href="https://www.genecards.org/cgi-bin/carddisp.pl?gene=SLC25A4">https://www.genecards.org/cgi-bin/carddisp.pl?gene=SLC25A4</a> |
| MT-CO2  | Encoded Cytochrome C Oxidase II                             | Protein Coding | 34 | GCMTP007587 | 23.76284 | <a href="https://www.genecards.org/cgi-bin/carddisp.pl?gene=MT-CO2">https://www.genecards.org/cgi-bin/carddisp.pl?gene=MT-CO2</a>   |
| EPHX1   | Epoxide Hydrolase 1                                         | Protein Coding | 48 | GC01P225810 | 23.75412 | <a href="https://www.genecards.org/cgi-bin/carddisp.pl?gene=EPHX1">https://www.genecards.org/cgi-bin/carddisp.pl?gene=EPHX1</a>     |
| TNFSF10 | TNF Superfamily Member 10                                   | Protein Coding | 47 | GC03M172505 | 23.74385 | <a href="https://www.genecards.org/cgi-bin/carddisp.pl?gene=TNFSF10">https://www.genecards.org/cgi-bin/carddisp.pl?gene=TNFSF10</a> |
| DCTN1   | Dynactin Subunit 1                                          | Protein Coding | 47 | GC02M074361 | 23.73948 | <a href="https://www.genecards.org/cgi-bin/carddisp.pl?gene=DCTN1">https://www.genecards.org/cgi-bin/carddisp.pl?gene=DCTN1</a>     |
| UGT1A   | UDP Glucuronosyltransferase Family 1 Member A Complex Locus | Genetic Locus  | 10 | GC02P233592 | 23.72621 | <a href="https://www.genecards.org/cgi-bin/carddisp.pl?gene=UGT1A">https://www.genecards.org/cgi-bin/carddisp.pl?gene=UGT1A</a>     |
| TLR9    | Toll Like Receptor 9                                        | Protein Coding | 45 | GC03M052222 | 23.72428 | <a href="https://www.genecards.org/cgi-bin/carddisp.pl?gene=TLR9">https://www.genecards.org/cgi-bin/carddisp.pl?gene=TLR9</a>       |
| SELP    | Selectin P                                                  | Protein Coding | 46 | GC01M169558 | 23.72334 | <a href="https://www.genecards.org/cgi-bin/carddisp.pl?gene=SELP">https://www.genecards.org/cgi-bin/carddisp.pl?gene=SELP</a>       |
| MAPK3   | Mitogen-Activated Protein Kinase 3                          | Protein Coding | 50 | GC16M031188 | 23.71683 | <a href="https://www.genecards.org/cgi-bin/carddisp.pl?gene=MAPK3">https://www.genecards.org/cgi-bin/carddisp.pl?gene=MAPK3</a>     |
| FUS     | FUS RNA Binding Protein                                     | Protein Coding | 45 | GC16P031180 | 23.71544 | <a href="https://www.genecards.org/cgi-bin/carddisp.pl?gene=FUS">https://www.genecards.org/cgi-bin/carddisp.pl?gene=FUS</a>         |
| CAPN3   | Calpain 3                                                   | Protein Coding | 48 | GC15P042359 | 23.69723 | <a href="https://www.genecards.org/cgi-bin/carddisp.pl?gene=CAPN3">https://www.genecards.org/cgi-bin/carddisp.pl?gene=CAPN3</a>     |
| SHBG    | Sex Hormone Binding Globulin                                | Protein Coding | 41 | GC17P007613 | 23.66805 | <a href="https://www.genecards.org/cgi-bin/carddisp.pl?gene=SHBG">https://www.genecards.org/cgi-bin/carddisp.pl?gene=SHBG</a>       |
| IL12B   | Interleukin 12B                                             | Protein Coding | 44 | GC05M159314 | 23.66675 | <a href="https://www.genecards.org/cgi-bin/carddisp.pl?gene=IL12B">https://www.genecards.org/cgi-bin/carddisp.pl?gene=IL12B</a>     |
| CALCA   | Calcitonin Related Polypeptide Alpha                        | Protein Coding | 43 | GC11M014945 | 23.66144 | <a href="https://www.genecards.org/cgi-bin/carddisp.pl?gene=CALCA">https://www.genecards.org/cgi-bin/carddisp.pl?gene=CALCA</a>     |
| TYMP    | Thymidine Phosphorylase Sep (O-Phosphoserine)               | Protein Coding | 47 | GC22M050525 | 23.65818 | <a href="https://www.genecards.org/cgi-bin/carddisp.pl?gene=TYMP">https://www.genecards.org/cgi-bin/carddisp.pl?gene=TYMP</a>       |
| SEPSECS | TRNA:Sec (Selenocysteine ) TRNA Synthase                    | Protein Coding | 44 | GC04M025121 | 23.65126 | <a href="https://www.genecards.org/cgi-bin/carddisp.pl?gene=SEPSECS">https://www.genecards.org/cgi-bin/carddisp.pl?gene=SEPSECS</a> |
| MDM2    | MDM2 Proto-Oncogene                                         | Protein Coding | 53 | GC12P068808 | 23.63696 | <a href="https://www.genecards.org/cgi-bin/carddisp.pl?gene=MDM2">https://www.genecards.org/cgi-bin/carddisp.pl?gene=MDM2</a>       |

|         |                                          |                |    |             |          |                                                                                                                                     |
|---------|------------------------------------------|----------------|----|-------------|----------|-------------------------------------------------------------------------------------------------------------------------------------|
| CALR    | Calreticulin                             | Protein Coding | 51 | GC19P012938 | 23.61307 | <a href="https://www.genecards.org/cgi-bin/carddisp.pl?gene=CALR">https://www.genecards.org/cgi-bin/carddisp.pl?gene=CALR</a>       |
| TNFSF11 | TNF Superfamily Member 11                | Protein Coding | 48 | GC13P042562 | 23.60391 | <a href="https://www.genecards.org/cgi-bin/carddisp.pl?gene=TNFSF11">https://www.genecards.org/cgi-bin/carddisp.pl?gene=TNFSF11</a> |
| TMEM231 | Transmembrane Protein 231                | Protein Coding | 37 | GC16M075536 | 23.59649 | <a href="https://www.genecards.org/cgi-bin/carddisp.pl?gene=TMEM231">https://www.genecards.org/cgi-bin/carddisp.pl?gene=TMEM231</a> |
| NPPA    | Natriuretic Peptide A                    | Protein Coding | 47 | GC01M011846 | 23.58355 | <a href="https://www.genecards.org/cgi-bin/carddisp.pl?gene=NPPA">https://www.genecards.org/cgi-bin/carddisp.pl?gene=NPPA</a>       |
| ACVRL1  | Activin A Receptor Like Type 1           | Protein Coding | 50 | GC12P051906 | 23.57769 | <a href="https://www.genecards.org/cgi-bin/carddisp.pl?gene=ACVRL1">https://www.genecards.org/cgi-bin/carddisp.pl?gene=ACVRL1</a>   |
| MIR29B1 | MicroRNA 29b-1                           | RNA Gene       | 20 | GC07M130877 | 23.56023 | <a href="https://www.genecards.org/cgi-bin/carddisp.pl?gene=MIR29B1">https://www.genecards.org/cgi-bin/carddisp.pl?gene=MIR29B1</a> |
| TPP1    | Tripeptidyl Peptidase 1                  | Protein Coding | 43 | GC11M006620 | 23.55012 | <a href="https://www.genecards.org/cgi-bin/carddisp.pl?gene=TPP1">https://www.genecards.org/cgi-bin/carddisp.pl?gene=TPP1</a>       |
| PDGFB   | Platelet Derived Growth Factor Subunit B | Protein Coding | 50 | GC22M049027 | 23.53149 | <a href="https://www.genecards.org/cgi-bin/carddisp.pl?gene=PDGFB">https://www.genecards.org/cgi-bin/carddisp.pl?gene=PDGFB</a>     |
| NTRK1   | Neurotrophic Receptor Tyrosine Kinase 1  | Protein Coding | 50 | GC01P156815 | 23.51118 | <a href="https://www.genecards.org/cgi-bin/carddisp.pl?gene=NTRK1">https://www.genecards.org/cgi-bin/carddisp.pl?gene=NTRK1</a>     |
| GATA1   | GATA Binding Protein 1                   | Protein Coding | 47 | GC0XP048786 | 23.48822 | <a href="https://www.genecards.org/cgi-bin/carddisp.pl?gene=GATA1">https://www.genecards.org/cgi-bin/carddisp.pl?gene=GATA1</a>     |
| LCN2    | Lipocalin 2                              | Protein Coding | 44 | GC09P128149 | 23.47865 | <a href="https://www.genecards.org/cgi-bin/carddisp.pl?gene=LCN2">https://www.genecards.org/cgi-bin/carddisp.pl?gene=LCN2</a>       |
| SCO2    | Synthesis Of Cytochrome C Oxidase 2      | Protein Coding | 45 | GC22M050523 | 23.47234 | <a href="https://www.genecards.org/cgi-bin/carddisp.pl?gene=SCO2">https://www.genecards.org/cgi-bin/carddisp.pl?gene=SCO2</a>       |
| MIR24-2 | MicroRNA 24-2                            | RNA Gene       | 18 | GC19M014108 | 23.46977 | <a href="https://www.genecards.org/cgi-bin/carddisp.pl?gene=MIR24-2">https://www.genecards.org/cgi-bin/carddisp.pl?gene=MIR24-2</a> |
| S100B   | S100 Calcium Binding Protein B           | Protein Coding | 46 | GC21M048326 | 23.43947 | <a href="https://www.genecards.org/cgi-bin/carddisp.pl?gene=S100B">https://www.genecards.org/cgi-bin/carddisp.pl?gene=S100B</a>     |
| ERBB4   | Erb-B2 Receptor Tyrosine Kinase 4        | Protein Coding | 55 | GC02M211375 | 23.41989 | <a href="https://www.genecards.org/cgi-bin/carddisp.pl?gene=ERBB4">https://www.genecards.org/cgi-bin/carddisp.pl?gene=ERBB4</a>     |
| MYBPC3  | Myosin Binding Protein C3                | Protein Coding | 47 | GC11M068997 | 23.41675 | <a href="https://www.genecards.org/cgi-bin/carddisp.pl?gene=MYBPC3">https://www.genecards.org/cgi-bin/carddisp.pl?gene=MYBPC3</a>   |
| MVK     | Mevalonate Kinase                        | Protein Coding | 50 | GC12P109573 | 23.37072 | <a href="https://www.genecards.org/cgi-bin/carddisp.pl?gene=MVK">https://www.genecards.org/cgi-bin/carddisp.pl?gene=MVK</a>         |
| MYH9    | Myosin Heavy Chain 9                     | Protein Coding | 50 | GC22M036281 | 23.35895 | <a href="https://www.genecards.org/cgi-bin/carddisp.pl?gene=MYH9">https://www.genecards.org/cgi-bin/carddisp.pl?gene=MYH9</a>       |
| HBA2    | Hemoglobin Subunit Alpha 2               | Protein Coding | 43 | GC16P005491 | 23.35552 | <a href="https://www.genecards.org/cgi-bin/carddisp.pl?gene=HBA2">https://www.genecards.org/cgi-bin/carddisp.pl?gene=HBA2</a>       |
| DGAT2   | Diacylglycerol O-Acyltransferase 2       | Protein Coding | 44 | GC11P075759 | 23.35301 | <a href="https://www.genecards.org/cgi-bin/carddisp.pl?gene=DGAT2">https://www.genecards.org/cgi-bin/carddisp.pl?gene=DGAT2</a>     |

|         |                                                 |                |    |             |          |                                                                                                                                     |
|---------|-------------------------------------------------|----------------|----|-------------|----------|-------------------------------------------------------------------------------------------------------------------------------------|
| POLG2   | DNA Polymerase Gamma 2, Accessory Subunit       | Protein Coding | 42 | GC17M064477 | 23.35107 | <a href="https://www.genecards.org/cgi-bin/carddisp.pl?gene=POLG2">https://www.genecards.org/cgi-bin/carddisp.pl?gene=POLG2</a>     |
| DES     | Desmin                                          | Protein Coding | 48 | GC02P219418 | 23.33959 | <a href="https://www.genecards.org/cgi-bin/carddisp.pl?gene=DES">https://www.genecards.org/cgi-bin/carddisp.pl?gene=DES</a>         |
| KDR     | Kinase Insert Domain Receptor                   | Protein Coding | 54 | GC04M055078 | 23.3303  | <a href="https://www.genecards.org/cgi-bin/carddisp.pl?gene=KDR">https://www.genecards.org/cgi-bin/carddisp.pl?gene=KDR</a>         |
| MIR16-1 | MicroRNA 16-1                                   | RNA Gene       | 22 | GC13M050048 | 23.32462 | <a href="https://www.genecards.org/cgi-bin/carddisp.pl?gene=MIR16-1">https://www.genecards.org/cgi-bin/carddisp.pl?gene=MIR16-1</a> |
| BTNL2   | Butyrophilin Like 2                             | Protein Coding | 39 | GC06M032393 | 23.31023 | <a href="https://www.genecards.org/cgi-bin/carddisp.pl?gene=BTNL2">https://www.genecards.org/cgi-bin/carddisp.pl?gene=BTNL2</a>     |
| NR3C1   | Nuclear Receptor Subfamily 3 Group C Member 1   | Protein Coding | 51 | GC05M143277 | 23.27912 | <a href="https://www.genecards.org/cgi-bin/carddisp.pl?gene=NR3C1">https://www.genecards.org/cgi-bin/carddisp.pl?gene=NR3C1</a>     |
| TERC    | Telomerase RNA Component                        | RNA Gene       | 29 | GC03M169765 | 23.27304 | <a href="https://www.genecards.org/cgi-bin/carddisp.pl?gene=TERC">https://www.genecards.org/cgi-bin/carddisp.pl?gene=TERC</a>       |
| GH1     | Growth Hormone 1                                | Protein Coding | 44 | GC17M063917 | 23.26996 | <a href="https://www.genecards.org/cgi-bin/carddisp.pl?gene=GH1">https://www.genecards.org/cgi-bin/carddisp.pl?gene=GH1</a>         |
| SPG11   | SPG11 Vesicle Trafficking Associated, Spatacsin | Protein Coding | 40 | GC15M044562 | 23.25724 | <a href="https://www.genecards.org/cgi-bin/carddisp.pl?gene=SPG11">https://www.genecards.org/cgi-bin/carddisp.pl?gene=SPG11</a>     |
| MIR148A | MicroRNA 148a                                   | RNA Gene       | 19 | GC07M025993 | 23.2564  | <a href="https://www.genecards.org/cgi-bin/carddisp.pl?gene=MIR148A">https://www.genecards.org/cgi-bin/carddisp.pl?gene=MIR148A</a> |
| ATP13A2 | ATPase Cation Transporting 13A2                 | Protein Coding | 43 | GC01M016985 | 23.23734 | <a href="https://www.genecards.org/cgi-bin/carddisp.pl?gene=ATP13A2">https://www.genecards.org/cgi-bin/carddisp.pl?gene=ATP13A2</a> |
| PTCH1   | Patched 1                                       | Protein Coding | 51 | GC09M095442 | 23.2351  | <a href="https://www.genecards.org/cgi-bin/carddisp.pl?gene=PTCH1">https://www.genecards.org/cgi-bin/carddisp.pl?gene=PTCH1</a>     |
| HSPA5   | Heat Shock Protein Family A (Hsp70) Member 5    | Protein Coding | 48 | GC09M125234 | 23.22696 | <a href="https://www.genecards.org/cgi-bin/carddisp.pl?gene=HSPA5">https://www.genecards.org/cgi-bin/carddisp.pl?gene=HSPA5</a>     |
| TREX1   | Three Prime Repair Exonuclease 1                | Protein Coding | 43 | GC03P048466 | 23.19012 | <a href="https://www.genecards.org/cgi-bin/carddisp.pl?gene=TREX1">https://www.genecards.org/cgi-bin/carddisp.pl?gene=TREX1</a>     |
| DRD1    | Dopamine Receptor D1                            | Protein Coding | 45 | GC05M175440 | 23.13916 | <a href="https://www.genecards.org/cgi-bin/carddisp.pl?gene=DRD1">https://www.genecards.org/cgi-bin/carddisp.pl?gene=DRD1</a>       |
| CD44    | CD44 Molecule (Indian Blood Group)              | Protein Coding | 48 | GC11P035139 | 23.0711  | <a href="https://www.genecards.org/cgi-bin/carddisp.pl?gene=CD44">https://www.genecards.org/cgi-bin/carddisp.pl?gene=CD44</a>       |
| MT-TK   | Mitochondrially Encoded TRNA-Lys (AAA/G)        | RNA Gene       | 14 | GCMTP008297 | 23.04232 | <a href="https://www.genecards.org/cgi-bin/carddisp.pl?gene=MT-TK">https://www.genecards.org/cgi-bin/carddisp.pl?gene=MT-TK</a>     |
| ZEB2    | Zinc Finger E-Box Binding Homeobox 2            | Protein Coding | 48 | GC02M144384 | 23.03422 | <a href="https://www.genecards.org/cgi-bin/carddisp.pl?gene=ZEB2">https://www.genecards.org/cgi-bin/carddisp.pl?gene=ZEB2</a>       |
| PANK2   | Pantothenate Kinase 2                           | Protein Coding | 44 | GC20P003887 | 23.02143 | <a href="https://www.genecards.org/cgi-bin/carddisp.pl?gene=PANK2">https://www.genecards.org/cgi-bin/carddisp.pl?gene=PANK2</a>     |

|         |                                                         |                |    |             |          |                                                                                                                                     |
|---------|---------------------------------------------------------|----------------|----|-------------|----------|-------------------------------------------------------------------------------------------------------------------------------------|
| CACNA1A | Calcium Voltage-Gated Channel Subunit Alpha1 A          | Protein Coding | 47 | GC19M013206 | 22.98386 | <a href="https://www.genecards.org/cgi-bin/carddisp.pl?gene=CACNA1A">https://www.genecards.org/cgi-bin/carddisp.pl?gene=CACNA1A</a> |
| NEFH    | Neurofilament Heavy Chain                               | Protein Coding | 47 | GC22P029480 | 22.97906 | <a href="https://www.genecards.org/cgi-bin/carddisp.pl?gene=NEFH">https://www.genecards.org/cgi-bin/carddisp.pl?gene=NEFH</a>       |
| PLAT    | Plasminogen Activator, Tissue Type                      | Protein Coding | 50 | GC08M042174 | 22.97392 | <a href="https://www.genecards.org/cgi-bin/carddisp.pl?gene=PLAT">https://www.genecards.org/cgi-bin/carddisp.pl?gene=PLAT</a>       |
| PRKACA  | Protein Kinase CAMP-Activated Catalytic Subunit Alpha   | Protein Coding | 52 | GC19M014129 | 22.9361  | <a href="https://www.genecards.org/cgi-bin/carddisp.pl?gene=PRKACA">https://www.genecards.org/cgi-bin/carddisp.pl?gene=PRKACA</a>   |
| PRL     | Prolactin                                               | Protein Coding | 44 | GC06M022287 | 22.92311 | <a href="https://www.genecards.org/cgi-bin/carddisp.pl?gene=PRL">https://www.genecards.org/cgi-bin/carddisp.pl?gene=PRL</a>         |
| PAX2    | Paired Box 2                                            | Protein Coding | 47 | GC10P100735 | 22.90901 | <a href="https://www.genecards.org/cgi-bin/carddisp.pl?gene=PAX2">https://www.genecards.org/cgi-bin/carddisp.pl?gene=PAX2</a>       |
| CSF3    | Colony Stimulating Factor 3                             | Protein Coding | 40 | GC17P040015 | 22.90438 | <a href="https://www.genecards.org/cgi-bin/carddisp.pl?gene=CSF3">https://www.genecards.org/cgi-bin/carddisp.pl?gene=CSF3</a>       |
| MIR182  | MicroRNA 182                                            | RNA Gene       | 20 | GC07M129770 | 22.82952 | <a href="https://www.genecards.org/cgi-bin/carddisp.pl?gene=MIR182">https://www.genecards.org/cgi-bin/carddisp.pl?gene=MIR182</a>   |
| LRAT    | Lecithin Retinol Acyltransferase                        | Protein Coding | 45 | GC04P154626 | 22.82145 | <a href="https://www.genecards.org/cgi-bin/carddisp.pl?gene=LRAT">https://www.genecards.org/cgi-bin/carddisp.pl?gene=LRAT</a>       |
| NTRK2   | Neurotrophic Receptor Tyrosine Kinase 2                 | Protein Coding | 53 | GC09P084668 | 22.81317 | <a href="https://www.genecards.org/cgi-bin/carddisp.pl?gene=NTRK2">https://www.genecards.org/cgi-bin/carddisp.pl?gene=NTRK2</a>     |
| MAT1A   | Methionine Adenosyltransferase 1A                       | Protein Coding | 48 | GC10M080271 | 22.8094  | <a href="https://www.genecards.org/cgi-bin/carddisp.pl?gene=MAT1A">https://www.genecards.org/cgi-bin/carddisp.pl?gene=MAT1A</a>     |
| PON3    | Paraoxonase 3                                           | Protein Coding | 45 | GC07M095359 | 22.79139 | <a href="https://www.genecards.org/cgi-bin/carddisp.pl?gene=PON3">https://www.genecards.org/cgi-bin/carddisp.pl?gene=PON3</a>       |
| ARSB    | Arylsulfatase B                                         | Protein Coding | 44 | GC05M078777 | 22.73584 | <a href="https://www.genecards.org/cgi-bin/carddisp.pl?gene=ARSB">https://www.genecards.org/cgi-bin/carddisp.pl?gene=ARSB</a>       |
| RAD51   | RAD51 Recombinase                                       | Protein Coding | 53 | GC15P040694 | 22.67805 | <a href="https://www.genecards.org/cgi-bin/carddisp.pl?gene=RAD51">https://www.genecards.org/cgi-bin/carddisp.pl?gene=RAD51</a>     |
| HMBS    | Hydroxymethylbilane Synthase                            | Protein Coding | 45 | GC11P119084 | 22.67586 | <a href="https://www.genecards.org/cgi-bin/carddisp.pl?gene=HMBS">https://www.genecards.org/cgi-bin/carddisp.pl?gene=HMBS</a>       |
| ADAM10  | ADAM Metallopeptidase Domain 10                         | Protein Coding | 53 | GC15M058588 | 22.65889 | <a href="https://www.genecards.org/cgi-bin/carddisp.pl?gene=ADAM10">https://www.genecards.org/cgi-bin/carddisp.pl?gene=ADAM10</a>   |
| APOH    | Apolipoprotein H                                        | Protein Coding | 44 | GC17M066212 | 22.65094 | <a href="https://www.genecards.org/cgi-bin/carddisp.pl?gene=APOH">https://www.genecards.org/cgi-bin/carddisp.pl?gene=APOH</a>       |
| MYH6    | Myosin Heavy Chain 6                                    | Protein Coding | 47 | GC14M023380 | 22.64859 | <a href="https://www.genecards.org/cgi-bin/carddisp.pl?gene=MYH6">https://www.genecards.org/cgi-bin/carddisp.pl?gene=MYH6</a>       |
| MTR     | 5-Methyltetrahydrofolate-Homocysteine Methyltransferase | Protein Coding | 47 | GC01P236795 | 22.6412  | <a href="https://www.genecards.org/cgi-bin/carddisp.pl?gene=MTR">https://www.genecards.org/cgi-bin/carddisp.pl?gene=MTR</a>         |
| EDAR    | Ectodysplasin A Receptor                                | Protein Coding | 42 | GC02M108894 | 22.63719 | <a href="https://www.genecards.org/cgi-bin/carddisp.pl?gene=EDAR">https://www.genecards.org/cgi-bin/carddisp.pl?gene=EDAR</a>       |

|          |                                                                          |                |    |             |          |                                                                                                                                       |
|----------|--------------------------------------------------------------------------|----------------|----|-------------|----------|---------------------------------------------------------------------------------------------------------------------------------------|
| MIR130A  | MicroRNA 130a                                                            | RNA Gene       | 20 | GC11P057641 | 22.59392 | <a href="https://www.genecards.org/cgi-bin/carddisp.pl?gene=MIR130A">https://www.genecards.org/cgi-bin/carddisp.pl?gene=MIR130A</a>   |
| GP1BA    | Glycoprotein Ib Platelet Subunit Alpha                                   | Protein Coding | 46 | GC17P004932 | 22.59148 | <a href="https://www.genecards.org/cgi-bin/carddisp.pl?gene=GP1BA">https://www.genecards.org/cgi-bin/carddisp.pl?gene=GP1BA</a>       |
| MSR1     | Macrophage Scavenger Receptor 1                                          | Protein Coding | 47 | GC08M016107 | 22.57181 | <a href="https://www.genecards.org/cgi-bin/carddisp.pl?gene=MSR1">https://www.genecards.org/cgi-bin/carddisp.pl?gene=MSR1</a>         |
| DRD3     | Dopamine Receptor D3                                                     | Protein Coding | 45 | GC03M114128 | 22.5685  | <a href="https://www.genecards.org/cgi-bin/carddisp.pl?gene=DRD3">https://www.genecards.org/cgi-bin/carddisp.pl?gene=DRD3</a>         |
| PRKCQ    | Protein Kinase C Theta                                                   | Protein Coding | 50 | GC10M006393 | 22.53702 | <a href="https://www.genecards.org/cgi-bin/carddisp.pl?gene=PRKCQ">https://www.genecards.org/cgi-bin/carddisp.pl?gene=PRKCQ</a>       |
| ADA2     | Adenosine Deaminase 2                                                    | Protein Coding | 34 | GC22M017179 | 22.52611 | <a href="https://www.genecards.org/cgi-bin/carddisp.pl?gene=ADA2">https://www.genecards.org/cgi-bin/carddisp.pl?gene=ADA2</a>         |
| HLA-DPB1 | Major Histocompatibility Complex, Class II, DP Beta 1                    | Protein Coding | 44 | GC06P055237 | 22.52042 | <a href="https://www.genecards.org/cgi-bin/carddisp.pl?gene=HLA-DPB1">https://www.genecards.org/cgi-bin/carddisp.pl?gene=HLA-DPB1</a> |
| SGSH     | N-Sulfoglucosamine Sulfohydrolase                                        | Protein Coding | 45 | GC17M080206 | 22.50916 | <a href="https://www.genecards.org/cgi-bin/carddisp.pl?gene=SGSH">https://www.genecards.org/cgi-bin/carddisp.pl?gene=SGSH</a>         |
| PIK3C2A  | Phosphatidylinositol-4-Phosphate 3-Kinase Catalytic Subunit Type 2 Alpha | Protein Coding | 48 | GC11M017273 | 22.50707 | <a href="https://www.genecards.org/cgi-bin/carddisp.pl?gene=PIK3C2A">https://www.genecards.org/cgi-bin/carddisp.pl?gene=PIK3C2A</a>   |
| GCH1     | GTP Cyclohydrolase 1                                                     | Protein Coding | 48 | GC14M054842 | 22.45965 | <a href="https://www.genecards.org/cgi-bin/carddisp.pl?gene=GCH1">https://www.genecards.org/cgi-bin/carddisp.pl?gene=GCH1</a>         |
| KMT2A    | Lysine Methyltransferase 2A                                              | Protein Coding | 45 | GC11P118436 | 22.44756 | <a href="https://www.genecards.org/cgi-bin/carddisp.pl?gene=KMT2A">https://www.genecards.org/cgi-bin/carddisp.pl?gene=KMT2A</a>       |
| APOC2    | Apolipoprotein C2                                                        | Protein Coding | 45 | GC19P044945 | 22.44405 | <a href="https://www.genecards.org/cgi-bin/carddisp.pl?gene=APOC2">https://www.genecards.org/cgi-bin/carddisp.pl?gene=APOC2</a>       |
| LTA      | Lymphotoxin Alpha                                                        | Protein Coding | 43 | GC06P055200 | 22.43643 | <a href="https://www.genecards.org/cgi-bin/carddisp.pl?gene=LTA">https://www.genecards.org/cgi-bin/carddisp.pl?gene=LTA</a>           |
| UGT1A4   | UDP Glucuronosyltransferase Family 1 Member A4                           | Protein Coding | 42 | GC02P233718 | 22.43235 | <a href="https://www.genecards.org/cgi-bin/carddisp.pl?gene=UGT1A4">https://www.genecards.org/cgi-bin/carddisp.pl?gene=UGT1A4</a>     |
| LRP6     | LDL Receptor Related Protein 6                                           | Protein Coding | 49 | GC12M015714 | 22.42312 | <a href="https://www.genecards.org/cgi-bin/carddisp.pl?gene=LRP6">https://www.genecards.org/cgi-bin/carddisp.pl?gene=LRP6</a>         |
| HTRA2    | HtrA Serine Peptidase 2                                                  | Protein Coding | 47 | GC02P074529 | 22.38318 | <a href="https://www.genecards.org/cgi-bin/carddisp.pl?gene=HTRA2">https://www.genecards.org/cgi-bin/carddisp.pl?gene=HTRA2</a>       |
| MPL      | MPL Proto-Oncogene, Thrombopoietin Receptor                              | Protein Coding | 48 | GC01P043337 | 22.36273 | <a href="https://www.genecards.org/cgi-bin/carddisp.pl?gene=MPL">https://www.genecards.org/cgi-bin/carddisp.pl?gene=MPL</a>           |
| RARRES2  | Retinoic Acid Receptor Responder 2                                       | Protein Coding | 40 | GC07M150333 | 22.33598 | <a href="https://www.genecards.org/cgi-bin/carddisp.pl?gene=RARRES2">https://www.genecards.org/cgi-bin/carddisp.pl?gene=RARRES2</a>   |



|         |                                                           |                |    |             |          |                                                                                                                                     |
|---------|-----------------------------------------------------------|----------------|----|-------------|----------|-------------------------------------------------------------------------------------------------------------------------------------|
| ALK     | ALK Receptor Tyrosine Kinase                              | Protein Coding | 52 | GC02M029190 | 22.33488 | <a href="https://www.genecards.org/cgi-bin/carddisp.pl?gene=ALK">https://www.genecards.org/cgi-bin/carddisp.pl?gene=ALK</a>         |
| ACHE    | Acetylcholinesterase (Cartwright Blood Group)             | Protein Coding | 47 | GC07M100889 | 22.33347 | <a href="https://www.genecards.org/cgi-bin/carddisp.pl?gene=ACHE">https://www.genecards.org/cgi-bin/carddisp.pl?gene=ACHE</a>       |
| GIGYF2  | GRB10 Interacting GYF Protein 2                           | Protein Coding | 40 | GC02P232698 | 22.31904 | <a href="https://www.genecards.org/cgi-bin/carddisp.pl?gene=GIGYF2">https://www.genecards.org/cgi-bin/carddisp.pl?gene=GIGYF2</a>   |
| APOL1   | Apolipoprotein L1                                         | Protein Coding | 43 | GC22P036253 | 22.31812 | <a href="https://www.genecards.org/cgi-bin/carddisp.pl?gene=APOL1">https://www.genecards.org/cgi-bin/carddisp.pl?gene=APOL1</a>     |
| SPARC   | Secreted Protein Acidic And Cysteine Rich                 | Protein Coding | 51 | GC05M151661 | 22.31486 | <a href="https://www.genecards.org/cgi-bin/carddisp.pl?gene=SPARC">https://www.genecards.org/cgi-bin/carddisp.pl?gene=SPARC</a>     |
| DNAJB2  | DnaJ Heat Shock Protein Family (Hsp40) Member B2          | Protein Coding | 44 | GC02P219279 | 22.30968 | <a href="https://www.genecards.org/cgi-bin/carddisp.pl?gene=DNAJB2">https://www.genecards.org/cgi-bin/carddisp.pl?gene=DNAJB2</a>   |
| TET2    | Tet Methylcytosine Dioxygenase 2                          | Protein Coding | 45 | GC04P105145 | 22.30623 | <a href="https://www.genecards.org/cgi-bin/carddisp.pl?gene=TET2">https://www.genecards.org/cgi-bin/carddisp.pl?gene=TET2</a>       |
| PLG     | Plasminogen                                               | Protein Coding | 49 | GC06P160702 | 22.30028 | <a href="https://www.genecards.org/cgi-bin/carddisp.pl?gene=PLG">https://www.genecards.org/cgi-bin/carddisp.pl?gene=PLG</a>         |
| FLT1    | Fms Related Receptor Tyrosine Kinase 1                    | Protein Coding | 51 | GC13M028300 | 22.28722 | <a href="https://www.genecards.org/cgi-bin/carddisp.pl?gene=FLT1">https://www.genecards.org/cgi-bin/carddisp.pl?gene=FLT1</a>       |
| GABRG2  | Gamma-Aminobutyric Acid Type A Receptor Subunit Gamma2    | Protein Coding | 48 | GC05P162000 | 22.27747 | <a href="https://www.genecards.org/cgi-bin/carddisp.pl?gene=GABRG2">https://www.genecards.org/cgi-bin/carddisp.pl?gene=GABRG2</a>   |
| GLUD1   | Glutamate Dehydrogenase 1                                 | Protein Coding | 50 | GC10M087050 | 22.2685  | <a href="https://www.genecards.org/cgi-bin/carddisp.pl?gene=GLUD1">https://www.genecards.org/cgi-bin/carddisp.pl?gene=GLUD1</a>     |
| CRAT    | Carnitine O-Acetyltransferase                             | Protein Coding | 45 | GC09M129094 | 22.26841 | <a href="https://www.genecards.org/cgi-bin/carddisp.pl?gene=CRAT">https://www.genecards.org/cgi-bin/carddisp.pl?gene=CRAT</a>       |
| EIF2AK4 | Eukaryotic Translation Initiation Factor 2 Alpha Kinase 4 | Protein Coding | 45 | GC15P039934 | 22.25947 | <a href="https://www.genecards.org/cgi-bin/carddisp.pl?gene=EIF2AK4">https://www.genecards.org/cgi-bin/carddisp.pl?gene=EIF2AK4</a> |
| MIF     | Macrophage Migration Inhibitory Factor                    | Protein Coding | 50 | GC22P023894 | 22.24175 | <a href="https://www.genecards.org/cgi-bin/carddisp.pl?gene=MIF">https://www.genecards.org/cgi-bin/carddisp.pl?gene=MIF</a>         |
| PRKAA2  | Protein Kinase AMP-Activated Catalytic Subunit Alpha 2    | Protein Coding | 51 | GC01P056645 | 22.22001 | <a href="https://www.genecards.org/cgi-bin/carddisp.pl?gene=PRKAA2">https://www.genecards.org/cgi-bin/carddisp.pl?gene=PRKAA2</a>   |

|         |                                                 |                |    |             |          |                                                                                                                                     |
|---------|-------------------------------------------------|----------------|----|-------------|----------|-------------------------------------------------------------------------------------------------------------------------------------|
| PCK1    | Phosphoenolpyruvate Carboxykinase 1             | Protein Coding | 49 | GC20P057561 | 22.20303 | <a href="https://www.genecards.org/cgi-bin/carddisp.pl?gene=PCK1">https://www.genecards.org/cgi-bin/carddisp.pl?gene=PCK1</a>       |
| NQO1    | NAD(P)H Quinone Dehydrogenase 1                 | Protein Coding | 50 | GC16M069706 | 22.19145 | <a href="https://www.genecards.org/cgi-bin/carddisp.pl?gene=NQO1">https://www.genecards.org/cgi-bin/carddisp.pl?gene=NQO1</a>       |
| ECE1    | Endothelin Converting Enzyme 1                  | Protein Coding | 48 | GC01M021217 | 22.18433 | <a href="https://www.genecards.org/cgi-bin/carddisp.pl?gene=ECE1">https://www.genecards.org/cgi-bin/carddisp.pl?gene=ECE1</a>       |
| NDUFS2  | NADH:Ubiquinone Oxidoreductase Core Subunit S2  | Protein Coding | 45 | GC01P161197 | 22.11997 | <a href="https://www.genecards.org/cgi-bin/carddisp.pl?gene=NDUFS2">https://www.genecards.org/cgi-bin/carddisp.pl?gene=NDUFS2</a>   |
| GHR     | Growth Hormone Receptor                         | Protein Coding | 47 | GC05P042429 | 22.09077 | <a href="https://www.genecards.org/cgi-bin/carddisp.pl?gene=GHR">https://www.genecards.org/cgi-bin/carddisp.pl?gene=GHR</a>         |
| SP1     | Sp1 Transcription Factor                        | Protein Coding | 45 | GC12P053380 | 22.08446 | <a href="https://www.genecards.org/cgi-bin/carddisp.pl?gene=SP1">https://www.genecards.org/cgi-bin/carddisp.pl?gene=SP1</a>         |
| AWAT1   | Acyl-CoA Wax Alcohol Acyltransferase 1          | Protein Coding | 29 | GC0XP070234 | 22.06117 | <a href="https://www.genecards.org/cgi-bin/carddisp.pl?gene=AWAT1">https://www.genecards.org/cgi-bin/carddisp.pl?gene=AWAT1</a>     |
| NR1I3   | Nuclear Receptor Subfamily 1 Group I Member 3   | Protein Coding | 45 | GC01M161229 | 22.04448 | <a href="https://www.genecards.org/cgi-bin/carddisp.pl?gene=NR1I3">https://www.genecards.org/cgi-bin/carddisp.pl?gene=NR1I3</a>     |
| BICC1   | BicC Family RNA Binding Protein 1               | Protein Coding | 37 | GC10P058513 | 22.02353 | <a href="https://www.genecards.org/cgi-bin/carddisp.pl?gene=BICC1">https://www.genecards.org/cgi-bin/carddisp.pl?gene=BICC1</a>     |
| TCF7L2  | Transcription Factor 7 Like 2                   | Protein Coding | 46 | GC10P112950 | 22.01611 | <a href="https://www.genecards.org/cgi-bin/carddisp.pl?gene=TCF7L2">https://www.genecards.org/cgi-bin/carddisp.pl?gene=TCF7L2</a>   |
| FADD    | Fas Associated Via Death Domain                 | Protein Coding | 48 | GC11P070203 | 21.99869 | <a href="https://www.genecards.org/cgi-bin/carddisp.pl?gene=FADD">https://www.genecards.org/cgi-bin/carddisp.pl?gene=FADD</a>       |
| NOTCH3  | Notch Receptor 3                                | Protein Coding | 50 | GC19M015159 | 21.98598 | <a href="https://www.genecards.org/cgi-bin/carddisp.pl?gene=NOTCH3">https://www.genecards.org/cgi-bin/carddisp.pl?gene=NOTCH3</a>   |
| HLA-C   | Major Histocompatibility Complex, Class I, C    | Protein Coding | 45 | GC06M046831 | 21.98008 | <a href="https://www.genecards.org/cgi-bin/carddisp.pl?gene=HLA-C">https://www.genecards.org/cgi-bin/carddisp.pl?gene=HLA-C</a>     |
| UGT1A10 | UDP Glucuronosyltransferase Family 1 Member A10 | Protein Coding | 41 | GC02P233636 | 21.94478 | <a href="https://www.genecards.org/cgi-bin/carddisp.pl?gene=UGT1A10">https://www.genecards.org/cgi-bin/carddisp.pl?gene=UGT1A10</a> |
| AFG3L2  | AFG3 Like Matrix AAA Peptidase Subunit 2        | Protein Coding | 45 | GC18M012328 | 21.93707 | <a href="https://www.genecards.org/cgi-bin/carddisp.pl?gene=AFG3L2">https://www.genecards.org/cgi-bin/carddisp.pl?gene=AFG3L2</a>   |
| SCARB1  | Scavenger Receptor Class B Member 1             | Protein Coding | 46 | GC12M124776 | 21.90098 | <a href="https://www.genecards.org/cgi-bin/carddisp.pl?gene=SCARB1">https://www.genecards.org/cgi-bin/carddisp.pl?gene=SCARB1</a>   |

|        |                                                                  |                |    |             |          |                                                                                                                                   |
|--------|------------------------------------------------------------------|----------------|----|-------------|----------|-----------------------------------------------------------------------------------------------------------------------------------|
| CHIT1  | Chitinase 1                                                      | Protein Coding | 44 | GC01M203181 | 21.90074 | <a href="https://www.genecards.org/cgi-bin/carddisp.pl?gene=CHIT1">https://www.genecards.org/cgi-bin/carddisp.pl?gene=CHIT1</a>   |
| PKD2L1 | Polycystin 2 Like 1, Transient Receptor Potential Cation Channel | Protein Coding | 42 | GC10M100288 | 21.89248 | <a href="https://www.genecards.org/cgi-bin/carddisp.pl?gene=PKD2L1">https://www.genecards.org/cgi-bin/carddisp.pl?gene=PKD2L1</a> |
| GUCY2D | Guanylate Cyclase 2D, Retinal                                    | Protein Coding | 44 | GC17P008002 | 21.86941 | <a href="https://www.genecards.org/cgi-bin/carddisp.pl?gene=GUCY2D">https://www.genecards.org/cgi-bin/carddisp.pl?gene=GUCY2D</a> |
| APOA2  | Apolipoprotein A2                                                | Protein Coding | 44 | GC01M161222 | 21.85445 | <a href="https://www.genecards.org/cgi-bin/carddisp.pl?gene=APOA2">https://www.genecards.org/cgi-bin/carddisp.pl?gene=APOA2</a>   |
| SBF1   | SET Binding Factor 1                                             | Protein Coding | 42 | GC22M050445 | 21.82764 | <a href="https://www.genecards.org/cgi-bin/carddisp.pl?gene=SBF1">https://www.genecards.org/cgi-bin/carddisp.pl?gene=SBF1</a>     |
| IFNB1  | Interferon Beta 1                                                | Protein Coding | 42 | GC09M021077 | 21.81886 | <a href="https://www.genecards.org/cgi-bin/carddisp.pl?gene=IFNB1">https://www.genecards.org/cgi-bin/carddisp.pl?gene=IFNB1</a>   |
| CASP1  | Caspase 1                                                        | Protein Coding | 51 | GC11M105025 | 21.81465 | <a href="https://www.genecards.org/cgi-bin/carddisp.pl?gene=CASP1">https://www.genecards.org/cgi-bin/carddisp.pl?gene=CASP1</a>   |
| RPE65  | Retinoid Isomerohydrolase RPE65                                  | Protein Coding | 45 | GC01M068428 | 21.80959 | <a href="https://www.genecards.org/cgi-bin/carddisp.pl?gene=RPE65">https://www.genecards.org/cgi-bin/carddisp.pl?gene=RPE65</a>   |
| LRP1   | LDL Receptor Related Protein 1                                   | Protein Coding | 48 | GC12P057128 | 21.8083  | <a href="https://www.genecards.org/cgi-bin/carddisp.pl?gene=LRP1">https://www.genecards.org/cgi-bin/carddisp.pl?gene=LRP1</a>     |
| HBA1   | Hemoglobin Subunit Alpha 1                                       | Protein Coding | 43 | GC16P005490 | 21.80419 | <a href="https://www.genecards.org/cgi-bin/carddisp.pl?gene=HBA1">https://www.genecards.org/cgi-bin/carddisp.pl?gene=HBA1</a>     |
| PPIG   | Peptidylprolyl Isomerase G                                       | Protein Coding | 43 | GC02P169584 | 21.77139 | <a href="https://www.genecards.org/cgi-bin/carddisp.pl?gene=PPIG">https://www.genecards.org/cgi-bin/carddisp.pl?gene=PPIG</a>     |
| ALAD   | Aminolevulinat e Dehydratase                                     | Protein Coding | 47 | GC09M113386 | 21.76044 | <a href="https://www.genecards.org/cgi-bin/carddisp.pl?gene=ALAD">https://www.genecards.org/cgi-bin/carddisp.pl?gene=ALAD</a>     |
| CASP9  | Caspase 9                                                        | Protein Coding | 48 | GC01M015491 | 21.74611 | <a href="https://www.genecards.org/cgi-bin/carddisp.pl?gene=CASP9">https://www.genecards.org/cgi-bin/carddisp.pl?gene=CASP9</a>   |
| NDUFS7 | NADH:Ubiquin one Oxidoreductase Core Subunit S7                  | Protein Coding | 47 | GC19P001635 | 21.72116 | <a href="https://www.genecards.org/cgi-bin/carddisp.pl?gene=NDUFS7">https://www.genecards.org/cgi-bin/carddisp.pl?gene=NDUFS7</a> |
| CDK4   | Cyclin Dependent Kinase 4                                        | Protein Coding | 54 | GC12M057743 | 21.71355 | <a href="https://www.genecards.org/cgi-bin/carddisp.pl?gene=CDK4">https://www.genecards.org/cgi-bin/carddisp.pl?gene=CDK4</a>     |
| TCTN2  | Tectonic Family Member 2                                         | Protein Coding | 39 | GC12P123671 | 21.71339 | <a href="https://www.genecards.org/cgi-bin/carddisp.pl?gene=TCTN2">https://www.genecards.org/cgi-bin/carddisp.pl?gene=TCTN2</a>   |
| CSF2   | Colony Stimulating Factor 2                                      | Protein Coding | 44 | GC05P132073 | 21.71247 | <a href="https://www.genecards.org/cgi-bin/carddisp.pl?gene=CSF2">https://www.genecards.org/cgi-bin/carddisp.pl?gene=CSF2</a>     |
| SMAD6  | SMAD Family Member 6                                             | Protein Coding | 47 | GC15P066702 | 21.67286 | <a href="https://www.genecards.org/cgi-bin/carddisp.pl?gene=SMAD6">https://www.genecards.org/cgi-bin/carddisp.pl?gene=SMAD6</a>   |
| CLCN7  | Chloride Voltage-Gated Channel 7                                 | Protein Coding | 46 | GC16M001444 | 21.67075 | <a href="https://www.genecards.org/cgi-bin/carddisp.pl?gene=CLCN7">https://www.genecards.org/cgi-bin/carddisp.pl?gene=CLCN7</a>   |
| AGPS   | Alkylglycerone Phosphate Synthase                                | Protein Coding | 44 | GC02P177392 | 21.66693 | <a href="https://www.genecards.org/cgi-bin/carddisp.pl?gene=AGPS">https://www.genecards.org/cgi-bin/carddisp.pl?gene=AGPS</a>     |

|        |                                                  |                |    |             |          |                                                                                                                                   |
|--------|--------------------------------------------------|----------------|----|-------------|----------|-----------------------------------------------------------------------------------------------------------------------------------|
| SP140  | SP140 Nuclear Body Protein                       | Protein Coding | 38 | GC02P230203 | 21.65835 | <a href="https://www.genecards.org/cgi-bin/carddisp.pl?gene=SP140">https://www.genecards.org/cgi-bin/carddisp.pl?gene=SP140</a>   |
| IDH2   | Isocitrate Dehydrogenase (NADP(+)) 2             | Protein Coding | 52 | GC15M090083 | 21.64223 | <a href="https://www.genecards.org/cgi-bin/carddisp.pl?gene=IDH2">https://www.genecards.org/cgi-bin/carddisp.pl?gene=IDH2</a>     |
| CTNS   | Cystinosis, Lysosomal Cystine Transporter        | Protein Coding | 45 | GC17P003636 | 21.61856 | <a href="https://www.genecards.org/cgi-bin/carddisp.pl?gene=CTNS">https://www.genecards.org/cgi-bin/carddisp.pl?gene=CTNS</a>     |
| AKR1B1 | Aldo-Keto Reductase Family 1 Member B            | Protein Coding | 48 | GC07M134442 | 21.61324 | <a href="https://www.genecards.org/cgi-bin/carddisp.pl?gene=AKR1B1">https://www.genecards.org/cgi-bin/carddisp.pl?gene=AKR1B1</a> |
| COG2   | Component Of Oligomeric Golgi Complex 2          | Protein Coding | 41 | GC01P230642 | 21.60097 | <a href="https://www.genecards.org/cgi-bin/carddisp.pl?gene=COG2">https://www.genecards.org/cgi-bin/carddisp.pl?gene=COG2</a>     |
| RIPK1  | Receptor Interacting Serine/Threonine Kinase 1   | Protein Coding | 50 | GC06P003073 | 21.59178 | <a href="https://www.genecards.org/cgi-bin/carddisp.pl?gene=RIPK1">https://www.genecards.org/cgi-bin/carddisp.pl?gene=RIPK1</a>   |
| FLG    | Filaggrin                                        | Protein Coding | 40 | GC01M152274 | 21.5907  | <a href="https://www.genecards.org/cgi-bin/carddisp.pl?gene=FLG">https://www.genecards.org/cgi-bin/carddisp.pl?gene=FLG</a>       |
| COL1A2 | Collagen Type I Alpha 2 Chain                    | Protein Coding | 48 | GC07P094394 | 21.56881 | <a href="https://www.genecards.org/cgi-bin/carddisp.pl?gene=COL1A2">https://www.genecards.org/cgi-bin/carddisp.pl?gene=COL1A2</a> |
| MIR183 | MicroRNA 183                                     | RNA Gene       | 18 | GC07M129798 | 21.55194 | <a href="https://www.genecards.org/cgi-bin/carddisp.pl?gene=MIR183">https://www.genecards.org/cgi-bin/carddisp.pl?gene=MIR183</a> |
| CRB1   | Crumbs Cell Polarity Complex Component 1         | Protein Coding | 44 | GC01P197170 | 21.55091 | <a href="https://www.genecards.org/cgi-bin/carddisp.pl?gene=CRB1">https://www.genecards.org/cgi-bin/carddisp.pl?gene=CRB1</a>     |
| NR5A2  | Nuclear Receptor Subfamily 5 Group A Member 2    | Protein Coding | 47 | GC01P199996 | 21.54375 | <a href="https://www.genecards.org/cgi-bin/carddisp.pl?gene=NR5A2">https://www.genecards.org/cgi-bin/carddisp.pl?gene=NR5A2</a>   |
| MIR144 | MicroRNA 144                                     | RNA Gene       | 17 | GC17M031086 | 21.51498 | <a href="https://www.genecards.org/cgi-bin/carddisp.pl?gene=MIR144">https://www.genecards.org/cgi-bin/carddisp.pl?gene=MIR144</a> |
| MMUT   | Methylmalonyl-CoA Mutase                         | Protein Coding | 36 | GC06M049430 | 21.50561 | <a href="https://www.genecards.org/cgi-bin/carddisp.pl?gene=MMUT">https://www.genecards.org/cgi-bin/carddisp.pl?gene=MMUT</a>     |
| UGT1A3 | UDP Glucuronosyltransferase Family 1 Member A3   | Protein Coding | 39 | GC02P233729 | 21.49641 | <a href="https://www.genecards.org/cgi-bin/carddisp.pl?gene=UGT1A3">https://www.genecards.org/cgi-bin/carddisp.pl?gene=UGT1A3</a> |
| CD8A   | CD8a Molecule                                    | Protein Coding | 47 | GC02M086784 | 21.49401 | <a href="https://www.genecards.org/cgi-bin/carddisp.pl?gene=CD8A">https://www.genecards.org/cgi-bin/carddisp.pl?gene=CD8A</a>     |
| MIR205 | MicroRNA 205                                     | RNA Gene       | 20 | GC01P209493 | 21.49146 | <a href="https://www.genecards.org/cgi-bin/carddisp.pl?gene=MIR205">https://www.genecards.org/cgi-bin/carddisp.pl?gene=MIR205</a> |
| PPARD  | Peroxisome Proliferator Activated Receptor Delta | Protein Coding | 48 | GC06P055324 | 21.48622 | <a href="https://www.genecards.org/cgi-bin/carddisp.pl?gene=PPARD">https://www.genecards.org/cgi-bin/carddisp.pl?gene=PPARD</a>   |
| CPOX   | Coproporphyrinogen Oxidase                       | Protein Coding | 44 | GC03M098576 | 21.45315 | <a href="https://www.genecards.org/cgi-bin/carddisp.pl?gene=CPOX">https://www.genecards.org/cgi-bin/carddisp.pl?gene=CPOX</a>     |

|         |                                                                        |                |    |             |          |                                                                                                                                     |
|---------|------------------------------------------------------------------------|----------------|----|-------------|----------|-------------------------------------------------------------------------------------------------------------------------------------|
| ARID1B  | AT-Rich Interaction Domain 1B                                          | Protein Coding | 45 | GC06P156777 | 21.44675 | <a href="https://www.genecards.org/cgi-bin/carddisp.pl?gene=ARID1B">https://www.genecards.org/cgi-bin/carddisp.pl?gene=ARID1B</a>   |
| CYP2C8  | Cytochrome P450 Family 2 Subfamily C Member 8                          | Protein Coding | 49 | GC10M095038 | 21.43716 | <a href="https://www.genecards.org/cgi-bin/carddisp.pl?gene=CYP2C8">https://www.genecards.org/cgi-bin/carddisp.pl?gene=CYP2C8</a>   |
| EDNRA   | Endothelin Receptor Type A                                             | Protein Coding | 50 | GC04P147480 | 21.39463 | <a href="https://www.genecards.org/cgi-bin/carddisp.pl?gene=EDNRA">https://www.genecards.org/cgi-bin/carddisp.pl?gene=EDNRA</a>     |
| SBDS    | SBDS Ribosome Maturation Factor                                        | Protein Coding | 43 | GC07M066987 | 21.38954 | <a href="https://www.genecards.org/cgi-bin/carddisp.pl?gene=SBDS">https://www.genecards.org/cgi-bin/carddisp.pl?gene=SBDS</a>       |
| NDUFAF6 | NADH:Ubiquinone Oxidoreductase Complex Assembly Factor 6               | Protein Coding | 35 | GC08P094895 | 21.36459 | <a href="https://www.genecards.org/cgi-bin/carddisp.pl?gene=NDUFAF6">https://www.genecards.org/cgi-bin/carddisp.pl?gene=NDUFAF6</a> |
| PIK3CG  | Phosphatidylinositol-4,5-Bisphosphate 3-Kinase Catalytic Subunit Gamma | Protein Coding | 49 | GC07P106865 | 21.32251 | <a href="https://www.genecards.org/cgi-bin/carddisp.pl?gene=PIK3CG">https://www.genecards.org/cgi-bin/carddisp.pl?gene=PIK3CG</a>   |
| MIR33A  | MicroRNA 33a                                                           | RNA Gene       | 19 | GC22P041900 | 21.31961 | <a href="https://www.genecards.org/cgi-bin/carddisp.pl?gene=MIR33A">https://www.genecards.org/cgi-bin/carddisp.pl?gene=MIR33A</a>   |
| MST1    | Macrophage Stimulating 1                                               | Protein Coding | 46 | GC03M049683 | 21.31592 | <a href="https://www.genecards.org/cgi-bin/carddisp.pl?gene=MST1">https://www.genecards.org/cgi-bin/carddisp.pl?gene=MST1</a>       |
| CPS1    | Carbamoyl-Phosphate Synthase 1                                         | Protein Coding | 46 | GC02P210477 | 21.30848 | <a href="https://www.genecards.org/cgi-bin/carddisp.pl?gene=CPS1">https://www.genecards.org/cgi-bin/carddisp.pl?gene=CPS1</a>       |
| TTN-AS1 | TTN Antisense RNA 1                                                    | RNA Gene       | 16 | GC02P178521 | 21.30586 | <a href="https://www.genecards.org/cgi-bin/carddisp.pl?gene=TTN-AS1">https://www.genecards.org/cgi-bin/carddisp.pl?gene=TTN-AS1</a> |
| SYP     | Synaptophysin                                                          | Protein Coding | 44 | GC0XM049187 | 21.29917 | <a href="https://www.genecards.org/cgi-bin/carddisp.pl?gene=SYP">https://www.genecards.org/cgi-bin/carddisp.pl?gene=SYP</a>         |
| PC      | Pyruvate Carboxylase                                                   | Protein Coding | 48 | GC11M066848 | 21.28424 | <a href="https://www.genecards.org/cgi-bin/carddisp.pl?gene=PC">https://www.genecards.org/cgi-bin/carddisp.pl?gene=PC</a>           |
| NDUFV2  | NADH:Ubiquinone Oxidoreductase Core Subunit V2                         | Protein Coding | 45 | GC18P009092 | 21.2616  | <a href="https://www.genecards.org/cgi-bin/carddisp.pl?gene=NDUFV2">https://www.genecards.org/cgi-bin/carddisp.pl?gene=NDUFV2</a>   |
| CD46    | CD46 Molecule                                                          | Protein Coding | 47 | GC01P207752 | 21.24768 | <a href="https://www.genecards.org/cgi-bin/carddisp.pl?gene=CD46">https://www.genecards.org/cgi-bin/carddisp.pl?gene=CD46</a>       |
| KITLG   | KIT Ligand                                                             | Protein Coding | 45 | GC12M088492 | 21.23805 | <a href="https://www.genecards.org/cgi-bin/carddisp.pl?gene=KITLG">https://www.genecards.org/cgi-bin/carddisp.pl?gene=KITLG</a>     |
| ABCC6   | ATP Binding Cassette Subfamily C Member 6                              | Protein Coding | 47 | GC16M016148 | 21.2084  | <a href="https://www.genecards.org/cgi-bin/carddisp.pl?gene=ABCC6">https://www.genecards.org/cgi-bin/carddisp.pl?gene=ABCC6</a>     |
| CDKN2B  | Cyclin Dependent Kinase Inhibitor 2B                                   | Protein Coding | 48 | GC09M022002 | 21.20182 | <a href="https://www.genecards.org/cgi-bin/carddisp.pl?gene=CDKN2B">https://www.genecards.org/cgi-bin/carddisp.pl?gene=CDKN2B</a>   |

|         |                                                           |                |    |             |          |                                                                                                                                     |
|---------|-----------------------------------------------------------|----------------|----|-------------|----------|-------------------------------------------------------------------------------------------------------------------------------------|
| GYG1    | Glycogenin 1                                              | Protein Coding | 47 | GC03P148991 | 21.19632 | <a href="https://www.genecards.org/cgi-bin/carddisp.pl?gene=GYG1">https://www.genecards.org/cgi-bin/carddisp.pl?gene=GYG1</a>       |
| COX6A1  | Cytochrome C Oxidase Subunit 6A1                          | Protein Coding | 45 | GC12P120439 | 21.15471 | <a href="https://www.genecards.org/cgi-bin/carddisp.pl?gene=COX6A1">https://www.genecards.org/cgi-bin/carddisp.pl?gene=COX6A1</a>   |
| CACNA1C | Calcium Voltage-Gated Channel Subunit Alpha1 C            | Protein Coding | 50 | GC12P001970 | 21.14977 | <a href="https://www.genecards.org/cgi-bin/carddisp.pl?gene=CACNA1C">https://www.genecards.org/cgi-bin/carddisp.pl?gene=CACNA1C</a> |
| ERN1    | Endoplasmic Reticulum To Nucleus Signaling 1              | Protein Coding | 46 | GC17M064039 | 21.14885 | <a href="https://www.genecards.org/cgi-bin/carddisp.pl?gene=ERN1">https://www.genecards.org/cgi-bin/carddisp.pl?gene=ERN1</a>       |
| LOX     | Lysyl Oxidase                                             | Protein Coding | 45 | GC05M122063 | 21.14855 | <a href="https://www.genecards.org/cgi-bin/carddisp.pl?gene=LOX">https://www.genecards.org/cgi-bin/carddisp.pl?gene=LOX</a>         |
| IFNGR1  | Interferon Gamma Receptor 1                               | Protein Coding | 50 | GC06M137197 | 21.12041 | <a href="https://www.genecards.org/cgi-bin/carddisp.pl?gene=IFNGR1">https://www.genecards.org/cgi-bin/carddisp.pl?gene=IFNGR1</a>   |
| GALNS   | Galactosamine (N-Acetyl)-6-Sulfatase                      | Protein Coding | 45 | GC16M088813 | 21.07434 | <a href="https://www.genecards.org/cgi-bin/carddisp.pl?gene=GALNS">https://www.genecards.org/cgi-bin/carddisp.pl?gene=GALNS</a>     |
| MIR451A | MicroRNA 451a                                             | RNA Gene       | 18 | GC17M028861 | 21.06853 | <a href="https://www.genecards.org/cgi-bin/carddisp.pl?gene=MIR451A">https://www.genecards.org/cgi-bin/carddisp.pl?gene=MIR451A</a> |
| GLE1    | GLE1 RNA Export Mediator                                  | Protein Coding | 41 | GC09P128504 | 21.05136 | <a href="https://www.genecards.org/cgi-bin/carddisp.pl?gene=GLE1">https://www.genecards.org/cgi-bin/carddisp.pl?gene=GLE1</a>       |
| EIF2AK3 | Eukaryotic Translation Initiation Factor 2 Alpha Kinase 3 | Protein Coding | 50 | GC02M088556 | 21.03918 | <a href="https://www.genecards.org/cgi-bin/carddisp.pl?gene=EIF2AK3">https://www.genecards.org/cgi-bin/carddisp.pl?gene=EIF2AK3</a> |
| PLA2G4A | Phospholipase A2 Group IVA                                | Protein Coding | 50 | GC01P186798 | 21.03371 | <a href="https://www.genecards.org/cgi-bin/carddisp.pl?gene=PLA2G4A">https://www.genecards.org/cgi-bin/carddisp.pl?gene=PLA2G4A</a> |
| GSR     | Glutathione-Disulfide Reductase                           | Protein Coding | 50 | GC08M030678 | 21.03178 | <a href="https://www.genecards.org/cgi-bin/carddisp.pl?gene=GSR">https://www.genecards.org/cgi-bin/carddisp.pl?gene=GSR</a>         |
| CRYAA   | Crystallin Alpha A                                        | Protein Coding | 45 | GC21P043169 | 20.98034 | <a href="https://www.genecards.org/cgi-bin/carddisp.pl?gene=CRYAA">https://www.genecards.org/cgi-bin/carddisp.pl?gene=CRYAA</a>     |
| CYP3A5  | Cytochrome P450 Family 3 Subfamily A Member 5             | Protein Coding | 48 | GC07M099648 | 20.96791 | <a href="https://www.genecards.org/cgi-bin/carddisp.pl?gene=CYP3A5">https://www.genecards.org/cgi-bin/carddisp.pl?gene=CYP3A5</a>   |
| B9D1    | B9 Domain Containing 1                                    | Protein Coding | 37 | GC17M019334 | 20.95131 | <a href="https://www.genecards.org/cgi-bin/carddisp.pl?gene=B9D1">https://www.genecards.org/cgi-bin/carddisp.pl?gene=B9D1</a>       |
| PLA2G7  | Phospholipase A2 Group VII                                | Protein Coding | 50 | GC06M047382 | 20.93696 | <a href="https://www.genecards.org/cgi-bin/carddisp.pl?gene=PLA2G7">https://www.genecards.org/cgi-bin/carddisp.pl?gene=PLA2G7</a>   |
| NBN     | Nibrin                                                    | Protein Coding | 48 | GC08M089933 | 20.93391 | <a href="https://www.genecards.org/cgi-bin/carddisp.pl?gene=NBN">https://www.genecards.org/cgi-bin/carddisp.pl?gene=NBN</a>         |
| MIR30E  | MicroRNA 30e                                              | RNA Gene       | 21 | GC01P040754 | 20.91616 | <a href="https://www.genecards.org/cgi-bin/carddisp.pl?gene=MIR30E">https://www.genecards.org/cgi-bin/carddisp.pl?gene=MIR30E</a>   |
| TNNI3   | Troponin I3, Cardiac Type                                 | Protein Coding | 50 | GC19M055151 | 20.88725 | <a href="https://www.genecards.org/cgi-bin/carddisp.pl?gene=TNNI3">https://www.genecards.org/cgi-bin/carddisp.pl?gene=TNNI3</a>     |
| IL2RB   | Interleukin 2 Receptor Subunit Beta                       | Protein Coding | 49 | GC22M037125 | 20.87809 | <a href="https://www.genecards.org/cgi-bin/carddisp.pl?gene=IL2RB">https://www.genecards.org/cgi-bin/carddisp.pl?gene=IL2RB</a>     |
| CDH2    | Cadherin 2                                                | Protein Coding | 53 | GC18M027950 | 20.8751  | <a href="https://www.genecards.org/cgi-bin/carddisp.pl?gene=CDH2">https://www.genecards.org/cgi-bin/carddisp.pl?gene=CDH2</a>       |

|         |                                                               |                |    |             |          |                                                                                                                                     |
|---------|---------------------------------------------------------------|----------------|----|-------------|----------|-------------------------------------------------------------------------------------------------------------------------------------|
| ITGB3   | Integrin Subunit Beta 3<br>NADH:Ubiquinone                    | Protein Coding | 50 | GC17P047254 | 20.85393 | <a href="https://www.genecards.org/cgi-bin/carddisp.pl?gene=ITGB3">https://www.genecards.org/cgi-bin/carddisp.pl?gene=ITGB3</a>     |
| NDUFB9  | Oxidoreductase Subunit B9                                     | Protein Coding | 45 | GC08P124539 | 20.8491  | <a href="https://www.genecards.org/cgi-bin/carddisp.pl?gene=NDUFB9">https://www.genecards.org/cgi-bin/carddisp.pl?gene=NDUFB9</a>   |
| SLC10A1 | Solute Carrier Family 10 Member 1                             | Protein Coding | 45 | GC14M069775 | 20.82361 | <a href="https://www.genecards.org/cgi-bin/carddisp.pl?gene=SLC10A1">https://www.genecards.org/cgi-bin/carddisp.pl?gene=SLC10A1</a> |
| CR2     | Complement C3d Receptor 2                                     | Protein Coding | 45 | GC01P207454 | 20.82146 | <a href="https://www.genecards.org/cgi-bin/carddisp.pl?gene=CR2">https://www.genecards.org/cgi-bin/carddisp.pl?gene=CR2</a>         |
| SCO1    | Synthesis Of Cytochrome C Oxidase 1                           | Protein Coding | 47 | GC17M010672 | 20.80253 | <a href="https://www.genecards.org/cgi-bin/carddisp.pl?gene=SCO1">https://www.genecards.org/cgi-bin/carddisp.pl?gene=SCO1</a>       |
| TNFAIP3 | TNF Alpha Induced Protein 3                                   | Protein Coding | 48 | GC06P137866 | 20.7878  | <a href="https://www.genecards.org/cgi-bin/carddisp.pl?gene=TNFAIP3">https://www.genecards.org/cgi-bin/carddisp.pl?gene=TNFAIP3</a> |
| DYRK1A  | Dual Specificity Tyrosine Phosphorylation Regulated Kinase 1A | Protein Coding | 51 | GC21P037365 | 20.78073 | <a href="https://www.genecards.org/cgi-bin/carddisp.pl?gene=DYRK1A">https://www.genecards.org/cgi-bin/carddisp.pl?gene=DYRK1A</a>   |
| PAX6    | Paired Box 6                                                  | Protein Coding | 48 | GC11M031784 | 20.77972 | <a href="https://www.genecards.org/cgi-bin/carddisp.pl?gene=PAX6">https://www.genecards.org/cgi-bin/carddisp.pl?gene=PAX6</a>       |
| CX3CR1  | C-X3-C Motif Chemokine Receptor 1                             | Protein Coding | 45 | GC03M039279 | 20.74883 | <a href="https://www.genecards.org/cgi-bin/carddisp.pl?gene=CX3CR1">https://www.genecards.org/cgi-bin/carddisp.pl?gene=CX3CR1</a>   |
| PECAM1  | Platelet And Endothelial Cell Adhesion Molecule 1             | Protein Coding | 41 | GC17M064319 | 20.73357 | <a href="https://www.genecards.org/cgi-bin/carddisp.pl?gene=PECAM1">https://www.genecards.org/cgi-bin/carddisp.pl?gene=PECAM1</a>   |
| MYD88   | MYD88 Innate Immune Signal Transduction Adaptor               | Protein Coding | 50 | GC03P038139 | 20.71233 | <a href="https://www.genecards.org/cgi-bin/carddisp.pl?gene=MYD88">https://www.genecards.org/cgi-bin/carddisp.pl?gene=MYD88</a>     |
| FGF19   | Fibroblast Growth Factor 19                                   | Protein Coding | 44 | GC11M070382 | 20.71029 | <a href="https://www.genecards.org/cgi-bin/carddisp.pl?gene=FGF19">https://www.genecards.org/cgi-bin/carddisp.pl?gene=FGF19</a>     |
| CEBPB   | CCAAT Enhancer Binding Protein Beta                           | Protein Coding | 44 | GC20P050190 | 20.70691 | <a href="https://www.genecards.org/cgi-bin/carddisp.pl?gene=CEBPB">https://www.genecards.org/cgi-bin/carddisp.pl?gene=CEBPB</a>     |
| BCL2L1  | BCL2 Like 1                                                   | Protein Coding | 47 | GC20M031664 | 20.70552 | <a href="https://www.genecards.org/cgi-bin/carddisp.pl?gene=BCL2L1">https://www.genecards.org/cgi-bin/carddisp.pl?gene=BCL2L1</a>   |
| SLC18A2 | Solute Carrier Family 18 Member A2                            | Protein Coding | 48 | GC10P117241 | 20.69474 | <a href="https://www.genecards.org/cgi-bin/carddisp.pl?gene=SLC18A2">https://www.genecards.org/cgi-bin/carddisp.pl?gene=SLC18A2</a> |
| RUNX2   | RUNX Family Transcription Factor 2                            | Protein Coding | 48 | GC06P055427 | 20.67907 | <a href="https://www.genecards.org/cgi-bin/carddisp.pl?gene=RUNX2">https://www.genecards.org/cgi-bin/carddisp.pl?gene=RUNX2</a>     |
| IL18BP  | Interleukin 18 Binding Protein                                | Protein Coding | 40 | GC11P071998 | 20.65721 | <a href="https://www.genecards.org/cgi-bin/carddisp.pl?gene=IL18BP">https://www.genecards.org/cgi-bin/carddisp.pl?gene=IL18BP</a>   |
| ALDH3A1 | Aldehyde Dehydrogenase 3 Family Member A1                     | Protein Coding | 44 | GC17M019737 | 20.61052 | <a href="https://www.genecards.org/cgi-bin/carddisp.pl?gene=ALDH3A1">https://www.genecards.org/cgi-bin/carddisp.pl?gene=ALDH3A1</a> |

|         |                                                                                                   |                |    |             |          |                                                                                                                                     |
|---------|---------------------------------------------------------------------------------------------------|----------------|----|-------------|----------|-------------------------------------------------------------------------------------------------------------------------------------|
| FLT3    | Fms Related Receptor Tyrosine Kinase 3                                                            | Protein Coding | 53 | GC13M028003 | 20.57567 | <a href="https://www.genecards.org/cgi-bin/carddisp.pl?gene=FLT3">https://www.genecards.org/cgi-bin/carddisp.pl?gene=FLT3</a>       |
| LGALS3  | Galectin 3                                                                                        | Protein Coding | 45 | GC14P055124 | 20.56834 | <a href="https://www.genecards.org/cgi-bin/carddisp.pl?gene=LGALS3">https://www.genecards.org/cgi-bin/carddisp.pl?gene=LGALS3</a>   |
| ASL     | Argininosuccinate Lyase                                                                           | Protein Coding | 47 | GC07P066075 | 20.55681 | <a href="https://www.genecards.org/cgi-bin/carddisp.pl?gene=ASL">https://www.genecards.org/cgi-bin/carddisp.pl?gene=ASL</a>         |
| RPS6KB1 | Ribosomal Protein S6 Kinase B1                                                                    | Protein Coding | 50 | GC17P059893 | 20.55362 | <a href="https://www.genecards.org/cgi-bin/carddisp.pl?gene=RPS6KB1">https://www.genecards.org/cgi-bin/carddisp.pl?gene=RPS6KB1</a> |
| IL7R    | Interleukin 7 Receptor                                                                            | Protein Coding | 47 | GC05P035852 | 20.5457  | <a href="https://www.genecards.org/cgi-bin/carddisp.pl?gene=IL7R">https://www.genecards.org/cgi-bin/carddisp.pl?gene=IL7R</a>       |
| CDH23   | Cadherin Related 23                                                                               | Protein Coding | 43 | GC10P071396 | 20.53548 | <a href="https://www.genecards.org/cgi-bin/carddisp.pl?gene=CDH23">https://www.genecards.org/cgi-bin/carddisp.pl?gene=CDH23</a>     |
| FYN     | FYN Proto-Oncogene, Src Family Tyrosine Kinase                                                    | Protein Coding | 48 | GC06M111660 | 20.52723 | <a href="https://www.genecards.org/cgi-bin/carddisp.pl?gene=FYN">https://www.genecards.org/cgi-bin/carddisp.pl?gene=FYN</a>         |
| ENO2    | Enolase 2                                                                                         | Protein Coding | 48 | GC12P006913 | 20.5169  | <a href="https://www.genecards.org/cgi-bin/carddisp.pl?gene=ENO2">https://www.genecards.org/cgi-bin/carddisp.pl?gene=ENO2</a>       |
| FFAR3   | Free Fatty Acid Receptor 3                                                                        | Protein Coding | 38 | GC19P040640 | 20.49132 | <a href="https://www.genecards.org/cgi-bin/carddisp.pl?gene=FFAR3">https://www.genecards.org/cgi-bin/carddisp.pl?gene=FFAR3</a>     |
| NDUFS3  | NADH:Ubiquinone Oxidoreductase Core Subunit S3                                                    | Protein Coding | 48 | GC11P047567 | 20.49101 | <a href="https://www.genecards.org/cgi-bin/carddisp.pl?gene=NDUFS3">https://www.genecards.org/cgi-bin/carddisp.pl?gene=NDUFS3</a>   |
| TIMP2   | TIMP Metalloproteinase Inhibitor 2                                                                | Protein Coding | 44 | GC17M078852 | 20.49062 | <a href="https://www.genecards.org/cgi-bin/carddisp.pl?gene=TIMP2">https://www.genecards.org/cgi-bin/carddisp.pl?gene=TIMP2</a>     |
| IL21    | Interleukin 21                                                                                    | Protein Coding | 43 | GC04M122612 | 20.47485 | <a href="https://www.genecards.org/cgi-bin/carddisp.pl?gene=IL21">https://www.genecards.org/cgi-bin/carddisp.pl?gene=IL21</a>       |
| PDYN    | Prodynorphin                                                                                      | Protein Coding | 44 | GC20M001978 | 20.46194 | <a href="https://www.genecards.org/cgi-bin/carddisp.pl?gene=PDYN">https://www.genecards.org/cgi-bin/carddisp.pl?gene=PDYN</a>       |
| ACTC1   | Actin Alpha Cardiac Muscle 1                                                                      | Protein Coding | 43 | GC15M034788 | 20.45549 | <a href="https://www.genecards.org/cgi-bin/carddisp.pl?gene=ACTC1">https://www.genecards.org/cgi-bin/carddisp.pl?gene=ACTC1</a>     |
| SMARCB1 | SWI/SNF Related, Matrix Associated, Actin Dependent Regulator Of Chromatin, Subfamily B, Member 1 | Protein Coding | 46 | GC22P023786 | 20.43601 | <a href="https://www.genecards.org/cgi-bin/carddisp.pl?gene=SMARCB1">https://www.genecards.org/cgi-bin/carddisp.pl?gene=SMARCB1</a> |
| COL4A3  | Collagen Type IV Alpha 3 Chain                                                                    | Protein Coding | 45 | GC02P227164 | 20.41813 | <a href="https://www.genecards.org/cgi-bin/carddisp.pl?gene=COL4A3">https://www.genecards.org/cgi-bin/carddisp.pl?gene=COL4A3</a>   |
| CHMP2B  | Charged Multivesicular Body Protein 2B                                                            | Protein Coding | 45 | GC03P087227 | 20.4057  | <a href="https://www.genecards.org/cgi-bin/carddisp.pl?gene=CHMP2B">https://www.genecards.org/cgi-bin/carddisp.pl?gene=CHMP2B</a>   |



|          |                                                            |                |    |             |          |                                                                                                                                       |
|----------|------------------------------------------------------------|----------------|----|-------------|----------|---------------------------------------------------------------------------------------------------------------------------------------|
| SLC4A1   | Solute Carrier Family 4 Member 1 (Diego Blood Group)       | Protein Coding | 48 | GC17M044355 | 20.39626 | <a href="https://www.genecards.org/cgi-bin/carddisp.pl?gene=SLC4A1">https://www.genecards.org/cgi-bin/carddisp.pl?gene=SLC4A1</a>     |
| FLNC     | Filamin C                                                  | Protein Coding | 45 | GC07P128830 | 20.38033 | <a href="https://www.genecards.org/cgi-bin/carddisp.pl?gene=FLNC">https://www.genecards.org/cgi-bin/carddisp.pl?gene=FLNC</a>         |
| MIRLET7E | MicroRNA Let-7e                                            | RNA Gene       | 20 | GC19P051718 | 20.36852 | <a href="https://www.genecards.org/cgi-bin/carddisp.pl?gene=MIRLET7E">https://www.genecards.org/cgi-bin/carddisp.pl?gene=MIRLET7E</a> |
| MEG3     | Maternally Expressed 3                                     | RNA Gene       | 30 | GC14P106296 | 20.36535 | <a href="https://www.genecards.org/cgi-bin/carddisp.pl?gene=MEG3">https://www.genecards.org/cgi-bin/carddisp.pl?gene=MEG3</a>         |
| PARP1    | Poly(ADP-Ribose) Polymerase 1                              | Protein Coding | 50 | GC01M226360 | 20.35945 | <a href="https://www.genecards.org/cgi-bin/carddisp.pl?gene=PARP1">https://www.genecards.org/cgi-bin/carddisp.pl?gene=PARP1</a>       |
| NPM1     | Nucleophosmin 1                                            | Protein Coding | 50 | GC05P171387 | 20.34415 | <a href="https://www.genecards.org/cgi-bin/carddisp.pl?gene=NPM1">https://www.genecards.org/cgi-bin/carddisp.pl?gene=NPM1</a>         |
| CR1      | Complement C3b/C4b Receptor 1 (Knops Blood Group)          | Protein Coding | 45 | GC01P207496 | 20.33232 | <a href="https://www.genecards.org/cgi-bin/carddisp.pl?gene=CR1">https://www.genecards.org/cgi-bin/carddisp.pl?gene=CR1</a>           |
| NCAM1    | Neural Cell Adhesion Molecule 1                            | Protein Coding | 47 | GC11P112961 | 20.31113 | <a href="https://www.genecards.org/cgi-bin/carddisp.pl?gene=NCAM1">https://www.genecards.org/cgi-bin/carddisp.pl?gene=NCAM1</a>       |
| ABCA7    | ATP Binding Cassette Subfamily A Member 7                  | Protein Coding | 44 | GC19P001040 | 20.30239 | <a href="https://www.genecards.org/cgi-bin/carddisp.pl?gene=ABCA7">https://www.genecards.org/cgi-bin/carddisp.pl?gene=ABCA7</a>       |
| COL3A1   | Collagen Type III Alpha 1 Chain                            | Protein Coding | 47 | GC02P188974 | 20.26769 | <a href="https://www.genecards.org/cgi-bin/carddisp.pl?gene=COL3A1">https://www.genecards.org/cgi-bin/carddisp.pl?gene=COL3A1</a>     |
| CHGA     | Chromogranin A                                             | Protein Coding | 43 | GC14P092925 | 20.25076 | <a href="https://www.genecards.org/cgi-bin/carddisp.pl?gene=CHGA">https://www.genecards.org/cgi-bin/carddisp.pl?gene=CHGA</a>         |
| DNM1L    | Dynamin 1 Like                                             | Protein Coding | 48 | GC12P032679 | 20.20063 | <a href="https://www.genecards.org/cgi-bin/carddisp.pl?gene=DNM1L">https://www.genecards.org/cgi-bin/carddisp.pl?gene=DNM1L</a>       |
| PALB2    | Partner And Localizer Of BRCA2                             | Protein Coding | 43 | GC16M023603 | 20.19271 | <a href="https://www.genecards.org/cgi-bin/carddisp.pl?gene=PALB2">https://www.genecards.org/cgi-bin/carddisp.pl?gene=PALB2</a>       |
| CCL3     | C-C Motif Chemokine Ligand 3                               | Protein Coding | 40 | GC17M036088 | 20.1804  | <a href="https://www.genecards.org/cgi-bin/carddisp.pl?gene=CCL3">https://www.genecards.org/cgi-bin/carddisp.pl?gene=CCL3</a>         |
| F13A1    | Coagulation Factor XIII A Chain                            | Protein Coding | 47 | GC06M006144 | 20.17239 | <a href="https://www.genecards.org/cgi-bin/carddisp.pl?gene=F13A1">https://www.genecards.org/cgi-bin/carddisp.pl?gene=F13A1</a>       |
| ZAP70    | Zeta Chain Of T Cell Receptor Associated Protein Kinase 70 | Protein Coding | 52 | GC02P097696 | 20.15912 | <a href="https://www.genecards.org/cgi-bin/carddisp.pl?gene=ZAP70">https://www.genecards.org/cgi-bin/carddisp.pl?gene=ZAP70</a>       |
| ICOSLG   | Inducible T Cell Costimulator Ligand                       | Protein Coding | 39 | GC21M044222 | 20.159   | <a href="https://www.genecards.org/cgi-bin/carddisp.pl?gene=ICOSLG">https://www.genecards.org/cgi-bin/carddisp.pl?gene=ICOSLG</a>     |
| SERPINF2 | Serpin Family F Member 2                                   | Protein Coding | 44 | GC17P001742 | 20.15118 | <a href="https://www.genecards.org/cgi-bin/carddisp.pl?gene=SERPINF2">https://www.genecards.org/cgi-bin/carddisp.pl?gene=SERPINF2</a> |
| MB       | Myoglobin                                                  | Protein Coding | 44 | GC22M035606 | 20.14612 | <a href="https://www.genecards.org/cgi-bin/carddisp.pl?gene=MB">https://www.genecards.org/cgi-bin/carddisp.pl?gene=MB</a>             |

|        |                                                                |                |    |             |          |                                                                                                                                   |
|--------|----------------------------------------------------------------|----------------|----|-------------|----------|-----------------------------------------------------------------------------------------------------------------------------------|
| ABCG2  | ATP Binding Cassette Subfamily G Member 2 (Junior Blood Group) | Protein Coding | 51 | GC04M088090 | 20.13269 | <a href="https://www.genecards.org/cgi-bin/carddisp.pl?gene=ABCG2">https://www.genecards.org/cgi-bin/carddisp.pl?gene=ABCG2</a>   |
| MIR9-1 | MicroRNA 9-1                                                   | RNA Gene       | 20 | GC01M156420 | 20.12142 | <a href="https://www.genecards.org/cgi-bin/carddisp.pl?gene=MIR9-1">https://www.genecards.org/cgi-bin/carddisp.pl?gene=MIR9-1</a> |
| GC     | GC Vitamin D Binding Protein                                   | Protein Coding | 44 | GC04M071741 | 20.12044 | <a href="https://www.genecards.org/cgi-bin/carddisp.pl?gene=GC">https://www.genecards.org/cgi-bin/carddisp.pl?gene=GC</a>         |
| EIF4G1 | Eukaryotic Translation Initiation Factor 4 Gamma 1             | Protein Coding | 47 | GC03P184314 | 20.10441 | <a href="https://www.genecards.org/cgi-bin/carddisp.pl?gene=EIF4G1">https://www.genecards.org/cgi-bin/carddisp.pl?gene=EIF4G1</a> |
| PHKA1  | Phosphorylase Kinase Regulatory Subunit Alpha 1                | Protein Coding | 44 | GC0XM072578 | 20.09604 | <a href="https://www.genecards.org/cgi-bin/carddisp.pl?gene=PHKA1">https://www.genecards.org/cgi-bin/carddisp.pl?gene=PHKA1</a>   |
| ADHFE1 | Alcohol Dehydrogenase Iron Containing 1                        | Protein Coding | 38 | GC08P066432 | 20.08615 | <a href="https://www.genecards.org/cgi-bin/carddisp.pl?gene=ADHFE1">https://www.genecards.org/cgi-bin/carddisp.pl?gene=ADHFE1</a> |
| COPA   | COPI Coat Complex Subunit Alpha                                | Protein Coding | 43 | GC01M160288 | 20.08255 | <a href="https://www.genecards.org/cgi-bin/carddisp.pl?gene=COPA">https://www.genecards.org/cgi-bin/carddisp.pl?gene=COPA</a>     |
| PDX1   | Pancreatic And Duodenal Homeobox 1                             | Protein Coding | 48 | GC13P027921 | 20.07712 | <a href="https://www.genecards.org/cgi-bin/carddisp.pl?gene=PDX1">https://www.genecards.org/cgi-bin/carddisp.pl?gene=PDX1</a>     |
| TNNT2  | Troponin T2, Cardiac Type                                      | Protein Coding | 50 | GC01M201359 | 20.04509 | <a href="https://www.genecards.org/cgi-bin/carddisp.pl?gene=TNNT2">https://www.genecards.org/cgi-bin/carddisp.pl?gene=TNNT2</a>   |
| MIR204 | MicroRNA 204                                                   | RNA Gene       | 21 | GC09M070809 | 20.04273 | <a href="https://www.genecards.org/cgi-bin/carddisp.pl?gene=MIR204">https://www.genecards.org/cgi-bin/carddisp.pl?gene=MIR204</a> |
| CD19   | CD19 Molecule                                                  | Protein Coding | 50 | GC16P032270 | 20.03776 | <a href="https://www.genecards.org/cgi-bin/carddisp.pl?gene=CD19">https://www.genecards.org/cgi-bin/carddisp.pl?gene=CD19</a>     |
| SLC1A2 | Solute Carrier Family 1 Member 2                               | Protein Coding | 50 | GC11M035252 | 20.03393 | <a href="https://www.genecards.org/cgi-bin/carddisp.pl?gene=SLC1A2">https://www.genecards.org/cgi-bin/carddisp.pl?gene=SLC1A2</a> |
| USH2A  | Usherin                                                        | Protein Coding | 38 | GC01M215622 | 19.99977 | <a href="https://www.genecards.org/cgi-bin/carddisp.pl?gene=USH2A">https://www.genecards.org/cgi-bin/carddisp.pl?gene=USH2A</a>   |
| SORD   | Sorbitol Dehydrogenase                                         | Protein Coding | 47 | GC15P045023 | 19.99626 | <a href="https://www.genecards.org/cgi-bin/carddisp.pl?gene=SORD">https://www.genecards.org/cgi-bin/carddisp.pl?gene=SORD</a>     |
| PGM1   | Phosphoglucomutase 1                                           | Protein Coding | 49 | GC01P063593 | 19.99465 | <a href="https://www.genecards.org/cgi-bin/carddisp.pl?gene=PGM1">https://www.genecards.org/cgi-bin/carddisp.pl?gene=PGM1</a>     |
| MYH11  | Myosin Heavy Chain 11                                          | Protein Coding | 46 | GC16M015704 | 19.99353 | <a href="https://www.genecards.org/cgi-bin/carddisp.pl?gene=MYH11">https://www.genecards.org/cgi-bin/carddisp.pl?gene=MYH11</a>   |
| TSPO   | Translocator Protein                                           | Protein Coding | 44 | GC22P043151 | 19.97203 | <a href="https://www.genecards.org/cgi-bin/carddisp.pl?gene=TSPO">https://www.genecards.org/cgi-bin/carddisp.pl?gene=TSPO</a>     |
| CSF1   | Colony Stimulating Factor 1                                    | Protein Coding | 44 | GC01P109911 | 19.95462 | <a href="https://www.genecards.org/cgi-bin/carddisp.pl?gene=CSF1">https://www.genecards.org/cgi-bin/carddisp.pl?gene=CSF1</a>     |
| RARB   | Retinoic Acid Receptor Beta                                    | Protein Coding | 51 | GC03P024830 | 19.95306 | <a href="https://www.genecards.org/cgi-bin/carddisp.pl?gene=RARB">https://www.genecards.org/cgi-bin/carddisp.pl?gene=RARB</a>     |

|          |                                                                     |                |    |             |          |                                                                                                                                       |
|----------|---------------------------------------------------------------------|----------------|----|-------------|----------|---------------------------------------------------------------------------------------------------------------------------------------|
| KCNH2    | Potassium Voltage-Gated Channel Subfamily H Member 2                | Protein Coding | 50 | GC07M150944 | 19.94983 | <a href="https://www.genecards.org/cgi-bin/carddisp.pl?gene=KCNH2">https://www.genecards.org/cgi-bin/carddisp.pl?gene=KCNH2</a>       |
| ITGB1    | Integrin Subunit Beta 1                                             | Protein Coding | 51 | GC10M032890 | 19.94729 | <a href="https://www.genecards.org/cgi-bin/carddisp.pl?gene=ITGB1">https://www.genecards.org/cgi-bin/carddisp.pl?gene=ITGB1</a>       |
| KNG1     | Kininogen 1                                                         | Protein Coding | 45 | GC03P186717 | 19.92728 | <a href="https://www.genecards.org/cgi-bin/carddisp.pl?gene=KNG1">https://www.genecards.org/cgi-bin/carddisp.pl?gene=KNG1</a>         |
| GNAQ     | G Protein Subunit Alpha Q                                           | Protein Coding | 50 | GC09M077716 | 19.92713 | <a href="https://www.genecards.org/cgi-bin/carddisp.pl?gene=GNAQ">https://www.genecards.org/cgi-bin/carddisp.pl?gene=GNAQ</a>         |
| CDK1     | Cyclin Dependent Kinase 1                                           | Protein Coding | 47 | GC10P060772 | 19.92036 | <a href="https://www.genecards.org/cgi-bin/carddisp.pl?gene=CDK1">https://www.genecards.org/cgi-bin/carddisp.pl?gene=CDK1</a>         |
| SCN4A    | Sodium Voltage-Gated Channel Alpha Subunit 4                        | Protein Coding | 45 | GC17M063938 | 19.90688 | <a href="https://www.genecards.org/cgi-bin/carddisp.pl?gene=SCN4A">https://www.genecards.org/cgi-bin/carddisp.pl?gene=SCN4A</a>       |
| SULT2A1  | Sulfotransferase Family 2A Member 1                                 | Protein Coding | 45 | GC19M047870 | 19.89643 | <a href="https://www.genecards.org/cgi-bin/carddisp.pl?gene=SULT2A1">https://www.genecards.org/cgi-bin/carddisp.pl?gene=SULT2A1</a>   |
| PINK1-AS | PINK1 Antisense RNA                                                 | RNA Gene       | 13 | GC01M020642 | 19.8783  | <a href="https://www.genecards.org/cgi-bin/carddisp.pl?gene=PINK1-AS">https://www.genecards.org/cgi-bin/carddisp.pl?gene=PINK1-AS</a> |
| BBS4     | Bardet-Biedl Syndrome 4                                             | Protein Coding | 42 | GC15P072686 | 19.87511 | <a href="https://www.genecards.org/cgi-bin/carddisp.pl?gene=BBS4">https://www.genecards.org/cgi-bin/carddisp.pl?gene=BBS4</a>         |
| MIR429   | MicroRNA 429                                                        | RNA Gene       | 19 | GC01P002023 | 19.87298 | <a href="https://www.genecards.org/cgi-bin/carddisp.pl?gene=MIR429">https://www.genecards.org/cgi-bin/carddisp.pl?gene=MIR429</a>     |
| IKBK     | Inhibitor Of Nuclear Factor Kappa B Kinase Regulatory Subunit Gamma | Protein Coding | 48 | GC0XP154541 | 19.86198 | <a href="https://www.genecards.org/cgi-bin/carddisp.pl?gene=IKBK">https://www.genecards.org/cgi-bin/carddisp.pl?gene=IKBK</a>         |
| MIR26A1  | MicroRNA 26a-1                                                      | RNA Gene       | 20 | GC03P037969 | 19.85808 | <a href="https://www.genecards.org/cgi-bin/carddisp.pl?gene=MIR26A1">https://www.genecards.org/cgi-bin/carddisp.pl?gene=MIR26A1</a>   |
| ANXA5    | Annexin A5                                                          | Protein Coding | 47 | GC04M121667 | 19.85589 | <a href="https://www.genecards.org/cgi-bin/carddisp.pl?gene=ANXA5">https://www.genecards.org/cgi-bin/carddisp.pl?gene=ANXA5</a>       |
| SBF2-AS1 | SBF2 Antisense RNA 1                                                | RNA Gene       | 16 | GC11P009758 | 19.83401 | <a href="https://www.genecards.org/cgi-bin/carddisp.pl?gene=SBF2-AS1">https://www.genecards.org/cgi-bin/carddisp.pl?gene=SBF2-AS1</a> |
| UROS     | Uroporphyrinogen III Synthase                                       | Protein Coding | 43 | GC10M125784 | 19.82992 | <a href="https://www.genecards.org/cgi-bin/carddisp.pl?gene=UROS">https://www.genecards.org/cgi-bin/carddisp.pl?gene=UROS</a>         |
| TULP1    | TUB Like Protein 1 Yes1                                             | Protein Coding | 43 | GC06M047024 | 19.82913 | <a href="https://www.genecards.org/cgi-bin/carddisp.pl?gene=TULP1">https://www.genecards.org/cgi-bin/carddisp.pl?gene=TULP1</a>       |
| YAP1     | Associated Transcriptional Regulator                                | Protein Coding | 48 | GC11P102110 | 19.82795 | <a href="https://www.genecards.org/cgi-bin/carddisp.pl?gene=YAP1">https://www.genecards.org/cgi-bin/carddisp.pl?gene=YAP1</a>         |
| RAG2     | Recombination Activating 2 L1 Cell                                  | Protein Coding | 43 | GC11M036575 | 19.8225  | <a href="https://www.genecards.org/cgi-bin/carddisp.pl?gene=RAG2">https://www.genecards.org/cgi-bin/carddisp.pl?gene=RAG2</a>         |
| L1CAM    | Adhesion Molecule                                                   | Protein Coding | 47 | GC0XM153864 | 19.81722 | <a href="https://www.genecards.org/cgi-bin/carddisp.pl?gene=L1CAM">https://www.genecards.org/cgi-bin/carddisp.pl?gene=L1CAM</a>       |

|        |                                                          |                |    |             |          |                                                                                                                                   |
|--------|----------------------------------------------------------|----------------|----|-------------|----------|-----------------------------------------------------------------------------------------------------------------------------------|
| UQCRB  | Ubiquinol-Cytochrome C Reductase Binding Protein         | Protein Coding | 44 | GC08M096225 | 19.80413 | <a href="https://www.genecards.org/cgi-bin/carddisp.pl?gene=UQCRB">https://www.genecards.org/cgi-bin/carddisp.pl?gene=UQCRB</a>   |
| RPS27A | Ribosomal Protein S27a                                   | Protein Coding | 44 | GC02P055231 | 19.78513 | <a href="https://www.genecards.org/cgi-bin/carddisp.pl?gene=RPS27A">https://www.genecards.org/cgi-bin/carddisp.pl?gene=RPS27A</a> |
| NEB    | Nebulin                                                  | Protein Coding | 41 | GC02M151485 | 19.77995 | <a href="https://www.genecards.org/cgi-bin/carddisp.pl?gene=NEB">https://www.genecards.org/cgi-bin/carddisp.pl?gene=NEB</a>       |
| ERCC4  | ERCC Excision Repair 4, Endonuclease Catalytic Subunit   | Protein Coding | 46 | GC16P013920 | 19.76361 | <a href="https://www.genecards.org/cgi-bin/carddisp.pl?gene=ERCC4">https://www.genecards.org/cgi-bin/carddisp.pl?gene=ERCC4</a>   |
| SPG7   | SPG7 Matrix AAA Peptidase Subunit, Paraplegin            | Protein Coding | 44 | GC16P089790 | 19.76343 | <a href="https://www.genecards.org/cgi-bin/carddisp.pl?gene=SPG7">https://www.genecards.org/cgi-bin/carddisp.pl?gene=SPG7</a>     |
| MIR483 | MicroRNA 483                                             | RNA Gene       | 18 | GC11M002219 | 19.75251 | <a href="https://www.genecards.org/cgi-bin/carddisp.pl?gene=MIR483">https://www.genecards.org/cgi-bin/carddisp.pl?gene=MIR483</a> |
| LIVAR  | Liver Cell Viability Associated LncRNA                   | RNA Gene       | 10 | GC18M070336 | 19.73477 | <a href="https://www.genecards.org/cgi-bin/carddisp.pl?gene=LIVAR">https://www.genecards.org/cgi-bin/carddisp.pl?gene=LIVAR</a>   |
| PRPS1  | Phosphoribosyl Pyrophosphate Synthetase 1                | Protein Coding | 47 | GC0XP107628 | 19.71732 | <a href="https://www.genecards.org/cgi-bin/carddisp.pl?gene=PRPS1">https://www.genecards.org/cgi-bin/carddisp.pl?gene=PRPS1</a>   |
| PNKP   | Polynucleotide Kinase 3'-Phosphatase Enhancer Of Zeste 2 | Protein Coding | 46 | GC19M049861 | 19.70959 | <a href="https://www.genecards.org/cgi-bin/carddisp.pl?gene=PNKP">https://www.genecards.org/cgi-bin/carddisp.pl?gene=PNKP</a>     |
| EZH2   | Polycomb Repressive Complex 2 Subunit                    | Protein Coding | 54 | GC07M148807 | 19.70585 | <a href="https://www.genecards.org/cgi-bin/carddisp.pl?gene=EZH2">https://www.genecards.org/cgi-bin/carddisp.pl?gene=EZH2</a>     |
| ALDOA  | Aldolase, Fructose-Bisphosphate A                        | Protein Coding | 49 | GC16P030064 | 19.70424 | <a href="https://www.genecards.org/cgi-bin/carddisp.pl?gene=ALDOA">https://www.genecards.org/cgi-bin/carddisp.pl?gene=ALDOA</a>   |
| RAG1   | Recombination Activating 1 MKKS                          | Protein Coding | 46 | GC11P036520 | 19.68536 | <a href="https://www.genecards.org/cgi-bin/carddisp.pl?gene=RAG1">https://www.genecards.org/cgi-bin/carddisp.pl?gene=RAG1</a>     |
| MKKS   | Centrosomal Shuttling Protein                            | Protein Coding | 40 | GC20M010424 | 19.68426 | <a href="https://www.genecards.org/cgi-bin/carddisp.pl?gene=MKKS">https://www.genecards.org/cgi-bin/carddisp.pl?gene=MKKS</a>     |
| TRIM2  | Tripartite Motif Containing 2                            | Protein Coding | 41 | GC04P153152 | 19.6751  | <a href="https://www.genecards.org/cgi-bin/carddisp.pl?gene=TRIM2">https://www.genecards.org/cgi-bin/carddisp.pl?gene=TRIM2</a>   |
| MIR34C | MicroRNA 34c                                             | RNA Gene       | 20 | GC11P111591 | 19.65926 | <a href="https://www.genecards.org/cgi-bin/carddisp.pl?gene=MIR34C">https://www.genecards.org/cgi-bin/carddisp.pl?gene=MIR34C</a> |
| MFSD2A | Major Facilitator Superfamily Domain Containing 2A       | Protein Coding | 39 | GC01P039955 | 19.64758 | <a href="https://www.genecards.org/cgi-bin/carddisp.pl?gene=MFSD2A">https://www.genecards.org/cgi-bin/carddisp.pl?gene=MFSD2A</a> |
| MBP    | Myelin Basic Protein                                     | Protein Coding | 45 | GC18M076978 | 19.6423  | <a href="https://www.genecards.org/cgi-bin/carddisp.pl?gene=MBP">https://www.genecards.org/cgi-bin/carddisp.pl?gene=MBP</a>       |

|        |                                                                 |                |    |             |          |                                                                                                                                   |
|--------|-----------------------------------------------------------------|----------------|----|-------------|----------|-----------------------------------------------------------------------------------------------------------------------------------|
| GNMT   | Glycine N-Methyltransferase                                     | Protein Coding | 46 | GC06P042960 | 19.63456 | <a href="https://www.genecards.org/cgi-bin/carddisp.pl?gene=GNMT">https://www.genecards.org/cgi-bin/carddisp.pl?gene=GNMT</a>     |
| PDGFRA | Platelet Derived Growth Factor Receptor Alpha                   | Protein Coding | 55 | GC04P054229 | 19.63359 | <a href="https://www.genecards.org/cgi-bin/carddisp.pl?gene=PDGFRA">https://www.genecards.org/cgi-bin/carddisp.pl?gene=PDGFRA</a> |
| DDC    | Dopa Decarboxylase                                              | Protein Coding | 53 | GC07M050458 | 19.62644 | <a href="https://www.genecards.org/cgi-bin/carddisp.pl?gene=DDC">https://www.genecards.org/cgi-bin/carddisp.pl?gene=DDC</a>       |
| ACSL3  | Acyl-CoA Synthetase Long Chain Family Member 3                  | Protein Coding | 41 | GC02P222860 | 19.61269 | <a href="https://www.genecards.org/cgi-bin/carddisp.pl?gene=ACSL3">https://www.genecards.org/cgi-bin/carddisp.pl?gene=ACSL3</a>   |
| CHD7   | Chromodomain Helicase DNA Binding Protein 7                     | Protein Coding | 46 | GC08P060678 | 19.59666 | <a href="https://www.genecards.org/cgi-bin/carddisp.pl?gene=CHD7">https://www.genecards.org/cgi-bin/carddisp.pl?gene=CHD7</a>     |
| CYP2U1 | Cytochrome P450 Family 2 Subfamily U Member 1                   | Protein Coding | 44 | GC04P107931 | 19.59149 | <a href="https://www.genecards.org/cgi-bin/carddisp.pl?gene=CYP2U1">https://www.genecards.org/cgi-bin/carddisp.pl?gene=CYP2U1</a> |
| CHUK   | Component Of Inhibitor Of Nuclear Factor Kappa B Kinase Complex | Protein Coding | 52 | GC10M100188 | 19.56647 | <a href="https://www.genecards.org/cgi-bin/carddisp.pl?gene=CHUK">https://www.genecards.org/cgi-bin/carddisp.pl?gene=CHUK</a>     |
| PPA2   | Inorganic Pyrophosphatase 2                                     | Protein Coding | 42 | GC04M105369 | 19.56451 | <a href="https://www.genecards.org/cgi-bin/carddisp.pl?gene=PPA2">https://www.genecards.org/cgi-bin/carddisp.pl?gene=PPA2</a>     |
| HBG2   | Hemoglobin Subunit Gamma 2                                      | Protein Coding | 43 | GC11M005442 | 19.55492 | <a href="https://www.genecards.org/cgi-bin/carddisp.pl?gene=HBG2">https://www.genecards.org/cgi-bin/carddisp.pl?gene=HBG2</a>     |
| MKI67  | Marker Of Proliferation Ki-67                                   | Protein Coding | 45 | GC10M128096 | 19.5453  | <a href="https://www.genecards.org/cgi-bin/carddisp.pl?gene=MKI67">https://www.genecards.org/cgi-bin/carddisp.pl?gene=MKI67</a>   |
| FXN    | Frxataxin                                                       | Protein Coding | 47 | GC09P069035 | 19.51641 | <a href="https://www.genecards.org/cgi-bin/carddisp.pl?gene=FXN">https://www.genecards.org/cgi-bin/carddisp.pl?gene=FXN</a>       |
| CCL11  | C-C Motif Chemokine Ligand 11                                   | Protein Coding | 44 | GC17P034285 | 19.51405 | <a href="https://www.genecards.org/cgi-bin/carddisp.pl?gene=CCL11">https://www.genecards.org/cgi-bin/carddisp.pl?gene=CCL11</a>   |
| PRKCA  | Protein Kinase C Alpha                                          | Protein Coding | 52 | GC17P066302 | 19.50887 | <a href="https://www.genecards.org/cgi-bin/carddisp.pl?gene=PRKCA">https://www.genecards.org/cgi-bin/carddisp.pl?gene=PRKCA</a>   |
| RAC1   | Rac Family Small GTPase 1                                       | Protein Coding | 50 | GC07P006377 | 19.50507 | <a href="https://www.genecards.org/cgi-bin/carddisp.pl?gene=RAC1">https://www.genecards.org/cgi-bin/carddisp.pl?gene=RAC1</a>     |
| LRPPRC | Leucine Rich Pentatricopeptide Repeat Containing                | Protein Coding | 43 | GC02M043850 | 19.50468 | <a href="https://www.genecards.org/cgi-bin/carddisp.pl?gene=LRPPRC">https://www.genecards.org/cgi-bin/carddisp.pl?gene=LRPPRC</a> |
| RYR2   | Ryanodine Receptor 2                                            | Protein Coding | 48 | GC01P237042 | 19.48267 | <a href="https://www.genecards.org/cgi-bin/carddisp.pl?gene=RYR2">https://www.genecards.org/cgi-bin/carddisp.pl?gene=RYR2</a>     |
| ADCY10 | Adenylate Cyclase 10                                            | Protein Coding | 45 | GC01M167809 | 19.4616  | <a href="https://www.genecards.org/cgi-bin/carddisp.pl?gene=ADCY10">https://www.genecards.org/cgi-bin/carddisp.pl?gene=ADCY10</a> |
| PGR    | Progesterone Receptor                                           | Protein Coding | 51 | GC11M101030 | 19.45818 | <a href="https://www.genecards.org/cgi-bin/carddisp.pl?gene=PGR">https://www.genecards.org/cgi-bin/carddisp.pl?gene=PGR</a>       |

|          |                                                     |                |    |             |          |                                                                                                                                       |
|----------|-----------------------------------------------------|----------------|----|-------------|----------|---------------------------------------------------------------------------------------------------------------------------------------|
| TPH1     | Tryptophan Hydroxylase 1                            | Protein Coding | 45 | GC11M018040 | 19.42734 | <a href="https://www.genecards.org/cgi-bin/carddisp.pl?gene=TPH1">https://www.genecards.org/cgi-bin/carddisp.pl?gene=TPH1</a>         |
| SERPINA6 | Serpin Family A Member 6                            | Protein Coding | 44 | GC14M095823 | 19.42633 | <a href="https://www.genecards.org/cgi-bin/carddisp.pl?gene=SERPINA6">https://www.genecards.org/cgi-bin/carddisp.pl?gene=SERPINA6</a> |
| SCN1A    | Sodium Voltage-Gated Channel Alpha Subunit 1        | Protein Coding | 47 | GC02M165989 | 19.41956 | <a href="https://www.genecards.org/cgi-bin/carddisp.pl?gene=SCN1A">https://www.genecards.org/cgi-bin/carddisp.pl?gene=SCN1A</a>       |
| NEU1     | Neuraminidase 1                                     | Protein Coding | 45 | GC06M031857 | 19.41008 | <a href="https://www.genecards.org/cgi-bin/carddisp.pl?gene=NEU1">https://www.genecards.org/cgi-bin/carddisp.pl?gene=NEU1</a>         |
| LDHA     | Lactate Dehydrogenase A                             | Protein Coding | 52 | GC11P018394 | 19.39824 | <a href="https://www.genecards.org/cgi-bin/carddisp.pl?gene=LDHA">https://www.genecards.org/cgi-bin/carddisp.pl?gene=LDHA</a>         |
| BBS12    | Bardet-Biedl Syndrome 12                            | Protein Coding | 34 | GC04P122702 | 19.37847 | <a href="https://www.genecards.org/cgi-bin/carddisp.pl?gene=BBS12">https://www.genecards.org/cgi-bin/carddisp.pl?gene=BBS12</a>       |
| FAAH2    | Fatty Acid Amide Hydrolase 2                        | Protein Coding | 37 | GC0XP057121 | 19.3499  | <a href="https://www.genecards.org/cgi-bin/carddisp.pl?gene=FAAH2">https://www.genecards.org/cgi-bin/carddisp.pl?gene=FAAH2</a>       |
| PMP2     | Peripheral Myelin Protein 2                         | Protein Coding | 43 | GC08M081440 | 19.3472  | <a href="https://www.genecards.org/cgi-bin/carddisp.pl?gene=PMP2">https://www.genecards.org/cgi-bin/carddisp.pl?gene=PMP2</a>         |
| SELL     | Selectin L                                          | Protein Coding | 43 | GC01M169690 | 19.34113 | <a href="https://www.genecards.org/cgi-bin/carddisp.pl?gene=SELL">https://www.genecards.org/cgi-bin/carddisp.pl?gene=SELL</a>         |
| MIR27B   | MicroRNA 27b                                        | RNA Gene       | 20 | GC09P095097 | 19.33519 | <a href="https://www.genecards.org/cgi-bin/carddisp.pl?gene=MIR27B">https://www.genecards.org/cgi-bin/carddisp.pl?gene=MIR27B</a>     |
| ITPR1    | Inositol 1,4,5-Trisphosphate Receptor Type 1        | Protein Coding | 49 | GC03P004486 | 19.32337 | <a href="https://www.genecards.org/cgi-bin/carddisp.pl?gene=ITPR1">https://www.genecards.org/cgi-bin/carddisp.pl?gene=ITPR1</a>       |
| ITGB2    | Integrin Subunit Beta 2                             | Protein Coding | 51 | GC21M044885 | 19.31633 | <a href="https://www.genecards.org/cgi-bin/carddisp.pl?gene=ITGB2">https://www.genecards.org/cgi-bin/carddisp.pl?gene=ITGB2</a>       |
| RHOA     | Ras Homolog Family Member A                         | Protein Coding | 48 | GC03M049359 | 19.31543 | <a href="https://www.genecards.org/cgi-bin/carddisp.pl?gene=RHOA">https://www.genecards.org/cgi-bin/carddisp.pl?gene=RHOA</a>         |
| UCP3     | Uncoupling Protein 3                                | Protein Coding | 44 | GC11M074000 | 19.30833 | <a href="https://www.genecards.org/cgi-bin/carddisp.pl?gene=UCP3">https://www.genecards.org/cgi-bin/carddisp.pl?gene=UCP3</a>         |
| SCN2A    | Sodium Voltage-Gated Channel Alpha Subunit 2        | Protein Coding | 48 | GC02P165194 | 19.29945 | <a href="https://www.genecards.org/cgi-bin/carddisp.pl?gene=SCN2A">https://www.genecards.org/cgi-bin/carddisp.pl?gene=SCN2A</a>       |
| PNPLA6   | Patatin Like Phospholipase Domain Containing 6      | Protein Coding | 45 | GC19P007534 | 19.26455 | <a href="https://www.genecards.org/cgi-bin/carddisp.pl?gene=PNPLA6">https://www.genecards.org/cgi-bin/carddisp.pl?gene=PNPLA6</a>     |
| SYK      | Spleen Associated Tyrosine Kinase                   | Protein Coding | 51 | GC09P091373 | 19.26337 | <a href="https://www.genecards.org/cgi-bin/carddisp.pl?gene=SYK">https://www.genecards.org/cgi-bin/carddisp.pl?gene=SYK</a>           |
| HSP90AA1 | Heat Shock Protein 90 Alpha Family Class A Member 1 | Protein Coding | 48 | GC14M102080 | 19.26155 | <a href="https://www.genecards.org/cgi-bin/carddisp.pl?gene=HSP90AA1">https://www.genecards.org/cgi-bin/carddisp.pl?gene=HSP90AA1</a> |
| MIR192   | MicroRNA 192                                        | RNA Gene       | 22 | GC11M064891 | 19.24969 | <a href="https://www.genecards.org/cgi-bin/carddisp.pl?gene=MIR192">https://www.genecards.org/cgi-bin/carddisp.pl?gene=MIR192</a>     |
| SORL1    | Sortilin Related Receptor 1                         | Protein Coding | 45 | GC11P121452 | 19.24726 | <a href="https://www.genecards.org/cgi-bin/carddisp.pl?gene=SORL1">https://www.genecards.org/cgi-bin/carddisp.pl?gene=SORL1</a>       |

|        |                                                            |                   |    |                 |          |                                                                                                                                   |
|--------|------------------------------------------------------------|-------------------|----|-----------------|----------|-----------------------------------------------------------------------------------------------------------------------------------|
| ERBB3  | Erb-B2<br>Receptor<br>Tyrosine Kinase<br>3                 | Protein<br>Coding | 54 | GC12P0563<br>76 | 19.24438 | <a href="https://www.genecards.org/cgi-bin/carddisp.pl?gene=ERBB3">https://www.genecards.org/cgi-bin/carddisp.pl?gene=ERBB3</a>   |
| EPRS1  | Glutamyl-<br>Prolyl-TRNA<br>Synthetase 1                   | Protein<br>Coding | 37 | GC01M219<br>969 | 19.23979 | <a href="https://www.genecards.org/cgi-bin/carddisp.pl?gene=EPRS1">https://www.genecards.org/cgi-bin/carddisp.pl?gene=EPRS1</a>   |
| IL15   | Interleukin 15                                             | Protein<br>Coding | 41 | GC04P1416<br>36 | 19.22407 | <a href="https://www.genecards.org/cgi-bin/carddisp.pl?gene=IL15">https://www.genecards.org/cgi-bin/carddisp.pl?gene=IL15</a>     |
| CYB5R3 | Cytochrome B5<br>Reductase 3                               | Protein<br>Coding | 45 | GC22M042<br>617 | 19.22358 | <a href="https://www.genecards.org/cgi-bin/carddisp.pl?gene=CYB5R3">https://www.genecards.org/cgi-bin/carddisp.pl?gene=CYB5R3</a> |
| SOX9   | SRY-Box<br>Transcription<br>Factor 9                       | Protein<br>Coding | 48 | GC17P0721<br>21 | 19.21017 | <a href="https://www.genecards.org/cgi-bin/carddisp.pl?gene=SOX9">https://www.genecards.org/cgi-bin/carddisp.pl?gene=SOX9</a>     |
| F10    | Coagulation<br>Factor X                                    | Protein<br>Coding | 50 | GC13P1131<br>22 | 19.20737 | <a href="https://www.genecards.org/cgi-bin/carddisp.pl?gene=F10">https://www.genecards.org/cgi-bin/carddisp.pl?gene=F10</a>       |
| MMP14  | Matrix<br>Metallopeptida<br>se 14                          | Protein<br>Coding | 52 | GC14P0263<br>02 | 19.17437 | <a href="https://www.genecards.org/cgi-bin/carddisp.pl?gene=MMP14">https://www.genecards.org/cgi-bin/carddisp.pl?gene=MMP14</a>   |
| ITGA2B | Integrin<br>Subunit Alpha<br>2b                            | Protein<br>Coding | 51 | GC17M044<br>442 | 19.16889 | <a href="https://www.genecards.org/cgi-bin/carddisp.pl?gene=ITGA2B">https://www.genecards.org/cgi-bin/carddisp.pl?gene=ITGA2B</a> |
| DKK1   | Dickkopf WNT<br>Signaling<br>Pathway<br>Inhibitor 1        | Protein<br>Coding | 45 | GC10P0523<br>14 | 19.16834 | <a href="https://www.genecards.org/cgi-bin/carddisp.pl?gene=DKK1">https://www.genecards.org/cgi-bin/carddisp.pl?gene=DKK1</a>     |
| WFS1   | Wolframin ER<br>Transmembran<br>e Glycoprotein             | Protein<br>Coding | 46 | GC04P0062<br>60 | 19.16253 | <a href="https://www.genecards.org/cgi-bin/carddisp.pl?gene=WFS1">https://www.genecards.org/cgi-bin/carddisp.pl?gene=WFS1</a>     |
| TGFA   | Transforming<br>Growth Factor<br>Alpha                     | Protein<br>Coding | 46 | GC02M070<br>447 | 19.1429  | <a href="https://www.genecards.org/cgi-bin/carddisp.pl?gene=TGFA">https://www.genecards.org/cgi-bin/carddisp.pl?gene=TGFA</a>     |
| ADAR   | Adenosine<br>Deaminase<br>RNA Specific                     | Protein<br>Coding | 45 | GC01M154<br>582 | 19.1289  | <a href="https://www.genecards.org/cgi-bin/carddisp.pl?gene=ADAR">https://www.genecards.org/cgi-bin/carddisp.pl?gene=ADAR</a>     |
| PTGS1  | Prostaglandin-<br>Endoperoxide<br>Synthase 1               | Protein<br>Coding | 47 | GC09P1223<br>70 | 19.1281  | <a href="https://www.genecards.org/cgi-bin/carddisp.pl?gene=PTGS1">https://www.genecards.org/cgi-bin/carddisp.pl?gene=PTGS1</a>   |
| IDS    | Iduronate 2-<br>Sulfatase<br>RNA                           | Protein<br>Coding | 49 | GC0XM149<br>476 | 19.12573 | <a href="https://www.genecards.org/cgi-bin/carddisp.pl?gene=IDS">https://www.genecards.org/cgi-bin/carddisp.pl?gene=IDS</a>       |
| POLR1C | Polymerase I<br>And III Subunit<br>C                       | Protein<br>Coding | 44 | GC06P0554<br>13 | 19.11817 | <a href="https://www.genecards.org/cgi-bin/carddisp.pl?gene=POLR1C">https://www.genecards.org/cgi-bin/carddisp.pl?gene=POLR1C</a> |
| BIRC5  | Baculoviral IAP<br>Repeat<br>Containing 5                  | Protein<br>Coding | 47 | GC17P0782<br>14 | 19.07029 | <a href="https://www.genecards.org/cgi-bin/carddisp.pl?gene=BIRC5">https://www.genecards.org/cgi-bin/carddisp.pl?gene=BIRC5</a>   |
| DLAT   | Dihydrolipoami<br>de S-<br>Acetyltransfera<br>se<br>Cyclin | Protein<br>Coding | 47 | GC11P1120<br>24 | 19.02916 | <a href="https://www.genecards.org/cgi-bin/carddisp.pl?gene=DLAT">https://www.genecards.org/cgi-bin/carddisp.pl?gene=DLAT</a>     |
| CDKN1C | Dependent<br>Kinase Inhibitor<br>1C                        | Protein<br>Coding | 47 | GC11M002<br>894 | 19.02737 | <a href="https://www.genecards.org/cgi-bin/carddisp.pl?gene=CDKN1C">https://www.genecards.org/cgi-bin/carddisp.pl?gene=CDKN1C</a> |

|         |                                                              |                |    |             |          |                                                                                                                                     |
|---------|--------------------------------------------------------------|----------------|----|-------------|----------|-------------------------------------------------------------------------------------------------------------------------------------|
| CLCN1   | Chloride Voltage-Gated Channel 1                             | Protein Coding | 45 | GC07P143316 | 19.02526 | <a href="https://www.genecards.org/cgi-bin/carddisp.pl?gene=CLCN1">https://www.genecards.org/cgi-bin/carddisp.pl?gene=CLCN1</a>     |
| LTF     | Lactotransferrin                                             | Protein Coding | 44 | GC03M046435 | 18.99238 | <a href="https://www.genecards.org/cgi-bin/carddisp.pl?gene=LTF">https://www.genecards.org/cgi-bin/carddisp.pl?gene=LTF</a>         |
| DNAH8   | Dynein Axonemal Heavy Chain 8                                | Protein Coding | 38 | GC06P055369 | 18.96644 | <a href="https://www.genecards.org/cgi-bin/carddisp.pl?gene=DNAH8">https://www.genecards.org/cgi-bin/carddisp.pl?gene=DNAH8</a>     |
| GALK1   | Galactokinase 1                                              | Protein Coding | 48 | GC17M075751 | 18.94658 | <a href="https://www.genecards.org/cgi-bin/carddisp.pl?gene=GALK1">https://www.genecards.org/cgi-bin/carddisp.pl?gene=GALK1</a>     |
| FLAD1   | Flavin Adenine Dinucleotide Synthetase 1                     | Protein Coding | 41 | GC01P154983 | 18.92473 | <a href="https://www.genecards.org/cgi-bin/carddisp.pl?gene=FLAD1">https://www.genecards.org/cgi-bin/carddisp.pl?gene=FLAD1</a>     |
| GNB1    | G Protein Subunit Beta 1                                     | Protein Coding | 47 | GC01M001785 | 18.91256 | <a href="https://www.genecards.org/cgi-bin/carddisp.pl?gene=GNB1">https://www.genecards.org/cgi-bin/carddisp.pl?gene=GNB1</a>       |
| PHOX2B  | Paired Like Homeobox 2B                                      | Protein Coding | 44 | GC04M041746 | 18.90218 | <a href="https://www.genecards.org/cgi-bin/carddisp.pl?gene=PHOX2B">https://www.genecards.org/cgi-bin/carddisp.pl?gene=PHOX2B</a>   |
| SLC22A4 | Solute Carrier Family 22 Member 4                            | Protein Coding | 44 | GC05P132294 | 18.90059 | <a href="https://www.genecards.org/cgi-bin/carddisp.pl?gene=SLC22A4">https://www.genecards.org/cgi-bin/carddisp.pl?gene=SLC22A4</a> |
| AGXT    | Alanine-- Glyoxylate And Serine-- Pyruvate Aminotransferase  | Protein Coding | 46 | GC02P240868 | 18.89698 | <a href="https://www.genecards.org/cgi-bin/carddisp.pl?gene=AGXT">https://www.genecards.org/cgi-bin/carddisp.pl?gene=AGXT</a>       |
| SOST    | Sclerostin                                                   | Protein Coding | 44 | GC17M043753 | 18.88508 | <a href="https://www.genecards.org/cgi-bin/carddisp.pl?gene=SOST">https://www.genecards.org/cgi-bin/carddisp.pl?gene=SOST</a>       |
| GOT2    | Glutamic-Oxaloacetic Transaminase 2                          | Protein Coding | 47 | GC16M058707 | 18.87727 | <a href="https://www.genecards.org/cgi-bin/carddisp.pl?gene=GOT2">https://www.genecards.org/cgi-bin/carddisp.pl?gene=GOT2</a>       |
| HCRT    | Hypocretin Neuropeptide Precursor                            | Protein Coding | 41 | GC17M042185 | 18.87497 | <a href="https://www.genecards.org/cgi-bin/carddisp.pl?gene=HCRT">https://www.genecards.org/cgi-bin/carddisp.pl?gene=HCRT</a>       |
| TALDO1  | Transaldolase 1                                              | Protein Coding | 47 | GC11P000775 | 18.86015 | <a href="https://www.genecards.org/cgi-bin/carddisp.pl?gene=TALDO1">https://www.genecards.org/cgi-bin/carddisp.pl?gene=TALDO1</a>   |
| RARA    | Retinoic Acid Receptor Alpha                                 | Protein Coding | 51 | GC17P040309 | 18.84603 | <a href="https://www.genecards.org/cgi-bin/carddisp.pl?gene=RARA">https://www.genecards.org/cgi-bin/carddisp.pl?gene=RARA</a>       |
| AGER    | Advanced Glycosylation End-Product Specific Receptor Nuclear | Protein Coding | 45 | GC06M032180 | 18.83654 | <a href="https://www.genecards.org/cgi-bin/carddisp.pl?gene=AGER">https://www.genecards.org/cgi-bin/carddisp.pl?gene=AGER</a>       |
| NSD1    | Receptor Binding SET Domain Protein 1                        | Protein Coding | 44 | GC05P177134 | 18.8358  | <a href="https://www.genecards.org/cgi-bin/carddisp.pl?gene=NSD1">https://www.genecards.org/cgi-bin/carddisp.pl?gene=NSD1</a>       |
| FMR1    | FMRP Translational Regulator 1                               | Protein Coding | 45 | GC0XP147925 | 18.83535 | <a href="https://www.genecards.org/cgi-bin/carddisp.pl?gene=FMR1">https://www.genecards.org/cgi-bin/carddisp.pl?gene=FMR1</a>       |
| GAL     | Galanin And GMAP Prepropeptide                               | Protein Coding | 45 | GC11P068684 | 18.82381 | <a href="https://www.genecards.org/cgi-bin/carddisp.pl?gene=GAL">https://www.genecards.org/cgi-bin/carddisp.pl?gene=GAL</a>         |



|          |                                                          |                |    |             |          |                                                                                                                                       |
|----------|----------------------------------------------------------|----------------|----|-------------|----------|---------------------------------------------------------------------------------------------------------------------------------------|
| C19orf12 | Chromosome 19 Open Reading Frame 12                      | Protein Coding | 37 | GC19M029699 | 18.81699 | <a href="https://www.genecards.org/cgi-bin/carddisp.pl?gene=C19orf12">https://www.genecards.org/cgi-bin/carddisp.pl?gene=C19orf12</a> |
| GPX1     | Glutathione Peroxidase 1                                 | Protein Coding | 48 | GC03M049486 | 18.81093 | <a href="https://www.genecards.org/cgi-bin/carddisp.pl?gene=GPX1">https://www.genecards.org/cgi-bin/carddisp.pl?gene=GPX1</a>         |
| B9D2     | B9 Domain Containing 2                                   | Protein Coding | 40 | GC19M041354 | 18.80832 | <a href="https://www.genecards.org/cgi-bin/carddisp.pl?gene=B9D2">https://www.genecards.org/cgi-bin/carddisp.pl?gene=B9D2</a>         |
| LMNB1    | Lamin B1                                                 | Protein Coding | 48 | GC05P126776 | 18.80138 | <a href="https://www.genecards.org/cgi-bin/carddisp.pl?gene=LMNB1">https://www.genecards.org/cgi-bin/carddisp.pl?gene=LMNB1</a>       |
| AGK      | Acylglycerol Kinase                                      | Protein Coding | 43 | GC07P141551 | 18.77034 | <a href="https://www.genecards.org/cgi-bin/carddisp.pl?gene=AGK">https://www.genecards.org/cgi-bin/carddisp.pl?gene=AGK</a>           |
| MIR151A  | MicroRNA 151a                                            | RNA Gene       | 18 | GC08M140733 | 18.76171 | <a href="https://www.genecards.org/cgi-bin/carddisp.pl?gene=MIR151A">https://www.genecards.org/cgi-bin/carddisp.pl?gene=MIR151A</a>   |
| TEK      | TEK Receptor Tyrosine Kinase                             | Protein Coding | 51 | GC09P027109 | 18.74609 | <a href="https://www.genecards.org/cgi-bin/carddisp.pl?gene=TEK">https://www.genecards.org/cgi-bin/carddisp.pl?gene=TEK</a>           |
| FTH1     | Ferritin Heavy Chain 1                                   | Protein Coding | 51 | GC11M061959 | 18.7335  | <a href="https://www.genecards.org/cgi-bin/carddisp.pl?gene=FTH1">https://www.genecards.org/cgi-bin/carddisp.pl?gene=FTH1</a>         |
| HSD11B1  | 11-Beta Hydroxysteroid Dehydrogenase 1                   | Protein Coding | 50 | GC01P209686 | 18.72218 | <a href="https://www.genecards.org/cgi-bin/carddisp.pl?gene=HSD11B1">https://www.genecards.org/cgi-bin/carddisp.pl?gene=HSD11B1</a>   |
| NDUFAF2  | NADH:Ubiquinone Oxidoreductase Complex Assembly Factor 2 | Protein Coding | 41 | GC05P060945 | 18.71305 | <a href="https://www.genecards.org/cgi-bin/carddisp.pl?gene=NDUFAF2">https://www.genecards.org/cgi-bin/carddisp.pl?gene=NDUFAF2</a>   |
| CFTR-AS1 | CFTR Antisense RNA 1                                     | RNA Gene       | 10 | GC07M117561 | 18.71105 | <a href="https://www.genecards.org/cgi-bin/carddisp.pl?gene=CFTR-AS1">https://www.genecards.org/cgi-bin/carddisp.pl?gene=CFTR-AS1</a> |
| EPHX2    | Epoxide Hydrolase 2                                      | Protein Coding | 48 | GC08P027490 | 18.69537 | <a href="https://www.genecards.org/cgi-bin/carddisp.pl?gene=EPHX2">https://www.genecards.org/cgi-bin/carddisp.pl?gene=EPHX2</a>       |
| ESR2     | Estrogen Receptor 2                                      | Protein Coding | 50 | GC14M064084 | 18.67936 | <a href="https://www.genecards.org/cgi-bin/carddisp.pl?gene=ESR2">https://www.genecards.org/cgi-bin/carddisp.pl?gene=ESR2</a>         |
| XRCC1    | X-Ray Repair Cross Complementing 1                       | Protein Coding | 44 | GC19M043543 | 18.67051 | <a href="https://www.genecards.org/cgi-bin/carddisp.pl?gene=XRCC1">https://www.genecards.org/cgi-bin/carddisp.pl?gene=XRCC1</a>       |
| GALE     | UDP-Galactose-4-Epimerase                                | Protein Coding | 45 | GC01M023795 | 18.66944 | <a href="https://www.genecards.org/cgi-bin/carddisp.pl?gene=GALE">https://www.genecards.org/cgi-bin/carddisp.pl?gene=GALE</a>         |
| SMC1A    | Structural Maintenance Of Chromosomes 1A                 | Protein Coding | 47 | GC0XM053374 | 18.66214 | <a href="https://www.genecards.org/cgi-bin/carddisp.pl?gene=SMC1A">https://www.genecards.org/cgi-bin/carddisp.pl?gene=SMC1A</a>       |
| SAA1     | Serum Amyloid A1                                         | Protein Coding | 43 | GC11P018267 | 18.66112 | <a href="https://www.genecards.org/cgi-bin/carddisp.pl?gene=SAA1">https://www.genecards.org/cgi-bin/carddisp.pl?gene=SAA1</a>         |
| NRG1     | Neuregulin 1                                             | Protein Coding | 47 | GC08P031639 | 18.65294 | <a href="https://www.genecards.org/cgi-bin/carddisp.pl?gene=NRG1">https://www.genecards.org/cgi-bin/carddisp.pl?gene=NRG1</a>         |
| ZMPSTE24 | Zinc Metalloproteinase STE24                             | Protein Coding | 43 | GC01P040258 | 18.63879 | <a href="https://www.genecards.org/cgi-bin/carddisp.pl?gene=ZMPSTE24">https://www.genecards.org/cgi-bin/carddisp.pl?gene=ZMPSTE24</a> |
| CFHR5    | Complement Factor H Related 5                            | Protein Coding | 40 | GC01P196977 | 18.63254 | <a href="https://www.genecards.org/cgi-bin/carddisp.pl?gene=CFHR5">https://www.genecards.org/cgi-bin/carddisp.pl?gene=CFHR5</a>       |

|         |                                                   |                |    |             |          |                                                                                                                                     |
|---------|---------------------------------------------------|----------------|----|-------------|----------|-------------------------------------------------------------------------------------------------------------------------------------|
| SCN9A   | Sodium Voltage-Gated Channel Alpha Subunit 9      | Protein Coding | 48 | GC02M166195 | 18.63041 | <a href="https://www.genecards.org/cgi-bin/carddisp.pl?gene=SCN9A">https://www.genecards.org/cgi-bin/carddisp.pl?gene=SCN9A</a>     |
| MIR98   | MicroRNA 98                                       | RNA Gene       | 17 | GC0XM053595 | 18.60065 | <a href="https://www.genecards.org/cgi-bin/carddisp.pl?gene=MIR98">https://www.genecards.org/cgi-bin/carddisp.pl?gene=MIR98</a>     |
| MIR373  | MicroRNA 373                                      | RNA Gene       | 20 | GC19P056408 | 18.59049 | <a href="https://www.genecards.org/cgi-bin/carddisp.pl?gene=MIR373">https://www.genecards.org/cgi-bin/carddisp.pl?gene=MIR373</a>   |
| HMGB1   | High Mobility Group Box 1                         | Protein Coding | 45 | GC13M030456 | 18.58014 | <a href="https://www.genecards.org/cgi-bin/carddisp.pl?gene=HMGB1">https://www.genecards.org/cgi-bin/carddisp.pl?gene=HMGB1</a>     |
| FGFR4   | Fibroblast Growth Factor Receptor 4               | Protein Coding | 52 | GC05P177086 | 18.52946 | <a href="https://www.genecards.org/cgi-bin/carddisp.pl?gene=FGFR4">https://www.genecards.org/cgi-bin/carddisp.pl?gene=FGFR4</a>     |
| DNAJC13 | DnaJ Heat Shock Protein Family (Hsp40) Member C13 | Protein Coding | 38 | GC03P132417 | 18.52785 | <a href="https://www.genecards.org/cgi-bin/carddisp.pl?gene=DNAJC13">https://www.genecards.org/cgi-bin/carddisp.pl?gene=DNAJC13</a> |
| NDUFA1  | NADH:Ubiquinone Oxidoreductase Subunit A1         | Protein Coding | 45 | GC0XP119871 | 18.52526 | <a href="https://www.genecards.org/cgi-bin/carddisp.pl?gene=NDUFA1">https://www.genecards.org/cgi-bin/carddisp.pl?gene=NDUFA1</a>   |
| CRHR1   | Corticotropin Releasing Hormone Receptor 1        | Protein Coding | 46 | GC17P045784 | 18.52266 | <a href="https://www.genecards.org/cgi-bin/carddisp.pl?gene=CRHR1">https://www.genecards.org/cgi-bin/carddisp.pl?gene=CRHR1</a>     |
| CTRC    | Chymotrypsin C                                    | Protein Coding | 44 | GC01P015438 | 18.50513 | <a href="https://www.genecards.org/cgi-bin/carddisp.pl?gene=CTRC">https://www.genecards.org/cgi-bin/carddisp.pl?gene=CTRC</a>       |
| REST    | RE1 Silencing Transcription Factor                | Protein Coding | 45 | GC04P056907 | 18.49587 | <a href="https://www.genecards.org/cgi-bin/carddisp.pl?gene=REST">https://www.genecards.org/cgi-bin/carddisp.pl?gene=REST</a>       |
| PITX2   | Paired Like Homeodomain 2                         | Protein Coding | 48 | GC04M110617 | 18.4945  | <a href="https://www.genecards.org/cgi-bin/carddisp.pl?gene=PITX2">https://www.genecards.org/cgi-bin/carddisp.pl?gene=PITX2</a>     |
| MAPK10  | Mitogen-Activated Protein Kinase 10               | Protein Coding | 52 | GC04M085990 | 18.47836 | <a href="https://www.genecards.org/cgi-bin/carddisp.pl?gene=MAPK10">https://www.genecards.org/cgi-bin/carddisp.pl?gene=MAPK10</a>   |
| GAD1    | Glutamate Decarboxylase 1                         | Protein Coding | 52 | GC02P170813 | 18.4657  | <a href="https://www.genecards.org/cgi-bin/carddisp.pl?gene=GAD1">https://www.genecards.org/cgi-bin/carddisp.pl?gene=GAD1</a>       |
| WNT1    | Wnt Family Member 1                               | Protein Coding | 46 | GC12P049053 | 18.45898 | <a href="https://www.genecards.org/cgi-bin/carddisp.pl?gene=WNT1">https://www.genecards.org/cgi-bin/carddisp.pl?gene=WNT1</a>       |
| CDK2    | Cyclin Dependent Kinase 2                         | Protein Coding | 52 | GC12P055966 | 18.4469  | <a href="https://www.genecards.org/cgi-bin/carddisp.pl?gene=CDK2">https://www.genecards.org/cgi-bin/carddisp.pl?gene=CDK2</a>       |
| MYLK    | Myosin Light Chain Kinase                         | Protein Coding | 53 | GC03M123610 | 18.44142 | <a href="https://www.genecards.org/cgi-bin/carddisp.pl?gene=MYLK">https://www.genecards.org/cgi-bin/carddisp.pl?gene=MYLK</a>       |
| BTD     | Biotinidase                                       | Protein Coding | 45 | GC03P015967 | 18.43469 | <a href="https://www.genecards.org/cgi-bin/carddisp.pl?gene=BTD">https://www.genecards.org/cgi-bin/carddisp.pl?gene=BTD</a>         |
| NPC1L1  | NPC1 Like Intracellular Cholesterol Transporter 1 | Protein Coding | 44 | GC07M044512 | 18.41949 | <a href="https://www.genecards.org/cgi-bin/carddisp.pl?gene=NPC1L1">https://www.genecards.org/cgi-bin/carddisp.pl?gene=NPC1L1</a>   |
| S100A9  | S100 Calcium Binding Protein A9                   | Protein Coding | 43 | GC01P153357 | 18.40723 | <a href="https://www.genecards.org/cgi-bin/carddisp.pl?gene=S100A9">https://www.genecards.org/cgi-bin/carddisp.pl?gene=S100A9</a>   |

|         |                                                                            |                |    |             |          |                                                                                                                                     |
|---------|----------------------------------------------------------------------------|----------------|----|-------------|----------|-------------------------------------------------------------------------------------------------------------------------------------|
| CIITA   | Class II Major Histocompatibility Complex Transactivator SHH Signaling And | Protein Coding | 45 | GC16P010879 | 18.406   | <a href="https://www.genecards.org/cgi-bin/carddisp.pl?gene=CIITA">https://www.genecards.org/cgi-bin/carddisp.pl?gene=CIITA</a>     |
| SDCCAG8 | Ciliogenesis Regulator SDCCAG8 CEA Cell                                    | Protein Coding | 43 | GC01P243255 | 18.3744  | <a href="https://www.genecards.org/cgi-bin/carddisp.pl?gene=SDCCAG8">https://www.genecards.org/cgi-bin/carddisp.pl?gene=SDCCAG8</a> |
| CEACAM5 | Adhesion Molecule 5                                                        | Protein Coding | 42 | GC19P041709 | 18.37294 | <a href="https://www.genecards.org/cgi-bin/carddisp.pl?gene=CEACAM5">https://www.genecards.org/cgi-bin/carddisp.pl?gene=CEACAM5</a> |
| IL3     | Interleukin 3                                                              | Protein Coding | 44 | GC05P132060 | 18.36293 | <a href="https://www.genecards.org/cgi-bin/carddisp.pl?gene=IL3">https://www.genecards.org/cgi-bin/carddisp.pl?gene=IL3</a>         |
| ANGPT2  | Angiopoietin 2                                                             | Protein Coding | 46 | GC08M006499 | 18.36282 | <a href="https://www.genecards.org/cgi-bin/carddisp.pl?gene=ANGPT2">https://www.genecards.org/cgi-bin/carddisp.pl?gene=ANGPT2</a>   |
| MIR214  | MicroRNA 214                                                               | RNA Gene       | 20 | GC01M172234 | 18.35883 | <a href="https://www.genecards.org/cgi-bin/carddisp.pl?gene=MIR214">https://www.genecards.org/cgi-bin/carddisp.pl?gene=MIR214</a>   |
| LRRC56  | Leucine Rich Repeat Containing 56                                          | Protein Coding | 36 | GC11P000518 | 18.32882 | <a href="https://www.genecards.org/cgi-bin/carddisp.pl?gene=LRRC56">https://www.genecards.org/cgi-bin/carddisp.pl?gene=LRRC56</a>   |
| MIR30D  | MicroRNA 30d                                                               | RNA Gene       | 17 | GC08M134804 | 18.32839 | <a href="https://www.genecards.org/cgi-bin/carddisp.pl?gene=MIR30D">https://www.genecards.org/cgi-bin/carddisp.pl?gene=MIR30D</a>   |
| MMP13   | Matrix Metalloproteinase 13                                                | Protein Coding | 51 | GC11M102942 | 18.32537 | <a href="https://www.genecards.org/cgi-bin/carddisp.pl?gene=MMP13">https://www.genecards.org/cgi-bin/carddisp.pl?gene=MMP13</a>     |
| RAD51C  | RAD51 Paralog C                                                            | Protein Coding | 44 | GC17P058692 | 18.31807 | <a href="https://www.genecards.org/cgi-bin/carddisp.pl?gene=RAD51C">https://www.genecards.org/cgi-bin/carddisp.pl?gene=RAD51C</a>   |
| GAST    | Gastrin                                                                    | Protein Coding | 40 | GC17P041712 | 18.31575 | <a href="https://www.genecards.org/cgi-bin/carddisp.pl?gene=GAST">https://www.genecards.org/cgi-bin/carddisp.pl?gene=GAST</a>       |
| RELN    | Reelin                                                                     | Protein Coding | 44 | GC07M103471 | 18.31478 | <a href="https://www.genecards.org/cgi-bin/carddisp.pl?gene=RELN">https://www.genecards.org/cgi-bin/carddisp.pl?gene=RELN</a>       |
| SETX    | Senataxin                                                                  | Protein Coding | 41 | GC09M132261 | 18.29539 | <a href="https://www.genecards.org/cgi-bin/carddisp.pl?gene=SETX">https://www.genecards.org/cgi-bin/carddisp.pl?gene=SETX</a>       |
| SMN2    | Survival Of Motor Neuron 2, Centromeric                                    | Protein Coding | 43 | GC05P070049 | 18.29088 | <a href="https://www.genecards.org/cgi-bin/carddisp.pl?gene=SMN2">https://www.genecards.org/cgi-bin/carddisp.pl?gene=SMN2</a>       |
| NGLY1   | N-Glycanase 1                                                              | Protein Coding | 45 | GC03M025718 | 18.28975 | <a href="https://www.genecards.org/cgi-bin/carddisp.pl?gene=NGLY1">https://www.genecards.org/cgi-bin/carddisp.pl?gene=NGLY1</a>     |
| IRF1    | Interferon Regulatory Factor 1                                             | Protein Coding | 47 | GC05M132440 | 18.28387 | <a href="https://www.genecards.org/cgi-bin/carddisp.pl?gene=IRF1">https://www.genecards.org/cgi-bin/carddisp.pl?gene=IRF1</a>       |
| AARS2   | Alanyl-TRNA Synthetase 2, Mitochondrial                                    | Protein Coding | 43 | GC06M044297 | 18.27469 | <a href="https://www.genecards.org/cgi-bin/carddisp.pl?gene=AARS2">https://www.genecards.org/cgi-bin/carddisp.pl?gene=AARS2</a>     |
| C4B     | Complement C4B (Chido Blood Group)                                         | Protein Coding | 44 | GC06P032014 | 18.26848 | <a href="https://www.genecards.org/cgi-bin/carddisp.pl?gene=C4B">https://www.genecards.org/cgi-bin/carddisp.pl?gene=C4B</a>         |
| GLI3    | GLI Family Zinc Finger 3                                                   | Protein Coding | 50 | GC07M041960 | 18.24593 | <a href="https://www.genecards.org/cgi-bin/carddisp.pl?gene=GLI3">https://www.genecards.org/cgi-bin/carddisp.pl?gene=GLI3</a>       |
| CACNA1S | Calcium Voltage-Gated Channel Subunit Alpha1S                              | Protein Coding | 49 | GC01M201008 | 18.2353  | <a href="https://www.genecards.org/cgi-bin/carddisp.pl?gene=CACNA1S">https://www.genecards.org/cgi-bin/carddisp.pl?gene=CACNA1S</a> |

|         |                                                                                                         |                |    |             |          |                                                                                                                                     |
|---------|---------------------------------------------------------------------------------------------------------|----------------|----|-------------|----------|-------------------------------------------------------------------------------------------------------------------------------------|
| CHCHD10 | Coiled-Coil-Helix-Coiled-Coil-Helix Domain Containing 10 Calcium Voltage-Gated Channel Subunit Alpha1 F | Protein Coding | 40 | GC22M023765 | 18.2297  | <a href="https://www.genecards.org/cgi-bin/carddisp.pl?gene=CHCHD10">https://www.genecards.org/cgi-bin/carddisp.pl?gene=CHCHD10</a> |
| CACNA1F | Voltage-Gated Channel Subunit Alpha1 F                                                                  | Protein Coding | 45 | GC0XM049205 | 18.22608 | <a href="https://www.genecards.org/cgi-bin/carddisp.pl?gene=CACNA1F">https://www.genecards.org/cgi-bin/carddisp.pl?gene=CACNA1F</a> |
| SKIV2L  | Ski2 Like RNA Helicase                                                                                  | Protein Coding | 44 | GC06P055223 | 18.22394 | <a href="https://www.genecards.org/cgi-bin/carddisp.pl?gene=SKIV2L">https://www.genecards.org/cgi-bin/carddisp.pl?gene=SKIV2L</a>   |
| STXBP1  | Syntaxin Binding Protein 1                                                                              | Protein Coding | 49 | GC09P127582 | 18.22083 | <a href="https://www.genecards.org/cgi-bin/carddisp.pl?gene=STXBP1">https://www.genecards.org/cgi-bin/carddisp.pl?gene=STXBP1</a>   |
| KHK     | Ketohexokinase                                                                                          | Protein Coding | 45 | GC02P027086 | 18.21322 | <a href="https://www.genecards.org/cgi-bin/carddisp.pl?gene=KHK">https://www.genecards.org/cgi-bin/carddisp.pl?gene=KHK</a>         |
| NOS1    | Nitric Oxide Synthase 1                                                                                 | Protein Coding | 50 | GC12M117208 | 18.19965 | <a href="https://www.genecards.org/cgi-bin/carddisp.pl?gene=NOS1">https://www.genecards.org/cgi-bin/carddisp.pl?gene=NOS1</a>       |
| BTK     | Bruton Tyrosine Kinase                                                                                  | Protein Coding | 54 | GC0XM101349 | 18.19194 | <a href="https://www.genecards.org/cgi-bin/carddisp.pl?gene=BTK">https://www.genecards.org/cgi-bin/carddisp.pl?gene=BTK</a>         |
| SIRT3   | Sirtuin 3                                                                                               | Protein Coding | 48 | GC11M000215 | 18.18283 | <a href="https://www.genecards.org/cgi-bin/carddisp.pl?gene=SIRT3">https://www.genecards.org/cgi-bin/carddisp.pl?gene=SIRT3</a>     |
| MIR96   | MicroRNA 96                                                                                             | RNA Gene       | 20 | GC07M129774 | 18.18232 | <a href="https://www.genecards.org/cgi-bin/carddisp.pl?gene=MIR96">https://www.genecards.org/cgi-bin/carddisp.pl?gene=MIR96</a>     |
| WDR45   | WD Repeat Domain 45                                                                                     | Protein Coding | 41 | GC0XM049074 | 18.17897 | <a href="https://www.genecards.org/cgi-bin/carddisp.pl?gene=WDR45">https://www.genecards.org/cgi-bin/carddisp.pl?gene=WDR45</a>     |
| CD27    | CD27 Molecule                                                                                           | Protein Coding | 45 | GC12P011824 | 18.15331 | <a href="https://www.genecards.org/cgi-bin/carddisp.pl?gene=CD27">https://www.genecards.org/cgi-bin/carddisp.pl?gene=CD27</a>       |
| AKR1C4  | Aldo-Keto Reductase Family 1 Member C4                                                                  | Protein Coding | 48 | GC10P005195 | 18.15305 | <a href="https://www.genecards.org/cgi-bin/carddisp.pl?gene=AKR1C4">https://www.genecards.org/cgi-bin/carddisp.pl?gene=AKR1C4</a>   |
| CLDN1   | Claudin 1                                                                                               | Protein Coding | 48 | GC03M190305 | 18.14766 | <a href="https://www.genecards.org/cgi-bin/carddisp.pl?gene=CLDN1">https://www.genecards.org/cgi-bin/carddisp.pl?gene=CLDN1</a>     |
| AHR     | Aryl Hydrocarbon Receptor                                                                               | Protein Coding | 49 | GC07P016916 | 18.14008 | <a href="https://www.genecards.org/cgi-bin/carddisp.pl?gene=AHR">https://www.genecards.org/cgi-bin/carddisp.pl?gene=AHR</a>         |
| PLCB1   | Phospholipase C Beta 1                                                                                  | Protein Coding | 49 | GC20P008061 | 18.10563 | <a href="https://www.genecards.org/cgi-bin/carddisp.pl?gene=PLCB1">https://www.genecards.org/cgi-bin/carddisp.pl?gene=PLCB1</a>     |
| PPOX    | Protoporphyrinogen Oxidase                                                                              | Protein Coding | 44 | GC01P161184 | 18.09037 | <a href="https://www.genecards.org/cgi-bin/carddisp.pl?gene=PPOX">https://www.genecards.org/cgi-bin/carddisp.pl?gene=PPOX</a>       |
| UCP1    | Uncoupling Protein 1                                                                                    | Protein Coding | 45 | GC04M140559 | 18.08976 | <a href="https://www.genecards.org/cgi-bin/carddisp.pl?gene=UCP1">https://www.genecards.org/cgi-bin/carddisp.pl?gene=UCP1</a>       |
| HTR1A   | 5-Hydroxytryptamine Receptor 1A                                                                         | Protein Coding | 48 | GC05M063960 | 18.08189 | <a href="https://www.genecards.org/cgi-bin/carddisp.pl?gene=HTR1A">https://www.genecards.org/cgi-bin/carddisp.pl?gene=HTR1A</a>     |
| ADK     | Adenosine Kinase ADP                                                                                    | Protein Coding | 52 | GC10P074152 | 18.07587 | <a href="https://www.genecards.org/cgi-bin/carddisp.pl?gene=ADK">https://www.genecards.org/cgi-bin/carddisp.pl?gene=ADK</a>         |
| ARL13B  | Ribosylation Factor Like GTPase 13B                                                                     | Protein Coding | 38 | GC03P093980 | 18.07421 | <a href="https://www.genecards.org/cgi-bin/carddisp.pl?gene=ARL13B">https://www.genecards.org/cgi-bin/carddisp.pl?gene=ARL13B</a>   |
| TMPRSS6 | Transmembrane Serine Protease 6                                                                         | Protein Coding | 44 | GC22M037066 | 18.06333 | <a href="https://www.genecards.org/cgi-bin/carddisp.pl?gene=TMPRSS6">https://www.genecards.org/cgi-bin/carddisp.pl?gene=TMPRSS6</a> |

|         |                                                                        |                |    |             |          |                                                                                                                                     |
|---------|------------------------------------------------------------------------|----------------|----|-------------|----------|-------------------------------------------------------------------------------------------------------------------------------------|
| IKZF1   | IKAROS Family Zinc Finger 1                                            | Protein Coding | 48 | GC07P050303 | 18.0478  | <a href="https://www.genecards.org/cgi-bin/carddisp.pl?gene=IKZF1">https://www.genecards.org/cgi-bin/carddisp.pl?gene=IKZF1</a>     |
| VIP     | Vasoactive Intestinal Peptide                                          | Protein Coding | 45 | GC06P152750 | 18.04681 | <a href="https://www.genecards.org/cgi-bin/carddisp.pl?gene=VIP">https://www.genecards.org/cgi-bin/carddisp.pl?gene=VIP</a>         |
| CD274   | CD274 Molecule                                                         | Protein Coding | 45 | GC09P005450 | 18.04519 | <a href="https://www.genecards.org/cgi-bin/carddisp.pl?gene=CD274">https://www.genecards.org/cgi-bin/carddisp.pl?gene=CD274</a>     |
| ANO10   | Anoctamin 10                                                           | Protein Coding | 41 | GC03M043355 | 18.04361 | <a href="https://www.genecards.org/cgi-bin/carddisp.pl?gene=ANO10">https://www.genecards.org/cgi-bin/carddisp.pl?gene=ANO10</a>     |
| SMAD2   | SMAD Family Member 2                                                   | Protein Coding | 48 | GC18M047809 | 18.0278  | <a href="https://www.genecards.org/cgi-bin/carddisp.pl?gene=SMAD2">https://www.genecards.org/cgi-bin/carddisp.pl?gene=SMAD2</a>     |
| GRK1    | G Protein-Coupled Receptor Kinase 1                                    | Protein Coding | 43 | GC13P113645 | 18.01824 | <a href="https://www.genecards.org/cgi-bin/carddisp.pl?gene=GRK1">https://www.genecards.org/cgi-bin/carddisp.pl?gene=GRK1</a>       |
| NDUFA13 | NADH:Ubiquinone Oxidoreductase Subunit A13                             | Protein Coding | 45 | GC19P019515 | 18.01547 | <a href="https://www.genecards.org/cgi-bin/carddisp.pl?gene=NDUFA13">https://www.genecards.org/cgi-bin/carddisp.pl?gene=NDUFA13</a> |
| ITGAL   | Integrin Subunit Alpha L                                               | Protein Coding | 47 | GC16P030472 | 18.00021 | <a href="https://www.genecards.org/cgi-bin/carddisp.pl?gene=ITGAL">https://www.genecards.org/cgi-bin/carddisp.pl?gene=ITGAL</a>     |
| MIR150  | MicroRNA 150                                                           | RNA Gene       | 22 | GC19M049500 | 17.99328 | <a href="https://www.genecards.org/cgi-bin/carddisp.pl?gene=MIR150">https://www.genecards.org/cgi-bin/carddisp.pl?gene=MIR150</a>   |
| FKTN    | Fukutin                                                                | Protein Coding | 40 | GC09P105558 | 17.9832  | <a href="https://www.genecards.org/cgi-bin/carddisp.pl?gene=FKTN">https://www.genecards.org/cgi-bin/carddisp.pl?gene=FKTN</a>       |
| SHC1    | SHC Adaptor Protein 1                                                  | Protein Coding | 46 | GC01M154962 | 17.97852 | <a href="https://www.genecards.org/cgi-bin/carddisp.pl?gene=SHC1">https://www.genecards.org/cgi-bin/carddisp.pl?gene=SHC1</a>       |
| FTO     | FTO Alpha-Ketoglutarate Dependent Dioxygenase                          | Protein Coding | 45 | GC16P053737 | 17.97195 | <a href="https://www.genecards.org/cgi-bin/carddisp.pl?gene=FTO">https://www.genecards.org/cgi-bin/carddisp.pl?gene=FTO</a>         |
| HPRT1   | Hypoxanthine Phosphoribosyl transferase 1                              | Protein Coding | 49 | GC0XP134460 | 17.96763 | <a href="https://www.genecards.org/cgi-bin/carddisp.pl?gene=HPRT1">https://www.genecards.org/cgi-bin/carddisp.pl?gene=HPRT1</a>     |
| PODXL   | Podocalyxin Like                                                       | Protein Coding | 43 | GC07M131500 | 17.93267 | <a href="https://www.genecards.org/cgi-bin/carddisp.pl?gene=PODXL">https://www.genecards.org/cgi-bin/carddisp.pl?gene=PODXL</a>     |
| HDAC9   | Histone Deacetylase 9                                                  | Protein Coding | 47 | GC07P018086 | 17.93263 | <a href="https://www.genecards.org/cgi-bin/carddisp.pl?gene=HDAC9">https://www.genecards.org/cgi-bin/carddisp.pl?gene=HDAC9</a>     |
| DPYD    | Dihydropyrimidine Dehydrogenase                                        | Protein Coding | 53 | GC01M097015 | 17.93047 | <a href="https://www.genecards.org/cgi-bin/carddisp.pl?gene=DPYD">https://www.genecards.org/cgi-bin/carddisp.pl?gene=DPYD</a>       |
| PIK3CD  | Phosphatidylinositol-4,5-Bisphosphate 3-Kinase Catalytic Subunit Delta | Protein Coding | 54 | GC01P009629 | 17.92698 | <a href="https://www.genecards.org/cgi-bin/carddisp.pl?gene=PIK3CD">https://www.genecards.org/cgi-bin/carddisp.pl?gene=PIK3CD</a>   |
| ABCA3   | ATP Binding Cassette Subfamily A Member 3                              | Protein Coding | 49 | GC16M002275 | 17.92265 | <a href="https://www.genecards.org/cgi-bin/carddisp.pl?gene=ABCA3">https://www.genecards.org/cgi-bin/carddisp.pl?gene=ABCA3</a>     |
| COL11A1 | Collagen Type XI Alpha 1 Chain                                         | Protein Coding | 43 | GC01M102876 | 17.91344 | <a href="https://www.genecards.org/cgi-bin/carddisp.pl?gene=COL11A1">https://www.genecards.org/cgi-bin/carddisp.pl?gene=COL11A1</a> |
| PTH     | Parathyroid Hormone                                                    | Protein Coding | 47 | GC11M013492 | 17.90086 | <a href="https://www.genecards.org/cgi-bin/carddisp.pl?gene=PTH">https://www.genecards.org/cgi-bin/carddisp.pl?gene=PTH</a>         |

|         |                                                                  |                |    |             |          |                                                                                                                                     |
|---------|------------------------------------------------------------------|----------------|----|-------------|----------|-------------------------------------------------------------------------------------------------------------------------------------|
| NR3C2   | Nuclear Receptor Subfamily 3 Group C Member 2                    | Protein Coding | 48 | GC04M148078 | 17.8857  | <a href="https://www.genecards.org/cgi-bin/carddisp.pl?gene=NR3C2">https://www.genecards.org/cgi-bin/carddisp.pl?gene=NR3C2</a>     |
| MMP7    | Matrix Metalloproteinase 7                                       | Protein Coding | 49 | GC11M102425 | 17.88334 | <a href="https://www.genecards.org/cgi-bin/carddisp.pl?gene=MMP7">https://www.genecards.org/cgi-bin/carddisp.pl?gene=MMP7</a>       |
| MITF    | Melanocyte Inducing Transcription Factor                         | Protein Coding | 48 | GC03P069788 | 17.84032 | <a href="https://www.genecards.org/cgi-bin/carddisp.pl?gene=MITF">https://www.genecards.org/cgi-bin/carddisp.pl?gene=MITF</a>       |
| ADRB3   | Adrenoceptor Beta 3                                              | Protein Coding | 46 | GC08M037962 | 17.83694 | <a href="https://www.genecards.org/cgi-bin/carddisp.pl?gene=ADRB3">https://www.genecards.org/cgi-bin/carddisp.pl?gene=ADRB3</a>     |
| PSTPIP1 | Proline-Serine-Threonine Phosphatase Interacting Protein 1       | Protein Coding | 46 | GC15P076993 | 17.8344  | <a href="https://www.genecards.org/cgi-bin/carddisp.pl?gene=PSTPIP1">https://www.genecards.org/cgi-bin/carddisp.pl?gene=PSTPIP1</a> |
| CYP17A1 | Cytochrome P450 Family 17 Subfamily A Member 1                   | Protein Coding | 50 | GC10M102830 | 17.82563 | <a href="https://www.genecards.org/cgi-bin/carddisp.pl?gene=CYP17A1">https://www.genecards.org/cgi-bin/carddisp.pl?gene=CYP17A1</a> |
| HTR3A   | 5-Hydroxytryptamine Receptor 3A                                  | Protein Coding | 47 | GC11P113974 | 17.82027 | <a href="https://www.genecards.org/cgi-bin/carddisp.pl?gene=HTR3A">https://www.genecards.org/cgi-bin/carddisp.pl?gene=HTR3A</a>     |
| DDX3X   | DEAD-Box Helicase 3 X-Linked                                     | Protein Coding | 48 | GC0XP041333 | 17.81497 | <a href="https://www.genecards.org/cgi-bin/carddisp.pl?gene=DDX3X">https://www.genecards.org/cgi-bin/carddisp.pl?gene=DDX3X</a>     |
| DNMT3B  | DNA Methyltransferase 3 Beta                                     | Protein Coding | 51 | GC20P032762 | 17.81486 | <a href="https://www.genecards.org/cgi-bin/carddisp.pl?gene=DNMT3B">https://www.genecards.org/cgi-bin/carddisp.pl?gene=DNMT3B</a>   |
| HK1     | Hexokinase 1                                                     | Protein Coding | 51 | GC10P069269 | 17.80375 | <a href="https://www.genecards.org/cgi-bin/carddisp.pl?gene=HK1">https://www.genecards.org/cgi-bin/carddisp.pl?gene=HK1</a>         |
| UGT1A5  | UDP Glucuronosyltransferase Family 1 Member A5                   | Protein Coding | 34 | GC02P233712 | 17.79956 | <a href="https://www.genecards.org/cgi-bin/carddisp.pl?gene=UGT1A5">https://www.genecards.org/cgi-bin/carddisp.pl?gene=UGT1A5</a>   |
| TRPV1   | Transient Receptor Potential Cation Channel Subfamily V Member 1 | Protein Coding | 47 | GC17M003565 | 17.78683 | <a href="https://www.genecards.org/cgi-bin/carddisp.pl?gene=TRPV1">https://www.genecards.org/cgi-bin/carddisp.pl?gene=TRPV1</a>     |
| SI      | Sucrase-Isomaltase                                               | Protein Coding | 44 | GC03M164978 | 17.77207 | <a href="https://www.genecards.org/cgi-bin/carddisp.pl?gene=SI">https://www.genecards.org/cgi-bin/carddisp.pl?gene=SI</a>           |
| LACC1   | Laccase Domain Containing 1                                      | Protein Coding | 35 | GC13P043879 | 17.77165 | <a href="https://www.genecards.org/cgi-bin/carddisp.pl?gene=LACC1">https://www.genecards.org/cgi-bin/carddisp.pl?gene=LACC1</a>     |
| BACE1   | Beta-Secretase 1                                                 | Protein Coding | 47 | GC11M117285 | 17.76959 | <a href="https://www.genecards.org/cgi-bin/carddisp.pl?gene=BACE1">https://www.genecards.org/cgi-bin/carddisp.pl?gene=BACE1</a>     |
| GNB3    | G Protein Subunit Beta 3                                         | Protein Coding | 48 | GC12P006839 | 17.76518 | <a href="https://www.genecards.org/cgi-bin/carddisp.pl?gene=GNB3">https://www.genecards.org/cgi-bin/carddisp.pl?gene=GNB3</a>       |

|          |                                              |                |    |             |          |                                                                                                                                       |
|----------|----------------------------------------------|----------------|----|-------------|----------|---------------------------------------------------------------------------------------------------------------------------------------|
| ETV6     | ETS Variant Transcription Factor 6           | Protein Coding | 47 | GC12P011649 | 17.73456 | <a href="https://www.genecards.org/cgi-bin/carddisp.pl?gene=ETV6">https://www.genecards.org/cgi-bin/carddisp.pl?gene=ETV6</a>         |
| SGPL1    | Sphingosine-1-Phosphate Lyase 1              | Protein Coding | 45 | GC10P070815 | 17.73369 | <a href="https://www.genecards.org/cgi-bin/carddisp.pl?gene=SGPL1">https://www.genecards.org/cgi-bin/carddisp.pl?gene=SGPL1</a>       |
| ABCC3    | ATP Binding Cassette Subfamily C Member 3    | Protein Coding | 47 | GC17P050634 | 17.72028 | <a href="https://www.genecards.org/cgi-bin/carddisp.pl?gene=ABCC3">https://www.genecards.org/cgi-bin/carddisp.pl?gene=ABCC3</a>       |
| SLC25A15 | Solute Carrier Family 25 Member 15           | Protein Coding | 44 | GC13P040789 | 17.70816 | <a href="https://www.genecards.org/cgi-bin/carddisp.pl?gene=SLC25A15">https://www.genecards.org/cgi-bin/carddisp.pl?gene=SLC25A15</a> |
| LBP      | Lipopolysaccharide Binding Protein           | Protein Coding | 44 | GC20P038346 | 17.69856 | <a href="https://www.genecards.org/cgi-bin/carddisp.pl?gene=LBP">https://www.genecards.org/cgi-bin/carddisp.pl?gene=LBP</a>           |
| ACTG1    | Actin Gamma 1                                | Protein Coding | 50 | GC17M081509 | 17.69749 | <a href="https://www.genecards.org/cgi-bin/carddisp.pl?gene=ACTG1">https://www.genecards.org/cgi-bin/carddisp.pl?gene=ACTG1</a>       |
| KRT14    | Keratin 14                                   | Protein Coding | 48 | GC17M041582 | 17.68269 | <a href="https://www.genecards.org/cgi-bin/carddisp.pl?gene=KRT14">https://www.genecards.org/cgi-bin/carddisp.pl?gene=KRT14</a>       |
| DVL2     | Dishevelled Segment Polarity Protein 2       | Protein Coding | 47 | GC17M007225 | 17.6784  | <a href="https://www.genecards.org/cgi-bin/carddisp.pl?gene=DVL2">https://www.genecards.org/cgi-bin/carddisp.pl?gene=DVL2</a>         |
| DECR1    | 2,4-Dienoyl-CoA Reductase 1                  | Protein Coding | 42 | GC08P090001 | 17.6648  | <a href="https://www.genecards.org/cgi-bin/carddisp.pl?gene=DECR1">https://www.genecards.org/cgi-bin/carddisp.pl?gene=DECR1</a>       |
| CES2     | Carboxylesterase 2 Major                     | Protein Coding | 44 | GC16P066934 | 17.66127 | <a href="https://www.genecards.org/cgi-bin/carddisp.pl?gene=CES2">https://www.genecards.org/cgi-bin/carddisp.pl?gene=CES2</a>         |
| HLA-G    | Histocompatibility Complex, Class I, G       | Protein Coding | 45 | GC06P055150 | 17.65405 | <a href="https://www.genecards.org/cgi-bin/carddisp.pl?gene=HLA-G">https://www.genecards.org/cgi-bin/carddisp.pl?gene=HLA-G</a>       |
| EVC2     | EvC Ciliary Complex Subunit 2                | Protein Coding | 40 | GC04M005534 | 17.65048 | <a href="https://www.genecards.org/cgi-bin/carddisp.pl?gene=EVC2">https://www.genecards.org/cgi-bin/carddisp.pl?gene=EVC2</a>         |
| MIR142   | MicroRNA 142                                 | RNA Gene       | 20 | GC17M058331 | 17.63076 | <a href="https://www.genecards.org/cgi-bin/carddisp.pl?gene=MIR142">https://www.genecards.org/cgi-bin/carddisp.pl?gene=MIR142</a>     |
| CCR1     | C-C Motif Chemokine Receptor 1               | Protein Coding | 45 | GC03M046218 | 17.62608 | <a href="https://www.genecards.org/cgi-bin/carddisp.pl?gene=CCR1">https://www.genecards.org/cgi-bin/carddisp.pl?gene=CCR1</a>         |
| HSPA8    | Heat Shock Protein Family A (Hsp70) Member 8 | Protein Coding | 48 | GC11M123057 | 17.62122 | <a href="https://www.genecards.org/cgi-bin/carddisp.pl?gene=HSPA8">https://www.genecards.org/cgi-bin/carddisp.pl?gene=HSPA8</a>       |
| CPT1B    | Carnitine Palmitoyltransferase 1B            | Protein Coding | 45 | GC22M050569 | 17.61032 | <a href="https://www.genecards.org/cgi-bin/carddisp.pl?gene=CPT1B">https://www.genecards.org/cgi-bin/carddisp.pl?gene=CPT1B</a>       |
| SPAST    | Spastin                                      | Protein Coding | 40 | GC02P032063 | 17.58852 | <a href="https://www.genecards.org/cgi-bin/carddisp.pl?gene=SPAST">https://www.genecards.org/cgi-bin/carddisp.pl?gene=SPAST</a>       |
| CBL      | Cbl Proto-Oncogene                           | Protein Coding | 51 | GC11P119206 | 17.58418 | <a href="https://www.genecards.org/cgi-bin/carddisp.pl?gene=CBL">https://www.genecards.org/cgi-bin/carddisp.pl?gene=CBL</a>           |
| PRKG1    | Protein Kinase CGMP-Dependent 1              | Protein Coding | 51 | GC10P050991 | 17.57796 | <a href="https://www.genecards.org/cgi-bin/carddisp.pl?gene=PRKG1">https://www.genecards.org/cgi-bin/carddisp.pl?gene=PRKG1</a>       |

|         |                                                      |                   |    |                 |          |                                                                                                                                     |
|---------|------------------------------------------------------|-------------------|----|-----------------|----------|-------------------------------------------------------------------------------------------------------------------------------------|
| EARS2   | Glutamyl-<br>TRNA<br>Synthetase 2,<br>Mitochondrial  | Protein<br>Coding | 43 | GC16M023<br>527 | 17.57607 | <a href="https://www.genecards.org/cgi-bin/carddisp.pl?gene=EARS2">https://www.genecards.org/cgi-bin/carddisp.pl?gene=EARS2</a>     |
| ZFYVE26 | Zinc Finger<br>FYVE-Type<br>Containing 26            | Protein<br>Coding | 39 | GC14M067<br>727 | 17.56585 | <a href="https://www.genecards.org/cgi-bin/carddisp.pl?gene=ZFYVE26">https://www.genecards.org/cgi-bin/carddisp.pl?gene=ZFYVE26</a> |
| MIR378A | MicroRNA 378a                                        | RNA<br>Gene       | 19 | GC05P1497<br>32 | 17.55978 | <a href="https://www.genecards.org/cgi-bin/carddisp.pl?gene=MIR378A">https://www.genecards.org/cgi-bin/carddisp.pl?gene=MIR378A</a> |
| PHB     | Prohibitin                                           | Protein<br>Coding | 48 | GC17M049<br>404 | 17.55864 | <a href="https://www.genecards.org/cgi-bin/carddisp.pl?gene=PHB">https://www.genecards.org/cgi-bin/carddisp.pl?gene=PHB</a>         |
| MUC5B   | Mucin 5B,<br>Oligomeric<br>Mucus/Gel-<br>Forming     | Protein<br>Coding | 42 | GC11P0012<br>44 | 17.55026 | <a href="https://www.genecards.org/cgi-bin/carddisp.pl?gene=MUC5B">https://www.genecards.org/cgi-bin/carddisp.pl?gene=MUC5B</a>     |
| LIG4    | DNA Ligase 4                                         | Protein<br>Coding | 48 | GC13M108<br>207 | 17.5399  | <a href="https://www.genecards.org/cgi-bin/carddisp.pl?gene=LIG4">https://www.genecards.org/cgi-bin/carddisp.pl?gene=LIG4</a>       |
| ASXL1   | ASXL<br>Transcriptional<br>Regulator 1               | Protein<br>Coding | 43 | GC20P0323<br>64 | 17.53126 | <a href="https://www.genecards.org/cgi-bin/carddisp.pl?gene=ASXL1">https://www.genecards.org/cgi-bin/carddisp.pl?gene=ASXL1</a>     |
| DARS2   | Aspartyl-TRNA<br>Synthetase 2,<br>Mitochondrial      | Protein<br>Coding | 43 | GC01P1738<br>24 | 17.52016 | <a href="https://www.genecards.org/cgi-bin/carddisp.pl?gene=DARS2">https://www.genecards.org/cgi-bin/carddisp.pl?gene=DARS2</a>     |
| SCN1B   | Sodium<br>Voltage-Gated<br>Channel Beta<br>Subunit 1 | Protein<br>Coding | 45 | GC19P0350<br>30 | 17.5088  | <a href="https://www.genecards.org/cgi-bin/carddisp.pl?gene=SCN1B">https://www.genecards.org/cgi-bin/carddisp.pl?gene=SCN1B</a>     |
| MGMT    | O-6-<br>Methylguanine<br>-DNA<br>Methyltransferase   | Protein<br>Coding | 50 | GC10P1294<br>67 | 17.50516 | <a href="https://www.genecards.org/cgi-bin/carddisp.pl?gene=MGMT">https://www.genecards.org/cgi-bin/carddisp.pl?gene=MGMT</a>       |
| ACAN    | Aggrecan                                             | Protein<br>Coding | 46 | GC15P0888<br>13 | 17.49879 | <a href="https://www.genecards.org/cgi-bin/carddisp.pl?gene=ACAN">https://www.genecards.org/cgi-bin/carddisp.pl?gene=ACAN</a>       |
| IL22    | Interleukin 22                                       | Protein<br>Coding | 42 | GC12M068<br>248 | 17.49619 | <a href="https://www.genecards.org/cgi-bin/carddisp.pl?gene=IL22">https://www.genecards.org/cgi-bin/carddisp.pl?gene=IL22</a>       |
| HSPG2   | Heparan<br>Sulfate<br>Proteoglycan 2                 | Protein<br>Coding | 46 | GC01M021<br>822 | 17.49487 | <a href="https://www.genecards.org/cgi-bin/carddisp.pl?gene=HSPG2">https://www.genecards.org/cgi-bin/carddisp.pl?gene=HSPG2</a>     |
| MIR328  | MicroRNA 328                                         | RNA<br>Gene       | 18 | GC16M067<br>203 | 17.4909  | <a href="https://www.genecards.org/cgi-bin/carddisp.pl?gene=MIR328">https://www.genecards.org/cgi-bin/carddisp.pl?gene=MIR328</a>   |
| DNMT3A  | DNA<br>Methyltransferase 3 Alpha                     | Protein<br>Coding | 52 | GC02M025<br>228 | 17.49035 | <a href="https://www.genecards.org/cgi-bin/carddisp.pl?gene=DNMT3A">https://www.genecards.org/cgi-bin/carddisp.pl?gene=DNMT3A</a>   |
| LEPQTL1 | Leptin, Serum<br>Levels Of                           | Genetic<br>Locus  | 2  | GC02U9030<br>86 | 17.46852 | <a href="https://www.genecards.org/cgi-bin/carddisp.pl?gene=LEPQTL1">https://www.genecards.org/cgi-bin/carddisp.pl?gene=LEPQTL1</a> |
| DEGS1   | Delta 4-<br>Desaturase,<br>Sphingolipid 1            | Protein<br>Coding | 41 | GC01P2241<br>75 | 17.44939 | <a href="https://www.genecards.org/cgi-bin/carddisp.pl?gene=DEGS1">https://www.genecards.org/cgi-bin/carddisp.pl?gene=DEGS1</a>     |
| TPO     | Thyroid<br>Peroxidase                                | Protein<br>Coding | 49 | GC02P0013<br>74 | 17.43083 | <a href="https://www.genecards.org/cgi-bin/carddisp.pl?gene=TPO">https://www.genecards.org/cgi-bin/carddisp.pl?gene=TPO</a>         |
| RDH12   | Retinol<br>Dehydrogenase 12                          | Protein<br>Coding | 45 | GC14P0677<br>01 | 17.42397 | <a href="https://www.genecards.org/cgi-bin/carddisp.pl?gene=RDH12">https://www.genecards.org/cgi-bin/carddisp.pl?gene=RDH12</a>     |
| TAT     | Tyrosine<br>Aminotransferase                         | Protein<br>Coding | 45 | GC16M071<br>565 | 17.42278 | <a href="https://www.genecards.org/cgi-bin/carddisp.pl?gene=TAT">https://www.genecards.org/cgi-bin/carddisp.pl?gene=TAT</a>         |



|              |                                                |                   |    |             |          |                                                                                                                                               |
|--------------|------------------------------------------------|-------------------|----|-------------|----------|-----------------------------------------------------------------------------------------------------------------------------------------------|
| TFAP2A       | Transcription Factor AP-2 Alpha                | Protein Coding    | 48 | GC06M010393 | 17.41299 | <a href="https://www.genecards.org/cgi-bin/carddisp.pl?gene=TFAP2A">https://www.genecards.org/cgi-bin/carddisp.pl?gene=TFAP2A</a>             |
| LOC110806263 | TERT 5' Regulatory Region                      | Biological Region | 2  | GC05P001294 | 17.39179 | <a href="https://www.genecards.org/cgi-bin/carddisp.pl?gene=LOC110806263">https://www.genecards.org/cgi-bin/carddisp.pl?gene=LOC110806263</a> |
| SERPINF1     | Serpin Family F Member 1                       | Protein Coding    | 45 | GC17P001761 | 17.36952 | <a href="https://www.genecards.org/cgi-bin/carddisp.pl?gene=SERPINF1">https://www.genecards.org/cgi-bin/carddisp.pl?gene=SERPINF1</a>         |
| ACSF3        | Acyl-CoA Synthetase Family Member 3            | Protein Coding    | 43 | GC16P089088 | 17.36868 | <a href="https://www.genecards.org/cgi-bin/carddisp.pl?gene=ACSF3">https://www.genecards.org/cgi-bin/carddisp.pl?gene=ACSF3</a>               |
| CDK5         | Cyclin Dependent Kinase 5                      | Protein Coding    | 54 | GC07M151053 | 17.36576 | <a href="https://www.genecards.org/cgi-bin/carddisp.pl?gene=CDK5">https://www.genecards.org/cgi-bin/carddisp.pl?gene=CDK5</a>                 |
| KCNQ1OT1     | KCNQ1 Opposite Strand/Antisense Transcript 1   | RNA Gene          | 26 | GC11M002661 | 17.36142 | <a href="https://www.genecards.org/cgi-bin/carddisp.pl?gene=KCNQ1OT1">https://www.genecards.org/cgi-bin/carddisp.pl?gene=KCNQ1OT1</a>         |
| NDUFS8       | NADH:Ubiquinone Oxidoreductase Core Subunit S8 | Protein Coding    | 46 | GC11P068030 | 17.34398 | <a href="https://www.genecards.org/cgi-bin/carddisp.pl?gene=NDUFS8">https://www.genecards.org/cgi-bin/carddisp.pl?gene=NDUFS8</a>             |
| NR0B2        | Nuclear Receptor Subfamily 0 Group B Member 2  | Protein Coding    | 44 | GC01M026922 | 17.3346  | <a href="https://www.genecards.org/cgi-bin/carddisp.pl?gene=NR0B2">https://www.genecards.org/cgi-bin/carddisp.pl?gene=NR0B2</a>               |
| KMT2D        | Lysine Methyltransferase 2D                    | Protein Coding    | 42 | GC12M049018 | 17.33155 | <a href="https://www.genecards.org/cgi-bin/carddisp.pl?gene=KMT2D">https://www.genecards.org/cgi-bin/carddisp.pl?gene=KMT2D</a>               |
| IFNL3        | Interferon Lambda 3                            | Protein Coding    | 35 | GC19M039243 | 17.31583 | <a href="https://www.genecards.org/cgi-bin/carddisp.pl?gene=IFNL3">https://www.genecards.org/cgi-bin/carddisp.pl?gene=IFNL3</a>               |
| FANCC        | FA Complementat ion Group C                    | Protein Coding    | 48 | GC09M095099 | 17.31461 | <a href="https://www.genecards.org/cgi-bin/carddisp.pl?gene=FANCC">https://www.genecards.org/cgi-bin/carddisp.pl?gene=FANCC</a>               |
| APOC1        | Apolipoprotein C1                              | Protein Coding    | 41 | GC19P044914 | 17.29979 | <a href="https://www.genecards.org/cgi-bin/carddisp.pl?gene=APOC1">https://www.genecards.org/cgi-bin/carddisp.pl?gene=APOC1</a>               |
| RTEL1        | Regulator Of Telomere Elongation Helicase 1    | Protein Coding    | 41 | GC20P063658 | 17.26829 | <a href="https://www.genecards.org/cgi-bin/carddisp.pl?gene=RTEL1">https://www.genecards.org/cgi-bin/carddisp.pl?gene=RTEL1</a>               |
| HBG1         | Hemoglobin Subunit Gamma 1                     | Protein Coding    | 43 | GC11M005431 | 17.26441 | <a href="https://www.genecards.org/cgi-bin/carddisp.pl?gene=HBG1">https://www.genecards.org/cgi-bin/carddisp.pl?gene=HBG1</a>                 |
| CDKN2B-AS1   | CDKN2B Antisense RNA 1                         | RNA Gene          | 22 | GC09P021994 | 17.25854 | <a href="https://www.genecards.org/cgi-bin/carddisp.pl?gene=CDKN2B-AS1">https://www.genecards.org/cgi-bin/carddisp.pl?gene=CDKN2B-AS1</a>     |
| GRB2         | Growth Factor Receptor Bound Protein 2         | Protein Coding    | 49 | GC17M075318 | 17.24964 | <a href="https://www.genecards.org/cgi-bin/carddisp.pl?gene=GRB2">https://www.genecards.org/cgi-bin/carddisp.pl?gene=GRB2</a>                 |
| SLC27A3      | Solute Carrier Family 27 Member 3              | Protein Coding    | 40 | GC01P153786 | 17.23686 | <a href="https://www.genecards.org/cgi-bin/carddisp.pl?gene=SLC27A3">https://www.genecards.org/cgi-bin/carddisp.pl?gene=SLC27A3</a>           |

|              |                                                            |                   |    |             |          |                                                                                                                                               |
|--------------|------------------------------------------------------------|-------------------|----|-------------|----------|-----------------------------------------------------------------------------------------------------------------------------------------------|
| RBP1         | Retinol Binding Protein 1                                  | Protein Coding    | 40 | GC03M139517 | 17.22531 | <a href="https://www.genecards.org/cgi-bin/carddisp.pl?gene=RBP1">https://www.genecards.org/cgi-bin/carddisp.pl?gene=RBP1</a>                 |
| PLAUR        | Plasminogen Activator, Urokinase Receptor                  | Protein Coding    | 45 | GC19M043646 | 17.22167 | <a href="https://www.genecards.org/cgi-bin/carddisp.pl?gene=PLAUR">https://www.genecards.org/cgi-bin/carddisp.pl?gene=PLAUR</a>               |
| EMD          | Emerin                                                     | Protein Coding    | 45 | GC0XP154379 | 17.18898 | <a href="https://www.genecards.org/cgi-bin/carddisp.pl?gene=EMD">https://www.genecards.org/cgi-bin/carddisp.pl?gene=EMD</a>                   |
| FLT4         | Fms Related Receptor Tyrosine Kinase 4                     | Protein Coding    | 52 | GC05M180607 | 17.17457 | <a href="https://www.genecards.org/cgi-bin/carddisp.pl?gene=FLT4">https://www.genecards.org/cgi-bin/carddisp.pl?gene=FLT4</a>                 |
| PCNA         | Proliferating Cell Nuclear Antigen                         | Protein Coding    | 52 | GC20M005114 | 17.17124 | <a href="https://www.genecards.org/cgi-bin/carddisp.pl?gene=PCNA">https://www.genecards.org/cgi-bin/carddisp.pl?gene=PCNA</a>                 |
| ADM          | Adrenomedullin                                             | Protein Coding    | 45 | GC11P010304 | 17.15399 | <a href="https://www.genecards.org/cgi-bin/carddisp.pl?gene=ADM">https://www.genecards.org/cgi-bin/carddisp.pl?gene=ADM</a>                   |
| SOX2         | SRY-Box Transcription Factor 2                             | Protein Coding    | 48 | GC03P181711 | 17.14379 | <a href="https://www.genecards.org/cgi-bin/carddisp.pl?gene=SOX2">https://www.genecards.org/cgi-bin/carddisp.pl?gene=SOX2</a>                 |
| CALB2        | Calbindin 2                                                | Protein Coding    | 41 | GC16P071392 | 17.14216 | <a href="https://www.genecards.org/cgi-bin/carddisp.pl?gene=CALB2">https://www.genecards.org/cgi-bin/carddisp.pl?gene=CALB2</a>               |
| FBP1         | Fructose-Bisphosphatase 1                                  | Protein Coding    | 50 | GC09M094603 | 17.13457 | <a href="https://www.genecards.org/cgi-bin/carddisp.pl?gene=FBP1">https://www.genecards.org/cgi-bin/carddisp.pl?gene=FBP1</a>                 |
| XRCC2        | X-Ray Repair Cross Complementing 2                         | Protein Coding    | 43 | GC07M152644 | 17.10191 | <a href="https://www.genecards.org/cgi-bin/carddisp.pl?gene=XRCC2">https://www.genecards.org/cgi-bin/carddisp.pl?gene=XRCC2</a>               |
| LOC111674472 | DNase I Hypersensitive Sites In Introns 16 And 17a Of CFTR | Biological Region | 2  | GC07P117607 | 17.10055 | <a href="https://www.genecards.org/cgi-bin/carddisp.pl?gene=LOC111674472">https://www.genecards.org/cgi-bin/carddisp.pl?gene=LOC111674472</a> |
| KCNJ5        | Potassium Inwardly Rectifying Channel Subfamily J Member 5 | Protein Coding    | 48 | GC11P128891 | 17.08913 | <a href="https://www.genecards.org/cgi-bin/carddisp.pl?gene=KCNJ5">https://www.genecards.org/cgi-bin/carddisp.pl?gene=KCNJ5</a>               |
| BLK          | BLK Proto-Oncogene, Src Family Tyrosine Kinase             | Protein Coding    | 51 | GC08P011486 | 17.08165 | <a href="https://www.genecards.org/cgi-bin/carddisp.pl?gene=BLK">https://www.genecards.org/cgi-bin/carddisp.pl?gene=BLK</a>                   |
| DNASE1       | Deoxyribonuclease 1                                        | Protein Coding    | 43 | GC16P003611 | 17.08039 | <a href="https://www.genecards.org/cgi-bin/carddisp.pl?gene=DNASE1">https://www.genecards.org/cgi-bin/carddisp.pl?gene=DNASE1</a>             |
| AKT3         | AKT Serine/Threonine Kinase 3                              | Protein Coding    | 54 | GC01M243488 | 17.07912 | <a href="https://www.genecards.org/cgi-bin/carddisp.pl?gene=AKT3">https://www.genecards.org/cgi-bin/carddisp.pl?gene=AKT3</a>                 |
| GATA2        | GATA Binding Protein 2                                     | Protein Coding    | 48 | GC03M128479 | 17.0775  | <a href="https://www.genecards.org/cgi-bin/carddisp.pl?gene=GATA2">https://www.genecards.org/cgi-bin/carddisp.pl?gene=GATA2</a>               |
| MT-TE        | Mitochondrially Encoded TRNA-Glu (GAA/G)                   | RNA Gene          | 13 | GCMTM012350 | 17.06599 | <a href="https://www.genecards.org/cgi-bin/carddisp.pl?gene=MT-TE">https://www.genecards.org/cgi-bin/carddisp.pl?gene=MT-TE</a>               |

|         |                                                          |                |    |             |          |                                                                                                                                     |
|---------|----------------------------------------------------------|----------------|----|-------------|----------|-------------------------------------------------------------------------------------------------------------------------------------|
| SFTPB   | Surfactant Protein B                                     | Protein Coding | 44 | GC02M085657 | 17.06023 | <a href="https://www.genecards.org/cgi-bin/carddisp.pl?gene=SFTPB">https://www.genecards.org/cgi-bin/carddisp.pl?gene=SFTPB</a>     |
| PNLIP   | Pancreatic Lipase C-X-C Motif                            | Protein Coding | 48 | GC10P116545 | 17.04584 | <a href="https://www.genecards.org/cgi-bin/carddisp.pl?gene=PNLIP">https://www.genecards.org/cgi-bin/carddisp.pl?gene=PNLIP</a>     |
| CXCR3   | Chemokine Receptor 3                                     | Protein Coding | 45 | GC0XM071615 | 17.03813 | <a href="https://www.genecards.org/cgi-bin/carddisp.pl?gene=CXCR3">https://www.genecards.org/cgi-bin/carddisp.pl?gene=CXCR3</a>     |
| BLVRA   | Biliverdin Reductase A                                   | Protein Coding | 45 | GC07P043758 | 17.02469 | <a href="https://www.genecards.org/cgi-bin/carddisp.pl?gene=BLVRA">https://www.genecards.org/cgi-bin/carddisp.pl?gene=BLVRA</a>     |
| PLTP    | Phospholipid Transfer Protein                            | Protein Coding | 44 | GC20M045898 | 17.01707 | <a href="https://www.genecards.org/cgi-bin/carddisp.pl?gene=PLTP">https://www.genecards.org/cgi-bin/carddisp.pl?gene=PLTP</a>       |
| WWOX    | WW Domain Containing Oxidoreductase                      | Protein Coding | 48 | GC16P078099 | 17.01404 | <a href="https://www.genecards.org/cgi-bin/carddisp.pl?gene=WWOX">https://www.genecards.org/cgi-bin/carddisp.pl?gene=WWOX</a>       |
| FUCA1   | Alpha-L-Fucosidase 1                                     | Protein Coding | 47 | GC01M023845 | 16.9952  | <a href="https://www.genecards.org/cgi-bin/carddisp.pl?gene=FUCA1">https://www.genecards.org/cgi-bin/carddisp.pl?gene=FUCA1</a>     |
| TSHR    | Thyroid Stimulating Hormone Receptor                     | Protein Coding | 48 | GC14P080954 | 16.98258 | <a href="https://www.genecards.org/cgi-bin/carddisp.pl?gene=TSHR">https://www.genecards.org/cgi-bin/carddisp.pl?gene=TSHR</a>       |
| CFHR1   | Complement Factor H Related 1                            | Protein Coding | 42 | GC01P196822 | 16.97022 | <a href="https://www.genecards.org/cgi-bin/carddisp.pl?gene=CFHR1">https://www.genecards.org/cgi-bin/carddisp.pl?gene=CFHR1</a>     |
| ATP2C1  | ATPase Secretory Pathway Ca <sup>2+</sup> Transporting 1 | Protein Coding | 45 | GC03P130850 | 16.96741 | <a href="https://www.genecards.org/cgi-bin/carddisp.pl?gene=ATP2C1">https://www.genecards.org/cgi-bin/carddisp.pl?gene=ATP2C1</a>   |
| GRM5    | Glutamate Metabotropic Receptor 5                        | Protein Coding | 48 | GC11M088504 | 16.96287 | <a href="https://www.genecards.org/cgi-bin/carddisp.pl?gene=GRM5">https://www.genecards.org/cgi-bin/carddisp.pl?gene=GRM5</a>       |
| BMP4    | Bone Morphogenetic Protein 4                             | Protein Coding | 50 | GC14M053949 | 16.94471 | <a href="https://www.genecards.org/cgi-bin/carddisp.pl?gene=BMP4">https://www.genecards.org/cgi-bin/carddisp.pl?gene=BMP4</a>       |
| DKC1    | Dyskerin Pseudouridine Synthase 1                        | Protein Coding | 48 | GC0XP154762 | 16.93802 | <a href="https://www.genecards.org/cgi-bin/carddisp.pl?gene=DKC1">https://www.genecards.org/cgi-bin/carddisp.pl?gene=DKC1</a>       |
| SLC12A3 | Solute Carrier Family 12 Member 3                        | Protein Coding | 47 | GC16P056865 | 16.92522 | <a href="https://www.genecards.org/cgi-bin/carddisp.pl?gene=SLC12A3">https://www.genecards.org/cgi-bin/carddisp.pl?gene=SLC12A3</a> |
| SOCS1   | Suppressor Of Cytokine Signaling 1                       | Protein Coding | 44 | GC16M011255 | 16.91556 | <a href="https://www.genecards.org/cgi-bin/carddisp.pl?gene=SOCS1">https://www.genecards.org/cgi-bin/carddisp.pl?gene=SOCS1</a>     |
| JPH3    | Junctophilin 3                                           | Protein Coding | 42 | GC16P087601 | 16.88008 | <a href="https://www.genecards.org/cgi-bin/carddisp.pl?gene=JPH3">https://www.genecards.org/cgi-bin/carddisp.pl?gene=JPH3</a>       |
| PRDX1   | Peroxisredoxin 1                                         | Protein Coding | 50 | GC01M045511 | 16.84415 | <a href="https://www.genecards.org/cgi-bin/carddisp.pl?gene=PRDX1">https://www.genecards.org/cgi-bin/carddisp.pl?gene=PRDX1</a>     |
| NQO2    | N-Ribosyldihydro nicotinamide:Quinone Reductase 2        | Protein Coding | 46 | GC06P003014 | 16.83867 | <a href="https://www.genecards.org/cgi-bin/carddisp.pl?gene=NQO2">https://www.genecards.org/cgi-bin/carddisp.pl?gene=NQO2</a>       |
| HDAC1   | Histone Deacetylase 1                                    | Protein Coding | 50 | GC01P032292 | 16.8233  | <a href="https://www.genecards.org/cgi-bin/carddisp.pl?gene=HDAC1">https://www.genecards.org/cgi-bin/carddisp.pl?gene=HDAC1</a>     |
| BECN1   | Beclin 1                                                 | Protein Coding | 47 | GC17M042810 | 16.81464 | <a href="https://www.genecards.org/cgi-bin/carddisp.pl?gene=BECN1">https://www.genecards.org/cgi-bin/carddisp.pl?gene=BECN1</a>     |

|        |                                                         |                |    |             |          |                                                                                                                                   |
|--------|---------------------------------------------------------|----------------|----|-------------|----------|-----------------------------------------------------------------------------------------------------------------------------------|
| CYB5A  | Cytochrome B5 Type A                                    | Protein Coding | 45 | GC18M074250 | 16.79537 | <a href="https://www.genecards.org/cgi-bin/carddisp.pl?gene=CYB5A">https://www.genecards.org/cgi-bin/carddisp.pl?gene=CYB5A</a>   |
| ASGR2  | Asialoglycoprotein Receptor 2                           | Protein Coding | 41 | GC17M007101 | 16.7761  | <a href="https://www.genecards.org/cgi-bin/carddisp.pl?gene=ASGR2">https://www.genecards.org/cgi-bin/carddisp.pl?gene=ASGR2</a>   |
| MUC5AC | Mucin 5AC, Oligomeric Mucus/Gel-Forming                 | Protein Coding | 39 | GC11P001151 | 16.76953 | <a href="https://www.genecards.org/cgi-bin/carddisp.pl?gene=MUC5AC">https://www.genecards.org/cgi-bin/carddisp.pl?gene=MUC5AC</a> |
| PECR   | Peroxisomal Trans-2-Enoyl-CoA Reductase                 | Protein Coding | 43 | GC02M215996 | 16.7628  | <a href="https://www.genecards.org/cgi-bin/carddisp.pl?gene=PECR">https://www.genecards.org/cgi-bin/carddisp.pl?gene=PECR</a>     |
| POMT1  | Protein O-Mannosyltransferase 1 Mitochondrially Encoded | Protein Coding | 47 | GC09P131502 | 16.75833 | <a href="https://www.genecards.org/cgi-bin/carddisp.pl?gene=POMT1">https://www.genecards.org/cgi-bin/carddisp.pl?gene=POMT1</a>   |
| MT-TS1 | TRNA-Ser (UCN) 1                                        | RNA Gene       | 15 | GCMTM005917 | 16.75518 | <a href="https://www.genecards.org/cgi-bin/carddisp.pl?gene=MT-TS1">https://www.genecards.org/cgi-bin/carddisp.pl?gene=MT-TS1</a> |
| MYCN   | MYCN Proto-Oncogene, BHLH Transcription Factor          | Protein Coding | 47 | GC02P015949 | 16.74515 | <a href="https://www.genecards.org/cgi-bin/carddisp.pl?gene=MYCN">https://www.genecards.org/cgi-bin/carddisp.pl?gene=MYCN</a>     |
| AIP    | Aryl Hydrocarbon Receptor Interacting Protein           | Protein Coding | 45 | GC11P067468 | 16.7333  | <a href="https://www.genecards.org/cgi-bin/carddisp.pl?gene=AIP">https://www.genecards.org/cgi-bin/carddisp.pl?gene=AIP</a>       |
| CFB    | Complement Factor B                                     | Protein Coding | 46 | GC06P031945 | 16.72658 | <a href="https://www.genecards.org/cgi-bin/carddisp.pl?gene=CFB">https://www.genecards.org/cgi-bin/carddisp.pl?gene=CFB</a>       |
| NTS    | Neurotensin                                             | Protein Coding | 41 | GC12P085876 | 16.70058 | <a href="https://www.genecards.org/cgi-bin/carddisp.pl?gene=NTS">https://www.genecards.org/cgi-bin/carddisp.pl?gene=NTS</a>       |
| FNDC5  | Fibronectin Type III Domain Containing 5                | Protein Coding | 34 | GC01M032866 | 16.69098 | <a href="https://www.genecards.org/cgi-bin/carddisp.pl?gene=FNDC5">https://www.genecards.org/cgi-bin/carddisp.pl?gene=FNDC5</a>   |
| GZMB   | Granzyme B                                              | Protein Coding | 46 | GC14M024630 | 16.68339 | <a href="https://www.genecards.org/cgi-bin/carddisp.pl?gene=GZMB">https://www.genecards.org/cgi-bin/carddisp.pl?gene=GZMB</a>     |
| U2AF1  | U2 Small Nuclear RNA Auxiliary Factor 1                 | Protein Coding | 44 | GC21M043092 | 16.68231 | <a href="https://www.genecards.org/cgi-bin/carddisp.pl?gene=U2AF1">https://www.genecards.org/cgi-bin/carddisp.pl?gene=U2AF1</a>   |
| TWIST1 | Twist Family BHLH Transcription Factor 1                | Protein Coding | 47 | GC07M019020 | 16.68091 | <a href="https://www.genecards.org/cgi-bin/carddisp.pl?gene=TWIST1">https://www.genecards.org/cgi-bin/carddisp.pl?gene=TWIST1</a> |
| PIK3R2 | Phosphoinositide-3-Kinase Regulatory Subunit 2          | Protein Coding | 50 | GC19P018153 | 16.66394 | <a href="https://www.genecards.org/cgi-bin/carddisp.pl?gene=PIK3R2">https://www.genecards.org/cgi-bin/carddisp.pl?gene=PIK3R2</a> |
| GSS    | Glutathione Synthetase                                  | Protein Coding | 47 | GC20M034928 | 16.64843 | <a href="https://www.genecards.org/cgi-bin/carddisp.pl?gene=GSS">https://www.genecards.org/cgi-bin/carddisp.pl?gene=GSS</a>       |

|          |                                                                                         |                   |    |                 |          |                                                                                                                                       |
|----------|-----------------------------------------------------------------------------------------|-------------------|----|-----------------|----------|---------------------------------------------------------------------------------------------------------------------------------------|
| NPHS2    | NPHS2<br>Stomatin<br>Family<br>Member,<br>Podocin<br>BRCA1<br>Interacting<br>Helicase 1 | Protein<br>Coding | 42 | GC01M179<br>519 | 16.62767 | <a href="https://www.genecards.org/cgi-bin/carddisp.pl?gene=NPHS2">https://www.genecards.org/cgi-bin/carddisp.pl?gene=NPHS2</a>       |
| BRIP1    | BRIP1<br>Interacting<br>Helicase 1                                                      | Protein<br>Coding | 48 | GC17M061<br>679 | 16.60106 | <a href="https://www.genecards.org/cgi-bin/carddisp.pl?gene=BRIP1">https://www.genecards.org/cgi-bin/carddisp.pl?gene=BRIP1</a>       |
| HOTAIR   | HOX Transcript<br>Antisense RNA                                                         | RNA<br>Gene       | 26 | GC12M053<br>962 | 16.59629 | <a href="https://www.genecards.org/cgi-bin/carddisp.pl?gene=HOTAIR">https://www.genecards.org/cgi-bin/carddisp.pl?gene=HOTAIR</a>     |
| SERPINH1 | Serpin Family H<br>Member 1                                                             | Protein<br>Coding | 46 | GC11P0755<br>62 | 16.57393 | <a href="https://www.genecards.org/cgi-bin/carddisp.pl?gene=SERPINH1">https://www.genecards.org/cgi-bin/carddisp.pl?gene=SERPINH1</a> |
| CXCL1    | C-X-C Motif<br>Chemokine<br>Ligand 1                                                    | Protein<br>Coding | 43 | GC04P0738<br>69 | 16.56734 | <a href="https://www.genecards.org/cgi-bin/carddisp.pl?gene=CXCL1">https://www.genecards.org/cgi-bin/carddisp.pl?gene=CXCL1</a>       |
| TINF2    | TERF1<br>Interacting<br>Nuclear Factor<br>2                                             | Protein<br>Coding | 42 | GC14M024<br>234 | 16.55839 | <a href="https://www.genecards.org/cgi-bin/carddisp.pl?gene=TINF2">https://www.genecards.org/cgi-bin/carddisp.pl?gene=TINF2</a>       |
| AQP1     | Aquaporin 1<br>(Colton Blood<br>Group)                                                  | Protein<br>Coding | 47 | GC07P0309<br>11 | 16.5561  | <a href="https://www.genecards.org/cgi-bin/carddisp.pl?gene=AQP1">https://www.genecards.org/cgi-bin/carddisp.pl?gene=AQP1</a>         |
| FZD4     | Frizzled Class<br>Receptor 4                                                            | Protein<br>Coding | 51 | GC11M086<br>945 | 16.54615 | <a href="https://www.genecards.org/cgi-bin/carddisp.pl?gene=FZD4">https://www.genecards.org/cgi-bin/carddisp.pl?gene=FZD4</a>         |
| HTR2C    | 5-<br>Hydroxytrypta<br>mine Receptor<br>2C                                              | Protein<br>Coding | 48 | GC0XP1145<br>84 | 16.51718 | <a href="https://www.genecards.org/cgi-bin/carddisp.pl?gene=HTR2C">https://www.genecards.org/cgi-bin/carddisp.pl?gene=HTR2C</a>       |
| CA2      | Carbonic<br>Anhydrase 2<br>Signal<br>Transducer<br>And Activator<br>Of                  | Protein<br>Coding | 52 | GC08P0854<br>63 | 16.51351 | <a href="https://www.genecards.org/cgi-bin/carddisp.pl?gene=CA2">https://www.genecards.org/cgi-bin/carddisp.pl?gene=CA2</a>           |
| STAT6    | Transcription 6                                                                         | Protein<br>Coding | 50 | GC12M057<br>095 | 16.50465 | <a href="https://www.genecards.org/cgi-bin/carddisp.pl?gene=STAT6">https://www.genecards.org/cgi-bin/carddisp.pl?gene=STAT6</a>       |
| FGB      | Fibrinogen<br>Beta Chain                                                                | Protein<br>Coding | 47 | GC04P1545<br>72 | 16.48997 | <a href="https://www.genecards.org/cgi-bin/carddisp.pl?gene=FGB">https://www.genecards.org/cgi-bin/carddisp.pl?gene=FGB</a>           |
| SLC10A2  | Solute Carrier<br>Family 10<br>Member 2                                                 | Protein<br>Coding | 43 | GC13M103<br>043 | 16.4813  | <a href="https://www.genecards.org/cgi-bin/carddisp.pl?gene=SLC10A2">https://www.genecards.org/cgi-bin/carddisp.pl?gene=SLC10A2</a>   |
| GLS      | Glutaminase                                                                             | Protein<br>Coding | 48 | GC02P1908<br>80 | 16.46054 | <a href="https://www.genecards.org/cgi-bin/carddisp.pl?gene=GLS">https://www.genecards.org/cgi-bin/carddisp.pl?gene=GLS</a>           |
| EIF2AK2  | Eukaryotic<br>Translation<br>Initiation Factor<br>2 Alpha Kinase<br>2                   | Protein<br>Coding | 46 | GC02M037<br>099 | 16.45991 | <a href="https://www.genecards.org/cgi-bin/carddisp.pl?gene=EIF2AK2">https://www.genecards.org/cgi-bin/carddisp.pl?gene=EIF2AK2</a>   |
| TKT      | Transketolase                                                                           | Protein<br>Coding | 48 | GC03M053<br>224 | 16.45034 | <a href="https://www.genecards.org/cgi-bin/carddisp.pl?gene=TKT">https://www.genecards.org/cgi-bin/carddisp.pl?gene=TKT</a>           |
| SUMF1    | Sulfatase<br>Modifying<br>Factor 1                                                      | Protein<br>Coding | 43 | GC03M003<br>700 | 16.44326 | <a href="https://www.genecards.org/cgi-bin/carddisp.pl?gene=SUMF1">https://www.genecards.org/cgi-bin/carddisp.pl?gene=SUMF1</a>       |

|          |                                                             |                |    |             |          |                                                                                                                                       |
|----------|-------------------------------------------------------------|----------------|----|-------------|----------|---------------------------------------------------------------------------------------------------------------------------------------|
| KCNJ10   | Potassium Inwardly Rectifying Channel Subfamily J Member 10 | Protein Coding | 45 | GC01M159998 | 16.42751 | <a href="https://www.genecards.org/cgi-bin/carddisp.pl?gene=KCNJ10">https://www.genecards.org/cgi-bin/carddisp.pl?gene=KCNJ10</a>     |
| FH       | Fumarate Hydratase                                          | Protein Coding | 46 | GC01M241499 | 16.41443 | <a href="https://www.genecards.org/cgi-bin/carddisp.pl?gene=FH">https://www.genecards.org/cgi-bin/carddisp.pl?gene=FH</a>             |
| CS       | Citrate Synthase                                            | Protein Coding | 45 | GC12M056271 | 16.41187 | <a href="https://www.genecards.org/cgi-bin/carddisp.pl?gene=CS">https://www.genecards.org/cgi-bin/carddisp.pl?gene=CS</a>             |
| ADD1     | Adducin 1                                                   | Protein Coding | 45 | GC04P002855 | 16.4056  | <a href="https://www.genecards.org/cgi-bin/carddisp.pl?gene=ADD1">https://www.genecards.org/cgi-bin/carddisp.pl?gene=ADD1</a>         |
| TBC1D24  | TBC1 Domain Family Member 24                                | Protein Coding | 38 | GC16P002475 | 16.40266 | <a href="https://www.genecards.org/cgi-bin/carddisp.pl?gene=TBC1D24">https://www.genecards.org/cgi-bin/carddisp.pl?gene=TBC1D24</a>   |
| MFSD8    | Major Facilitator Superfamily Domain Containing 8           | Protein Coding | 37 | GC04M127917 | 16.39691 | <a href="https://www.genecards.org/cgi-bin/carddisp.pl?gene=MFSD8">https://www.genecards.org/cgi-bin/carddisp.pl?gene=MFSD8</a>       |
| C5       | Complement C5                                               | Protein Coding | 47 | GC09M120952 | 16.39404 | <a href="https://www.genecards.org/cgi-bin/carddisp.pl?gene=C5">https://www.genecards.org/cgi-bin/carddisp.pl?gene=C5</a>             |
| KIAA0586 | KIAA0586                                                    | Protein Coding | 36 | GC14P058427 | 16.39266 | <a href="https://www.genecards.org/cgi-bin/carddisp.pl?gene=KIAA0586">https://www.genecards.org/cgi-bin/carddisp.pl?gene=KIAA0586</a> |
| CCNA2    | Cyclin A2                                                   | Protein Coding | 46 | GC04M121816 | 16.38851 | <a href="https://www.genecards.org/cgi-bin/carddisp.pl?gene=CCNA2">https://www.genecards.org/cgi-bin/carddisp.pl?gene=CCNA2</a>       |
| PF4      | Platelet Factor 4                                           | Protein Coding | 42 | GC04M073980 | 16.38232 | <a href="https://www.genecards.org/cgi-bin/carddisp.pl?gene=PF4">https://www.genecards.org/cgi-bin/carddisp.pl?gene=PF4</a>           |
| ALDH1B1  | Aldehyde Dehydrogenase 1 Family Member B1                   | Protein Coding | 45 | GC09P038392 | 16.37377 | <a href="https://www.genecards.org/cgi-bin/carddisp.pl?gene=ALDH1B1">https://www.genecards.org/cgi-bin/carddisp.pl?gene=ALDH1B1</a>   |
| DHFR     | Dihydrofolate Reductase                                     | Protein Coding | 50 | GC05M080626 | 16.36003 | <a href="https://www.genecards.org/cgi-bin/carddisp.pl?gene=DHFR">https://www.genecards.org/cgi-bin/carddisp.pl?gene=DHFR</a>         |
| PLIN1    | Perilipin 1                                                 | Protein Coding | 45 | GC15M089664 | 16.35218 | <a href="https://www.genecards.org/cgi-bin/carddisp.pl?gene=PLIN1">https://www.genecards.org/cgi-bin/carddisp.pl?gene=PLIN1</a>       |
| THBS1    | Thrombospondin 1                                            | Protein Coding | 45 | GC15P039581 | 16.34905 | <a href="https://www.genecards.org/cgi-bin/carddisp.pl?gene=THBS1">https://www.genecards.org/cgi-bin/carddisp.pl?gene=THBS1</a>       |
| AHCY     | Adenosylhomocysteinase                                      | Protein Coding | 51 | GC20M034341 | 16.34795 | <a href="https://www.genecards.org/cgi-bin/carddisp.pl?gene=AHCY">https://www.genecards.org/cgi-bin/carddisp.pl?gene=AHCY</a>         |
| CDC42    | Cell Division Cycle 42                                      | Protein Coding | 51 | GC01P022112 | 16.34657 | <a href="https://www.genecards.org/cgi-bin/carddisp.pl?gene=CDC42">https://www.genecards.org/cgi-bin/carddisp.pl?gene=CDC42</a>       |
| ATP6AP2  | ATPase H+ Transporting Accessory Protein 2                  | Protein Coding | 45 | GC0XP040582 | 16.3449  | <a href="https://www.genecards.org/cgi-bin/carddisp.pl?gene=ATP6AP2">https://www.genecards.org/cgi-bin/carddisp.pl?gene=ATP6AP2</a>   |
| LMBRD1   | LMBR1 Domain Containing 1                                   | Protein Coding | 39 | GC06M069675 | 16.33275 | <a href="https://www.genecards.org/cgi-bin/carddisp.pl?gene=LMBRD1">https://www.genecards.org/cgi-bin/carddisp.pl?gene=LMBRD1</a>     |
| ACTN4    | Actinin Alpha 4                                             | Protein Coding | 47 | GC19P038647 | 16.31758 | <a href="https://www.genecards.org/cgi-bin/carddisp.pl?gene=ACTN4">https://www.genecards.org/cgi-bin/carddisp.pl?gene=ACTN4</a>       |
| ANGPTL3  | Angiopoietin Like 3                                         | Protein Coding | 46 | GC01P062597 | 16.31535 | <a href="https://www.genecards.org/cgi-bin/carddisp.pl?gene=ANGPTL3">https://www.genecards.org/cgi-bin/carddisp.pl?gene=ANGPTL3</a>   |
| MECR     | Mitochondrial Trans-2-Enoyl-CoA Reductase                   | Protein Coding | 44 | GC01M029192 | 16.31058 | <a href="https://www.genecards.org/cgi-bin/carddisp.pl?gene=MECR">https://www.genecards.org/cgi-bin/carddisp.pl?gene=MECR</a>         |

|         |                                                                                                   |                |    |             |          |                                                                                                                                     |
|---------|---------------------------------------------------------------------------------------------------|----------------|----|-------------|----------|-------------------------------------------------------------------------------------------------------------------------------------|
| IFT122  | Intraflagellar Transport 122 Protein                                                              | Protein Coding | 40 | GC03P129440 | 16.3056  | <a href="https://www.genecards.org/cgi-bin/carddisp.pl?gene=IFT122">https://www.genecards.org/cgi-bin/carddisp.pl?gene=IFT122</a>   |
| PTPN3   | Tyrosine Phosphatase Non-Receptor Type 3                                                          | Protein Coding | 45 | GC09M109375 | 16.29969 | <a href="https://www.genecards.org/cgi-bin/carddisp.pl?gene=PTPN3">https://www.genecards.org/cgi-bin/carddisp.pl?gene=PTPN3</a>     |
| IL7     | Interleukin 7                                                                                     | Protein Coding | 43 | GC08M078689 | 16.29952 | <a href="https://www.genecards.org/cgi-bin/carddisp.pl?gene=IL7">https://www.genecards.org/cgi-bin/carddisp.pl?gene=IL7</a>         |
| CYP27B1 | Cytochrome P450 Family 27 Subfamily B Member 1 Steroidogenic                                      | Protein Coding | 48 | GC12M057757 | 16.29617 | <a href="https://www.genecards.org/cgi-bin/carddisp.pl?gene=CYP27B1">https://www.genecards.org/cgi-bin/carddisp.pl?gene=CYP27B1</a> |
| STAR    | Acute Regulatory Protein                                                                          | Protein Coding | 47 | GC08M038145 | 16.29576 | <a href="https://www.genecards.org/cgi-bin/carddisp.pl?gene=STAR">https://www.genecards.org/cgi-bin/carddisp.pl?gene=STAR</a>       |
| ODC1    | Ornithine Decarboxylase 1                                                                         | Protein Coding | 49 | GC02M010432 | 16.29564 | <a href="https://www.genecards.org/cgi-bin/carddisp.pl?gene=ODC1">https://www.genecards.org/cgi-bin/carddisp.pl?gene=ODC1</a>       |
| TTPA    | Alpha Tocopherol Transfer Protein                                                                 | Protein Coding | 41 | GC08M063048 | 16.29455 | <a href="https://www.genecards.org/cgi-bin/carddisp.pl?gene=TTPA">https://www.genecards.org/cgi-bin/carddisp.pl?gene=TTPA</a>       |
| MYO7A   | Myosin VIIA                                                                                       | Protein Coding | 43 | GC11P077128 | 16.28915 | <a href="https://www.genecards.org/cgi-bin/carddisp.pl?gene=MYO7A">https://www.genecards.org/cgi-bin/carddisp.pl?gene=MYO7A</a>     |
| CHI3L1  | Chitinase 3 Like 1                                                                                | Protein Coding | 44 | GC01M203148 | 16.28605 | <a href="https://www.genecards.org/cgi-bin/carddisp.pl?gene=CHI3L1">https://www.genecards.org/cgi-bin/carddisp.pl?gene=CHI3L1</a>   |
| KCNV2   | Potassium Voltage-Gated Channel Modifier Subfamily V Member 2 SWI/SNF Related, Matrix Associated, | Protein Coding | 41 | GC09P002717 | 16.28587 | <a href="https://www.genecards.org/cgi-bin/carddisp.pl?gene=KCNV2">https://www.genecards.org/cgi-bin/carddisp.pl?gene=KCNV2</a>     |
| SMARCA2 | Actin Dependent Regulator Of Chromatin, Subfamily A, Member 2                                     | Protein Coding | 50 | GC09P001980 | 16.28386 | <a href="https://www.genecards.org/cgi-bin/carddisp.pl?gene=SMARCA2">https://www.genecards.org/cgi-bin/carddisp.pl?gene=SMARCA2</a> |
| IRGM    | Immunity Related GTPase M                                                                         | Protein Coding | 38 | GC05P150846 | 16.27772 | <a href="https://www.genecards.org/cgi-bin/carddisp.pl?gene=IRGM">https://www.genecards.org/cgi-bin/carddisp.pl?gene=IRGM</a>       |
| SIL1    | SIL1 Nucleotide Exchange Factor                                                                   | Protein Coding | 41 | GC05M138957 | 16.26973 | <a href="https://www.genecards.org/cgi-bin/carddisp.pl?gene=SIL1">https://www.genecards.org/cgi-bin/carddisp.pl?gene=SIL1</a>       |
| COX4I1  | Cytochrome C Oxidase Subunit 4I1                                                                  | Protein Coding | 47 | GC16P085798 | 16.25666 | <a href="https://www.genecards.org/cgi-bin/carddisp.pl?gene=COX4I1">https://www.genecards.org/cgi-bin/carddisp.pl?gene=COX4I1</a>   |
| VPS13B  | Vacuolar Protein Sorting 13 Homolog B                                                             | Protein Coding | 40 | GC08P099011 | 16.25064 | <a href="https://www.genecards.org/cgi-bin/carddisp.pl?gene=VPS13B">https://www.genecards.org/cgi-bin/carddisp.pl?gene=VPS13B</a>   |
| CD163   | CD163 Molecule                                                                                    | Protein Coding | 43 | GC12M007471 | 16.23718 | <a href="https://www.genecards.org/cgi-bin/carddisp.pl?gene=CD163">https://www.genecards.org/cgi-bin/carddisp.pl?gene=CD163</a>     |

|              |                                                                     |                   |    |             |          |                                                                                                                                               |
|--------------|---------------------------------------------------------------------|-------------------|----|-------------|----------|-----------------------------------------------------------------------------------------------------------------------------------------------|
| NDUFA6       | NADH:Ubiquinone Oxidoreductase Subunit A6                           | Protein Coding    | 45 | GC22M042085 | 16.23557 | <a href="https://www.genecards.org/cgi-bin/carddisp.pl?gene=NDUFA6">https://www.genecards.org/cgi-bin/carddisp.pl?gene=NDUFA6</a>             |
| S100A8       | S100 Calcium Binding Protein A8                                     | Protein Coding    | 43 | GC01M153391 | 16.23479 | <a href="https://www.genecards.org/cgi-bin/carddisp.pl?gene=S100A8">https://www.genecards.org/cgi-bin/carddisp.pl?gene=S100A8</a>             |
| COL4A2       | Collagen Type IV Alpha 2 Chain                                      | Protein Coding    | 45 | GC13P110305 | 16.2328  | <a href="https://www.genecards.org/cgi-bin/carddisp.pl?gene=COL4A2">https://www.genecards.org/cgi-bin/carddisp.pl?gene=COL4A2</a>             |
| CCNB1        | Cyclin B1                                                           | Protein Coding    | 47 | GC05P069167 | 16.22871 | <a href="https://www.genecards.org/cgi-bin/carddisp.pl?gene=CCNB1">https://www.genecards.org/cgi-bin/carddisp.pl?gene=CCNB1</a>               |
| TNFRSF10B    | TNF Receptor Superfamily Member 10b                                 | Protein Coding    | 51 | GC08M023020 | 16.2237  | <a href="https://www.genecards.org/cgi-bin/carddisp.pl?gene=TNFRSF10B">https://www.genecards.org/cgi-bin/carddisp.pl?gene=TNFRSF10B</a>       |
| PEPD         | Peptidase D                                                         | Protein Coding    | 46 | GC19M033386 | 16.21912 | <a href="https://www.genecards.org/cgi-bin/carddisp.pl?gene=PEPD">https://www.genecards.org/cgi-bin/carddisp.pl?gene=PEPD</a>                 |
| CAMTA1       | Calmodulin Binding Transcription Activator 1                        | Protein Coding    | 41 | GC01P006806 | 16.20734 | <a href="https://www.genecards.org/cgi-bin/carddisp.pl?gene=CAMTA1">https://www.genecards.org/cgi-bin/carddisp.pl?gene=CAMTA1</a>             |
| CHKA         | Choline Kinase Alpha                                                | Protein Coding    | 42 | GC11M068052 | 16.20527 | <a href="https://www.genecards.org/cgi-bin/carddisp.pl?gene=CHKA">https://www.genecards.org/cgi-bin/carddisp.pl?gene=CHKA</a>                 |
| DAO          | D-Amino Acid Oxidase                                                | Protein Coding    | 45 | GC12P108859 | 16.20326 | <a href="https://www.genecards.org/cgi-bin/carddisp.pl?gene=DAO">https://www.genecards.org/cgi-bin/carddisp.pl?gene=DAO</a>                   |
| LOC110806262 | Solute Carrier Family 6 Member 4 Gene Promoter                      | Biological Region | 1  | GC17P030235 | 16.19947 | <a href="https://www.genecards.org/cgi-bin/carddisp.pl?gene=LOC110806262">https://www.genecards.org/cgi-bin/carddisp.pl?gene=LOC110806262</a> |
| ATP1A3       | ATPase Na <sup>+</sup> /K <sup>+</sup> Transporting Subunit Alpha 3 | Protein Coding    | 48 | GC19M041966 | 16.18552 | <a href="https://www.genecards.org/cgi-bin/carddisp.pl?gene=ATP1A3">https://www.genecards.org/cgi-bin/carddisp.pl?gene=ATP1A3</a>             |
| GNB4         | G Protein Subunit Beta 4                                            | Protein Coding    | 43 | GC03M179397 | 16.16672 | <a href="https://www.genecards.org/cgi-bin/carddisp.pl?gene=GNB4">https://www.genecards.org/cgi-bin/carddisp.pl?gene=GNB4</a>                 |
| HDAC8        | Histone Deacetylase 8                                               | Protein Coding    | 48 | GC0XM072329 | 16.14522 | <a href="https://www.genecards.org/cgi-bin/carddisp.pl?gene=HDAC8">https://www.genecards.org/cgi-bin/carddisp.pl?gene=HDAC8</a>               |
| BBS2         | Bardet-Biedl Syndrome 2 Activity                                    | Protein Coding    | 42 | GC16M056467 | 16.13379 | <a href="https://www.genecards.org/cgi-bin/carddisp.pl?gene=BBS2">https://www.genecards.org/cgi-bin/carddisp.pl?gene=BBS2</a>                 |
| ADNP         | Dependent Neuroprotector Homeobox                                   | Protein Coding    | 43 | GC20M050888 | 16.12299 | <a href="https://www.genecards.org/cgi-bin/carddisp.pl?gene=ADNP">https://www.genecards.org/cgi-bin/carddisp.pl?gene=ADNP</a>                 |
| FOXO1        | Forkhead Box O1                                                     | Protein Coding    | 48 | GC13M040555 | 16.10978 | <a href="https://www.genecards.org/cgi-bin/carddisp.pl?gene=FOXO1">https://www.genecards.org/cgi-bin/carddisp.pl?gene=FOXO1</a>               |
| FHIT         | Fragile Histidine Triad Diadenosine Triphosphatase                  | Protein Coding    | 45 | GC03M059747 | 16.10194 | <a href="https://www.genecards.org/cgi-bin/carddisp.pl?gene=FHIT">https://www.genecards.org/cgi-bin/carddisp.pl?gene=FHIT</a>                 |
| PLCG1        | Phospholipase C Gamma 1                                             | Protein Coding    | 49 | GC20P041136 | 16.09266 | <a href="https://www.genecards.org/cgi-bin/carddisp.pl?gene=PLCG1">https://www.genecards.org/cgi-bin/carddisp.pl?gene=PLCG1</a>               |
| IRF8         | Interferon Regulatory Factor 8                                      | Protein Coding    | 47 | GC16P085898 | 16.08925 | <a href="https://www.genecards.org/cgi-bin/carddisp.pl?gene=IRF8">https://www.genecards.org/cgi-bin/carddisp.pl?gene=IRF8</a>                 |



|          |                                                              |                |    |             |          |                                                                                                                                       |
|----------|--------------------------------------------------------------|----------------|----|-------------|----------|---------------------------------------------------------------------------------------------------------------------------------------|
| DYSF     | Dysferlin                                                    | Protein Coding | 44 | GC02P071453 | 16.0834  | <a href="https://www.genecards.org/cgi-bin/carddisp.pl?gene=DYSF">https://www.genecards.org/cgi-bin/carddisp.pl?gene=DYSF</a>         |
| ANGPT1   | Angiopoietin 1                                               | Protein Coding | 46 | GC08M107246 | 16.08221 | <a href="https://www.genecards.org/cgi-bin/carddisp.pl?gene=ANGPT1">https://www.genecards.org/cgi-bin/carddisp.pl?gene=ANGPT1</a>     |
| OGG1     | 8-Oxoguanine DNA Glycosylase                                 | Protein Coding | 47 | GC03P009751 | 16.08128 | <a href="https://www.genecards.org/cgi-bin/carddisp.pl?gene=OGG1">https://www.genecards.org/cgi-bin/carddisp.pl?gene=OGG1</a>         |
| RNASEH2B | Ribonuclease H2 Subunit B                                    | Protein Coding | 37 | GC13P050909 | 16.06469 | <a href="https://www.genecards.org/cgi-bin/carddisp.pl?gene=RNASEH2B">https://www.genecards.org/cgi-bin/carddisp.pl?gene=RNASEH2B</a> |
| LTBP3    | Latent Transforming Growth Factor Beta Binding Protein 3     | Protein Coding | 42 | GC11M065538 | 16.06443 | <a href="https://www.genecards.org/cgi-bin/carddisp.pl?gene=LTBP3">https://www.genecards.org/cgi-bin/carddisp.pl?gene=LTBP3</a>       |
| SLC39A8  | Solute Carrier Family 39 Member 8                            | Protein Coding | 44 | GC04M102252 | 16.0611  | <a href="https://www.genecards.org/cgi-bin/carddisp.pl?gene=SLC39A8">https://www.genecards.org/cgi-bin/carddisp.pl?gene=SLC39A8</a>   |
| NDUFA10  | NADH:Ubiquinone Oxidoreductase Subunit A10                   | Protein Coding | 45 | GC02M239893 | 16.05857 | <a href="https://www.genecards.org/cgi-bin/carddisp.pl?gene=NDUFA10">https://www.genecards.org/cgi-bin/carddisp.pl?gene=NDUFA10</a>   |
| BBS7     | Bardet-Biedl Syndrome 7                                      | Protein Coding | 38 | GC04M121824 | 16.05673 | <a href="https://www.genecards.org/cgi-bin/carddisp.pl?gene=BBS7">https://www.genecards.org/cgi-bin/carddisp.pl?gene=BBS7</a>         |
| GHRH     | Growth Hormone Releasing Hormone                             | Protein Coding | 40 | GC20M037251 | 16.04934 | <a href="https://www.genecards.org/cgi-bin/carddisp.pl?gene=GHRH">https://www.genecards.org/cgi-bin/carddisp.pl?gene=GHRH</a>         |
| APOA4    | Apolipoprotein A4                                            | Protein Coding | 43 | GC11M116820 | 16.04388 | <a href="https://www.genecards.org/cgi-bin/carddisp.pl?gene=APOA4">https://www.genecards.org/cgi-bin/carddisp.pl?gene=APOA4</a>       |
| BAK1     | BCL2 Antagonist/Killer 1                                     | Protein Coding | 45 | GC06M033572 | 16.03828 | <a href="https://www.genecards.org/cgi-bin/carddisp.pl?gene=BAK1">https://www.genecards.org/cgi-bin/carddisp.pl?gene=BAK1</a>         |
| ERCC8    | ERCC Excision Repair 8, CSA Ubiquitin Ligase Complex Subunit | Protein Coding | 43 | GC05M060874 | 16.02978 | <a href="https://www.genecards.org/cgi-bin/carddisp.pl?gene=ERCC8">https://www.genecards.org/cgi-bin/carddisp.pl?gene=ERCC8</a>       |
| TP63     | Tumor Protein P63                                            | Protein Coding | 49 | GC03P189598 | 16.01756 | <a href="https://www.genecards.org/cgi-bin/carddisp.pl?gene=TP63">https://www.genecards.org/cgi-bin/carddisp.pl?gene=TP63</a>         |
| SNAI2    | Snail Family Transcriptional Repressor 2                     | Protein Coding | 45 | GC08M048917 | 16.01589 | <a href="https://www.genecards.org/cgi-bin/carddisp.pl?gene=SNAI2">https://www.genecards.org/cgi-bin/carddisp.pl?gene=SNAI2</a>       |
| SELENON  | Selenoprotein N                                              | Protein Coding | 33 | GC01P025800 | 16.00738 | <a href="https://www.genecards.org/cgi-bin/carddisp.pl?gene=SELENON">https://www.genecards.org/cgi-bin/carddisp.pl?gene=SELENON</a>   |
| JAK3     | Janus Kinase 3                                               | Protein Coding | 52 | GC19M017824 | 16.00489 | <a href="https://www.genecards.org/cgi-bin/carddisp.pl?gene=JAK3">https://www.genecards.org/cgi-bin/carddisp.pl?gene=JAK3</a>         |
| CNTNAP2  | Contactin Associated Protein 2                               | Protein Coding | 44 | GC07P146116 | 16.00147 | <a href="https://www.genecards.org/cgi-bin/carddisp.pl?gene=CNTNAP2">https://www.genecards.org/cgi-bin/carddisp.pl?gene=CNTNAP2</a>   |
| FHL1     | Four And A Half LIM Domains 1                                | Protein Coding | 47 | GC0XP136146 | 15.99871 | <a href="https://www.genecards.org/cgi-bin/carddisp.pl?gene=FHL1">https://www.genecards.org/cgi-bin/carddisp.pl?gene=FHL1</a>         |
| WRAP53   | WD Repeat Containing Antisense To TP53                       | Protein Coding | 41 | GC17P009114 | 15.99333 | <a href="https://www.genecards.org/cgi-bin/carddisp.pl?gene=WRAP53">https://www.genecards.org/cgi-bin/carddisp.pl?gene=WRAP53</a>     |

|         |                                                           |                |    |             |          |                                                                                                                                     |
|---------|-----------------------------------------------------------|----------------|----|-------------|----------|-------------------------------------------------------------------------------------------------------------------------------------|
| ABCG1   | ATP Binding Cassette Subfamily G Member 1                 | Protein Coding | 44 | GC21P042199 | 15.96082 | <a href="https://www.genecards.org/cgi-bin/carddisp.pl?gene=ABCG1">https://www.genecards.org/cgi-bin/carddisp.pl?gene=ABCG1</a>     |
| M6PR    | Mannose-6-Phosphate Receptor, Cation Dependent Fatty Acid | Protein Coding | 44 | GC12M008969 | 15.95886 | <a href="https://www.genecards.org/cgi-bin/carddisp.pl?gene=M6PR">https://www.genecards.org/cgi-bin/carddisp.pl?gene=M6PR</a>       |
| FABP5P3 | Binding Protein 5 Pseudogene 3                            | Pseudogene     | 19 | GC07P152436 | 15.95772 | <a href="https://www.genecards.org/cgi-bin/carddisp.pl?gene=FABP5P3">https://www.genecards.org/cgi-bin/carddisp.pl?gene=FABP5P3</a> |
| SETD2   | SET Domain Containing 2, Histone Lysine Methyltransferase | Protein Coding | 47 | GC03M047033 | 15.9547  | <a href="https://www.genecards.org/cgi-bin/carddisp.pl?gene=SETD2">https://www.genecards.org/cgi-bin/carddisp.pl?gene=SETD2</a>     |
| GDF15   | Growth Differentiation Factor 15                          | Protein Coding | 43 | GC19P026656 | 15.94497 | <a href="https://www.genecards.org/cgi-bin/carddisp.pl?gene=GDF15">https://www.genecards.org/cgi-bin/carddisp.pl?gene=GDF15</a>     |
| NDUFB11 | NADH:Ubiquinone Oxidoreductase Subunit B11                | Protein Coding | 40 | GC0XM047142 | 15.94305 | <a href="https://www.genecards.org/cgi-bin/carddisp.pl?gene=NDUFB11">https://www.genecards.org/cgi-bin/carddisp.pl?gene=NDUFB11</a> |
| AKR1C2  | Aldo-Keto Reductase Family 1 Member C2                    | Protein Coding | 47 | GC10M004987 | 15.9403  | <a href="https://www.genecards.org/cgi-bin/carddisp.pl?gene=AKR1C2">https://www.genecards.org/cgi-bin/carddisp.pl?gene=AKR1C2</a>   |
| PTH1R   | Parathyroid Hormone 1 Receptor                            | Protein Coding | 50 | GC03P046877 | 15.93879 | <a href="https://www.genecards.org/cgi-bin/carddisp.pl?gene=PTH1R">https://www.genecards.org/cgi-bin/carddisp.pl?gene=PTH1R</a>     |
| MT-TF   | Mitochondrially Encoded TRNA-Phe (UUU/C)                  | RNA Gene       | 14 | GCMTP000003 | 15.93401 | <a href="https://www.genecards.org/cgi-bin/carddisp.pl?gene=MT-TF">https://www.genecards.org/cgi-bin/carddisp.pl?gene=MT-TF</a>     |
| POR     | Cytochrome P450 Oxidoreductase                            | Protein Coding | 50 | GC07P075899 | 15.924   | <a href="https://www.genecards.org/cgi-bin/carddisp.pl?gene=POR">https://www.genecards.org/cgi-bin/carddisp.pl?gene=POR</a>         |
| MUTYH   | MutY DNA Glycosylase                                      | Protein Coding | 45 | GC01M045329 | 15.91155 | <a href="https://www.genecards.org/cgi-bin/carddisp.pl?gene=MUTYH">https://www.genecards.org/cgi-bin/carddisp.pl?gene=MUTYH</a>     |
| CRX     | Cone-Rod Homeobox                                         | Protein Coding | 44 | GC19P047819 | 15.90081 | <a href="https://www.genecards.org/cgi-bin/carddisp.pl?gene=CRX">https://www.genecards.org/cgi-bin/carddisp.pl?gene=CRX</a>         |
| CD55    | CD55 Molecule (Cromer Blood Group)                        | Protein Coding | 48 | GC01P207321 | 15.89428 | <a href="https://www.genecards.org/cgi-bin/carddisp.pl?gene=CD55">https://www.genecards.org/cgi-bin/carddisp.pl?gene=CD55</a>       |
| GDF6    | Growth Differentiation Factor 6                           | Protein Coding | 43 | GC08M096142 | 15.89301 | <a href="https://www.genecards.org/cgi-bin/carddisp.pl?gene=GDF6">https://www.genecards.org/cgi-bin/carddisp.pl?gene=GDF6</a>       |
| NDUFB8  | NADH:Ubiquinone Oxidoreductase Subunit B8                 | Protein Coding | 43 | GC10M100523 | 15.89291 | <a href="https://www.genecards.org/cgi-bin/carddisp.pl?gene=NDUFB8">https://www.genecards.org/cgi-bin/carddisp.pl?gene=NDUFB8</a>   |
| TRIM32  | Tripartite Motif Containing 32                            | Protein Coding | 44 | GC09P116687 | 15.89095 | <a href="https://www.genecards.org/cgi-bin/carddisp.pl?gene=TRIM32">https://www.genecards.org/cgi-bin/carddisp.pl?gene=TRIM32</a>   |

|          |                                                       |                |    |             |          |                                                                                                                                       |
|----------|-------------------------------------------------------|----------------|----|-------------|----------|---------------------------------------------------------------------------------------------------------------------------------------|
| ITGA4    | Integrin Subunit Alpha 4                              | Protein Coding | 49 | GC02P181456 | 15.87939 | <a href="https://www.genecards.org/cgi-bin/carddisp.pl?gene=ITGA4">https://www.genecards.org/cgi-bin/carddisp.pl?gene=ITGA4</a>       |
| SPTLC2   | Serine Palmitoyltransferase Long Chain Base Subunit 2 | Protein Coding | 48 | GC14M077505 | 15.87024 | <a href="https://www.genecards.org/cgi-bin/carddisp.pl?gene=SPTLC2">https://www.genecards.org/cgi-bin/carddisp.pl?gene=SPTLC2</a>     |
| BCR      | BCR Activator Of RhoGEF And GTPase                    | Protein Coding | 52 | GC22P023179 | 15.86954 | <a href="https://www.genecards.org/cgi-bin/carddisp.pl?gene=BCR">https://www.genecards.org/cgi-bin/carddisp.pl?gene=BCR</a>           |
| CNTNAP1  | Contactin Associated Protein 1                        | Protein Coding | 43 | GC17P042680 | 15.86062 | <a href="https://www.genecards.org/cgi-bin/carddisp.pl?gene=CNTNAP1">https://www.genecards.org/cgi-bin/carddisp.pl?gene=CNTNAP1</a>   |
| CDC73    | Cell Division Cycle 73                                | Protein Coding | 45 | GC01P193121 | 15.85806 | <a href="https://www.genecards.org/cgi-bin/carddisp.pl?gene=CDC73">https://www.genecards.org/cgi-bin/carddisp.pl?gene=CDC73</a>       |
| SNCB     | Synuclein Beta                                        | Protein Coding | 44 | GC05M176620 | 15.85333 | <a href="https://www.genecards.org/cgi-bin/carddisp.pl?gene=SNCB">https://www.genecards.org/cgi-bin/carddisp.pl?gene=SNCB</a>         |
| MIR320A  | MicroRNA 320a                                         | RNA Gene       | 19 | GC08M022249 | 15.84664 | <a href="https://www.genecards.org/cgi-bin/carddisp.pl?gene=MIR320A">https://www.genecards.org/cgi-bin/carddisp.pl?gene=MIR320A</a>   |
| TYK2     | Tyrosine Kinase 2                                     | Protein Coding | 53 | GC19M010350 | 15.83986 | <a href="https://www.genecards.org/cgi-bin/carddisp.pl?gene=TYK2">https://www.genecards.org/cgi-bin/carddisp.pl?gene=TYK2</a>         |
| ITGA3    | Integrin Subunit Alpha 3                              | Protein Coding | 47 | GC17P050055 | 15.83595 | <a href="https://www.genecards.org/cgi-bin/carddisp.pl?gene=ITGA3">https://www.genecards.org/cgi-bin/carddisp.pl?gene=ITGA3</a>       |
| FLI1     | Fli-1 Proto-Oncogene, ETS Transcription Factor        | Protein Coding | 49 | GC11P128686 | 15.80927 | <a href="https://www.genecards.org/cgi-bin/carddisp.pl?gene=FLI1">https://www.genecards.org/cgi-bin/carddisp.pl?gene=FLI1</a>         |
| TGIF1    | TGFB Induced Factor Homeobox 1                        | Protein Coding | 47 | GC18P003411 | 15.80026 | <a href="https://www.genecards.org/cgi-bin/carddisp.pl?gene=TGIF1">https://www.genecards.org/cgi-bin/carddisp.pl?gene=TGIF1</a>       |
| MIRLET7B | MicroRNA Let-7b                                       | RNA Gene       | 20 | GC22P046119 | 15.79724 | <a href="https://www.genecards.org/cgi-bin/carddisp.pl?gene=MIRLET7B">https://www.genecards.org/cgi-bin/carddisp.pl?gene=MIRLET7B</a> |
| HTRA1    | HtrA Serine Peptidase 1 OPA1                          | Protein Coding | 44 | GC10P122461 | 15.78774 | <a href="https://www.genecards.org/cgi-bin/carddisp.pl?gene=HTRA1">https://www.genecards.org/cgi-bin/carddisp.pl?gene=HTRA1</a>       |
| OPA1     | Mitochondrial Dynamin Like GTPase                     | Protein Coding | 45 | GC03P193594 | 15.78479 | <a href="https://www.genecards.org/cgi-bin/carddisp.pl?gene=OPA1">https://www.genecards.org/cgi-bin/carddisp.pl?gene=OPA1</a>         |
| UBE3A    | Ubiquitin Protein Ligase E3A                          | Protein Coding | 48 | GC15M025333 | 15.76962 | <a href="https://www.genecards.org/cgi-bin/carddisp.pl?gene=UBE3A">https://www.genecards.org/cgi-bin/carddisp.pl?gene=UBE3A</a>       |
| DICER1   | Dicer 1, Ribonuclease III                             | Protein Coding | 48 | GC14M095086 | 15.76591 | <a href="https://www.genecards.org/cgi-bin/carddisp.pl?gene=DICER1">https://www.genecards.org/cgi-bin/carddisp.pl?gene=DICER1</a>     |
| PCCA     | Propionyl-CoA Carboxylase Subunit Alpha               | Protein Coding | 48 | GC13P100089 | 15.75922 | <a href="https://www.genecards.org/cgi-bin/carddisp.pl?gene=PCCA">https://www.genecards.org/cgi-bin/carddisp.pl?gene=PCCA</a>         |
| PVALB    | Parvalbumin                                           | Protein Coding | 40 | GC22M036800 | 15.75431 | <a href="https://www.genecards.org/cgi-bin/carddisp.pl?gene=PVALB">https://www.genecards.org/cgi-bin/carddisp.pl?gene=PVALB</a>       |
| MYOT     | Myotilin                                              | Protein Coding | 42 | GC05P137867 | 15.75248 | <a href="https://www.genecards.org/cgi-bin/carddisp.pl?gene=MYOT">https://www.genecards.org/cgi-bin/carddisp.pl?gene=MYOT</a>         |
| KEAP1    | Kelch Like ECH Associated Protein 1                   | Protein Coding | 48 | GC19M010486 | 15.74058 | <a href="https://www.genecards.org/cgi-bin/carddisp.pl?gene=KEAP1">https://www.genecards.org/cgi-bin/carddisp.pl?gene=KEAP1</a>       |

|        |                                                          |                   |    |                 |          |                                                                                                                                   |
|--------|----------------------------------------------------------|-------------------|----|-----------------|----------|-----------------------------------------------------------------------------------------------------------------------------------|
| IRF3   | Interferon<br>Regulatory<br>Factor 3                     | Protein<br>Coding | 47 | GC19M049<br>659 | 15.73547 | <a href="https://www.genecards.org/cgi-bin/carddisp.pl?gene=IRF3">https://www.genecards.org/cgi-bin/carddisp.pl?gene=IRF3</a>     |
| CD80   | CD80 Molecule                                            | Protein<br>Coding | 42 | GC03M119<br>524 | 15.73169 | <a href="https://www.genecards.org/cgi-bin/carddisp.pl?gene=CD80">https://www.genecards.org/cgi-bin/carddisp.pl?gene=CD80</a>     |
| ANXA2  | Annexin A2                                               | Protein<br>Coding | 49 | GC15M060<br>347 | 15.72817 | <a href="https://www.genecards.org/cgi-bin/carddisp.pl?gene=ANXA2">https://www.genecards.org/cgi-bin/carddisp.pl?gene=ANXA2</a>   |
| CASP10 | Caspase 10                                               | Protein<br>Coding | 48 | GC02P2011<br>82 | 15.72532 | <a href="https://www.genecards.org/cgi-bin/carddisp.pl?gene=CASP10">https://www.genecards.org/cgi-bin/carddisp.pl?gene=CASP10</a> |
| CLCNKB | Chloride<br>Voltage-Gated<br>Channel Kb                  | Protein<br>Coding | 44 | GC01P0160<br>43 | 15.72475 | <a href="https://www.genecards.org/cgi-bin/carddisp.pl?gene=CLCNKB">https://www.genecards.org/cgi-bin/carddisp.pl?gene=CLCNKB</a> |
| UGT2B7 | UDP<br>Glucuronosyltra<br>nsferase Family<br>2 Member B7 | Protein<br>Coding | 45 | GC04P0690<br>51 | 15.71338 | <a href="https://www.genecards.org/cgi-bin/carddisp.pl?gene=UGT2B7">https://www.genecards.org/cgi-bin/carddisp.pl?gene=UGT2B7</a> |
| ALOX12 | Arachidonate<br>12-<br>Lipoxygenase,<br>12S Type         | Protein<br>Coding | 44 | GC17P0069<br>95 | 15.71093 | <a href="https://www.genecards.org/cgi-bin/carddisp.pl?gene=ALOX12">https://www.genecards.org/cgi-bin/carddisp.pl?gene=ALOX12</a> |
| AOX1   | Aldehyde<br>Oxidase 1                                    | Protein<br>Coding | 45 | GC02P2005<br>85 | 15.70968 | <a href="https://www.genecards.org/cgi-bin/carddisp.pl?gene=AOX1">https://www.genecards.org/cgi-bin/carddisp.pl?gene=AOX1</a>     |
| SATB2  | SATB<br>Homeobox 2<br>NADH:Ubiquin                       | Protein<br>Coding | 45 | GC02M199<br>269 | 15.68483 | <a href="https://www.genecards.org/cgi-bin/carddisp.pl?gene=SATB2">https://www.genecards.org/cgi-bin/carddisp.pl?gene=SATB2</a>   |
| NDUFS6 | one<br>Oxidoreductase<br>Subunit S6                      | Protein<br>Coding | 45 | GC05P0018<br>01 | 15.68081 | <a href="https://www.genecards.org/cgi-bin/carddisp.pl?gene=NDUFS6">https://www.genecards.org/cgi-bin/carddisp.pl?gene=NDUFS6</a> |
| GOLM1  | Golgi<br>Membrane<br>Protein 1                           | Protein<br>Coding | 39 | GC09M086<br>026 | 15.67516 | <a href="https://www.genecards.org/cgi-bin/carddisp.pl?gene=GOLM1">https://www.genecards.org/cgi-bin/carddisp.pl?gene=GOLM1</a>   |
| NGFR   | Nerve Growth<br>Factor<br>Receptor                       | Protein<br>Coding | 46 | GC17P0494<br>95 | 15.67087 | <a href="https://www.genecards.org/cgi-bin/carddisp.pl?gene=NGFR">https://www.genecards.org/cgi-bin/carddisp.pl?gene=NGFR</a>     |
| ENO1   | Enolase 1                                                | Protein<br>Coding | 48 | GC01M008<br>861 | 15.64779 | <a href="https://www.genecards.org/cgi-bin/carddisp.pl?gene=ENO1">https://www.genecards.org/cgi-bin/carddisp.pl?gene=ENO1</a>     |
| MATR3  | Matrin 3                                                 | Protein<br>Coding | 43 | GC05P1392<br>74 | 15.64753 | <a href="https://www.genecards.org/cgi-bin/carddisp.pl?gene=MATR3">https://www.genecards.org/cgi-bin/carddisp.pl?gene=MATR3</a>   |
| CASP7  | Caspase 7                                                | Protein<br>Coding | 50 | GC10P1136<br>79 | 15.64046 | <a href="https://www.genecards.org/cgi-bin/carddisp.pl?gene=CASP7">https://www.genecards.org/cgi-bin/carddisp.pl?gene=CASP7</a>   |
| BHMT   | Betaine--<br>Homocysteine<br>S-<br>Methyltransfera<br>se | Protein<br>Coding | 43 | GC05P0791<br>11 | 15.63945 | <a href="https://www.genecards.org/cgi-bin/carddisp.pl?gene=BHMT">https://www.genecards.org/cgi-bin/carddisp.pl?gene=BHMT</a>     |
| ATP1A1 | ATPase<br>Na+/K+<br>Transporting<br>Subunit Alpha<br>1   | Protein<br>Coding | 51 | GC01P1163<br>72 | 15.6326  | <a href="https://www.genecards.org/cgi-bin/carddisp.pl?gene=ATP1A1">https://www.genecards.org/cgi-bin/carddisp.pl?gene=ATP1A1</a> |
| PCCB   | Propionyl-CoA<br>Carboxylase<br>Subunit Beta             | Protein<br>Coding | 48 | GC03P1362<br>50 | 15.62269 | <a href="https://www.genecards.org/cgi-bin/carddisp.pl?gene=PCCB">https://www.genecards.org/cgi-bin/carddisp.pl?gene=PCCB</a>     |
| IARS2  | Isoleucyl-TRNA<br>Synthetase 2,<br>Mitochondrial         | Protein<br>Coding | 42 | GC01P2200<br>94 | 15.61557 | <a href="https://www.genecards.org/cgi-bin/carddisp.pl?gene=IARS2">https://www.genecards.org/cgi-bin/carddisp.pl?gene=IARS2</a>   |

|              |                                                       |                   |    |             |          |                                                                                                                                               |
|--------------|-------------------------------------------------------|-------------------|----|-------------|----------|-----------------------------------------------------------------------------------------------------------------------------------------------|
| XRCC3        | X-Ray Repair Cross Complementing 3                    | Protein Coding    | 43 | GC14M103697 | 15.61494 | <a href="https://www.genecards.org/cgi-bin/carddisp.pl?gene=XRCC3">https://www.genecards.org/cgi-bin/carddisp.pl?gene=XRCC3</a>               |
| ZEB1         | Zinc Finger E-Box Binding Homeobox 1 VAMP             | Protein Coding    | 49 | GC10P031318 | 15.61462 | <a href="https://www.genecards.org/cgi-bin/carddisp.pl?gene=ZEB1">https://www.genecards.org/cgi-bin/carddisp.pl?gene=ZEB1</a>                 |
| VAPB         | Associated Protein B And C                            | Protein Coding    | 46 | GC20P058389 | 15.61244 | <a href="https://www.genecards.org/cgi-bin/carddisp.pl?gene=VAPB">https://www.genecards.org/cgi-bin/carddisp.pl?gene=VAPB</a>                 |
| FCGR3A       | Fc Fragment Of IgG Receptor IIIa                      | Protein Coding    | 45 | GC01M161541 | 15.60458 | <a href="https://www.genecards.org/cgi-bin/carddisp.pl?gene=FCGR3A">https://www.genecards.org/cgi-bin/carddisp.pl?gene=FCGR3A</a>             |
| MIR149       | MicroRNA 149                                          | RNA Gene          | 20 | GC02P240456 | 15.60336 | <a href="https://www.genecards.org/cgi-bin/carddisp.pl?gene=MIR149">https://www.genecards.org/cgi-bin/carddisp.pl?gene=MIR149</a>             |
| CHRNA7       | Cholinergic Receptor Nicotinic Alpha 7 Subunit        | Protein Coding    | 46 | GC15P031923 | 15.59157 | <a href="https://www.genecards.org/cgi-bin/carddisp.pl?gene=CHRNA7">https://www.genecards.org/cgi-bin/carddisp.pl?gene=CHRNA7</a>             |
| LIPG         | Lipase G, Endothelial Type                            | Protein Coding    | 44 | GC18P049560 | 15.5748  | <a href="https://www.genecards.org/cgi-bin/carddisp.pl?gene=LIPG">https://www.genecards.org/cgi-bin/carddisp.pl?gene=LIPG</a>                 |
| MIR424       | MicroRNA 424                                          | RNA Gene          | 16 | GC0XM134651 | 15.56528 | <a href="https://www.genecards.org/cgi-bin/carddisp.pl?gene=MIR424">https://www.genecards.org/cgi-bin/carddisp.pl?gene=MIR424</a>             |
| HSPA1A       | Heat Shock Protein Family A (Hsp70) Member 1A         | Protein Coding    | 44 | GC06P055219 | 15.56333 | <a href="https://www.genecards.org/cgi-bin/carddisp.pl?gene=HSPA1A">https://www.genecards.org/cgi-bin/carddisp.pl?gene=HSPA1A</a>             |
| MERTK        | MER Proto-Oncogene, Tyrosine Kinase                   | Protein Coding    | 51 | GC02P111898 | 15.56089 | <a href="https://www.genecards.org/cgi-bin/carddisp.pl?gene=MERTK">https://www.genecards.org/cgi-bin/carddisp.pl?gene=MERTK</a>               |
| HDAC6        | Histone Deacetylase 6                                 | Protein Coding    | 52 | GC0XP048801 | 15.55583 | <a href="https://www.genecards.org/cgi-bin/carddisp.pl?gene=HDAC6">https://www.genecards.org/cgi-bin/carddisp.pl?gene=HDAC6</a>               |
| LOC111674475 | CFTR Intron 11 Enhancer                               | Biological Region | 2  | GC07P117587 | 15.54835 | <a href="https://www.genecards.org/cgi-bin/carddisp.pl?gene=LOC111674475">https://www.genecards.org/cgi-bin/carddisp.pl?gene=LOC111674475</a> |
| GABRD        | Gamma-Aminobutyric Acid Type A Receptor Subunit Delta | Protein Coding    | 46 | GC01P002019 | 15.53534 | <a href="https://www.genecards.org/cgi-bin/carddisp.pl?gene=GABRD">https://www.genecards.org/cgi-bin/carddisp.pl?gene=GABRD</a>               |
| CCL20        | C-C Motif Chemokine Ligand 20                         | Protein Coding    | 44 | GC02P227814 | 15.53394 | <a href="https://www.genecards.org/cgi-bin/carddisp.pl?gene=CCL20">https://www.genecards.org/cgi-bin/carddisp.pl?gene=CCL20</a>               |
| SFTPD        | Surfactant Protein D                                  | Protein Coding    | 44 | GC10M079937 | 15.52863 | <a href="https://www.genecards.org/cgi-bin/carddisp.pl?gene=SFTPD">https://www.genecards.org/cgi-bin/carddisp.pl?gene=SFTPD</a>               |
| RNASEH2C     | Ribonuclease H2 Subunit C                             | Protein Coding    | 40 | GC11M065714 | 15.52587 | <a href="https://www.genecards.org/cgi-bin/carddisp.pl?gene=RNASEH2C">https://www.genecards.org/cgi-bin/carddisp.pl?gene=RNASEH2C</a>         |
| ANKK1        | Ankyrin Repeat And Kinase Domain Containing 1         | Protein Coding    | 38 | GC11P113387 | 15.52338 | <a href="https://www.genecards.org/cgi-bin/carddisp.pl?gene=ANKK1">https://www.genecards.org/cgi-bin/carddisp.pl?gene=ANKK1</a>               |
| TKFC         | Triokinase And FMN Cyclase                            | Protein Coding    | 40 | GC11P061334 | 15.50475 | <a href="https://www.genecards.org/cgi-bin/carddisp.pl?gene=TKFC">https://www.genecards.org/cgi-bin/carddisp.pl?gene=TKFC</a>                 |

|          |                                                                                 |                |    |             |          |                                                                                                                                       |
|----------|---------------------------------------------------------------------------------|----------------|----|-------------|----------|---------------------------------------------------------------------------------------------------------------------------------------|
| RNASEH2A | Ribonuclease H2 Subunit A                                                       | Protein Coding | 44 | GC19P012896 | 15.49743 | <a href="https://www.genecards.org/cgi-bin/carddisp.pl?gene=RNASEH2A">https://www.genecards.org/cgi-bin/carddisp.pl?gene=RNASEH2A</a> |
| SAMHD1   | SAM And HD Domain Containing Deoxynucleoside Triphosphate Triphosphohydrolase 1 | Protein Coding | 43 | GC20M036890 | 15.49395 | <a href="https://www.genecards.org/cgi-bin/carddisp.pl?gene=SAMHD1">https://www.genecards.org/cgi-bin/carddisp.pl?gene=SAMHD1</a>     |
| P2RY12   | Purinergic Receptor P2Y12                                                       | Protein Coding | 49 | GC03M151336 | 15.48017 | <a href="https://www.genecards.org/cgi-bin/carddisp.pl?gene=P2RY12">https://www.genecards.org/cgi-bin/carddisp.pl?gene=P2RY12</a>     |
| NDUFB3   | NADH:Ubiquinone Oxidoreductase Subunit B3                                       | Protein Coding | 43 | GC02P201071 | 15.47583 | <a href="https://www.genecards.org/cgi-bin/carddisp.pl?gene=NDUFB3">https://www.genecards.org/cgi-bin/carddisp.pl?gene=NDUFB3</a>     |
| SPR      | Sepiapterin Reductase                                                           | Protein Coding | 51 | GC02P072850 | 15.45502 | <a href="https://www.genecards.org/cgi-bin/carddisp.pl?gene=SPR">https://www.genecards.org/cgi-bin/carddisp.pl?gene=SPR</a>           |
| TGM2     | Transglutaminase 2                                                              | Protein Coding | 48 | GC20M038127 | 15.44772 | <a href="https://www.genecards.org/cgi-bin/carddisp.pl?gene=TGM2">https://www.genecards.org/cgi-bin/carddisp.pl?gene=TGM2</a>         |
| LAMA2    | Laminin Subunit Alpha 2                                                         | Protein Coding | 44 | GC06P128863 | 15.4388  | <a href="https://www.genecards.org/cgi-bin/carddisp.pl?gene=LAMA2">https://www.genecards.org/cgi-bin/carddisp.pl?gene=LAMA2</a>       |
| IL11     | Interleukin 11                                                                  | Protein Coding | 41 | GC19M055364 | 15.43434 | <a href="https://www.genecards.org/cgi-bin/carddisp.pl?gene=IL11">https://www.genecards.org/cgi-bin/carddisp.pl?gene=IL11</a>         |
| ACOX3    | Acyl-CoA Oxidase 3, Pristanoyl                                                  | Protein Coding | 41 | GC04M008380 | 15.42329 | <a href="https://www.genecards.org/cgi-bin/carddisp.pl?gene=ACOX3">https://www.genecards.org/cgi-bin/carddisp.pl?gene=ACOX3</a>       |
| NKX2-1   | NK2 Homeobox 1                                                                  | Protein Coding | 47 | GC14M036516 | 15.4176  | <a href="https://www.genecards.org/cgi-bin/carddisp.pl?gene=NKX2-1">https://www.genecards.org/cgi-bin/carddisp.pl?gene=NKX2-1</a>     |
| NDUFA12  | NADH:Ubiquinone Oxidoreductase Subunit A12                                      | Protein Coding | 45 | GC12M094898 | 15.39772 | <a href="https://www.genecards.org/cgi-bin/carddisp.pl?gene=NDUFA12">https://www.genecards.org/cgi-bin/carddisp.pl?gene=NDUFA12</a>   |
| STX1A    | Syntaxin 1A                                                                     | Protein Coding | 48 | GC07M073700 | 15.39687 | <a href="https://www.genecards.org/cgi-bin/carddisp.pl?gene=STX1A">https://www.genecards.org/cgi-bin/carddisp.pl?gene=STX1A</a>       |
| DVL1     | Dishevelled Segment Polarity Protein 1                                          | Protein Coding | 48 | GC01M001335 | 15.39504 | <a href="https://www.genecards.org/cgi-bin/carddisp.pl?gene=DVL1">https://www.genecards.org/cgi-bin/carddisp.pl?gene=DVL1</a>         |
| HPGD     | 15-Hydroxyprostaglandin Dehydrogenase                                           | Protein Coding | 48 | GC04M174490 | 15.39483 | <a href="https://www.genecards.org/cgi-bin/carddisp.pl?gene=HPGD">https://www.genecards.org/cgi-bin/carddisp.pl?gene=HPGD</a>         |
| ONECUT1  | One Cut Homeobox 1                                                              | Protein Coding | 41 | GC15M067272 | 15.38384 | <a href="https://www.genecards.org/cgi-bin/carddisp.pl?gene=ONECUT1">https://www.genecards.org/cgi-bin/carddisp.pl?gene=ONECUT1</a>   |
| LIFR     | LIF Receptor Subunit Alpha                                                      | Protein Coding | 47 | GC05M038475 | 15.38278 | <a href="https://www.genecards.org/cgi-bin/carddisp.pl?gene=LIFR">https://www.genecards.org/cgi-bin/carddisp.pl?gene=LIFR</a>         |
| ATRIP    | ATR Interacting Protein                                                         | Protein Coding | 43 | GC03P048449 | 15.37511 | <a href="https://www.genecards.org/cgi-bin/carddisp.pl?gene=ATRIP">https://www.genecards.org/cgi-bin/carddisp.pl?gene=ATRIP</a>       |

|           |                                                                                                |                |    |             |          |                                                                                                                                         |
|-----------|------------------------------------------------------------------------------------------------|----------------|----|-------------|----------|-----------------------------------------------------------------------------------------------------------------------------------------|
| SMARCAL1  | SWI/SNF Related, Matrix Associated, Actin Dependent Regulator Of Chromatin, Subfamily A Like 1 | Protein Coding | 44 | GC02P216412 | 15.37228 | <a href="https://www.genecards.org/cgi-bin/carddisp.pl?gene=SMARCAL1">https://www.genecards.org/cgi-bin/carddisp.pl?gene=SMARCAL1</a>   |
| ISG15     | ISG15 Ubiquitin Like Modifier                                                                  | Protein Coding | 47 | GC01P001001 | 15.36656 | <a href="https://www.genecards.org/cgi-bin/carddisp.pl?gene=ISG15">https://www.genecards.org/cgi-bin/carddisp.pl?gene=ISG15</a>         |
| FANCD2    | FA Complementati on Group D2                                                                   | Protein Coding | 47 | GC03P010026 | 15.36095 | <a href="https://www.genecards.org/cgi-bin/carddisp.pl?gene=FANCD2">https://www.genecards.org/cgi-bin/carddisp.pl?gene=FANCD2</a>       |
| H6PD      | Hexose-6-Phosphate Dehydrogenase /Glucose 1-Dehydrogenase                                      | Protein Coding | 43 | GC01P009234 | 15.35358 | <a href="https://www.genecards.org/cgi-bin/carddisp.pl?gene=H6PD">https://www.genecards.org/cgi-bin/carddisp.pl?gene=H6PD</a>           |
| PROS1     | Protein S                                                                                      | Protein Coding | 48 | GC03M093873 | 15.35192 | <a href="https://www.genecards.org/cgi-bin/carddisp.pl?gene=PROS1">https://www.genecards.org/cgi-bin/carddisp.pl?gene=PROS1</a>         |
| SMAD7     | SMAD Family Member 7                                                                           | Protein Coding | 44 | GC18M048919 | 15.34348 | <a href="https://www.genecards.org/cgi-bin/carddisp.pl?gene=SMAD7">https://www.genecards.org/cgi-bin/carddisp.pl?gene=SMAD7</a>         |
| MGLL      | Monoglyceride Lipase                                                                           | Protein Coding | 46 | GC03M127689 | 15.33552 | <a href="https://www.genecards.org/cgi-bin/carddisp.pl?gene=MGLL">https://www.genecards.org/cgi-bin/carddisp.pl?gene=MGLL</a>           |
| EGR1      | Early Growth Response 1                                                                        | Protein Coding | 44 | GC05P138465 | 15.3355  | <a href="https://www.genecards.org/cgi-bin/carddisp.pl?gene=EGR1">https://www.genecards.org/cgi-bin/carddisp.pl?gene=EGR1</a>           |
| FDFT1     | Farnesyl-Diphosphate Farnesyltransferase 1                                                     | Protein Coding | 46 | GC08P011795 | 15.3271  | <a href="https://www.genecards.org/cgi-bin/carddisp.pl?gene=FDFT1">https://www.genecards.org/cgi-bin/carddisp.pl?gene=FDFT1</a>         |
| ADCYAP1   | Adenylate Cyclase Activating Polypeptide 1                                                     | Protein Coding | 43 | GC18P000895 | 15.32689 | <a href="https://www.genecards.org/cgi-bin/carddisp.pl?gene=ADCYAP1">https://www.genecards.org/cgi-bin/carddisp.pl?gene=ADCYAP1</a>     |
| ETS1      | ETS Proto-Oncogene 1, Transcription Factor                                                     | Protein Coding | 49 | GC11M128458 | 15.3215  | <a href="https://www.genecards.org/cgi-bin/carddisp.pl?gene=ETS1">https://www.genecards.org/cgi-bin/carddisp.pl?gene=ETS1</a>           |
| TNFRSF10A | TNF Receptor Superfamily Member 10a                                                            | Protein Coding | 45 | GC08M023190 | 15.30898 | <a href="https://www.genecards.org/cgi-bin/carddisp.pl?gene=TNFRSF10A">https://www.genecards.org/cgi-bin/carddisp.pl?gene=TNFRSF10A</a> |
| STAT5A    | Signal Transducer And Activator Of Transcription 5A                                            | Protein Coding | 47 | GC17P042287 | 15.30695 | <a href="https://www.genecards.org/cgi-bin/carddisp.pl?gene=STAT5A">https://www.genecards.org/cgi-bin/carddisp.pl?gene=STAT5A</a>       |
| KIAA0319L | KIAA0319 Like                                                                                  | Protein Coding | 37 | GC01M035433 | 15.29306 | <a href="https://www.genecards.org/cgi-bin/carddisp.pl?gene=KIAA0319L">https://www.genecards.org/cgi-bin/carddisp.pl?gene=KIAA0319L</a> |
| DLG4      | Discs Large MAGUK Scaffold Protein 4                                                           | Protein Coding | 48 | GC17M007189 | 15.28131 | <a href="https://www.genecards.org/cgi-bin/carddisp.pl?gene=DLG4">https://www.genecards.org/cgi-bin/carddisp.pl?gene=DLG4</a>           |

|                  |                                                            |                      |    |                 |          |                                                                                                                                               |
|------------------|------------------------------------------------------------|----------------------|----|-----------------|----------|-----------------------------------------------------------------------------------------------------------------------------------------------|
| OXA1L            | OXA1L<br>Mitochondrial<br>Inner<br>Membrane<br>Protein     | Protein<br>Coding    | 40 | GC14P0227<br>66 | 15.26388 | <a href="https://www.genecards.org/cgi-bin/carddisp.pl?gene=OXA1L">https://www.genecards.org/cgi-bin/carddisp.pl?gene=OXA1L</a>               |
| SLC16A2          | Solute Carrier<br>Family 16<br>Member 2                    | Protein<br>Coding    | 46 | GC0XP0744<br>39 | 15.26246 | <a href="https://www.genecards.org/cgi-bin/carddisp.pl?gene=SLC16A2">https://www.genecards.org/cgi-bin/carddisp.pl?gene=SLC16A2</a>           |
| PTK2             | Protein<br>Tyrosine Kinase<br>2                            | Protein<br>Coding    | 48 | GC08M140<br>657 | 15.26065 | <a href="https://www.genecards.org/cgi-bin/carddisp.pl?gene=PTK2">https://www.genecards.org/cgi-bin/carddisp.pl?gene=PTK2</a>                 |
| ABCC1            | ATP Binding<br>Cassette<br>Subfamily C<br>Member 1         | Protein<br>Coding    | 50 | GC16P0159<br>49 | 15.2595  | <a href="https://www.genecards.org/cgi-bin/carddisp.pl?gene=ABCC1">https://www.genecards.org/cgi-bin/carddisp.pl?gene=ABCC1</a>               |
| CSF1R            | Colony<br>Stimulating<br>Factor 1<br>Receptor              | Protein<br>Coding    | 52 | GC05M150<br>053 | 15.25608 | <a href="https://www.genecards.org/cgi-bin/carddisp.pl?gene=CSF1R">https://www.genecards.org/cgi-bin/carddisp.pl?gene=CSF1R</a>               |
| GAD2             | Glutamate<br>Decarboxylase<br>2                            | Protein<br>Coding    | 47 | GC10P0262<br>16 | 15.25606 | <a href="https://www.genecards.org/cgi-bin/carddisp.pl?gene=GAD2">https://www.genecards.org/cgi-bin/carddisp.pl?gene=GAD2</a>                 |
| ARV1             | ARV1<br>Homolog, Fatty<br>Acid<br>Homeostasis<br>Modulator | Protein<br>Coding    | 37 | GC01P2309<br>78 | 15.24654 | <a href="https://www.genecards.org/cgi-bin/carddisp.pl?gene=ARV1">https://www.genecards.org/cgi-bin/carddisp.pl?gene=ARV1</a>                 |
| BMPR1A           | Bone<br>Morphogenetic<br>Protein<br>Receptor Type<br>1A    | Protein<br>Coding    | 51 | GC10P0867<br>56 | 15.24649 | <a href="https://www.genecards.org/cgi-bin/carddisp.pl?gene=BMPR1A">https://www.genecards.org/cgi-bin/carddisp.pl?gene=BMPR1A</a>             |
| TJP1             | Tight Junction<br>Protein 1                                | Protein<br>Coding    | 44 | GC15M029<br>699 | 15.22886 | <a href="https://www.genecards.org/cgi-bin/carddisp.pl?gene=TJP1">https://www.genecards.org/cgi-bin/carddisp.pl?gene=TJP1</a>                 |
| NTF3             | Neurotrophin 3                                             | Protein<br>Coding    | 43 | GC12P0054<br>32 | 15.22458 | <a href="https://www.genecards.org/cgi-bin/carddisp.pl?gene=NTF3">https://www.genecards.org/cgi-bin/carddisp.pl?gene=NTF3</a>                 |
| CTC1             | CST Telomere<br>Replication<br>Complex<br>Component 1      | Protein<br>Coding    | 35 | GC17M009<br>204 | 15.21308 | <a href="https://www.genecards.org/cgi-bin/carddisp.pl?gene=CTC1">https://www.genecards.org/cgi-bin/carddisp.pl?gene=CTC1</a>                 |
| COX6B1           | Cytochrome C<br>Oxidase<br>Subunit 6B1                     | Protein<br>Coding    | 43 | GC19P0403<br>58 | 15.21075 | <a href="https://www.genecards.org/cgi-bin/carddisp.pl?gene=COX6B1">https://www.genecards.org/cgi-bin/carddisp.pl?gene=COX6B1</a>             |
| MIR499A          | MicroRNA 499a                                              | RNA<br>Gene          | 21 | GC20P0349<br>90 | 15.19535 | <a href="https://www.genecards.org/cgi-bin/carddisp.pl?gene=MIR499A">https://www.genecards.org/cgi-bin/carddisp.pl?gene=MIR499A</a>           |
| APTX             | Aprataxin                                                  | Protein<br>Coding    | 45 | GC09M032<br>886 | 15.18989 | <a href="https://www.genecards.org/cgi-bin/carddisp.pl?gene=APTX">https://www.genecards.org/cgi-bin/carddisp.pl?gene=APTX</a>                 |
| GCLC             | Glutamate-<br>Cysteine Ligase<br>Catalytic<br>Subunit      | Protein<br>Coding    | 44 | GC06M053<br>497 | 15.1827  | <a href="https://www.genecards.org/cgi-bin/carddisp.pl?gene=GCLC">https://www.genecards.org/cgi-bin/carddisp.pl?gene=GCLC</a>                 |
| LOC11366<br>4106 | CFTR Intron 2<br>DNase I<br>Hypersensitive<br>Site         | Biological<br>Region | 2  | GC07P1175<br>08 | 15.17766 | <a href="https://www.genecards.org/cgi-bin/carddisp.pl?gene=LOC113664106">https://www.genecards.org/cgi-bin/carddisp.pl?gene=LOC113664106</a> |



|          |                                                      |                |    |             |          |                                                                                                                                       |
|----------|------------------------------------------------------|----------------|----|-------------|----------|---------------------------------------------------------------------------------------------------------------------------------------|
| COL18A1  | Collagen Type XVIII Alpha 1 Chain                    | Protein Coding | 45 | GC21P045405 | 15.17525 | <a href="https://www.genecards.org/cgi-bin/carddisp.pl?gene=COL18A1">https://www.genecards.org/cgi-bin/carddisp.pl?gene=COL18A1</a>   |
| CDKL5    | Cyclin Dependent Kinase Like 5                       | Protein Coding | 44 | GC0XP018425 | 15.17344 | <a href="https://www.genecards.org/cgi-bin/carddisp.pl?gene=CDKL5">https://www.genecards.org/cgi-bin/carddisp.pl?gene=CDKL5</a>       |
| UBE2L3   | Ubiquitin Conjugating Enzyme E2 L3                   | Protein Coding | 46 | GC22P021549 | 15.1722  | <a href="https://www.genecards.org/cgi-bin/carddisp.pl?gene=UBE2L3">https://www.genecards.org/cgi-bin/carddisp.pl?gene=UBE2L3</a>     |
| RB1CC1   | RB1 Inducible Coiled-Coil 1                          | Protein Coding | 43 | GC08M052622 | 15.16649 | <a href="https://www.genecards.org/cgi-bin/carddisp.pl?gene=RB1CC1">https://www.genecards.org/cgi-bin/carddisp.pl?gene=RB1CC1</a>     |
| DHCR7    | 7-Dehydrocholesterol Reductase                       | Protein Coding | 47 | GC11M071428 | 15.15968 | <a href="https://www.genecards.org/cgi-bin/carddisp.pl?gene=DHCR7">https://www.genecards.org/cgi-bin/carddisp.pl?gene=DHCR7</a>       |
| MIR342   | MicroRNA 342                                         | RNA Gene       | 19 | GC14P100109 | 15.14464 | <a href="https://www.genecards.org/cgi-bin/carddisp.pl?gene=MIR342">https://www.genecards.org/cgi-bin/carddisp.pl?gene=MIR342</a>     |
| MEF2A    | Myocyte Enhancer Factor 2A                           | Protein Coding | 48 | GC15P099565 | 15.14463 | <a href="https://www.genecards.org/cgi-bin/carddisp.pl?gene=MEF2A">https://www.genecards.org/cgi-bin/carddisp.pl?gene=MEF2A</a>       |
| MIR185   | MicroRNA 185                                         | RNA Gene       | 21 | GC22P020106 | 15.1385  | <a href="https://www.genecards.org/cgi-bin/carddisp.pl?gene=MIR185">https://www.genecards.org/cgi-bin/carddisp.pl?gene=MIR185</a>     |
| UBD      | Ubiquitin D                                          | Protein Coding | 39 | GC06M046741 | 15.11981 | <a href="https://www.genecards.org/cgi-bin/carddisp.pl?gene=UBD">https://www.genecards.org/cgi-bin/carddisp.pl?gene=UBD</a>           |
| NEAT1    | Nuclear Paraspeckle Assembly Transcript 1            | RNA Gene       | 23 | GC11P066222 | 15.11348 | <a href="https://www.genecards.org/cgi-bin/carddisp.pl?gene=NEAT1">https://www.genecards.org/cgi-bin/carddisp.pl?gene=NEAT1</a>       |
| PGAM2    | Phosphoglycerate Mutase 2                            | Protein Coding | 45 | GC07M044062 | 15.10423 | <a href="https://www.genecards.org/cgi-bin/carddisp.pl?gene=PGAM2">https://www.genecards.org/cgi-bin/carddisp.pl?gene=PGAM2</a>       |
| PTRH2    | Peptidyl-TRNA Hydrolase 2                            | Protein Coding | 45 | GC17M059674 | 15.09198 | <a href="https://www.genecards.org/cgi-bin/carddisp.pl?gene=PTRH2">https://www.genecards.org/cgi-bin/carddisp.pl?gene=PTRH2</a>       |
| TBCE     | Tubulin Folding Cofactor E                           | Protein Coding | 39 | GC01P235357 | 15.0892  | <a href="https://www.genecards.org/cgi-bin/carddisp.pl?gene=TBCE">https://www.genecards.org/cgi-bin/carddisp.pl?gene=TBCE</a>         |
| DAG1     | Dystroglycan 1                                       | Protein Coding | 47 | GC03P049482 | 15.08203 | <a href="https://www.genecards.org/cgi-bin/carddisp.pl?gene=DAG1">https://www.genecards.org/cgi-bin/carddisp.pl?gene=DAG1</a>         |
| MC4R     | Melanocortin 4 Receptor                              | Protein Coding | 47 | GC18M060371 | 15.08177 | <a href="https://www.genecards.org/cgi-bin/carddisp.pl?gene=MC4R">https://www.genecards.org/cgi-bin/carddisp.pl?gene=MC4R</a>         |
| AIPL1    | Aryl Hydrocarbon Receptor Interacting Protein Like 1 | Protein Coding | 43 | GC17M006393 | 15.0814  | <a href="https://www.genecards.org/cgi-bin/carddisp.pl?gene=AIPL1">https://www.genecards.org/cgi-bin/carddisp.pl?gene=AIPL1</a>       |
| COX8A    | Cytochrome C Oxidase Subunit 8A                      | Protein Coding | 41 | GC11P063994 | 15.06893 | <a href="https://www.genecards.org/cgi-bin/carddisp.pl?gene=COX8A">https://www.genecards.org/cgi-bin/carddisp.pl?gene=COX8A</a>       |
| MIR486-1 | MicroRNA 486-1                                       | RNA Gene       | 16 | GC08M041660 | 15.06324 | <a href="https://www.genecards.org/cgi-bin/carddisp.pl?gene=MIR486-1">https://www.genecards.org/cgi-bin/carddisp.pl?gene=MIR486-1</a> |
| WDPCP    | WD Repeat Containing Planar Cell Polarity Effector   | Protein Coding | 37 | GC02M063121 | 15.05699 | <a href="https://www.genecards.org/cgi-bin/carddisp.pl?gene=WDPCP">https://www.genecards.org/cgi-bin/carddisp.pl?gene=WDPCP</a>       |

|         |                                                                         |                   |    |                 |          |                                                                                                                                     |
|---------|-------------------------------------------------------------------------|-------------------|----|-----------------|----------|-------------------------------------------------------------------------------------------------------------------------------------|
| SYNE1   | Spectrin Repeat<br>Containing<br>Nuclear<br>Envelope<br>Protein 1       | Protein<br>Coding | 41 | GC06M152<br>121 | 15.05679 | <a href="https://www.genecards.org/cgi-bin/carddisp.pl?gene=SYNE1">https://www.genecards.org/cgi-bin/carddisp.pl?gene=SYNE1</a>     |
| MIR15B  | MicroRNA 15b                                                            | RNA<br>Gene       | 19 | GC03P1604<br>04 | 15.04995 | <a href="https://www.genecards.org/cgi-bin/carddisp.pl?gene=MIR15B">https://www.genecards.org/cgi-bin/carddisp.pl?gene=MIR15B</a>   |
| STIM1   | Stromal<br>Interaction<br>Molecule 1                                    | Protein<br>Coding | 49 | GC11P0038<br>55 | 15.04688 | <a href="https://www.genecards.org/cgi-bin/carddisp.pl?gene=STIM1">https://www.genecards.org/cgi-bin/carddisp.pl?gene=STIM1</a>     |
| CYP4F2  | Cytochrome<br>P450 Family 4<br>Subfamily F<br>Member 2                  | Protein<br>Coding | 45 | GC19M015<br>878 | 15.04514 | <a href="https://www.genecards.org/cgi-bin/carddisp.pl?gene=CYP4F2">https://www.genecards.org/cgi-bin/carddisp.pl?gene=CYP4F2</a>   |
| UQCRC2  | Ubiquinol-<br>Cytochrome C<br>Reductase Core<br>Protein 2               | Protein<br>Coding | 47 | GC16P0219<br>63 | 15.035   | <a href="https://www.genecards.org/cgi-bin/carddisp.pl?gene=UQCRC2">https://www.genecards.org/cgi-bin/carddisp.pl?gene=UQCRC2</a>   |
| CDC25A  | Cell Division<br>Cycle 25A<br>4-                                        | Protein<br>Coding | 48 | GC03M048<br>173 | 15.0292  | <a href="https://www.genecards.org/cgi-bin/carddisp.pl?gene=CDC25A">https://www.genecards.org/cgi-bin/carddisp.pl?gene=CDC25A</a>   |
| HPD     | Hydroxyphenyl<br>pyruvate<br>Dioxygenase                                | Protein<br>Coding | 46 | GC12M121<br>839 | 15.02463 | <a href="https://www.genecards.org/cgi-bin/carddisp.pl?gene=HPD">https://www.genecards.org/cgi-bin/carddisp.pl?gene=HPD</a>         |
| CD68    | CD68 Molecule                                                           | Protein<br>Coding | 40 | GC17P0075<br>79 | 15.0206  | <a href="https://www.genecards.org/cgi-bin/carddisp.pl?gene=CD68">https://www.genecards.org/cgi-bin/carddisp.pl?gene=CD68</a>       |
| ERCC3   | ERCC Excision<br>Repair 3, TFIIH<br>Core Complex<br>Helicase<br>Subunit | Protein<br>Coding | 48 | GC02M127<br>257 | 15.01849 | <a href="https://www.genecards.org/cgi-bin/carddisp.pl?gene=ERCC3">https://www.genecards.org/cgi-bin/carddisp.pl?gene=ERCC3</a>     |
| TANGO2  | Transport And<br>Golgi<br>Organization 2<br>Homolog                     | Protein<br>Coding | 36 | GC22P0200<br>17 | 15.0146  | <a href="https://www.genecards.org/cgi-bin/carddisp.pl?gene=TANGO2">https://www.genecards.org/cgi-bin/carddisp.pl?gene=TANGO2</a>   |
| MED12   | Mediator<br>Complex<br>Subunit 12                                       | Protein<br>Coding | 45 | GC0XP0711<br>18 | 14.99786 | <a href="https://www.genecards.org/cgi-bin/carddisp.pl?gene=MED12">https://www.genecards.org/cgi-bin/carddisp.pl?gene=MED12</a>     |
| UNC13D  | Unc-13<br>Homolog D<br>Interleukin 1                                    | Protein<br>Coding | 44 | GC17M075<br>827 | 14.99652 | <a href="https://www.genecards.org/cgi-bin/carddisp.pl?gene=UNC13D">https://www.genecards.org/cgi-bin/carddisp.pl?gene=UNC13D</a>   |
| IRAK1   | Receptor<br>Associated<br>Kinase 1                                      | Protein<br>Coding | 50 | GC0XM154<br>010 | 14.98808 | <a href="https://www.genecards.org/cgi-bin/carddisp.pl?gene=IRAK1">https://www.genecards.org/cgi-bin/carddisp.pl?gene=IRAK1</a>     |
| CYP11B2 | Cytochrome<br>P450 Family 11<br>Subfamily B<br>Member 2                 | Protein<br>Coding | 48 | GC08M142<br>910 | 14.97955 | <a href="https://www.genecards.org/cgi-bin/carddisp.pl?gene=CYP11B2">https://www.genecards.org/cgi-bin/carddisp.pl?gene=CYP11B2</a> |
| GRIA2   | Glutamate<br>Ionotropic<br>Receptor<br>AMPA Type<br>Subunit 2           | Protein<br>Coding | 51 | GC04P1572<br>04 | 14.97819 | <a href="https://www.genecards.org/cgi-bin/carddisp.pl?gene=GRIA2">https://www.genecards.org/cgi-bin/carddisp.pl?gene=GRIA2</a>     |
| GSN     | Gelsolin                                                                | Protein<br>Coding | 49 | GC09P1212<br>01 | 14.95962 | <a href="https://www.genecards.org/cgi-bin/carddisp.pl?gene=GSN">https://www.genecards.org/cgi-bin/carddisp.pl?gene=GSN</a>         |
| BBS9    | Bardet-Biedl<br>Syndrome 9                                              | Protein<br>Coding | 39 | GC07P0331<br>12 | 14.95851 | <a href="https://www.genecards.org/cgi-bin/carddisp.pl?gene=BBS9">https://www.genecards.org/cgi-bin/carddisp.pl?gene=BBS9</a>       |

|          |                                                  |                |    |             |          |                                                                                                                                       |
|----------|--------------------------------------------------|----------------|----|-------------|----------|---------------------------------------------------------------------------------------------------------------------------------------|
| GK       | Glycerol Kinase                                  | Protein Coding | 48 | GC0XP030747 | 14.95562 | <a href="https://www.genecards.org/cgi-bin/carddisp.pl?gene=GK">https://www.genecards.org/cgi-bin/carddisp.pl?gene=GK</a>             |
| FARSA    | Phenylalanyl-TRNA Synthetase Subunit Alpha       | Protein Coding | 41 | GC19M012922 | 14.95508 | <a href="https://www.genecards.org/cgi-bin/carddisp.pl?gene=FARSA">https://www.genecards.org/cgi-bin/carddisp.pl?gene=FARSA</a>       |
| CHRM3    | Cholinergic Receptor Muscarinic 3                | Protein Coding | 50 | GC01P239386 | 14.94667 | <a href="https://www.genecards.org/cgi-bin/carddisp.pl?gene=CHRM3">https://www.genecards.org/cgi-bin/carddisp.pl?gene=CHRM3</a>       |
| VEGFC    | Vascular Endothelial Growth Factor C             | Protein Coding | 48 | GC04M176683 | 14.9419  | <a href="https://www.genecards.org/cgi-bin/carddisp.pl?gene=VEGFC">https://www.genecards.org/cgi-bin/carddisp.pl?gene=VEGFC</a>       |
| TGM1     | Transglutaminase 1                               | Protein Coding | 46 | GC14M024249 | 14.93787 | <a href="https://www.genecards.org/cgi-bin/carddisp.pl?gene=TGM1">https://www.genecards.org/cgi-bin/carddisp.pl?gene=TGM1</a>         |
| AURKA    | Aurora Kinase A                                  | Protein Coding | 52 | GC20M056370 | 14.93218 | <a href="https://www.genecards.org/cgi-bin/carddisp.pl?gene=AURKA">https://www.genecards.org/cgi-bin/carddisp.pl?gene=AURKA</a>       |
| MTFMT    | Mitochondrial Methionyl-TRNA Formyltransferase   | Protein Coding | 42 | GC15M065001 | 14.9236  | <a href="https://www.genecards.org/cgi-bin/carddisp.pl?gene=MTFMT">https://www.genecards.org/cgi-bin/carddisp.pl?gene=MTFMT</a>       |
| SERPINA7 | Serpin Family A Member 7                         | Protein Coding | 40 | GC0XM106032 | 14.91298 | <a href="https://www.genecards.org/cgi-bin/carddisp.pl?gene=SERPINA7">https://www.genecards.org/cgi-bin/carddisp.pl?gene=SERPINA7</a> |
| ACSS2    | Acyl-CoA Synthetase Short Chain Family Member 2  | Protein Coding | 44 | GC20P034873 | 14.90542 | <a href="https://www.genecards.org/cgi-bin/carddisp.pl?gene=ACSS2">https://www.genecards.org/cgi-bin/carddisp.pl?gene=ACSS2</a>       |
| IMPG2    | Interphotoreceptor Matrix Proteoglycan 2         | Protein Coding | 38 | GC03M101222 | 14.90423 | <a href="https://www.genecards.org/cgi-bin/carddisp.pl?gene=IMPG2">https://www.genecards.org/cgi-bin/carddisp.pl?gene=IMPG2</a>       |
| ARID1A   | AT-Rich Interaction Domain 1A                    | Protein Coding | 45 | GC01P026693 | 14.89883 | <a href="https://www.genecards.org/cgi-bin/carddisp.pl?gene=ARID1A">https://www.genecards.org/cgi-bin/carddisp.pl?gene=ARID1A</a>     |
| TXN      | Thioredoxin                                      | Protein Coding | 46 | GC09M110243 | 14.89429 | <a href="https://www.genecards.org/cgi-bin/carddisp.pl?gene=TXN">https://www.genecards.org/cgi-bin/carddisp.pl?gene=TXN</a>           |
| MGAM     | Maltase-Glucoamylase                             | Protein Coding | 42 | GC07P145925 | 14.89125 | <a href="https://www.genecards.org/cgi-bin/carddisp.pl?gene=MGAM">https://www.genecards.org/cgi-bin/carddisp.pl?gene=MGAM</a>         |
| CREB3L3  | CAMP Responsive Element Binding Protein 3 Like 3 | Protein Coding | 40 | GC19P004153 | 14.88233 | <a href="https://www.genecards.org/cgi-bin/carddisp.pl?gene=CREB3L3">https://www.genecards.org/cgi-bin/carddisp.pl?gene=CREB3L3</a>   |
| TNFSF12  | TNF Superfamily Member 12                        | Protein Coding | 41 | GC17P009104 | 14.87695 | <a href="https://www.genecards.org/cgi-bin/carddisp.pl?gene=TNFSF12">https://www.genecards.org/cgi-bin/carddisp.pl?gene=TNFSF12</a>   |
| AXIN2    | Axin 2                                           | Protein Coding | 49 | GC17M065528 | 14.87438 | <a href="https://www.genecards.org/cgi-bin/carddisp.pl?gene=AXIN2">https://www.genecards.org/cgi-bin/carddisp.pl?gene=AXIN2</a>       |
| SIGMAR1  | Sigma Non-Opioid Intracellular Receptor 1        | Protein Coding | 48 | GC09M034634 | 14.87434 | <a href="https://www.genecards.org/cgi-bin/carddisp.pl?gene=SIGMAR1">https://www.genecards.org/cgi-bin/carddisp.pl?gene=SIGMAR1</a>   |
| SNAP29   | Synaptosome Associated Protein 29                | Protein Coding | 43 | GC22P020859 | 14.87272 | <a href="https://www.genecards.org/cgi-bin/carddisp.pl?gene=SNAP29">https://www.genecards.org/cgi-bin/carddisp.pl?gene=SNAP29</a>     |

|          |                                                        |                |    |             |          |                                                                                                                                       |
|----------|--------------------------------------------------------|----------------|----|-------------|----------|---------------------------------------------------------------------------------------------------------------------------------------|
| TYROBP   | Transmembrane Immune Signaling Adaptor TYROBP          | Protein Coding | 44 | GC19M035904 | 14.86237 | <a href="https://www.genecards.org/cgi-bin/carddisp.pl?gene=TYROBP">https://www.genecards.org/cgi-bin/carddisp.pl?gene=TYROBP</a>     |
| PDE5A    | Phosphodiesterase 5A                                   | Protein Coding | 45 | GC04M119494 | 14.862   | <a href="https://www.genecards.org/cgi-bin/carddisp.pl?gene=PDE5A">https://www.genecards.org/cgi-bin/carddisp.pl?gene=PDE5A</a>       |
| KCTD17   | Potassium Channel Tetramerization Domain Containing 17 | Protein Coding | 40 | GC22P037051 | 14.85376 | <a href="https://www.genecards.org/cgi-bin/carddisp.pl?gene=KCTD17">https://www.genecards.org/cgi-bin/carddisp.pl?gene=KCTD17</a>     |
| PRDX6    | Peroxiredoxin 6                                        | Protein Coding | 47 | GC01P173477 | 14.83703 | <a href="https://www.genecards.org/cgi-bin/carddisp.pl?gene=PRDX6">https://www.genecards.org/cgi-bin/carddisp.pl?gene=PRDX6</a>       |
| PRSS2    | Serine Protease 2                                      | Protein Coding | 41 | GC07P145798 | 14.82199 | <a href="https://www.genecards.org/cgi-bin/carddisp.pl?gene=PRSS2">https://www.genecards.org/cgi-bin/carddisp.pl?gene=PRSS2</a>       |
| MCL1     | MCL1 Apoptosis Regulator, BCL2 Family Member           | Protein Coding | 48 | GC01M150561 | 14.80123 | <a href="https://www.genecards.org/cgi-bin/carddisp.pl?gene=MCL1">https://www.genecards.org/cgi-bin/carddisp.pl?gene=MCL1</a>         |
| ACSM2B   | Acyl-CoA Synthetase Medium Chain Family Member 2B      | Protein Coding | 36 | GC16M020547 | 14.79    | <a href="https://www.genecards.org/cgi-bin/carddisp.pl?gene=ACSM2B">https://www.genecards.org/cgi-bin/carddisp.pl?gene=ACSM2B</a>     |
| IGHE     | Immunoglobulin Heavy Constant Epsilon                  | Protein Coding | 26 | GC14M110308 | 14.78862 | <a href="https://www.genecards.org/cgi-bin/carddisp.pl?gene=IGHE">https://www.genecards.org/cgi-bin/carddisp.pl?gene=IGHE</a>         |
| HSD17B12 | Hydroxysteroid 17-Beta Dehydrogenase 12                | Protein Coding | 41 | GC11P043660 | 14.78369 | <a href="https://www.genecards.org/cgi-bin/carddisp.pl?gene=HSD17B12">https://www.genecards.org/cgi-bin/carddisp.pl?gene=HSD17B12</a> |
| IFNAR2   | Interferon Alpha And Beta Receptor Subunit 2           | Protein Coding | 49 | GC21P033229 | 14.78071 | <a href="https://www.genecards.org/cgi-bin/carddisp.pl?gene=IFNAR2">https://www.genecards.org/cgi-bin/carddisp.pl?gene=IFNAR2</a>     |
| ANKLE2   | Ankyrin Repeat And LEM Domain Containing 2             | Protein Coding | 39 | GC12M132725 | 14.76638 | <a href="https://www.genecards.org/cgi-bin/carddisp.pl?gene=ANKLE2">https://www.genecards.org/cgi-bin/carddisp.pl?gene=ANKLE2</a>     |
| PML      | PML Nuclear Body Scaffold                              | Protein Coding | 46 | GC15P073994 | 14.76556 | <a href="https://www.genecards.org/cgi-bin/carddisp.pl?gene=PML">https://www.genecards.org/cgi-bin/carddisp.pl?gene=PML</a>           |
| PSMB4    | Proteasome 20S Subunit Beta 4                          | Protein Coding | 46 | GC01P151372 | 14.75507 | <a href="https://www.genecards.org/cgi-bin/carddisp.pl?gene=PSMB4">https://www.genecards.org/cgi-bin/carddisp.pl?gene=PSMB4</a>       |
| NUBPL    | Nucleotide Binding Protein Like                        | Protein Coding | 40 | GC14P031489 | 14.7522  | <a href="https://www.genecards.org/cgi-bin/carddisp.pl?gene=NUBPL">https://www.genecards.org/cgi-bin/carddisp.pl?gene=NUBPL</a>       |
| SLC29A3  | Solute Carrier Family 29 Member 3                      | Protein Coding | 44 | GC10P071320 | 14.75152 | <a href="https://www.genecards.org/cgi-bin/carddisp.pl?gene=SLC29A3">https://www.genecards.org/cgi-bin/carddisp.pl?gene=SLC29A3</a>   |
| NRXN1    | Neurexin 1                                             | Protein Coding | 48 | GC02M049918 | 14.7514  | <a href="https://www.genecards.org/cgi-bin/carddisp.pl?gene=NRXN1">https://www.genecards.org/cgi-bin/carddisp.pl?gene=NRXN1</a>       |
| TMEM199  | Transmembrane Protein 199                              | Protein Coding | 34 | GC17P029324 | 14.74572 | <a href="https://www.genecards.org/cgi-bin/carddisp.pl?gene=TMEM199">https://www.genecards.org/cgi-bin/carddisp.pl?gene=TMEM199</a>   |

|          |                                                                        |                |    |             |          |                                                                                                                                       |
|----------|------------------------------------------------------------------------|----------------|----|-------------|----------|---------------------------------------------------------------------------------------------------------------------------------------|
| HTR1B    | 5-Hydroxytryptamine Receptor 1B                                        | Protein Coding | 45 | GC06M077478 | 14.74036 | <a href="https://www.genecards.org/cgi-bin/carddisp.pl?gene=HTR1B">https://www.genecards.org/cgi-bin/carddisp.pl?gene=HTR1B</a>       |
| SC5D     | Sterol-C5-Desaturase Gamma-Aminobutyric Acid Type B Receptor Subunit 1 | Protein Coding | 40 | GC11P121292 | 14.73855 | <a href="https://www.genecards.org/cgi-bin/carddisp.pl?gene=SC5D">https://www.genecards.org/cgi-bin/carddisp.pl?gene=SC5D</a>         |
| GABBR1   | Protein Kinase D1                                                      | Protein Coding | 48 | GC06M029555 | 14.73711 | <a href="https://www.genecards.org/cgi-bin/carddisp.pl?gene=GABBR1">https://www.genecards.org/cgi-bin/carddisp.pl?gene=GABBR1</a>     |
| PRKD1    | RAB3 GTPase Activating Protein Catalytic Subunit 1                     | Protein Coding | 51 | GC14M029576 | 14.73232 | <a href="https://www.genecards.org/cgi-bin/carddisp.pl?gene=PRKD1">https://www.genecards.org/cgi-bin/carddisp.pl?gene=PRKD1</a>       |
| RAB3GAP1 | C-Type Lectin Domain Containing 7A                                     | Protein Coding | 41 | GC02P135052 | 14.72537 | <a href="https://www.genecards.org/cgi-bin/carddisp.pl?gene=RAB3GAP1">https://www.genecards.org/cgi-bin/carddisp.pl?gene=RAB3GAP1</a> |
| CLEC7A   | Kruppel Like Factor 6                                                  | Protein Coding | 45 | GC12M015684 | 14.7238  | <a href="https://www.genecards.org/cgi-bin/carddisp.pl?gene=CLEC7A">https://www.genecards.org/cgi-bin/carddisp.pl?gene=CLEC7A</a>     |
| KLF6     | Lysine Methyltransferase 2B                                            | Protein Coding | 44 | GC10M003779 | 14.71518 | <a href="https://www.genecards.org/cgi-bin/carddisp.pl?gene=KLF6">https://www.genecards.org/cgi-bin/carddisp.pl?gene=KLF6</a>         |
| KMT2B    | Integrin Subunit Alpha 2                                               | Protein Coding | 39 | GC19P040361 | 14.69971 | <a href="https://www.genecards.org/cgi-bin/carddisp.pl?gene=KMT2B">https://www.genecards.org/cgi-bin/carddisp.pl?gene=KMT2B</a>       |
| ITGA2    | Retinol Dehydrogenase 5                                                | Protein Coding | 47 | GC05P052989 | 14.69604 | <a href="https://www.genecards.org/cgi-bin/carddisp.pl?gene=ITGA2">https://www.genecards.org/cgi-bin/carddisp.pl?gene=ITGA2</a>       |
| RDH5     | Profilin 1                                                             | Protein Coding | 47 | GC12P055720 | 14.67124 | <a href="https://www.genecards.org/cgi-bin/carddisp.pl?gene=RDH5">https://www.genecards.org/cgi-bin/carddisp.pl?gene=RDH5</a>         |
| PFN1     | Activator Of Transcription And Developmental Regulator AUTS2           | Protein Coding | 48 | GC17M004945 | 14.66519 | <a href="https://www.genecards.org/cgi-bin/carddisp.pl?gene=PFN1">https://www.genecards.org/cgi-bin/carddisp.pl?gene=PFN1</a>         |
| AUTS2    | Dynein Axonemal Heavy Chain 11                                         | Protein Coding | 40 | GC07P069598 | 14.66234 | <a href="https://www.genecards.org/cgi-bin/carddisp.pl?gene=AUTS2">https://www.genecards.org/cgi-bin/carddisp.pl?gene=AUTS2</a>       |
| DNAH11   | Mitochondrially Encoded NADH:Ubiquinone Oxidoreductase Core Subunit 4L | Protein Coding | 42 | GC07P021543 | 14.65823 | <a href="https://www.genecards.org/cgi-bin/carddisp.pl?gene=DNAH11">https://www.genecards.org/cgi-bin/carddisp.pl?gene=DNAH11</a>     |
| MT-ND4L  | Retinol Binding Protein 3                                              | Protein Coding | 29 | GC07P021543 | 14.65598 | <a href="https://www.genecards.org/cgi-bin/carddisp.pl?gene=MT-ND4L">https://www.genecards.org/cgi-bin/carddisp.pl?gene=MT-ND4L</a>   |
| RBP3     | Ubiquilin 2                                                            | Protein Coding | 41 | GC10P047348 | 14.65096 | <a href="https://www.genecards.org/cgi-bin/carddisp.pl?gene=RBP3">https://www.genecards.org/cgi-bin/carddisp.pl?gene=RBP3</a>         |
| UBQLN2   | MicroRNA 196a-1                                                        | Protein Coding | 44 | GC0XP056563 | 14.63818 | <a href="https://www.genecards.org/cgi-bin/carddisp.pl?gene=UBQLN2">https://www.genecards.org/cgi-bin/carddisp.pl?gene=UBQLN2</a>     |
| MIR196A1 |                                                                        | RNA Gene       | 20 | GC17M048632 | 14.63727 | <a href="https://www.genecards.org/cgi-bin/carddisp.pl?gene=MIR196A1">https://www.genecards.org/cgi-bin/carddisp.pl?gene=MIR196A1</a> |

|              |                                                   |                   |    |             |          |                                                                                                                                               |
|--------------|---------------------------------------------------|-------------------|----|-------------|----------|-----------------------------------------------------------------------------------------------------------------------------------------------|
| LOC113633877 | CFTR Intron 19<br>DNase I Hypersensitive Site     | Biological Region | 2  | GC07P117639 | 14.63089 | <a href="https://www.genecards.org/cgi-bin/carddisp.pl?gene=LOC113633877">https://www.genecards.org/cgi-bin/carddisp.pl?gene=LOC113633877</a> |
| IL6ST        | Interleukin 6 Cytokine Family Signal Transducer   | Protein Coding    | 47 | GC05M055935 | 14.59988 | <a href="https://www.genecards.org/cgi-bin/carddisp.pl?gene=IL6ST">https://www.genecards.org/cgi-bin/carddisp.pl?gene=IL6ST</a>               |
| TMEM237      | Transmembrane Protein 237                         | Protein Coding    | 37 | GC02M201620 | 14.59057 | <a href="https://www.genecards.org/cgi-bin/carddisp.pl?gene=TMEM237">https://www.genecards.org/cgi-bin/carddisp.pl?gene=TMEM237</a>           |
| MECOM        | MDS1 And EVI1 Complex Locus                       | Protein Coding    | 48 | GC03M169083 | 14.58373 | <a href="https://www.genecards.org/cgi-bin/carddisp.pl?gene=MECOM">https://www.genecards.org/cgi-bin/carddisp.pl?gene=MECOM</a>               |
| BSG          | Basigin (Ok Blood Group)                          | Protein Coding    | 44 | GC19P000571 | 14.58112 | <a href="https://www.genecards.org/cgi-bin/carddisp.pl?gene=BSG">https://www.genecards.org/cgi-bin/carddisp.pl?gene=BSG</a>                   |
| GNPAT        | Glyceronephosphate O-Acyltransferase              | Protein Coding    | 46 | GC01P231241 | 14.57617 | <a href="https://www.genecards.org/cgi-bin/carddisp.pl?gene=GNPAT">https://www.genecards.org/cgi-bin/carddisp.pl?gene=GNPAT</a>               |
| MIR146B      | MicroRNA 146b                                     | RNA Gene          | 19 | GC10P102436 | 14.57183 | <a href="https://www.genecards.org/cgi-bin/carddisp.pl?gene=MIR146B">https://www.genecards.org/cgi-bin/carddisp.pl?gene=MIR146B</a>           |
| ALS2         | Alsin Rho Guanine Nucleotide Exchange Factor ALS2 | Protein Coding    | 45 | GC02M201701 | 14.57145 | <a href="https://www.genecards.org/cgi-bin/carddisp.pl?gene=ALS2">https://www.genecards.org/cgi-bin/carddisp.pl?gene=ALS2</a>                 |
| LRP2         | LDL Receptor Related Protein 2                    | Protein Coding    | 47 | GC02M169127 | 14.5696  | <a href="https://www.genecards.org/cgi-bin/carddisp.pl?gene=LRP2">https://www.genecards.org/cgi-bin/carddisp.pl?gene=LRP2</a>                 |
| HCFC1        | Host Cell Factor C1                               | Protein Coding    | 47 | GC0XM153947 | 14.56435 | <a href="https://www.genecards.org/cgi-bin/carddisp.pl?gene=HCFC1">https://www.genecards.org/cgi-bin/carddisp.pl?gene=HCFC1</a>               |
| PYY          | Peptide YY                                        | Protein Coding    | 43 | GC17M043952 | 14.56344 | <a href="https://www.genecards.org/cgi-bin/carddisp.pl?gene=PYY">https://www.genecards.org/cgi-bin/carddisp.pl?gene=PYY</a>                   |
| TCTN1        | Tectonic Family Member 1                          | Protein Coding    | 37 | GC12P110614 | 14.55394 | <a href="https://www.genecards.org/cgi-bin/carddisp.pl?gene=TCTN1">https://www.genecards.org/cgi-bin/carddisp.pl?gene=TCTN1</a>               |
| TRB          | T Cell Receptor Beta Locus                        | Protein Coding    | 17 | GC07P146007 | 14.55346 | <a href="https://www.genecards.org/cgi-bin/carddisp.pl?gene=TRB">https://www.genecards.org/cgi-bin/carddisp.pl?gene=TRB</a>                   |
| TMEM106B     | Transmembrane Protein 106B                        | Protein Coding    | 39 | GC07P012218 | 14.54716 | <a href="https://www.genecards.org/cgi-bin/carddisp.pl?gene=TMEM106B">https://www.genecards.org/cgi-bin/carddisp.pl?gene=TMEM106B</a>         |
| GPC1         | Glypican 1                                        | Protein Coding    | 44 | GC02P240435 | 14.53975 | <a href="https://www.genecards.org/cgi-bin/carddisp.pl?gene=GPC1">https://www.genecards.org/cgi-bin/carddisp.pl?gene=GPC1</a>                 |
| GSTA1        | Glutathione S-Transferase Alpha 1                 | Protein Coding    | 43 | GC06M052791 | 14.53854 | <a href="https://www.genecards.org/cgi-bin/carddisp.pl?gene=GSTA1">https://www.genecards.org/cgi-bin/carddisp.pl?gene=GSTA1</a>               |
| SOAT2        | Sterol O-Acyltransferase 2                        | Protein Coding    | 44 | GC12P053103 | 14.53415 | <a href="https://www.genecards.org/cgi-bin/carddisp.pl?gene=SOAT2">https://www.genecards.org/cgi-bin/carddisp.pl?gene=SOAT2</a>               |
| APOD         | Apolipoprotein D                                  | Protein Coding    | 43 | GC03M195568 | 14.5337  | <a href="https://www.genecards.org/cgi-bin/carddisp.pl?gene=APOD">https://www.genecards.org/cgi-bin/carddisp.pl?gene=APOD</a>                 |
| SDC1         | Syndecan 1                                        | Protein Coding    | 44 | GC02M020200 | 14.53241 | <a href="https://www.genecards.org/cgi-bin/carddisp.pl?gene=SDC1">https://www.genecards.org/cgi-bin/carddisp.pl?gene=SDC1</a>                 |
| LAMP1        | Lysosomal Associated Membrane Protein 1           | Protein Coding    | 43 | GC13P113297 | 14.52898 | <a href="https://www.genecards.org/cgi-bin/carddisp.pl?gene=LAMP1">https://www.genecards.org/cgi-bin/carddisp.pl?gene=LAMP1</a>               |

|          |                                                                                                                               |                   |    |                  |          |                                                                                                                                       |
|----------|-------------------------------------------------------------------------------------------------------------------------------|-------------------|----|------------------|----------|---------------------------------------------------------------------------------------------------------------------------------------|
| ACAT1    | Acetyl-CoA<br>Acetyltransferase 1                                                                                             | Protein<br>Coding | 50 | GC11P1081<br>21  | 14.51504 | <a href="https://www.genecards.org/cgi-bin/carddisp.pl?gene=ACAT1">https://www.genecards.org/cgi-bin/carddisp.pl?gene=ACAT1</a>       |
| MAP2     | Microtubule<br>Associated<br>Protein 2                                                                                        | Protein<br>Coding | 43 | GC02P2094<br>24  | 14.49306 | <a href="https://www.genecards.org/cgi-bin/carddisp.pl?gene=MAP2">https://www.genecards.org/cgi-bin/carddisp.pl?gene=MAP2</a>         |
| SNAI1    | Snail Family<br>Transcriptional<br>Repressor 1                                                                                | Protein<br>Coding | 45 | GC20P0499<br>82  | 14.49049 | <a href="https://www.genecards.org/cgi-bin/carddisp.pl?gene=SNAI1">https://www.genecards.org/cgi-bin/carddisp.pl?gene=SNAI1</a>       |
| MIR24-1  | MicroRNA 24-1                                                                                                                 | RNA<br>Gene       | 19 | GC09P0950<br>86  | 14.48898 | <a href="https://www.genecards.org/cgi-bin/carddisp.pl?gene=MIR24-1">https://www.genecards.org/cgi-bin/carddisp.pl?gene=MIR24-1</a>   |
| CDK6     | Cyclin<br>Dependent<br>Kinase 6                                                                                               | Protein<br>Coding | 54 | GC07M092<br>604  | 14.48369 | <a href="https://www.genecards.org/cgi-bin/carddisp.pl?gene=CDK6">https://www.genecards.org/cgi-bin/carddisp.pl?gene=CDK6</a>         |
| GCGR     | Glucagon<br>Receptor                                                                                                          | Protein<br>Coding | 48 | GC17P0818<br>04  | 14.47223 | <a href="https://www.genecards.org/cgi-bin/carddisp.pl?gene=GCGR">https://www.genecards.org/cgi-bin/carddisp.pl?gene=GCGR</a>         |
| MIR106A  | MicroRNA 106a                                                                                                                 | RNA<br>Gene       | 18 | GC0XM134<br>219  | 14.46877 | <a href="https://www.genecards.org/cgi-bin/carddisp.pl?gene=MIR106A">https://www.genecards.org/cgi-bin/carddisp.pl?gene=MIR106A</a>   |
| KIF7     | Kinesin Family<br>Member 7<br>Mitochondrially<br>Encoded                                                                      | Protein<br>Coding | 40 | GC15M089<br>608  | 14.4617  | <a href="https://www.genecards.org/cgi-bin/carddisp.pl?gene=KIF7">https://www.genecards.org/cgi-bin/carddisp.pl?gene=KIF7</a>         |
| MT-TT    | TRNA-Thr<br>(ACN)                                                                                                             | RNA<br>Gene       | 15 | GCMTTP015<br>890 | 14.45234 | <a href="https://www.genecards.org/cgi-bin/carddisp.pl?gene=MT-TT">https://www.genecards.org/cgi-bin/carddisp.pl?gene=MT-TT</a>       |
| TOMM40   | Translocase Of<br>Outer<br>Mitochondrial<br>Membrane 40<br>Vitamin K<br>Epoxide<br>Reductase<br>Complex<br>Subunit 1<br>Major | Protein<br>Coding | 41 | GC19P0448<br>90  | 14.43404 | <a href="https://www.genecards.org/cgi-bin/carddisp.pl?gene=TOMM40">https://www.genecards.org/cgi-bin/carddisp.pl?gene=TOMM40</a>     |
| VKORC1   | Histocompatibil<br>ity Complex,<br>Class II, DP<br>Alpha 1                                                                    | Protein<br>Coding | 47 | GC16M031<br>116  | 14.41591 | <a href="https://www.genecards.org/cgi-bin/carddisp.pl?gene=VKORC1">https://www.genecards.org/cgi-bin/carddisp.pl?gene=VKORC1</a>     |
| HLA-DPA1 | Mannosyl-<br>Oligosaccharid<br>e Glucosidase                                                                                  | Protein<br>Coding | 41 | GC06M033<br>064  | 14.41436 | <a href="https://www.genecards.org/cgi-bin/carddisp.pl?gene=HLA-DPA1">https://www.genecards.org/cgi-bin/carddisp.pl?gene=HLA-DPA1</a> |
| MOGS     | TBL1X<br>Receptor 1                                                                                                           | Protein<br>Coding | 43 | GC02M074<br>461  | 14.40893 | <a href="https://www.genecards.org/cgi-bin/carddisp.pl?gene=MOGS">https://www.genecards.org/cgi-bin/carddisp.pl?gene=MOGS</a>         |
| TBL1XR1  | Sulfotransferas<br>e Family 2B<br>Member 1                                                                                    | Protein<br>Coding | 45 | GC03M177<br>019  | 14.40362 | <a href="https://www.genecards.org/cgi-bin/carddisp.pl?gene=TBL1XR1">https://www.genecards.org/cgi-bin/carddisp.pl?gene=TBL1XR1</a>   |
| SULT2B1  | Vinculin                                                                                                                      | Protein<br>Coding | 46 | GC19P0485<br>52  | 14.40354 | <a href="https://www.genecards.org/cgi-bin/carddisp.pl?gene=SULT2B1">https://www.genecards.org/cgi-bin/carddisp.pl?gene=SULT2B1</a>   |
| VCL      | STEAP3<br>Metalloreducta<br>se                                                                                                | Protein<br>Coding | 48 | GC10P0739<br>95  | 14.40218 | <a href="https://www.genecards.org/cgi-bin/carddisp.pl?gene=VCL">https://www.genecards.org/cgi-bin/carddisp.pl?gene=VCL</a>           |
| STEAP3   | Diacylglycerol<br>Kinase Epsilon                                                                                              | Protein<br>Coding | 45 | GC02P1192<br>22  | 14.40119 | <a href="https://www.genecards.org/cgi-bin/carddisp.pl?gene=STEAP3">https://www.genecards.org/cgi-bin/carddisp.pl?gene=STEAP3</a>     |
| DGKE     |                                                                                                                               | Protein<br>Coding | 49 | GC17P0568<br>34  | 14.39715 | <a href="https://www.genecards.org/cgi-bin/carddisp.pl?gene=DGKE">https://www.genecards.org/cgi-bin/carddisp.pl?gene=DGKE</a>         |

|           |                                                                       |                |    |             |          |                                                                                                                                         |
|-----------|-----------------------------------------------------------------------|----------------|----|-------------|----------|-----------------------------------------------------------------------------------------------------------------------------------------|
| PAFAH1B1  | Platelet Activating Factor Acetylhydrolase 1b                         | Protein Coding | 45 | GC17P002593 | 14.39711 | <a href="https://www.genecards.org/cgi-bin/carddisp.pl?gene=PAFAH1B1">https://www.genecards.org/cgi-bin/carddisp.pl?gene=PAFAH1B1</a>   |
| BCL10     | Regulatory Subunit 1 BCL10 Immune Signaling Adaptor                   | Protein Coding | 45 | GC01M085265 | 14.39367 | <a href="https://www.genecards.org/cgi-bin/carddisp.pl?gene=BCL10">https://www.genecards.org/cgi-bin/carddisp.pl?gene=BCL10</a>         |
| TUBB4A    | Tubulin Beta 4A Class IVa Hepatic And                                 | Protein Coding | 45 | GC19M006496 | 14.39009 | <a href="https://www.genecards.org/cgi-bin/carddisp.pl?gene=TUBB4A">https://www.genecards.org/cgi-bin/carddisp.pl?gene=TUBB4A</a>       |
| HEPACAM   | Glial Cell Adhesion Molecule                                          | Protein Coding | 40 | GC11M124919 | 14.38429 | <a href="https://www.genecards.org/cgi-bin/carddisp.pl?gene=HEPACAM">https://www.genecards.org/cgi-bin/carddisp.pl?gene=HEPACAM</a>     |
| CXCL2     | C-X-C Motif Chemokine Ligand 2                                        | Protein Coding | 41 | GC04M074097 | 14.37961 | <a href="https://www.genecards.org/cgi-bin/carddisp.pl?gene=CXCL2">https://www.genecards.org/cgi-bin/carddisp.pl?gene=CXCL2</a>         |
| NME1      | NME/NM23 Nucleoside Diphosphate Kinase 1                              | Protein Coding | 47 | GC17P051154 | 14.37709 | <a href="https://www.genecards.org/cgi-bin/carddisp.pl?gene=NME1">https://www.genecards.org/cgi-bin/carddisp.pl?gene=NME1</a>           |
| TACR1     | Tachykinin Receptor 1                                                 | Protein Coding | 47 | GC02M075010 | 14.37669 | <a href="https://www.genecards.org/cgi-bin/carddisp.pl?gene=TACR1">https://www.genecards.org/cgi-bin/carddisp.pl?gene=TACR1</a>         |
| MIR199B   | MicroRNA 199b                                                         | RNA Gene       | 19 | GC09M128244 | 14.37488 | <a href="https://www.genecards.org/cgi-bin/carddisp.pl?gene=MIR199B">https://www.genecards.org/cgi-bin/carddisp.pl?gene=MIR199B</a>     |
| PIK3CB    | Phosphatidylinositol-4,5-Bisphosphate 3-Kinase Catalytic Subunit Beta | Protein Coding | 50 | GC03M138652 | 14.36272 | <a href="https://www.genecards.org/cgi-bin/carddisp.pl?gene=PIK3CB">https://www.genecards.org/cgi-bin/carddisp.pl?gene=PIK3CB</a>       |
| ALOX15    | Arachidonate 15-Lipoxygenase                                          | Protein Coding | 45 | GC17M004630 | 14.33671 | <a href="https://www.genecards.org/cgi-bin/carddisp.pl?gene=ALOX15">https://www.genecards.org/cgi-bin/carddisp.pl?gene=ALOX15</a>       |
| HRH2      | Histamine Receptor H2                                                 | Protein Coding | 45 | GC05P175659 | 14.32616 | <a href="https://www.genecards.org/cgi-bin/carddisp.pl?gene=HRH2">https://www.genecards.org/cgi-bin/carddisp.pl?gene=HRH2</a>           |
| TNFRSF13B | TNF Receptor Superfamily Member 13B                                   | Protein Coding | 47 | GC17M016929 | 14.3109  | <a href="https://www.genecards.org/cgi-bin/carddisp.pl?gene=TNFRSF13B">https://www.genecards.org/cgi-bin/carddisp.pl?gene=TNFRSF13B</a> |
| FOXO3     | Forkhead Box O3                                                       | Protein Coding | 44 | GC06P108559 | 14.30285 | <a href="https://www.genecards.org/cgi-bin/carddisp.pl?gene=FOXO3">https://www.genecards.org/cgi-bin/carddisp.pl?gene=FOXO3</a>         |
| HACL1     | 2-Hydroxyacyl-CoA Lyase 1                                             | Protein Coding | 40 | GC03M016952 | 14.30033 | <a href="https://www.genecards.org/cgi-bin/carddisp.pl?gene=HACL1">https://www.genecards.org/cgi-bin/carddisp.pl?gene=HACL1</a>         |
| TAC1      | Tachykinin Precursor 1                                                | Protein Coding | 44 | GC07P097731 | 14.29236 | <a href="https://www.genecards.org/cgi-bin/carddisp.pl?gene=TAC1">https://www.genecards.org/cgi-bin/carddisp.pl?gene=TAC1</a>           |
| EWSR1     | EWS RNA Binding Protein 1                                             | Protein Coding | 44 | GC22P029269 | 14.28753 | <a href="https://www.genecards.org/cgi-bin/carddisp.pl?gene=EWSR1">https://www.genecards.org/cgi-bin/carddisp.pl?gene=EWSR1</a>         |
| MYH14     | Myosin Heavy Chain 14                                                 | Protein Coding | 46 | GC19P050192 | 14.2849  | <a href="https://www.genecards.org/cgi-bin/carddisp.pl?gene=MYH14">https://www.genecards.org/cgi-bin/carddisp.pl?gene=MYH14</a>         |
| LMNB2     | Lamin B2                                                              | Protein Coding | 44 | GC19M002470 | 14.27617 | <a href="https://www.genecards.org/cgi-bin/carddisp.pl?gene=LMNB2">https://www.genecards.org/cgi-bin/carddisp.pl?gene=LMNB2</a>         |



|          |                                                                  |                |    |             |          |                                                                                                                                       |
|----------|------------------------------------------------------------------|----------------|----|-------------|----------|---------------------------------------------------------------------------------------------------------------------------------------|
| CYP21A2  | Cytochrome P450 Family 21 Subfamily A Member 2                   | Protein Coding | 45 | GC06P055225 | 14.27437 | <a href="https://www.genecards.org/cgi-bin/carddisp.pl?gene=CYP21A2">https://www.genecards.org/cgi-bin/carddisp.pl?gene=CYP21A2</a>   |
| IL17F    | Interleukin 17F                                                  | Protein Coding | 42 | GC06M052209 | 14.27191 | <a href="https://www.genecards.org/cgi-bin/carddisp.pl?gene=IL17F">https://www.genecards.org/cgi-bin/carddisp.pl?gene=IL17F</a>       |
| CPA1     | Carboxypeptidase A1                                              | Protein Coding | 45 | GC07P130380 | 14.26514 | <a href="https://www.genecards.org/cgi-bin/carddisp.pl?gene=CPA1">https://www.genecards.org/cgi-bin/carddisp.pl?gene=CPA1</a>         |
| IL1RAPL2 | Interleukin 1 Receptor Accessory Protein Like 2                  | Protein Coding | 38 | GC0XP104566 | 14.26404 | <a href="https://www.genecards.org/cgi-bin/carddisp.pl?gene=IL1RAPL2">https://www.genecards.org/cgi-bin/carddisp.pl?gene=IL1RAPL2</a> |
| KLK3     | Kallikrein Related Peptidase 3                                   | Protein Coding | 47 | GC19P050854 | 14.25673 | <a href="https://www.genecards.org/cgi-bin/carddisp.pl?gene=KLK3">https://www.genecards.org/cgi-bin/carddisp.pl?gene=KLK3</a>         |
| FOXG1    | Forkhead Box G1                                                  | Protein Coding | 44 | GC14P028766 | 14.25183 | <a href="https://www.genecards.org/cgi-bin/carddisp.pl?gene=FOXG1">https://www.genecards.org/cgi-bin/carddisp.pl?gene=FOXG1</a>       |
| KCNMA1   | Potassium Calcium-Activated Channel Subfamily M Alpha 1          | Protein Coding | 50 | GC10M076869 | 14.24044 | <a href="https://www.genecards.org/cgi-bin/carddisp.pl?gene=KCNMA1">https://www.genecards.org/cgi-bin/carddisp.pl?gene=KCNMA1</a>     |
| IDO1     | Indoleamine 2,3-Dioxygenase 1                                    | Protein Coding | 45 | GC08P039891 | 14.23615 | <a href="https://www.genecards.org/cgi-bin/carddisp.pl?gene=IDO1">https://www.genecards.org/cgi-bin/carddisp.pl?gene=IDO1</a>         |
| WNT5A    | Wnt Family Member 5A                                             | Protein Coding | 50 | GC03M055465 | 14.23408 | <a href="https://www.genecards.org/cgi-bin/carddisp.pl?gene=WNT5A">https://www.genecards.org/cgi-bin/carddisp.pl?gene=WNT5A</a>       |
| CCL4     | C-C Motif Chemokine Ligand 4                                     | Protein Coding | 41 | GC17P036103 | 14.23141 | <a href="https://www.genecards.org/cgi-bin/carddisp.pl?gene=CCL4">https://www.genecards.org/cgi-bin/carddisp.pl?gene=CCL4</a>         |
| DPAGT1   | Dolichyl-Phosphate N-Acetylglucosaminophosphotransferase 1 SEC23 | Protein Coding | 45 | GC11M119096 | 14.20544 | <a href="https://www.genecards.org/cgi-bin/carddisp.pl?gene=DPAGT1">https://www.genecards.org/cgi-bin/carddisp.pl?gene=DPAGT1</a>     |
| SEC23B   | Homolog B, COPII Coat Complex Component                          | Protein Coding | 44 | GC20P018507 | 14.20014 | <a href="https://www.genecards.org/cgi-bin/carddisp.pl?gene=SEC23B">https://www.genecards.org/cgi-bin/carddisp.pl?gene=SEC23B</a>     |
| ALPI     | Alkaline Phosphatase, Intestinal                                 | Protein Coding | 44 | GC02P232456 | 14.19633 | <a href="https://www.genecards.org/cgi-bin/carddisp.pl?gene=ALPI">https://www.genecards.org/cgi-bin/carddisp.pl?gene=ALPI</a>         |
| BBS5     | Bardet-Biedl Syndrome 5                                          | Protein Coding | 39 | GC02P169480 | 14.18223 | <a href="https://www.genecards.org/cgi-bin/carddisp.pl?gene=BBS5">https://www.genecards.org/cgi-bin/carddisp.pl?gene=BBS5</a>         |
| MIR335   | MicroRNA 335                                                     | RNA Gene       | 18 | GC07P130496 | 14.1812  | <a href="https://www.genecards.org/cgi-bin/carddisp.pl?gene=MIR335">https://www.genecards.org/cgi-bin/carddisp.pl?gene=MIR335</a>     |
| MIR125B1 | MicroRNA 125b-1                                                  | RNA Gene       | 21 | GC11M122100 | 14.17307 | <a href="https://www.genecards.org/cgi-bin/carddisp.pl?gene=MIR125B1">https://www.genecards.org/cgi-bin/carddisp.pl?gene=MIR125B1</a> |
| TK2      | Thymidine Kinase 2                                               | Protein Coding | 42 | GC16M066508 | 14.16266 | <a href="https://www.genecards.org/cgi-bin/carddisp.pl?gene=TK2">https://www.genecards.org/cgi-bin/carddisp.pl?gene=TK2</a>           |
| SLC22A18 | Solute Carrier Family 22 Member 18                               | Protein Coding | 43 | GC11P002899 | 14.15041 | <a href="https://www.genecards.org/cgi-bin/carddisp.pl?gene=SLC22A18">https://www.genecards.org/cgi-bin/carddisp.pl?gene=SLC22A18</a> |
| HMGA1    | High Mobility Group AT-Hook 1                                    | Protein Coding | 47 | GC06P055309 | 14.14295 | <a href="https://www.genecards.org/cgi-bin/carddisp.pl?gene=HMGA1">https://www.genecards.org/cgi-bin/carddisp.pl?gene=HMGA1</a>       |

|         |                                                                 |                |    |              |          |                                                                                                                                     |
|---------|-----------------------------------------------------------------|----------------|----|--------------|----------|-------------------------------------------------------------------------------------------------------------------------------------|
| SULT1A1 | Sulfotransferase Family 1A Member 1                             | Protein Coding | 43 | GC16M028606  | 14.13631 | <a href="https://www.genecards.org/cgi-bin/carddisp.pl?gene=SULT1A1">https://www.genecards.org/cgi-bin/carddisp.pl?gene=SULT1A1</a> |
| CYP11A1 | Cytochrome P450 Family 11 Subfamily A Member 1                  | Protein Coding | 50 | GC15M074337  | 14.13366 | <a href="https://www.genecards.org/cgi-bin/carddisp.pl?gene=CYP11A1">https://www.genecards.org/cgi-bin/carddisp.pl?gene=CYP11A1</a> |
| CACNA1D | Calcium Voltage-Gated Channel Subunit Alpha1D                   | Protein Coding | 48 | GC03P053328  | 14.1296  | <a href="https://www.genecards.org/cgi-bin/carddisp.pl?gene=CACNA1D">https://www.genecards.org/cgi-bin/carddisp.pl?gene=CACNA1D</a> |
| NEUROD1 | Neuronal Differentiation 1                                      | Protein Coding | 44 | GC02M181673  | 14.12438 | <a href="https://www.genecards.org/cgi-bin/carddisp.pl?gene=NEUROD1">https://www.genecards.org/cgi-bin/carddisp.pl?gene=NEUROD1</a> |
| TPM2    | Tropomyosin 2                                                   | Protein Coding | 46 | GC09M035672  | 14.12218 | <a href="https://www.genecards.org/cgi-bin/carddisp.pl?gene=TPM2">https://www.genecards.org/cgi-bin/carddisp.pl?gene=TPM2</a>       |
| CLOCK   | Clock Circadian Regulator                                       | Protein Coding | 44 | GC04M055427  | 14.12197 | <a href="https://www.genecards.org/cgi-bin/carddisp.pl?gene=CLOCK">https://www.genecards.org/cgi-bin/carddisp.pl?gene=CLOCK</a>     |
| FGF8    | Fibroblast Growth Factor 8                                      | Protein Coding | 48 | GC10M101770  | 14.12045 | <a href="https://www.genecards.org/cgi-bin/carddisp.pl?gene=FGF8">https://www.genecards.org/cgi-bin/carddisp.pl?gene=FGF8</a>       |
| PPP3CA  | Protein Phosphatase 3 Catalytic Subunit Alpha                   | Protein Coding | 54 | GC04M101024  | 14.11228 | <a href="https://www.genecards.org/cgi-bin/carddisp.pl?gene=PPP3CA">https://www.genecards.org/cgi-bin/carddisp.pl?gene=PPP3CA</a>   |
| BRF1    | BRF1 RNA Polymerase III Transcription Initiation Factor Subunit | Protein Coding | 41 | GC14M105345  | 14.10909 | <a href="https://www.genecards.org/cgi-bin/carddisp.pl?gene=BRF1">https://www.genecards.org/cgi-bin/carddisp.pl?gene=BRF1</a>       |
| MMAB    | Metabolism Of Cobalamin Associated B Phosphate                  | Protein Coding | 46 | GC12M109553  | 14.10659 | <a href="https://www.genecards.org/cgi-bin/carddisp.pl?gene=MMAB">https://www.genecards.org/cgi-bin/carddisp.pl?gene=MMAB</a>       |
| PHEX    | Regulating Endopeptidase Homolog X-Linked                       | Protein Coding | 41 | GC0XP022032  | 14.10429 | <a href="https://www.genecards.org/cgi-bin/carddisp.pl?gene=PHEX">https://www.genecards.org/cgi-bin/carddisp.pl?gene=PHEX</a>       |
| MT-TV   | Mitochondrially Encoded TRNA-Val (GUN)                          | RNA Gene       | 14 | GCMTTP001605 | 14.09835 | <a href="https://www.genecards.org/cgi-bin/carddisp.pl?gene=MT-TV">https://www.genecards.org/cgi-bin/carddisp.pl?gene=MT-TV</a>     |
| CD59    | CD59 Molecule (CD59 Blood Group)                                | Protein Coding | 47 | GC11M033704  | 14.09563 | <a href="https://www.genecards.org/cgi-bin/carddisp.pl?gene=CD59">https://www.genecards.org/cgi-bin/carddisp.pl?gene=CD59</a>       |
| HERC2   | HECT And RLD Domain Containing E3 Ubiquitin Protein Ligase 2    | Protein Coding | 45 | GC15M028111  | 14.09394 | <a href="https://www.genecards.org/cgi-bin/carddisp.pl?gene=HERC2">https://www.genecards.org/cgi-bin/carddisp.pl?gene=HERC2</a>     |

|         |                                                        |                |    |             |          |                                                                                                                                     |
|---------|--------------------------------------------------------|----------------|----|-------------|----------|-------------------------------------------------------------------------------------------------------------------------------------|
| PDP1    | Pyruvate Dehydrogenase Phosphatase Catalytic Subunit 1 | Protein Coding | 47 | GC08P093857 | 14.09057 | <a href="https://www.genecards.org/cgi-bin/carddisp.pl?gene=PDP1">https://www.genecards.org/cgi-bin/carddisp.pl?gene=PDP1</a>       |
| ACP1    | Acid Phosphatase 1 Isoamyl                             | Protein Coding | 44 | GC02P000254 | 14.08999 | <a href="https://www.genecards.org/cgi-bin/carddisp.pl?gene=ACP1">https://www.genecards.org/cgi-bin/carddisp.pl?gene=ACP1</a>       |
| IAH1    | Acetate Hydrolyzing Esterase 1 (Putative)              | Protein Coding | 34 | GC02P009473 | 14.08892 | <a href="https://www.genecards.org/cgi-bin/carddisp.pl?gene=IAH1">https://www.genecards.org/cgi-bin/carddisp.pl?gene=IAH1</a>       |
| COL5A1  | Collagen Type V Alpha 1 Chain                          | Protein Coding | 46 | GC09P134641 | 14.08258 | <a href="https://www.genecards.org/cgi-bin/carddisp.pl?gene=COL5A1">https://www.genecards.org/cgi-bin/carddisp.pl?gene=COL5A1</a>   |
| GLP1R   | Glucagon Like Peptide 1 Receptor                       | Protein Coding | 47 | GC06P039048 | 14.07604 | <a href="https://www.genecards.org/cgi-bin/carddisp.pl?gene=GLP1R">https://www.genecards.org/cgi-bin/carddisp.pl?gene=GLP1R</a>     |
| VLDLR   | Very Low Density Lipoprotein Receptor                  | Protein Coding | 50 | GC09P002611 | 14.07447 | <a href="https://www.genecards.org/cgi-bin/carddisp.pl?gene=VLDLR">https://www.genecards.org/cgi-bin/carddisp.pl?gene=VLDLR</a>     |
| MDH2    | Malate Dehydrogenase 2                                 | Protein Coding | 49 | GC07P076048 | 14.07031 | <a href="https://www.genecards.org/cgi-bin/carddisp.pl?gene=MDH2">https://www.genecards.org/cgi-bin/carddisp.pl?gene=MDH2</a>       |
| RPS6KA3 | Ribosomal Protein S6 Kinase A3                         | Protein Coding | 53 | GC0XM020149 | 14.06671 | <a href="https://www.genecards.org/cgi-bin/carddisp.pl?gene=RPS6KA3">https://www.genecards.org/cgi-bin/carddisp.pl?gene=RPS6KA3</a> |
| ACTN2   | Actinin Alpha 2                                        | Protein Coding | 48 | GC01P236686 | 14.06519 | <a href="https://www.genecards.org/cgi-bin/carddisp.pl?gene=ACTN2">https://www.genecards.org/cgi-bin/carddisp.pl?gene=ACTN2</a>     |
| SULT1A3 | Sulfotransferase Family 1A Member 3                    | Protein Coding | 38 | GC16P030199 | 14.0619  | <a href="https://www.genecards.org/cgi-bin/carddisp.pl?gene=SULT1A3">https://www.genecards.org/cgi-bin/carddisp.pl?gene=SULT1A3</a> |
| FBLN5   | Fibulin 5                                              | Protein Coding | 45 | GC14M091869 | 14.05901 | <a href="https://www.genecards.org/cgi-bin/carddisp.pl?gene=FBLN5">https://www.genecards.org/cgi-bin/carddisp.pl?gene=FBLN5</a>     |
| TFF3    | Trefoil Factor 3                                       | Protein Coding | 41 | GC21M042311 | 14.04886 | <a href="https://www.genecards.org/cgi-bin/carddisp.pl?gene=TFF3">https://www.genecards.org/cgi-bin/carddisp.pl?gene=TFF3</a>       |
| TUBB    | Tubulin Beta Class I                                   | Protein Coding | 50 | GC06P055181 | 14.04616 | <a href="https://www.genecards.org/cgi-bin/carddisp.pl?gene=TUBB">https://www.genecards.org/cgi-bin/carddisp.pl?gene=TUBB</a>       |
| TTC7A   | Tetratricopeptide Repeat Domain 7A                     | Protein Coding | 38 | GC02P046906 | 14.0451  | <a href="https://www.genecards.org/cgi-bin/carddisp.pl?gene=TTC7A">https://www.genecards.org/cgi-bin/carddisp.pl?gene=TTC7A</a>     |
| NRP1    | Neuropilin 1                                           | Protein Coding | 47 | GC10M033177 | 14.03739 | <a href="https://www.genecards.org/cgi-bin/carddisp.pl?gene=NRP1">https://www.genecards.org/cgi-bin/carddisp.pl?gene=NRP1</a>       |
| EPAS1   | Endothelial PAS Domain Protein 1                       | Protein Coding | 50 | GC02P046293 | 14.03069 | <a href="https://www.genecards.org/cgi-bin/carddisp.pl?gene=EPAS1">https://www.genecards.org/cgi-bin/carddisp.pl?gene=EPAS1</a>     |
| ATF6    | Activating Transcription Factor 6                      | Protein Coding | 48 | GC01P161766 | 14.02761 | <a href="https://www.genecards.org/cgi-bin/carddisp.pl?gene=ATF6">https://www.genecards.org/cgi-bin/carddisp.pl?gene=ATF6</a>       |
| PLOD1   | Procollagen-Lysine,2-Oxoglutarate 5-Dioxygenase 1      | Protein Coding | 43 | GC01P011934 | 14.01457 | <a href="https://www.genecards.org/cgi-bin/carddisp.pl?gene=PLOD1">https://www.genecards.org/cgi-bin/carddisp.pl?gene=PLOD1</a>     |
| GMPPB   | GDP-Mannose Pyrophosphorylase B                        | Protein Coding | 44 | GC03M049716 | 14.01319 | <a href="https://www.genecards.org/cgi-bin/carddisp.pl?gene=GMPPB">https://www.genecards.org/cgi-bin/carddisp.pl?gene=GMPPB</a>     |

|        |                                                      |                |    |             |          |                                                                                                                                   |
|--------|------------------------------------------------------|----------------|----|-------------|----------|-----------------------------------------------------------------------------------------------------------------------------------|
| MIR324 | MicroRNA 324                                         | RNA Gene       | 18 | GC17M007223 | 14.00825 | <a href="https://www.genecards.org/cgi-bin/carddisp.pl?gene=MIR324">https://www.genecards.org/cgi-bin/carddisp.pl?gene=MIR324</a> |
| TECR   | Trans-2,3-Enoyl-CoA Reductase                        | Protein Coding | 44 | GC19P014504 | 14.00636 | <a href="https://www.genecards.org/cgi-bin/carddisp.pl?gene=TECR">https://www.genecards.org/cgi-bin/carddisp.pl?gene=TECR</a>     |
| HHEX   | Hematopoietically Expressed Homeobox Protein         | Protein Coding | 43 | GC10P092689 | 14.00541 | <a href="https://www.genecards.org/cgi-bin/carddisp.pl?gene=HHEX">https://www.genecards.org/cgi-bin/carddisp.pl?gene=HHEX</a>     |
| PTPN1  | Tyrosine Phosphatase Non-Receptor Type 1             | Protein Coding | 51 | GC20P050510 | 14.00476 | <a href="https://www.genecards.org/cgi-bin/carddisp.pl?gene=PTPN1">https://www.genecards.org/cgi-bin/carddisp.pl?gene=PTPN1</a>   |
| CLCN2  | Chloride Voltage-Gated Channel 2                     | Protein Coding | 47 | GC03M184346 | 14.00351 | <a href="https://www.genecards.org/cgi-bin/carddisp.pl?gene=CLCN2">https://www.genecards.org/cgi-bin/carddisp.pl?gene=CLCN2</a>   |
| IMPDH1 | Inosine Monophosphate Dehydrogenase 1                | Protein Coding | 50 | GC07M128392 | 13.99338 | <a href="https://www.genecards.org/cgi-bin/carddisp.pl?gene=IMPDH1">https://www.genecards.org/cgi-bin/carddisp.pl?gene=IMPDH1</a> |
| APEX1  | Apurinic/Apyrimidinic Endodeoxyribonuclease 1        | Protein Coding | 45 | GC14P020455 | 13.98484 | <a href="https://www.genecards.org/cgi-bin/carddisp.pl?gene=APEX1">https://www.genecards.org/cgi-bin/carddisp.pl?gene=APEX1</a>   |
| TXNRD2 | Thioredoxin Reductase 2                              | Protein Coding | 48 | GC22M019863 | 13.98362 | <a href="https://www.genecards.org/cgi-bin/carddisp.pl?gene=TXNRD2">https://www.genecards.org/cgi-bin/carddisp.pl?gene=TXNRD2</a> |
| DBI    | Diazepam Binding Inhibitor, Acyl-CoA Binding Protein | Protein Coding | 47 | GC02P119366 | 13.96494 | <a href="https://www.genecards.org/cgi-bin/carddisp.pl?gene=DBI">https://www.genecards.org/cgi-bin/carddisp.pl?gene=DBI</a>       |
| MIR331 | MicroRNA 331                                         | RNA Gene       | 18 | GC12P095308 | 13.96247 | <a href="https://www.genecards.org/cgi-bin/carddisp.pl?gene=MIR331">https://www.genecards.org/cgi-bin/carddisp.pl?gene=MIR331</a> |
| BAG3   | BAG Cochaperone 3                                    | Protein Coding | 45 | GC10P119651 | 13.95862 | <a href="https://www.genecards.org/cgi-bin/carddisp.pl?gene=BAG3">https://www.genecards.org/cgi-bin/carddisp.pl?gene=BAG3</a>     |
| ATN1   | Atrophin 1                                           | Protein Coding | 44 | GC12P011868 | 13.94733 | <a href="https://www.genecards.org/cgi-bin/carddisp.pl?gene=ATN1">https://www.genecards.org/cgi-bin/carddisp.pl?gene=ATN1</a>     |
| COG7   | Component Of Oligomeric Golgi Complex 7              | Protein Coding | 39 | GC16M023388 | 13.94407 | <a href="https://www.genecards.org/cgi-bin/carddisp.pl?gene=COG7">https://www.genecards.org/cgi-bin/carddisp.pl?gene=COG7</a>     |
| LPIN2  | Lipin 2                                              | Protein Coding | 43 | GC18M002916 | 13.94319 | <a href="https://www.genecards.org/cgi-bin/carddisp.pl?gene=LPIN2">https://www.genecards.org/cgi-bin/carddisp.pl?gene=LPIN2</a>   |
| EYS    | Eyes Shut Homolog                                    | Protein Coding | 36 | GC06M063719 | 13.9251  | <a href="https://www.genecards.org/cgi-bin/carddisp.pl?gene=EYS">https://www.genecards.org/cgi-bin/carddisp.pl?gene=EYS</a>       |
| MYB    | MYB Proto-Oncogene, Transcription Factor             | Protein Coding | 51 | GC06P135180 | 13.92469 | <a href="https://www.genecards.org/cgi-bin/carddisp.pl?gene=MYB">https://www.genecards.org/cgi-bin/carddisp.pl?gene=MYB</a>       |
| ABCD2  | ATP Binding Cassette Subfamily D Member 2            | Protein Coding | 41 | GC12M039530 | 13.92256 | <a href="https://www.genecards.org/cgi-bin/carddisp.pl?gene=ABCD2">https://www.genecards.org/cgi-bin/carddisp.pl?gene=ABCD2</a>   |
| BMP7   | Bone Morphogenetic Protein 7                         | Protein Coding | 46 | GC20M057168 | 13.91285 | <a href="https://www.genecards.org/cgi-bin/carddisp.pl?gene=BMP7">https://www.genecards.org/cgi-bin/carddisp.pl?gene=BMP7</a>     |

|          |                                                     |                |    |             |          |                                                                                                                                       |
|----------|-----------------------------------------------------|----------------|----|-------------|----------|---------------------------------------------------------------------------------------------------------------------------------------|
| CCR2     | C-C Motif Chemokine Receptor 2                      | Protein Coding | 45 | GC03P046356 | 13.89845 | <a href="https://www.genecards.org/cgi-bin/carddisp.pl?gene=CCR2">https://www.genecards.org/cgi-bin/carddisp.pl?gene=CCR2</a>         |
| CELA2A   | Chymotrypsin Like Elastase 2A                       | Protein Coding | 39 | GC01P015456 | 13.89703 | <a href="https://www.genecards.org/cgi-bin/carddisp.pl?gene=CELA2A">https://www.genecards.org/cgi-bin/carddisp.pl?gene=CELA2A</a>     |
| OTX2     | Orthodenticle Homeobox 2                            | Protein Coding | 47 | GC14M056799 | 13.89702 | <a href="https://www.genecards.org/cgi-bin/carddisp.pl?gene=OTX2">https://www.genecards.org/cgi-bin/carddisp.pl?gene=OTX2</a>         |
| FOXM1    | Forkhead Box M1                                     | Protein Coding | 45 | GC12M002857 | 13.8897  | <a href="https://www.genecards.org/cgi-bin/carddisp.pl?gene=FOXM1">https://www.genecards.org/cgi-bin/carddisp.pl?gene=FOXM1</a>       |
| PIEZO1   | Piezo Type Mechanosensitive Ion Channel Component 1 | Protein Coding | 38 | GC16M088715 | 13.87765 | <a href="https://www.genecards.org/cgi-bin/carddisp.pl?gene=PIEZO1">https://www.genecards.org/cgi-bin/carddisp.pl?gene=PIEZO1</a>     |
| EPOR     | Erythropoietin Receptor ATP Binding Cassette        | Protein Coding | 48 | GC19M011377 | 13.87609 | <a href="https://www.genecards.org/cgi-bin/carddisp.pl?gene=EPOR">https://www.genecards.org/cgi-bin/carddisp.pl?gene=EPOR</a>         |
| ABCB6    | Subfamily B Member 6 (Langereis Blood Group)        | Protein Coding | 47 | GC02M219209 | 13.87128 | <a href="https://www.genecards.org/cgi-bin/carddisp.pl?gene=ABCB6">https://www.genecards.org/cgi-bin/carddisp.pl?gene=ABCB6</a>       |
| MIR124-1 | MicroRNA 124-1                                      | RNA Gene       | 21 | GC08M009903 | 13.86133 | <a href="https://www.genecards.org/cgi-bin/carddisp.pl?gene=MIR124-1">https://www.genecards.org/cgi-bin/carddisp.pl?gene=MIR124-1</a> |
| GRM1     | Glutamate Metabotropic Receptor 1                   | Protein Coding | 51 | GC06P145973 | 13.85019 | <a href="https://www.genecards.org/cgi-bin/carddisp.pl?gene=GRM1">https://www.genecards.org/cgi-bin/carddisp.pl?gene=GRM1</a>         |
| GPX3     | Glutathione Peroxidase 3                            | Protein Coding | 44 | GC05P150997 | 13.84768 | <a href="https://www.genecards.org/cgi-bin/carddisp.pl?gene=GPX3">https://www.genecards.org/cgi-bin/carddisp.pl?gene=GPX3</a>         |
| PKP2     | Plakophilin 2                                       | Protein Coding | 46 | GC12M032790 | 13.84009 | <a href="https://www.genecards.org/cgi-bin/carddisp.pl?gene=PKP2">https://www.genecards.org/cgi-bin/carddisp.pl?gene=PKP2</a>         |
| MMP8     | Matrix Metalloproteinase 8                          | Protein Coding | 48 | GC11M102617 | 13.83777 | <a href="https://www.genecards.org/cgi-bin/carddisp.pl?gene=MMP8">https://www.genecards.org/cgi-bin/carddisp.pl?gene=MMP8</a>         |
| SLC13A5  | Solute Carrier Family 13 Member 5                   | Protein Coding | 43 | GC17M006684 | 13.83693 | <a href="https://www.genecards.org/cgi-bin/carddisp.pl?gene=SLC13A5">https://www.genecards.org/cgi-bin/carddisp.pl?gene=SLC13A5</a>   |
| RASSF1   | Ras Association Domain Family Member 1              | Protein Coding | 45 | GC03M050329 | 13.83044 | <a href="https://www.genecards.org/cgi-bin/carddisp.pl?gene=RASSF1">https://www.genecards.org/cgi-bin/carddisp.pl?gene=RASSF1</a>     |
| TIMP3    | TIMP Metalloproteinase Inhibitor 3                  | Protein Coding | 46 | GC22P032800 | 13.81891 | <a href="https://www.genecards.org/cgi-bin/carddisp.pl?gene=TIMP3">https://www.genecards.org/cgi-bin/carddisp.pl?gene=TIMP3</a>       |
| TYMS     | Thymidylate Synthetase                              | Protein Coding | 48 | GC18P000657 | 13.81405 | <a href="https://www.genecards.org/cgi-bin/carddisp.pl?gene=TYMS">https://www.genecards.org/cgi-bin/carddisp.pl?gene=TYMS</a>         |
| CXCR1    | C-X-C Motif Chemokine Receptor 1                    | Protein Coding | 44 | GC02M218162 | 13.80201 | <a href="https://www.genecards.org/cgi-bin/carddisp.pl?gene=CXCR1">https://www.genecards.org/cgi-bin/carddisp.pl?gene=CXCR1</a>       |
| TLR1     | Toll Like Receptor 1 Protein C,                     | Protein Coding | 48 | GC04M038793 | 13.80146 | <a href="https://www.genecards.org/cgi-bin/carddisp.pl?gene=TLR1">https://www.genecards.org/cgi-bin/carddisp.pl?gene=TLR1</a>         |
| PROC     | Inactivator Of Coagulation Factors Va And VIIIa     | Protein Coding | 50 | GC02P127418 | 13.79554 | <a href="https://www.genecards.org/cgi-bin/carddisp.pl?gene=PROC">https://www.genecards.org/cgi-bin/carddisp.pl?gene=PROC</a>         |

|          |                                                    |                |    |             |          |                                                                                                                                       |
|----------|----------------------------------------------------|----------------|----|-------------|----------|---------------------------------------------------------------------------------------------------------------------------------------|
| COX15    | Cytochrome C Oxidase Assembly Homolog COX15        | Protein Coding | 43 | GC10M099696 | 13.79495 | <a href="https://www.genecards.org/cgi-bin/carddisp.pl?gene=COX15">https://www.genecards.org/cgi-bin/carddisp.pl?gene=COX15</a>       |
| BAD      | BCL2 Associated Agonist Of Cell Death              | Protein Coding | 47 | GC11M069329 | 13.78966 | <a href="https://www.genecards.org/cgi-bin/carddisp.pl?gene=BAD">https://www.genecards.org/cgi-bin/carddisp.pl?gene=BAD</a>           |
| PRKCB    | Protein Kinase C Beta                              | Protein Coding | 48 | GC16P023967 | 13.78564 | <a href="https://www.genecards.org/cgi-bin/carddisp.pl?gene=PRKCB">https://www.genecards.org/cgi-bin/carddisp.pl?gene=PRKCB</a>       |
| PTGDS    | Prostaglandin D2 Synthase                          | Protein Coding | 45 | GC09P137005 | 13.78054 | <a href="https://www.genecards.org/cgi-bin/carddisp.pl?gene=PTGDS">https://www.genecards.org/cgi-bin/carddisp.pl?gene=PTGDS</a>       |
| VDAC1    | Voltage Dependent Anion Channel 1                  | Protein Coding | 47 | GC05M133975 | 13.77833 | <a href="https://www.genecards.org/cgi-bin/carddisp.pl?gene=VDAC1">https://www.genecards.org/cgi-bin/carddisp.pl?gene=VDAC1</a>       |
| OSM      | Oncostatin M                                       | Protein Coding | 43 | GC22M030262 | 13.76358 | <a href="https://www.genecards.org/cgi-bin/carddisp.pl?gene=OSM">https://www.genecards.org/cgi-bin/carddisp.pl?gene=OSM</a>           |
| SOAT1    | Sterol O-Acyltransferase 1                         | Protein Coding | 45 | GC01P179262 | 13.76268 | <a href="https://www.genecards.org/cgi-bin/carddisp.pl?gene=SOAT1">https://www.genecards.org/cgi-bin/carddisp.pl?gene=SOAT1</a>       |
| IL17RA   | Interleukin 17 Receptor A                          | Protein Coding | 45 | GC22P017116 | 13.74624 | <a href="https://www.genecards.org/cgi-bin/carddisp.pl?gene=IL17RA">https://www.genecards.org/cgi-bin/carddisp.pl?gene=IL17RA</a>     |
| IGFBP2   | Insulin Like Growth Factor Binding Protein 2       | Protein Coding | 44 | GC02P216632 | 13.74202 | <a href="https://www.genecards.org/cgi-bin/carddisp.pl?gene=IGFBP2">https://www.genecards.org/cgi-bin/carddisp.pl?gene=IGFBP2</a>     |
| MMP12    | Matrix Metalloproteinase 12                        | Protein Coding | 45 | GC11M102862 | 13.73298 | <a href="https://www.genecards.org/cgi-bin/carddisp.pl?gene=MMP12">https://www.genecards.org/cgi-bin/carddisp.pl?gene=MMP12</a>       |
| TAF1     | TATA-Box Binding Protein Associated Factor 1       | Protein Coding | 46 | GC0XP071366 | 13.72882 | <a href="https://www.genecards.org/cgi-bin/carddisp.pl?gene=TAF1">https://www.genecards.org/cgi-bin/carddisp.pl?gene=TAF1</a>         |
| KIAA0753 | KIAA0753                                           | Protein Coding | 34 | GC17M006578 | 13.72798 | <a href="https://www.genecards.org/cgi-bin/carddisp.pl?gene=KIAA0753">https://www.genecards.org/cgi-bin/carddisp.pl?gene=KIAA0753</a> |
| PRDM16   | PR/SET Domain 16                                   | Protein Coding | 45 | GC01P003068 | 13.72771 | <a href="https://www.genecards.org/cgi-bin/carddisp.pl?gene=PRDM16">https://www.genecards.org/cgi-bin/carddisp.pl?gene=PRDM16</a>     |
| RASGRP1  | RAS Guanyl Releasing Protein 1                     | Protein Coding | 48 | GC15M038488 | 13.72265 | <a href="https://www.genecards.org/cgi-bin/carddisp.pl?gene=RASGRP1">https://www.genecards.org/cgi-bin/carddisp.pl?gene=RASGRP1</a>   |
| C1S      | Complement C1s                                     | Protein Coding | 47 | GC12P011876 | 13.71999 | <a href="https://www.genecards.org/cgi-bin/carddisp.pl?gene=C1S">https://www.genecards.org/cgi-bin/carddisp.pl?gene=C1S</a>           |
| BPTF     | Bromodomain PHD Finger Transcription Factor        | Protein Coding | 40 | GC17P067825 | 13.70828 | <a href="https://www.genecards.org/cgi-bin/carddisp.pl?gene=BPTF">https://www.genecards.org/cgi-bin/carddisp.pl?gene=BPTF</a>         |
| PTH1H    | Parathyroid Hormone Like Hormone                   | Protein Coding | 46 | GC12M027959 | 13.70041 | <a href="https://www.genecards.org/cgi-bin/carddisp.pl?gene=PTH1H">https://www.genecards.org/cgi-bin/carddisp.pl?gene=PTH1H</a>       |
| CASK     | Calcium/Calmodulin Dependent Serine Protein Kinase | Protein Coding | 49 | GC0XM041514 | 13.69434 | <a href="https://www.genecards.org/cgi-bin/carddisp.pl?gene=CASK">https://www.genecards.org/cgi-bin/carddisp.pl?gene=CASK</a>         |

|         |                                           |                |    |             |          |                                                                                                                                     |
|---------|-------------------------------------------|----------------|----|-------------|----------|-------------------------------------------------------------------------------------------------------------------------------------|
| CCKAR   | Cholecystokinin A Receptor                | Protein Coding | 47 | GC04M026483 | 13.68479 | <a href="https://www.genecards.org/cgi-bin/carddisp.pl?gene=CCKAR">https://www.genecards.org/cgi-bin/carddisp.pl?gene=CCKAR</a>     |
| SUOX    | Sulfite Oxidase                           | Protein Coding | 46 | GC12P055997 | 13.67192 | <a href="https://www.genecards.org/cgi-bin/carddisp.pl?gene=SUOX">https://www.genecards.org/cgi-bin/carddisp.pl?gene=SUOX</a>       |
| AKR1B10 | Aldo-Keto Reductase Family 1 Member B10   | Protein Coding | 44 | GC07P134527 | 13.6697  | <a href="https://www.genecards.org/cgi-bin/carddisp.pl?gene=AKR1B10">https://www.genecards.org/cgi-bin/carddisp.pl?gene=AKR1B10</a> |
| HAVCR1  | Hepatitis A Virus Cellular Receptor 1 DNA | Protein Coding | 42 | GC05M157028 | 13.65866 | <a href="https://www.genecards.org/cgi-bin/carddisp.pl?gene=HAVCR1">https://www.genecards.org/cgi-bin/carddisp.pl?gene=HAVCR1</a>   |
| POLD1   | Polymerase Delta 1, Catalytic Subunit     | Protein Coding | 47 | GC19P050385 | 13.6574  | <a href="https://www.genecards.org/cgi-bin/carddisp.pl?gene=POLD1">https://www.genecards.org/cgi-bin/carddisp.pl?gene=POLD1</a>     |
| TPI1    | Triosephosphate Isomerase 1               | Protein Coding | 48 | GC12P011857 | 13.65639 | <a href="https://www.genecards.org/cgi-bin/carddisp.pl?gene=TPI1">https://www.genecards.org/cgi-bin/carddisp.pl?gene=TPI1</a>       |
| DDX58   | DEXD/H-Box Helicase 58                    | Protein Coding | 47 | GC09M032455 | 13.6557  | <a href="https://www.genecards.org/cgi-bin/carddisp.pl?gene=DDX58">https://www.genecards.org/cgi-bin/carddisp.pl?gene=DDX58</a>     |
| CASP2   | Caspase 2                                 | Protein Coding | 50 | GC07P145813 | 13.6534  | <a href="https://www.genecards.org/cgi-bin/carddisp.pl?gene=CASP2">https://www.genecards.org/cgi-bin/carddisp.pl?gene=CASP2</a>     |
| HK2     | Hexokinase 2                              | Protein Coding | 48 | GC02P074833 | 13.6505  | <a href="https://www.genecards.org/cgi-bin/carddisp.pl?gene=HK2">https://www.genecards.org/cgi-bin/carddisp.pl?gene=HK2</a>         |
| TMEM138 | Transmembrane Protein 138                 | Protein Coding | 37 | GC11P061362 | 13.64693 | <a href="https://www.genecards.org/cgi-bin/carddisp.pl?gene=TMEM138">https://www.genecards.org/cgi-bin/carddisp.pl?gene=TMEM138</a> |
| PLD3    | Phospholipase D Family Member 3           | Protein Coding | 43 | GC19P040348 | 13.62637 | <a href="https://www.genecards.org/cgi-bin/carddisp.pl?gene=PLD3">https://www.genecards.org/cgi-bin/carddisp.pl?gene=PLD3</a>       |
| PDHA1   | Pyruvate Dehydrogenase E1 Subunit Alpha 1 | Protein Coding | 50 | GC0XP019343 | 13.6236  | <a href="https://www.genecards.org/cgi-bin/carddisp.pl?gene=PDHA1">https://www.genecards.org/cgi-bin/carddisp.pl?gene=PDHA1</a>     |
| PDE4A   | Phosphodiesterase 4A                      | Protein Coding | 45 | GC19P010416 | 13.61808 | <a href="https://www.genecards.org/cgi-bin/carddisp.pl?gene=PDE4A">https://www.genecards.org/cgi-bin/carddisp.pl?gene=PDE4A</a>     |
| CD86    | CD86 Molecule                             | Protein Coding | 44 | GC03P122055 | 13.61566 | <a href="https://www.genecards.org/cgi-bin/carddisp.pl?gene=CD86">https://www.genecards.org/cgi-bin/carddisp.pl?gene=CD86</a>       |
| IL4R    | Interleukin 4 Receptor Family With        | Protein Coding | 48 | GC16P027325 | 13.6084  | <a href="https://www.genecards.org/cgi-bin/carddisp.pl?gene=IL4R">https://www.genecards.org/cgi-bin/carddisp.pl?gene=IL4R</a>       |
| FAM13A  | Sequence Similarity 13 Member A           | Protein Coding | 38 | GC04M088725 | 13.58992 | <a href="https://www.genecards.org/cgi-bin/carddisp.pl?gene=FAM13A">https://www.genecards.org/cgi-bin/carddisp.pl?gene=FAM13A</a>   |
| GNRH1   | Gonadotropin Releasing Hormone 1          | Protein Coding | 43 | GC08M025419 | 13.58939 | <a href="https://www.genecards.org/cgi-bin/carddisp.pl?gene=GNRH1">https://www.genecards.org/cgi-bin/carddisp.pl?gene=GNRH1</a>     |
| WNT3A   | Wnt Family Member 3A Aldehyde             | Protein Coding | 48 | GC01P228466 | 13.57946 | <a href="https://www.genecards.org/cgi-bin/carddisp.pl?gene=WNT3A">https://www.genecards.org/cgi-bin/carddisp.pl?gene=WNT3A</a>     |
| ALDH5A1 | Dehydrogenase 5 Family Member A1          | Protein Coding | 47 | GC06P024494 | 13.5575  | <a href="https://www.genecards.org/cgi-bin/carddisp.pl?gene=ALDH5A1">https://www.genecards.org/cgi-bin/carddisp.pl?gene=ALDH5A1</a> |
| POSTN   | Periostin                                 | Protein Coding | 44 | GC13M037562 | 13.55501 | <a href="https://www.genecards.org/cgi-bin/carddisp.pl?gene=POSTN">https://www.genecards.org/cgi-bin/carddisp.pl?gene=POSTN</a>     |
| TTC8    | Tetratricopeptide Repeat Domain 8         | Protein Coding | 40 | GC14P089293 | 13.54434 | <a href="https://www.genecards.org/cgi-bin/carddisp.pl?gene=TTC8">https://www.genecards.org/cgi-bin/carddisp.pl?gene=TTC8</a>       |

|          |                                                                    |                   |    |                 |          |                                                                                                                                       |
|----------|--------------------------------------------------------------------|-------------------|----|-----------------|----------|---------------------------------------------------------------------------------------------------------------------------------------|
| ECI2     | Enoyl-CoA<br>Delta<br>Isomerase 2                                  | Protein<br>Coding | 41 | GC06M004<br>115 | 13.54339 | <a href="https://www.genecards.org/cgi-bin/carddisp.pl?gene=ECI2">https://www.genecards.org/cgi-bin/carddisp.pl?gene=ECI2</a>         |
| COL11A2  | Collagen Type<br>XI Alpha 2<br>Chain                               | Protein<br>Coding | 45 | GC06M033<br>162 | 13.53173 | <a href="https://www.genecards.org/cgi-bin/carddisp.pl?gene=COL11A2">https://www.genecards.org/cgi-bin/carddisp.pl?gene=COL11A2</a>   |
| SLC26A4  | Solute Carrier<br>Family 26<br>Member 4                            | Protein<br>Coding | 44 | GC07P1076<br>60 | 13.51274 | <a href="https://www.genecards.org/cgi-bin/carddisp.pl?gene=SLC26A4">https://www.genecards.org/cgi-bin/carddisp.pl?gene=SLC26A4</a>   |
| PPBP     | Pro-Platelet<br>Basic Protein<br>Aldehyde                          | Protein<br>Coding | 44 | GC04M073<br>986 | 13.49522 | <a href="https://www.genecards.org/cgi-bin/carddisp.pl?gene=PPBP">https://www.genecards.org/cgi-bin/carddisp.pl?gene=PPBP</a>         |
| ALDH18A1 | Dehydrogenase<br>18 Family<br>Member A1<br>Potassium<br>Inwardly   | Protein<br>Coding | 46 | GC10M095<br>605 | 13.49513 | <a href="https://www.genecards.org/cgi-bin/carddisp.pl?gene=ALDH18A1">https://www.genecards.org/cgi-bin/carddisp.pl?gene=ALDH18A1</a> |
| KCNJ1    | Rectifying<br>Channel<br>Subfamily J<br>Member 1<br>Ts Translation | Protein<br>Coding | 48 | GC11M128<br>741 | 13.49502 | <a href="https://www.genecards.org/cgi-bin/carddisp.pl?gene=KCNJ1">https://www.genecards.org/cgi-bin/carddisp.pl?gene=KCNJ1</a>       |
| TSFM     | Elongation<br>Factor,<br>Mitochondrial                             | Protein<br>Coding | 44 | GC12P0577<br>78 | 13.49161 | <a href="https://www.genecards.org/cgi-bin/carddisp.pl?gene=TSFM">https://www.genecards.org/cgi-bin/carddisp.pl?gene=TSFM</a>         |
| ANGPTL8  | Angiopoietin<br>Like 8                                             | Protein<br>Coding | 29 | GC19P0112<br>38 | 13.48359 | <a href="https://www.genecards.org/cgi-bin/carddisp.pl?gene=ANGPTL8">https://www.genecards.org/cgi-bin/carddisp.pl?gene=ANGPTL8</a>   |
| OGDH     | Oxoglutarate<br>Dehydrogenase                                      | Protein<br>Coding | 46 | GC07P0446<br>06 | 13.48221 | <a href="https://www.genecards.org/cgi-bin/carddisp.pl?gene=OGDH">https://www.genecards.org/cgi-bin/carddisp.pl?gene=OGDH</a>         |
| FOXA2    | Forkhead Box<br>A2                                                 | Protein<br>Coding | 45 | GC20M022<br>581 | 13.48104 | <a href="https://www.genecards.org/cgi-bin/carddisp.pl?gene=FOXA2">https://www.genecards.org/cgi-bin/carddisp.pl?gene=FOXA2</a>       |
| FOXP1    | Forkhead Box<br>P1                                                 | Protein<br>Coding | 46 | GC03M070<br>926 | 13.4762  | <a href="https://www.genecards.org/cgi-bin/carddisp.pl?gene=FOXP1">https://www.genecards.org/cgi-bin/carddisp.pl?gene=FOXP1</a>       |
| MSTN     | Myostatin                                                          | Protein<br>Coding | 45 | GC02M190<br>055 | 13.47489 | <a href="https://www.genecards.org/cgi-bin/carddisp.pl?gene=MSTN">https://www.genecards.org/cgi-bin/carddisp.pl?gene=MSTN</a>         |
| CTSK     | Cathepsin K                                                        | Protein<br>Coding | 50 | GC01M150<br>837 | 13.46922 | <a href="https://www.genecards.org/cgi-bin/carddisp.pl?gene=CTSK">https://www.genecards.org/cgi-bin/carddisp.pl?gene=CTSK</a>         |
| CPLANE1  | Ciliogenesis<br>And Planar<br>Polarity Effector<br>1               | Protein<br>Coding | 27 | GC05M037<br>084 | 13.45301 | <a href="https://www.genecards.org/cgi-bin/carddisp.pl?gene=CPLANE1">https://www.genecards.org/cgi-bin/carddisp.pl?gene=CPLANE1</a>   |
| IL18R1   | Interleukin 18<br>Receptor 1                                       | Protein<br>Coding | 43 | GC02P1023<br>11 | 13.44806 | <a href="https://www.genecards.org/cgi-bin/carddisp.pl?gene=IL18R1">https://www.genecards.org/cgi-bin/carddisp.pl?gene=IL18R1</a>     |
| NAGS     | N-<br>Acetylglutamat<br>e Synthase                                 | Protein<br>Coding | 43 | GC17P0440<br>04 | 13.43669 | <a href="https://www.genecards.org/cgi-bin/carddisp.pl?gene=NAGS">https://www.genecards.org/cgi-bin/carddisp.pl?gene=NAGS</a>         |
| SLC52A3  | Solute Carrier<br>Family 52<br>Member 3                            | Protein<br>Coding | 39 | GC20M000<br>741 | 13.42792 | <a href="https://www.genecards.org/cgi-bin/carddisp.pl?gene=SLC52A3">https://www.genecards.org/cgi-bin/carddisp.pl?gene=SLC52A3</a>   |
| RHD      | Rh Blood<br>Group D<br>Antigen                                     | Protein<br>Coding | 41 | GC01P0252<br>72 | 13.41545 | <a href="https://www.genecards.org/cgi-bin/carddisp.pl?gene=RHD">https://www.genecards.org/cgi-bin/carddisp.pl?gene=RHD</a>           |
| E2F1     | E2F<br>Transcription<br>Factor 1                                   | Protein<br>Coding | 44 | GC20M033<br>675 | 13.39812 | <a href="https://www.genecards.org/cgi-bin/carddisp.pl?gene=E2F1">https://www.genecards.org/cgi-bin/carddisp.pl?gene=E2F1</a>         |
| NF2      | Neurofibromin<br>2                                                 | Protein<br>Coding | 49 | GC22P0296<br>03 | 13.3971  | <a href="https://www.genecards.org/cgi-bin/carddisp.pl?gene=NF2">https://www.genecards.org/cgi-bin/carddisp.pl?gene=NF2</a>           |



|               |                                                                                 |                   |    |                 |          |                                                                                                                                         |
|---------------|---------------------------------------------------------------------------------|-------------------|----|-----------------|----------|-----------------------------------------------------------------------------------------------------------------------------------------|
| MRE11         | MRE11<br>Homolog,<br>Double Strand<br>Break Repair<br>Nuclease                  | Protein<br>Coding | 42 | GC11M094<br>875 | 13.39581 | <a href="https://www.genecards.org/cgi-bin/carddisp.pl?gene=MRE11">https://www.genecards.org/cgi-bin/carddisp.pl?gene=MRE11</a>         |
| CEP104        | Centrosomal<br>Protein 104                                                      | Protein<br>Coding | 36 | GC01M003<br>812 | 13.39383 | <a href="https://www.genecards.org/cgi-bin/carddisp.pl?gene=CEP104">https://www.genecards.org/cgi-bin/carddisp.pl?gene=CEP104</a>       |
| EZR           | Ezrin                                                                           | Protein<br>Coding | 46 | GC06M158<br>765 | 13.38914 | <a href="https://www.genecards.org/cgi-bin/carddisp.pl?gene=EZR">https://www.genecards.org/cgi-bin/carddisp.pl?gene=EZR</a>             |
| TRPC6         | Transient<br>Receptor<br>Potential<br>Cation Channel<br>Subfamily C<br>Member 6 | Protein<br>Coding | 49 | GC11M101<br>451 | 13.38856 | <a href="https://www.genecards.org/cgi-bin/carddisp.pl?gene=TRPC6">https://www.genecards.org/cgi-bin/carddisp.pl?gene=TRPC6</a>         |
| CLCNKA        | Chloride<br>Voltage-Gated<br>Channel Ka                                         | Protein<br>Coding | 41 | GC01P0160<br>18 | 13.38671 | <a href="https://www.genecards.org/cgi-bin/carddisp.pl?gene=CLCNKA">https://www.genecards.org/cgi-bin/carddisp.pl?gene=CLCNKA</a>       |
| CANX          | Calnexin                                                                        | Protein<br>Coding | 45 | GC05P1796<br>78 | 13.38223 | <a href="https://www.genecards.org/cgi-bin/carddisp.pl?gene=CANX">https://www.genecards.org/cgi-bin/carddisp.pl?gene=CANX</a>           |
| MIRLET7A<br>1 | MicroRNA Let-<br>7a-1                                                           | RNA<br>Gene       | 21 | GC09P0941<br>75 | 13.37969 | <a href="https://www.genecards.org/cgi-bin/carddisp.pl?gene=MIRLET7A1">https://www.genecards.org/cgi-bin/carddisp.pl?gene=MIRLET7A1</a> |
| COL6A1        | Collagen Type<br>VI Alpha 1<br>Chain                                            | Protein<br>Coding | 44 | GC21P0459<br>81 | 13.37753 | <a href="https://www.genecards.org/cgi-bin/carddisp.pl?gene=COL6A1">https://www.genecards.org/cgi-bin/carddisp.pl?gene=COL6A1</a>       |
| RNU4ATA<br>C  | RNA, U4atac<br>Small Nuclear<br>(U12-<br>Dependent<br>Splicing)                 | RNA<br>Gene       | 20 | GC02P1215<br>39 | 13.37517 | <a href="https://www.genecards.org/cgi-bin/carddisp.pl?gene=RNU4ATAC">https://www.genecards.org/cgi-bin/carddisp.pl?gene=RNU4ATAC</a>   |
| IL33          | Interleukin 33                                                                  | Protein<br>Coding | 40 | GC09P0062<br>06 | 13.36874 | <a href="https://www.genecards.org/cgi-bin/carddisp.pl?gene=IL33">https://www.genecards.org/cgi-bin/carddisp.pl?gene=IL33</a>           |
| ADSL          | Adenylosuccina<br>te Lyase                                                      | Protein<br>Coding | 48 | GC22P0403<br>46 | 13.35884 | <a href="https://www.genecards.org/cgi-bin/carddisp.pl?gene=ADSL">https://www.genecards.org/cgi-bin/carddisp.pl?gene=ADSL</a>           |
| CHPT1         | Choline<br>Phosphotransfe<br>rase 1                                             | Protein<br>Coding | 40 | GC12P1016<br>96 | 13.34262 | <a href="https://www.genecards.org/cgi-bin/carddisp.pl?gene=CHPT1">https://www.genecards.org/cgi-bin/carddisp.pl?gene=CHPT1</a>         |
| MEF2C         | Myocyte<br>Enhancer<br>Factor 2C                                                | Protein<br>Coding | 50 | GC05M088<br>718 | 13.34108 | <a href="https://www.genecards.org/cgi-bin/carddisp.pl?gene=MEF2C">https://www.genecards.org/cgi-bin/carddisp.pl?gene=MEF2C</a>         |
| HAVCR2        | Hepatitis A<br>Virus Cellular<br>Receptor 2                                     | Protein<br>Coding | 44 | GC05M157<br>063 | 13.34015 | <a href="https://www.genecards.org/cgi-bin/carddisp.pl?gene=HAVCR2">https://www.genecards.org/cgi-bin/carddisp.pl?gene=HAVCR2</a>       |
| HGD           | Homogentisate<br>1,2-<br>Dioxygenase                                            | Protein<br>Coding | 45 | GC03M120<br>628 | 13.3281  | <a href="https://www.genecards.org/cgi-bin/carddisp.pl?gene=HGD">https://www.genecards.org/cgi-bin/carddisp.pl?gene=HGD</a>             |
| NDUFAB1       | NADH:Ubiquin<br>one<br>Oxidoreductase<br>Subunit AB1                            | Protein<br>Coding | 41 | GC16M023<br>582 | 13.32784 | <a href="https://www.genecards.org/cgi-bin/carddisp.pl?gene=NDUFAB1">https://www.genecards.org/cgi-bin/carddisp.pl?gene=NDUFAB1</a>     |
| GLI1          | GLI Family Zinc<br>Finger 1                                                     | Protein<br>Coding | 48 | GC12P0574<br>60 | 13.3216  | <a href="https://www.genecards.org/cgi-bin/carddisp.pl?gene=GLI1">https://www.genecards.org/cgi-bin/carddisp.pl?gene=GLI1</a>           |
| SLC7A7        | Solute Carrier<br>Family 7<br>Member 7                                          | Protein<br>Coding | 47 | GC14M022<br>773 | 13.31963 | <a href="https://www.genecards.org/cgi-bin/carddisp.pl?gene=SLC7A7">https://www.genecards.org/cgi-bin/carddisp.pl?gene=SLC7A7</a>       |

|         |                                                                     |                   |    |                 |          |                                                                                                                                     |
|---------|---------------------------------------------------------------------|-------------------|----|-----------------|----------|-------------------------------------------------------------------------------------------------------------------------------------|
| UGCG    | UDP-Glucose<br>Ceramide<br>Glucosyltransferase                      | Protein<br>Coding | 43 | GC09P1118<br>96 | 13.31046 | <a href="https://www.genecards.org/cgi-bin/carddisp.pl?gene=UGCG">https://www.genecards.org/cgi-bin/carddisp.pl?gene=UGCG</a>       |
| ANPEP   | Alanyl<br>Aminopeptidase, Membrane<br>Membrane                      | Protein<br>Coding | 50 | GC15M089<br>784 | 13.30516 | <a href="https://www.genecards.org/cgi-bin/carddisp.pl?gene=ANPEP">https://www.genecards.org/cgi-bin/carddisp.pl?gene=ANPEP</a>     |
| MBOAT7  | Bound O-<br>Acyltransferase<br>Domain<br>Containing 7               | Protein<br>Coding | 41 | GC19M054<br>173 | 13.30096 | <a href="https://www.genecards.org/cgi-bin/carddisp.pl?gene=MBOAT7">https://www.genecards.org/cgi-bin/carddisp.pl?gene=MBOAT7</a>   |
| HPX     | Hemopexin                                                           | Protein<br>Coding | 40 | GC11M006<br>435 | 13.30056 | <a href="https://www.genecards.org/cgi-bin/carddisp.pl?gene=HPX">https://www.genecards.org/cgi-bin/carddisp.pl?gene=HPX</a>         |
| CEP41   | Centrosomal<br>Protein 41                                           | Protein<br>Coding | 39 | GC07M130<br>393 | 13.29879 | <a href="https://www.genecards.org/cgi-bin/carddisp.pl?gene=CEP41">https://www.genecards.org/cgi-bin/carddisp.pl?gene=CEP41</a>     |
| DMPK    | DM1 Protein<br>Kinase                                               | Protein<br>Coding | 49 | GC19M045<br>769 | 13.28736 | <a href="https://www.genecards.org/cgi-bin/carddisp.pl?gene=DMPK">https://www.genecards.org/cgi-bin/carddisp.pl?gene=DMPK</a>       |
| NUP107  | Nucleoporin<br>107                                                  | Protein<br>Coding | 43 | GC12P0686<br>86 | 13.28543 | <a href="https://www.genecards.org/cgi-bin/carddisp.pl?gene=NUP107">https://www.genecards.org/cgi-bin/carddisp.pl?gene=NUP107</a>   |
| PKM     | Pyruvate Kinase<br>M1/2<br>Arachidonate                             | Protein<br>Coding | 46 | GC15M072<br>199 | 13.28074 | <a href="https://www.genecards.org/cgi-bin/carddisp.pl?gene=PKM">https://www.genecards.org/cgi-bin/carddisp.pl?gene=PKM</a>         |
| ALOX5AP | 5-<br>Lipoxygenase<br>Activating<br>Protein                         | Protein<br>Coding | 45 | GC13P0307<br>13 | 13.27863 | <a href="https://www.genecards.org/cgi-bin/carddisp.pl?gene=ALOX5AP">https://www.genecards.org/cgi-bin/carddisp.pl?gene=ALOX5AP</a> |
| PICALM  | Phosphatidylin<br>ositol Binding<br>Clathrin<br>Assembly<br>Protein | Protein<br>Coding | 44 | GC11M085<br>957 | 13.27776 | <a href="https://www.genecards.org/cgi-bin/carddisp.pl?gene=PICALM">https://www.genecards.org/cgi-bin/carddisp.pl?gene=PICALM</a>   |
| DHRS2   | Dehydrogenase<br>/Reductase 2                                       | Protein<br>Coding | 40 | GC14P0263<br>12 | 13.27757 | <a href="https://www.genecards.org/cgi-bin/carddisp.pl?gene=DHRS2">https://www.genecards.org/cgi-bin/carddisp.pl?gene=DHRS2</a>     |
| GNA11   | G Protein<br>Subunit Alpha<br>11                                    | Protein<br>Coding | 48 | GC19P0030<br>94 | 13.27677 | <a href="https://www.genecards.org/cgi-bin/carddisp.pl?gene=GNA11">https://www.genecards.org/cgi-bin/carddisp.pl?gene=GNA11</a>     |
| POU5F1  | POU Class 5<br>Homeobox 1                                           | Protein<br>Coding | 47 | GC06M046<br>826 | 13.27455 | <a href="https://www.genecards.org/cgi-bin/carddisp.pl?gene=POU5F1">https://www.genecards.org/cgi-bin/carddisp.pl?gene=POU5F1</a>   |
| DHX30   | DEXH-Box<br>Helicase 30<br>NADH:Ubiquin                             | Protein<br>Coding | 41 | GC03P0478<br>02 | 13.26659 | <a href="https://www.genecards.org/cgi-bin/carddisp.pl?gene=DHX30">https://www.genecards.org/cgi-bin/carddisp.pl?gene=DHX30</a>     |
| NDUFA11 | one<br>Oxidoreductase<br>Subunit A11                                | Protein<br>Coding | 38 | GC19M005<br>891 | 13.26033 | <a href="https://www.genecards.org/cgi-bin/carddisp.pl?gene=NDUFA11">https://www.genecards.org/cgi-bin/carddisp.pl?gene=NDUFA11</a> |
| RARS1   | Arginyl-TRNA<br>Synthetase 1                                        | Protein<br>Coding | 37 | GC05P1684<br>87 | 13.24706 | <a href="https://www.genecards.org/cgi-bin/carddisp.pl?gene=RARS1">https://www.genecards.org/cgi-bin/carddisp.pl?gene=RARS1</a>     |
| LYST    | Lysosomal<br>Trafficking<br>Regulator                               | Protein<br>Coding | 38 | GC01M235<br>661 | 13.2379  | <a href="https://www.genecards.org/cgi-bin/carddisp.pl?gene=LYST">https://www.genecards.org/cgi-bin/carddisp.pl?gene=LYST</a>       |
| AAAS    | Aladin WD<br>Repeat<br>Nucleoporin                                  | Protein<br>Coding | 42 | GC12M053<br>307 | 13.23345 | <a href="https://www.genecards.org/cgi-bin/carddisp.pl?gene=AAAS">https://www.genecards.org/cgi-bin/carddisp.pl?gene=AAAS</a>       |
| VRK1    | VRK<br>Serine/Threonine<br>Kinase 1                                 | Protein<br>Coding | 49 | GC14P0967<br>97 | 13.2327  | <a href="https://www.genecards.org/cgi-bin/carddisp.pl?gene=VRK1">https://www.genecards.org/cgi-bin/carddisp.pl?gene=VRK1</a>       |
| CYC1    | Cytochrome C1                                                       | Protein<br>Coding | 46 | GC08P1440<br>95 | 13.22562 | <a href="https://www.genecards.org/cgi-bin/carddisp.pl?gene=CYC1">https://www.genecards.org/cgi-bin/carddisp.pl?gene=CYC1</a>       |

|         |                                                |                   |    |             |          |                                                                                                                                     |
|---------|------------------------------------------------|-------------------|----|-------------|----------|-------------------------------------------------------------------------------------------------------------------------------------|
| NDE1    | NudE Neurodevelopment Protein 1                | Protein Coding    | 44 | GC16P015661 | 13.21717 | <a href="https://www.genecards.org/cgi-bin/carddisp.pl?gene=NDE1">https://www.genecards.org/cgi-bin/carddisp.pl?gene=NDE1</a>       |
| MIR152  | MicroRNA 152                                   | RNA Gene          | 20 | GC17M048037 | 13.21089 | <a href="https://www.genecards.org/cgi-bin/carddisp.pl?gene=MIR152">https://www.genecards.org/cgi-bin/carddisp.pl?gene=MIR152</a>   |
| GH-LCR  | Growth Hormone Locus Control Region            | Biological Region | 2  | GC17P063917 | 13.20954 | <a href="https://www.genecards.org/cgi-bin/carddisp.pl?gene=GH-LCR">https://www.genecards.org/cgi-bin/carddisp.pl?gene=GH-LCR</a>   |
| DHDDS   | Dehydrodolichyl Diphosphate Synthase Subunit   | Protein Coding    | 43 | GC01P026432 | 13.20563 | <a href="https://www.genecards.org/cgi-bin/carddisp.pl?gene=DHDDS">https://www.genecards.org/cgi-bin/carddisp.pl?gene=DHDDS</a>     |
| CCKBR   | Cholecystokinin B Receptor                     | Protein Coding    | 45 | GC11P006259 | 13.20471 | <a href="https://www.genecards.org/cgi-bin/carddisp.pl?gene=CCKBR">https://www.genecards.org/cgi-bin/carddisp.pl?gene=CCKBR</a>     |
| RAB27A  | RAB27A, Member RAS Oncogene Family             | Protein Coding    | 49 | GC15M055202 | 13.1928  | <a href="https://www.genecards.org/cgi-bin/carddisp.pl?gene=RAB27A">https://www.genecards.org/cgi-bin/carddisp.pl?gene=RAB27A</a>   |
| OLR1    | Oxidized Low Density Lipoprotein Receptor 1    | Protein Coding    | 44 | GC12M015685 | 13.18879 | <a href="https://www.genecards.org/cgi-bin/carddisp.pl?gene=OLR1">https://www.genecards.org/cgi-bin/carddisp.pl?gene=OLR1</a>       |
| XRCC4   | X-Ray Repair Cross Complementing 4             | Protein Coding    | 44 | GC05P083077 | 13.18428 | <a href="https://www.genecards.org/cgi-bin/carddisp.pl?gene=XRCC4">https://www.genecards.org/cgi-bin/carddisp.pl?gene=XRCC4</a>     |
| MAG     | Myelin Associated Glycoprotein                 | Protein Coding    | 46 | GC19P035292 | 13.173   | <a href="https://www.genecards.org/cgi-bin/carddisp.pl?gene=MAG">https://www.genecards.org/cgi-bin/carddisp.pl?gene=MAG</a>         |
| YY1AP1  | YY1 Associated Protein 1                       | Protein Coding    | 39 | GC01M155659 | 13.17136 | <a href="https://www.genecards.org/cgi-bin/carddisp.pl?gene=YY1AP1">https://www.genecards.org/cgi-bin/carddisp.pl?gene=YY1AP1</a>   |
| CNTF    | Ciliary Neurotrophic Factor                    | Protein Coding    | 42 | GC11P058622 | 13.16641 | <a href="https://www.genecards.org/cgi-bin/carddisp.pl?gene=CNTF">https://www.genecards.org/cgi-bin/carddisp.pl?gene=CNTF</a>       |
| ASAH2   | N-Acylsphingosine Amidohydrolase 2             | Protein Coding    | 42 | GC10M050182 | 13.16553 | <a href="https://www.genecards.org/cgi-bin/carddisp.pl?gene=ASAH2">https://www.genecards.org/cgi-bin/carddisp.pl?gene=ASAH2</a>     |
| TFEB    | Transcription Factor EB                        | Protein Coding    | 43 | GC06M047093 | 13.15278 | <a href="https://www.genecards.org/cgi-bin/carddisp.pl?gene=TFEB">https://www.genecards.org/cgi-bin/carddisp.pl?gene=TFEB</a>       |
| CSNK2A1 | Casein Kinase 2 Alpha 1                        | Protein Coding    | 52 | GC20M000472 | 13.13254 | <a href="https://www.genecards.org/cgi-bin/carddisp.pl?gene=CSNK2A1">https://www.genecards.org/cgi-bin/carddisp.pl?gene=CSNK2A1</a> |
| ANXA1   | Annexin A1                                     | Protein Coding    | 50 | GC09P073151 | 13.1302  | <a href="https://www.genecards.org/cgi-bin/carddisp.pl?gene=ANXA1">https://www.genecards.org/cgi-bin/carddisp.pl?gene=ANXA1</a>     |
| MIR139  | MicroRNA 139                                   | RNA Gene          | 19 | GC11M072615 | 13.12156 | <a href="https://www.genecards.org/cgi-bin/carddisp.pl?gene=MIR139">https://www.genecards.org/cgi-bin/carddisp.pl?gene=MIR139</a>   |
| TCAP    | Titin-Cap                                      | Protein Coding    | 43 | GC17P039664 | 13.12141 | <a href="https://www.genecards.org/cgi-bin/carddisp.pl?gene=TCAP">https://www.genecards.org/cgi-bin/carddisp.pl?gene=TCAP</a>       |
| FLVCR1  | FLVCR Heme Transporter 1                       | Protein Coding    | 41 | GC01P212858 | 13.12076 | <a href="https://www.genecards.org/cgi-bin/carddisp.pl?gene=FLVCR1">https://www.genecards.org/cgi-bin/carddisp.pl?gene=FLVCR1</a>   |
| FURIN   | Furin, Paired Basic Amino Acid Cleaving Enzyme | Protein Coding    | 47 | GC15P090868 | 13.11329 | <a href="https://www.genecards.org/cgi-bin/carddisp.pl?gene=FURIN">https://www.genecards.org/cgi-bin/carddisp.pl?gene=FURIN</a>     |

|        |                                                         |                |    |             |          |                                                                                                                                   |
|--------|---------------------------------------------------------|----------------|----|-------------|----------|-----------------------------------------------------------------------------------------------------------------------------------|
| NFKB2  | Nuclear Factor Kappa B Subunit 2                        | Protein Coding | 52 | GC10P102394 | 13.10839 | <a href="https://www.genecards.org/cgi-bin/carddisp.pl?gene=NFKB2">https://www.genecards.org/cgi-bin/carddisp.pl?gene=NFKB2</a>   |
| LIF    | LIF Interleukin 6 Family Cytokine                       | Protein Coding | 43 | GC22M030240 | 13.10428 | <a href="https://www.genecards.org/cgi-bin/carddisp.pl?gene=LIF">https://www.genecards.org/cgi-bin/carddisp.pl?gene=LIF</a>       |
| HDAC2  | Histone Deacetylase 2                                   | Protein Coding | 52 | GC06M113933 | 13.0973  | <a href="https://www.genecards.org/cgi-bin/carddisp.pl?gene=HDAC2">https://www.genecards.org/cgi-bin/carddisp.pl?gene=HDAC2</a>   |
| ADCY5  | Adenylate Cyclase 5                                     | Protein Coding | 49 | GC03M123282 | 13.09327 | <a href="https://www.genecards.org/cgi-bin/carddisp.pl?gene=ADCY5">https://www.genecards.org/cgi-bin/carddisp.pl?gene=ADCY5</a>   |
| IMPG1  | Interphotoreceptor Matrix Proteoglycan 1 Leucine Zipper | Protein Coding | 40 | GC06M075921 | 13.08588 | <a href="https://www.genecards.org/cgi-bin/carddisp.pl?gene=IMPG1">https://www.genecards.org/cgi-bin/carddisp.pl?gene=IMPG1</a>   |
| LZTR1  | Like Transcription Regulator 1                          | Protein Coding | 43 | GC22P020996 | 13.08452 | <a href="https://www.genecards.org/cgi-bin/carddisp.pl?gene=LZTR1">https://www.genecards.org/cgi-bin/carddisp.pl?gene=LZTR1</a>   |
| GPC4   | Glypican 4                                              | Protein Coding | 46 | GC0XM133300 | 13.07306 | <a href="https://www.genecards.org/cgi-bin/carddisp.pl?gene=GPC4">https://www.genecards.org/cgi-bin/carddisp.pl?gene=GPC4</a>     |
| SRD5A2 | Steroid 5 Alpha-Reductase 2 NADH:Ubiquin                | Protein Coding | 43 | GC02M031522 | 13.07273 | <a href="https://www.genecards.org/cgi-bin/carddisp.pl?gene=SRD5A2">https://www.genecards.org/cgi-bin/carddisp.pl?gene=SRD5A2</a> |
| NDUFA9 | one Oxidoreductase Subunit A9                           | Protein Coding | 44 | GC12P004649 | 13.06477 | <a href="https://www.genecards.org/cgi-bin/carddisp.pl?gene=NDUFA9">https://www.genecards.org/cgi-bin/carddisp.pl?gene=NDUFA9</a> |
| AGTR2  | Angiotensin II Receptor Type 2                          | Protein Coding | 44 | GC0XP116170 | 13.06456 | <a href="https://www.genecards.org/cgi-bin/carddisp.pl?gene=AGTR2">https://www.genecards.org/cgi-bin/carddisp.pl?gene=AGTR2</a>   |
| WNT4   | Wnt Family Member 4                                     | Protein Coding | 48 | GC01M022190 | 13.06435 | <a href="https://www.genecards.org/cgi-bin/carddisp.pl?gene=WNT4">https://www.genecards.org/cgi-bin/carddisp.pl?gene=WNT4</a>     |
| PAX4   | Paired Box 4                                            | Protein Coding | 44 | GC07M127610 | 13.06254 | <a href="https://www.genecards.org/cgi-bin/carddisp.pl?gene=PAX4">https://www.genecards.org/cgi-bin/carddisp.pl?gene=PAX4</a>     |
| ERLIN1 | ER Lipid Raft Associated 1 Heterogeneous                | Protein Coding | 43 | GC10M100150 | 13.05514 | <a href="https://www.genecards.org/cgi-bin/carddisp.pl?gene=ERLIN1">https://www.genecards.org/cgi-bin/carddisp.pl?gene=ERLIN1</a> |
| HNRNPK | Nuclear Ribonucleoprotein K                             | Protein Coding | 47 | GC09M086093 | 13.05486 | <a href="https://www.genecards.org/cgi-bin/carddisp.pl?gene=HNRNPK">https://www.genecards.org/cgi-bin/carddisp.pl?gene=HNRNPK</a> |
| VTN    | Vitronectin                                             | Protein Coding | 44 | GC17M031079 | 13.05256 | <a href="https://www.genecards.org/cgi-bin/carddisp.pl?gene=VTN">https://www.genecards.org/cgi-bin/carddisp.pl?gene=VTN</a>       |
| CIDEA  | Cell Death Inducing DFFA Like Effector C NADH:Ubiquin   | Protein Coding | 42 | GC03M009866 | 13.04613 | <a href="https://www.genecards.org/cgi-bin/carddisp.pl?gene=CIDEA">https://www.genecards.org/cgi-bin/carddisp.pl?gene=CIDEA</a>   |
| NDUFA2 | one Oxidoreductase Subunit A2 Colony                    | Protein Coding | 43 | GC05M140653 | 13.02415 | <a href="https://www.genecards.org/cgi-bin/carddisp.pl?gene=NDUFA2">https://www.genecards.org/cgi-bin/carddisp.pl?gene=NDUFA2</a> |
| CSF3R  | Stimulating Factor 3 Receptor Prolyl 4-                 | Protein Coding | 47 | GC01M036466 | 13.021   | <a href="https://www.genecards.org/cgi-bin/carddisp.pl?gene=CSF3R">https://www.genecards.org/cgi-bin/carddisp.pl?gene=CSF3R</a>   |
| P4HB   | Hydroxylase Subunit Beta                                | Protein Coding | 50 | GC17M081843 | 13.02099 | <a href="https://www.genecards.org/cgi-bin/carddisp.pl?gene=P4HB">https://www.genecards.org/cgi-bin/carddisp.pl?gene=P4HB</a>     |

|             |                                                    |                |    |             |          |                                                                                                                                             |
|-------------|----------------------------------------------------|----------------|----|-------------|----------|---------------------------------------------------------------------------------------------------------------------------------------------|
| PMPCA       | Peptidase, Mitochondrial Processing Subunit Alpha  | Protein Coding | 44 | GC09P136410 | 13.01141 | <a href="https://www.genecards.org/cgi-bin/carddisp.pl?gene=PMPCA">https://www.genecards.org/cgi-bin/carddisp.pl?gene=PMPCA</a>             |
| BDKRB2      | Bradykinin Receptor B2                             | Protein Coding | 45 | GC14P096205 | 13.01027 | <a href="https://www.genecards.org/cgi-bin/carddisp.pl?gene=BDKRB2">https://www.genecards.org/cgi-bin/carddisp.pl?gene=BDKRB2</a>           |
| ATRIP-TREX1 | ATRIP-TREX1 Readthrough                            | RNA Gene       | 5  | GC03P048450 | 13.00792 | <a href="https://www.genecards.org/cgi-bin/carddisp.pl?gene=ATRIP-TREX1">https://www.genecards.org/cgi-bin/carddisp.pl?gene=ATRIP-TREX1</a> |
| FANCM       | FA Complementati on Group M                        | Protein Coding | 43 | GC14P045135 | 13.00647 | <a href="https://www.genecards.org/cgi-bin/carddisp.pl?gene=FANCM">https://www.genecards.org/cgi-bin/carddisp.pl?gene=FANCM</a>             |
| NCSTN       | Nicastrin                                          | Protein Coding | 47 | GC01P160343 | 12.99393 | <a href="https://www.genecards.org/cgi-bin/carddisp.pl?gene=NCSTN">https://www.genecards.org/cgi-bin/carddisp.pl?gene=NCSTN</a>             |
| MAPK9       | Mitogen-Activated Protein Kinase 9                 | Protein Coding | 49 | GC05M180234 | 12.9919  | <a href="https://www.genecards.org/cgi-bin/carddisp.pl?gene=MAPK9">https://www.genecards.org/cgi-bin/carddisp.pl?gene=MAPK9</a>             |
| LDLRAP1     | Low Density Lipoprotein Receptor Adaptor Protein 1 | Protein Coding | 44 | GC01P025543 | 12.98189 | <a href="https://www.genecards.org/cgi-bin/carddisp.pl?gene=LDLRAP1">https://www.genecards.org/cgi-bin/carddisp.pl?gene=LDLRAP1</a>         |
| HNMT        | Histamine N-Methyltransferase                      | Protein Coding | 46 | GC02P137964 | 12.98167 | <a href="https://www.genecards.org/cgi-bin/carddisp.pl?gene=HNMT">https://www.genecards.org/cgi-bin/carddisp.pl?gene=HNMT</a>               |
| ACE2        | Angiotensin Converting Enzyme 2                    | Protein Coding | 49 | GC0XM015494 | 12.97091 | <a href="https://www.genecards.org/cgi-bin/carddisp.pl?gene=ACE2">https://www.genecards.org/cgi-bin/carddisp.pl?gene=ACE2</a>               |
| WNK1        | WNK Lysine Deficient Protein Kinase 1              | Protein Coding | 47 | GC12P000733 | 12.96705 | <a href="https://www.genecards.org/cgi-bin/carddisp.pl?gene=WNK1">https://www.genecards.org/cgi-bin/carddisp.pl?gene=WNK1</a>               |
| DLK1        | Delta Like Non-Canonical Notch Ligand 1            | Protein Coding | 45 | GC14P106102 | 12.9622  | <a href="https://www.genecards.org/cgi-bin/carddisp.pl?gene=DLK1">https://www.genecards.org/cgi-bin/carddisp.pl?gene=DLK1</a>               |
| GLI2        | GLI Family Zinc Finger 2                           | Protein Coding | 48 | GC02P120735 | 12.95878 | <a href="https://www.genecards.org/cgi-bin/carddisp.pl?gene=GLI2">https://www.genecards.org/cgi-bin/carddisp.pl?gene=GLI2</a>               |
| OXT         | Oxytocin/Neurophysin I Prepropeptide               | Protein Coding | 41 | GC20P003068 | 12.95798 | <a href="https://www.genecards.org/cgi-bin/carddisp.pl?gene=OXT">https://www.genecards.org/cgi-bin/carddisp.pl?gene=OXT</a>                 |
| GP1BB       | Glycoprotein Ib Platelet Subunit Beta              | Protein Coding | 43 | GC22P020083 | 12.94585 | <a href="https://www.genecards.org/cgi-bin/carddisp.pl?gene=GP1BB">https://www.genecards.org/cgi-bin/carddisp.pl?gene=GP1BB</a>             |
| AQP4        | Aquaporin 4                                        | Protein Coding | 47 | GC18M026852 | 12.94447 | <a href="https://www.genecards.org/cgi-bin/carddisp.pl?gene=AQP4">https://www.genecards.org/cgi-bin/carddisp.pl?gene=AQP4</a>               |
| ORAI1       | ORAI Calcium Release-Activated Calcium Modulator 1 | Protein Coding | 44 | GC12P123580 | 12.92715 | <a href="https://www.genecards.org/cgi-bin/carddisp.pl?gene=ORAI1">https://www.genecards.org/cgi-bin/carddisp.pl?gene=ORAI1</a>             |
| MIR99A      | MicroRNA 99a                                       | RNA Gene       | 21 | GC21P016539 | 12.92301 | <a href="https://www.genecards.org/cgi-bin/carddisp.pl?gene=MIR99A">https://www.genecards.org/cgi-bin/carddisp.pl?gene=MIR99A</a>           |
| GLS2        | Glutaminase 2                                      | Protein Coding | 43 | GC12M056470 | 12.91247 | <a href="https://www.genecards.org/cgi-bin/carddisp.pl?gene=GLS2">https://www.genecards.org/cgi-bin/carddisp.pl?gene=GLS2</a>               |

|        |                                                                           |                |    |             |          |                                                                                                                                   |
|--------|---------------------------------------------------------------------------|----------------|----|-------------|----------|-----------------------------------------------------------------------------------------------------------------------------------|
| DPM1   | Dolichyl-Phosphate Mannosyltransferase Subunit 1, Catalytic Interleukin 2 | Protein Coding | 45 | GC20M050934 | 12.90042 | <a href="https://www.genecards.org/cgi-bin/carddisp.pl?gene=DPM1">https://www.genecards.org/cgi-bin/carddisp.pl?gene=DPM1</a>     |
| IL2RG  | Receptor Subunit Gamma                                                    | Protein Coding | 48 | GC0XM071108 | 12.89767 | <a href="https://www.genecards.org/cgi-bin/carddisp.pl?gene=IL2RG">https://www.genecards.org/cgi-bin/carddisp.pl?gene=IL2RG</a>   |
| AGA    | Aspartylglucosaminidase                                                   | Protein Coding | 45 | GC04M177430 | 12.89751 | <a href="https://www.genecards.org/cgi-bin/carddisp.pl?gene=AGA">https://www.genecards.org/cgi-bin/carddisp.pl?gene=AGA</a>       |
| EBF3   | EBF Transcription Factor 3                                                | Protein Coding | 41 | GC10M129835 | 12.87708 | <a href="https://www.genecards.org/cgi-bin/carddisp.pl?gene=EBF3">https://www.genecards.org/cgi-bin/carddisp.pl?gene=EBF3</a>     |
| CTCF   | CCCTC-Binding Factor                                                      | Protein Coding | 47 | GC16P067563 | 12.87645 | <a href="https://www.genecards.org/cgi-bin/carddisp.pl?gene=CTCF">https://www.genecards.org/cgi-bin/carddisp.pl?gene=CTCF</a>     |
| AREG   | Amphiregulin                                                              | Protein Coding | 43 | GC04P074445 | 12.87519 | <a href="https://www.genecards.org/cgi-bin/carddisp.pl?gene=AREG">https://www.genecards.org/cgi-bin/carddisp.pl?gene=AREG</a>     |
| TRAF6  | TNF Receptor Associated Factor 6                                          | Protein Coding | 47 | GC11M036467 | 12.8637  | <a href="https://www.genecards.org/cgi-bin/carddisp.pl?gene=TRAF6">https://www.genecards.org/cgi-bin/carddisp.pl?gene=TRAF6</a>   |
| MIR197 | MicroRNA 197                                                              | RNA Gene       | 19 | GC01P109549 | 12.85798 | <a href="https://www.genecards.org/cgi-bin/carddisp.pl?gene=MIR197">https://www.genecards.org/cgi-bin/carddisp.pl?gene=MIR197</a> |
| TPM3   | Tropomyosin 3                                                             | Protein Coding | 47 | GC01M154127 | 12.85281 | <a href="https://www.genecards.org/cgi-bin/carddisp.pl?gene=TPM3">https://www.genecards.org/cgi-bin/carddisp.pl?gene=TPM3</a>     |
| DHRS4  | Dehydrogenase/Reductase 4                                                 | Protein Coding | 45 | GC14P023953 | 12.84587 | <a href="https://www.genecards.org/cgi-bin/carddisp.pl?gene=DHRS4">https://www.genecards.org/cgi-bin/carddisp.pl?gene=DHRS4</a>   |
| IL23A  | Interleukin 23 Subunit Alpha                                              | Protein Coding | 40 | GC12P056440 | 12.84121 | <a href="https://www.genecards.org/cgi-bin/carddisp.pl?gene=IL23A">https://www.genecards.org/cgi-bin/carddisp.pl?gene=IL23A</a>   |
| KLF11  | Kruppel Like Factor 11                                                    | Protein Coding | 40 | GC02P010044 | 12.8358  | <a href="https://www.genecards.org/cgi-bin/carddisp.pl?gene=KLF11">https://www.genecards.org/cgi-bin/carddisp.pl?gene=KLF11</a>   |
| TPM1   | Tropomyosin 1                                                             | Protein Coding | 50 | GC15P078910 | 12.83545 | <a href="https://www.genecards.org/cgi-bin/carddisp.pl?gene=TPM1">https://www.genecards.org/cgi-bin/carddisp.pl?gene=TPM1</a>     |
| USP9X  | Ubiquitin Specific Peptidase 9 X-Linked                                   | Protein Coding | 48 | GC0XP041085 | 12.83245 | <a href="https://www.genecards.org/cgi-bin/carddisp.pl?gene=USP9X">https://www.genecards.org/cgi-bin/carddisp.pl?gene=USP9X</a>   |
| RARS2  | Arginyl-TRNA Synthetase 2, Mitochondrial                                  | Protein Coding | 43 | GC06M087514 | 12.82485 | <a href="https://www.genecards.org/cgi-bin/carddisp.pl?gene=RARS2">https://www.genecards.org/cgi-bin/carddisp.pl?gene=RARS2</a>   |
| SHPK   | Sedoheptulokinase                                                         | Protein Coding | 38 | GC17M003608 | 12.8208  | <a href="https://www.genecards.org/cgi-bin/carddisp.pl?gene=SHPK">https://www.genecards.org/cgi-bin/carddisp.pl?gene=SHPK</a>     |
| PLCE1  | Phospholipase C Epsilon 1                                                 | Protein Coding | 44 | GC10P093993 | 12.81417 | <a href="https://www.genecards.org/cgi-bin/carddisp.pl?gene=PLCE1">https://www.genecards.org/cgi-bin/carddisp.pl?gene=PLCE1</a>   |
| APAF1  | Apoptotic Peptidase Activating Factor 1                                   | Protein Coding | 47 | GC12P098645 | 12.81352 | <a href="https://www.genecards.org/cgi-bin/carddisp.pl?gene=APAF1">https://www.genecards.org/cgi-bin/carddisp.pl?gene=APAF1</a>   |
| EIF4E  | Eukaryotic Translation Initiation Factor 4E                               | Protein Coding | 50 | GC04M098879 | 12.81149 | <a href="https://www.genecards.org/cgi-bin/carddisp.pl?gene=EIF4E">https://www.genecards.org/cgi-bin/carddisp.pl?gene=EIF4E</a>   |
| CUBN   | Cubilin                                                                   | Protein Coding | 47 | GC10M016824 | 12.80985 | <a href="https://www.genecards.org/cgi-bin/carddisp.pl?gene=CUBN">https://www.genecards.org/cgi-bin/carddisp.pl?gene=CUBN</a>     |
| CYP4F3 | Cytochrome P450 Family 4 Subfamily F Member 3                             | Protein Coding | 44 | GC19P015640 | 12.80623 | <a href="https://www.genecards.org/cgi-bin/carddisp.pl?gene=CYP4F3">https://www.genecards.org/cgi-bin/carddisp.pl?gene=CYP4F3</a> |

|         |                                                                 |                |    |             |          |                                                                                                                                     |
|---------|-----------------------------------------------------------------|----------------|----|-------------|----------|-------------------------------------------------------------------------------------------------------------------------------------|
| LPIN1   | Lipin 1                                                         | Protein Coding | 48 | GC02P011677 | 12.79837 | <a href="https://www.genecards.org/cgi-bin/carddisp.pl?gene=LPIN1">https://www.genecards.org/cgi-bin/carddisp.pl?gene=LPIN1</a>     |
| MPI     | Mannose Phosphate Isomerase                                     | Protein Coding | 45 | GC15P074890 | 12.79825 | <a href="https://www.genecards.org/cgi-bin/carddisp.pl?gene=MPI">https://www.genecards.org/cgi-bin/carddisp.pl?gene=MPI</a>         |
| PLCG2   | Phospholipase C Gamma 2                                         | Protein Coding | 52 | GC16P081773 | 12.79702 | <a href="https://www.genecards.org/cgi-bin/carddisp.pl?gene=PLCG2">https://www.genecards.org/cgi-bin/carddisp.pl?gene=PLCG2</a>     |
| KCNJ2   | Potassium Inwardly Rectifying Channel Subfamily J Member 2 ANKH | Protein Coding | 49 | GC17P070168 | 12.79509 | <a href="https://www.genecards.org/cgi-bin/carddisp.pl?gene=KCNJ2">https://www.genecards.org/cgi-bin/carddisp.pl?gene=KCNJ2</a>     |
| ANKH    | Inorganic Pyrophosphate Transport Regulator                     | Protein Coding | 41 | GC05M014706 | 12.79484 | <a href="https://www.genecards.org/cgi-bin/carddisp.pl?gene=ANKH">https://www.genecards.org/cgi-bin/carddisp.pl?gene=ANKH</a>       |
| POLR3A  | RNA Polymerase III Subunit A                                    | Protein Coding | 44 | GC10M077969 | 12.78629 | <a href="https://www.genecards.org/cgi-bin/carddisp.pl?gene=POLR3A">https://www.genecards.org/cgi-bin/carddisp.pl?gene=POLR3A</a>   |
| FAT4    | FAT Atypical Cadherin 4                                         | Protein Coding | 40 | GC04P125315 | 12.7849  | <a href="https://www.genecards.org/cgi-bin/carddisp.pl?gene=FAT4">https://www.genecards.org/cgi-bin/carddisp.pl?gene=FAT4</a>       |
| KLLN    | Killin, P53 Regulated DNA Replication Inhibitor                 | Protein Coding | 30 | GC10M087860 | 12.77884 | <a href="https://www.genecards.org/cgi-bin/carddisp.pl?gene=KLLN">https://www.genecards.org/cgi-bin/carddisp.pl?gene=KLLN</a>       |
| CAPN1   | Calpain 1                                                       | Protein Coding | 50 | GC11P065300 | 12.77332 | <a href="https://www.genecards.org/cgi-bin/carddisp.pl?gene=CAPN1">https://www.genecards.org/cgi-bin/carddisp.pl?gene=CAPN1</a>     |
| PIP5K1C | Phosphatidylinositol-4-Phosphate 5-Kinase Type 1 Gamma          | Protein Coding | 49 | GC19M003631 | 12.77129 | <a href="https://www.genecards.org/cgi-bin/carddisp.pl?gene=PIP5K1C">https://www.genecards.org/cgi-bin/carddisp.pl?gene=PIP5K1C</a> |
| UBC     | Ubiquitin C                                                     | Protein Coding | 44 | GC12M124911 | 12.76761 | <a href="https://www.genecards.org/cgi-bin/carddisp.pl?gene=UBC">https://www.genecards.org/cgi-bin/carddisp.pl?gene=UBC</a>         |
| KRIT1   | KRIT1 Ankyrin Repeat Containing                                 | Protein Coding | 43 | GC07M092198 | 12.76535 | <a href="https://www.genecards.org/cgi-bin/carddisp.pl?gene=KRIT1">https://www.genecards.org/cgi-bin/carddisp.pl?gene=KRIT1</a>     |
| CFLAR   | CASP8 And FADD Like Apoptosis Regulator                         | Protein Coding | 47 | GC02P201117 | 12.76239 | <a href="https://www.genecards.org/cgi-bin/carddisp.pl?gene=CFLAR">https://www.genecards.org/cgi-bin/carddisp.pl?gene=CFLAR</a>     |
| IDE     | Insulin Degrading Enzyme                                        | Protein Coding | 49 | GC10M092451 | 12.75746 | <a href="https://www.genecards.org/cgi-bin/carddisp.pl?gene=IDE">https://www.genecards.org/cgi-bin/carddisp.pl?gene=IDE</a>         |
| CRYAB   | Crystallin Alpha B                                              | Protein Coding | 45 | GC11M111908 | 12.75703 | <a href="https://www.genecards.org/cgi-bin/carddisp.pl?gene=CRYAB">https://www.genecards.org/cgi-bin/carddisp.pl?gene=CRYAB</a>     |
| NIPBL   | NIPBL Cohesin Loading Factor                                    | Protein Coding | 41 | GC05P036876 | 12.75626 | <a href="https://www.genecards.org/cgi-bin/carddisp.pl?gene=NIPBL">https://www.genecards.org/cgi-bin/carddisp.pl?gene=NIPBL</a>     |
| CTNNA1  | Catenin Alpha 1                                                 | Protein Coding | 48 | GC05P138613 | 12.75517 | <a href="https://www.genecards.org/cgi-bin/carddisp.pl?gene=CTNNA1">https://www.genecards.org/cgi-bin/carddisp.pl?gene=CTNNA1</a>   |
| CISH    | Cytokine Inducible SH2 Containing Protein                       | Protein Coding | 46 | GC03M050618 | 12.73907 | <a href="https://www.genecards.org/cgi-bin/carddisp.pl?gene=CISH">https://www.genecards.org/cgi-bin/carddisp.pl?gene=CISH</a>       |

|        |                                                      |                |    |             |          |                                                                                                                                   |
|--------|------------------------------------------------------|----------------|----|-------------|----------|-----------------------------------------------------------------------------------------------------------------------------------|
| DSG2   | Desmoglein 2                                         | Protein Coding | 47 | GC18P031498 | 12.73005 | <a href="https://www.genecards.org/cgi-bin/carddisp.pl?gene=DSG2">https://www.genecards.org/cgi-bin/carddisp.pl?gene=DSG2</a>     |
| BLVRB  | Biliverdin Reductase B Aldo-Keto                     | Protein Coding | 41 | GC19M040447 | 12.72987 | <a href="https://www.genecards.org/cgi-bin/carddisp.pl?gene=BLVRB">https://www.genecards.org/cgi-bin/carddisp.pl?gene=BLVRB</a>   |
| AKR1C3 | Reductase Family 1 Member C3                         | Protein Coding | 47 | GC10P005035 | 12.72881 | <a href="https://www.genecards.org/cgi-bin/carddisp.pl?gene=AKR1C3">https://www.genecards.org/cgi-bin/carddisp.pl?gene=AKR1C3</a> |
| SCD5   | Stearoyl-CoA Desaturase 5                            | Protein Coding | 42 | GC04M082629 | 12.72282 | <a href="https://www.genecards.org/cgi-bin/carddisp.pl?gene=SCD5">https://www.genecards.org/cgi-bin/carddisp.pl?gene=SCD5</a>     |
| ARPC1B | Actin Related Protein 2/3 Complex Subunit 1B         | Protein Coding | 44 | GC07P099374 | 12.70459 | <a href="https://www.genecards.org/cgi-bin/carddisp.pl?gene=ARPC1B">https://www.genecards.org/cgi-bin/carddisp.pl?gene=ARPC1B</a> |
| CLTC   | Clathrin Heavy Chain Nuclear                         | Protein Coding | 47 | GC17P059619 | 12.70436 | <a href="https://www.genecards.org/cgi-bin/carddisp.pl?gene=CLTC">https://www.genecards.org/cgi-bin/carddisp.pl?gene=CLTC</a>     |
| NR0B1  | Receptor Subfamily 0 Group B Member 1                | Protein Coding | 47 | GC0XM030304 | 12.69775 | <a href="https://www.genecards.org/cgi-bin/carddisp.pl?gene=NR0B1">https://www.genecards.org/cgi-bin/carddisp.pl?gene=NR0B1</a>   |
| GPBAR1 | G Protein-Coupled Bile Acid Receptor 1               | Protein Coding | 40 | GC02P218259 | 12.69684 | <a href="https://www.genecards.org/cgi-bin/carddisp.pl?gene=GPBAR1">https://www.genecards.org/cgi-bin/carddisp.pl?gene=GPBAR1</a> |
| RUNX3  | RUNX Family Transcription Factor 3                   | Protein Coding | 44 | GC01M024899 | 12.69664 | <a href="https://www.genecards.org/cgi-bin/carddisp.pl?gene=RUNX3">https://www.genecards.org/cgi-bin/carddisp.pl?gene=RUNX3</a>   |
| SPTBN2 | Spectrin Beta, Non-Erythrocytic 2                    | Protein Coding | 43 | GC11M069493 | 12.68712 | <a href="https://www.genecards.org/cgi-bin/carddisp.pl?gene=SPTBN2">https://www.genecards.org/cgi-bin/carddisp.pl?gene=SPTBN2</a> |
| COL6A2 | Collagen Type VI Alpha 2 Chain                       | Protein Coding | 44 | GC21P046098 | 12.67904 | <a href="https://www.genecards.org/cgi-bin/carddisp.pl?gene=COL6A2">https://www.genecards.org/cgi-bin/carddisp.pl?gene=COL6A2</a> |
| PTX3   | Pentraxin 3                                          | Protein Coding | 43 | GC03P157436 | 12.67726 | <a href="https://www.genecards.org/cgi-bin/carddisp.pl?gene=PTX3">https://www.genecards.org/cgi-bin/carddisp.pl?gene=PTX3</a>     |
| COQ8B  | Coenzyme Q8B                                         | Protein Coding | 33 | GC19M046773 | 12.67634 | <a href="https://www.genecards.org/cgi-bin/carddisp.pl?gene=COQ8B">https://www.genecards.org/cgi-bin/carddisp.pl?gene=COQ8B</a>   |
| PER2   | Period Circadian Regulator 2 Nuclear                 | Protein Coding | 44 | GC02M238244 | 12.6759  | <a href="https://www.genecards.org/cgi-bin/carddisp.pl?gene=PER2">https://www.genecards.org/cgi-bin/carddisp.pl?gene=PER2</a>     |
| NR5A1  | Receptor Subfamily 5 Group A Member 1                | Protein Coding | 51 | GC09M124481 | 12.67102 | <a href="https://www.genecards.org/cgi-bin/carddisp.pl?gene=NR5A1">https://www.genecards.org/cgi-bin/carddisp.pl?gene=NR5A1</a>   |
| GSK3A  | Glycogen Synthase Kinase 3 Alpha Outer Mitochondrial | Protein Coding | 50 | GC19M046852 | 12.66287 | <a href="https://www.genecards.org/cgi-bin/carddisp.pl?gene=GSK3A">https://www.genecards.org/cgi-bin/carddisp.pl?gene=GSK3A</a>   |
| OPA3   | Membrane Lipid Metabolism Regulator OPA3             | Protein Coding | 40 | GC19M045527 | 12.66028 | <a href="https://www.genecards.org/cgi-bin/carddisp.pl?gene=OPA3">https://www.genecards.org/cgi-bin/carddisp.pl?gene=OPA3</a>     |
| SF3B1  | Splicing Factor 3b Subunit 1                         | Protein Coding | 45 | GC02M197393 | 12.65619 | <a href="https://www.genecards.org/cgi-bin/carddisp.pl?gene=SF3B1">https://www.genecards.org/cgi-bin/carddisp.pl?gene=SF3B1</a>   |



|          |                                                               |                |    |             |          |                                                                                                                                       |
|----------|---------------------------------------------------------------|----------------|----|-------------|----------|---------------------------------------------------------------------------------------------------------------------------------------|
| PRKCE    | Protein Kinase C Epsilon                                      | Protein Coding | 50 | GC02P045651 | 12.65428 | <a href="https://www.genecards.org/cgi-bin/carddisp.pl?gene=PRKCE">https://www.genecards.org/cgi-bin/carddisp.pl?gene=PRKCE</a>       |
| BID      | BH3 Interacting Domain Death Agonist                          | Protein Coding | 46 | GC22M017734 | 12.63587 | <a href="https://www.genecards.org/cgi-bin/carddisp.pl?gene=BID">https://www.genecards.org/cgi-bin/carddisp.pl?gene=BID</a>           |
| BCL6     | BCL6 Transcription Repressor                                  | Protein Coding | 45 | GC03M187721 | 12.63439 | <a href="https://www.genecards.org/cgi-bin/carddisp.pl?gene=BCL6">https://www.genecards.org/cgi-bin/carddisp.pl?gene=BCL6</a>         |
| PAX5     | Paired Box 5                                                  | Protein Coding | 47 | GC09M036828 | 12.62249 | <a href="https://www.genecards.org/cgi-bin/carddisp.pl?gene=PAX5">https://www.genecards.org/cgi-bin/carddisp.pl?gene=PAX5</a>         |
| CTH      | Cystathionine Gamma-Lyase                                     | Protein Coding | 50 | GC01P070411 | 12.61815 | <a href="https://www.genecards.org/cgi-bin/carddisp.pl?gene=CTH">https://www.genecards.org/cgi-bin/carddisp.pl?gene=CTH</a>           |
| WASHC5   | WASH Complex Subunit 5                                        | Protein Coding | 32 | GC08M129230 | 12.61027 | <a href="https://www.genecards.org/cgi-bin/carddisp.pl?gene=WASHC5">https://www.genecards.org/cgi-bin/carddisp.pl?gene=WASHC5</a>     |
| TICAM1   | Toll Like Receptor Adaptor Molecule 1                         | Protein Coding | 45 | GC19M004815 | 12.6025  | <a href="https://www.genecards.org/cgi-bin/carddisp.pl?gene=TICAM1">https://www.genecards.org/cgi-bin/carddisp.pl?gene=TICAM1</a>     |
| DSC2     | Desmocollin 2                                                 | Protein Coding | 46 | GC18M031058 | 12.59691 | <a href="https://www.genecards.org/cgi-bin/carddisp.pl?gene=DSC2">https://www.genecards.org/cgi-bin/carddisp.pl?gene=DSC2</a>         |
| EIF4EBP1 | Eukaryotic Translation Initiation Factor 4E Binding Protein 1 | Protein Coding | 47 | GC08P038032 | 12.58926 | <a href="https://www.genecards.org/cgi-bin/carddisp.pl?gene=EIF4EBP1">https://www.genecards.org/cgi-bin/carddisp.pl?gene=EIF4EBP1</a> |
| TUBA4A   | Tubulin Alpha 4a                                              | Protein Coding | 46 | GC02M219249 | 12.58491 | <a href="https://www.genecards.org/cgi-bin/carddisp.pl?gene=TUBA4A">https://www.genecards.org/cgi-bin/carddisp.pl?gene=TUBA4A</a>     |
| FOXC2    | Forkhead Box C2                                               | Protein Coding | 45 | GC16P086570 | 12.58415 | <a href="https://www.genecards.org/cgi-bin/carddisp.pl?gene=FOXC2">https://www.genecards.org/cgi-bin/carddisp.pl?gene=FOXC2</a>       |
| MIR338   | MicroRNA 338                                                  | RNA Gene       | 17 | GC17M081126 | 12.58185 | <a href="https://www.genecards.org/cgi-bin/carddisp.pl?gene=MIR338">https://www.genecards.org/cgi-bin/carddisp.pl?gene=MIR338</a>     |
| CXCR2    | C-X-C Motif Chemokine Receptor 2                              | Protein Coding | 48 | GC02P218125 | 12.57916 | <a href="https://www.genecards.org/cgi-bin/carddisp.pl?gene=CXCR2">https://www.genecards.org/cgi-bin/carddisp.pl?gene=CXCR2</a>       |
| SLC12A6  | Solute Carrier Family 12 Member 6                             | Protein Coding | 49 | GC15M034229 | 12.57227 | <a href="https://www.genecards.org/cgi-bin/carddisp.pl?gene=SLC12A6">https://www.genecards.org/cgi-bin/carddisp.pl?gene=SLC12A6</a>   |
| MIR154   | MicroRNA 154                                                  | RNA Gene       | 18 | GC14P106303 | 12.56909 | <a href="https://www.genecards.org/cgi-bin/carddisp.pl?gene=MIR154">https://www.genecards.org/cgi-bin/carddisp.pl?gene=MIR154</a>     |
| DHCR24   | 24-Dehydrocholesterol Reductase                               | Protein Coding | 46 | GC01M054849 | 12.56117 | <a href="https://www.genecards.org/cgi-bin/carddisp.pl?gene=DHCR24">https://www.genecards.org/cgi-bin/carddisp.pl?gene=DHCR24</a>     |
| CPQ      | Carboxypeptidase Q                                            | Protein Coding | 34 | GC08P096645 | 12.55549 | <a href="https://www.genecards.org/cgi-bin/carddisp.pl?gene=CPQ">https://www.genecards.org/cgi-bin/carddisp.pl?gene=CPQ</a>           |
| FLNB     | Filamin B                                                     | Protein Coding | 47 | GC03P058008 | 12.54686 | <a href="https://www.genecards.org/cgi-bin/carddisp.pl?gene=FLNB">https://www.genecards.org/cgi-bin/carddisp.pl?gene=FLNB</a>         |
| IAPP     | Islet Amyloid Polypeptide                                     | Protein Coding | 42 | GC12P021354 | 12.53185 | <a href="https://www.genecards.org/cgi-bin/carddisp.pl?gene=IAPP">https://www.genecards.org/cgi-bin/carddisp.pl?gene=IAPP</a>         |
| GPAM     | Glycerol-3-Phosphate Acyltransferase, Mitochondrial           | Protein Coding | 43 | GC10M112148 | 12.4958  | <a href="https://www.genecards.org/cgi-bin/carddisp.pl?gene=GPAM">https://www.genecards.org/cgi-bin/carddisp.pl?gene=GPAM</a>         |

|         |                                                   |                |    |             |          |                                                                                                                                     |
|---------|---------------------------------------------------|----------------|----|-------------|----------|-------------------------------------------------------------------------------------------------------------------------------------|
| CHRM2   | Cholinergic Receptor Muscarinic 2                 | Protein Coding | 49 | GC07P136868 | 12.48891 | <a href="https://www.genecards.org/cgi-bin/carddisp.pl?gene=CHRM2">https://www.genecards.org/cgi-bin/carddisp.pl?gene=CHRM2</a>     |
| MYO5A   | Myosin VA                                         | Protein Coding | 45 | GC15M067802 | 12.48175 | <a href="https://www.genecards.org/cgi-bin/carddisp.pl?gene=MYO5A">https://www.genecards.org/cgi-bin/carddisp.pl?gene=MYO5A</a>     |
| SLC1A3  | Solute Carrier Family 1 Member 3                  | Protein Coding | 51 | GC05P036620 | 12.47509 | <a href="https://www.genecards.org/cgi-bin/carddisp.pl?gene=SLC1A3">https://www.genecards.org/cgi-bin/carddisp.pl?gene=SLC1A3</a>   |
| SLC34A3 | Solute Carrier Family 34 Member 3                 | Protein Coding | 42 | GC09P137230 | 12.47387 | <a href="https://www.genecards.org/cgi-bin/carddisp.pl?gene=SLC34A3">https://www.genecards.org/cgi-bin/carddisp.pl?gene=SLC34A3</a> |
| IARS1   | Isoleucyl-TRNA Synthetase 1                       | Protein Coding | 36 | GC09M092211 | 12.47056 | <a href="https://www.genecards.org/cgi-bin/carddisp.pl?gene=IARS1">https://www.genecards.org/cgi-bin/carddisp.pl?gene=IARS1</a>     |
| UBB     | Ubiquitin B                                       | Protein Coding | 44 | GC17P016380 | 12.46593 | <a href="https://www.genecards.org/cgi-bin/carddisp.pl?gene=UBB">https://www.genecards.org/cgi-bin/carddisp.pl?gene=UBB</a>         |
| DCN     | Decorin                                           | Protein Coding | 47 | GC12M091140 | 12.45364 | <a href="https://www.genecards.org/cgi-bin/carddisp.pl?gene=DCN">https://www.genecards.org/cgi-bin/carddisp.pl?gene=DCN</a>         |
| MICA    | MHC Class I Polypeptide-Related Sequence A        | Protein Coding | 39 | GC06P031399 | 12.45189 | <a href="https://www.genecards.org/cgi-bin/carddisp.pl?gene=MICA">https://www.genecards.org/cgi-bin/carddisp.pl?gene=MICA</a>       |
| CD69    | CD69 Molecule                                     | Protein Coding | 41 | GC12M015678 | 12.44717 | <a href="https://www.genecards.org/cgi-bin/carddisp.pl?gene=CD69">https://www.genecards.org/cgi-bin/carddisp.pl?gene=CD69</a>       |
| CTSG    | Cathepsin G                                       | Protein Coding | 45 | GC14M024573 | 12.42989 | <a href="https://www.genecards.org/cgi-bin/carddisp.pl?gene=CTSG">https://www.genecards.org/cgi-bin/carddisp.pl?gene=CTSG</a>       |
| ASCL1   | Achaete-Scute Family BHLH Transcription Factor 1  | Protein Coding | 45 | GC12P102957 | 12.41847 | <a href="https://www.genecards.org/cgi-bin/carddisp.pl?gene=ASCL1">https://www.genecards.org/cgi-bin/carddisp.pl?gene=ASCL1</a>     |
| COG6    | Component Of Oligomeric Golgi Complex 6           | Protein Coding | 38 | GC13P039655 | 12.40854 | <a href="https://www.genecards.org/cgi-bin/carddisp.pl?gene=COG6">https://www.genecards.org/cgi-bin/carddisp.pl?gene=COG6</a>       |
| USP8    | Ubiquitin Specific Peptidase 8                    | Protein Coding | 49 | GC15P050424 | 12.40557 | <a href="https://www.genecards.org/cgi-bin/carddisp.pl?gene=USP8">https://www.genecards.org/cgi-bin/carddisp.pl?gene=USP8</a>       |
| FMO3    | Flavin Containing Dimethylaniline Monooxygenase 3 | Protein Coding | 47 | GC01P171090 | 12.4014  | <a href="https://www.genecards.org/cgi-bin/carddisp.pl?gene=FMO3">https://www.genecards.org/cgi-bin/carddisp.pl?gene=FMO3</a>       |
| BUB1    | BUB1 Mitotic Checkpoint Serine/Threonine Kinase   | Protein Coding | 50 | GC02M110637 | 12.39558 | <a href="https://www.genecards.org/cgi-bin/carddisp.pl?gene=BUB1">https://www.genecards.org/cgi-bin/carddisp.pl?gene=BUB1</a>       |
| MGP     | Matrix Gla Protein                                | Protein Coding | 43 | GC12M015756 | 12.39504 | <a href="https://www.genecards.org/cgi-bin/carddisp.pl?gene=MGP">https://www.genecards.org/cgi-bin/carddisp.pl?gene=MGP</a>         |
| WNT3    | Wnt Family Member 3                               | Protein Coding | 47 | GC17M046762 | 12.39017 | <a href="https://www.genecards.org/cgi-bin/carddisp.pl?gene=WNT3">https://www.genecards.org/cgi-bin/carddisp.pl?gene=WNT3</a>       |
| KMT2C   | Lysine Methyltransferase 2C                       | Protein Coding | 42 | GC07M152134 | 12.38634 | <a href="https://www.genecards.org/cgi-bin/carddisp.pl?gene=KMT2C">https://www.genecards.org/cgi-bin/carddisp.pl?gene=KMT2C</a>     |
| AMH     | Anti-Mullerian Hormone                            | Protein Coding | 44 | GC19P002251 | 12.3841  | <a href="https://www.genecards.org/cgi-bin/carddisp.pl?gene=AMH">https://www.genecards.org/cgi-bin/carddisp.pl?gene=AMH</a>         |
| TP73    | Tumor Protein P73                                 | Protein Coding | 46 | GC01P003652 | 12.38259 | <a href="https://www.genecards.org/cgi-bin/carddisp.pl?gene=TP73">https://www.genecards.org/cgi-bin/carddisp.pl?gene=TP73</a>       |

|          |                                                                                                              |                |    |             |          |                                                                                                                                       |
|----------|--------------------------------------------------------------------------------------------------------------|----------------|----|-------------|----------|---------------------------------------------------------------------------------------------------------------------------------------|
| BIRC3    | Baculoviral IAP Repeat Containing 3 Chromosome 11 Open Reading Frame 65                                      | Protein Coding | 47 | GC11P102317 | 12.36399 | <a href="https://www.genecards.org/cgi-bin/carddisp.pl?gene=BIRC3">https://www.genecards.org/cgi-bin/carddisp.pl?gene=BIRC3</a>       |
| C11orf65 | ADP Ribosylation Factor Like GTPase 6 Recombination Signal Binding Protein For Immunoglobulin Kappa J Region | Protein Coding | 31 | GC11M108308 | 12.36275 | <a href="https://www.genecards.org/cgi-bin/carddisp.pl?gene=C11orf65">https://www.genecards.org/cgi-bin/carddisp.pl?gene=C11orf65</a> |
| ARL6     | CD2 Associated Protein                                                                                       | Protein Coding | 43 | GC03P097764 | 12.35234 | <a href="https://www.genecards.org/cgi-bin/carddisp.pl?gene=ARL6">https://www.genecards.org/cgi-bin/carddisp.pl?gene=ARL6</a>         |
| RBPJ     | Pvt1 Oncogene                                                                                                | Protein Coding | 48 | GC04P026165 | 12.34941 | <a href="https://www.genecards.org/cgi-bin/carddisp.pl?gene=RBPJ">https://www.genecards.org/cgi-bin/carddisp.pl?gene=RBPJ</a>         |
| CD2AP    | Gamma-Aminobutyric Acid Type A Receptor Subunit Alpha3                                                       | RNA Gene       | 44 | GC06P055437 | 12.34787 | <a href="https://www.genecards.org/cgi-bin/carddisp.pl?gene=CD2AP">https://www.genecards.org/cgi-bin/carddisp.pl?gene=CD2AP</a>       |
| PVT1     | Ceramide Synthase 1                                                                                          | Protein Coding | 24 | GC08P127822 | 12.34716 | <a href="https://www.genecards.org/cgi-bin/carddisp.pl?gene=PVT1">https://www.genecards.org/cgi-bin/carddisp.pl?gene=PVT1</a>         |
| GABRA3   | RAD51 Paralog D                                                                                              | Protein Coding | 45 | GC0XM152166 | 12.34649 | <a href="https://www.genecards.org/cgi-bin/carddisp.pl?gene=GABRA3">https://www.genecards.org/cgi-bin/carddisp.pl?gene=GABRA3</a>     |
| CERS1    | ATP Synthase F1 Subunit Epsilon                                                                              | Protein Coding | 41 | GC19M018868 | 12.338   | <a href="https://www.genecards.org/cgi-bin/carddisp.pl?gene=CERS1">https://www.genecards.org/cgi-bin/carddisp.pl?gene=CERS1</a>       |
| RAD51D   | ADAM Metallopeptidase With Thrombospondin Type 1 Motif 4                                                     | Protein Coding | 41 | GC17M035092 | 12.32848 | <a href="https://www.genecards.org/cgi-bin/carddisp.pl?gene=RAD51D">https://www.genecards.org/cgi-bin/carddisp.pl?gene=RAD51D</a>     |
| ATP5F1E  | Glyoxylate And Hydroxypyruvate Reductase                                                                     | Protein Coding | 32 | GC20M059026 | 12.31955 | <a href="https://www.genecards.org/cgi-bin/carddisp.pl?gene=ATP5F1E">https://www.genecards.org/cgi-bin/carddisp.pl?gene=ATP5F1E</a>   |
| ADAMTS4  | T-Box Transcription Factor 20                                                                                | Protein Coding | 43 | GC01M161184 | 12.31253 | <a href="https://www.genecards.org/cgi-bin/carddisp.pl?gene=ADAMTS4">https://www.genecards.org/cgi-bin/carddisp.pl?gene=ADAMTS4</a>   |
| GRHPR    | Gap Junction Protein Beta 3 Bactericidal Permeability Increasing Protein                                     | Protein Coding | 47 | GC09P037412 | 12.3089  | <a href="https://www.genecards.org/cgi-bin/carddisp.pl?gene=GRHPR">https://www.genecards.org/cgi-bin/carddisp.pl?gene=GRHPR</a>       |
| TBX20    |                                                                                                              | Protein Coding | 43 | GC07M035237 | 12.30676 | <a href="https://www.genecards.org/cgi-bin/carddisp.pl?gene=TBX20">https://www.genecards.org/cgi-bin/carddisp.pl?gene=TBX20</a>       |
| GJB3     |                                                                                                              | Protein Coding | 45 | GC01P034781 | 12.30407 | <a href="https://www.genecards.org/cgi-bin/carddisp.pl?gene=GJB3">https://www.genecards.org/cgi-bin/carddisp.pl?gene=GJB3</a>         |
| BPI      |                                                                                                              | Protein Coding | 42 | GC20P038304 | 12.30249 | <a href="https://www.genecards.org/cgi-bin/carddisp.pl?gene=BPI">https://www.genecards.org/cgi-bin/carddisp.pl?gene=BPI</a>           |

|        |                                                       |                |    |              |          |                                                                                                                                   |
|--------|-------------------------------------------------------|----------------|----|--------------|----------|-----------------------------------------------------------------------------------------------------------------------------------|
| MBTPS2 | Membrane Bound Transcription Factor Peptidase, Site 2 | Protein Coding | 44 | GC0XP021839  | 12.30023 | <a href="https://www.genecards.org/cgi-bin/carddisp.pl?gene=MBTPS2">https://www.genecards.org/cgi-bin/carddisp.pl?gene=MBTPS2</a> |
| MIR26B | MicroRNA 26b                                          | RNA Gene       | 21 | GC02P218402  | 12.29175 | <a href="https://www.genecards.org/cgi-bin/carddisp.pl?gene=MIR26B">https://www.genecards.org/cgi-bin/carddisp.pl?gene=MIR26B</a> |
| ICOS   | Inducible T Cell Costimulator                         | Protein Coding | 43 | GC02P203937  | 12.28773 | <a href="https://www.genecards.org/cgi-bin/carddisp.pl?gene=ICOS">https://www.genecards.org/cgi-bin/carddisp.pl?gene=ICOS</a>     |
| STUB1  | STIP1 Homology And U-Box Containing Protein 1         | Protein Coding | 46 | GC16P005516  | 12.28294 | <a href="https://www.genecards.org/cgi-bin/carddisp.pl?gene=STUB1">https://www.genecards.org/cgi-bin/carddisp.pl?gene=STUB1</a>   |
| MIR212 | MicroRNA 212                                          | RNA Gene       | 19 | GC17M002050  | 12.27748 | <a href="https://www.genecards.org/cgi-bin/carddisp.pl?gene=MIR212">https://www.genecards.org/cgi-bin/carddisp.pl?gene=MIR212</a> |
| TLR7   | Toll Like Receptor 7                                  | Protein Coding | 48 | GC0XP012867  | 12.27539 | <a href="https://www.genecards.org/cgi-bin/carddisp.pl?gene=TLR7">https://www.genecards.org/cgi-bin/carddisp.pl?gene=TLR7</a>     |
| CXCL9  | C-X-C Motif Chemokine Ligand 9                        | Protein Coding | 39 | GC04M076001  | 12.27432 | <a href="https://www.genecards.org/cgi-bin/carddisp.pl?gene=CXCL9">https://www.genecards.org/cgi-bin/carddisp.pl?gene=CXCL9</a>   |
| MX1    | MX Dynamin Like GTPase 1                              | Protein Coding | 43 | GC21P041420  | 12.27297 | <a href="https://www.genecards.org/cgi-bin/carddisp.pl?gene=MX1">https://www.genecards.org/cgi-bin/carddisp.pl?gene=MX1</a>       |
| HBEGF  | Heparin Binding EGF Like Growth Factor                | Protein Coding | 44 | GC05M140332  | 12.27253 | <a href="https://www.genecards.org/cgi-bin/carddisp.pl?gene=HBEGF">https://www.genecards.org/cgi-bin/carddisp.pl?gene=HBEGF</a>   |
| GAS5   | Growth Arrest Specific 5                              | RNA Gene       | 23 | GC01M173947  | 12.26382 | <a href="https://www.genecards.org/cgi-bin/carddisp.pl?gene=GAS5">https://www.genecards.org/cgi-bin/carddisp.pl?gene=GAS5</a>     |
| RPL5   | Ribosomal Protein L5                                  | Protein Coding | 48 | GC01P092832  | 12.26073 | <a href="https://www.genecards.org/cgi-bin/carddisp.pl?gene=RPL5">https://www.genecards.org/cgi-bin/carddisp.pl?gene=RPL5</a>     |
| PHGDH  | Phosphoglycerate Dehydrogenase                        | Protein Coding | 50 | GC01P119660  | 12.24876 | <a href="https://www.genecards.org/cgi-bin/carddisp.pl?gene=PHGDH">https://www.genecards.org/cgi-bin/carddisp.pl?gene=PHGDH</a>   |
| MOG    | Myelin Oligodendrocyte Glycoprotein                   | Protein Coding | 46 | GC06P055140  | 12.23808 | <a href="https://www.genecards.org/cgi-bin/carddisp.pl?gene=MOG">https://www.genecards.org/cgi-bin/carddisp.pl?gene=MOG</a>       |
| GRP    | Gastrin Releasing Peptide                             | Protein Coding | 41 | GC18P059220  | 12.23281 | <a href="https://www.genecards.org/cgi-bin/carddisp.pl?gene=GRP">https://www.genecards.org/cgi-bin/carddisp.pl?gene=GRP</a>       |
| COX20  | Cytochrome C Oxidase Assembly Factor COX20            | Protein Coding | 38 | GC01P244839  | 12.2285  | <a href="https://www.genecards.org/cgi-bin/carddisp.pl?gene=COX20">https://www.genecards.org/cgi-bin/carddisp.pl?gene=COX20</a>   |
| FOLH1  | Folate Hydrolase 1                                    | Protein Coding | 47 | GC11M069030  | 12.21309 | <a href="https://www.genecards.org/cgi-bin/carddisp.pl?gene=FOLH1">https://www.genecards.org/cgi-bin/carddisp.pl?gene=FOLH1</a>   |
| JMJD1C | Jumonji Domain Containing 1C                          | Protein Coding | 41 | GC10M063167  | 12.2083  | <a href="https://www.genecards.org/cgi-bin/carddisp.pl?gene=JMJD1C">https://www.genecards.org/cgi-bin/carddisp.pl?gene=JMJD1C</a> |
| MT-TW  | Mitochondrially Encoded TRNA-Trp (UGA/G)              | RNA Gene       | 13 | GCMTTP005514 | 12.19986 | <a href="https://www.genecards.org/cgi-bin/carddisp.pl?gene=MT-TW">https://www.genecards.org/cgi-bin/carddisp.pl?gene=MT-TW</a>   |

|          |                                                                                  |                |    |             |          |                                                                                                                                       |
|----------|----------------------------------------------------------------------------------|----------------|----|-------------|----------|---------------------------------------------------------------------------------------------------------------------------------------|
| JPH1     | Junctophilin 1                                                                   | Protein Coding | 39 | GC08M074234 | 12.194   | <a href="https://www.genecards.org/cgi-bin/carddisp.pl?gene=JPH1">https://www.genecards.org/cgi-bin/carddisp.pl?gene=JPH1</a>         |
| RETREG1  | Reticulophagy Regulator 1                                                        | Protein Coding | 31 | GC05M016472 | 12.19262 | <a href="https://www.genecards.org/cgi-bin/carddisp.pl?gene=RETREG1">https://www.genecards.org/cgi-bin/carddisp.pl?gene=RETREG1</a>   |
| LNCARSR  | LncRNA Regulator Of Akt Signaling Associated With HCC And RCC                    | RNA Gene       | 11 | GC09M079507 | 12.19117 | <a href="https://www.genecards.org/cgi-bin/carddisp.pl?gene=LNCARSR">https://www.genecards.org/cgi-bin/carddisp.pl?gene=LNCARSR</a>   |
| BARD1    | BRCA1 Associated RING Domain 1                                                   | Protein Coding | 47 | GC02M214725 | 12.19033 | <a href="https://www.genecards.org/cgi-bin/carddisp.pl?gene=BARD1">https://www.genecards.org/cgi-bin/carddisp.pl?gene=BARD1</a>       |
| APPL1    | Adaptor Protein, Phosphotyrosine Interacting With PH Domain And Leucine Zipper 1 | Protein Coding | 46 | GC03P057227 | 12.18964 | <a href="https://www.genecards.org/cgi-bin/carddisp.pl?gene=APPL1">https://www.genecards.org/cgi-bin/carddisp.pl?gene=APPL1</a>       |
| CYP2J2   | Cytochrome P450 Family 2 Subfamily J Member 2                                    | Protein Coding | 45 | GC01M059893 | 12.18659 | <a href="https://www.genecards.org/cgi-bin/carddisp.pl?gene=CYP2J2">https://www.genecards.org/cgi-bin/carddisp.pl?gene=CYP2J2</a>     |
| HUWE1    | HECT, UBA And WWE Domain Containing E3 Ubiquitin Protein Ligase 1                | Protein Coding | 44 | GC0XM053532 | 12.18521 | <a href="https://www.genecards.org/cgi-bin/carddisp.pl?gene=HUWE1">https://www.genecards.org/cgi-bin/carddisp.pl?gene=HUWE1</a>       |
| SLC25A19 | Solute Carrier Family 25 Member 19                                               | Protein Coding | 44 | GC17M075273 | 12.18481 | <a href="https://www.genecards.org/cgi-bin/carddisp.pl?gene=SLC25A19">https://www.genecards.org/cgi-bin/carddisp.pl?gene=SLC25A19</a> |
| TUBA1B   | Tubulin Alpha 1b                                                                 | Protein Coding | 43 | GC12M049127 | 12.18077 | <a href="https://www.genecards.org/cgi-bin/carddisp.pl?gene=TUBA1B">https://www.genecards.org/cgi-bin/carddisp.pl?gene=TUBA1B</a>     |
| PPM1D    | Protein Phosphatase, Mg2+/Mn2+ Dependent 1D                                      | Protein Coding | 48 | GC17P060600 | 12.17867 | <a href="https://www.genecards.org/cgi-bin/carddisp.pl?gene=PPM1D">https://www.genecards.org/cgi-bin/carddisp.pl?gene=PPM1D</a>       |
| GREM1    | Gremlin 1, DAN Family BMP Antagonist                                             | Protein Coding | 44 | GC15P033128 | 12.17686 | <a href="https://www.genecards.org/cgi-bin/carddisp.pl?gene=GREM1">https://www.genecards.org/cgi-bin/carddisp.pl?gene=GREM1</a>       |
| LIMK1    | LIM Domain Kinase 1                                                              | Protein Coding | 50 | GC07P074082 | 12.1734  | <a href="https://www.genecards.org/cgi-bin/carddisp.pl?gene=LIMK1">https://www.genecards.org/cgi-bin/carddisp.pl?gene=LIMK1</a>       |
| GABBR2   | Gamma-Aminobutyric Acid Type B Receptor Subunit 2                                | Protein Coding | 49 | GC09M098288 | 12.16758 | <a href="https://www.genecards.org/cgi-bin/carddisp.pl?gene=GABBR2">https://www.genecards.org/cgi-bin/carddisp.pl?gene=GABBR2</a>     |
| CNR2     | Cannabinoid Receptor 2                                                           | Protein Coding | 46 | GC01M023870 | 12.16039 | <a href="https://www.genecards.org/cgi-bin/carddisp.pl?gene=CNR2">https://www.genecards.org/cgi-bin/carddisp.pl?gene=CNR2</a>         |
| CAPN10   | Calpain 10                                                                       | Protein Coding | 42 | GC02P240586 | 12.15099 | <a href="https://www.genecards.org/cgi-bin/carddisp.pl?gene=CAPN10">https://www.genecards.org/cgi-bin/carddisp.pl?gene=CAPN10</a>     |

|         |                                                        |                |    |             |          |                                                                                                                                     |
|---------|--------------------------------------------------------|----------------|----|-------------|----------|-------------------------------------------------------------------------------------------------------------------------------------|
| CAMK2G  | Calcium/Calmodulin Dependent Protein Kinase II Gamma   | Protein Coding | 48 | GC10M073812 | 12.15047 | <a href="https://www.genecards.org/cgi-bin/carddisp.pl?gene=CAMK2G">https://www.genecards.org/cgi-bin/carddisp.pl?gene=CAMK2G</a>   |
| CALM1   | Calmodulin 1                                           | Protein Coding | 45 | GC14P090396 | 12.14745 | <a href="https://www.genecards.org/cgi-bin/carddisp.pl?gene=CALM1">https://www.genecards.org/cgi-bin/carddisp.pl?gene=CALM1</a>     |
| BLOC1S1 | Biogenesis Of Lysosomal Organelles Complex 1 Subunit 1 | Protein Coding | 36 | GC12P055765 | 12.14541 | <a href="https://www.genecards.org/cgi-bin/carddisp.pl?gene=BLOC1S1">https://www.genecards.org/cgi-bin/carddisp.pl?gene=BLOC1S1</a> |
| COX6A2  | Cytochrome C Oxidase Subunit 6A2                       | Protein Coding | 40 | GC16M031439 | 12.13695 | <a href="https://www.genecards.org/cgi-bin/carddisp.pl?gene=COX6A2">https://www.genecards.org/cgi-bin/carddisp.pl?gene=COX6A2</a>   |
| SUCLA2  | Succinate-CoA Ligase ADP-Forming Subunit Beta          | Protein Coding | 47 | GC13M047745 | 12.13319 | <a href="https://www.genecards.org/cgi-bin/carddisp.pl?gene=SUCLA2">https://www.genecards.org/cgi-bin/carddisp.pl?gene=SUCLA2</a>   |
| TRAF3   | TNF Receptor Associated Factor 3                       | Protein Coding | 48 | GC14P106036 | 12.12416 | <a href="https://www.genecards.org/cgi-bin/carddisp.pl?gene=TRAF3">https://www.genecards.org/cgi-bin/carddisp.pl?gene=TRAF3</a>     |
| AASS    | Amino adipate-Semialdehyde Synthase                    | Protein Coding | 45 | GC07M122073 | 12.11934 | <a href="https://www.genecards.org/cgi-bin/carddisp.pl?gene=AASS">https://www.genecards.org/cgi-bin/carddisp.pl?gene=AASS</a>       |
| F2R     | Coagulation Factor II Thrombin Receptor                | Protein Coding | 47 | GC05P076716 | 12.11281 | <a href="https://www.genecards.org/cgi-bin/carddisp.pl?gene=F2R">https://www.genecards.org/cgi-bin/carddisp.pl?gene=F2R</a>         |
| HDAC4   | Histone Deacetylase 4                                  | Protein Coding | 52 | GC02M239048 | 12.10809 | <a href="https://www.genecards.org/cgi-bin/carddisp.pl?gene=HDAC4">https://www.genecards.org/cgi-bin/carddisp.pl?gene=HDAC4</a>     |
| LECT2   | Leukocyte Cell Derived Chemotaxin 2                    | Protein Coding | 37 | GC05M135922 | 12.10747 | <a href="https://www.genecards.org/cgi-bin/carddisp.pl?gene=LECT2">https://www.genecards.org/cgi-bin/carddisp.pl?gene=LECT2</a>     |
| ATF2    | Activating Transcription Factor 2                      | Protein Coding | 47 | GC02M175072 | 12.10292 | <a href="https://www.genecards.org/cgi-bin/carddisp.pl?gene=ATF2">https://www.genecards.org/cgi-bin/carddisp.pl?gene=ATF2</a>       |
| BCL2L11 | BCL2 Like 11                                           | Protein Coding | 45 | GC02P111119 | 12.10106 | <a href="https://www.genecards.org/cgi-bin/carddisp.pl?gene=BCL2L11">https://www.genecards.org/cgi-bin/carddisp.pl?gene=BCL2L11</a> |
| ALDH7A1 | Aldehyde Dehydrogenase 7 Family Member A1              | Protein Coding | 48 | GC05M126541 | 12.09786 | <a href="https://www.genecards.org/cgi-bin/carddisp.pl?gene=ALDH7A1">https://www.genecards.org/cgi-bin/carddisp.pl?gene=ALDH7A1</a> |
| KANSL1  | KAT8 Regulatory NSL Complex Subunit 1                  | Protein Coding | 39 | GC17M046031 | 12.08863 | <a href="https://www.genecards.org/cgi-bin/carddisp.pl?gene=KANSL1">https://www.genecards.org/cgi-bin/carddisp.pl?gene=KANSL1</a>   |
| CTTN    | Cortactin                                              | Protein Coding | 44 | GC11P070398 | 12.08824 | <a href="https://www.genecards.org/cgi-bin/carddisp.pl?gene=CTTN">https://www.genecards.org/cgi-bin/carddisp.pl?gene=CTTN</a>       |
| SPTAN1  | Spectrin Alpha, Non-Erythrocytic 1                     | Protein Coding | 48 | GC09P128552 | 12.0822  | <a href="https://www.genecards.org/cgi-bin/carddisp.pl?gene=SPTAN1">https://www.genecards.org/cgi-bin/carddisp.pl?gene=SPTAN1</a>   |
| SCAP    | SREBF Chaperone                                        | Protein Coding | 41 | GC03M047413 | 12.07995 | <a href="https://www.genecards.org/cgi-bin/carddisp.pl?gene=SCAP">https://www.genecards.org/cgi-bin/carddisp.pl?gene=SCAP</a>       |
| BGN     | Biglycan                                               | Protein Coding | 43 | GC0XP153494 | 12.07963 | <a href="https://www.genecards.org/cgi-bin/carddisp.pl?gene=BGN">https://www.genecards.org/cgi-bin/carddisp.pl?gene=BGN</a>         |
| MIR193A | MicroRNA 193a                                          | RNA Gene       | 18 | GC17P031559 | 12.07841 | <a href="https://www.genecards.org/cgi-bin/carddisp.pl?gene=MIR193A">https://www.genecards.org/cgi-bin/carddisp.pl?gene=MIR193A</a> |

|         |                                                     |                |    |             |          |                                                                                                                                     |
|---------|-----------------------------------------------------|----------------|----|-------------|----------|-------------------------------------------------------------------------------------------------------------------------------------|
| SLC25A1 | Solute Carrier Family 25 Member 1                   | Protein Coding | 47 | GC22M019177 | 12.06457 | <a href="https://www.genecards.org/cgi-bin/carddisp.pl?gene=SLC25A1">https://www.genecards.org/cgi-bin/carddisp.pl?gene=SLC25A1</a> |
| DEPDC5  | DEP Domain Containing 5, GATOR1 Subcomplex Subunit  | Protein Coding | 40 | GC22P031753 | 12.06069 | <a href="https://www.genecards.org/cgi-bin/carddisp.pl?gene=DEPDC5">https://www.genecards.org/cgi-bin/carddisp.pl?gene=DEPDC5</a>   |
| IRF7    | Interferon Regulatory Factor 7                      | Protein Coding | 47 | GC11M000612 | 12.05842 | <a href="https://www.genecards.org/cgi-bin/carddisp.pl?gene=IRF7">https://www.genecards.org/cgi-bin/carddisp.pl?gene=IRF7</a>       |
| TMEM165 | Transmembrane Protein 165                           | Protein Coding | 39 | GC04P055395 | 12.05321 | <a href="https://www.genecards.org/cgi-bin/carddisp.pl?gene=TMEM165">https://www.genecards.org/cgi-bin/carddisp.pl?gene=TMEM165</a> |
| VCAN    | Versican                                            | Protein Coding | 47 | GC05P083471 | 12.05259 | <a href="https://www.genecards.org/cgi-bin/carddisp.pl?gene=VCAN">https://www.genecards.org/cgi-bin/carddisp.pl?gene=VCAN</a>       |
| VPS13A  | Vacuolar Protein Sorting 13 Homolog A               | Protein Coding | 41 | GC09P077177 | 12.04441 | <a href="https://www.genecards.org/cgi-bin/carddisp.pl?gene=VPS13A">https://www.genecards.org/cgi-bin/carddisp.pl?gene=VPS13A</a>   |
| GYPA    | Glycophorin A (MNS Blood Group)                     | Protein Coding | 45 | GC04M144109 | 12.04391 | <a href="https://www.genecards.org/cgi-bin/carddisp.pl?gene=GYPA">https://www.genecards.org/cgi-bin/carddisp.pl?gene=GYPA</a>       |
| HAX1    | HCLS1 Associated Protein X-1                        | Protein Coding | 43 | GC01P154273 | 12.02726 | <a href="https://www.genecards.org/cgi-bin/carddisp.pl?gene=HAX1">https://www.genecards.org/cgi-bin/carddisp.pl?gene=HAX1</a>       |
| IGF2BP2 | Insulin Like Growth Factor 2 mRNA Binding Protein 2 | Protein Coding | 44 | GC03M185643 | 12.01956 | <a href="https://www.genecards.org/cgi-bin/carddisp.pl?gene=IGF2BP2">https://www.genecards.org/cgi-bin/carddisp.pl?gene=IGF2BP2</a> |
| SGCB    | Sarcoglycan Beta                                    | Protein Coding | 41 | GC04M052019 | 12.01912 | <a href="https://www.genecards.org/cgi-bin/carddisp.pl?gene=SGCB">https://www.genecards.org/cgi-bin/carddisp.pl?gene=SGCB</a>       |
| COMP    | Cartilage Oligomeric Matrix Protein                 | Protein Coding | 48 | GC19M018783 | 12.01571 | <a href="https://www.genecards.org/cgi-bin/carddisp.pl?gene=COMP">https://www.genecards.org/cgi-bin/carddisp.pl?gene=COMP</a>       |
| MYOD1   | Myogenic Differentiation 1                          | Protein Coding | 47 | GC11P017741 | 12.01547 | <a href="https://www.genecards.org/cgi-bin/carddisp.pl?gene=MYOD1">https://www.genecards.org/cgi-bin/carddisp.pl?gene=MYOD1</a>     |
| PTK2B   | Protein Tyrosine Kinase 2 Beta                      | Protein Coding | 50 | GC08P027311 | 12.00551 | <a href="https://www.genecards.org/cgi-bin/carddisp.pl?gene=PTK2B">https://www.genecards.org/cgi-bin/carddisp.pl?gene=PTK2B</a>     |
| ALOXE3  | Arachidonate Lipoxygenase 3                         | Protein Coding | 43 | GC17M009179 | 12.00467 | <a href="https://www.genecards.org/cgi-bin/carddisp.pl?gene=ALOXE3">https://www.genecards.org/cgi-bin/carddisp.pl?gene=ALOXE3</a>   |
| SKI     | SKI Proto-Oncogene                                  | Protein Coding | 45 | GC01P002228 | 12.00082 | <a href="https://www.genecards.org/cgi-bin/carddisp.pl?gene=SKI">https://www.genecards.org/cgi-bin/carddisp.pl?gene=SKI</a>         |
| TMEM43  | Transmembrane Protein 43                            | Protein Coding | 41 | GC03P014124 | 11.99548 | <a href="https://www.genecards.org/cgi-bin/carddisp.pl?gene=TMEM43">https://www.genecards.org/cgi-bin/carddisp.pl?gene=TMEM43</a>   |
| SLC2A9  | Solute Carrier Family 2 Member 9                    | Protein Coding | 46 | GC04M009772 | 11.9935  | <a href="https://www.genecards.org/cgi-bin/carddisp.pl?gene=SLC2A9">https://www.genecards.org/cgi-bin/carddisp.pl?gene=SLC2A9</a>   |
| WRN     | WRN RecQ Like Helicase                              | Protein Coding | 45 | GC08P031033 | 11.99336 | <a href="https://www.genecards.org/cgi-bin/carddisp.pl?gene=WRN">https://www.genecards.org/cgi-bin/carddisp.pl?gene=WRN</a>         |

|         |                                                                                                                    |                |    |             |          |                                                                                                                                     |
|---------|--------------------------------------------------------------------------------------------------------------------|----------------|----|-------------|----------|-------------------------------------------------------------------------------------------------------------------------------------|
|         | Methylenetetrahydrofolate Dehydrogenase                                                                            |                |    |             |          |                                                                                                                                     |
| MTHFD1  | Cyclohydrolase And Formyltetrahydrofolate Synthetase 1                                                             | Protein Coding | 45 | GC14P064388 | 11.99127 | <a href="https://www.genecards.org/cgi-bin/carddisp.pl?gene=MTHFD1">https://www.genecards.org/cgi-bin/carddisp.pl?gene=MTHFD1</a>   |
| PCNT    | Pericentrin                                                                                                        | Protein Coding | 42 | GC21P046324 | 11.98215 | <a href="https://www.genecards.org/cgi-bin/carddisp.pl?gene=PCNT">https://www.genecards.org/cgi-bin/carddisp.pl?gene=PCNT</a>       |
| ACO1    | Aconitase 1                                                                                                        | Protein Coding | 45 | GC09P032374 | 11.98141 | <a href="https://www.genecards.org/cgi-bin/carddisp.pl?gene=ACO1">https://www.genecards.org/cgi-bin/carddisp.pl?gene=ACO1</a>       |
| GLDC    | Glycine Decarboxylase TRNA Methyltransferase 10C, Mitochondrial RNase P Subunit                                    | Protein Coding | 48 | GC09M006522 | 11.97592 | <a href="https://www.genecards.org/cgi-bin/carddisp.pl?gene=GLDC">https://www.genecards.org/cgi-bin/carddisp.pl?gene=GLDC</a>       |
| TRMT10C | Dedicator Of Cytokinesis 6 ATP Synthase Mitochondrial F1 Complex Assembly Factor 2                                 | Protein Coding | 36 | GC03P101561 | 11.97461 | <a href="https://www.genecards.org/cgi-bin/carddisp.pl?gene=TRMT10C">https://www.genecards.org/cgi-bin/carddisp.pl?gene=TRMT10C</a> |
| DOCK6   | Phospholipase A2 Group V NADH:Ubiquinone Oxidoreductase Subunit B10 Ectopic P-Granules Autophagy Protein 5 Homolog | Protein Coding | 40 | GC19M011199 | 11.97164 | <a href="https://www.genecards.org/cgi-bin/carddisp.pl?gene=DOCK6">https://www.genecards.org/cgi-bin/carddisp.pl?gene=DOCK6</a>     |
| ATPAF2  | 2',3'-Cyclic Nucleotide 3' Phosphodiesterase                                                                       | Protein Coding | 38 | GC17M017977 | 11.97006 | <a href="https://www.genecards.org/cgi-bin/carddisp.pl?gene=ATPAF2">https://www.genecards.org/cgi-bin/carddisp.pl?gene=ATPAF2</a>   |
| PLA2G5  | Opioid Receptor Delta 1                                                                                            | Protein Coding | 44 | GC01P020028 | 11.96537 | <a href="https://www.genecards.org/cgi-bin/carddisp.pl?gene=PLA2G5">https://www.genecards.org/cgi-bin/carddisp.pl?gene=PLA2G5</a>   |
| NDUFB10 | Coiled-Coil Domain Containing 47                                                                                   | Protein Coding | 44 | GC16P005573 | 11.96009 | <a href="https://www.genecards.org/cgi-bin/carddisp.pl?gene=NDUFB10">https://www.genecards.org/cgi-bin/carddisp.pl?gene=NDUFB10</a> |
| EPG5    | Hydroxyacid Oxidase 1                                                                                              | Protein Coding | 37 | GC18M045800 | 11.95972 | <a href="https://www.genecards.org/cgi-bin/carddisp.pl?gene=EPG5">https://www.genecards.org/cgi-bin/carddisp.pl?gene=EPG5</a>       |
| CNP     | Fibrinogen Like 1                                                                                                  | Protein Coding | 44 | GC17P041966 | 11.95895 | <a href="https://www.genecards.org/cgi-bin/carddisp.pl?gene=CNP">https://www.genecards.org/cgi-bin/carddisp.pl?gene=CNP</a>         |
| OPRD1   | Cyclin Dependent Kinase 8                                                                                          | Protein Coding | 45 | GC01P028812 | 11.95273 | <a href="https://www.genecards.org/cgi-bin/carddisp.pl?gene=OPRD1">https://www.genecards.org/cgi-bin/carddisp.pl?gene=OPRD1</a>     |
| CCDC47  | Dynamamin 1                                                                                                        | Protein Coding | 36 | GC17M063745 | 11.94775 | <a href="https://www.genecards.org/cgi-bin/carddisp.pl?gene=CCDC47">https://www.genecards.org/cgi-bin/carddisp.pl?gene=CCDC47</a>   |
| HAO1    |                                                                                                                    | Protein Coding | 44 | GC20M007863 | 11.93902 | <a href="https://www.genecards.org/cgi-bin/carddisp.pl?gene=HAO1">https://www.genecards.org/cgi-bin/carddisp.pl?gene=HAO1</a>       |
| FGL1    |                                                                                                                    | Protein Coding | 41 | GC08M017864 | 11.93853 | <a href="https://www.genecards.org/cgi-bin/carddisp.pl?gene=FGL1">https://www.genecards.org/cgi-bin/carddisp.pl?gene=FGL1</a>       |
| CDK8    |                                                                                                                    | Protein Coding | 48 | GC13P026254 | 11.93615 | <a href="https://www.genecards.org/cgi-bin/carddisp.pl?gene=CDK8">https://www.genecards.org/cgi-bin/carddisp.pl?gene=CDK8</a>       |
| DNM1    |                                                                                                                    | Protein Coding | 51 | GC09P128191 | 11.92584 | <a href="https://www.genecards.org/cgi-bin/carddisp.pl?gene=DNM1">https://www.genecards.org/cgi-bin/carddisp.pl?gene=DNM1</a>       |



|          |                                                      |                |    |             |          |                                                                                                                                       |
|----------|------------------------------------------------------|----------------|----|-------------|----------|---------------------------------------------------------------------------------------------------------------------------------------|
| BIN1     | Bridging Integrator 1                                | Protein Coding | 47 | GC02M127048 | 11.92172 | <a href="https://www.genecards.org/cgi-bin/carddisp.pl?gene=BIN1">https://www.genecards.org/cgi-bin/carddisp.pl?gene=BIN1</a>         |
| LIPF     | Lipase F, Gastric Type Fibroblast                    | Protein Coding | 42 | GC10P088664 | 11.91782 | <a href="https://www.genecards.org/cgi-bin/carddisp.pl?gene=LIPF">https://www.genecards.org/cgi-bin/carddisp.pl?gene=LIPF</a>         |
| FGF7     | Growth Factor 7                                      | Protein Coding | 43 | GC15P049423 | 11.91234 | <a href="https://www.genecards.org/cgi-bin/carddisp.pl?gene=FGF7">https://www.genecards.org/cgi-bin/carddisp.pl?gene=FGF7</a>         |
| LIN28B   | Lin-28 Homolog B Phosphate                           | Protein Coding | 43 | GC06P104943 | 11.91173 | <a href="https://www.genecards.org/cgi-bin/carddisp.pl?gene=LIN28B">https://www.genecards.org/cgi-bin/carddisp.pl?gene=LIN28B</a>     |
| PCYT1A   | Cytidylyltransferase 1A, Choline                     | Protein Coding | 47 | GC03M196214 | 11.88505 | <a href="https://www.genecards.org/cgi-bin/carddisp.pl?gene=PCYT1A">https://www.genecards.org/cgi-bin/carddisp.pl?gene=PCYT1A</a>     |
| MC2R     | Melanocortin 2 Receptor Heterogeneous                | Protein Coding | 48 | GC18M019097 | 11.87764 | <a href="https://www.genecards.org/cgi-bin/carddisp.pl?gene=MC2R">https://www.genecards.org/cgi-bin/carddisp.pl?gene=MC2R</a>         |
| HNRNPU   | Nuclear Ribonucleoprotein U                          | Protein Coding | 43 | GC01M244844 | 11.86412 | <a href="https://www.genecards.org/cgi-bin/carddisp.pl?gene=HNRNPU">https://www.genecards.org/cgi-bin/carddisp.pl?gene=HNRNPU</a>     |
| TYRP1    | Tyrosinase Related Protein 1                         | Protein Coding | 47 | GC09P012683 | 11.86264 | <a href="https://www.genecards.org/cgi-bin/carddisp.pl?gene=TYRP1">https://www.genecards.org/cgi-bin/carddisp.pl?gene=TYRP1</a>       |
| NUS1     | NUS1 Dehydrodolichyl Diphosphate Synthase Subunit    | Protein Coding | 40 | GC06P117675 | 11.85999 | <a href="https://www.genecards.org/cgi-bin/carddisp.pl?gene=NUS1">https://www.genecards.org/cgi-bin/carddisp.pl?gene=NUS1</a>         |
| KAT6B    | Lysine Acetyltransferase 6B                          | Protein Coding | 43 | GC10P074840 | 11.85551 | <a href="https://www.genecards.org/cgi-bin/carddisp.pl?gene=KAT6B">https://www.genecards.org/cgi-bin/carddisp.pl?gene=KAT6B</a>       |
| CD38     | CD38 Molecule                                        | Protein Coding | 45 | GC04P015779 | 11.85372 | <a href="https://www.genecards.org/cgi-bin/carddisp.pl?gene=CD38">https://www.genecards.org/cgi-bin/carddisp.pl?gene=CD38</a>         |
| EEF1A2   | Eukaryotic Translation Elongation Factor 1 Alpha 2   | Protein Coding | 47 | GC20M063488 | 11.85248 | <a href="https://www.genecards.org/cgi-bin/carddisp.pl?gene=EEF1A2">https://www.genecards.org/cgi-bin/carddisp.pl?gene=EEF1A2</a>     |
| BBIP1    | BBSome Interacting Protein 1                         | Protein Coding | 32 | GC10M110898 | 11.85005 | <a href="https://www.genecards.org/cgi-bin/carddisp.pl?gene=BBIP1">https://www.genecards.org/cgi-bin/carddisp.pl?gene=BBIP1</a>       |
| TAFAZZIN | Tafazzin, Phospholipid-Lysophospholipid Transacylase | Protein Coding | 34 | GC0XP154413 | 11.84665 | <a href="https://www.genecards.org/cgi-bin/carddisp.pl?gene=TAFAZZIN">https://www.genecards.org/cgi-bin/carddisp.pl?gene=TAFAZZIN</a> |
| VPS11    | VPS11 Core Subunit Of CORVET And HOPS Complexes      | Protein Coding | 42 | GC11P119067 | 11.83394 | <a href="https://www.genecards.org/cgi-bin/carddisp.pl?gene=VPS11">https://www.genecards.org/cgi-bin/carddisp.pl?gene=VPS11</a>       |
| PLEK     | Pleckstrin                                           | Protein Coding | 40 | GC02P068365 | 11.82782 | <a href="https://www.genecards.org/cgi-bin/carddisp.pl?gene=PLEK">https://www.genecards.org/cgi-bin/carddisp.pl?gene=PLEK</a>         |
| SLC6A8   | Solute Carrier Family 6 Member 8                     | Protein Coding | 46 | GC0XP153688 | 11.82304 | <a href="https://www.genecards.org/cgi-bin/carddisp.pl?gene=SLC6A8">https://www.genecards.org/cgi-bin/carddisp.pl?gene=SLC6A8</a>     |
| MIR128-2 | MicroRNA 128-2                                       | RNA Gene       | 20 | GC03P035750 | 11.82282 | <a href="https://www.genecards.org/cgi-bin/carddisp.pl?gene=MIR128-2">https://www.genecards.org/cgi-bin/carddisp.pl?gene=MIR128-2</a> |

|        |                                                        |                |    |             |          |                                                                                                                                   |
|--------|--------------------------------------------------------|----------------|----|-------------|----------|-----------------------------------------------------------------------------------------------------------------------------------|
| PTPA   | Protein Phosphatase 2 Phosphatase Activator            | Protein Coding | 36 | GC09P129111 | 11.82228 | <a href="https://www.genecards.org/cgi-bin/carddisp.pl?gene=PTPA">https://www.genecards.org/cgi-bin/carddisp.pl?gene=PTPA</a>     |
| TAP2   | Transporter 2, ATP Binding Cassette Subfamily B Member | Protein Coding | 45 | GC06M032821 | 11.81733 | <a href="https://www.genecards.org/cgi-bin/carddisp.pl?gene=TAP2">https://www.genecards.org/cgi-bin/carddisp.pl?gene=TAP2</a>     |
| RIF1   | Replication Timing Regulatory Factor 1                 | Protein Coding | 40 | GC02P151409 | 11.81404 | <a href="https://www.genecards.org/cgi-bin/carddisp.pl?gene=RIF1">https://www.genecards.org/cgi-bin/carddisp.pl?gene=RIF1</a>     |
| NCOR1  | Nuclear Receptor Corepressor 1                         | Protein Coding | 44 | GC17M016029 | 11.80752 | <a href="https://www.genecards.org/cgi-bin/carddisp.pl?gene=NCOR1">https://www.genecards.org/cgi-bin/carddisp.pl?gene=NCOR1</a>   |
| TNXB   | Tenascin XB                                            | Protein Coding | 44 | GC06M046900 | 11.80141 | <a href="https://www.genecards.org/cgi-bin/carddisp.pl?gene=TNXB">https://www.genecards.org/cgi-bin/carddisp.pl?gene=TNXB</a>     |
| ARF1   | ADP Ribosylation Factor 1                              | Protein Coding | 48 | GC01P228082 | 11.80075 | <a href="https://www.genecards.org/cgi-bin/carddisp.pl?gene=ARF1">https://www.genecards.org/cgi-bin/carddisp.pl?gene=ARF1</a>     |
| THRA   | Thyroid Hormone Receptor Alpha                         | Protein Coding | 50 | GC17P040058 | 11.79574 | <a href="https://www.genecards.org/cgi-bin/carddisp.pl?gene=THRA">https://www.genecards.org/cgi-bin/carddisp.pl?gene=THRA</a>     |
| ATL1   | Atlantin GTPase 1                                      | Protein Coding | 42 | GC14P050532 | 11.79336 | <a href="https://www.genecards.org/cgi-bin/carddisp.pl?gene=ATL1">https://www.genecards.org/cgi-bin/carddisp.pl?gene=ATL1</a>     |
| TIA1   | TIA1 Cytotoxic Granule Associated RNA Binding Protein  | Protein Coding | 44 | GC02M070209 | 11.79236 | <a href="https://www.genecards.org/cgi-bin/carddisp.pl?gene=TIA1">https://www.genecards.org/cgi-bin/carddisp.pl?gene=TIA1</a>     |
| ZNF423 | Zinc Finger Protein 423                                | Protein Coding | 40 | GC16M049487 | 11.77463 | <a href="https://www.genecards.org/cgi-bin/carddisp.pl?gene=ZNF423">https://www.genecards.org/cgi-bin/carddisp.pl?gene=ZNF423</a> |
| IL16   | Interleukin 16                                         | Protein Coding | 43 | GC15P081159 | 11.77269 | <a href="https://www.genecards.org/cgi-bin/carddisp.pl?gene=IL16">https://www.genecards.org/cgi-bin/carddisp.pl?gene=IL16</a>     |
| FGF1   | Fibroblast Growth Factor 1                             | Protein Coding | 48 | GC05M142555 | 11.76774 | <a href="https://www.genecards.org/cgi-bin/carddisp.pl?gene=FGF1">https://www.genecards.org/cgi-bin/carddisp.pl?gene=FGF1</a>     |
| KRT20  | Keratin 20                                             | Protein Coding | 43 | GC17M040875 | 11.75627 | <a href="https://www.genecards.org/cgi-bin/carddisp.pl?gene=KRT20">https://www.genecards.org/cgi-bin/carddisp.pl?gene=KRT20</a>   |
| KRT16  | Keratin 16                                             | Protein Coding | 45 | GC17M041609 | 11.75171 | <a href="https://www.genecards.org/cgi-bin/carddisp.pl?gene=KRT16">https://www.genecards.org/cgi-bin/carddisp.pl?gene=KRT16</a>   |
| MAP2K2 | Mitogen-Activated Protein Kinase Kinase 2              | Protein Coding | 54 | GC19M004090 | 11.74303 | <a href="https://www.genecards.org/cgi-bin/carddisp.pl?gene=MAP2K2">https://www.genecards.org/cgi-bin/carddisp.pl?gene=MAP2K2</a> |
| BCAP31 | B Cell Receptor Associated Protein 31                  | Protein Coding | 41 | GC0XM153701 | 11.71626 | <a href="https://www.genecards.org/cgi-bin/carddisp.pl?gene=BCAP31">https://www.genecards.org/cgi-bin/carddisp.pl?gene=BCAP31</a> |
| PALLD  | Palladin, Cytoskeletal Associated Protein              | Protein Coding | 44 | GC04P168497 | 11.71264 | <a href="https://www.genecards.org/cgi-bin/carddisp.pl?gene=PALLD">https://www.genecards.org/cgi-bin/carddisp.pl?gene=PALLD</a>   |
| STS    | Steroid Sulfatase                                      | Protein Coding | 45 | GC0XP007146 | 11.70275 | <a href="https://www.genecards.org/cgi-bin/carddisp.pl?gene=STS">https://www.genecards.org/cgi-bin/carddisp.pl?gene=STS</a>       |

|           |                                                |                |    |             |          |                                                                                                                                         |
|-----------|------------------------------------------------|----------------|----|-------------|----------|-----------------------------------------------------------------------------------------------------------------------------------------|
| MYL2      | Myosin Light Chain 2                           | Protein Coding | 50 | GC12M110910 | 11.69952 | <a href="https://www.genecards.org/cgi-bin/carddisp.pl?gene=MYL2">https://www.genecards.org/cgi-bin/carddisp.pl?gene=MYL2</a>           |
| PRDX5     | Peroxioredoxin 5                               | Protein Coding | 47 | GC11P064317 | 11.69821 | <a href="https://www.genecards.org/cgi-bin/carddisp.pl?gene=PRDX5">https://www.genecards.org/cgi-bin/carddisp.pl?gene=PRDX5</a>         |
| MCCC1     | Methylcrotonyl-CoA Carboxylase Subunit 1       | Protein Coding | 44 | GC03M183015 | 11.69649 | <a href="https://www.genecards.org/cgi-bin/carddisp.pl?gene=MCCC1">https://www.genecards.org/cgi-bin/carddisp.pl?gene=MCCC1</a>         |
| GMPPA     | GDP-Mannose Pyrophosphorylase A                | Protein Coding | 43 | GC02P219498 | 11.69284 | <a href="https://www.genecards.org/cgi-bin/carddisp.pl?gene=GMPPA">https://www.genecards.org/cgi-bin/carddisp.pl?gene=GMPPA</a>         |
| TUBB3     | Tubulin Beta 3 Class III                       | Protein Coding | 50 | GC16P089919 | 11.68356 | <a href="https://www.genecards.org/cgi-bin/carddisp.pl?gene=TUBB3">https://www.genecards.org/cgi-bin/carddisp.pl?gene=TUBB3</a>         |
| PPP2R1A   | Protein Phosphatase 2 Scaffold Subunit Aalpha  | Protein Coding | 48 | GC19P052189 | 11.67043 | <a href="https://www.genecards.org/cgi-bin/carddisp.pl?gene=PPP2R1A">https://www.genecards.org/cgi-bin/carddisp.pl?gene=PPP2R1A</a>     |
| MIRLET7A3 | MicroRNA Let-7a-3                              | RNA Gene       | 19 | GC22P046112 | 11.65926 | <a href="https://www.genecards.org/cgi-bin/carddisp.pl?gene=MIRLET7A3">https://www.genecards.org/cgi-bin/carddisp.pl?gene=MIRLET7A3</a> |
| BAP1      | BRCA1 Associated Protein 1                     | Protein Coding | 47 | GC03M052401 | 11.65662 | <a href="https://www.genecards.org/cgi-bin/carddisp.pl?gene=BAP1">https://www.genecards.org/cgi-bin/carddisp.pl?gene=BAP1</a>           |
| CRPPA     | CDP-L-Ribitol Pyrophosphorylase A              | Protein Coding | 30 | GC07M016088 | 11.65179 | <a href="https://www.genecards.org/cgi-bin/carddisp.pl?gene=CRPPA">https://www.genecards.org/cgi-bin/carddisp.pl?gene=CRPPA</a>         |
| CYP4F11   | Cytochrome P450 Family 4 Subfamily F Member 11 | Protein Coding | 40 | GC19M015912 | 11.65042 | <a href="https://www.genecards.org/cgi-bin/carddisp.pl?gene=CYP4F11">https://www.genecards.org/cgi-bin/carddisp.pl?gene=CYP4F11</a>     |
| GSTM3     | Glutathione S-Transferase Mu 3                 | Protein Coding | 46 | GC01M109733 | 11.64908 | <a href="https://www.genecards.org/cgi-bin/carddisp.pl?gene=GSTM3">https://www.genecards.org/cgi-bin/carddisp.pl?gene=GSTM3</a>         |
| LORICRIN  | Loricrin Cornified Envelope Precursor Protein  | Protein Coding | 28 | GC01P153262 | 11.64103 | <a href="https://www.genecards.org/cgi-bin/carddisp.pl?gene=LORICRIN">https://www.genecards.org/cgi-bin/carddisp.pl?gene=LORICRIN</a>   |
| TNFSF4    | TNF Superfamily Member 4                       | Protein Coding | 41 | GC01M173183 | 11.63899 | <a href="https://www.genecards.org/cgi-bin/carddisp.pl?gene=TNFSF4">https://www.genecards.org/cgi-bin/carddisp.pl?gene=TNFSF4</a>       |
| DOCK7     | Dedicator Of Cytokinesis 7                     | Protein Coding | 42 | GC01M062454 | 11.63472 | <a href="https://www.genecards.org/cgi-bin/carddisp.pl?gene=DOCK7">https://www.genecards.org/cgi-bin/carddisp.pl?gene=DOCK7</a>         |
| PDE4D     | Phosphodiesterase 4D                           | Protein Coding | 49 | GC05M058969 | 11.62312 | <a href="https://www.genecards.org/cgi-bin/carddisp.pl?gene=PDE4D">https://www.genecards.org/cgi-bin/carddisp.pl?gene=PDE4D</a>         |
| ZFH3      | Zinc Finger Homeobox 3                         | Protein Coding | 42 | GC16M072782 | 11.61782 | <a href="https://www.genecards.org/cgi-bin/carddisp.pl?gene=ZFH3">https://www.genecards.org/cgi-bin/carddisp.pl?gene=ZFH3</a>           |
| ADRB1     | Adrenoceptor Beta 1                            | Protein Coding | 49 | GC10P114044 | 11.61673 | <a href="https://www.genecards.org/cgi-bin/carddisp.pl?gene=ADRB1">https://www.genecards.org/cgi-bin/carddisp.pl?gene=ADRB1</a>         |
| RAI1      | Retinoic Acid Induced 1                        | Protein Coding | 40 | GC17P017682 | 11.6143  | <a href="https://www.genecards.org/cgi-bin/carddisp.pl?gene=RAI1">https://www.genecards.org/cgi-bin/carddisp.pl?gene=RAI1</a>           |
| SOD3      | Superoxide Dismutase 3                         | Protein Coding | 41 | GC04P024798 | 11.61317 | <a href="https://www.genecards.org/cgi-bin/carddisp.pl?gene=SOD3">https://www.genecards.org/cgi-bin/carddisp.pl?gene=SOD3</a>           |
| FRZB      | Frizzled Related Protein                       | Protein Coding | 43 | GC02M182833 | 11.60966 | <a href="https://www.genecards.org/cgi-bin/carddisp.pl?gene=FRZB">https://www.genecards.org/cgi-bin/carddisp.pl?gene=FRZB</a>           |

|          |                                                       |                |    |             |          |                                                                                                                                       |
|----------|-------------------------------------------------------|----------------|----|-------------|----------|---------------------------------------------------------------------------------------------------------------------------------------|
| LEF1     | Lymphoid Enhancer Binding Factor 1                    | Protein Coding | 48 | GC04M108047 | 11.60907 | <a href="https://www.genecards.org/cgi-bin/carddisp.pl?gene=LEF1">https://www.genecards.org/cgi-bin/carddisp.pl?gene=LEF1</a>         |
| SUCLG1   | Succinate-CoA Ligase GDP/ADP-Forming Subunit Alpha    | Protein Coding | 46 | GC02M084423 | 11.60468 | <a href="https://www.genecards.org/cgi-bin/carddisp.pl?gene=SUCLG1">https://www.genecards.org/cgi-bin/carddisp.pl?gene=SUCLG1</a>     |
| CFP      | Complement Factor Properdin                           | Protein Coding | 44 | GC0XM047624 | 11.60401 | <a href="https://www.genecards.org/cgi-bin/carddisp.pl?gene=CFP">https://www.genecards.org/cgi-bin/carddisp.pl?gene=CFP</a>           |
| CD33     | CD33 Molecule                                         | Protein Coding | 44 | GC19P051212 | 11.5978  | <a href="https://www.genecards.org/cgi-bin/carddisp.pl?gene=CD33">https://www.genecards.org/cgi-bin/carddisp.pl?gene=CD33</a>         |
| NOX4     | NADPH Oxidase 4                                       | Protein Coding | 43 | GC11M089324 | 11.59755 | <a href="https://www.genecards.org/cgi-bin/carddisp.pl?gene=NOX4">https://www.genecards.org/cgi-bin/carddisp.pl?gene=NOX4</a>         |
| SLC9A3   | Solute Carrier Family 9 Member A3                     | Protein Coding | 47 | GC05M000472 | 11.59178 | <a href="https://www.genecards.org/cgi-bin/carddisp.pl?gene=SLC9A3">https://www.genecards.org/cgi-bin/carddisp.pl?gene=SLC9A3</a>     |
| AMPD1    | Adenosine Monophosphate Deaminase 1                   | Protein Coding | 46 | GC01M114673 | 11.59108 | <a href="https://www.genecards.org/cgi-bin/carddisp.pl?gene=AMPD1">https://www.genecards.org/cgi-bin/carddisp.pl?gene=AMPD1</a>       |
| MAN1B1   | Mannosidase Alpha Class 1B Member 1                   | Protein Coding | 47 | GC09P137086 | 11.58369 | <a href="https://www.genecards.org/cgi-bin/carddisp.pl?gene=MAN1B1">https://www.genecards.org/cgi-bin/carddisp.pl?gene=MAN1B1</a>     |
| MIR193B  | MicroRNA 193b                                         | RNA Gene       | 20 | GC16P014307 | 11.58105 | <a href="https://www.genecards.org/cgi-bin/carddisp.pl?gene=MIR193B">https://www.genecards.org/cgi-bin/carddisp.pl?gene=MIR193B</a>   |
| SLC22A1  | Solute Carrier Family 22 Member 1                     | Protein Coding | 44 | GC06P160121 | 11.58076 | <a href="https://www.genecards.org/cgi-bin/carddisp.pl?gene=SLC22A1">https://www.genecards.org/cgi-bin/carddisp.pl?gene=SLC22A1</a>   |
| FOXC1    | Forkhead Box C1                                       | Protein Coding | 43 | GC06P001610 | 11.58016 | <a href="https://www.genecards.org/cgi-bin/carddisp.pl?gene=FOXC1">https://www.genecards.org/cgi-bin/carddisp.pl?gene=FOXC1</a>       |
| RAD54L   | RAD54 Like                                            | Protein Coding | 47 | GC01P046278 | 11.57112 | <a href="https://www.genecards.org/cgi-bin/carddisp.pl?gene=RAD54L">https://www.genecards.org/cgi-bin/carddisp.pl?gene=RAD54L</a>     |
| COX7A2   | Cytochrome C Oxidase Subunit 7A2                      | Protein Coding | 39 | GC06M075237 | 11.56741 | <a href="https://www.genecards.org/cgi-bin/carddisp.pl?gene=COX7A2">https://www.genecards.org/cgi-bin/carddisp.pl?gene=COX7A2</a>     |
| DSPP     | Dentin Sialophosphoprotein                            | Protein Coding | 38 | GC04P087608 | 11.56214 | <a href="https://www.genecards.org/cgi-bin/carddisp.pl?gene=DSPP">https://www.genecards.org/cgi-bin/carddisp.pl?gene=DSPP</a>         |
| ANGPTL4  | Angiopoietin Like 4                                   | Protein Coding | 46 | GC19P008363 | 11.55891 | <a href="https://www.genecards.org/cgi-bin/carddisp.pl?gene=ANGPTL4">https://www.genecards.org/cgi-bin/carddisp.pl?gene=ANGPTL4</a>   |
| CYP24A1  | Cytochrome P450 Family 24 Subfamily A Member 1        | Protein Coding | 48 | GC20M054153 | 11.55513 | <a href="https://www.genecards.org/cgi-bin/carddisp.pl?gene=CYP24A1">https://www.genecards.org/cgi-bin/carddisp.pl?gene=CYP24A1</a>   |
| P2RX7    | Purinergic Receptor P2X 7                             | Protein Coding | 46 | GC12P123575 | 11.55426 | <a href="https://www.genecards.org/cgi-bin/carddisp.pl?gene=P2RX7">https://www.genecards.org/cgi-bin/carddisp.pl?gene=P2RX7</a>       |
| HLA-DRB5 | Major Histocompatibility Complex, Class II, DR Beta 5 | Protein Coding | 41 | GC06M046926 | 11.55396 | <a href="https://www.genecards.org/cgi-bin/carddisp.pl?gene=HLA-DRB5">https://www.genecards.org/cgi-bin/carddisp.pl?gene=HLA-DRB5</a> |

|         |                                                      |                |    |             |          |                                                                                                                                     |
|---------|------------------------------------------------------|----------------|----|-------------|----------|-------------------------------------------------------------------------------------------------------------------------------------|
| FEN1    | Flap Structure-Specific Endonuclease 1               | Protein Coding | 47 | GC11P061793 | 11.55333 | <a href="https://www.genecards.org/cgi-bin/carddisp.pl?gene=FEN1">https://www.genecards.org/cgi-bin/carddisp.pl?gene=FEN1</a>       |
| PTP4A1  | Protein Tyrosine Phosphatase 4A1                     | Protein Coding | 42 | GC06P063521 | 11.54701 | <a href="https://www.genecards.org/cgi-bin/carddisp.pl?gene=PTP4A1">https://www.genecards.org/cgi-bin/carddisp.pl?gene=PTP4A1</a>   |
| SOX6    | SRY-Box Transcription Factor 6                       | Protein Coding | 44 | GC11M015949 | 11.53486 | <a href="https://www.genecards.org/cgi-bin/carddisp.pl?gene=SOX6">https://www.genecards.org/cgi-bin/carddisp.pl?gene=SOX6</a>       |
| UQCRFS1 | Ubiquinol-Cytochrome C Reductase, Rieske Iron-Sulfur | Protein Coding | 47 | GC19M029205 | 11.53317 | <a href="https://www.genecards.org/cgi-bin/carddisp.pl?gene=UQCRFS1">https://www.genecards.org/cgi-bin/carddisp.pl?gene=UQCRFS1</a> |
| ERCC5   | Polypeptide 1 ERCC Excision Repair 5, Endonuclease   | Protein Coding | 45 | GC13P102845 | 11.52764 | <a href="https://www.genecards.org/cgi-bin/carddisp.pl?gene=ERCC5">https://www.genecards.org/cgi-bin/carddisp.pl?gene=ERCC5</a>     |
| FDPS    | Farnesyl Diphosphate Synthase                        | Protein Coding | 46 | GC01P155308 | 11.52526 | <a href="https://www.genecards.org/cgi-bin/carddisp.pl?gene=FDPS">https://www.genecards.org/cgi-bin/carddisp.pl?gene=FDPS</a>       |
| ACLY    | ATP Citrate Lyase                                    | Protein Coding | 47 | GC17M041866 | 11.51321 | <a href="https://www.genecards.org/cgi-bin/carddisp.pl?gene=ACLY">https://www.genecards.org/cgi-bin/carddisp.pl?gene=ACLY</a>       |
| USF1    | Upstream Transcription Factor 1                      | Protein Coding | 44 | GC01M161039 | 11.50987 | <a href="https://www.genecards.org/cgi-bin/carddisp.pl?gene=USF1">https://www.genecards.org/cgi-bin/carddisp.pl?gene=USF1</a>       |
| ITIH4   | Inter-Alpha-Trypsin Inhibitor Heavy Chain 4          | Protein Coding | 43 | GC03M052812 | 11.4992  | <a href="https://www.genecards.org/cgi-bin/carddisp.pl?gene=ITIH4">https://www.genecards.org/cgi-bin/carddisp.pl?gene=ITIH4</a>     |
| USP18   | Ubiquitin Specific Peptidase 18                      | Protein Coding | 41 | GC22P018149 | 11.49372 | <a href="https://www.genecards.org/cgi-bin/carddisp.pl?gene=USP18">https://www.genecards.org/cgi-bin/carddisp.pl?gene=USP18</a>     |
| COL12A1 | Collagen Type XII Alpha 1 Chain                      | Protein Coding | 42 | GC06M075084 | 11.49302 | <a href="https://www.genecards.org/cgi-bin/carddisp.pl?gene=COL12A1">https://www.genecards.org/cgi-bin/carddisp.pl?gene=COL12A1</a> |
| HSD11B2 | Hydroxysteroid 11-Beta Dehydrogenase 2               | Protein Coding | 47 | GC16P067433 | 11.4722  | <a href="https://www.genecards.org/cgi-bin/carddisp.pl?gene=HSD11B2">https://www.genecards.org/cgi-bin/carddisp.pl?gene=HSD11B2</a> |
| VANGL2  | VANGL Planar Cell Polarity Protein 2                 | Protein Coding | 44 | GC01P160400 | 11.47197 | <a href="https://www.genecards.org/cgi-bin/carddisp.pl?gene=VANGL2">https://www.genecards.org/cgi-bin/carddisp.pl?gene=VANGL2</a>   |
| DCLRE1C | DNA Cross-Link Repair 1C                             | Protein Coding | 45 | GC10M014897 | 11.47091 | <a href="https://www.genecards.org/cgi-bin/carddisp.pl?gene=DCLRE1C">https://www.genecards.org/cgi-bin/carddisp.pl?gene=DCLRE1C</a> |
| UBQLN4  | Ubiquilin 4                                          | Protein Coding | 40 | GC01M156033 | 11.46719 | <a href="https://www.genecards.org/cgi-bin/carddisp.pl?gene=UBQLN4">https://www.genecards.org/cgi-bin/carddisp.pl?gene=UBQLN4</a>   |
| CEACAM1 | CEA Cell Adhesion Molecule 1                         | Protein Coding | 43 | GC19M042507 | 11.46713 | <a href="https://www.genecards.org/cgi-bin/carddisp.pl?gene=CEACAM1">https://www.genecards.org/cgi-bin/carddisp.pl?gene=CEACAM1</a> |
| CCL17   | C-C Motif Chemokine Ligand 17                        | Protein Coding | 38 | GC16P057403 | 11.46223 | <a href="https://www.genecards.org/cgi-bin/carddisp.pl?gene=CCL17">https://www.genecards.org/cgi-bin/carddisp.pl?gene=CCL17</a>     |
| PRKCG   | Protein Kinase C Gamma                               | Protein Coding | 52 | GC19P053879 | 11.45537 | <a href="https://www.genecards.org/cgi-bin/carddisp.pl?gene=PRKCG">https://www.genecards.org/cgi-bin/carddisp.pl?gene=PRKCG</a>     |

|          |                                                                      |                |    |             |          |                                                                                                                                       |
|----------|----------------------------------------------------------------------|----------------|----|-------------|----------|---------------------------------------------------------------------------------------------------------------------------------------|
| CAMP     | Cathelicidin Antimicrobial Peptide Stimulator Of Interferon Response | Protein Coding | 42 | GC03P048342 | 11.45532 | <a href="https://www.genecards.org/cgi-bin/carddisp.pl?gene=CAMP">https://www.genecards.org/cgi-bin/carddisp.pl?gene=CAMP</a>         |
| STING1   | CGAMP Interactor 1                                                   | Protein Coding | 34 | GC05M139476 | 11.44921 | <a href="https://www.genecards.org/cgi-bin/carddisp.pl?gene=STING1">https://www.genecards.org/cgi-bin/carddisp.pl?gene=STING1</a>     |
| AOC3     | Amine Oxidase Copper Containing 3                                    | Protein Coding | 44 | GC17P042851 | 11.44919 | <a href="https://www.genecards.org/cgi-bin/carddisp.pl?gene=AOC3">https://www.genecards.org/cgi-bin/carddisp.pl?gene=AOC3</a>         |
| KCNE1    | Potassium Voltage-Gated Channel Subfamily E Regulatory Subunit 1     | Protein Coding | 45 | GC21M034446 | 11.43752 | <a href="https://www.genecards.org/cgi-bin/carddisp.pl?gene=KCNE1">https://www.genecards.org/cgi-bin/carddisp.pl?gene=KCNE1</a>       |
| CDH13    | Cadherin 13                                                          | Protein Coding | 44 | GC16P082626 | 11.43136 | <a href="https://www.genecards.org/cgi-bin/carddisp.pl?gene=CDH13">https://www.genecards.org/cgi-bin/carddisp.pl?gene=CDH13</a>       |
| BMP1     | Bone Morphogenetic Protein 1                                         | Protein Coding | 47 | GC08P022164 | 11.42709 | <a href="https://www.genecards.org/cgi-bin/carddisp.pl?gene=BMP1">https://www.genecards.org/cgi-bin/carddisp.pl?gene=BMP1</a>         |
| PRKCZ    | Protein Kinase C Zeta                                                | Protein Coding | 49 | GC01P002050 | 11.42618 | <a href="https://www.genecards.org/cgi-bin/carddisp.pl?gene=PRKCZ">https://www.genecards.org/cgi-bin/carddisp.pl?gene=PRKCZ</a>       |
| PAX3     | Paired Box 3                                                         | Protein Coding | 48 | GC02M222199 | 11.42553 | <a href="https://www.genecards.org/cgi-bin/carddisp.pl?gene=PAX3">https://www.genecards.org/cgi-bin/carddisp.pl?gene=PAX3</a>         |
| TUG1     | Taurine Up-Regulated 1                                               | RNA Gene       | 23 | GC22P030969 | 11.41941 | <a href="https://www.genecards.org/cgi-bin/carddisp.pl?gene=TUG1">https://www.genecards.org/cgi-bin/carddisp.pl?gene=TUG1</a>         |
| RHAG     | Rh Associated Glycoprotein                                           | Protein Coding | 45 | GC06M049605 | 11.41684 | <a href="https://www.genecards.org/cgi-bin/carddisp.pl?gene=RHAG">https://www.genecards.org/cgi-bin/carddisp.pl?gene=RHAG</a>         |
| NADK2    | NAD Kinase 2, Mitochondrial                                          | Protein Coding | 38 | GC05M036194 | 11.41531 | <a href="https://www.genecards.org/cgi-bin/carddisp.pl?gene=NADK2">https://www.genecards.org/cgi-bin/carddisp.pl?gene=NADK2</a>       |
| ARX      | Aristaless Related Homeobox Glycoprotein                             | Protein Coding | 43 | GC0XM025003 | 11.41329 | <a href="https://www.genecards.org/cgi-bin/carddisp.pl?gene=ARX">https://www.genecards.org/cgi-bin/carddisp.pl?gene=ARX</a>           |
| CGA      | Hormones, Alpha Polypeptide Arginine-                                | Protein Coding | 43 | GC06M087085 | 11.40474 | <a href="https://www.genecards.org/cgi-bin/carddisp.pl?gene=CGA">https://www.genecards.org/cgi-bin/carddisp.pl?gene=CGA</a>           |
| RERE     | Glutamic Acid Dipeptide Repeats                                      | Protein Coding | 42 | GC01M008364 | 11.40442 | <a href="https://www.genecards.org/cgi-bin/carddisp.pl?gene=RERE">https://www.genecards.org/cgi-bin/carddisp.pl?gene=RERE</a>         |
| ENPP2    | Ectonucleotide Pyrophosphatase/Phosphodiesterase 2                   | Protein Coding | 44 | GC08M119556 | 11.40085 | <a href="https://www.genecards.org/cgi-bin/carddisp.pl?gene=ENPP2">https://www.genecards.org/cgi-bin/carddisp.pl?gene=ENPP2</a>       |
| CD9      | CD9 Molecule                                                         | Protein Coding | 44 | GC12P011813 | 11.40051 | <a href="https://www.genecards.org/cgi-bin/carddisp.pl?gene=CD9">https://www.genecards.org/cgi-bin/carddisp.pl?gene=CD9</a>           |
| ADAMTSL1 | ADAMTS Like 1                                                        | Protein Coding | 42 | GC09P017906 | 11.39662 | <a href="https://www.genecards.org/cgi-bin/carddisp.pl?gene=ADAMTSL1">https://www.genecards.org/cgi-bin/carddisp.pl?gene=ADAMTSL1</a> |
| TRIP13   | Thyroid Hormone Receptor Interactor 13                               | Protein Coding | 41 | GC05P000892 | 11.38438 | <a href="https://www.genecards.org/cgi-bin/carddisp.pl?gene=TRIP13">https://www.genecards.org/cgi-bin/carddisp.pl?gene=TRIP13</a>     |

|         |                                                        |                |    |              |          |                                                                                                                                     |
|---------|--------------------------------------------------------|----------------|----|--------------|----------|-------------------------------------------------------------------------------------------------------------------------------------|
| IQSEC2  | IQ Motif And Sec7 Domain ArfGEF 2                      | Protein Coding | 38 | GC0XM053225  | 11.37843 | <a href="https://www.genecards.org/cgi-bin/carddisp.pl?gene=IQSEC2">https://www.genecards.org/cgi-bin/carddisp.pl?gene=IQSEC2</a>   |
| XRCC5   | X-Ray Repair Cross Complementin g 5                    | Protein Coding | 45 | GC02P216107  | 11.36979 | <a href="https://www.genecards.org/cgi-bin/carddisp.pl?gene=XRCC5">https://www.genecards.org/cgi-bin/carddisp.pl?gene=XRCC5</a>     |
| REG3A   | Regenerating Family Member 3 Alpha                     | Protein Coding | 40 | GC02M079157  | 11.36031 | <a href="https://www.genecards.org/cgi-bin/carddisp.pl?gene=REG3A">https://www.genecards.org/cgi-bin/carddisp.pl?gene=REG3A</a>     |
| MEGF10  | Multiple EGF Like Domains 10                           | Protein Coding | 41 | GC05P127230  | 11.3457  | <a href="https://www.genecards.org/cgi-bin/carddisp.pl?gene=MEGF10">https://www.genecards.org/cgi-bin/carddisp.pl?gene=MEGF10</a>   |
| SNCG    | Synuclein Gamma                                        | Protein Coding | 42 | GC10P086957  | 11.34427 | <a href="https://www.genecards.org/cgi-bin/carddisp.pl?gene=SNCG">https://www.genecards.org/cgi-bin/carddisp.pl?gene=SNCG</a>       |
| BLM     | BLM RecQ Like Helicase                                 | Protein Coding | 50 | GC15P090717  | 11.34175 | <a href="https://www.genecards.org/cgi-bin/carddisp.pl?gene=BLM">https://www.genecards.org/cgi-bin/carddisp.pl?gene=BLM</a>         |
| HRH1    | Histamine Receptor H1                                  | Protein Coding | 46 | GC03P011113  | 11.3393  | <a href="https://www.genecards.org/cgi-bin/carddisp.pl?gene=HRH1">https://www.genecards.org/cgi-bin/carddisp.pl?gene=HRH1</a>       |
| MT-TS2  | Mitochondrially Encoded TRNA-Ser (AGU/C) 2             | RNA Gene       | 13 | GCMTTP012215 | 11.3355  | <a href="https://www.genecards.org/cgi-bin/carddisp.pl?gene=MT-TS2">https://www.genecards.org/cgi-bin/carddisp.pl?gene=MT-TS2</a>   |
| DDB2    | Damage Specific DNA Binding Protein 2                  | Protein Coding | 47 | GC11P047237  | 11.33326 | <a href="https://www.genecards.org/cgi-bin/carddisp.pl?gene=DDB2">https://www.genecards.org/cgi-bin/carddisp.pl?gene=DDB2</a>       |
| HLA-DRA | Major Histocompatibility Complex, Class II, DR Alpha   | Protein Coding | 48 | GC06P032439  | 11.33316 | <a href="https://www.genecards.org/cgi-bin/carddisp.pl?gene=HLA-DRA">https://www.genecards.org/cgi-bin/carddisp.pl?gene=HLA-DRA</a> |
| XPA     | XPA, DNA Damage Recognition And Repair Factor          | Protein Coding | 47 | GC09M097654  | 11.33177 | <a href="https://www.genecards.org/cgi-bin/carddisp.pl?gene=XPA">https://www.genecards.org/cgi-bin/carddisp.pl?gene=XPA</a>         |
| PLA2G10 | Phospholipase A2 Group X                               | Protein Coding | 44 | GC16M014672  | 11.32912 | <a href="https://www.genecards.org/cgi-bin/carddisp.pl?gene=PLA2G10">https://www.genecards.org/cgi-bin/carddisp.pl?gene=PLA2G10</a> |
| PGF     | Placental Growth Factor                                | Protein Coding | 44 | GC14M074941  | 11.32776 | <a href="https://www.genecards.org/cgi-bin/carddisp.pl?gene=PGF">https://www.genecards.org/cgi-bin/carddisp.pl?gene=PGF</a>         |
| GOT1    | Glutamic-Oxaloacetic Transaminase 1                    | Protein Coding | 47 | GC10M099396  | 11.32726 | <a href="https://www.genecards.org/cgi-bin/carddisp.pl?gene=GOT1">https://www.genecards.org/cgi-bin/carddisp.pl?gene=GOT1</a>       |
| CSNK1A1 | Casein Kinase 1 Alpha 1                                | Protein Coding | 50 | GC05M149492  | 11.32133 | <a href="https://www.genecards.org/cgi-bin/carddisp.pl?gene=CSNK1A1">https://www.genecards.org/cgi-bin/carddisp.pl?gene=CSNK1A1</a> |
| PLCB4   | Phospholipase C Beta 4                                 | Protein Coding | 48 | GC20P009024  | 11.31773 | <a href="https://www.genecards.org/cgi-bin/carddisp.pl?gene=PLCB4">https://www.genecards.org/cgi-bin/carddisp.pl?gene=PLCB4</a>     |
| ZADH2   | Zinc Binding Alcohol Dehydrogenase Domain Containing 2 | Protein Coding | 38 | GC18M075195  | 11.31729 | <a href="https://www.genecards.org/cgi-bin/carddisp.pl?gene=ZADH2">https://www.genecards.org/cgi-bin/carddisp.pl?gene=ZADH2</a>     |
| NAT1    | N-Acetyltransferase 1                                  | Protein Coding | 45 | GC08P018179  | 11.31726 | <a href="https://www.genecards.org/cgi-bin/carddisp.pl?gene=NAT1">https://www.genecards.org/cgi-bin/carddisp.pl?gene=NAT1</a>       |

|        |                                                     |                |    |             |          |                                                                                                                                   |
|--------|-----------------------------------------------------|----------------|----|-------------|----------|-----------------------------------------------------------------------------------------------------------------------------------|
| HYOU1  | Hypoxia Up-Regulated 1                              | Protein Coding | 44 | GC11M119045 | 11.30558 | <a href="https://www.genecards.org/cgi-bin/carddisp.pl?gene=HYOU1">https://www.genecards.org/cgi-bin/carddisp.pl?gene=HYOU1</a>   |
| CUL4B  | Cullin 4B                                           | Protein Coding | 44 | GC0XM120524 | 11.28912 | <a href="https://www.genecards.org/cgi-bin/carddisp.pl?gene=CUL4B">https://www.genecards.org/cgi-bin/carddisp.pl?gene=CUL4B</a>   |
| HPSE   | Heparanase                                          | Protein Coding | 45 | GC04M083292 | 11.28895 | <a href="https://www.genecards.org/cgi-bin/carddisp.pl?gene=HPSE">https://www.genecards.org/cgi-bin/carddisp.pl?gene=HPSE</a>     |
| DTNBP1 | Dystrobrevin Binding Protein 1                      | Protein Coding | 42 | GC06M015470 | 11.27631 | <a href="https://www.genecards.org/cgi-bin/carddisp.pl?gene=DTNBP1">https://www.genecards.org/cgi-bin/carddisp.pl?gene=DTNBP1</a> |
| ASGR1  | Asialoglycoprotein Receptor 1                       | Protein Coding | 41 | GC17M007173 | 11.27588 | <a href="https://www.genecards.org/cgi-bin/carddisp.pl?gene=ASGR1">https://www.genecards.org/cgi-bin/carddisp.pl?gene=ASGR1</a>   |
| PRPF8  | Pre-MRNA Processing Factor 8                        | Protein Coding | 42 | GC17M001650 | 11.27551 | <a href="https://www.genecards.org/cgi-bin/carddisp.pl?gene=PRPF8">https://www.genecards.org/cgi-bin/carddisp.pl?gene=PRPF8</a>   |
| NOTCH4 | Notch Receptor 4                                    | Protein Coding | 45 | GC06M046911 | 11.27038 | <a href="https://www.genecards.org/cgi-bin/carddisp.pl?gene=NOTCH4">https://www.genecards.org/cgi-bin/carddisp.pl?gene=NOTCH4</a> |
| EHMT1  | Euchromatic Histone Lysine Methyltransferase 1      | Protein Coding | 46 | GC09P137618 | 11.25163 | <a href="https://www.genecards.org/cgi-bin/carddisp.pl?gene=EHMT1">https://www.genecards.org/cgi-bin/carddisp.pl?gene=EHMT1</a>   |
| CERT1  | Ceramide Transporter 1                              | Protein Coding | 34 | GC05M075356 | 11.2511  | <a href="https://www.genecards.org/cgi-bin/carddisp.pl?gene=CERT1">https://www.genecards.org/cgi-bin/carddisp.pl?gene=CERT1</a>   |
| NCOA3  | Nuclear Receptor Coactivator 3                      | Protein Coding | 47 | GC20P047501 | 11.24948 | <a href="https://www.genecards.org/cgi-bin/carddisp.pl?gene=NCOA3">https://www.genecards.org/cgi-bin/carddisp.pl?gene=NCOA3</a>   |
| MATN3  | Matrilin 3                                          | Protein Coding | 43 | GC02M019992 | 11.2486  | <a href="https://www.genecards.org/cgi-bin/carddisp.pl?gene=MATN3">https://www.genecards.org/cgi-bin/carddisp.pl?gene=MATN3</a>   |
| ARNTL  | Aryl Hydrocarbon Receptor Nuclear Translocator Like | Protein Coding | 43 | GC11P013276 | 11.24733 | <a href="https://www.genecards.org/cgi-bin/carddisp.pl?gene=ARNTL">https://www.genecards.org/cgi-bin/carddisp.pl?gene=ARNTL</a>   |
| AP1B1  | Adaptor Related Protein Complex 1 Subunit Beta 1    | Protein Coding | 44 | GC22M029327 | 11.24632 | <a href="https://www.genecards.org/cgi-bin/carddisp.pl?gene=AP1B1">https://www.genecards.org/cgi-bin/carddisp.pl?gene=AP1B1</a>   |
| FBXW7  | F-Box And WD Repeat Domain Containing 7             | Protein Coding | 45 | GC04M152321 | 11.2374  | <a href="https://www.genecards.org/cgi-bin/carddisp.pl?gene=FBXW7">https://www.genecards.org/cgi-bin/carddisp.pl?gene=FBXW7</a>   |
| MRPS7  | Mitochondrial Ribosomal Protein S7                  | Protein Coding | 39 | GC17P075262 | 11.23643 | <a href="https://www.genecards.org/cgi-bin/carddisp.pl?gene=MRPS7">https://www.genecards.org/cgi-bin/carddisp.pl?gene=MRPS7</a>   |
| MIP    | Major Intrinsic Protein Of Lens Fiber               | Protein Coding | 42 | GC12M056449 | 11.23009 | <a href="https://www.genecards.org/cgi-bin/carddisp.pl?gene=MIP">https://www.genecards.org/cgi-bin/carddisp.pl?gene=MIP</a>       |
| PIK3R3 | Phosphoinositide-3-Kinase Regulatory Subunit 3      | Protein Coding | 44 | GC01M046041 | 11.22481 | <a href="https://www.genecards.org/cgi-bin/carddisp.pl?gene=PIK3R3">https://www.genecards.org/cgi-bin/carddisp.pl?gene=PIK3R3</a> |
| IFT52  | Intraflagellar Transport 52                         | Protein Coding | 36 | GC20P043590 | 11.22094 | <a href="https://www.genecards.org/cgi-bin/carddisp.pl?gene=IFT52">https://www.genecards.org/cgi-bin/carddisp.pl?gene=IFT52</a>   |



|          |                                                        |                |    |             |          |                                                                                                                                       |
|----------|--------------------------------------------------------|----------------|----|-------------|----------|---------------------------------------------------------------------------------------------------------------------------------------|
| PIK3C3   | Phosphatidylinositol 3-Kinase Catalytic Subunit Type 3 | Protein Coding | 50 | GC18P041955 | 11.21018 | <a href="https://www.genecards.org/cgi-bin/carddisp.pl?gene=PIK3C3">https://www.genecards.org/cgi-bin/carddisp.pl?gene=PIK3C3</a>     |
| ATP6V0A2 | ATPase H <sup>+</sup> Transporting V0 Subunit A2       | Protein Coding | 45 | GC12P123712 | 11.20102 | <a href="https://www.genecards.org/cgi-bin/carddisp.pl?gene=ATP6V0A2">https://www.genecards.org/cgi-bin/carddisp.pl?gene=ATP6V0A2</a> |
| FOXF1    | Forkhead Box F1                                        | Protein Coding | 43 | GC16P086510 | 11.20051 | <a href="https://www.genecards.org/cgi-bin/carddisp.pl?gene=FOXF1">https://www.genecards.org/cgi-bin/carddisp.pl?gene=FOXF1</a>       |
| NUP133   | Nucleoporin 133                                        | Protein Coding | 41 | GC01M229441 | 11.19899 | <a href="https://www.genecards.org/cgi-bin/carddisp.pl?gene=NUP133">https://www.genecards.org/cgi-bin/carddisp.pl?gene=NUP133</a>     |
| SLC19A2  | Solute Carrier Family 19 Member 2                      | Protein Coding | 46 | GC01M169463 | 11.19438 | <a href="https://www.genecards.org/cgi-bin/carddisp.pl?gene=SLC19A2">https://www.genecards.org/cgi-bin/carddisp.pl?gene=SLC19A2</a>   |
| GHSR     | Growth Hormone Secretagogue Receptor                   | Protein Coding | 48 | GC03M172443 | 11.18972 | <a href="https://www.genecards.org/cgi-bin/carddisp.pl?gene=GHSR">https://www.genecards.org/cgi-bin/carddisp.pl?gene=GHSR</a>         |
| MIR95    | MicroRNA 95                                            | RNA Gene       | 16 | GC04M008007 | 11.18044 | <a href="https://www.genecards.org/cgi-bin/carddisp.pl?gene=MIR95">https://www.genecards.org/cgi-bin/carddisp.pl?gene=MIR95</a>       |
| TRIM21   | Tripartite Motif Containing 21                         | Protein Coding | 43 | GC11M004384 | 11.17753 | <a href="https://www.genecards.org/cgi-bin/carddisp.pl?gene=TRIM21">https://www.genecards.org/cgi-bin/carddisp.pl?gene=TRIM21</a>     |
| SERPINB3 | Serpin Family B Member 3                               | Protein Coding | 43 | GC18M063655 | 11.17457 | <a href="https://www.genecards.org/cgi-bin/carddisp.pl?gene=SERPINB3">https://www.genecards.org/cgi-bin/carddisp.pl?gene=SERPINB3</a> |
| HSP90B1  | Heat Shock Protein 90 Beta Family Member 1             | Protein Coding | 47 | GC12P103930 | 11.16833 | <a href="https://www.genecards.org/cgi-bin/carddisp.pl?gene=HSP90B1">https://www.genecards.org/cgi-bin/carddisp.pl?gene=HSP90B1</a>   |
| LCK      | LCK Proto-Oncogene, Src Family Tyrosine Kinase         | Protein Coding | 53 | GC01P032251 | 11.16592 | <a href="https://www.genecards.org/cgi-bin/carddisp.pl?gene=LCK">https://www.genecards.org/cgi-bin/carddisp.pl?gene=LCK</a>           |
| NTRK3    | Neurotrophic Receptor Tyrosine Kinase 3                | Protein Coding | 52 | GC15M087859 | 11.16512 | <a href="https://www.genecards.org/cgi-bin/carddisp.pl?gene=NTRK3">https://www.genecards.org/cgi-bin/carddisp.pl?gene=NTRK3</a>       |
| SEMA3A   | Semaphorin 3A                                          | Protein Coding | 45 | GC07M083955 | 11.1553  | <a href="https://www.genecards.org/cgi-bin/carddisp.pl?gene=SEMA3A">https://www.genecards.org/cgi-bin/carddisp.pl?gene=SEMA3A</a>     |
| MAP3K7   | Mitogen-Activated Protein Kinase Kinase 7              | Protein Coding | 51 | GC06M090513 | 11.15236 | <a href="https://www.genecards.org/cgi-bin/carddisp.pl?gene=MAP3K7">https://www.genecards.org/cgi-bin/carddisp.pl?gene=MAP3K7</a>     |
| IFNAR1   | Interferon Alpha And Beta Receptor Subunit 1           | Protein Coding | 45 | GC21P033324 | 11.14013 | <a href="https://www.genecards.org/cgi-bin/carddisp.pl?gene=IFNAR1">https://www.genecards.org/cgi-bin/carddisp.pl?gene=IFNAR1</a>     |
| MIR128-1 | MicroRNA 128-1                                         | RNA Gene       | 19 | GC02P135665 | 11.13795 | <a href="https://www.genecards.org/cgi-bin/carddisp.pl?gene=MIR128-1">https://www.genecards.org/cgi-bin/carddisp.pl?gene=MIR128-1</a> |
| CUL3     | Cullin 3                                               | Protein Coding | 47 | GC02M224470 | 11.13085 | <a href="https://www.genecards.org/cgi-bin/carddisp.pl?gene=CUL3">https://www.genecards.org/cgi-bin/carddisp.pl?gene=CUL3</a>         |
| ELP1     | Elongator Acetyltransferase Complex Subunit 1          | Protein Coding | 34 | GC09M108868 | 11.12138 | <a href="https://www.genecards.org/cgi-bin/carddisp.pl?gene=ELP1">https://www.genecards.org/cgi-bin/carddisp.pl?gene=ELP1</a>         |

|         |                                                                         |                |    |             |          |                                                                                                                                     |
|---------|-------------------------------------------------------------------------|----------------|----|-------------|----------|-------------------------------------------------------------------------------------------------------------------------------------|
| SRF     | Serum Response Factor                                                   | Protein Coding | 42 | GC06P043171 | 11.11334 | <a href="https://www.genecards.org/cgi-bin/carddisp.pl?gene=SRF">https://www.genecards.org/cgi-bin/carddisp.pl?gene=SRF</a>         |
| PNMT    | Phenylethanolamine N-Methyltransferase                                  | Protein Coding | 45 | GC17P039667 | 11.10462 | <a href="https://www.genecards.org/cgi-bin/carddisp.pl?gene=PNMT">https://www.genecards.org/cgi-bin/carddisp.pl?gene=PNMT</a>       |
| RRAS2   | RAS Related 2                                                           | Protein Coding | 47 | GC11M014299 | 11.10217 | <a href="https://www.genecards.org/cgi-bin/carddisp.pl?gene=RRAS2">https://www.genecards.org/cgi-bin/carddisp.pl?gene=RRAS2</a>     |
| ID2     | Inhibitor Of DNA Binding 2                                              | Protein Coding | 45 | GC02P008678 | 11.08912 | <a href="https://www.genecards.org/cgi-bin/carddisp.pl?gene=ID2">https://www.genecards.org/cgi-bin/carddisp.pl?gene=ID2</a>         |
| TFF1    | Trefoil Factor 1                                                        | Protein Coding | 45 | GC21M042362 | 11.08742 | <a href="https://www.genecards.org/cgi-bin/carddisp.pl?gene=TFF1">https://www.genecards.org/cgi-bin/carddisp.pl?gene=TFF1</a>       |
| NMNAT1  | Nicotinamide Nucleotide Adenylyltransferase 1                           | Protein Coding | 49 | GC01P009944 | 11.07916 | <a href="https://www.genecards.org/cgi-bin/carddisp.pl?gene=NMNAT1">https://www.genecards.org/cgi-bin/carddisp.pl?gene=NMNAT1</a>   |
| BCOR    | BCL6 Corepressor                                                        | Protein Coding | 43 | GC0XM040049 | 11.07503 | <a href="https://www.genecards.org/cgi-bin/carddisp.pl?gene=BCOR">https://www.genecards.org/cgi-bin/carddisp.pl?gene=BCOR</a>       |
| SFRP4   | Secreted Frizzled Related Protein 4                                     | Protein Coding | 44 | GC07M037912 | 11.06559 | <a href="https://www.genecards.org/cgi-bin/carddisp.pl?gene=SFRP4">https://www.genecards.org/cgi-bin/carddisp.pl?gene=SFRP4</a>     |
| TOP2A   | DNA Topoisomerase II Alpha                                              | Protein Coding | 51 | GC17M040388 | 11.05639 | <a href="https://www.genecards.org/cgi-bin/carddisp.pl?gene=TOP2A">https://www.genecards.org/cgi-bin/carddisp.pl?gene=TOP2A</a>     |
| RYR3    | Ryanodine Receptor 3                                                    | Protein Coding | 42 | GC15P033310 | 11.05561 | <a href="https://www.genecards.org/cgi-bin/carddisp.pl?gene=RYR3">https://www.genecards.org/cgi-bin/carddisp.pl?gene=RYR3</a>       |
| SLC35A2 | Solute Carrier Family 35 Member A2                                      | Protein Coding | 41 | GC0XM048903 | 11.05312 | <a href="https://www.genecards.org/cgi-bin/carddisp.pl?gene=SLC35A2">https://www.genecards.org/cgi-bin/carddisp.pl?gene=SLC35A2</a> |
| LAMB1   | Laminin Subunit Beta 1                                                  | Protein Coding | 48 | GC07M107923 | 11.04553 | <a href="https://www.genecards.org/cgi-bin/carddisp.pl?gene=LAMB1">https://www.genecards.org/cgi-bin/carddisp.pl?gene=LAMB1</a>     |
| PACS1   | Phosphofurin Acidic Cluster Sorting Protein 1                           | Protein Coding | 41 | GC11P066320 | 11.04384 | <a href="https://www.genecards.org/cgi-bin/carddisp.pl?gene=PACS1">https://www.genecards.org/cgi-bin/carddisp.pl?gene=PACS1</a>     |
| AIMP1   | Aminoacyl tRNA Synthetase Complex Interacting Multifunctional Protein 1 | Protein Coding | 43 | GC04P106315 | 11.04274 | <a href="https://www.genecards.org/cgi-bin/carddisp.pl?gene=AIMP1">https://www.genecards.org/cgi-bin/carddisp.pl?gene=AIMP1</a>     |
| TRH     | Thyrotropin Releasing Hormone                                           | Protein Coding | 44 | GC03P129974 | 11.03993 | <a href="https://www.genecards.org/cgi-bin/carddisp.pl?gene=TRH">https://www.genecards.org/cgi-bin/carddisp.pl?gene=TRH</a>         |
| MYPN    | Myopalladin                                                             | Protein Coding | 41 | GC10P068106 | 11.02614 | <a href="https://www.genecards.org/cgi-bin/carddisp.pl?gene=MYPN">https://www.genecards.org/cgi-bin/carddisp.pl?gene=MYPN</a>       |
| RTN4    | Reticulon 4                                                             | Protein Coding | 45 | GC02M054934 | 11.01538 | <a href="https://www.genecards.org/cgi-bin/carddisp.pl?gene=RTN4">https://www.genecards.org/cgi-bin/carddisp.pl?gene=RTN4</a>       |
| ARID2   | AT-Rich Interaction Domain 2                                            | Protein Coding | 42 | GC12P045729 | 11.01487 | <a href="https://www.genecards.org/cgi-bin/carddisp.pl?gene=ARID2">https://www.genecards.org/cgi-bin/carddisp.pl?gene=ARID2</a>     |
| FGF3    | Fibroblast Growth Factor 3                                              | Protein Coding | 44 | GC11M070491 | 11.01358 | <a href="https://www.genecards.org/cgi-bin/carddisp.pl?gene=FGF3">https://www.genecards.org/cgi-bin/carddisp.pl?gene=FGF3</a>       |

|         |                                                                                                   |                |    |             |          |                                                                                                                                     |
|---------|---------------------------------------------------------------------------------------------------|----------------|----|-------------|----------|-------------------------------------------------------------------------------------------------------------------------------------|
| EPHB4   | EPH Receptor B4                                                                                   | Protein Coding | 52 | GC07M100803 | 11.01281 | <a href="https://www.genecards.org/cgi-bin/carddisp.pl?gene=EPHB4">https://www.genecards.org/cgi-bin/carddisp.pl?gene=EPHB4</a>     |
| ITGA6   | Integrin Subunit Alpha 6                                                                          | Protein Coding | 50 | GC02P172427 | 11.00565 | <a href="https://www.genecards.org/cgi-bin/carddisp.pl?gene=ITGA6">https://www.genecards.org/cgi-bin/carddisp.pl?gene=ITGA6</a>     |
| SMARCE1 | SWI/SNF Related, Matrix Associated, Actin Dependent Regulator Of Chromatin, Subfamily E, Member 1 | Protein Coding | 46 | GC17M040624 | 10.99075 | <a href="https://www.genecards.org/cgi-bin/carddisp.pl?gene=SMARCE1">https://www.genecards.org/cgi-bin/carddisp.pl?gene=SMARCE1</a> |
| SEPTIN9 | Septin 9                                                                                          | Protein Coding | 36 | GC17P077282 | 10.98312 | <a href="https://www.genecards.org/cgi-bin/carddisp.pl?gene=SEPTIN9">https://www.genecards.org/cgi-bin/carddisp.pl?gene=SEPTIN9</a> |
| SNAP25  | Synaptosome Associated Protein 25                                                                 | Protein Coding | 51 | GC20P010218 | 10.975   | <a href="https://www.genecards.org/cgi-bin/carddisp.pl?gene=SNAP25">https://www.genecards.org/cgi-bin/carddisp.pl?gene=SNAP25</a>   |
| TLR6    | Toll Like Receptor 6                                                                              | Protein Coding | 44 | GC04M038828 | 10.96395 | <a href="https://www.genecards.org/cgi-bin/carddisp.pl?gene=TLR6">https://www.genecards.org/cgi-bin/carddisp.pl?gene=TLR6</a>       |
| MIR30C1 | MicroRNA 30c-1                                                                                    | RNA Gene       | 22 | GC01P040757 | 10.96354 | <a href="https://www.genecards.org/cgi-bin/carddisp.pl?gene=MIR30C1">https://www.genecards.org/cgi-bin/carddisp.pl?gene=MIR30C1</a> |
| RORC    | RAR Related Orphan Receptor C RNA                                                                 | Protein Coding | 46 | GC01M151806 | 10.96266 | <a href="https://www.genecards.org/cgi-bin/carddisp.pl?gene=RORC">https://www.genecards.org/cgi-bin/carddisp.pl?gene=RORC</a>       |
| RMRP    | Component Of Mitochondrial RNA Processing Endoribonuclease                                        | RNA Gene       | 26 | GC09M035655 | 10.95343 | <a href="https://www.genecards.org/cgi-bin/carddisp.pl?gene=RMRP">https://www.genecards.org/cgi-bin/carddisp.pl?gene=RMRP</a>       |
| CCR3    | C-C Motif Chemokine Receptor 3                                                                    | Protein Coding | 47 | GC03P046163 | 10.94798 | <a href="https://www.genecards.org/cgi-bin/carddisp.pl?gene=CCR3">https://www.genecards.org/cgi-bin/carddisp.pl?gene=CCR3</a>       |
| GP6     | Glycoprotein VI Platelet Calcium                                                                  | Protein Coding | 45 | GC19M055013 | 10.93406 | <a href="https://www.genecards.org/cgi-bin/carddisp.pl?gene=GP6">https://www.genecards.org/cgi-bin/carddisp.pl?gene=GP6</a>         |
| CACNA1H | Voltage-Gated Channel Subunit Alpha1 H                                                            | Protein Coding | 51 | GC16P001153 | 10.92992 | <a href="https://www.genecards.org/cgi-bin/carddisp.pl?gene=CACNA1H">https://www.genecards.org/cgi-bin/carddisp.pl?gene=CACNA1H</a> |
| LONP1   | Lon Peptidase 1, Mitochondrial                                                                    | Protein Coding | 44 | GC19M005691 | 10.9264  | <a href="https://www.genecards.org/cgi-bin/carddisp.pl?gene=LONP1">https://www.genecards.org/cgi-bin/carddisp.pl?gene=LONP1</a>     |
| WNT7A   | Wnt Family Member 7A Caseinolytic Mitochondrial                                                   | Protein Coding | 50 | GC03M016916 | 10.92104 | <a href="https://www.genecards.org/cgi-bin/carddisp.pl?gene=WNT7A">https://www.genecards.org/cgi-bin/carddisp.pl?gene=WNT7A</a>     |
| CLPB    | Matrix Peptidase Chaperone Subunit B                                                              | Protein Coding | 44 | GC11M072286 | 10.91575 | <a href="https://www.genecards.org/cgi-bin/carddisp.pl?gene=CLPB">https://www.genecards.org/cgi-bin/carddisp.pl?gene=CLPB</a>       |

|        |                                                                       |                   |    |                 |          |                                                                                                                                   |
|--------|-----------------------------------------------------------------------|-------------------|----|-----------------|----------|-----------------------------------------------------------------------------------------------------------------------------------|
| NSMCE2 | NSE2 (MMS21)<br>Homolog,<br>SMC5-SMC6<br>Complex<br>SUMO Ligase       | Protein<br>Coding | 39 | GC08P1250<br>91 | 10.91563 | <a href="https://www.genecards.org/cgi-bin/carddisp.pl?gene=NSMCE2">https://www.genecards.org/cgi-bin/carddisp.pl?gene=NSMCE2</a> |
| COL6A3 | Collagen Type<br>VI Alpha 3<br>Chain                                  | Protein<br>Coding | 44 | GC02M237<br>324 | 10.91505 | <a href="https://www.genecards.org/cgi-bin/carddisp.pl?gene=COL6A3">https://www.genecards.org/cgi-bin/carddisp.pl?gene=COL6A3</a> |
| ACAA2  | Acetyl-CoA<br>Acyltransferase<br>2                                    | Protein<br>Coding | 44 | GC18M049<br>782 | 10.91199 | <a href="https://www.genecards.org/cgi-bin/carddisp.pl?gene=ACAA2">https://www.genecards.org/cgi-bin/carddisp.pl?gene=ACAA2</a>   |
| SRSF2  | Serine And<br>Arginine Rich<br>Splicing Factor<br>2                   | Protein<br>Coding | 41 | GC17M076<br>734 | 10.90971 | <a href="https://www.genecards.org/cgi-bin/carddisp.pl?gene=SRSF2">https://www.genecards.org/cgi-bin/carddisp.pl?gene=SRSF2</a>   |
| ALG3   | ALG3 Alpha-<br>1,3-<br>Mannosyltransf<br>erase                        | Protein<br>Coding | 42 | GC03M184<br>244 | 10.90968 | <a href="https://www.genecards.org/cgi-bin/carddisp.pl?gene=ALG3">https://www.genecards.org/cgi-bin/carddisp.pl?gene=ALG3</a>     |
| SPRTN  | SprT-Like N-<br>Terminal<br>Domain                                    | Protein<br>Coding | 36 | GC01P2313<br>37 | 10.89466 | <a href="https://www.genecards.org/cgi-bin/carddisp.pl?gene=SPRTN">https://www.genecards.org/cgi-bin/carddisp.pl?gene=SPRTN</a>   |
| CCR7   | C-C Motif<br>Chemokine<br>Receptor 7                                  | Protein<br>Coding | 45 | GC17M040<br>556 | 10.88799 | <a href="https://www.genecards.org/cgi-bin/carddisp.pl?gene=CCR7">https://www.genecards.org/cgi-bin/carddisp.pl?gene=CCR7</a>     |
| EXT1   | Exostosin<br>Glycosyltransfer<br>ase 1                                | Protein<br>Coding | 50 | GC08M117<br>798 | 10.87894 | <a href="https://www.genecards.org/cgi-bin/carddisp.pl?gene=EXT1">https://www.genecards.org/cgi-bin/carddisp.pl?gene=EXT1</a>     |
| PRLR   | Prolactin<br>Receptor                                                 | Protein<br>Coding | 48 | GC05M035<br>048 | 10.87375 | <a href="https://www.genecards.org/cgi-bin/carddisp.pl?gene=PRLR">https://www.genecards.org/cgi-bin/carddisp.pl?gene=PRLR</a>     |
| GAP43  | Growth<br>Associated<br>Protein 43                                    | Protein<br>Coding | 44 | GC03P1156<br>23 | 10.87299 | <a href="https://www.genecards.org/cgi-bin/carddisp.pl?gene=GAP43">https://www.genecards.org/cgi-bin/carddisp.pl?gene=GAP43</a>   |
| GPX4   | Glutathione<br>Peroxidase 4                                           | Protein<br>Coding | 48 | GC19P0011<br>03 | 10.87004 | <a href="https://www.genecards.org/cgi-bin/carddisp.pl?gene=GPX4">https://www.genecards.org/cgi-bin/carddisp.pl?gene=GPX4</a>     |
| KAT6A  | Lysine<br>Acetyltransfera<br>se 6A                                    | Protein<br>Coding | 44 | GC08M041<br>929 | 10.86986 | <a href="https://www.genecards.org/cgi-bin/carddisp.pl?gene=KAT6A">https://www.genecards.org/cgi-bin/carddisp.pl?gene=KAT6A</a>   |
| SET    | SET Nuclear<br>Proto-<br>Oncogene                                     | Protein<br>Coding | 47 | GC09P1286<br>84 | 10.85428 | <a href="https://www.genecards.org/cgi-bin/carddisp.pl?gene=SET">https://www.genecards.org/cgi-bin/carddisp.pl?gene=SET</a>       |
| CD247  | CD247<br>Molecule                                                     | Protein<br>Coding | 50 | GC01M167<br>399 | 10.84979 | <a href="https://www.genecards.org/cgi-bin/carddisp.pl?gene=CD247">https://www.genecards.org/cgi-bin/carddisp.pl?gene=CD247</a>   |
| ATXN10 | Ataxin 10                                                             | Protein<br>Coding | 43 | GC22P0456<br>73 | 10.84245 | <a href="https://www.genecards.org/cgi-bin/carddisp.pl?gene=ATXN10">https://www.genecards.org/cgi-bin/carddisp.pl?gene=ATXN10</a> |
| UQCRQ  | Ubiquinol-<br>Cytochrome C<br>Reductase<br>Complex III<br>Subunit VII | Protein<br>Coding | 42 | GC05P1328<br>66 | 10.83769 | <a href="https://www.genecards.org/cgi-bin/carddisp.pl?gene=UQCRQ">https://www.genecards.org/cgi-bin/carddisp.pl?gene=UQCRQ</a>   |
| CCL18  | C-C Motif<br>Chemokine<br>Ligand 18                                   | Protein<br>Coding | 37 | GC17P0360<br>64 | 10.83279 | <a href="https://www.genecards.org/cgi-bin/carddisp.pl?gene=CCL18">https://www.genecards.org/cgi-bin/carddisp.pl?gene=CCL18</a>   |
| LYRM4  | LYR Motif<br>Containing 4                                             | Protein<br>Coding | 38 | GC06M005<br>032 | 10.83076 | <a href="https://www.genecards.org/cgi-bin/carddisp.pl?gene=LYRM4">https://www.genecards.org/cgi-bin/carddisp.pl?gene=LYRM4</a>   |

|         |                                                                                               |                |    |             |          |                                                                                                                                     |
|---------|-----------------------------------------------------------------------------------------------|----------------|----|-------------|----------|-------------------------------------------------------------------------------------------------------------------------------------|
| RAP1A   | RAP1A, Member Of RAS Oncogene Family                                                          | Protein Coding | 46 | GC01P111542 | 10.82726 | <a href="https://www.genecards.org/cgi-bin/carddisp.pl?gene=RAP1A">https://www.genecards.org/cgi-bin/carddisp.pl?gene=RAP1A</a>     |
| DCAF8   | DDB1 And CUL4 Associated Factor 8 Ubiquitin Recognition Factor In ER Associated Degradation 1 | Protein Coding | 38 | GC01M160215 | 10.8264  | <a href="https://www.genecards.org/cgi-bin/carddisp.pl?gene=DCAF8">https://www.genecards.org/cgi-bin/carddisp.pl?gene=DCAF8</a>     |
| UFD1    | JAZF Zinc Finger 1 Alpha-1-Microglobulin/Bikunin Precursor                                    | Protein Coding | 36 | GC22M019450 | 10.82486 | <a href="https://www.genecards.org/cgi-bin/carddisp.pl?gene=UFD1">https://www.genecards.org/cgi-bin/carddisp.pl?gene=UFD1</a>       |
| JAZF1   | Rho Related BTB Domain Containing 2                                                           | Protein Coding | 39 | GC07M027830 | 10.82095 | <a href="https://www.genecards.org/cgi-bin/carddisp.pl?gene=JAZF1">https://www.genecards.org/cgi-bin/carddisp.pl?gene=JAZF1</a>     |
| AMBP    | RAR Related Orphan Receptor A Sodium                                                          | Protein Coding | 43 | GC09M114060 | 10.81432 | <a href="https://www.genecards.org/cgi-bin/carddisp.pl?gene=AMBP">https://www.genecards.org/cgi-bin/carddisp.pl?gene=AMBP</a>       |
| RHOBTB2 | Voltage-Gated Channel Alpha Subunit 11                                                        | Protein Coding | 40 | GC08P022987 | 10.8103  | <a href="https://www.genecards.org/cgi-bin/carddisp.pl?gene=RHOBTB2">https://www.genecards.org/cgi-bin/carddisp.pl?gene=RHOBTB2</a> |
| RORA    | Caudal Type Homeobox 2                                                                        | Protein Coding | 50 | GC15M060488 | 10.801   | <a href="https://www.genecards.org/cgi-bin/carddisp.pl?gene=RORA">https://www.genecards.org/cgi-bin/carddisp.pl?gene=RORA</a>       |
| SCN11A  | TNFAIP3 Interacting Protein 1                                                                 | Protein Coding | 42 | GC03M038862 | 10.80071 | <a href="https://www.genecards.org/cgi-bin/carddisp.pl?gene=SCN11A">https://www.genecards.org/cgi-bin/carddisp.pl?gene=SCN11A</a>   |
| CDX2    | MicroRNA 423                                                                                  | Protein Coding | 44 | GC13M027962 | 10.79582 | <a href="https://www.genecards.org/cgi-bin/carddisp.pl?gene=CDX2">https://www.genecards.org/cgi-bin/carddisp.pl?gene=CDX2</a>       |
| TNIP1   | Lactalbumin Alpha                                                                             | Protein Coding | 42 | GC05M151029 | 10.79447 | <a href="https://www.genecards.org/cgi-bin/carddisp.pl?gene=TNIP1">https://www.genecards.org/cgi-bin/carddisp.pl?gene=TNIP1</a>     |
| MIR423  | MicroRNA 30b                                                                                  | RNA Gene       | 18 | GC17P030117 | 10.79375 | <a href="https://www.genecards.org/cgi-bin/carddisp.pl?gene=MIR423">https://www.genecards.org/cgi-bin/carddisp.pl?gene=MIR423</a>   |
| LALBA   | Prolactin Induced Protein                                                                     | Protein Coding | 40 | GC12M048567 | 10.78378 | <a href="https://www.genecards.org/cgi-bin/carddisp.pl?gene=LALBA">https://www.genecards.org/cgi-bin/carddisp.pl?gene=LALBA</a>     |
| MIR30B  | Pyridoxamine 5'-Phosphate Oxidase                                                             | RNA Gene       | 20 | GC08M134800 | 10.78068 | <a href="https://www.genecards.org/cgi-bin/carddisp.pl?gene=MIR30B">https://www.genecards.org/cgi-bin/carddisp.pl?gene=MIR30B</a>   |
| PIP     | Integrin Subunit Alpha X                                                                      | Protein Coding | 38 | GC07P143132 | 10.77745 | <a href="https://www.genecards.org/cgi-bin/carddisp.pl?gene=PIP">https://www.genecards.org/cgi-bin/carddisp.pl?gene=PIP</a>         |
| PNPO    | Ankyrin 2                                                                                     | Protein Coding | 46 | GC17P047941 | 10.7726  | <a href="https://www.genecards.org/cgi-bin/carddisp.pl?gene=PNPO">https://www.genecards.org/cgi-bin/carddisp.pl?gene=PNPO</a>       |
| ITGAX   | S-Phase Cyclin A Associated Protein In The ER                                                 | Protein Coding | 45 | GC16P032567 | 10.76672 | <a href="https://www.genecards.org/cgi-bin/carddisp.pl?gene=ITGAX">https://www.genecards.org/cgi-bin/carddisp.pl?gene=ITGAX</a>     |
| ANK2    |                                                                                               | Protein Coding | 41 | GC04P112706 | 10.76567 | <a href="https://www.genecards.org/cgi-bin/carddisp.pl?gene=ANK2">https://www.genecards.org/cgi-bin/carddisp.pl?gene=ANK2</a>       |
| SCAPER  |                                                                                               | Protein Coding | 36 | GC15M076347 | 10.7656  | <a href="https://www.genecards.org/cgi-bin/carddisp.pl?gene=SCAPER">https://www.genecards.org/cgi-bin/carddisp.pl?gene=SCAPER</a>   |

|        |                                                            |                |    |             |          |                                                                                                                                   |
|--------|------------------------------------------------------------|----------------|----|-------------|----------|-----------------------------------------------------------------------------------------------------------------------------------|
| DACT1  | Dishevelled Binding Antagonist Of Beta Catenin 1           | Protein Coding | 40 | GC14P058633 | 10.76391 | <a href="https://www.genecards.org/cgi-bin/carddisp.pl?gene=DACT1">https://www.genecards.org/cgi-bin/carddisp.pl?gene=DACT1</a>   |
| PDGFA  | Platelet Derived Growth Factor Subunit A                   | Protein Coding | 44 | GC07M000497 | 10.7553  | <a href="https://www.genecards.org/cgi-bin/carddisp.pl?gene=PDGFA">https://www.genecards.org/cgi-bin/carddisp.pl?gene=PDGFA</a>   |
| MASP2  | MBL Associated Serine Protease 2                           | Protein Coding | 47 | GC01M011026 | 10.75466 | <a href="https://www.genecards.org/cgi-bin/carddisp.pl?gene=MASP2">https://www.genecards.org/cgi-bin/carddisp.pl?gene=MASP2</a>   |
| ELAVL1 | ELAV Like RNA Binding Protein 1                            | Protein Coding | 43 | GC19M007958 | 10.74929 | <a href="https://www.genecards.org/cgi-bin/carddisp.pl?gene=ELAVL1">https://www.genecards.org/cgi-bin/carddisp.pl?gene=ELAVL1</a> |
| PIGR   | Polymeric Immunoglobulin Receptor                          | Protein Coding | 41 | GC01M206928 | 10.74318 | <a href="https://www.genecards.org/cgi-bin/carddisp.pl?gene=PIGR">https://www.genecards.org/cgi-bin/carddisp.pl?gene=PIGR</a>     |
| SLC9A9 | Solute Carrier Family 9 Member A9                          | Protein Coding | 40 | GC03M143265 | 10.74085 | <a href="https://www.genecards.org/cgi-bin/carddisp.pl?gene=SLC9A9">https://www.genecards.org/cgi-bin/carddisp.pl?gene=SLC9A9</a> |
| GRIK3  | Glutamate Ionotropic Receptor Kainate Type Subunit 3       | Protein Coding | 43 | GC01M036795 | 10.73142 | <a href="https://www.genecards.org/cgi-bin/carddisp.pl?gene=GRIK3">https://www.genecards.org/cgi-bin/carddisp.pl?gene=GRIK3</a>   |
| CPB2   | Carboxypeptidase B2                                        | Protein Coding | 45 | GC13M046053 | 10.72004 | <a href="https://www.genecards.org/cgi-bin/carddisp.pl?gene=CPB2">https://www.genecards.org/cgi-bin/carddisp.pl?gene=CPB2</a>     |
| JCAD   | Junctional Cadherin 5 Associated                           | Protein Coding | 26 | GC10M030012 | 10.71963 | <a href="https://www.genecards.org/cgi-bin/carddisp.pl?gene=JCAD">https://www.genecards.org/cgi-bin/carddisp.pl?gene=JCAD</a>     |
| GFPT1  | Glutamine--Fructose-6-Phosphate Transaminase 1             | Protein Coding | 47 | GC02M069283 | 10.71841 | <a href="https://www.genecards.org/cgi-bin/carddisp.pl?gene=GFPT1">https://www.genecards.org/cgi-bin/carddisp.pl?gene=GFPT1</a>   |
| PKD4   | Pyruvate Dehydrogenase Kinase 4                            | Protein Coding | 47 | GC07M095583 | 10.70357 | <a href="https://www.genecards.org/cgi-bin/carddisp.pl?gene=PKD4">https://www.genecards.org/cgi-bin/carddisp.pl?gene=PKD4</a>     |
| ZFAT   | Zinc Finger And AT-Hook Domain Containing                  | Protein Coding | 37 | GC08M134477 | 10.69573 | <a href="https://www.genecards.org/cgi-bin/carddisp.pl?gene=ZFAT">https://www.genecards.org/cgi-bin/carddisp.pl?gene=ZFAT</a>     |
| CLRN1  | Clarín 1                                                   | Protein Coding | 35 | GC03M150926 | 10.69383 | <a href="https://www.genecards.org/cgi-bin/carddisp.pl?gene=CLRN1">https://www.genecards.org/cgi-bin/carddisp.pl?gene=CLRN1</a>   |
| THBS2  | Thrombospondin 2                                           | Protein Coding | 46 | GC06M169215 | 10.6914  | <a href="https://www.genecards.org/cgi-bin/carddisp.pl?gene=THBS2">https://www.genecards.org/cgi-bin/carddisp.pl?gene=THBS2</a>   |
| MBD5   | Methyl-CpG Binding Domain Protein 5                        | Protein Coding | 37 | GC02P148021 | 10.68962 | <a href="https://www.genecards.org/cgi-bin/carddisp.pl?gene=MBD5">https://www.genecards.org/cgi-bin/carddisp.pl?gene=MBD5</a>     |
| STT3B  | STT3 Oligosaccharyltransferase Complex Catalytic Subunit B | Protein Coding | 44 | GC03P031550 | 10.68569 | <a href="https://www.genecards.org/cgi-bin/carddisp.pl?gene=STT3B">https://www.genecards.org/cgi-bin/carddisp.pl?gene=STT3B</a>   |

|        |                                                                  |                |    |             |          |                                                                                                                                   |
|--------|------------------------------------------------------------------|----------------|----|-------------|----------|-----------------------------------------------------------------------------------------------------------------------------------|
| EPX    | Eosinophil Peroxidase                                            | Protein Coding | 44 | GC17P058192 | 10.67831 | <a href="https://www.genecards.org/cgi-bin/carddisp.pl?gene=EPX">https://www.genecards.org/cgi-bin/carddisp.pl?gene=EPX</a>       |
| KCNA2  | Potassium Voltage-Gated Channel Subfamily A Member 2             | Protein Coding | 46 | GC01M110519 | 10.67739 | <a href="https://www.genecards.org/cgi-bin/carddisp.pl?gene=KCNA2">https://www.genecards.org/cgi-bin/carddisp.pl?gene=KCNA2</a>   |
| STX3   | Syntaxin 3                                                       | Protein Coding | 43 | GC11P059713 | 10.6753  | <a href="https://www.genecards.org/cgi-bin/carddisp.pl?gene=STX3">https://www.genecards.org/cgi-bin/carddisp.pl?gene=STX3</a>     |
| RPL11  | Ribosomal Protein L11                                            | Protein Coding | 49 | GC01P023691 | 10.6748  | <a href="https://www.genecards.org/cgi-bin/carddisp.pl?gene=RPL11">https://www.genecards.org/cgi-bin/carddisp.pl?gene=RPL11</a>   |
| MAP1B  | Microtubule Associated Protein 1B                                | Protein Coding | 44 | GC05P072107 | 10.67167 | <a href="https://www.genecards.org/cgi-bin/carddisp.pl?gene=MAP1B">https://www.genecards.org/cgi-bin/carddisp.pl?gene=MAP1B</a>   |
| CERKL  | Ceramide Kinase Like                                             | Protein Coding | 40 | GC02M181536 | 10.66726 | <a href="https://www.genecards.org/cgi-bin/carddisp.pl?gene=CERKL">https://www.genecards.org/cgi-bin/carddisp.pl?gene=CERKL</a>   |
| LPCAT3 | Lysophosphatidylcholine Acyltransferase 3                        | Protein Coding | 36 | GC12M006976 | 10.6657  | <a href="https://www.genecards.org/cgi-bin/carddisp.pl?gene=LPCAT3">https://www.genecards.org/cgi-bin/carddisp.pl?gene=LPCAT3</a> |
| TCOF1  | Treacle Ribosome Biogenesis Factor 1                             | Protein Coding | 43 | GC05P150358 | 10.6608  | <a href="https://www.genecards.org/cgi-bin/carddisp.pl?gene=TCOF1">https://www.genecards.org/cgi-bin/carddisp.pl?gene=TCOF1</a>   |
| ROM1   | Retinal Outer Segment Membrane Protein 1                         | Protein Coding | 44 | GC11P062611 | 10.65982 | <a href="https://www.genecards.org/cgi-bin/carddisp.pl?gene=ROM1">https://www.genecards.org/cgi-bin/carddisp.pl?gene=ROM1</a>     |
| YY1    | YY1 Transcription Factor                                         | Protein Coding | 48 | GC14P100238 | 10.65179 | <a href="https://www.genecards.org/cgi-bin/carddisp.pl?gene=YY1">https://www.genecards.org/cgi-bin/carddisp.pl?gene=YY1</a>       |
| DHRS9  | Dehydrogenase/Reductase 9                                        | Protein Coding | 40 | GC02P169064 | 10.65149 | <a href="https://www.genecards.org/cgi-bin/carddisp.pl?gene=DHRS9">https://www.genecards.org/cgi-bin/carddisp.pl?gene=DHRS9</a>   |
| MSBP1  | Minisatellite Binding Protein 1                                  | Protein Coding | 5  | GC00U990213 | 10.64589 | <a href="https://www.genecards.org/cgi-bin/carddisp.pl?gene=MSBP1">https://www.genecards.org/cgi-bin/carddisp.pl?gene=MSBP1</a>   |
| SORT1  | Sortilin 1                                                       | Protein Coding | 44 | GC01M109310 | 10.64058 | <a href="https://www.genecards.org/cgi-bin/carddisp.pl?gene=SORT1">https://www.genecards.org/cgi-bin/carddisp.pl?gene=SORT1</a>   |
| TRPA1  | Transient Receptor Potential Cation Channel Subfamily A Member 1 | Protein Coding | 46 | GC08M072019 | 10.63908 | <a href="https://www.genecards.org/cgi-bin/carddisp.pl?gene=TRPA1">https://www.genecards.org/cgi-bin/carddisp.pl?gene=TRPA1</a>   |
| RPS19  | Ribosomal Protein S19                                            | Protein Coding | 49 | GC19P041859 | 10.63476 | <a href="https://www.genecards.org/cgi-bin/carddisp.pl?gene=RPS19">https://www.genecards.org/cgi-bin/carddisp.pl?gene=RPS19</a>   |
| HSPB2  | Heat Shock Protein Family B (Small) Member 2                     | Protein Coding | 41 | GC11P111913 | 10.63035 | <a href="https://www.genecards.org/cgi-bin/carddisp.pl?gene=HSPB2">https://www.genecards.org/cgi-bin/carddisp.pl?gene=HSPB2</a>   |
| GLIS3  | GLIS Family Zinc Finger 3                                        | Protein Coding | 40 | GC09M003816 | 10.62803 | <a href="https://www.genecards.org/cgi-bin/carddisp.pl?gene=GLIS3">https://www.genecards.org/cgi-bin/carddisp.pl?gene=GLIS3</a>   |
| ITGA8  | Integrin Subunit Alpha 8                                         | Protein Coding | 43 | GC10M015513 | 10.62797 | <a href="https://www.genecards.org/cgi-bin/carddisp.pl?gene=ITGA8">https://www.genecards.org/cgi-bin/carddisp.pl?gene=ITGA8</a>   |

|          |                                                            |                |    |             |          |                                                                                                                                       |
|----------|------------------------------------------------------------|----------------|----|-------------|----------|---------------------------------------------------------------------------------------------------------------------------------------|
| EIF2B1   | Eukaryotic Translation Initiation Factor 2B Subunit Alpha  | Protein Coding | 44 | GC12M123620 | 10.61639 | <a href="https://www.genecards.org/cgi-bin/carddisp.pl?gene=EIF2B1">https://www.genecards.org/cgi-bin/carddisp.pl?gene=EIF2B1</a>     |
| DISC1    | DISC1 Scaffold Protein                                     | Protein Coding | 44 | GC01P231626 | 10.61204 | <a href="https://www.genecards.org/cgi-bin/carddisp.pl?gene=DISC1">https://www.genecards.org/cgi-bin/carddisp.pl?gene=DISC1</a>       |
| RECQL4   | RecQ Like Helicase 4 Cellular                              | Protein Coding | 43 | GC08M144512 | 10.60959 | <a href="https://www.genecards.org/cgi-bin/carddisp.pl?gene=RECQL4">https://www.genecards.org/cgi-bin/carddisp.pl?gene=RECQL4</a>     |
| CRABP1   | Retinoic Acid Binding Protein 1                            | Protein Coding | 42 | GC15P078340 | 10.60447 | <a href="https://www.genecards.org/cgi-bin/carddisp.pl?gene=CRABP1">https://www.genecards.org/cgi-bin/carddisp.pl?gene=CRABP1</a>     |
| CCND2    | Cyclin D2                                                  | Protein Coding | 50 | GC12P011795 | 10.60138 | <a href="https://www.genecards.org/cgi-bin/carddisp.pl?gene=CCND2">https://www.genecards.org/cgi-bin/carddisp.pl?gene=CCND2</a>       |
| GJA5     | Gap Junction Protein Alpha 5                               | Protein Coding | 46 | GC01M147756 | 10.59994 | <a href="https://www.genecards.org/cgi-bin/carddisp.pl?gene=GJA5">https://www.genecards.org/cgi-bin/carddisp.pl?gene=GJA5</a>         |
| CTBP1    | C-Terminal Binding Protein 1                               | Protein Coding | 48 | GC04M001211 | 10.58987 | <a href="https://www.genecards.org/cgi-bin/carddisp.pl?gene=CTBP1">https://www.genecards.org/cgi-bin/carddisp.pl?gene=CTBP1</a>       |
| PGK1     | Phosphoglycerate Kinase 1                                  | Protein Coding | 49 | GC0XP077944 | 10.58953 | <a href="https://www.genecards.org/cgi-bin/carddisp.pl?gene=PGK1">https://www.genecards.org/cgi-bin/carddisp.pl?gene=PGK1</a>         |
| TCTN3    | Tectonic Family Member 3                                   | Protein Coding | 40 | GC10M095663 | 10.5846  | <a href="https://www.genecards.org/cgi-bin/carddisp.pl?gene=TCTN3">https://www.genecards.org/cgi-bin/carddisp.pl?gene=TCTN3</a>       |
| SLCO1A2  | Solute Carrier Organic Anion Transporter Family Member 1A2 | Protein Coding | 40 | GC12M021264 | 10.58215 | <a href="https://www.genecards.org/cgi-bin/carddisp.pl?gene=SLCO1A2">https://www.genecards.org/cgi-bin/carddisp.pl?gene=SLCO1A2</a>   |
| B3GALNT2 | Beta-1,3-N-Acetylgalactosaminyltransferase 2               | Protein Coding | 41 | GC01M235440 | 10.57964 | <a href="https://www.genecards.org/cgi-bin/carddisp.pl?gene=B3GALNT2">https://www.genecards.org/cgi-bin/carddisp.pl?gene=B3GALNT2</a> |
| SETD5    | SET Domain Containing 5                                    | Protein Coding | 38 | GC03P009402 | 10.57862 | <a href="https://www.genecards.org/cgi-bin/carddisp.pl?gene=SETD5">https://www.genecards.org/cgi-bin/carddisp.pl?gene=SETD5</a>       |
| CD1D     | CD1d Molecule                                              | Protein Coding | 43 | GC01P158178 | 10.577   | <a href="https://www.genecards.org/cgi-bin/carddisp.pl?gene=CD1D">https://www.genecards.org/cgi-bin/carddisp.pl?gene=CD1D</a>         |
| FAR2P1   | Fatty Acyl-CoA Reductase 2 Pseudogene 1                    | Pseudogene     | 13 | GC02M130012 | 10.57271 | <a href="https://www.genecards.org/cgi-bin/carddisp.pl?gene=FAR2P1">https://www.genecards.org/cgi-bin/carddisp.pl?gene=FAR2P1</a>     |
| KRT10    | Keratin 10                                                 | Protein Coding | 43 | GC17M040818 | 10.56855 | <a href="https://www.genecards.org/cgi-bin/carddisp.pl?gene=KRT10">https://www.genecards.org/cgi-bin/carddisp.pl?gene=KRT10</a>       |
| NNMT     | Nicotinamide N-Methyltransferase                           | Protein Coding | 46 | GC11P114257 | 10.56772 | <a href="https://www.genecards.org/cgi-bin/carddisp.pl?gene=NNMT">https://www.genecards.org/cgi-bin/carddisp.pl?gene=NNMT</a>         |
| PLA2G1B  | Phospholipase A2 Group IB                                  | Protein Coding | 47 | GC12M120322 | 10.56747 | <a href="https://www.genecards.org/cgi-bin/carddisp.pl?gene=PLA2G1B">https://www.genecards.org/cgi-bin/carddisp.pl?gene=PLA2G1B</a>   |
| MIR187   | MicroRNA 187                                               | RNA Gene       | 18 | GC18M035904 | 10.56692 | <a href="https://www.genecards.org/cgi-bin/carddisp.pl?gene=MIR187">https://www.genecards.org/cgi-bin/carddisp.pl?gene=MIR187</a>     |
| TRAPPC9  | Trafficking Protein Particle Complex Subunit 9             | Protein Coding | 39 | GC08M139728 | 10.56671 | <a href="https://www.genecards.org/cgi-bin/carddisp.pl?gene=TRAPPC9">https://www.genecards.org/cgi-bin/carddisp.pl?gene=TRAPPC9</a>   |



|         |                                                                               |                |    |             |          |                                                                                                                                     |
|---------|-------------------------------------------------------------------------------|----------------|----|-------------|----------|-------------------------------------------------------------------------------------------------------------------------------------|
| LCT     | Lactase                                                                       | Protein Coding | 43 | GC02M135787 | 10.56483 | <a href="https://www.genecards.org/cgi-bin/carddisp.pl?gene=LCT">https://www.genecards.org/cgi-bin/carddisp.pl?gene=LCT</a>         |
| RASA2   | RAS P21 Protein Activator 2                                                   | Protein Coding | 41 | GC03P141487 | 10.56102 | <a href="https://www.genecards.org/cgi-bin/carddisp.pl?gene=RASA2">https://www.genecards.org/cgi-bin/carddisp.pl?gene=RASA2</a>     |
| SALL1   | Spalt Like Transcription Factor 1                                             | Protein Coding | 45 | GC16M051135 | 10.55348 | <a href="https://www.genecards.org/cgi-bin/carddisp.pl?gene=SALL1">https://www.genecards.org/cgi-bin/carddisp.pl?gene=SALL1</a>     |
| KRT17   | Keratin 17                                                                    | Protein Coding | 47 | GC17M041619 | 10.55346 | <a href="https://www.genecards.org/cgi-bin/carddisp.pl?gene=KRT17">https://www.genecards.org/cgi-bin/carddisp.pl?gene=KRT17</a>     |
| ZBTB20  | Zinc Finger And BTB Domain Containing 20                                      | Protein Coding | 41 | GC03M114315 | 10.54197 | <a href="https://www.genecards.org/cgi-bin/carddisp.pl?gene=ZBTB20">https://www.genecards.org/cgi-bin/carddisp.pl?gene=ZBTB20</a>   |
| OAT     | Ornithine Aminotransferase                                                    | Protein Coding | 48 | GC10M124397 | 10.53657 | <a href="https://www.genecards.org/cgi-bin/carddisp.pl?gene=OAT">https://www.genecards.org/cgi-bin/carddisp.pl?gene=OAT</a>         |
| DEFB4A  | Defensin Beta 4A                                                              | Protein Coding | 37 | GC08P007895 | 10.53605 | <a href="https://www.genecards.org/cgi-bin/carddisp.pl?gene=DEFB4A">https://www.genecards.org/cgi-bin/carddisp.pl?gene=DEFB4A</a>   |
| DIO2    | Iodothyronine Deiodinase 2                                                    | Protein Coding | 41 | GC14M080197 | 10.53469 | <a href="https://www.genecards.org/cgi-bin/carddisp.pl?gene=DIO2">https://www.genecards.org/cgi-bin/carddisp.pl?gene=DIO2</a>       |
| EYA1    | EYA Transcriptional Coactivator And Phosphatase 1 Alpha                       | Protein Coding | 46 | GC08M071210 | 10.53276 | <a href="https://www.genecards.org/cgi-bin/carddisp.pl?gene=EYA1">https://www.genecards.org/cgi-bin/carddisp.pl?gene=EYA1</a>       |
| AHSP    | Hemoglobin Stabilizing Protein                                                | Protein Coding | 36 | GC16P031527 | 10.53246 | <a href="https://www.genecards.org/cgi-bin/carddisp.pl?gene=AHSP">https://www.genecards.org/cgi-bin/carddisp.pl?gene=AHSP</a>       |
| PQBP1   | Polyglutamine Binding Protein 1                                               | Protein Coding | 41 | GC0XP048890 | 10.53089 | <a href="https://www.genecards.org/cgi-bin/carddisp.pl?gene=PQBP1">https://www.genecards.org/cgi-bin/carddisp.pl?gene=PQBP1</a>     |
| PPP1R1B | Protein Phosphatase 1 Regulatory Inhibitor Subunit 1B                         | Protein Coding | 44 | GC17P039626 | 10.52589 | <a href="https://www.genecards.org/cgi-bin/carddisp.pl?gene=PPP1R1B">https://www.genecards.org/cgi-bin/carddisp.pl?gene=PPP1R1B</a> |
| FANCA   | FA Complementation Group A O-Linked N-Acetylglucosamine (GlcNAc) Transferase  | Protein Coding | 49 | GC16M089758 | 10.52587 | <a href="https://www.genecards.org/cgi-bin/carddisp.pl?gene=FANCA">https://www.genecards.org/cgi-bin/carddisp.pl?gene=FANCA</a>     |
| OGT     | Cholinergic Receptor Muscarinic 1                                             | Protein Coding | 45 | GC0XP071534 | 10.52515 | <a href="https://www.genecards.org/cgi-bin/carddisp.pl?gene=OGT">https://www.genecards.org/cgi-bin/carddisp.pl?gene=OGT</a>         |
| CHRM1   | ATPase H <sup>+</sup> /K <sup>+</sup> Transporting Non-Gastric Alpha2 Subunit | Protein Coding | 47 | GC11M069277 | 10.51278 | <a href="https://www.genecards.org/cgi-bin/carddisp.pl?gene=CHRM1">https://www.genecards.org/cgi-bin/carddisp.pl?gene=CHRM1</a>     |
| ATP12A  |                                                                               | Protein Coding | 44 | GC13P024680 | 10.51264 | <a href="https://www.genecards.org/cgi-bin/carddisp.pl?gene=ATP12A">https://www.genecards.org/cgi-bin/carddisp.pl?gene=ATP12A</a>   |

|          |                                                        |                |    |             |          |                                                                                                                                       |
|----------|--------------------------------------------------------|----------------|----|-------------|----------|---------------------------------------------------------------------------------------------------------------------------------------|
| GABRA4   | Gamma-Aminobutyric Acid Type A Receptor Subunit Alpha4 | Protein Coding | 45 | GC04M046836 | 10.51147 | <a href="https://www.genecards.org/cgi-bin/carddisp.pl?gene=GABRA4">https://www.genecards.org/cgi-bin/carddisp.pl?gene=GABRA4</a>     |
| MAP3K1   | Mitogen-Activated Protein Kinase Kinase 1              | Protein Coding | 50 | GC05P056815 | 10.50859 | <a href="https://www.genecards.org/cgi-bin/carddisp.pl?gene=MAP3K1">https://www.genecards.org/cgi-bin/carddisp.pl?gene=MAP3K1</a>     |
| THY1     | Thy-1 Cell Surface Antigen                             | Protein Coding | 43 | GC11M119417 | 10.50677 | <a href="https://www.genecards.org/cgi-bin/carddisp.pl?gene=THY1">https://www.genecards.org/cgi-bin/carddisp.pl?gene=THY1</a>         |
| CYGB     | Cytoglobin                                             | Protein Coding | 39 | GC17M076527 | 10.49993 | <a href="https://www.genecards.org/cgi-bin/carddisp.pl?gene=CYGB">https://www.genecards.org/cgi-bin/carddisp.pl?gene=CYGB</a>         |
| TOP1     | DNA Topoisomerase I                                    | Protein Coding | 49 | GC20P041028 | 10.49678 | <a href="https://www.genecards.org/cgi-bin/carddisp.pl?gene=TOP1">https://www.genecards.org/cgi-bin/carddisp.pl?gene=TOP1</a>         |
| SLC9A1   | Solute Carrier Family 9 Member A1                      | Protein Coding | 51 | GC01M027109 | 10.48584 | <a href="https://www.genecards.org/cgi-bin/carddisp.pl?gene=SLC9A1">https://www.genecards.org/cgi-bin/carddisp.pl?gene=SLC9A1</a>     |
| RSF1     | Remodeling And Spacing Factor 1                        | Protein Coding | 36 | GC11M077659 | 10.48472 | <a href="https://www.genecards.org/cgi-bin/carddisp.pl?gene=RSF1">https://www.genecards.org/cgi-bin/carddisp.pl?gene=RSF1</a>         |
| XPO1     | Exportin 1                                             | Protein Coding | 47 | GC02M061445 | 10.48443 | <a href="https://www.genecards.org/cgi-bin/carddisp.pl?gene=XPO1">https://www.genecards.org/cgi-bin/carddisp.pl?gene=XPO1</a>         |
| SLC39A14 | Solute Carrier Family 39 Member 14                     | Protein Coding | 44 | GC08P022367 | 10.48276 | <a href="https://www.genecards.org/cgi-bin/carddisp.pl?gene=SLC39A14">https://www.genecards.org/cgi-bin/carddisp.pl?gene=SLC39A14</a> |
| C5AR1    | Complement C5a Receptor 1                              | Protein Coding | 44 | GC19P047290 | 10.48059 | <a href="https://www.genecards.org/cgi-bin/carddisp.pl?gene=C5AR1">https://www.genecards.org/cgi-bin/carddisp.pl?gene=C5AR1</a>       |
| PROCR    | Protein C Receptor                                     | Protein Coding | 43 | GC20P035233 | 10.47434 | <a href="https://www.genecards.org/cgi-bin/carddisp.pl?gene=PROCR">https://www.genecards.org/cgi-bin/carddisp.pl?gene=PROCR</a>       |
| GSTA2    | Glutathione S-Transferase Alpha 2                      | Protein Coding | 42 | GC06M052750 | 10.47274 | <a href="https://www.genecards.org/cgi-bin/carddisp.pl?gene=GSTA2">https://www.genecards.org/cgi-bin/carddisp.pl?gene=GSTA2</a>       |
| NPR2     | Natriuretic Peptide Receptor 2                         | Protein Coding | 48 | GC09P035782 | 10.47216 | <a href="https://www.genecards.org/cgi-bin/carddisp.pl?gene=NPR2">https://www.genecards.org/cgi-bin/carddisp.pl?gene=NPR2</a>         |
| ENTPD1   | Ectonucleoside Triphosphate Diphosphohydrolase 1       | Protein Coding | 47 | GC10P095711 | 10.4704  | <a href="https://www.genecards.org/cgi-bin/carddisp.pl?gene=ENTPD1">https://www.genecards.org/cgi-bin/carddisp.pl?gene=ENTPD1</a>     |
| DIABLO   | Diablo IAP-Binding Mitochondrial Protein               | Protein Coding | 48 | GC12M122208 | 10.46952 | <a href="https://www.genecards.org/cgi-bin/carddisp.pl?gene=DIABLO">https://www.genecards.org/cgi-bin/carddisp.pl?gene=DIABLO</a>     |
| ACOT11   | Acyl-CoA Thioesterase 11                               | Protein Coding | 40 | GC01P054542 | 10.46532 | <a href="https://www.genecards.org/cgi-bin/carddisp.pl?gene=ACOT11">https://www.genecards.org/cgi-bin/carddisp.pl?gene=ACOT11</a>     |
| THRB     | Thyroid Hormone Receptor Beta                          | Protein Coding | 51 | GC03M024117 | 10.46254 | <a href="https://www.genecards.org/cgi-bin/carddisp.pl?gene=THRB">https://www.genecards.org/cgi-bin/carddisp.pl?gene=THRB</a>         |
| SEC61B   | SEC61 Translocon Subunit Beta                          | Protein Coding | 38 | GC09P099222 | 10.4441  | <a href="https://www.genecards.org/cgi-bin/carddisp.pl?gene=SEC61B">https://www.genecards.org/cgi-bin/carddisp.pl?gene=SEC61B</a>     |

|          |                                                                 |                |    |             |          |                                                                                                                                       |
|----------|-----------------------------------------------------------------|----------------|----|-------------|----------|---------------------------------------------------------------------------------------------------------------------------------------|
| GNAO1    | G Protein Subunit Alpha O1                                      | Protein Coding | 49 | GC16P056231 | 10.44294 | <a href="https://www.genecards.org/cgi-bin/carddisp.pl?gene=GNAO1">https://www.genecards.org/cgi-bin/carddisp.pl?gene=GNAO1</a>       |
| LPP      | LIM Domain Containing Preferred Translocation Partner In Lipoma | Protein Coding | 44 | GC03P188153 | 10.44177 | <a href="https://www.genecards.org/cgi-bin/carddisp.pl?gene=LPP">https://www.genecards.org/cgi-bin/carddisp.pl?gene=LPP</a>           |
| ACADSB   | Acyl-CoA Dehydrogenase Short/Branched Chain                     | Protein Coding | 47 | GC10P123008 | 10.44067 | <a href="https://www.genecards.org/cgi-bin/carddisp.pl?gene=ACADSB">https://www.genecards.org/cgi-bin/carddisp.pl?gene=ACADSB</a>     |
| SLC9A3R1 | SLC9A3 Regulator 1                                              | Protein Coding | 46 | GC17P074749 | 10.43063 | <a href="https://www.genecards.org/cgi-bin/carddisp.pl?gene=SLC9A3R1">https://www.genecards.org/cgi-bin/carddisp.pl?gene=SLC9A3R1</a> |
| CDH3     | Cadherin 3                                                      | Protein Coding | 48 | GC16P068637 | 10.41786 | <a href="https://www.genecards.org/cgi-bin/carddisp.pl?gene=CDH3">https://www.genecards.org/cgi-bin/carddisp.pl?gene=CDH3</a>         |
| SLC52A1  | Solute Carrier Family 52 Member 1                               | Protein Coding | 38 | GC17M005032 | 10.41418 | <a href="https://www.genecards.org/cgi-bin/carddisp.pl?gene=SLC52A1">https://www.genecards.org/cgi-bin/carddisp.pl?gene=SLC52A1</a>   |
| ACP2     | Acid Phosphatase 2, Lysosomal                                   | Protein Coding | 43 | GC11M068994 | 10.41345 | <a href="https://www.genecards.org/cgi-bin/carddisp.pl?gene=ACP2">https://www.genecards.org/cgi-bin/carddisp.pl?gene=ACP2</a>         |
| ARSH     | Arylsulfatase Family Member H                                   | Protein Coding | 34 | GC0XP003006 | 10.41248 | <a href="https://www.genecards.org/cgi-bin/carddisp.pl?gene=ARSH">https://www.genecards.org/cgi-bin/carddisp.pl?gene=ARSH</a>         |
| NTF4     | Neurotrophin 4                                                  | Protein Coding | 44 | GC19M049098 | 10.41016 | <a href="https://www.genecards.org/cgi-bin/carddisp.pl?gene=NTF4">https://www.genecards.org/cgi-bin/carddisp.pl?gene=NTF4</a>         |
| GGCX     | Gamma-Glutamyl Carboxylase                                      | Protein Coding | 47 | GC02M085544 | 10.40775 | <a href="https://www.genecards.org/cgi-bin/carddisp.pl?gene=GGCX">https://www.genecards.org/cgi-bin/carddisp.pl?gene=GGCX</a>         |
| ECM1     | Extracellular Matrix Protein 1                                  | Protein Coding | 44 | GC01P150508 | 10.40176 | <a href="https://www.genecards.org/cgi-bin/carddisp.pl?gene=ECM1">https://www.genecards.org/cgi-bin/carddisp.pl?gene=ECM1</a>         |
| SLC52A2  | Solute Carrier Family 52 Member 2                               | Protein Coding | 38 | GC08P144333 | 10.39993 | <a href="https://www.genecards.org/cgi-bin/carddisp.pl?gene=SLC52A2">https://www.genecards.org/cgi-bin/carddisp.pl?gene=SLC52A2</a>   |
| SOS2     | SOS Ras/Rho Guanine Nucleotide Exchange Factor 2                | Protein Coding | 46 | GC14M050117 | 10.39744 | <a href="https://www.genecards.org/cgi-bin/carddisp.pl?gene=SOS2">https://www.genecards.org/cgi-bin/carddisp.pl?gene=SOS2</a>         |
| GOSR2    | Golgi SNAP Receptor Complex Member 2                            | Protein Coding | 44 | GC17P046924 | 10.38933 | <a href="https://www.genecards.org/cgi-bin/carddisp.pl?gene=GOSR2">https://www.genecards.org/cgi-bin/carddisp.pl?gene=GOSR2</a>       |
| PLD1     | Phospholipase D1                                                | Protein Coding | 49 | GC03M171600 | 10.37018 | <a href="https://www.genecards.org/cgi-bin/carddisp.pl?gene=PLD1">https://www.genecards.org/cgi-bin/carddisp.pl?gene=PLD1</a>         |
| ADORA1   | Adenosine A1 Receptor                                           | Protein Coding | 48 | GC01P203090 | 10.36107 | <a href="https://www.genecards.org/cgi-bin/carddisp.pl?gene=ADORA1">https://www.genecards.org/cgi-bin/carddisp.pl?gene=ADORA1</a>     |

|          |                                                                                      |                |    |             |          |                                                                                                                                       |
|----------|--------------------------------------------------------------------------------------|----------------|----|-------------|----------|---------------------------------------------------------------------------------------------------------------------------------------|
| ABO      | ABO, Alpha 1-3-N-Acetylgalactosaminyltransferase And Alpha 1-3-Galactosyltransferase | Protein Coding | 38 | GC09M133250 | 10.35333 | <a href="https://www.genecards.org/cgi-bin/carddisp.pl?gene=ABO">https://www.genecards.org/cgi-bin/carddisp.pl?gene=ABO</a>           |
| CTSL     | Cathepsin L                                                                          | Protein Coding | 46 | GC09P087725 | 10.35112 | <a href="https://www.genecards.org/cgi-bin/carddisp.pl?gene=CTSL">https://www.genecards.org/cgi-bin/carddisp.pl?gene=CTSL</a>         |
| PPP1CB   | Protein Phosphatase 1 Catalytic Subunit Beta                                         | Protein Coding | 47 | GC02P028752 | 10.34946 | <a href="https://www.genecards.org/cgi-bin/carddisp.pl?gene=PPP1CB">https://www.genecards.org/cgi-bin/carddisp.pl?gene=PPP1CB</a>     |
| CFL1     | Cofilin 1                                                                            | Protein Coding | 47 | GC11M065823 | 10.33877 | <a href="https://www.genecards.org/cgi-bin/carddisp.pl?gene=CFL1">https://www.genecards.org/cgi-bin/carddisp.pl?gene=CFL1</a>         |
| COX4I2   | Cytochrome C Oxidase Subunit 4I2 Dishevelled                                         | Protein Coding | 43 | GC20P031637 | 10.33445 | <a href="https://www.genecards.org/cgi-bin/carddisp.pl?gene=COX4I2">https://www.genecards.org/cgi-bin/carddisp.pl?gene=COX4I2</a>     |
| DVL3     | Segment Polarity Protein 3                                                           | Protein Coding | 47 | GC03P184155 | 10.32727 | <a href="https://www.genecards.org/cgi-bin/carddisp.pl?gene=DVL3">https://www.genecards.org/cgi-bin/carddisp.pl?gene=DVL3</a>         |
| MAVS     | Mitochondrial Antiviral Signaling Protein                                            | Protein Coding | 41 | GC20P003850 | 10.31971 | <a href="https://www.genecards.org/cgi-bin/carddisp.pl?gene=MAVS">https://www.genecards.org/cgi-bin/carddisp.pl?gene=MAVS</a>         |
| FKBP5    | FKBP Prolyl Isomerase 5                                                              | Protein Coding | 47 | GC06M047025 | 10.31944 | <a href="https://www.genecards.org/cgi-bin/carddisp.pl?gene=FKBP5">https://www.genecards.org/cgi-bin/carddisp.pl?gene=FKBP5</a>       |
| AGRN     | Agrin                                                                                | Protein Coding | 45 | GC01P001020 | 10.31876 | <a href="https://www.genecards.org/cgi-bin/carddisp.pl?gene=AGRN">https://www.genecards.org/cgi-bin/carddisp.pl?gene=AGRN</a>         |
| NFIB     | Nuclear Factor I B                                                                   | Protein Coding | 44 | GC09M014077 | 10.31113 | <a href="https://www.genecards.org/cgi-bin/carddisp.pl?gene=NFIB">https://www.genecards.org/cgi-bin/carddisp.pl?gene=NFIB</a>         |
| ITPKC    | Inositol-Trisphosphate 3-Kinase C                                                    | Protein Coding | 44 | GC19P041025 | 10.30676 | <a href="https://www.genecards.org/cgi-bin/carddisp.pl?gene=ITPKC">https://www.genecards.org/cgi-bin/carddisp.pl?gene=ITPKC</a>       |
| BLZF1    | Basic Leucine Zipper Nuclear Factor 1                                                | Protein Coding | 40 | GC01P169367 | 10.30349 | <a href="https://www.genecards.org/cgi-bin/carddisp.pl?gene=BLZF1">https://www.genecards.org/cgi-bin/carddisp.pl?gene=BLZF1</a>       |
| KCNK4    | Potassium Two Pore Domain Channel Subfamily K Member 4                               | Protein Coding | 42 | GC11P064292 | 10.30004 | <a href="https://www.genecards.org/cgi-bin/carddisp.pl?gene=KCNK4">https://www.genecards.org/cgi-bin/carddisp.pl?gene=KCNK4</a>       |
| FOXA1    | Forkhead Box A1                                                                      | Protein Coding | 43 | GC14M037589 | 10.29737 | <a href="https://www.genecards.org/cgi-bin/carddisp.pl?gene=FOXA1">https://www.genecards.org/cgi-bin/carddisp.pl?gene=FOXA1</a>       |
| IRF2BP2  | Interferon Regulatory Factor 2 Binding Protein 2                                     | Protein Coding | 36 | GC01M234604 | 10.2962  | <a href="https://www.genecards.org/cgi-bin/carddisp.pl?gene=IRF2BP2">https://www.genecards.org/cgi-bin/carddisp.pl?gene=IRF2BP2</a>   |
| HSD17B13 | Hydroxysteroid 17-Beta Dehydrogenase 13                                              | Protein Coding | 37 | GC04M087303 | 10.29436 | <a href="https://www.genecards.org/cgi-bin/carddisp.pl?gene=HSD17B13">https://www.genecards.org/cgi-bin/carddisp.pl?gene=HSD17B13</a> |
| HDAC3    | Histone Deacetylase 3                                                                | Protein Coding | 50 | GC05M141583 | 10.29344 | <a href="https://www.genecards.org/cgi-bin/carddisp.pl?gene=HDAC3">https://www.genecards.org/cgi-bin/carddisp.pl?gene=HDAC3</a>       |

|         |                                                            |                |    |             |          |                                                                                                                                     |
|---------|------------------------------------------------------------|----------------|----|-------------|----------|-------------------------------------------------------------------------------------------------------------------------------------|
| VPS33A  | VPS33A Core Subunit Of CORVET And HOPS Complexes           | Protein Coding | 41 | GC12M122229 | 10.28881 | <a href="https://www.genecards.org/cgi-bin/carddisp.pl?gene=VPS33A">https://www.genecards.org/cgi-bin/carddisp.pl?gene=VPS33A</a>   |
| DLST    | Dihydrolipoamide S-Succinyltransferase                     | Protein Coding | 47 | GC14P074881 | 10.28112 | <a href="https://www.genecards.org/cgi-bin/carddisp.pl?gene=DLST">https://www.genecards.org/cgi-bin/carddisp.pl?gene=DLST</a>       |
| ATR     | ATR Serine/Threonine Kinase                                | Protein Coding | 52 | GC03M142449 | 10.27822 | <a href="https://www.genecards.org/cgi-bin/carddisp.pl?gene=ATR">https://www.genecards.org/cgi-bin/carddisp.pl?gene=ATR</a>         |
| GJB6    | Gap Junction Protein Beta 6 Abhydrolase                    | Protein Coding | 45 | GC13M020221 | 10.27575 | <a href="https://www.genecards.org/cgi-bin/carddisp.pl?gene=GJB6">https://www.genecards.org/cgi-bin/carddisp.pl?gene=GJB6</a>       |
| ABHD12  | Domain Containing 12, Lysophospholipase                    | Protein Coding | 41 | GC20M025294 | 10.27471 | <a href="https://www.genecards.org/cgi-bin/carddisp.pl?gene=ABHD12">https://www.genecards.org/cgi-bin/carddisp.pl?gene=ABHD12</a>   |
| PCBD1   | Pterin-4 Alpha-Carbinolamine Dehydratase 1 Protein Kinase, | Protein Coding | 46 | GC10M070882 | 10.2719  | <a href="https://www.genecards.org/cgi-bin/carddisp.pl?gene=PCBD1">https://www.genecards.org/cgi-bin/carddisp.pl?gene=PCBD1</a>     |
| PRKDC   | DNA-Activated, Catalytic Subunit                           | Protein Coding | 50 | GC08M047773 | 10.27054 | <a href="https://www.genecards.org/cgi-bin/carddisp.pl?gene=PRKDC">https://www.genecards.org/cgi-bin/carddisp.pl?gene=PRKDC</a>     |
| COL14A1 | Collagen Type XIV Alpha 1 Chain Cellular                   | Protein Coding | 43 | GC08P120070 | 10.26869 | <a href="https://www.genecards.org/cgi-bin/carddisp.pl?gene=COL14A1">https://www.genecards.org/cgi-bin/carddisp.pl?gene=COL14A1</a> |
| CRABP2  | Retinoic Acid Binding Protein 2                            | Protein Coding | 44 | GC01M156701 | 10.26667 | <a href="https://www.genecards.org/cgi-bin/carddisp.pl?gene=CRABP2">https://www.genecards.org/cgi-bin/carddisp.pl?gene=CRABP2</a>   |
| EVC     | EvC Ciliary Complex Subunit 1                              | Protein Coding | 38 | GC04P005712 | 10.26524 | <a href="https://www.genecards.org/cgi-bin/carddisp.pl?gene=EVC">https://www.genecards.org/cgi-bin/carddisp.pl?gene=EVC</a>         |
| MIR186  | MicroRNA 186                                               | RNA Gene       | 18 | GC01M071067 | 10.26039 | <a href="https://www.genecards.org/cgi-bin/carddisp.pl?gene=MIR186">https://www.genecards.org/cgi-bin/carddisp.pl?gene=MIR186</a>   |
| CTNNA3  | Catenin Alpha 3                                            | Protein Coding | 40 | GC10M065912 | 10.25986 | <a href="https://www.genecards.org/cgi-bin/carddisp.pl?gene=CTNNA3">https://www.genecards.org/cgi-bin/carddisp.pl?gene=CTNNA3</a>   |
| ANK1    | Ankyrin 1                                                  | Protein Coding | 43 | GC08M041653 | 10.25131 | <a href="https://www.genecards.org/cgi-bin/carddisp.pl?gene=ANK1">https://www.genecards.org/cgi-bin/carddisp.pl?gene=ANK1</a>       |
| LGALS4  | Galectin 4                                                 | Protein Coding | 38 | GC19M046731 | 10.24517 | <a href="https://www.genecards.org/cgi-bin/carddisp.pl?gene=LGALS4">https://www.genecards.org/cgi-bin/carddisp.pl?gene=LGALS4</a>   |
| XRCC6   | X-Ray Repair Cross Complementing 6                         | Protein Coding | 47 | GC22P041622 | 10.2426  | <a href="https://www.genecards.org/cgi-bin/carddisp.pl?gene=XRCC6">https://www.genecards.org/cgi-bin/carddisp.pl?gene=XRCC6</a>     |
| NOX1    | NADPH Oxidase 1                                            | Protein Coding | 42 | GC0XM100843 | 10.22913 | <a href="https://www.genecards.org/cgi-bin/carddisp.pl?gene=NOX1">https://www.genecards.org/cgi-bin/carddisp.pl?gene=NOX1</a>       |
| DAXX    | Death Domain Associated Protein                            | Protein Coding | 44 | GC06M033318 | 10.2246  | <a href="https://www.genecards.org/cgi-bin/carddisp.pl?gene=DAXX">https://www.genecards.org/cgi-bin/carddisp.pl?gene=DAXX</a>       |

|          |                                                                  |                |    |             |          |                                                                                                                                       |
|----------|------------------------------------------------------------------|----------------|----|-------------|----------|---------------------------------------------------------------------------------------------------------------------------------------|
| PGAP3    | Post-GPI Attachment To Proteins Phospholipase 3                  | Protein Coding | 38 | GC17M039676 | 10.21666 | <a href="https://www.genecards.org/cgi-bin/carddisp.pl?gene=PGAP3">https://www.genecards.org/cgi-bin/carddisp.pl?gene=PGAP3</a>       |
| CCNE1    | Cyclin E1                                                        | Protein Coding | 49 | GC19P029811 | 10.21604 | <a href="https://www.genecards.org/cgi-bin/carddisp.pl?gene=CCNE1">https://www.genecards.org/cgi-bin/carddisp.pl?gene=CCNE1</a>       |
| WWTR1    | WW Domain Containing Transcription Regulator 1                   | Protein Coding | 43 | GC03M149517 | 10.20921 | <a href="https://www.genecards.org/cgi-bin/carddisp.pl?gene=WWTR1">https://www.genecards.org/cgi-bin/carddisp.pl?gene=WWTR1</a>       |
| ATP4A    | ATPase H <sup>+</sup> /K <sup>+</sup> Transporting Subunit Alpha | Protein Coding | 42 | GC19M047080 | 10.2085  | <a href="https://www.genecards.org/cgi-bin/carddisp.pl?gene=ATP4A">https://www.genecards.org/cgi-bin/carddisp.pl?gene=ATP4A</a>       |
| MIR130B  | MicroRNA 130b                                                    | RNA Gene       | 17 | GC22P027021 | 10.19444 | <a href="https://www.genecards.org/cgi-bin/carddisp.pl?gene=MIR130B">https://www.genecards.org/cgi-bin/carddisp.pl?gene=MIR130B</a>   |
| GRIK2    | Glutamate Ionotropic Receptor Kainate Type Subunit 2             | Protein Coding | 48 | GC06P101181 | 10.18756 | <a href="https://www.genecards.org/cgi-bin/carddisp.pl?gene=GRIK2">https://www.genecards.org/cgi-bin/carddisp.pl?gene=GRIK2</a>       |
| LPO      | Lactoperoxidase                                                  | Protein Coding | 39 | GC17P058218 | 10.18184 | <a href="https://www.genecards.org/cgi-bin/carddisp.pl?gene=LPO">https://www.genecards.org/cgi-bin/carddisp.pl?gene=LPO</a>           |
| PTGIS    | Prostaglandin I2 Synthase                                        | Protein Coding | 48 | GC20M049503 | 10.17269 | <a href="https://www.genecards.org/cgi-bin/carddisp.pl?gene=PTGIS">https://www.genecards.org/cgi-bin/carddisp.pl?gene=PTGIS</a>       |
| PORCN    | Porcupine O-Acyltransferase                                      | Protein Coding | 41 | GC0XP048514 | 10.16844 | <a href="https://www.genecards.org/cgi-bin/carddisp.pl?gene=PORCN">https://www.genecards.org/cgi-bin/carddisp.pl?gene=PORCN</a>       |
| CD82     | CD82 Molecule                                                    | Protein Coding | 43 | GC11P044586 | 10.16836 | <a href="https://www.genecards.org/cgi-bin/carddisp.pl?gene=CD82">https://www.genecards.org/cgi-bin/carddisp.pl?gene=CD82</a>         |
| SPG21    | SPG21 Abhydrolase Domain Containing, Maspardin                   | Protein Coding | 40 | GC15M064963 | 10.1648  | <a href="https://www.genecards.org/cgi-bin/carddisp.pl?gene=SPG21">https://www.genecards.org/cgi-bin/carddisp.pl?gene=SPG21</a>       |
| IL18RAP  | Interleukin 18 Receptor Accessory Protein                        | Protein Coding | 39 | GC02P102418 | 10.16384 | <a href="https://www.genecards.org/cgi-bin/carddisp.pl?gene=IL18RAP">https://www.genecards.org/cgi-bin/carddisp.pl?gene=IL18RAP</a>   |
| COLGALT1 | Collagen Beta(1-O)Galactosyltransferase 1                        | Protein Coding | 37 | GC19P017555 | 10.16361 | <a href="https://www.genecards.org/cgi-bin/carddisp.pl?gene=COLGALT1">https://www.genecards.org/cgi-bin/carddisp.pl?gene=COLGALT1</a> |
| TMPO     | Thymopoietin                                                     | Protein Coding | 45 | GC12P098515 | 10.15447 | <a href="https://www.genecards.org/cgi-bin/carddisp.pl?gene=TMPO">https://www.genecards.org/cgi-bin/carddisp.pl?gene=TMPO</a>         |
| CAST     | Calpastatin                                                      | Protein Coding | 46 | GC05P096525 | 10.15332 | <a href="https://www.genecards.org/cgi-bin/carddisp.pl?gene=CAST">https://www.genecards.org/cgi-bin/carddisp.pl?gene=CAST</a>         |
| AIF1     | Allograft Inflammatory Factor 1                                  | Protein Coding | 40 | GC06P055201 | 10.15277 | <a href="https://www.genecards.org/cgi-bin/carddisp.pl?gene=AIF1">https://www.genecards.org/cgi-bin/carddisp.pl?gene=AIF1</a>         |
| KCNC3    | Potassium Voltage-Gated Channel Subfamily C Member 3             | Protein Coding | 44 | GC19M050322 | 10.15228 | <a href="https://www.genecards.org/cgi-bin/carddisp.pl?gene=KCNC3">https://www.genecards.org/cgi-bin/carddisp.pl?gene=KCNC3</a>       |

|         |                                                                              |                   |    |             |          |                                                                                                                                     |
|---------|------------------------------------------------------------------------------|-------------------|----|-------------|----------|-------------------------------------------------------------------------------------------------------------------------------------|
| NAA10   | N-Alpha-Acetyltransferase 10, NatA Catalytic Subunit                         | Protein Coding    | 43 | GC0XM153929 | 10.14086 | <a href="https://www.genecards.org/cgi-bin/carddisp.pl?gene=NAA10">https://www.genecards.org/cgi-bin/carddisp.pl?gene=NAA10</a>     |
| SOX2-OT | SOX2 Overlapping Transcript                                                  | RNA Gene          | 22 | GC03P180989 | 10.12576 | <a href="https://www.genecards.org/cgi-bin/carddisp.pl?gene=SOX2-OT">https://www.genecards.org/cgi-bin/carddisp.pl?gene=SOX2-OT</a> |
| SLC9A6  | Solute Carrier Family 9 Member A6                                            | Protein Coding    | 47 | GC0XP135985 | 10.12346 | <a href="https://www.genecards.org/cgi-bin/carddisp.pl?gene=SLC9A6">https://www.genecards.org/cgi-bin/carddisp.pl?gene=SLC9A6</a>   |
| HBB-LCR | Beta-Globin Locus Control Region                                             | Biological Region | 5  | GC11P005270 | 10.12127 | <a href="https://www.genecards.org/cgi-bin/carddisp.pl?gene=HBB-LCR">https://www.genecards.org/cgi-bin/carddisp.pl?gene=HBB-LCR</a> |
| KCND3   | Potassium Voltage-Gated Channel Subfamily D Member 3                         | Protein Coding    | 47 | GC01M111770 | 10.12    | <a href="https://www.genecards.org/cgi-bin/carddisp.pl?gene=KCND3">https://www.genecards.org/cgi-bin/carddisp.pl?gene=KCND3</a>     |
| IVL     | Involucrin                                                                   | Protein Coding    | 38 | GC01P152881 | 10.11668 | <a href="https://www.genecards.org/cgi-bin/carddisp.pl?gene=IVL">https://www.genecards.org/cgi-bin/carddisp.pl?gene=IVL</a>         |
| CNBP    | CCHC-Type Zinc Finger Nucleic Acid Binding Protein                           | Protein Coding    | 43 | GC03M129167 | 10.11429 | <a href="https://www.genecards.org/cgi-bin/carddisp.pl?gene=CNBP">https://www.genecards.org/cgi-bin/carddisp.pl?gene=CNBP</a>       |
| XPC     | XPC Complex Subunit, DNA Damage Recognition And Repair Factor                | Protein Coding    | 46 | GC03M016919 | 10.10494 | <a href="https://www.genecards.org/cgi-bin/carddisp.pl?gene=XPC">https://www.genecards.org/cgi-bin/carddisp.pl?gene=XPC</a>         |
| POLR2A  | RNA Polymerase II Subunit A                                                  | Protein Coding    | 45 | GC17P009102 | 10.10481 | <a href="https://www.genecards.org/cgi-bin/carddisp.pl?gene=POLR2A">https://www.genecards.org/cgi-bin/carddisp.pl?gene=POLR2A</a>   |
| ITGB4   | Integrin Subunit Beta 4                                                      | Protein Coding    | 49 | GC17P075721 | 10.10428 | <a href="https://www.genecards.org/cgi-bin/carddisp.pl?gene=ITGB4">https://www.genecards.org/cgi-bin/carddisp.pl?gene=ITGB4</a>     |
| KCNJ6   | Potassium Inwardly Rectifying Channel Subfamily J Member 6                   | Protein Coding    | 48 | GC21M037607 | 10.10393 | <a href="https://www.genecards.org/cgi-bin/carddisp.pl?gene=KCNJ6">https://www.genecards.org/cgi-bin/carddisp.pl?gene=KCNJ6</a>     |
| HRG     | Histidine Rich Glycoprotein                                                  | Protein Coding    | 43 | GC03P186660 | 10.10212 | <a href="https://www.genecards.org/cgi-bin/carddisp.pl?gene=HRG">https://www.genecards.org/cgi-bin/carddisp.pl?gene=HRG</a>         |
| YWHAQ   | Tyrosine 3-Monooxygenase/Tryptophan 5-Monooxygenase Activation Protein Theta | Protein Coding    | 48 | GC02M009583 | 10.0923  | <a href="https://www.genecards.org/cgi-bin/carddisp.pl?gene=YWHAQ">https://www.genecards.org/cgi-bin/carddisp.pl?gene=YWHAQ</a>     |
| ASPM    | Assembly Factor For Spindle Microtubules                                     | Protein Coding    | 39 | GC01M197084 | 10.0893  | <a href="https://www.genecards.org/cgi-bin/carddisp.pl?gene=ASPM">https://www.genecards.org/cgi-bin/carddisp.pl?gene=ASPM</a>       |

|          |                                               |                |    |             |          |                                                                                                                                       |
|----------|-----------------------------------------------|----------------|----|-------------|----------|---------------------------------------------------------------------------------------------------------------------------------------|
| SLC25A12 | Solute Carrier Family 25 Member 12            | Protein Coding | 47 | GC02M171783 | 10.08722 | <a href="https://www.genecards.org/cgi-bin/carddisp.pl?gene=SLC25A12">https://www.genecards.org/cgi-bin/carddisp.pl?gene=SLC25A12</a> |
| TARS1    | Threonyl-TRNA Synthetase 1                    | Protein Coding | 37 | GC05P033441 | 10.08653 | <a href="https://www.genecards.org/cgi-bin/carddisp.pl?gene=TARS1">https://www.genecards.org/cgi-bin/carddisp.pl?gene=TARS1</a>       |
| PREPL    | Prolyl Endopeptidase Like                     | Protein Coding | 42 | GC02M044281 | 10.08015 | <a href="https://www.genecards.org/cgi-bin/carddisp.pl?gene=PREPL">https://www.genecards.org/cgi-bin/carddisp.pl?gene=PREPL</a>       |
| MYOG     | Myogenin                                      | Protein Coding | 40 | GC01M203083 | 10.07588 | <a href="https://www.genecards.org/cgi-bin/carddisp.pl?gene=MYOG">https://www.genecards.org/cgi-bin/carddisp.pl?gene=MYOG</a>         |
| LAMC2    | Laminin Subunit Gamma 2                       | Protein Coding | 47 | GC01P183186 | 10.0587  | <a href="https://www.genecards.org/cgi-bin/carddisp.pl?gene=LAMC2">https://www.genecards.org/cgi-bin/carddisp.pl?gene=LAMC2</a>       |
| AXL      | AXL Receptor Tyrosine Kinase                  | Protein Coding | 52 | GC19P041219 | 10.05224 | <a href="https://www.genecards.org/cgi-bin/carddisp.pl?gene=AXL">https://www.genecards.org/cgi-bin/carddisp.pl?gene=AXL</a>           |
| MAP2K4   | Mitogen-Activated Protein Kinase Kinase 4     | Protein Coding | 47 | GC17P012020 | 10.04863 | <a href="https://www.genecards.org/cgi-bin/carddisp.pl?gene=MAP2K4">https://www.genecards.org/cgi-bin/carddisp.pl?gene=MAP2K4</a>     |
| CASQ1    | Calsequestrin 1                               | Protein Coding | 44 | GC01P160190 | 10.04662 | <a href="https://www.genecards.org/cgi-bin/carddisp.pl?gene=CASQ1">https://www.genecards.org/cgi-bin/carddisp.pl?gene=CASQ1</a>       |
| RAB7B    | RAB7B, Member RAS Oncogene Family             | Protein Coding | 32 | GC01M205976 | 10.04332 | <a href="https://www.genecards.org/cgi-bin/carddisp.pl?gene=RAB7B">https://www.genecards.org/cgi-bin/carddisp.pl?gene=RAB7B</a>       |
| NOG      | Noggin                                        | Protein Coding | 47 | GC17P056593 | 10.04042 | <a href="https://www.genecards.org/cgi-bin/carddisp.pl?gene=NOG">https://www.genecards.org/cgi-bin/carddisp.pl?gene=NOG</a>           |
| ACO2     | Aconitase 2                                   | Protein Coding | 48 | GC22P041448 | 10.034   | <a href="https://www.genecards.org/cgi-bin/carddisp.pl?gene=ACO2">https://www.genecards.org/cgi-bin/carddisp.pl?gene=ACO2</a>         |
| NES      | Nestin                                        | Protein Coding | 40 | GC01M156668 | 10.02803 | <a href="https://www.genecards.org/cgi-bin/carddisp.pl?gene=NES">https://www.genecards.org/cgi-bin/carddisp.pl?gene=NES</a>           |
| CYP4B1   | Cytochrome P450 Family 4 Subfamily B Member 1 | Protein Coding | 44 | GC01P046757 | 10.02289 | <a href="https://www.genecards.org/cgi-bin/carddisp.pl?gene=CYP4B1">https://www.genecards.org/cgi-bin/carddisp.pl?gene=CYP4B1</a>     |
| SRD5A1   | Steroid 5 Alpha-Reductase 1                   | Protein Coding | 45 | GC05P006633 | 10.01725 | <a href="https://www.genecards.org/cgi-bin/carddisp.pl?gene=SRD5A1">https://www.genecards.org/cgi-bin/carddisp.pl?gene=SRD5A1</a>     |
| ADPRH    | ADP-Ribosylarginine Hydrolase                 | Protein Coding | 37 | GC03P119579 | 10.0169  | <a href="https://www.genecards.org/cgi-bin/carddisp.pl?gene=ADPRH">https://www.genecards.org/cgi-bin/carddisp.pl?gene=ADPRH</a>       |
| CDH5     | Cadherin 5                                    | Protein Coding | 48 | GC16P066366 | 10.00973 | <a href="https://www.genecards.org/cgi-bin/carddisp.pl?gene=CDH5">https://www.genecards.org/cgi-bin/carddisp.pl?gene=CDH5</a>         |
| GP9      | Glycoprotein IX Platelet                      | Protein Coding | 47 | GC03P131453 | 10.00558 | <a href="https://www.genecards.org/cgi-bin/carddisp.pl?gene=GP9">https://www.genecards.org/cgi-bin/carddisp.pl?gene=GP9</a>           |
| VAR51    | Valyl-TRNA Synthetase 1                       | Protein Coding | 37 | GC06M046896 | 10.00223 | <a href="https://www.genecards.org/cgi-bin/carddisp.pl?gene=VAR51">https://www.genecards.org/cgi-bin/carddisp.pl?gene=VAR51</a>       |
| EEA1     | Early Endosome Antigen 1                      | Protein Coding | 44 | GC12M092770 | 9.99829  | <a href="https://www.genecards.org/cgi-bin/carddisp.pl?gene=EEA1">https://www.genecards.org/cgi-bin/carddisp.pl?gene=EEA1</a>         |
| HIP1     | Huntingtin Interacting Protein 1              | Protein Coding | 43 | GC07M075533 | 9.997711 | <a href="https://www.genecards.org/cgi-bin/carddisp.pl?gene=HIP1">https://www.genecards.org/cgi-bin/carddisp.pl?gene=HIP1</a>         |
| GJB4     | Gap Junction Protein Beta 4                   | Protein Coding | 41 | GC01P034759 | 9.995314 | <a href="https://www.genecards.org/cgi-bin/carddisp.pl?gene=GJB4">https://www.genecards.org/cgi-bin/carddisp.pl?gene=GJB4</a>         |



|         |                                              |                |    |             |          |                                                                                                                                     |
|---------|----------------------------------------------|----------------|----|-------------|----------|-------------------------------------------------------------------------------------------------------------------------------------|
| VARS2   | Valyl-TRNA Synthetase 2, Mitochondrial       | Protein Coding | 43 | GC06P055186 | 9.991434 | <a href="https://www.genecards.org/cgi-bin/carddisp.pl?gene=VARS2">https://www.genecards.org/cgi-bin/carddisp.pl?gene=VARS2</a>     |
| WNT8B   | Wnt Family Member 8B                         | Protein Coding | 42 | GC10P100463 | 9.984997 | <a href="https://www.genecards.org/cgi-bin/carddisp.pl?gene=WNT8B">https://www.genecards.org/cgi-bin/carddisp.pl?gene=WNT8B</a>     |
| SGCD    | Sarcoglycan Delta                            | Protein Coding | 46 | GC05P155686 | 9.983204 | <a href="https://www.genecards.org/cgi-bin/carddisp.pl?gene=SGCD">https://www.genecards.org/cgi-bin/carddisp.pl?gene=SGCD</a>       |
| EPHB2   | EPH Receptor B2                              | Protein Coding | 52 | GC01P022710 | 9.982726 | <a href="https://www.genecards.org/cgi-bin/carddisp.pl?gene=EPHB2">https://www.genecards.org/cgi-bin/carddisp.pl?gene=EPHB2</a>     |
| CYLD    | CYLD Lysine 63 Deubiquitinase                | Protein Coding | 50 | GC16P050742 | 9.977121 | <a href="https://www.genecards.org/cgi-bin/carddisp.pl?gene=CYLD">https://www.genecards.org/cgi-bin/carddisp.pl?gene=CYLD</a>       |
| RNASEL  | Ribonuclease L                               | Protein Coding | 45 | GC01M182542 | 9.974077 | <a href="https://www.genecards.org/cgi-bin/carddisp.pl?gene=RNASEL">https://www.genecards.org/cgi-bin/carddisp.pl?gene=RNASEL</a>   |
| TBX4    | T-Box Transcription Factor 4                 | Protein Coding | 42 | GC17P061451 | 9.961285 | <a href="https://www.genecards.org/cgi-bin/carddisp.pl?gene=TBX4">https://www.genecards.org/cgi-bin/carddisp.pl?gene=TBX4</a>       |
| S100A12 | S100 Calcium Binding Protein A12             | Protein Coding | 40 | GC01M153373 | 9.958586 | <a href="https://www.genecards.org/cgi-bin/carddisp.pl?gene=S100A12">https://www.genecards.org/cgi-bin/carddisp.pl?gene=S100A12</a> |
| MSX1    | Msh Homeobox 1                               | Protein Coding | 46 | GC04P004861 | 9.957418 | <a href="https://www.genecards.org/cgi-bin/carddisp.pl?gene=MSX1">https://www.genecards.org/cgi-bin/carddisp.pl?gene=MSX1</a>       |
| CCND3   | Cyclin D3                                    | Protein Coding | 48 | GC06M041934 | 9.956216 | <a href="https://www.genecards.org/cgi-bin/carddisp.pl?gene=CCND3">https://www.genecards.org/cgi-bin/carddisp.pl?gene=CCND3</a>     |
| HBS1L   | HBS1 Like Translational GTPase               | Protein Coding | 40 | GC06M134960 | 9.952188 | <a href="https://www.genecards.org/cgi-bin/carddisp.pl?gene=HBS1L">https://www.genecards.org/cgi-bin/carddisp.pl?gene=HBS1L</a>     |
| CES3    | Carboxylesterase 3                           | Protein Coding | 40 | GC16P066963 | 9.941638 | <a href="https://www.genecards.org/cgi-bin/carddisp.pl?gene=CES3">https://www.genecards.org/cgi-bin/carddisp.pl?gene=CES3</a>       |
| DEFB1   | Defensin Beta 1                              | Protein Coding | 40 | GC08M006870 | 9.94135  | <a href="https://www.genecards.org/cgi-bin/carddisp.pl?gene=DEFB1">https://www.genecards.org/cgi-bin/carddisp.pl?gene=DEFB1</a>     |
| HTR7    | 5-Hydroxytryptamine Receptor 7               | Protein Coding | 48 | GC10M090740 | 9.931    | <a href="https://www.genecards.org/cgi-bin/carddisp.pl?gene=HTR7">https://www.genecards.org/cgi-bin/carddisp.pl?gene=HTR7</a>       |
| MLC1    | Modulator Of VRAC Current 1                  | Protein Coding | 42 | GC22M050059 | 9.927547 | <a href="https://www.genecards.org/cgi-bin/carddisp.pl?gene=MLC1">https://www.genecards.org/cgi-bin/carddisp.pl?gene=MLC1</a>       |
| HINT1   | Histidine Triad Nucleotide Binding Protein 1 | Protein Coding | 45 | GC05M131159 | 9.924173 | <a href="https://www.genecards.org/cgi-bin/carddisp.pl?gene=HINT1">https://www.genecards.org/cgi-bin/carddisp.pl?gene=HINT1</a>     |
| PTS     | 6-Pyruvoyltetrahydropterin Synthase          | Protein Coding | 48 | GC11P112226 | 9.922934 | <a href="https://www.genecards.org/cgi-bin/carddisp.pl?gene=PTS">https://www.genecards.org/cgi-bin/carddisp.pl?gene=PTS</a>         |
| SGK1    | Serum/Glucocorticoid Regulated Kinase 1      | Protein Coding | 50 | GC06M134169 | 9.90464  | <a href="https://www.genecards.org/cgi-bin/carddisp.pl?gene=SGK1">https://www.genecards.org/cgi-bin/carddisp.pl?gene=SGK1</a>       |
| RBP5    | Retinol Binding Protein 5                    | Protein Coding | 37 | GC12M007194 | 9.903232 | <a href="https://www.genecards.org/cgi-bin/carddisp.pl?gene=RBP5">https://www.genecards.org/cgi-bin/carddisp.pl?gene=RBP5</a>       |
| NLRC4   | NLR Family CARD Domain Containing 4          | Protein Coding | 45 | GC02M032224 | 9.898811 | <a href="https://www.genecards.org/cgi-bin/carddisp.pl?gene=NLRC4">https://www.genecards.org/cgi-bin/carddisp.pl?gene=NLRC4</a>     |

|          |                                                                                |                |    |             |          |                                                                                                                                       |
|----------|--------------------------------------------------------------------------------|----------------|----|-------------|----------|---------------------------------------------------------------------------------------------------------------------------------------|
| EFTUD2   | Elongation Factor Tu GTP Binding Domain Containing 2 Dual                      | Protein Coding | 43 | GC17M044852 | 9.892878 | <a href="https://www.genecards.org/cgi-bin/carddisp.pl?gene=EFTUD2">https://www.genecards.org/cgi-bin/carddisp.pl?gene=EFTUD2</a>     |
| DSTYK    | Serine/Threonine And Tyrosine Protein Kinase                                   | Protein Coding | 42 | GC01M205111 | 9.860373 | <a href="https://www.genecards.org/cgi-bin/carddisp.pl?gene=DSTYK">https://www.genecards.org/cgi-bin/carddisp.pl?gene=DSTYK</a>       |
| HSF1     | Heat Shock Transcription Factor 1                                              | Protein Coding | 45 | GC08P144291 | 9.852005 | <a href="https://www.genecards.org/cgi-bin/carddisp.pl?gene=HSF1">https://www.genecards.org/cgi-bin/carddisp.pl?gene=HSF1</a>         |
| LAT      | Linker For Activation Of T Cells                                               | Protein Coding | 47 | GC16P032276 | 9.851159 | <a href="https://www.genecards.org/cgi-bin/carddisp.pl?gene=LAT">https://www.genecards.org/cgi-bin/carddisp.pl?gene=LAT</a>           |
| GPD2     | Glycerol-3-Phosphate Dehydrogenase 2                                           | Protein Coding | 47 | GC02P156435 | 9.848467 | <a href="https://www.genecards.org/cgi-bin/carddisp.pl?gene=GPD2">https://www.genecards.org/cgi-bin/carddisp.pl?gene=GPD2</a>         |
| APLN     | Apelin                                                                         | Protein Coding | 37 | GC0XM129645 | 9.84015  | <a href="https://www.genecards.org/cgi-bin/carddisp.pl?gene=APLN">https://www.genecards.org/cgi-bin/carddisp.pl?gene=APLN</a>         |
| MUC2     | Mucin 2, Oligomeric Mucus/Gel-Forming                                          | Protein Coding | 40 | GC11P001074 | 9.836618 | <a href="https://www.genecards.org/cgi-bin/carddisp.pl?gene=MUC2">https://www.genecards.org/cgi-bin/carddisp.pl?gene=MUC2</a>         |
| MC1R     | Melanocortin 1 Receptor                                                        | Protein Coding | 48 | GC16P089912 | 9.835869 | <a href="https://www.genecards.org/cgi-bin/carddisp.pl?gene=MC1R">https://www.genecards.org/cgi-bin/carddisp.pl?gene=MC1R</a>         |
| RBBP8    | RB Binding Protein 8, Endonuclease                                             | Protein Coding | 45 | GC18P022798 | 9.835569 | <a href="https://www.genecards.org/cgi-bin/carddisp.pl?gene=RBBP8">https://www.genecards.org/cgi-bin/carddisp.pl?gene=RBBP8</a>       |
| SLC26A2  | Solute Carrier Family 26 Member 2                                              | Protein Coding | 45 | GC05P149944 | 9.832773 | <a href="https://www.genecards.org/cgi-bin/carddisp.pl?gene=SLC26A2">https://www.genecards.org/cgi-bin/carddisp.pl?gene=SLC26A2</a>   |
| SNRNP200 | Small Nuclear Ribonucleoprotein U5 Subunit 200                                 | Protein Coding | 42 | GC02M096363 | 9.823989 | <a href="https://www.genecards.org/cgi-bin/carddisp.pl?gene=SNRNP200">https://www.genecards.org/cgi-bin/carddisp.pl?gene=SNRNP200</a> |
| ALDH1A2  | Aldehyde Dehydrogenase 1 Family Member A2                                      | Protein Coding | 48 | GC15M067289 | 9.82165  | <a href="https://www.genecards.org/cgi-bin/carddisp.pl?gene=ALDH1A2">https://www.genecards.org/cgi-bin/carddisp.pl?gene=ALDH1A2</a>   |
| YWHAE    | Tyrosine 3-Monooxygenase/Tryptophan 5-Monooxygenase Activation Protein Epsilon | Protein Coding | 50 | GC17M001346 | 9.817562 | <a href="https://www.genecards.org/cgi-bin/carddisp.pl?gene=YWHAE">https://www.genecards.org/cgi-bin/carddisp.pl?gene=YWHAE</a>       |
| SIX1     | SIX Homeobox 1                                                                 | Protein Coding | 45 | GC14M060643 | 9.815974 | <a href="https://www.genecards.org/cgi-bin/carddisp.pl?gene=SIX1">https://www.genecards.org/cgi-bin/carddisp.pl?gene=SIX1</a>         |
| TRIB1    | Tribbles Pseudokinase 1                                                        | Protein Coding | 38 | GC08P125430 | 9.814937 | <a href="https://www.genecards.org/cgi-bin/carddisp.pl?gene=TRIB1">https://www.genecards.org/cgi-bin/carddisp.pl?gene=TRIB1</a>       |
| MIR133A1 | MicroRNA 133a-1                                                                | RNA Gene       | 18 | GC18M021826 | 9.812485 | <a href="https://www.genecards.org/cgi-bin/carddisp.pl?gene=MIR133A1">https://www.genecards.org/cgi-bin/carddisp.pl?gene=MIR133A1</a> |

|         |                                                      |                |    |             |          |                                                                                                                                     |
|---------|------------------------------------------------------|----------------|----|-------------|----------|-------------------------------------------------------------------------------------------------------------------------------------|
| BMPR1B  | Bone Morphogenetic Protein Receptor Type 1B          | Protein Coding | 51 | GC04P094757 | 9.811538 | <a href="https://www.genecards.org/cgi-bin/carddisp.pl?gene=BMPR1B">https://www.genecards.org/cgi-bin/carddisp.pl?gene=BMPR1B</a>   |
| SIN3A   | SIN3 Transcription Regulator Family Member A         | Protein Coding | 47 | GC15M075369 | 9.811155 | <a href="https://www.genecards.org/cgi-bin/carddisp.pl?gene=SIN3A">https://www.genecards.org/cgi-bin/carddisp.pl?gene=SIN3A</a>     |
| PLA2G15 | Phospholipase A2 Group XV                            | Protein Coding | 37 | GC16P068245 | 9.802227 | <a href="https://www.genecards.org/cgi-bin/carddisp.pl?gene=PLA2G15">https://www.genecards.org/cgi-bin/carddisp.pl?gene=PLA2G15</a> |
| GDF5    | Growth Differentiation Factor 5                      | Protein Coding | 47 | GC20M035433 | 9.798262 | <a href="https://www.genecards.org/cgi-bin/carddisp.pl?gene=GDF5">https://www.genecards.org/cgi-bin/carddisp.pl?gene=GDF5</a>       |
| UCA1    | Urothelial Cancer Associated 1                       | RNA Gene       | 22 | GC19P015828 | 9.798042 | <a href="https://www.genecards.org/cgi-bin/carddisp.pl?gene=UCA1">https://www.genecards.org/cgi-bin/carddisp.pl?gene=UCA1</a>       |
| ARVCF   | ARVCF Delta Catenin Family Member                    | Protein Coding | 38 | GC22M019966 | 9.794188 | <a href="https://www.genecards.org/cgi-bin/carddisp.pl?gene=ARVCF">https://www.genecards.org/cgi-bin/carddisp.pl?gene=ARVCF</a>     |
| ACY1    | Aminoacylase 1                                       | Protein Coding | 47 | GC03P051983 | 9.782999 | <a href="https://www.genecards.org/cgi-bin/carddisp.pl?gene=ACY1">https://www.genecards.org/cgi-bin/carddisp.pl?gene=ACY1</a>       |
| KCNA1   | Potassium Voltage-Gated Channel Subfamily A Member 1 | Protein Coding | 46 | GC12P011800 | 9.775926 | <a href="https://www.genecards.org/cgi-bin/carddisp.pl?gene=KCNA1">https://www.genecards.org/cgi-bin/carddisp.pl?gene=KCNA1</a>     |
| LACTB   | Lactamase Beta                                       | Protein Coding | 36 | GC15P077630 | 9.773698 | <a href="https://www.genecards.org/cgi-bin/carddisp.pl?gene=LACTB">https://www.genecards.org/cgi-bin/carddisp.pl?gene=LACTB</a>     |
| LAP3    | Leucine Aminopeptidase 3                             | Protein Coding | 44 | GC04P017578 | 9.765542 | <a href="https://www.genecards.org/cgi-bin/carddisp.pl?gene=LAP3">https://www.genecards.org/cgi-bin/carddisp.pl?gene=LAP3</a>       |
| HOXA13  | Homeobox A13                                         | Protein Coding | 44 | GC07M027347 | 9.745737 | <a href="https://www.genecards.org/cgi-bin/carddisp.pl?gene=HOXA13">https://www.genecards.org/cgi-bin/carddisp.pl?gene=HOXA13</a>   |
| DPYSL2  | Dihydropyrimidinase Like 2                           | Protein Coding | 46 | GC08P026514 | 9.740933 | <a href="https://www.genecards.org/cgi-bin/carddisp.pl?gene=DPYSL2">https://www.genecards.org/cgi-bin/carddisp.pl?gene=DPYSL2</a>   |
| PINX1   | PIN2 (TERF1) Interacting Telomerase Inhibitor 1      | Protein Coding | 39 | GC08M010726 | 9.737506 | <a href="https://www.genecards.org/cgi-bin/carddisp.pl?gene=PINX1">https://www.genecards.org/cgi-bin/carddisp.pl?gene=PINX1</a>     |
| IBSP    | Integrin Binding Sialoprotein                        | Protein Coding | 38 | GC04P087799 | 9.730112 | <a href="https://www.genecards.org/cgi-bin/carddisp.pl?gene=IBSP">https://www.genecards.org/cgi-bin/carddisp.pl?gene=IBSP</a>       |
| RRAS    | RAS Related                                          | Protein Coding | 44 | GC19M049635 | 9.728992 | <a href="https://www.genecards.org/cgi-bin/carddisp.pl?gene=RRAS">https://www.genecards.org/cgi-bin/carddisp.pl?gene=RRAS</a>       |
| LGALS1  | Galectin 1                                           | Protein Coding | 44 | GC22P037675 | 9.727539 | <a href="https://www.genecards.org/cgi-bin/carddisp.pl?gene=LGALS1">https://www.genecards.org/cgi-bin/carddisp.pl?gene=LGALS1</a>   |
| CGB5    | Chorionic Gonadotropin Subunit Beta 5                | Protein Coding | 33 | GC19P049043 | 9.710341 | <a href="https://www.genecards.org/cgi-bin/carddisp.pl?gene=CGB5">https://www.genecards.org/cgi-bin/carddisp.pl?gene=CGB5</a>       |
| TRPS1   | Transcriptional Repressor GATA Binding 1             | Protein Coding | 46 | GC08M115408 | 9.708651 | <a href="https://www.genecards.org/cgi-bin/carddisp.pl?gene=TRPS1">https://www.genecards.org/cgi-bin/carddisp.pl?gene=TRPS1</a>     |

|          |                                                           |                |    |             |          |                                                                                                                                       |
|----------|-----------------------------------------------------------|----------------|----|-------------|----------|---------------------------------------------------------------------------------------------------------------------------------------|
| HEPN1    | Hepatocellular Carcinoma, Down-Regulated 1 Peptidylprolyl | RNA Gene       | 25 | GC11P124919 | 9.708522 | <a href="https://www.genecards.org/cgi-bin/carddisp.pl?gene=HEPN1">https://www.genecards.org/cgi-bin/carddisp.pl?gene=HEPN1</a>       |
| PIN1     | Cis/Trans Isomerase, NIMA-Interacting 1                   | Protein Coding | 48 | GC19P009835 | 9.707603 | <a href="https://www.genecards.org/cgi-bin/carddisp.pl?gene=PIN1">https://www.genecards.org/cgi-bin/carddisp.pl?gene=PIN1</a>         |
| MLN      | Motilin                                                   | Protein Coding | 35 | GC06M033794 | 9.707564 | <a href="https://www.genecards.org/cgi-bin/carddisp.pl?gene=MLN">https://www.genecards.org/cgi-bin/carddisp.pl?gene=MLN</a>           |
| RAB5A    | RAB5A, Member RAS Oncogene Family                         | Protein Coding | 47 | GC03P019963 | 9.707016 | <a href="https://www.genecards.org/cgi-bin/carddisp.pl?gene=RAB5A">https://www.genecards.org/cgi-bin/carddisp.pl?gene=RAB5A</a>       |
| MLX      | MAX Dimerization Protein MLX                              | Protein Coding | 44 | GC17P042567 | 9.701429 | <a href="https://www.genecards.org/cgi-bin/carddisp.pl?gene=MLX">https://www.genecards.org/cgi-bin/carddisp.pl?gene=MLX</a>           |
| EEF2     | Eukaryotic Translation Elongation Factor 2                | Protein Coding | 49 | GC19M003976 | 9.701408 | <a href="https://www.genecards.org/cgi-bin/carddisp.pl?gene=EEF2">https://www.genecards.org/cgi-bin/carddisp.pl?gene=EEF2</a>         |
| NDUFC2   | NADH:Ubiquinone Oxidoreductase Subunit C2                 | Protein Coding | 41 | GC11M078068 | 9.700644 | <a href="https://www.genecards.org/cgi-bin/carddisp.pl?gene=NDUFC2">https://www.genecards.org/cgi-bin/carddisp.pl?gene=NDUFC2</a>     |
| EXT2     | Exostosin Glycosyltransferase 2                           | Protein Coding | 47 | GC11P044095 | 9.695638 | <a href="https://www.genecards.org/cgi-bin/carddisp.pl?gene=EXT2">https://www.genecards.org/cgi-bin/carddisp.pl?gene=EXT2</a>         |
| KLB      | Klotho Beta                                               | Protein Coding | 40 | GC04P039408 | 9.694351 | <a href="https://www.genecards.org/cgi-bin/carddisp.pl?gene=KLB">https://www.genecards.org/cgi-bin/carddisp.pl?gene=KLB</a>           |
| NOS1AP   | Nitric Oxide Synthase 1 Adaptor Protein                   | Protein Coding | 39 | GC01P162069 | 9.693832 | <a href="https://www.genecards.org/cgi-bin/carddisp.pl?gene=NOS1AP">https://www.genecards.org/cgi-bin/carddisp.pl?gene=NOS1AP</a>     |
| ESD      | Esterase D                                                | Protein Coding | 44 | GC13M046771 | 9.693583 | <a href="https://www.genecards.org/cgi-bin/carddisp.pl?gene=ESD">https://www.genecards.org/cgi-bin/carddisp.pl?gene=ESD</a>           |
| TNFRSF6B | TNF Receptor Superfamily Member 6b                        | Protein Coding | 43 | GC20P063696 | 9.691906 | <a href="https://www.genecards.org/cgi-bin/carddisp.pl?gene=TNFRSF6B">https://www.genecards.org/cgi-bin/carddisp.pl?gene=TNFRSF6B</a> |
| LAMB3    | Laminin Subunit Beta 3                                    | Protein Coding | 46 | GC01M209614 | 9.690313 | <a href="https://www.genecards.org/cgi-bin/carddisp.pl?gene=LAMB3">https://www.genecards.org/cgi-bin/carddisp.pl?gene=LAMB3</a>       |
| IRF4     | Interferon Regulatory Factor 4                            | Protein Coding | 44 | GC06P000391 | 9.684427 | <a href="https://www.genecards.org/cgi-bin/carddisp.pl?gene=IRF4">https://www.genecards.org/cgi-bin/carddisp.pl?gene=IRF4</a>         |
| CACNA1G  | Calcium Voltage-Gated Channel Subunit Alpha1G             | Protein Coding | 50 | GC17P050561 | 9.672054 | <a href="https://www.genecards.org/cgi-bin/carddisp.pl?gene=CACNA1G">https://www.genecards.org/cgi-bin/carddisp.pl?gene=CACNA1G</a>   |
| PEBP1    | Phosphatidylethanolamine Binding Protein 1                | Protein Coding | 45 | GC12P118135 | 9.668007 | <a href="https://www.genecards.org/cgi-bin/carddisp.pl?gene=PEBP1">https://www.genecards.org/cgi-bin/carddisp.pl?gene=PEBP1</a>       |
| LIPI     | Lipase I                                                  | Protein Coding | 37 | GC21M014108 | 9.665094 | <a href="https://www.genecards.org/cgi-bin/carddisp.pl?gene=LIPI">https://www.genecards.org/cgi-bin/carddisp.pl?gene=LIPI</a>         |

|          |                                                |                |    |             |          |                                                                                                                                       |
|----------|------------------------------------------------|----------------|----|-------------|----------|---------------------------------------------------------------------------------------------------------------------------------------|
| ITPR2    | Inositol 1,4,5-Trisphosphate Receptor Type 2   | Protein Coding | 47 | GC12M026336 | 9.661568 | <a href="https://www.genecards.org/cgi-bin/carddisp.pl?gene=ITPR2">https://www.genecards.org/cgi-bin/carddisp.pl?gene=ITPR2</a>       |
| ROS1     | ROS Proto-Oncogene 1, Receptor Tyrosine Kinase | Protein Coding | 45 | GC06M117287 | 9.660614 | <a href="https://www.genecards.org/cgi-bin/carddisp.pl?gene=ROS1">https://www.genecards.org/cgi-bin/carddisp.pl?gene=ROS1</a>         |
| CCR4     | C-C Motif Chemokine Receptor 4                 | Protein Coding | 45 | GC03P032951 | 9.656151 | <a href="https://www.genecards.org/cgi-bin/carddisp.pl?gene=CCR4">https://www.genecards.org/cgi-bin/carddisp.pl?gene=CCR4</a>         |
| CLDN2    | Claudin 2                                      | Protein Coding | 42 | GC0XP106900 | 9.653544 | <a href="https://www.genecards.org/cgi-bin/carddisp.pl?gene=CLDN2">https://www.genecards.org/cgi-bin/carddisp.pl?gene=CLDN2</a>       |
| SRPRA    | SRP Receptor Subunit Alpha                     | Protein Coding | 31 | GC11M126255 | 9.650832 | <a href="https://www.genecards.org/cgi-bin/carddisp.pl?gene=SRPRA">https://www.genecards.org/cgi-bin/carddisp.pl?gene=SRPRA</a>       |
| SLC25A22 | Solute Carrier Family 25 Member 22             | Protein Coding | 41 | GC11M001138 | 9.641376 | <a href="https://www.genecards.org/cgi-bin/carddisp.pl?gene=SLC25A22">https://www.genecards.org/cgi-bin/carddisp.pl?gene=SLC25A22</a> |
| PSMC4    | Proteasome 26S Subunit, ATPase 4               | Protein Coding | 41 | GC19P040529 | 9.641056 | <a href="https://www.genecards.org/cgi-bin/carddisp.pl?gene=PSMC4">https://www.genecards.org/cgi-bin/carddisp.pl?gene=PSMC4</a>       |
| GPI      | Glucose-6-Phosphate Isomerase                  | Protein Coding | 47 | GC19P034359 | 9.637764 | <a href="https://www.genecards.org/cgi-bin/carddisp.pl?gene=GPI">https://www.genecards.org/cgi-bin/carddisp.pl?gene=GPI</a>           |
| MIR206   | MicroRNA 206                                   | RNA Gene       | 20 | GC06P052144 | 9.633758 | <a href="https://www.genecards.org/cgi-bin/carddisp.pl?gene=MIR206">https://www.genecards.org/cgi-bin/carddisp.pl?gene=MIR206</a>     |
| TBX3     | T-Box Transcription Factor 3                   | Protein Coding | 46 | GC12M114670 | 9.630539 | <a href="https://www.genecards.org/cgi-bin/carddisp.pl?gene=TBX3">https://www.genecards.org/cgi-bin/carddisp.pl?gene=TBX3</a>         |
| MYH10    | Myosin Heavy Chain 10                          | Protein Coding | 47 | GC17M008474 | 9.621515 | <a href="https://www.genecards.org/cgi-bin/carddisp.pl?gene=MYH10">https://www.genecards.org/cgi-bin/carddisp.pl?gene=MYH10</a>       |
| FDXR     | Ferredoxin Reductase                           | Protein Coding | 45 | GC17M074862 | 9.619843 | <a href="https://www.genecards.org/cgi-bin/carddisp.pl?gene=FDXR">https://www.genecards.org/cgi-bin/carddisp.pl?gene=FDXR</a>         |
| CYP46A1  | Cytochrome P450 Family 46 Subfamily A Member 1 | Protein Coding | 42 | GC14P099684 | 9.607603 | <a href="https://www.genecards.org/cgi-bin/carddisp.pl?gene=CYP46A1">https://www.genecards.org/cgi-bin/carddisp.pl?gene=CYP46A1</a>   |
| MIR101-1 | MicroRNA 101-1                                 | RNA Gene       | 19 | GC01M065058 | 9.602142 | <a href="https://www.genecards.org/cgi-bin/carddisp.pl?gene=MIR101-1">https://www.genecards.org/cgi-bin/carddisp.pl?gene=MIR101-1</a> |
| ANO1     | Anoctamin 1                                    | Protein Coding | 41 | GC11P069986 | 9.599813 | <a href="https://www.genecards.org/cgi-bin/carddisp.pl?gene=ANO1">https://www.genecards.org/cgi-bin/carddisp.pl?gene=ANO1</a>         |
| FGF4     | Fibroblast Growth Factor 4                     | Protein Coding | 44 | GC11M070438 | 9.595882 | <a href="https://www.genecards.org/cgi-bin/carddisp.pl?gene=FGF4">https://www.genecards.org/cgi-bin/carddisp.pl?gene=FGF4</a>         |
| KLF4     | Kruppel Like Factor 4                          | Protein Coding | 46 | GC09M107484 | 9.595719 | <a href="https://www.genecards.org/cgi-bin/carddisp.pl?gene=KLF4">https://www.genecards.org/cgi-bin/carddisp.pl?gene=KLF4</a>         |
| CYP4F12  | Cytochrome P450 Family 4 Subfamily F Member 12 | Protein Coding | 43 | GC19P015672 | 9.591684 | <a href="https://www.genecards.org/cgi-bin/carddisp.pl?gene=CYP4F12">https://www.genecards.org/cgi-bin/carddisp.pl?gene=CYP4F12</a>   |
| CDH4     | Cadherin 4                                     | Protein Coding | 43 | GC20P061252 | 9.591014 | <a href="https://www.genecards.org/cgi-bin/carddisp.pl?gene=CDH4">https://www.genecards.org/cgi-bin/carddisp.pl?gene=CDH4</a>         |
| CYP8B1   | Cytochrome P450 Family 8 Subfamily B Member 1  | Protein Coding | 41 | GC03M042856 | 9.584629 | <a href="https://www.genecards.org/cgi-bin/carddisp.pl?gene=CYP8B1">https://www.genecards.org/cgi-bin/carddisp.pl?gene=CYP8B1</a>     |

|          |                                                 |                |    |             |          |                                                                                                                                       |
|----------|-------------------------------------------------|----------------|----|-------------|----------|---------------------------------------------------------------------------------------------------------------------------------------|
| MIRLET7I | MicroRNA Let-7i                                 | RNA Gene       | 20 | GC12P062606 | 9.58396  | <a href="https://www.genecards.org/cgi-bin/carddisp.pl?gene=MIRLET7I">https://www.genecards.org/cgi-bin/carddisp.pl?gene=MIRLET7I</a> |
| PLIN5    | Perilipin 5                                     | Protein Coding | 33 | GC19M004522 | 9.575938 | <a href="https://www.genecards.org/cgi-bin/carddisp.pl?gene=PLIN5">https://www.genecards.org/cgi-bin/carddisp.pl?gene=PLIN5</a>       |
| SSTR2    | Somatostatin Receptor 2                         | Protein Coding | 48 | GC17P073165 | 9.569769 | <a href="https://www.genecards.org/cgi-bin/carddisp.pl?gene=SSTR2">https://www.genecards.org/cgi-bin/carddisp.pl?gene=SSTR2</a>       |
| IL1RAPL1 | Interleukin 1 Receptor Accessory Protein Like 1 | Protein Coding | 43 | GC0XP028605 | 9.563024 | <a href="https://www.genecards.org/cgi-bin/carddisp.pl?gene=IL1RAPL1">https://www.genecards.org/cgi-bin/carddisp.pl?gene=IL1RAPL1</a> |
| PCSK1    | Proprotein Convertase Subtilisin/Kexin Type 1   | Protein Coding | 47 | GC05M096391 | 9.562442 | <a href="https://www.genecards.org/cgi-bin/carddisp.pl?gene=PCSK1">https://www.genecards.org/cgi-bin/carddisp.pl?gene=PCSK1</a>       |
| CXCL11   | C-X-C Motif Chemokine Ligand 11                 | Protein Coding | 41 | GC04M076033 | 9.558039 | <a href="https://www.genecards.org/cgi-bin/carddisp.pl?gene=CXCL11">https://www.genecards.org/cgi-bin/carddisp.pl?gene=CXCL11</a>     |
| POLR3B   | RNA Polymerase III Subunit B                    | Protein Coding | 44 | GC12P106357 | 9.551197 | <a href="https://www.genecards.org/cgi-bin/carddisp.pl?gene=POLR3B">https://www.genecards.org/cgi-bin/carddisp.pl?gene=POLR3B</a>     |
| SLC22A2  | Solute Carrier Family 22 Member 2               | Protein Coding | 45 | GC06M160173 | 9.550129 | <a href="https://www.genecards.org/cgi-bin/carddisp.pl?gene=SLC22A2">https://www.genecards.org/cgi-bin/carddisp.pl?gene=SLC22A2</a>   |
| GCLM     | Glutamate-Cysteine Ligase Modifier Subunit      | Protein Coding | 43 | GC01M093885 | 9.543106 | <a href="https://www.genecards.org/cgi-bin/carddisp.pl?gene=GCLM">https://www.genecards.org/cgi-bin/carddisp.pl?gene=GCLM</a>         |
| NR4A1    | Nuclear Receptor Subfamily 4 Group A Member 1   | Protein Coding | 47 | GC12P052022 | 9.542297 | <a href="https://www.genecards.org/cgi-bin/carddisp.pl?gene=NR4A1">https://www.genecards.org/cgi-bin/carddisp.pl?gene=NR4A1</a>       |
| SACS     | Sacsin Molecular Chaperone                      | Protein Coding | 36 | GC13M023328 | 9.54215  | <a href="https://www.genecards.org/cgi-bin/carddisp.pl?gene=SACS">https://www.genecards.org/cgi-bin/carddisp.pl?gene=SACS</a>         |
| LCN1     | Lipocalin 1                                     | Protein Coding | 40 | GC09P135521 | 9.528162 | <a href="https://www.genecards.org/cgi-bin/carddisp.pl?gene=LCN1">https://www.genecards.org/cgi-bin/carddisp.pl?gene=LCN1</a>         |
| CD58     | CD58 Molecule                                   | Protein Coding | 40 | GC01M116514 | 9.52731  | <a href="https://www.genecards.org/cgi-bin/carddisp.pl?gene=CD58">https://www.genecards.org/cgi-bin/carddisp.pl?gene=CD58</a>         |
| IMMT     | Inner Mitochondrial Membrane Protein            | Protein Coding | 40 | GC02M086144 | 9.525806 | <a href="https://www.genecards.org/cgi-bin/carddisp.pl?gene=IMMT">https://www.genecards.org/cgi-bin/carddisp.pl?gene=IMMT</a>         |
| PIBF1    | Progesterone Immunomodulatory Binding Factor 1  | Protein Coding | 41 | GC13P072782 | 9.525472 | <a href="https://www.genecards.org/cgi-bin/carddisp.pl?gene=PIBF1">https://www.genecards.org/cgi-bin/carddisp.pl?gene=PIBF1</a>       |
| RAD21    | RAD21 Cohesin Complex Component                 | Protein Coding | 46 | GC08M116846 | 9.523025 | <a href="https://www.genecards.org/cgi-bin/carddisp.pl?gene=RAD21">https://www.genecards.org/cgi-bin/carddisp.pl?gene=RAD21</a>       |
| CSNK2B   | Casein Kinase 2 Beta                            | Protein Coding | 50 | GC06P055205 | 9.521455 | <a href="https://www.genecards.org/cgi-bin/carddisp.pl?gene=CSNK2B">https://www.genecards.org/cgi-bin/carddisp.pl?gene=CSNK2B</a>     |
| PDXK     | Pyridoxal Kinase                                | Protein Coding | 49 | GC21P043719 | 9.514806 | <a href="https://www.genecards.org/cgi-bin/carddisp.pl?gene=PDXK">https://www.genecards.org/cgi-bin/carddisp.pl?gene=PDXK</a>         |

|          |                                                                                              |                   |    |                 |          |                                                                                                                                       |
|----------|----------------------------------------------------------------------------------------------|-------------------|----|-----------------|----------|---------------------------------------------------------------------------------------------------------------------------------------|
| CDKN2C   | Cyclin<br>Dependent<br>Kinase Inhibitor<br>2C                                                | Protein<br>Coding | 47 | GC01P0509<br>60 | 9.511284 | <a href="https://www.genecards.org/cgi-bin/carddisp.pl?gene=CDKN2C">https://www.genecards.org/cgi-bin/carddisp.pl?gene=CDKN2C</a>     |
| COX7B    | Cytochrome C<br>Oxidase<br>Subunit 7B                                                        | Protein<br>Coding | 41 | GC0XP0778<br>99 | 9.507709 | <a href="https://www.genecards.org/cgi-bin/carddisp.pl?gene=COX7B">https://www.genecards.org/cgi-bin/carddisp.pl?gene=COX7B</a>       |
| LYN      | LYN Proto-<br>Oncogene, Src<br>Family Tyrosine<br>Kinase                                     | Protein<br>Coding | 50 | GC08P0558<br>79 | 9.483194 | <a href="https://www.genecards.org/cgi-bin/carddisp.pl?gene=LYN">https://www.genecards.org/cgi-bin/carddisp.pl?gene=LYN</a>           |
| ZFPM2    | Zinc Finger<br>Protein, FOG<br>Family Member<br>2                                            | Protein<br>Coding | 43 | GC08P1045<br>90 | 9.482496 | <a href="https://www.genecards.org/cgi-bin/carddisp.pl?gene=ZFPM2">https://www.genecards.org/cgi-bin/carddisp.pl?gene=ZFPM2</a>       |
| PRDX2    | Peroxiredoxin 2                                                                              | Protein<br>Coding | 47 | GC19M012<br>796 | 9.481212 | <a href="https://www.genecards.org/cgi-bin/carddisp.pl?gene=PRDX2">https://www.genecards.org/cgi-bin/carddisp.pl?gene=PRDX2</a>       |
| TCN2     | Transcobalamin 2                                                                             | Protein<br>Coding | 44 | GC22P0306<br>06 | 9.473805 | <a href="https://www.genecards.org/cgi-bin/carddisp.pl?gene=TCN2">https://www.genecards.org/cgi-bin/carddisp.pl?gene=TCN2</a>         |
| ALAS1    | 5'-<br>Aminolevulinat<br>e Synthase 1                                                        | Protein<br>Coding | 45 | GC03P0521<br>98 | 9.471748 | <a href="https://www.genecards.org/cgi-bin/carddisp.pl?gene=ALAS1">https://www.genecards.org/cgi-bin/carddisp.pl?gene=ALAS1</a>       |
| ZBTB16   | Zinc Finger<br>And BTB<br>Domain<br>Containing 16                                            | Protein<br>Coding | 47 | GC11P1140<br>59 | 9.471152 | <a href="https://www.genecards.org/cgi-bin/carddisp.pl?gene=ZBTB16">https://www.genecards.org/cgi-bin/carddisp.pl?gene=ZBTB16</a>     |
| SKP2     | S-Phase Kinase<br>Associated<br>Protein 2                                                    | Protein<br>Coding | 45 | GC05P0361<br>51 | 9.466455 | <a href="https://www.genecards.org/cgi-bin/carddisp.pl?gene=SKP2">https://www.genecards.org/cgi-bin/carddisp.pl?gene=SKP2</a>         |
| GRIK1    | Glutamate<br>Ionotropic<br>Receptor<br>Kainate Type<br>Subunit 1<br>Calcium<br>Voltage-Gated | Protein<br>Coding | 45 | GC21M029<br>536 | 9.466169 | <a href="https://www.genecards.org/cgi-bin/carddisp.pl?gene=GRIK1">https://www.genecards.org/cgi-bin/carddisp.pl?gene=GRIK1</a>       |
| CACNA2D1 | Channel<br>Auxiliary<br>Subunit<br>Alpha2delta 1                                             | Protein<br>Coding | 47 | GC07M081<br>946 | 9.455549 | <a href="https://www.genecards.org/cgi-bin/carddisp.pl?gene=CACNA2D1">https://www.genecards.org/cgi-bin/carddisp.pl?gene=CACNA2D1</a> |
| AZGP1    | Alpha-2-<br>Glycoprotein 1,<br>Zinc-Binding<br>ATPase                                        | Protein<br>Coding | 44 | GC07M099<br>967 | 9.447481 | <a href="https://www.genecards.org/cgi-bin/carddisp.pl?gene=AZGP1">https://www.genecards.org/cgi-bin/carddisp.pl?gene=AZGP1</a>       |
| ATP1A2   | Na <sup>+</sup> /K <sup>+</sup><br>Transporting<br>Subunit Alpha<br>2                        | Protein<br>Coding | 48 | GC01P1601<br>15 | 9.445    | <a href="https://www.genecards.org/cgi-bin/carddisp.pl?gene=ATP1A2">https://www.genecards.org/cgi-bin/carddisp.pl?gene=ATP1A2</a>     |
| PRPF3    | Pre-mRNA<br>Processing<br>Factor 3                                                           | Protein<br>Coding | 44 | GC01P1503<br>21 | 9.435816 | <a href="https://www.genecards.org/cgi-bin/carddisp.pl?gene=PRPF3">https://www.genecards.org/cgi-bin/carddisp.pl?gene=PRPF3</a>       |
| RPL10    | Ribosomal<br>Protein L10                                                                     | Protein<br>Coding | 45 | GC0XP1543<br>89 | 9.427575 | <a href="https://www.genecards.org/cgi-bin/carddisp.pl?gene=RPL10">https://www.genecards.org/cgi-bin/carddisp.pl?gene=RPL10</a>       |

|         |                                                |                |    |             |          |                                                                                                                                     |
|---------|------------------------------------------------|----------------|----|-------------|----------|-------------------------------------------------------------------------------------------------------------------------------------|
| IFI27   | Interferon Alpha Inducible Protein 27          | Protein Coding | 38 | GC14P094104 | 9.423713 | <a href="https://www.genecards.org/cgi-bin/carddisp.pl?gene=IFI27">https://www.genecards.org/cgi-bin/carddisp.pl?gene=IFI27</a>     |
| COG5    | Component Of Oligomeric Golgi Complex 5        | Protein Coding | 39 | GC07M107201 | 9.401989 | <a href="https://www.genecards.org/cgi-bin/carddisp.pl?gene=COG5">https://www.genecards.org/cgi-bin/carddisp.pl?gene=COG5</a>       |
| PTGER4  | Prostaglandin E Receptor 4                     | Protein Coding | 47 | GC05P040679 | 9.398602 | <a href="https://www.genecards.org/cgi-bin/carddisp.pl?gene=PTGER4">https://www.genecards.org/cgi-bin/carddisp.pl?gene=PTGER4</a>   |
| CYP4A22 | Cytochrome P450 Family 4 Subfamily A Member 22 | Protein Coding | 36 | GC01P047142 | 9.385258 | <a href="https://www.genecards.org/cgi-bin/carddisp.pl?gene=CYP4A22">https://www.genecards.org/cgi-bin/carddisp.pl?gene=CYP4A22</a> |
| HMGA2   | High Mobility Group AT-Hook 2                  | Protein Coding | 45 | GC12P065824 | 9.385069 | <a href="https://www.genecards.org/cgi-bin/carddisp.pl?gene=HMGA2">https://www.genecards.org/cgi-bin/carddisp.pl?gene=HMGA2</a>     |
| CTNND2  | Catenin Delta 2                                | Protein Coding | 43 | GC05M010971 | 9.384844 | <a href="https://www.genecards.org/cgi-bin/carddisp.pl?gene=CTNND2">https://www.genecards.org/cgi-bin/carddisp.pl?gene=CTNND2</a>   |
| NCOA1   | Nuclear Receptor Coactivator 1 G Protein-      | Protein Coding | 45 | GC02P024492 | 9.384642 | <a href="https://www.genecards.org/cgi-bin/carddisp.pl?gene=NCOA1">https://www.genecards.org/cgi-bin/carddisp.pl?gene=NCOA1</a>     |
| GRK2    | Coupled Receptor Kinase 2                      | Protein Coding | 38 | GC11P067266 | 9.383251 | <a href="https://www.genecards.org/cgi-bin/carddisp.pl?gene=GRK2">https://www.genecards.org/cgi-bin/carddisp.pl?gene=GRK2</a>       |
| SHOC2   | SHOC2 Leucine Rich Repeat Scaffold Protein     | Protein Coding | 42 | GC10P110919 | 9.375777 | <a href="https://www.genecards.org/cgi-bin/carddisp.pl?gene=SHOC2">https://www.genecards.org/cgi-bin/carddisp.pl?gene=SHOC2</a>     |
| CYP26A1 | Cytochrome P450 Family 26 Subfamily A Member 1 | Protein Coding | 45 | GC10P093073 | 9.37438  | <a href="https://www.genecards.org/cgi-bin/carddisp.pl?gene=CYP26A1">https://www.genecards.org/cgi-bin/carddisp.pl?gene=CYP26A1</a> |
| HOTTIP  | HOXA Distal Transcript Antisense RNA           | RNA Gene       | 22 | GC07P027198 | 9.369722 | <a href="https://www.genecards.org/cgi-bin/carddisp.pl?gene=HOTTIP">https://www.genecards.org/cgi-bin/carddisp.pl?gene=HOTTIP</a>   |
| RXRB    | Retinoid X Receptor Beta                       | Protein Coding | 48 | GC06M033193 | 9.362427 | <a href="https://www.genecards.org/cgi-bin/carddisp.pl?gene=RXRB">https://www.genecards.org/cgi-bin/carddisp.pl?gene=RXRB</a>       |
| TBCK    | TBC1 Domain Containing Kinase                  | Protein Coding | 41 | GC04M106041 | 9.361692 | <a href="https://www.genecards.org/cgi-bin/carddisp.pl?gene=TBCK">https://www.genecards.org/cgi-bin/carddisp.pl?gene=TBCK</a>       |
| SLC5A7  | Solute Carrier Family 5 Member 7               | Protein Coding | 44 | GC02P107969 | 9.35228  | <a href="https://www.genecards.org/cgi-bin/carddisp.pl?gene=SLC5A7">https://www.genecards.org/cgi-bin/carddisp.pl?gene=SLC5A7</a>   |
| PAK3    | P21 (RAC1) Activated Kinase 3                  | Protein Coding | 51 | GC0XP110944 | 9.349835 | <a href="https://www.genecards.org/cgi-bin/carddisp.pl?gene=PAK3">https://www.genecards.org/cgi-bin/carddisp.pl?gene=PAK3</a>       |
| RNF113A | Ring Finger Protein 113A                       | Protein Coding | 37 | GC0XM119870 | 9.347163 | <a href="https://www.genecards.org/cgi-bin/carddisp.pl?gene=RNF113A">https://www.genecards.org/cgi-bin/carddisp.pl?gene=RNF113A</a> |
| MUSK    | Muscle Associated Receptor Tyrosine Kinase     | Protein Coding | 47 | GC09P110668 | 9.346512 | <a href="https://www.genecards.org/cgi-bin/carddisp.pl?gene=MUSK">https://www.genecards.org/cgi-bin/carddisp.pl?gene=MUSK</a>       |
| TFDP1   | Transcription Factor Dp-1                      | Protein Coding | 45 | GC13P113584 | 9.346258 | <a href="https://www.genecards.org/cgi-bin/carddisp.pl?gene=TFDP1">https://www.genecards.org/cgi-bin/carddisp.pl?gene=TFDP1</a>     |



|          |                                                     |                |    |             |          |                                                                                                                                       |
|----------|-----------------------------------------------------|----------------|----|-------------|----------|---------------------------------------------------------------------------------------------------------------------------------------|
| MIR103A1 | MicroRNA 103a-1                                     | RNA Gene       | 18 | GC05M168560 | 9.344606 | <a href="https://www.genecards.org/cgi-bin/carddisp.pl?gene=MIR103A1">https://www.genecards.org/cgi-bin/carddisp.pl?gene=MIR103A1</a> |
| PYGB     | Glycogen Phosphorylase B                            | Protein Coding | 45 | GC20P025248 | 9.343521 | <a href="https://www.genecards.org/cgi-bin/carddisp.pl?gene=PYGB">https://www.genecards.org/cgi-bin/carddisp.pl?gene=PYGB</a>         |
| F2RL1    | F2R Like Trypsin Receptor 1                         | Protein Coding | 47 | GC05P076818 | 9.332706 | <a href="https://www.genecards.org/cgi-bin/carddisp.pl?gene=F2RL1">https://www.genecards.org/cgi-bin/carddisp.pl?gene=F2RL1</a>       |
| ADRA2A   | Adrenoceptor Alpha 2A                               | Protein Coding | 47 | GC10P111077 | 9.331366 | <a href="https://www.genecards.org/cgi-bin/carddisp.pl?gene=ADRA2A">https://www.genecards.org/cgi-bin/carddisp.pl?gene=ADRA2A</a>     |
| FIS1     | Fission, Mitochondrial 1                            | Protein Coding | 39 | GC07M101239 | 9.312301 | <a href="https://www.genecards.org/cgi-bin/carddisp.pl?gene=FIS1">https://www.genecards.org/cgi-bin/carddisp.pl?gene=FIS1</a>         |
| APOM     | Apolipoprotein M                                    | Protein Coding | 40 | GC06P055209 | 9.311287 | <a href="https://www.genecards.org/cgi-bin/carddisp.pl?gene=APOM">https://www.genecards.org/cgi-bin/carddisp.pl?gene=APOM</a>         |
| SLX4     | SLX4 Structure-Specific Endonuclease Subunit        | Protein Coding | 38 | GC16M003785 | 9.304653 | <a href="https://www.genecards.org/cgi-bin/carddisp.pl?gene=SLX4">https://www.genecards.org/cgi-bin/carddisp.pl?gene=SLX4</a>         |
| HSD17B8  | Hydroxysteroid 17-Beta Dehydrogenase 8              | Protein Coding | 41 | GC06P055257 | 9.303826 | <a href="https://www.genecards.org/cgi-bin/carddisp.pl?gene=HSD17B8">https://www.genecards.org/cgi-bin/carddisp.pl?gene=HSD17B8</a>   |
| MYO6     | Myosin VI                                           | Protein Coding | 47 | GC06P075749 | 9.302847 | <a href="https://www.genecards.org/cgi-bin/carddisp.pl?gene=MYO6">https://www.genecards.org/cgi-bin/carddisp.pl?gene=MYO6</a>         |
| FZD5     | Frizzled Class Receptor 5                           | Protein Coding | 48 | GC02M207762 | 9.291054 | <a href="https://www.genecards.org/cgi-bin/carddisp.pl?gene=FZD5">https://www.genecards.org/cgi-bin/carddisp.pl?gene=FZD5</a>         |
| HAND2    | Heart And Neural Crest Derivatives Expressed 2      | Protein Coding | 45 | GC04M173524 | 9.285707 | <a href="https://www.genecards.org/cgi-bin/carddisp.pl?gene=HAND2">https://www.genecards.org/cgi-bin/carddisp.pl?gene=HAND2</a>       |
| VPS37A   | VPS37A Subunit Of ESCRT-I                           | Protein Coding | 42 | GC08P017246 | 9.284735 | <a href="https://www.genecards.org/cgi-bin/carddisp.pl?gene=VPS37A">https://www.genecards.org/cgi-bin/carddisp.pl?gene=VPS37A</a>     |
| MOGAT2   | Monoacylglycerol O-Acyltransferase 2                | Protein Coding | 38 | GC11P075717 | 9.283306 | <a href="https://www.genecards.org/cgi-bin/carddisp.pl?gene=MOGAT2">https://www.genecards.org/cgi-bin/carddisp.pl?gene=MOGAT2</a>     |
| CXCR5    | C-X-C Motif Chemokine Receptor 5                    | Protein Coding | 42 | GC11P118908 | 9.276999 | <a href="https://www.genecards.org/cgi-bin/carddisp.pl?gene=CXCR5">https://www.genecards.org/cgi-bin/carddisp.pl?gene=CXCR5</a>       |
| SLC39A4  | Solute Carrier Family 39 Member 4                   | Protein Coding | 44 | GC08M144409 | 9.274855 | <a href="https://www.genecards.org/cgi-bin/carddisp.pl?gene=SLC39A4">https://www.genecards.org/cgi-bin/carddisp.pl?gene=SLC39A4</a>   |
| MICB     | MHC Class I Polypeptide-Related Sequence B Aldehyde | Protein Coding | 42 | GC06P055197 | 9.270586 | <a href="https://www.genecards.org/cgi-bin/carddisp.pl?gene=MICB">https://www.genecards.org/cgi-bin/carddisp.pl?gene=MICB</a>         |
| ALDH4A1  | Dehydrogenase 4 Family Member A1                    | Protein Coding | 45 | GC01M018871 | 9.266251 | <a href="https://www.genecards.org/cgi-bin/carddisp.pl?gene=ALDH4A1">https://www.genecards.org/cgi-bin/carddisp.pl?gene=ALDH4A1</a>   |
| PTPRD    | Tyrosine Phosphatase Receptor Type D                | Protein Coding | 45 | GC09M008307 | 9.259614 | <a href="https://www.genecards.org/cgi-bin/carddisp.pl?gene=PTPRD">https://www.genecards.org/cgi-bin/carddisp.pl?gene=PTPRD</a>       |

|          |                                                            |                |    |             |          |                                                                                                                                       |
|----------|------------------------------------------------------------|----------------|----|-------------|----------|---------------------------------------------------------------------------------------------------------------------------------------|
| TSG101   | Tumor Susceptibility 101                                   | Protein Coding | 43 | GC11M018468 | 9.257687 | <a href="https://www.genecards.org/cgi-bin/carddisp.pl?gene=TSG101">https://www.genecards.org/cgi-bin/carddisp.pl?gene=TSG101</a>     |
| MAP3K20  | Mitogen-Activated Protein Kinase Kinase 20                 | Protein Coding | 40 | GC02P173076 | 9.256441 | <a href="https://www.genecards.org/cgi-bin/carddisp.pl?gene=MAP3K20">https://www.genecards.org/cgi-bin/carddisp.pl?gene=MAP3K20</a>   |
| MAPK8IP1 | Mitogen-Activated Protein Kinase 8 Interacting Protein 1   | Protein Coding | 46 | GC11P046089 | 9.254983 | <a href="https://www.genecards.org/cgi-bin/carddisp.pl?gene=MAPK8IP1">https://www.genecards.org/cgi-bin/carddisp.pl?gene=MAPK8IP1</a> |
| KRT13    | Keratin 13                                                 | Protein Coding | 44 | GC17M041500 | 9.236635 | <a href="https://www.genecards.org/cgi-bin/carddisp.pl?gene=KRT13">https://www.genecards.org/cgi-bin/carddisp.pl?gene=KRT13</a>       |
| CACNA1B  | Calcium Voltage-Gated Channel Subunit Alpha1 B             | Protein Coding | 50 | GC09P137877 | 9.232675 | <a href="https://www.genecards.org/cgi-bin/carddisp.pl?gene=CACNA1B">https://www.genecards.org/cgi-bin/carddisp.pl?gene=CACNA1B</a>   |
| SLC8A1   | Solute Carrier Family 8 Member A1                          | Protein Coding | 45 | GC02M040078 | 9.23237  | <a href="https://www.genecards.org/cgi-bin/carddisp.pl?gene=SLC8A1">https://www.genecards.org/cgi-bin/carddisp.pl?gene=SLC8A1</a>     |
| PRKAG1   | Protein Kinase AMP-Activated Non-Catalytic Subunit Gamma 1 | Protein Coding | 49 | GC12M049002 | 9.229853 | <a href="https://www.genecards.org/cgi-bin/carddisp.pl?gene=PRKAG1">https://www.genecards.org/cgi-bin/carddisp.pl?gene=PRKAG1</a>     |
| GRM7     | Glutamate Metabotropic Receptor 7                          | Protein Coding | 46 | GC03P006770 | 9.225903 | <a href="https://www.genecards.org/cgi-bin/carddisp.pl?gene=GRM7">https://www.genecards.org/cgi-bin/carddisp.pl?gene=GRM7</a>         |
| PLN      | Phospholamban                                              | Protein Coding | 45 | GC06P118548 | 9.225259 | <a href="https://www.genecards.org/cgi-bin/carddisp.pl?gene=PLN">https://www.genecards.org/cgi-bin/carddisp.pl?gene=PLN</a>           |
| SUMO1    | Small Ubiquitin Like Modifier 1                            | Protein Coding | 47 | GC02M202206 | 9.220978 | <a href="https://www.genecards.org/cgi-bin/carddisp.pl?gene=SUMO1">https://www.genecards.org/cgi-bin/carddisp.pl?gene=SUMO1</a>       |
| INA      | Internexin Neuronal Intermediate Filament Protein Alpha    | Protein Coding | 40 | GC10P103277 | 9.219435 | <a href="https://www.genecards.org/cgi-bin/carddisp.pl?gene=INA">https://www.genecards.org/cgi-bin/carddisp.pl?gene=INA</a>           |
| ASXL3    | ASXL Transcriptional Regulator 3                           | Protein Coding | 34 | GC18P033578 | 9.213747 | <a href="https://www.genecards.org/cgi-bin/carddisp.pl?gene=ASXL3">https://www.genecards.org/cgi-bin/carddisp.pl?gene=ASXL3</a>       |
| AGRP     | Agouti Related Neuropeptide                                | Protein Coding | 44 | GC16M067482 | 9.213259 | <a href="https://www.genecards.org/cgi-bin/carddisp.pl?gene=AGRP">https://www.genecards.org/cgi-bin/carddisp.pl?gene=AGRP</a>         |
| CRY2     | Cryptochrome Circadian Regulator 2                         | Protein Coding | 42 | GC11P046088 | 9.211872 | <a href="https://www.genecards.org/cgi-bin/carddisp.pl?gene=CRY2">https://www.genecards.org/cgi-bin/carddisp.pl?gene=CRY2</a>         |
| TTF2     | Transcription Termination Factor 2                         | Protein Coding | 40 | GC01P117060 | 9.206949 | <a href="https://www.genecards.org/cgi-bin/carddisp.pl?gene=TTF2">https://www.genecards.org/cgi-bin/carddisp.pl?gene=TTF2</a>         |
| FST      | Follistatin                                                | Protein Coding | 47 | GC05P053480 | 9.196891 | <a href="https://www.genecards.org/cgi-bin/carddisp.pl?gene=FST">https://www.genecards.org/cgi-bin/carddisp.pl?gene=FST</a>           |
| GNAI2    | G Protein Subunit Alpha I2                                 | Protein Coding | 48 | GC03P050226 | 9.1966   | <a href="https://www.genecards.org/cgi-bin/carddisp.pl?gene=GNAI2">https://www.genecards.org/cgi-bin/carddisp.pl?gene=GNAI2</a>       |

|         |                                                |                |    |             |          |                                                                                                                                     |
|---------|------------------------------------------------|----------------|----|-------------|----------|-------------------------------------------------------------------------------------------------------------------------------------|
| CYP51A1 | Cytochrome P450 Family 51 Subfamily A Member 1 | Protein Coding | 45 | GC07M092112 | 9.190638 | <a href="https://www.genecards.org/cgi-bin/carddisp.pl?gene=CYP51A1">https://www.genecards.org/cgi-bin/carddisp.pl?gene=CYP51A1</a> |
| TXNRD1  | Thioredoxin Reductase 1                        | Protein Coding | 48 | GC12P104215 | 9.189701 | <a href="https://www.genecards.org/cgi-bin/carddisp.pl?gene=TXNRD1">https://www.genecards.org/cgi-bin/carddisp.pl?gene=TXNRD1</a>   |
| CASP6   | Caspase 6                                      | Protein Coding | 49 | GC04M109688 | 9.187647 | <a href="https://www.genecards.org/cgi-bin/carddisp.pl?gene=CASP6">https://www.genecards.org/cgi-bin/carddisp.pl?gene=CASP6</a>     |
| NFATC1  | Nuclear Factor Of Activated T Cells 1          | Protein Coding | 48 | GC18P079395 | 9.186362 | <a href="https://www.genecards.org/cgi-bin/carddisp.pl?gene=NFATC1">https://www.genecards.org/cgi-bin/carddisp.pl?gene=NFATC1</a>   |
| RAPSN   | Receptor Associated Protein Of The Synapse     | Protein Coding | 43 | GC11M069002 | 9.18441  | <a href="https://www.genecards.org/cgi-bin/carddisp.pl?gene=RAPSN">https://www.genecards.org/cgi-bin/carddisp.pl?gene=RAPSN</a>     |
| FZD2    | Frizzled Class Receptor 2                      | Protein Coding | 48 | GC17P044557 | 9.182476 | <a href="https://www.genecards.org/cgi-bin/carddisp.pl?gene=FZD2">https://www.genecards.org/cgi-bin/carddisp.pl?gene=FZD2</a>       |
| RTN4IP1 | Reticulon 4 Interacting Protein 1              | Protein Coding | 43 | GC06M106571 | 9.171808 | <a href="https://www.genecards.org/cgi-bin/carddisp.pl?gene=RTN4IP1">https://www.genecards.org/cgi-bin/carddisp.pl?gene=RTN4IP1</a> |
| ARHGDIA | Rho GDP Dissociation Inhibitor Alpha           | Protein Coding | 48 | GC17M081867 | 9.168827 | <a href="https://www.genecards.org/cgi-bin/carddisp.pl?gene=ARHGDIA">https://www.genecards.org/cgi-bin/carddisp.pl?gene=ARHGDIA</a> |
| ANKRD26 | Ankyrin Repeat Domain 26                       | Protein Coding | 39 | GC10M026938 | 9.167913 | <a href="https://www.genecards.org/cgi-bin/carddisp.pl?gene=ANKRD26">https://www.genecards.org/cgi-bin/carddisp.pl?gene=ANKRD26</a> |
| MIR363  | MicroRNA 363                                   | RNA Gene       | 15 | GC0XM134205 | 9.164549 | <a href="https://www.genecards.org/cgi-bin/carddisp.pl?gene=MIR363">https://www.genecards.org/cgi-bin/carddisp.pl?gene=MIR363</a>   |
| GLYAT   | Glycine-N-Acyltransferase                      | Protein Coding | 42 | GC11M069098 | 9.160475 | <a href="https://www.genecards.org/cgi-bin/carddisp.pl?gene=GLYAT">https://www.genecards.org/cgi-bin/carddisp.pl?gene=GLYAT</a>     |
| LAMA3   | Laminin Subunit Alpha 3                        | Protein Coding | 45 | GC18P023689 | 9.158698 | <a href="https://www.genecards.org/cgi-bin/carddisp.pl?gene=LAMA3">https://www.genecards.org/cgi-bin/carddisp.pl?gene=LAMA3</a>     |
| MRC1    | Mannose Receptor C-Type 1                      | Protein Coding | 40 | GC10P017809 | 9.155283 | <a href="https://www.genecards.org/cgi-bin/carddisp.pl?gene=MRC1">https://www.genecards.org/cgi-bin/carddisp.pl?gene=MRC1</a>       |
| AP2M1   | Adaptor Related Protein Complex 2 Subunit Mu 1 | Protein Coding | 45 | GC03P184174 | 9.151634 | <a href="https://www.genecards.org/cgi-bin/carddisp.pl?gene=AP2M1">https://www.genecards.org/cgi-bin/carddisp.pl?gene=AP2M1</a>     |
| VANGL1  | VANGL Planar Cell Polarity Protein 1           | Protein Coding | 43 | GC01P115641 | 9.146841 | <a href="https://www.genecards.org/cgi-bin/carddisp.pl?gene=VANGL1">https://www.genecards.org/cgi-bin/carddisp.pl?gene=VANGL1</a>   |
| AGPAT1  | 1-Acylglycerol-3-Phosphate O-Acyltransferase 1 | Protein Coding | 43 | GC06M032168 | 9.145647 | <a href="https://www.genecards.org/cgi-bin/carddisp.pl?gene=AGPAT1">https://www.genecards.org/cgi-bin/carddisp.pl?gene=AGPAT1</a>   |
| ITGA7   | Integrin Subunit Alpha 7                       | Protein Coding | 48 | GC12M055684 | 9.142559 | <a href="https://www.genecards.org/cgi-bin/carddisp.pl?gene=ITGA7">https://www.genecards.org/cgi-bin/carddisp.pl?gene=ITGA7</a>     |
| ERG     | ETS Transcription Factor ERG                   | Protein Coding | 46 | GC21M038367 | 9.142559 | <a href="https://www.genecards.org/cgi-bin/carddisp.pl?gene=ERG">https://www.genecards.org/cgi-bin/carddisp.pl?gene=ERG</a>         |

|         |                                                                                |                   |    |                 |          |                                                                                                                                     |
|---------|--------------------------------------------------------------------------------|-------------------|----|-----------------|----------|-------------------------------------------------------------------------------------------------------------------------------------|
| ASCC1   | Activating<br>Signal<br>Cointegrator 1<br>Complex<br>Subunit 1                 | Protein<br>Coding | 42 | GC10M072<br>096 | 9.135374 | <a href="https://www.genecards.org/cgi-bin/carddisp.pl?gene=ASCC1">https://www.genecards.org/cgi-bin/carddisp.pl?gene=ASCC1</a>     |
| TYSND1  | Trypsin Like<br>Peroxisomal<br>Matrix<br>Peptidase 1                           | Protein<br>Coding | 35 | GC10M070<br>137 | 9.134365 | <a href="https://www.genecards.org/cgi-bin/carddisp.pl?gene=TYSND1">https://www.genecards.org/cgi-bin/carddisp.pl?gene=TYSND1</a>   |
| NCOA2   | Nuclear<br>Receptor<br>Coactivator 2                                           | Protein<br>Coding | 45 | GC08M070<br>109 | 9.131163 | <a href="https://www.genecards.org/cgi-bin/carddisp.pl?gene=NCOA2">https://www.genecards.org/cgi-bin/carddisp.pl?gene=NCOA2</a>     |
| TGFBR3  | Transforming<br>Growth Factor<br>Beta Receptor<br>3                            | Protein<br>Coding | 47 | GC01M091<br>680 | 9.129333 | <a href="https://www.genecards.org/cgi-bin/carddisp.pl?gene=TGFBR3">https://www.genecards.org/cgi-bin/carddisp.pl?gene=TGFBR3</a>   |
| SLC16A1 | Solute Carrier<br>Family 16<br>Member 1                                        | Protein<br>Coding | 49 | GC01M112<br>926 | 9.128418 | <a href="https://www.genecards.org/cgi-bin/carddisp.pl?gene=SLC16A1">https://www.genecards.org/cgi-bin/carddisp.pl?gene=SLC16A1</a> |
| COMMD1  | Copper<br>Metabolism<br>Domain<br>Containing 1                                 | Protein<br>Coding | 43 | GC02P0618<br>88 | 9.111311 | <a href="https://www.genecards.org/cgi-bin/carddisp.pl?gene=COMMD1">https://www.genecards.org/cgi-bin/carddisp.pl?gene=COMMD1</a>   |
| GUCA1A  | Guanylate<br>Cyclase<br>Activator 1A                                           | Protein<br>Coding | 43 | GC06P0553<br>95 | 9.106963 | <a href="https://www.genecards.org/cgi-bin/carddisp.pl?gene=GUCA1A">https://www.genecards.org/cgi-bin/carddisp.pl?gene=GUCA1A</a>   |
| CYP11B1 | Cytochrome<br>P450 Family 11<br>Subfamily B<br>Member 1                        | Protein<br>Coding | 50 | GC08M142<br>872 | 9.10541  | <a href="https://www.genecards.org/cgi-bin/carddisp.pl?gene=CYP11B1">https://www.genecards.org/cgi-bin/carddisp.pl?gene=CYP11B1</a> |
| UQCRC1  | Ubiquinol-<br>Cytochrome C<br>Reductase Core<br>Protein 1                      | Protein<br>Coding | 44 | GC03M048<br>598 | 9.099617 | <a href="https://www.genecards.org/cgi-bin/carddisp.pl?gene=UQCRC1">https://www.genecards.org/cgi-bin/carddisp.pl?gene=UQCRC1</a>   |
| KDM6A   | Lysine<br>Demethylase<br>6A                                                    | Protein<br>Coding | 47 | GC0XP0448<br>73 | 9.097195 | <a href="https://www.genecards.org/cgi-bin/carddisp.pl?gene=KDM6A">https://www.genecards.org/cgi-bin/carddisp.pl?gene=KDM6A</a>     |
| ALCAM   | Activated<br>Leukocyte Cell<br>Adhesion<br>Molecule                            | Protein<br>Coding | 43 | GC03P1053<br>66 | 9.088394 | <a href="https://www.genecards.org/cgi-bin/carddisp.pl?gene=ALCAM">https://www.genecards.org/cgi-bin/carddisp.pl?gene=ALCAM</a>     |
| CLPX    | Caseinolytic<br>Mitochondrial<br>Matrix<br>Peptidase<br>Chaperone<br>Subunit X | Protein<br>Coding | 41 | GC15M065<br>148 | 9.085342 | <a href="https://www.genecards.org/cgi-bin/carddisp.pl?gene=CLPX">https://www.genecards.org/cgi-bin/carddisp.pl?gene=CLPX</a>       |
| CBR1    | Carbonyl<br>Reductase 1                                                        | Protein<br>Coding | 47 | GC21P0360<br>69 | 9.084871 | <a href="https://www.genecards.org/cgi-bin/carddisp.pl?gene=CBR1">https://www.genecards.org/cgi-bin/carddisp.pl?gene=CBR1</a>       |
| SF3B4   | Splicing Factor<br>3b Subunit 4                                                | Protein<br>Coding | 44 | GC01M149<br>923 | 9.082061 | <a href="https://www.genecards.org/cgi-bin/carddisp.pl?gene=SF3B4">https://www.genecards.org/cgi-bin/carddisp.pl?gene=SF3B4</a>     |
| LHCGR   | Luteinizing<br>Hormone/Chor<br>iogonadotropin<br>Receptor                      | Protein<br>Coding | 48 | GC02M048<br>686 | 9.080131 | <a href="https://www.genecards.org/cgi-bin/carddisp.pl?gene=LHCGR">https://www.genecards.org/cgi-bin/carddisp.pl?gene=LHCGR</a>     |

|           |                                                    |                |    |             |          |                                                                                                                                         |
|-----------|----------------------------------------------------|----------------|----|-------------|----------|-----------------------------------------------------------------------------------------------------------------------------------------|
| EEF1A1    | Eukaryotic Translation Elongation Factor 1 Alpha 1 | Protein Coding | 44 | GC06M073515 | 9.069714 | <a href="https://www.genecards.org/cgi-bin/carddisp.pl?gene=EEF1A1">https://www.genecards.org/cgi-bin/carddisp.pl?gene=EEF1A1</a>       |
| NR2F2     | Nuclear Receptor Subfamily 2 Group F Member 2      | Protein Coding | 50 | GC15P096325 | 9.065069 | <a href="https://www.genecards.org/cgi-bin/carddisp.pl?gene=NR2F2">https://www.genecards.org/cgi-bin/carddisp.pl?gene=NR2F2</a>         |
| SLC33A1   | Solute Carrier Family 33 Member 1                  | Protein Coding | 44 | GC03M155821 | 9.061843 | <a href="https://www.genecards.org/cgi-bin/carddisp.pl?gene=SLC33A1">https://www.genecards.org/cgi-bin/carddisp.pl?gene=SLC33A1</a>     |
| GIP       | Gastric Inhibitory Polypeptide                     | Protein Coding | 40 | GC17M048958 | 9.061798 | <a href="https://www.genecards.org/cgi-bin/carddisp.pl?gene=GIP">https://www.genecards.org/cgi-bin/carddisp.pl?gene=GIP</a>             |
| RANBP2    | RAN Binding Protein 2                              | Protein Coding | 46 | GC02P108719 | 9.060944 | <a href="https://www.genecards.org/cgi-bin/carddisp.pl?gene=RANBP2">https://www.genecards.org/cgi-bin/carddisp.pl?gene=RANBP2</a>       |
| COL13A1   | Collagen Type XIII Alpha 1 Chain                   | Protein Coding | 41 | GC10P069801 | 9.056405 | <a href="https://www.genecards.org/cgi-bin/carddisp.pl?gene=COL13A1">https://www.genecards.org/cgi-bin/carddisp.pl?gene=COL13A1</a>     |
| CCL26     | C-C Motif Chemokine Ligand 26                      | Protein Coding | 38 | GC07M075769 | 9.055018 | <a href="https://www.genecards.org/cgi-bin/carddisp.pl?gene=CCL26">https://www.genecards.org/cgi-bin/carddisp.pl?gene=CCL26</a>         |
| NANOG     | Nanog Homeobox                                     | Protein Coding | 40 | GC12P007787 | 9.053321 | <a href="https://www.genecards.org/cgi-bin/carddisp.pl?gene=NANOG">https://www.genecards.org/cgi-bin/carddisp.pl?gene=NANOG</a>         |
| MSMO1     | Methylsterol Monooxygenase 1                       | Protein Coding | 44 | GC04P165327 | 9.04858  | <a href="https://www.genecards.org/cgi-bin/carddisp.pl?gene=MSMO1">https://www.genecards.org/cgi-bin/carddisp.pl?gene=MSMO1</a>         |
| ZC4H2     | Zinc Finger C4H2-Type Containing                   | Protein Coding | 37 | GC0XM064915 | 9.047223 | <a href="https://www.genecards.org/cgi-bin/carddisp.pl?gene=ZC4H2">https://www.genecards.org/cgi-bin/carddisp.pl?gene=ZC4H2</a>         |
| HNF1A-AS1 | HNF1A Antisense RNA 1                              | RNA Gene       | 19 | GC12M121474 | 9.047003 | <a href="https://www.genecards.org/cgi-bin/carddisp.pl?gene=HNF1A-AS1">https://www.genecards.org/cgi-bin/carddisp.pl?gene=HNF1A-AS1</a> |
| KIFBP     | Kinesin Family Binding Protein                     | Protein Coding | 30 | GC10P068990 | 9.041518 | <a href="https://www.genecards.org/cgi-bin/carddisp.pl?gene=KIFBP">https://www.genecards.org/cgi-bin/carddisp.pl?gene=KIFBP</a>         |
| TUFM      | Tu Translation Elongation Factor, Mitochondrial    | Protein Coding | 45 | GC16M029277 | 9.039992 | <a href="https://www.genecards.org/cgi-bin/carddisp.pl?gene=TUFM">https://www.genecards.org/cgi-bin/carddisp.pl?gene=TUFM</a>           |
| RACK1     | Receptor For Activated C Kinase 1                  | Protein Coding | 38 | GC05M181374 | 9.031844 | <a href="https://www.genecards.org/cgi-bin/carddisp.pl?gene=RACK1">https://www.genecards.org/cgi-bin/carddisp.pl?gene=RACK1</a>         |
| HSPA1B    | Heat Shock Protein Family A (Hsp70) Member 1B      | Protein Coding | 40 | GC06P055218 | 9.030623 | <a href="https://www.genecards.org/cgi-bin/carddisp.pl?gene=HSPA1B">https://www.genecards.org/cgi-bin/carddisp.pl?gene=HSPA1B</a>       |
| MIR455    | MicroRNA 455                                       | RNA Gene       | 18 | GC09P114209 | 9.027328 | <a href="https://www.genecards.org/cgi-bin/carddisp.pl?gene=MIR455">https://www.genecards.org/cgi-bin/carddisp.pl?gene=MIR455</a>       |
| APEH      | Acylaminoacyl-Peptide Hydrolase                    | Protein Coding | 41 | GC03P049673 | 9.024514 | <a href="https://www.genecards.org/cgi-bin/carddisp.pl?gene=APEH">https://www.genecards.org/cgi-bin/carddisp.pl?gene=APEH</a>           |
| TNC       | Tenascin C                                         | Protein Coding | 50 | GC09M115019 | 9.021313 | <a href="https://www.genecards.org/cgi-bin/carddisp.pl?gene=TNC">https://www.genecards.org/cgi-bin/carddisp.pl?gene=TNC</a>             |
| DOLK      | Dolichol Kinase                                    | Protein Coding | 39 | GC09M128945 | 9.017328 | <a href="https://www.genecards.org/cgi-bin/carddisp.pl?gene=DOLK">https://www.genecards.org/cgi-bin/carddisp.pl?gene=DOLK</a>           |

|         |                                                |                |    |             |          |                                                                                                                                     |
|---------|------------------------------------------------|----------------|----|-------------|----------|-------------------------------------------------------------------------------------------------------------------------------------|
| COASY   | Coenzyme A Synthase                            | Protein Coding | 46 | GC17P042561 | 9.011848 | <a href="https://www.genecards.org/cgi-bin/carddisp.pl?gene=COASY">https://www.genecards.org/cgi-bin/carddisp.pl?gene=COASY</a>     |
| RAD50   | RAD50 Double Strand Break Repair Protein       | Protein Coding | 50 | GC05P132556 | 9.00979  | <a href="https://www.genecards.org/cgi-bin/carddisp.pl?gene=RAD50">https://www.genecards.org/cgi-bin/carddisp.pl?gene=RAD50</a>     |
| RPS15   | Ribosomal Protein S15                          | Protein Coding | 41 | GC19P001438 | 8.997669 | <a href="https://www.genecards.org/cgi-bin/carddisp.pl?gene=RPS15">https://www.genecards.org/cgi-bin/carddisp.pl?gene=RPS15</a>     |
| PI3     | Peptidase Inhibitor 3 Proteasome               | Protein Coding | 40 | GC20P045174 | 8.994905 | <a href="https://www.genecards.org/cgi-bin/carddisp.pl?gene=PI3">https://www.genecards.org/cgi-bin/carddisp.pl?gene=PI3</a>         |
| PSMD4   | 26S Subunit Ubiquitin Receptor, Non-ATPase 4   | Protein Coding | 44 | GC01P151256 | 8.979827 | <a href="https://www.genecards.org/cgi-bin/carddisp.pl?gene=PSMD4">https://www.genecards.org/cgi-bin/carddisp.pl?gene=PSMD4</a>     |
| WDR62   | WD Repeat Domain 62                            | Protein Coding | 38 | GC19P036054 | 8.971237 | <a href="https://www.genecards.org/cgi-bin/carddisp.pl?gene=WDR62">https://www.genecards.org/cgi-bin/carddisp.pl?gene=WDR62</a>     |
| FRRS1L  | Ferric Chelate Reductase 1 Like                | Protein Coding | 34 | GC09M109130 | 8.967488 | <a href="https://www.genecards.org/cgi-bin/carddisp.pl?gene=FRRS1L">https://www.genecards.org/cgi-bin/carddisp.pl?gene=FRRS1L</a>   |
| ARRB2   | Arrestin Beta 2                                | Protein Coding | 45 | GC17P004711 | 8.957425 | <a href="https://www.genecards.org/cgi-bin/carddisp.pl?gene=ARRB2">https://www.genecards.org/cgi-bin/carddisp.pl?gene=ARRB2</a>     |
| SLC3A1  | Solute Carrier Family 3 Member 1 Signaling     | Protein Coding | 48 | GC02P044275 | 8.952633 | <a href="https://www.genecards.org/cgi-bin/carddisp.pl?gene=SLC3A1">https://www.genecards.org/cgi-bin/carddisp.pl?gene=SLC3A1</a>   |
| STRA6   | Receptor And Transporter Of Retinol STRA6      | Protein Coding | 41 | GC15M074179 | 8.944153 | <a href="https://www.genecards.org/cgi-bin/carddisp.pl?gene=STRA6">https://www.genecards.org/cgi-bin/carddisp.pl?gene=STRA6</a>     |
| NUP160  | Nucleoporin 160                                | Protein Coding | 40 | GC11M069013 | 8.94405  | <a href="https://www.genecards.org/cgi-bin/carddisp.pl?gene=NUP160">https://www.genecards.org/cgi-bin/carddisp.pl?gene=NUP160</a>   |
| PIK3R4  | Phosphoinositide-3-Kinase Regulatory Subunit 4 | Protein Coding | 47 | GC03M130678 | 8.943337 | <a href="https://www.genecards.org/cgi-bin/carddisp.pl?gene=PIK3R4">https://www.genecards.org/cgi-bin/carddisp.pl?gene=PIK3R4</a>   |
| RPS6KA1 | Ribosomal Protein S6 Kinase A1                 | Protein Coding | 51 | GC01P026540 | 8.932425 | <a href="https://www.genecards.org/cgi-bin/carddisp.pl?gene=RPS6KA1">https://www.genecards.org/cgi-bin/carddisp.pl?gene=RPS6KA1</a> |
| PER1    | Period Circadian Regulator 1                   | Protein Coding | 43 | GC17M009186 | 8.924578 | <a href="https://www.genecards.org/cgi-bin/carddisp.pl?gene=PER1">https://www.genecards.org/cgi-bin/carddisp.pl?gene=PER1</a>       |
| DDR2    | Discoidin Domain Receptor Tyrosine Kinase 2    | Protein Coding | 51 | GC01P162631 | 8.920695 | <a href="https://www.genecards.org/cgi-bin/carddisp.pl?gene=DDR2">https://www.genecards.org/cgi-bin/carddisp.pl?gene=DDR2</a>       |
| TRAP1   | TNF Receptor Associated Protein 1              | Protein Coding | 44 | GC16M003667 | 8.918041 | <a href="https://www.genecards.org/cgi-bin/carddisp.pl?gene=TRAP1">https://www.genecards.org/cgi-bin/carddisp.pl?gene=TRAP1</a>     |
| SLC34A2 | Solute Carrier Family 34 Member 2              | Protein Coding | 47 | GC04P025657 | 8.91736  | <a href="https://www.genecards.org/cgi-bin/carddisp.pl?gene=SLC34A2">https://www.genecards.org/cgi-bin/carddisp.pl?gene=SLC34A2</a> |
| FTCD    | Formimidoyltransferase Cyclodeaminase          | Protein Coding | 44 | GC21M048321 | 8.912099 | <a href="https://www.genecards.org/cgi-bin/carddisp.pl?gene=FTCD">https://www.genecards.org/cgi-bin/carddisp.pl?gene=FTCD</a>       |
| KIF11   | Kinesin Family Member 11                       | Protein Coding | 48 | GC10P092574 | 8.90839  | <a href="https://www.genecards.org/cgi-bin/carddisp.pl?gene=KIF11">https://www.genecards.org/cgi-bin/carddisp.pl?gene=KIF11</a>     |

|          |                                                                         |                |    |             |          |                                                                                                                                       |
|----------|-------------------------------------------------------------------------|----------------|----|-------------|----------|---------------------------------------------------------------------------------------------------------------------------------------|
| APOBEC3G | Apolipoprotein B MRNA Editing Enzyme Catalytic Subunit 3G               | Protein Coding | 42 | GC22P039078 | 8.903831 | <a href="https://www.genecards.org/cgi-bin/carddisp.pl?gene=APOBEC3G">https://www.genecards.org/cgi-bin/carddisp.pl?gene=APOBEC3G</a> |
| CTNND1   | Catenin Delta 1                                                         | Protein Coding | 46 | GC11P057879 | 8.90342  | <a href="https://www.genecards.org/cgi-bin/carddisp.pl?gene=CTNND1">https://www.genecards.org/cgi-bin/carddisp.pl?gene=CTNND1</a>     |
| AIMP2    | Aminoacyl TRNA Synthetase Complex Interacting Multifunctional Protein 2 | Protein Coding | 42 | GC07P006016 | 8.902922 | <a href="https://www.genecards.org/cgi-bin/carddisp.pl?gene=AIMP2">https://www.genecards.org/cgi-bin/carddisp.pl?gene=AIMP2</a>       |
| POLB     | DNA Polymerase Beta                                                     | Protein Coding | 47 | GC08P042338 | 8.895884 | <a href="https://www.genecards.org/cgi-bin/carddisp.pl?gene=POLB">https://www.genecards.org/cgi-bin/carddisp.pl?gene=POLB</a>         |
| PPP2R5D  | Protein Phosphatase 2 Regulatory Subunit B'Delta                        | Protein Coding | 46 | GC06P055406 | 8.895657 | <a href="https://www.genecards.org/cgi-bin/carddisp.pl?gene=PPP2R5D">https://www.genecards.org/cgi-bin/carddisp.pl?gene=PPP2R5D</a>   |
| TFAP2B   | Transcription Factor AP-2 Beta                                          | Protein Coding | 45 | GC06P055469 | 8.890379 | <a href="https://www.genecards.org/cgi-bin/carddisp.pl?gene=TFAP2B">https://www.genecards.org/cgi-bin/carddisp.pl?gene=TFAP2B</a>     |
| MMADHC   | Metabolism Of Cobalamin Associated D                                    | Protein Coding | 43 | GC02M149569 | 8.887528 | <a href="https://www.genecards.org/cgi-bin/carddisp.pl?gene=MMADHC">https://www.genecards.org/cgi-bin/carddisp.pl?gene=MMADHC</a>     |
| RPSA     | Ribosomal Protein SA                                                    | Protein Coding | 45 | GC03P039406 | 8.886271 | <a href="https://www.genecards.org/cgi-bin/carddisp.pl?gene=RPSA">https://www.genecards.org/cgi-bin/carddisp.pl?gene=RPSA</a>         |
| CAPN2    | Calpain 2                                                               | Protein Coding | 48 | GC01P223701 | 8.885628 | <a href="https://www.genecards.org/cgi-bin/carddisp.pl?gene=CAPN2">https://www.genecards.org/cgi-bin/carddisp.pl?gene=CAPN2</a>       |
| SALL4    | Spalt Like Transcription Factor 4                                       | Protein Coding | 44 | GC20M051784 | 8.873285 | <a href="https://www.genecards.org/cgi-bin/carddisp.pl?gene=SALL4">https://www.genecards.org/cgi-bin/carddisp.pl?gene=SALL4</a>       |
| TNFRSF4  | TNF Receptor Superfamily Member 4                                       | Protein Coding | 43 | GC01M001211 | 8.872699 | <a href="https://www.genecards.org/cgi-bin/carddisp.pl?gene=TNFRSF4">https://www.genecards.org/cgi-bin/carddisp.pl?gene=TNFRSF4</a>   |
| MEGF8    | Multiple EGF Like Domains 8                                             | Protein Coding | 37 | GC19P042325 | 8.867714 | <a href="https://www.genecards.org/cgi-bin/carddisp.pl?gene=MEGF8">https://www.genecards.org/cgi-bin/carddisp.pl?gene=MEGF8</a>       |
| DCX      | Doublecortin                                                            | Protein Coding | 46 | GC0XM111293 | 8.864035 | <a href="https://www.genecards.org/cgi-bin/carddisp.pl?gene=DCX">https://www.genecards.org/cgi-bin/carddisp.pl?gene=DCX</a>           |
| TRIP4    | Thyroid Hormone Receptor Interactor 4                                   | Protein Coding | 41 | GC15P077081 | 8.862574 | <a href="https://www.genecards.org/cgi-bin/carddisp.pl?gene=TRIP4">https://www.genecards.org/cgi-bin/carddisp.pl?gene=TRIP4</a>       |
| PDHB     | Pyruvate Dehydrogenase E1 Subunit Beta                                  | Protein Coding | 47 | GC03M058428 | 8.859496 | <a href="https://www.genecards.org/cgi-bin/carddisp.pl?gene=PDHB">https://www.genecards.org/cgi-bin/carddisp.pl?gene=PDHB</a>         |
| WDR26    | WD Repeat Domain 26                                                     | Protein Coding | 41 | GC01M224385 | 8.853918 | <a href="https://www.genecards.org/cgi-bin/carddisp.pl?gene=WDR26">https://www.genecards.org/cgi-bin/carddisp.pl?gene=WDR26</a>       |
| NT5C2    | 5'-Nucleotidase, Cytosolic II                                           | Protein Coding | 47 | GC10M103088 | 8.849819 | <a href="https://www.genecards.org/cgi-bin/carddisp.pl?gene=NT5C2">https://www.genecards.org/cgi-bin/carddisp.pl?gene=NT5C2</a>       |

|              |                                                       |                |    |             |          |                                                                                                                                               |
|--------------|-------------------------------------------------------|----------------|----|-------------|----------|-----------------------------------------------------------------------------------------------------------------------------------------------|
| BCL11B       | BAF Chromatin Remodeling Complex Subunit BCL11B       | Protein Coding | 43 | GC14M099169 | 8.849645 | <a href="https://www.genecards.org/cgi-bin/carddisp.pl?gene=BCL11B">https://www.genecards.org/cgi-bin/carddisp.pl?gene=BCL11B</a>             |
| PRKACG       | Protein Kinase CAMP-Activated Catalytic Subunit Gamma | Protein Coding | 48 | GC09M069013 | 8.848991 | <a href="https://www.genecards.org/cgi-bin/carddisp.pl?gene=PRKACG">https://www.genecards.org/cgi-bin/carddisp.pl?gene=PRKACG</a>             |
| CHKB         | Choline Kinase Beta                                   | Protein Coding | 46 | GC22M050578 | 8.848111 | <a href="https://www.genecards.org/cgi-bin/carddisp.pl?gene=CHKB">https://www.genecards.org/cgi-bin/carddisp.pl?gene=CHKB</a>                 |
| RAD51L3-RFFL | RAD51L3-RFFL Readthrough                              | RNA Gene       | 9  | GC17M035009 | 8.848001 | <a href="https://www.genecards.org/cgi-bin/carddisp.pl?gene=RAD51L3-RFFL">https://www.genecards.org/cgi-bin/carddisp.pl?gene=RAD51L3-RFFL</a> |
| CSNK1D       | Casein Kinase 1 Delta                                 | Protein Coding | 51 | GC17M082239 | 8.847673 | <a href="https://www.genecards.org/cgi-bin/carddisp.pl?gene=CSNK1D">https://www.genecards.org/cgi-bin/carddisp.pl?gene=CSNK1D</a>             |
| TLR8         | Toll Like Receptor 8                                  | Protein Coding | 48 | GC0XP012924 | 8.847321 | <a href="https://www.genecards.org/cgi-bin/carddisp.pl?gene=TLR8">https://www.genecards.org/cgi-bin/carddisp.pl?gene=TLR8</a>                 |
| RNASE1       | Ribonuclease A Family Member 1, Pancreatic            | Protein Coding | 40 | GC14M020801 | 8.847293 | <a href="https://www.genecards.org/cgi-bin/carddisp.pl?gene=RNASE1">https://www.genecards.org/cgi-bin/carddisp.pl?gene=RNASE1</a>             |
| HDAC5        | Histone Deacetylase 5 Succinyl-CoA:Glutarate-CoA      | Protein Coding | 48 | GC17M044076 | 8.844287 | <a href="https://www.genecards.org/cgi-bin/carddisp.pl?gene=HDAC5">https://www.genecards.org/cgi-bin/carddisp.pl?gene=HDAC5</a>               |
| SUGCT        | Transferase Ubiquitin                                 | Protein Coding | 37 | GC07P040134 | 8.842239 | <a href="https://www.genecards.org/cgi-bin/carddisp.pl?gene=SUGCT">https://www.genecards.org/cgi-bin/carddisp.pl?gene=SUGCT</a>               |
| UBR1         | Protein Ligase E3 Component N-Recognin 1              | Protein Coding | 44 | GC15M042942 | 8.840374 | <a href="https://www.genecards.org/cgi-bin/carddisp.pl?gene=UBR1">https://www.genecards.org/cgi-bin/carddisp.pl?gene=UBR1</a>                 |
| HESX1        | HESX Homeobox 1 Structural Maintenance Of             | Protein Coding | 40 | GC03M057207 | 8.838783 | <a href="https://www.genecards.org/cgi-bin/carddisp.pl?gene=HESX1">https://www.genecards.org/cgi-bin/carddisp.pl?gene=HESX1</a>               |
| SMCHD1       | Chromosomes Flexible Hinge Domain Containing 1        | Protein Coding | 41 | GC18P002649 | 8.837733 | <a href="https://www.genecards.org/cgi-bin/carddisp.pl?gene=SMCHD1">https://www.genecards.org/cgi-bin/carddisp.pl?gene=SMCHD1</a>             |
| PYCR1        | Pyrroline-5-Carboxylate Reductase 1 Potassium         | Protein Coding | 48 | GC17M081932 | 8.836712 | <a href="https://www.genecards.org/cgi-bin/carddisp.pl?gene=PYCR1">https://www.genecards.org/cgi-bin/carddisp.pl?gene=PYCR1</a>               |
| KCNH1        | Voltage-Gated Channel Subfamily H Member 1            | Protein Coding | 47 | GC01M210678 | 8.835409 | <a href="https://www.genecards.org/cgi-bin/carddisp.pl?gene=KCNH1">https://www.genecards.org/cgi-bin/carddisp.pl?gene=KCNH1</a>               |
| FOLR1        | Folate Receptor Alpha                                 | Protein Coding | 47 | GC11P072190 | 8.835241 | <a href="https://www.genecards.org/cgi-bin/carddisp.pl?gene=FOLR1">https://www.genecards.org/cgi-bin/carddisp.pl?gene=FOLR1</a>               |
| EDA          | Ectodysplasin A                                       | Protein Coding | 41 | GC0XP069618 | 8.831638 | <a href="https://www.genecards.org/cgi-bin/carddisp.pl?gene=EDA">https://www.genecards.org/cgi-bin/carddisp.pl?gene=EDA</a>                   |



|          |                                                                  |                |    |             |          |                                                                                                                                       |
|----------|------------------------------------------------------------------|----------------|----|-------------|----------|---------------------------------------------------------------------------------------------------------------------------------------|
| GLO1     | Glyoxalase I                                                     | Protein Coding | 47 | GC06M047047 | 8.830947 | <a href="https://www.genecards.org/cgi-bin/carddisp.pl?gene=GLO1">https://www.genecards.org/cgi-bin/carddisp.pl?gene=GLO1</a>         |
| MUC4     | Mucin 4, Cell Surface Associated                                 | Protein Coding | 38 | GC03M195746 | 8.830017 | <a href="https://www.genecards.org/cgi-bin/carddisp.pl?gene=MUC4">https://www.genecards.org/cgi-bin/carddisp.pl?gene=MUC4</a>         |
| SERPINB1 | Serpin Family B Member 1                                         | Protein Coding | 40 | GC06M002833 | 8.82894  | <a href="https://www.genecards.org/cgi-bin/carddisp.pl?gene=SERPINB1">https://www.genecards.org/cgi-bin/carddisp.pl?gene=SERPINB1</a> |
| VAC14    | VAC14 Component Of PIKFYVE Complex                               | Protein Coding | 43 | GC16M070688 | 8.824135 | <a href="https://www.genecards.org/cgi-bin/carddisp.pl?gene=VAC14">https://www.genecards.org/cgi-bin/carddisp.pl?gene=VAC14</a>       |
| TDGF1    | Teratocarcinoma-Derived Growth Factor 1                          | Protein Coding | 42 | GC03P046576 | 8.823638 | <a href="https://www.genecards.org/cgi-bin/carddisp.pl?gene=TDGF1">https://www.genecards.org/cgi-bin/carddisp.pl?gene=TDGF1</a>       |
| SIRT6    | Sirtuin 6                                                        | Protein Coding | 47 | GC19M004174 | 8.816259 | <a href="https://www.genecards.org/cgi-bin/carddisp.pl?gene=SIRT6">https://www.genecards.org/cgi-bin/carddisp.pl?gene=SIRT6</a>       |
| HDGF     | Heparin Binding Growth Factor                                    | Protein Coding | 41 | GC01M156786 | 8.814076 | <a href="https://www.genecards.org/cgi-bin/carddisp.pl?gene=HDGF">https://www.genecards.org/cgi-bin/carddisp.pl?gene=HDGF</a>         |
| ATG7     | Autophagy Related 7                                              | Protein Coding | 43 | GC03P011273 | 8.813376 | <a href="https://www.genecards.org/cgi-bin/carddisp.pl?gene=ATG7">https://www.genecards.org/cgi-bin/carddisp.pl?gene=ATG7</a>         |
| ARNT     | Aryl Hydrocarbon Receptor Nuclear Translocator                   | Protein Coding | 44 | GC01M150809 | 8.808784 | <a href="https://www.genecards.org/cgi-bin/carddisp.pl?gene=ARNT">https://www.genecards.org/cgi-bin/carddisp.pl?gene=ARNT</a>         |
| MCU      | Mitochondrial Calcium Uniporter                                  | Protein Coding | 37 | GC10P072692 | 8.804451 | <a href="https://www.genecards.org/cgi-bin/carddisp.pl?gene=MCU">https://www.genecards.org/cgi-bin/carddisp.pl?gene=MCU</a>           |
| TRAF2    | TNF Receptor Associated Factor 2                                 | Protein Coding | 45 | GC09P136881 | 8.803548 | <a href="https://www.genecards.org/cgi-bin/carddisp.pl?gene=TRAF2">https://www.genecards.org/cgi-bin/carddisp.pl?gene=TRAF2</a>       |
| NCAN     | Neurocan                                                         | Protein Coding | 41 | GC19P026662 | 8.800243 | <a href="https://www.genecards.org/cgi-bin/carddisp.pl?gene=NCAN">https://www.genecards.org/cgi-bin/carddisp.pl?gene=NCAN</a>         |
| HLA-DMA  | Major Histocompatibility Complex, Class II, DM Alpha             | Protein Coding | 41 | GC06M046951 | 8.792204 | <a href="https://www.genecards.org/cgi-bin/carddisp.pl?gene=HLA-DMA">https://www.genecards.org/cgi-bin/carddisp.pl?gene=HLA-DMA</a>   |
| TP53BP1  | Tumor Protein P53 Binding Protein 1                              | Protein Coding | 45 | GC15M043403 | 8.791351 | <a href="https://www.genecards.org/cgi-bin/carddisp.pl?gene=TP53BP1">https://www.genecards.org/cgi-bin/carddisp.pl?gene=TP53BP1</a>   |
| DGKQ     | Diacylglycerol Kinase Theta                                      | Protein Coding | 43 | GC04M000942 | 8.791092 | <a href="https://www.genecards.org/cgi-bin/carddisp.pl?gene=DGKQ">https://www.genecards.org/cgi-bin/carddisp.pl?gene=DGKQ</a>         |
| PLIN3    | Perilipin 3                                                      | Protein Coding | 41 | GC19M004839 | 8.781133 | <a href="https://www.genecards.org/cgi-bin/carddisp.pl?gene=PLIN3">https://www.genecards.org/cgi-bin/carddisp.pl?gene=PLIN3</a>       |
| TRPM7    | Transient Receptor Potential Cation Channel Subfamily M Member 7 | Protein Coding | 46 | GC15M050552 | 8.781031 | <a href="https://www.genecards.org/cgi-bin/carddisp.pl?gene=TRPM7">https://www.genecards.org/cgi-bin/carddisp.pl?gene=TRPM7</a>       |
| NHLRC2   | NHL Repeat Containing 2                                          | Protein Coding | 36 | GC10P113854 | 8.777525 | <a href="https://www.genecards.org/cgi-bin/carddisp.pl?gene=NHLRC2">https://www.genecards.org/cgi-bin/carddisp.pl?gene=NHLRC2</a>     |

|         |                                                                             |                |    |             |          |                                                                                                                                     |
|---------|-----------------------------------------------------------------------------|----------------|----|-------------|----------|-------------------------------------------------------------------------------------------------------------------------------------|
| SLC4A4  | Solute Carrier Family 4 Member 4                                            | Protein Coding | 47 | GC04P071063 | 8.773716 | <a href="https://www.genecards.org/cgi-bin/carddisp.pl?gene=SLC4A4">https://www.genecards.org/cgi-bin/carddisp.pl?gene=SLC4A4</a>   |
| SPHK1   | Sphingosine Kinase 1                                                        | Protein Coding | 48 | GC17P076376 | 8.765442 | <a href="https://www.genecards.org/cgi-bin/carddisp.pl?gene=SPHK1">https://www.genecards.org/cgi-bin/carddisp.pl?gene=SPHK1</a>     |
| FOSL1   | FOS Like 1, AP-1 Transcription Factor Subunit                               | Protein Coding | 45 | GC11M069434 | 8.754175 | <a href="https://www.genecards.org/cgi-bin/carddisp.pl?gene=FOSL1">https://www.genecards.org/cgi-bin/carddisp.pl?gene=FOSL1</a>     |
| PPIA    | Peptidylprolyl Isomerase A                                                  | Protein Coding | 48 | GC07P044807 | 8.749454 | <a href="https://www.genecards.org/cgi-bin/carddisp.pl?gene=PPIA">https://www.genecards.org/cgi-bin/carddisp.pl?gene=PPIA</a>       |
| GATAD2B | GATA Zinc Finger Domain Containing 2B                                       | Protein Coding | 43 | GC01M153805 | 8.748327 | <a href="https://www.genecards.org/cgi-bin/carddisp.pl?gene=GATAD2B">https://www.genecards.org/cgi-bin/carddisp.pl?gene=GATAD2B</a> |
| SPECC1L | Sperm Antigen With Calponin Homology And Coiled-Coil Domains 1 Like RAB11A, | Protein Coding | 38 | GC22P026707 | 8.74824  | <a href="https://www.genecards.org/cgi-bin/carddisp.pl?gene=SPECC1L">https://www.genecards.org/cgi-bin/carddisp.pl?gene=SPECC1L</a> |
| RAB11A  | Member RAS Oncogene Family                                                  | Protein Coding | 48 | GC15P077096 | 8.747763 | <a href="https://www.genecards.org/cgi-bin/carddisp.pl?gene=RAB11A">https://www.genecards.org/cgi-bin/carddisp.pl?gene=RAB11A</a>   |
| ADRA2B  | Adrenoceptor Alpha 2B                                                       | Protein Coding | 47 | GC02M096112 | 8.740982 | <a href="https://www.genecards.org/cgi-bin/carddisp.pl?gene=ADRA2B">https://www.genecards.org/cgi-bin/carddisp.pl?gene=ADRA2B</a>   |
| CH25H   | Cholesterol 25-Hydroxylase                                                  | Protein Coding | 37 | GC10M089205 | 8.74045  | <a href="https://www.genecards.org/cgi-bin/carddisp.pl?gene=CH25H">https://www.genecards.org/cgi-bin/carddisp.pl?gene=CH25H</a>     |
| RGN     | Regucalcin                                                                  | Protein Coding | 40 | GC0XP047189 | 8.73871  | <a href="https://www.genecards.org/cgi-bin/carddisp.pl?gene=RGN">https://www.genecards.org/cgi-bin/carddisp.pl?gene=RGN</a>         |
| AZU1    | Azurocidin 1                                                                | Protein Coding | 40 | GC19P000825 | 8.734966 | <a href="https://www.genecards.org/cgi-bin/carddisp.pl?gene=AZU1">https://www.genecards.org/cgi-bin/carddisp.pl?gene=AZU1</a>       |
| ZIC2    | Zic Family Member 2                                                         | Protein Coding | 44 | GC13P099981 | 8.733965 | <a href="https://www.genecards.org/cgi-bin/carddisp.pl?gene=ZIC2">https://www.genecards.org/cgi-bin/carddisp.pl?gene=ZIC2</a>       |
| FCGR1A  | Fc Fragment Of IgG Receptor Ia                                              | Protein Coding | 42 | GC01P149754 | 8.733392 | <a href="https://www.genecards.org/cgi-bin/carddisp.pl?gene=FCGR1A">https://www.genecards.org/cgi-bin/carddisp.pl?gene=FCGR1A</a>   |
| MIR502  | MicroRNA 502                                                                | RNA Gene       | 16 | GC0XP050014 | 8.726672 | <a href="https://www.genecards.org/cgi-bin/carddisp.pl?gene=MIR502">https://www.genecards.org/cgi-bin/carddisp.pl?gene=MIR502</a>   |
| ATG5    | Autophagy Related 5                                                         | Protein Coding | 44 | GC06M106045 | 8.725743 | <a href="https://www.genecards.org/cgi-bin/carddisp.pl?gene=ATG5">https://www.genecards.org/cgi-bin/carddisp.pl?gene=ATG5</a>       |
| FUCA2   | Alpha-L-Fucosidase 2                                                        | Protein Coding | 41 | GC06M143494 | 8.725465 | <a href="https://www.genecards.org/cgi-bin/carddisp.pl?gene=FUCA2">https://www.genecards.org/cgi-bin/carddisp.pl?gene=FUCA2</a>     |
| NR1D1   | Nuclear Receptor Subfamily 1 Group D Member 1                               | Protein Coding | 48 | GC17M040092 | 8.724136 | <a href="https://www.genecards.org/cgi-bin/carddisp.pl?gene=NR1D1">https://www.genecards.org/cgi-bin/carddisp.pl?gene=NR1D1</a>     |
| GJA8    | Gap Junction Protein Alpha 8                                                | Protein Coding | 45 | GC01P147902 | 8.71728  | <a href="https://www.genecards.org/cgi-bin/carddisp.pl?gene=GJA8">https://www.genecards.org/cgi-bin/carddisp.pl?gene=GJA8</a>       |
| DHODH   | Dihydroorotate Dehydrogenase (Quinone)                                      | Protein Coding | 46 | GC16P072008 | 8.713929 | <a href="https://www.genecards.org/cgi-bin/carddisp.pl?gene=DHODH">https://www.genecards.org/cgi-bin/carddisp.pl?gene=DHODH</a>     |
| DPEP1   | Dipeptidase 1                                                               | Protein Coding | 43 | GC16P089613 | 8.691988 | <a href="https://www.genecards.org/cgi-bin/carddisp.pl?gene=DPEP1">https://www.genecards.org/cgi-bin/carddisp.pl?gene=DPEP1</a>     |

|         |                                                        |                |    |             |          |                                                                                                                                     |
|---------|--------------------------------------------------------|----------------|----|-------------|----------|-------------------------------------------------------------------------------------------------------------------------------------|
| VAMP2   | Vesicle Associated Membrane Protein 2                  | Protein Coding | 44 | GC17M009187 | 8.682579 | <a href="https://www.genecards.org/cgi-bin/carddisp.pl?gene=VAMP2">https://www.genecards.org/cgi-bin/carddisp.pl?gene=VAMP2</a>     |
| TOP3A   | DNA Topoisomerase III Alpha                            | Protein Coding | 42 | GC17M018271 | 8.667412 | <a href="https://www.genecards.org/cgi-bin/carddisp.pl?gene=TOP3A">https://www.genecards.org/cgi-bin/carddisp.pl?gene=TOP3A</a>     |
| NPAS2   | Neuronal PAS Domain Protein 2                          | Protein Coding | 42 | GC02P100820 | 8.664587 | <a href="https://www.genecards.org/cgi-bin/carddisp.pl?gene=NPAS2">https://www.genecards.org/cgi-bin/carddisp.pl?gene=NPAS2</a>     |
| ERLIN2  | ER Lipid Raft Associated 2 HPS1 Biogenesis Of          | Protein Coding | 41 | GC08P037736 | 8.662991 | <a href="https://www.genecards.org/cgi-bin/carddisp.pl?gene=ERLIN2">https://www.genecards.org/cgi-bin/carddisp.pl?gene=ERLIN2</a>   |
| HPS1    | Lysosomal Organelles Complex 3 Subunit 1 Retinal G     | Protein Coding | 43 | GC10M098416 | 8.660741 | <a href="https://www.genecards.org/cgi-bin/carddisp.pl?gene=HPS1">https://www.genecards.org/cgi-bin/carddisp.pl?gene=HPS1</a>       |
| RGR     | Protein Coupled Receptor                               | Protein Coding | 43 | GC10P085402 | 8.643101 | <a href="https://www.genecards.org/cgi-bin/carddisp.pl?gene=RGR">https://www.genecards.org/cgi-bin/carddisp.pl?gene=RGR</a>         |
| PPIB    | Peptidylprolyl Isomerase B                             | Protein Coding | 50 | GC15M064155 | 8.639938 | <a href="https://www.genecards.org/cgi-bin/carddisp.pl?gene=PPIB">https://www.genecards.org/cgi-bin/carddisp.pl?gene=PPIB</a>       |
| APLP2   | Amyloid Beta Precursor Like Protein 2                  | Protein Coding | 43 | GC11P130069 | 8.637795 | <a href="https://www.genecards.org/cgi-bin/carddisp.pl?gene=APLP2">https://www.genecards.org/cgi-bin/carddisp.pl?gene=APLP2</a>     |
| SNX14   | Sorting Nexin 14                                       | Protein Coding | 39 | GC06M085505 | 8.632335 | <a href="https://www.genecards.org/cgi-bin/carddisp.pl?gene=SNX14">https://www.genecards.org/cgi-bin/carddisp.pl?gene=SNX14</a>     |
| MSN     | Moesin                                                 | Protein Coding | 48 | GC0XP065588 | 8.63151  | <a href="https://www.genecards.org/cgi-bin/carddisp.pl?gene=MSN">https://www.genecards.org/cgi-bin/carddisp.pl?gene=MSN</a>         |
| JUNB    | JunB Proto-Oncogene, AP-1 Transcription Factor Subunit | Protein Coding | 43 | GC19P012791 | 8.629303 | <a href="https://www.genecards.org/cgi-bin/carddisp.pl?gene=JUNB">https://www.genecards.org/cgi-bin/carddisp.pl?gene=JUNB</a>       |
| ARAF    | A-Raf Proto-Oncogene, Serine/Threonine Kinase          | Protein Coding | 47 | GC0XP047562 | 8.626293 | <a href="https://www.genecards.org/cgi-bin/carddisp.pl?gene=ARAF">https://www.genecards.org/cgi-bin/carddisp.pl?gene=ARAF</a>       |
| SGCG    | Sarcoglycan Gamma                                      | Protein Coding | 43 | GC13P023160 | 8.621014 | <a href="https://www.genecards.org/cgi-bin/carddisp.pl?gene=SGCG">https://www.genecards.org/cgi-bin/carddisp.pl?gene=SGCG</a>       |
| WNT10B  | Wnt Family Member 10B                                  | Protein Coding | 48 | GC12M048965 | 8.610108 | <a href="https://www.genecards.org/cgi-bin/carddisp.pl?gene=WNT10B">https://www.genecards.org/cgi-bin/carddisp.pl?gene=WNT10B</a>   |
| PSMA7   | Proteasome 20S Subunit Alpha 7                         | Protein Coding | 45 | GC20M062136 | 8.6087   | <a href="https://www.genecards.org/cgi-bin/carddisp.pl?gene=PSMA7">https://www.genecards.org/cgi-bin/carddisp.pl?gene=PSMA7</a>     |
| ALOX15B | Arachidonate 15-Lipoxygenase Type B                    | Protein Coding | 43 | GC17P008039 | 8.607839 | <a href="https://www.genecards.org/cgi-bin/carddisp.pl?gene=ALOX15B">https://www.genecards.org/cgi-bin/carddisp.pl?gene=ALOX15B</a> |
| GPNMB   | Glycoprotein Nmb                                       | Protein Coding | 44 | GC07P023238 | 8.607162 | <a href="https://www.genecards.org/cgi-bin/carddisp.pl?gene=GPNMB">https://www.genecards.org/cgi-bin/carddisp.pl?gene=GPNMB</a>     |
| ELK1    | ETS Transcription Factor ELK1                          | Protein Coding | 44 | GC0XM047635 | 8.606547 | <a href="https://www.genecards.org/cgi-bin/carddisp.pl?gene=ELK1">https://www.genecards.org/cgi-bin/carddisp.pl?gene=ELK1</a>       |

|         |                                                       |                   |    |                 |          |                                                                                                                                     |
|---------|-------------------------------------------------------|-------------------|----|-----------------|----------|-------------------------------------------------------------------------------------------------------------------------------------|
| PDSS2   | Decaprenyl<br>Diphosphate<br>Synthase<br>Subunit 2    | Protein<br>Coding | 41 | GC06M107<br>152 | 8.598368 | <a href="https://www.genecards.org/cgi-bin/carddisp.pl?gene=PDSS2">https://www.genecards.org/cgi-bin/carddisp.pl?gene=PDSS2</a>     |
| SRA1    | Steroid<br>Receptor RNA<br>Activator 1                | Protein<br>Coding | 38 | GC05M140<br>537 | 8.594357 | <a href="https://www.genecards.org/cgi-bin/carddisp.pl?gene=SRA1">https://www.genecards.org/cgi-bin/carddisp.pl?gene=SRA1</a>       |
| PADI4   | Peptidyl<br>Arginine<br>Deiminase 4                   | Protein<br>Coding | 44 | GC01P0173<br>08 | 8.591413 | <a href="https://www.genecards.org/cgi-bin/carddisp.pl?gene=PADI4">https://www.genecards.org/cgi-bin/carddisp.pl?gene=PADI4</a>     |
| CPLX1   | Complexin 1                                           | Protein<br>Coding | 43 | GC04M000<br>784 | 8.591339 | <a href="https://www.genecards.org/cgi-bin/carddisp.pl?gene=CPLX1">https://www.genecards.org/cgi-bin/carddisp.pl?gene=CPLX1</a>     |
| CSK     | C-Terminal Src<br>Kinase                              | Protein<br>Coding | 48 | GC15P0747<br>82 | 8.589247 | <a href="https://www.genecards.org/cgi-bin/carddisp.pl?gene=CSK">https://www.genecards.org/cgi-bin/carddisp.pl?gene=CSK</a>         |
| PAPPA   | Pappalysin 1                                          | Protein<br>Coding | 41 | GC09P1162<br>31 | 8.587589 | <a href="https://www.genecards.org/cgi-bin/carddisp.pl?gene=PAPPA">https://www.genecards.org/cgi-bin/carddisp.pl?gene=PAPPA</a>     |
| UGT8    | UDP<br>Glycosyltransfer<br>ase 8                      | Protein<br>Coding | 44 | GC04P1145<br>98 | 8.586639 | <a href="https://www.genecards.org/cgi-bin/carddisp.pl?gene=UGT8">https://www.genecards.org/cgi-bin/carddisp.pl?gene=UGT8</a>       |
| NRBF2   | Nuclear<br>Receptor<br>Binding Factor<br>2            | Protein<br>Coding | 39 | GC10P0631<br>33 | 8.582347 | <a href="https://www.genecards.org/cgi-bin/carddisp.pl?gene=NRBF2">https://www.genecards.org/cgi-bin/carddisp.pl?gene=NRBF2</a>     |
| SLC1A1  | Solute Carrier<br>Family 1<br>Member 1                | Protein<br>Coding | 48 | GC09P0044<br>90 | 8.58135  | <a href="https://www.genecards.org/cgi-bin/carddisp.pl?gene=SLC1A1">https://www.genecards.org/cgi-bin/carddisp.pl?gene=SLC1A1</a>   |
| CFD     | Complement<br>Factor D                                | Protein<br>Coding | 45 | GC19P0008<br>59 | 8.577744 | <a href="https://www.genecards.org/cgi-bin/carddisp.pl?gene=CFD">https://www.genecards.org/cgi-bin/carddisp.pl?gene=CFD</a>         |
| NARS1   | Asparaginyl-<br>tRNA<br>Synthetase 1                  | Protein<br>Coding | 36 | GC18M057<br>601 | 8.577522 | <a href="https://www.genecards.org/cgi-bin/carddisp.pl?gene=NARS1">https://www.genecards.org/cgi-bin/carddisp.pl?gene=NARS1</a>     |
| LSR     | Lipolysis<br>Stimulated<br>Lipoprotein<br>Receptor    | Protein<br>Coding | 41 | GC19P0403<br>43 | 8.573154 | <a href="https://www.genecards.org/cgi-bin/carddisp.pl?gene=LSR">https://www.genecards.org/cgi-bin/carddisp.pl?gene=LSR</a>         |
| ERFE    | Erythroferrone                                        | Protein<br>Coding | 24 | GC02P2381<br>59 | 8.57283  | <a href="https://www.genecards.org/cgi-bin/carddisp.pl?gene=ERFE">https://www.genecards.org/cgi-bin/carddisp.pl?gene=ERFE</a>       |
| CD5     | CD5 Molecule                                          | Protein<br>Coding | 41 | GC11P0611<br>14 | 8.570673 | <a href="https://www.genecards.org/cgi-bin/carddisp.pl?gene=CD5">https://www.genecards.org/cgi-bin/carddisp.pl?gene=CD5</a>         |
| SULT1E1 | Sulfotransferas<br>e Family 1E<br>Member 1            | Protein<br>Coding | 45 | GC04M069<br>841 | 8.568748 | <a href="https://www.genecards.org/cgi-bin/carddisp.pl?gene=SULT1E1">https://www.genecards.org/cgi-bin/carddisp.pl?gene=SULT1E1</a> |
| NAB2    | NGFI-A<br>Binding Protein<br>2                        | Protein<br>Coding | 41 | GC12P0570<br>88 | 8.567242 | <a href="https://www.genecards.org/cgi-bin/carddisp.pl?gene=NAB2">https://www.genecards.org/cgi-bin/carddisp.pl?gene=NAB2</a>       |
| TBL1X   | Transducin<br>Beta Like 1 X-<br>Linked                | Protein<br>Coding | 38 | GC0XP0094<br>63 | 8.562752 | <a href="https://www.genecards.org/cgi-bin/carddisp.pl?gene=TBL1X">https://www.genecards.org/cgi-bin/carddisp.pl?gene=TBL1X</a>     |
| AQP9    | Aquaporin 9                                           | Protein<br>Coding | 44 | GC15P0581<br>38 | 8.561291 | <a href="https://www.genecards.org/cgi-bin/carddisp.pl?gene=AQP9">https://www.genecards.org/cgi-bin/carddisp.pl?gene=AQP9</a>       |
| RHBDF2  | Rhomboid 5<br>Homolog 2                               | Protein<br>Coding | 41 | GC17M076<br>470 | 8.559841 | <a href="https://www.genecards.org/cgi-bin/carddisp.pl?gene=RHBDF2">https://www.genecards.org/cgi-bin/carddisp.pl?gene=RHBDF2</a>   |
| NEFM    | Neurofilament<br>Medium Chain<br>Immunoglobuli<br>n E | Protein<br>Coding | 43 | GC08P0249<br>13 | 8.559085 | <a href="https://www.genecards.org/cgi-bin/carddisp.pl?gene=NEFM">https://www.genecards.org/cgi-bin/carddisp.pl?gene=NEFM</a>       |
| IGES    | Concentration,<br>Serum                               | Genetic<br>Locus  | 4  | GC05U9900<br>33 | 8.558283 | <a href="https://www.genecards.org/cgi-bin/carddisp.pl?gene=IGES">https://www.genecards.org/cgi-bin/carddisp.pl?gene=IGES</a>       |

|          |                                            |                |    |             |          |                                                                                                                                       |
|----------|--------------------------------------------|----------------|----|-------------|----------|---------------------------------------------------------------------------------------------------------------------------------------|
| MIR490   | MicroRNA 490                               | RNA Gene       | 16 | GC07P136903 | 8.544781 | <a href="https://www.genecards.org/cgi-bin/carddisp.pl?gene=MIR490">https://www.genecards.org/cgi-bin/carddisp.pl?gene=MIR490</a>     |
| MIR129-1 | MicroRNA 129-1                             | RNA Gene       | 18 | GC07P128207 | 8.542717 | <a href="https://www.genecards.org/cgi-bin/carddisp.pl?gene=MIR129-1">https://www.genecards.org/cgi-bin/carddisp.pl?gene=MIR129-1</a> |
| S100A4   | S100 Calcium Binding Protein A4            | Protein Coding | 44 | GC01M153543 | 8.542686 | <a href="https://www.genecards.org/cgi-bin/carddisp.pl?gene=S100A4">https://www.genecards.org/cgi-bin/carddisp.pl?gene=S100A4</a>     |
| UGDH     | UDP-Glucose 6-Dehydrogenase                | Protein Coding | 47 | GC04M039502 | 8.533478 | <a href="https://www.genecards.org/cgi-bin/carddisp.pl?gene=UGDH">https://www.genecards.org/cgi-bin/carddisp.pl?gene=UGDH</a>         |
| CRY1     | Cryptochrome Circadian Regulator 1         | Protein Coding | 44 | GC12M106991 | 8.533283 | <a href="https://www.genecards.org/cgi-bin/carddisp.pl?gene=CRY1">https://www.genecards.org/cgi-bin/carddisp.pl?gene=CRY1</a>         |
| RHOC     | Ras Homolog Family Member C                | Protein Coding | 41 | GC01M112701 | 8.522123 | <a href="https://www.genecards.org/cgi-bin/carddisp.pl?gene=RHOC">https://www.genecards.org/cgi-bin/carddisp.pl?gene=RHOC</a>         |
| CCL7     | C-C Motif Chemokine Ligand 7               | Protein Coding | 42 | GC17P034270 | 8.517108 | <a href="https://www.genecards.org/cgi-bin/carddisp.pl?gene=CCL7">https://www.genecards.org/cgi-bin/carddisp.pl?gene=CCL7</a>         |
| KAT5     | Lysine Acetyltransferase 5                 | Protein Coding | 47 | GC11P065711 | 8.496277 | <a href="https://www.genecards.org/cgi-bin/carddisp.pl?gene=KAT5">https://www.genecards.org/cgi-bin/carddisp.pl?gene=KAT5</a>         |
| SGCA     | Sarcoglycan Alpha                          | Protein Coding | 43 | GC17P050164 | 8.490235 | <a href="https://www.genecards.org/cgi-bin/carddisp.pl?gene=SGCA">https://www.genecards.org/cgi-bin/carddisp.pl?gene=SGCA</a>         |
| ESRRB    | Estrogen Related Receptor Beta             | Protein Coding | 50 | GC14P076310 | 8.489886 | <a href="https://www.genecards.org/cgi-bin/carddisp.pl?gene=ESRRB">https://www.genecards.org/cgi-bin/carddisp.pl?gene=ESRRB</a>       |
| PDE3B    | Phosphodiesterase 3B                       | Protein Coding | 44 | GC11P014643 | 8.488647 | <a href="https://www.genecards.org/cgi-bin/carddisp.pl?gene=PDE3B">https://www.genecards.org/cgi-bin/carddisp.pl?gene=PDE3B</a>       |
| TNRC6A   | Trinucleotide Repeat Containing Adaptor 6A | Protein Coding | 40 | GC16P024611 | 8.47611  | <a href="https://www.genecards.org/cgi-bin/carddisp.pl?gene=TNRC6A">https://www.genecards.org/cgi-bin/carddisp.pl?gene=TNRC6A</a>     |
| CSN2     | Casein Beta                                | Protein Coding | 37 | GC04M069955 | 8.473336 | <a href="https://www.genecards.org/cgi-bin/carddisp.pl?gene=CSN2">https://www.genecards.org/cgi-bin/carddisp.pl?gene=CSN2</a>         |
| MYO1E    | Myosin IE                                  | Protein Coding | 44 | GC15M059132 | 8.47229  | <a href="https://www.genecards.org/cgi-bin/carddisp.pl?gene=MYO1E">https://www.genecards.org/cgi-bin/carddisp.pl?gene=MYO1E</a>       |
| WDR81    | WD Repeat Domain 81                        | Protein Coding | 37 | GC17P001716 | 8.471716 | <a href="https://www.genecards.org/cgi-bin/carddisp.pl?gene=WDR81">https://www.genecards.org/cgi-bin/carddisp.pl?gene=WDR81</a>       |
| RPL26    | Ribosomal Protein L26                      | Protein Coding | 43 | GC17M008377 | 8.470219 | <a href="https://www.genecards.org/cgi-bin/carddisp.pl?gene=RPL26">https://www.genecards.org/cgi-bin/carddisp.pl?gene=RPL26</a>       |
| DUSP1    | Dual Specificity Phosphatase 1             | Protein Coding | 48 | GC05M172768 | 8.468688 | <a href="https://www.genecards.org/cgi-bin/carddisp.pl?gene=DUSP1">https://www.genecards.org/cgi-bin/carddisp.pl?gene=DUSP1</a>       |
| LEMD3    | LEM Domain Containing 3                    | Protein Coding | 41 | GC12P065169 | 8.465513 | <a href="https://www.genecards.org/cgi-bin/carddisp.pl?gene=LEMD3">https://www.genecards.org/cgi-bin/carddisp.pl?gene=LEMD3</a>       |
| L2HGDH   | L-2-Hydroxyglutarate Dehydrogenase         | Protein Coding | 41 | GC14M050237 | 8.464959 | <a href="https://www.genecards.org/cgi-bin/carddisp.pl?gene=L2HGDH">https://www.genecards.org/cgi-bin/carddisp.pl?gene=L2HGDH</a>     |
| DCXR     | Dicarbonyl And L-Xylulose Reductase        | Protein Coding | 45 | GC17M082036 | 8.46411  | <a href="https://www.genecards.org/cgi-bin/carddisp.pl?gene=DCXR">https://www.genecards.org/cgi-bin/carddisp.pl?gene=DCXR</a>         |
| PDSS1    | Decaprenyl Diphosphate Synthase Subunit 1  | Protein Coding | 43 | GC10P026697 | 8.464005 | <a href="https://www.genecards.org/cgi-bin/carddisp.pl?gene=PDSS1">https://www.genecards.org/cgi-bin/carddisp.pl?gene=PDSS1</a>       |

|         |                                                                                  |                |    |             |          |                                                                                                                                     |
|---------|----------------------------------------------------------------------------------|----------------|----|-------------|----------|-------------------------------------------------------------------------------------------------------------------------------------|
| MFF     | Mitochondrial Fission Factor                                                     | Protein Coding | 38 | GC02P227325 | 8.461156 | <a href="https://www.genecards.org/cgi-bin/carddisp.pl?gene=MFF">https://www.genecards.org/cgi-bin/carddisp.pl?gene=MFF</a>         |
| ACER3   | Alkaline Ceramidase 3                                                            | Protein Coding | 39 | GC11P076860 | 8.453665 | <a href="https://www.genecards.org/cgi-bin/carddisp.pl?gene=ACER3">https://www.genecards.org/cgi-bin/carddisp.pl?gene=ACER3</a>     |
| KYNU    | Kynureninase                                                                     | Protein Coding | 47 | GC02P142877 | 8.449566 | <a href="https://www.genecards.org/cgi-bin/carddisp.pl?gene=KYNU">https://www.genecards.org/cgi-bin/carddisp.pl?gene=KYNU</a>       |
| REL     | REL Proto-Oncogene, NF-KB Subunit                                                | Protein Coding | 47 | GC02P060881 | 8.447259 | <a href="https://www.genecards.org/cgi-bin/carddisp.pl?gene=REL">https://www.genecards.org/cgi-bin/carddisp.pl?gene=REL</a>         |
| PARVB   | Parvin Beta                                                                      | Protein Coding | 40 | GC22P043999 | 8.441185 | <a href="https://www.genecards.org/cgi-bin/carddisp.pl?gene=PARVB">https://www.genecards.org/cgi-bin/carddisp.pl?gene=PARVB</a>     |
| ROBO1   | Roundabout Guidance Receptor 1                                                   | Protein Coding | 45 | GC03M078597 | 8.439934 | <a href="https://www.genecards.org/cgi-bin/carddisp.pl?gene=ROBO1">https://www.genecards.org/cgi-bin/carddisp.pl?gene=ROBO1</a>     |
| DEAF1   | DEAF1 Transcription Factor                                                       | Protein Coding | 40 | GC11M000644 | 8.436068 | <a href="https://www.genecards.org/cgi-bin/carddisp.pl?gene=DEAF1">https://www.genecards.org/cgi-bin/carddisp.pl?gene=DEAF1</a>     |
| PIKFYVE | Phosphoinositide Kinase, FYVE-Type Zinc Finger Containing Damage                 | Protein Coding | 48 | GC02P208266 | 8.434423 | <a href="https://www.genecards.org/cgi-bin/carddisp.pl?gene=PIKFYVE">https://www.genecards.org/cgi-bin/carddisp.pl?gene=PIKFYVE</a> |
| DDB1    | Specific DNA Binding Protein 1                                                   | Protein Coding | 43 | GC11M069196 | 8.432693 | <a href="https://www.genecards.org/cgi-bin/carddisp.pl?gene=DDB1">https://www.genecards.org/cgi-bin/carddisp.pl?gene=DDB1</a>       |
| GPIHBP1 | Glycosylphosphatidylinositol Anchored High Density Lipoprotein Binding Protein 1 | Protein Coding | 35 | GC08P143213 | 8.431719 | <a href="https://www.genecards.org/cgi-bin/carddisp.pl?gene=GPIHBP1">https://www.genecards.org/cgi-bin/carddisp.pl?gene=GPIHBP1</a> |
| HAP1    | Huntingtin Associated Protein 1                                                  | Protein Coding | 40 | GC17M041717 | 8.429021 | <a href="https://www.genecards.org/cgi-bin/carddisp.pl?gene=HAP1">https://www.genecards.org/cgi-bin/carddisp.pl?gene=HAP1</a>       |
| KISS1   | KISS-1 Metastasis Suppressor                                                     | Protein Coding | 42 | GC01M204190 | 8.422831 | <a href="https://www.genecards.org/cgi-bin/carddisp.pl?gene=KISS1">https://www.genecards.org/cgi-bin/carddisp.pl?gene=KISS1</a>     |
| ARID5B  | AT-Rich Interaction Domain 5B                                                    | Protein Coding | 41 | GC10P061901 | 8.419536 | <a href="https://www.genecards.org/cgi-bin/carddisp.pl?gene=ARID5B">https://www.genecards.org/cgi-bin/carddisp.pl?gene=ARID5B</a>   |
| CHRND   | Cholinergic Receptor Nicotinic Delta Subunit                                     | Protein Coding | 43 | GC02P232525 | 8.418051 | <a href="https://www.genecards.org/cgi-bin/carddisp.pl?gene=CHRND">https://www.genecards.org/cgi-bin/carddisp.pl?gene=CHRND</a>     |
| LTA4H   | Leukotriene A4 Hydrolase                                                         | Protein Coding | 47 | GC12M096000 | 8.418037 | <a href="https://www.genecards.org/cgi-bin/carddisp.pl?gene=LTA4H">https://www.genecards.org/cgi-bin/carddisp.pl?gene=LTA4H</a>     |
| UGT2B17 | UDP Glucuronosyltransferase Family 2 Member B17                                  | Protein Coding | 41 | GC04M068537 | 8.417027 | <a href="https://www.genecards.org/cgi-bin/carddisp.pl?gene=UGT2B17">https://www.genecards.org/cgi-bin/carddisp.pl?gene=UGT2B17</a> |
| POLR1D  | RNA Polymerase I And III Subunit D                                               | Protein Coding | 45 | GC13P027620 | 8.416927 | <a href="https://www.genecards.org/cgi-bin/carddisp.pl?gene=POLR1D">https://www.genecards.org/cgi-bin/carddisp.pl?gene=POLR1D</a>   |

|          |                                                    |                |    |             |          |                                                                                                                                       |
|----------|----------------------------------------------------|----------------|----|-------------|----------|---------------------------------------------------------------------------------------------------------------------------------------|
| FSCN1    | Fascin Actin-Bundling Protein 1                    | Protein Coding | 44 | GC07P005592 | 8.416878 | <a href="https://www.genecards.org/cgi-bin/carddisp.pl?gene=FSCN1">https://www.genecards.org/cgi-bin/carddisp.pl?gene=FSCN1</a>       |
| TUBB2A   | Tubulin Beta 2A Class IIa                          | Protein Coding | 46 | GC06M003153 | 8.416239 | <a href="https://www.genecards.org/cgi-bin/carddisp.pl?gene=TUBB2A">https://www.genecards.org/cgi-bin/carddisp.pl?gene=TUBB2A</a>     |
| AZIN1    | Antizyme Inhibitor 1                               | Protein Coding | 40 | GC08M102826 | 8.412376 | <a href="https://www.genecards.org/cgi-bin/carddisp.pl?gene=AZIN1">https://www.genecards.org/cgi-bin/carddisp.pl?gene=AZIN1</a>       |
| GNAI1    | G Protein Subunit Alpha I1                         | Protein Coding | 48 | GC07P079769 | 8.411148 | <a href="https://www.genecards.org/cgi-bin/carddisp.pl?gene=GNAI1">https://www.genecards.org/cgi-bin/carddisp.pl?gene=GNAI1</a>       |
| RPS17    | Ribosomal Protein S17                              | Protein Coding | 43 | GC15M082536 | 8.403085 | <a href="https://www.genecards.org/cgi-bin/carddisp.pl?gene=RPS17">https://www.genecards.org/cgi-bin/carddisp.pl?gene=RPS17</a>       |
| MARK3    | Microtubule Affinity Regulating Kinase 3           | Protein Coding | 49 | GC14P103385 | 8.402725 | <a href="https://www.genecards.org/cgi-bin/carddisp.pl?gene=MARK3">https://www.genecards.org/cgi-bin/carddisp.pl?gene=MARK3</a>       |
| CCAT1    | Colon Cancer Associated Transcript 1               | RNA Gene       | 14 | GC08M127207 | 8.400127 | <a href="https://www.genecards.org/cgi-bin/carddisp.pl?gene=CCAT1">https://www.genecards.org/cgi-bin/carddisp.pl?gene=CCAT1</a>       |
| TRDN     | Triadin                                            | Protein Coding | 41 | GC06M123198 | 8.396246 | <a href="https://www.genecards.org/cgi-bin/carddisp.pl?gene=TRDN">https://www.genecards.org/cgi-bin/carddisp.pl?gene=TRDN</a>         |
| HSPA6    | Heat Shock Protein Family A (Hsp70) Member 6       | Protein Coding | 45 | GC01P161524 | 8.396116 | <a href="https://www.genecards.org/cgi-bin/carddisp.pl?gene=HSPA6">https://www.genecards.org/cgi-bin/carddisp.pl?gene=HSPA6</a>       |
| H4-16    | H4 Histone 16                                      | Protein Coding | 34 | GC12M015752 | 8.393721 | <a href="https://www.genecards.org/cgi-bin/carddisp.pl?gene=H4-16">https://www.genecards.org/cgi-bin/carddisp.pl?gene=H4-16</a>       |
| GPT2     | Glutamic--Pyruvic Transaminase 2                   | Protein Coding | 48 | GC16P046885 | 8.390795 | <a href="https://www.genecards.org/cgi-bin/carddisp.pl?gene=GPT2">https://www.genecards.org/cgi-bin/carddisp.pl?gene=GPT2</a>         |
| NCOR2    | Nuclear Receptor Corepressor 2                     | Protein Coding | 45 | GC12M124324 | 8.388487 | <a href="https://www.genecards.org/cgi-bin/carddisp.pl?gene=NCOR2">https://www.genecards.org/cgi-bin/carddisp.pl?gene=NCOR2</a>       |
| POMK     | Protein O-Mannose Kinase                           | Protein Coding | 38 | GC08P043093 | 8.372009 | <a href="https://www.genecards.org/cgi-bin/carddisp.pl?gene=POMK">https://www.genecards.org/cgi-bin/carddisp.pl?gene=POMK</a>         |
| APOF     | Apolipoprotein F                                   | Protein Coding | 39 | GC12M056371 | 8.370247 | <a href="https://www.genecards.org/cgi-bin/carddisp.pl?gene=APOF">https://www.genecards.org/cgi-bin/carddisp.pl?gene=APOF</a>         |
| DSC3     | Desmocollin 3                                      | Protein Coding | 43 | GC18M030990 | 8.368109 | <a href="https://www.genecards.org/cgi-bin/carddisp.pl?gene=DSC3">https://www.genecards.org/cgi-bin/carddisp.pl?gene=DSC3</a>         |
| MIR574   | MicroRNA 574                                       | RNA Gene       | 18 | GC04P038872 | 8.364106 | <a href="https://www.genecards.org/cgi-bin/carddisp.pl?gene=MIR574">https://www.genecards.org/cgi-bin/carddisp.pl?gene=MIR574</a>     |
| SLC25A47 | Solute Carrier Family 25 Member 47                 | Protein Coding | 35 | GC14P100323 | 8.361531 | <a href="https://www.genecards.org/cgi-bin/carddisp.pl?gene=SLC25A47">https://www.genecards.org/cgi-bin/carddisp.pl?gene=SLC25A47</a> |
| INPPL1   | Inositol Polyphosphate Phosphatase Like 1          | Protein Coding | 50 | GC11P072223 | 8.360861 | <a href="https://www.genecards.org/cgi-bin/carddisp.pl?gene=INPPL1">https://www.genecards.org/cgi-bin/carddisp.pl?gene=INPPL1</a>     |
| BOLA3    | BolA Family Member 3                               | Protein Coding | 38 | GC02M074136 | 8.35907  | <a href="https://www.genecards.org/cgi-bin/carddisp.pl?gene=BOLA3">https://www.genecards.org/cgi-bin/carddisp.pl?gene=BOLA3</a>       |
| ST3GAL5  | ST3 Beta-Galactoside Alpha-2,3-Sialyltransferase 5 | Protein Coding | 48 | GC02M085839 | 8.357241 | <a href="https://www.genecards.org/cgi-bin/carddisp.pl?gene=ST3GAL5">https://www.genecards.org/cgi-bin/carddisp.pl?gene=ST3GAL5</a>   |

|        |                                                                                                               |                |    |             |          |                                                                                                                                   |
|--------|---------------------------------------------------------------------------------------------------------------|----------------|----|-------------|----------|-----------------------------------------------------------------------------------------------------------------------------------|
| CEP63  | Centrosomal Protein 63 Pyruvate                                                                               | Protein Coding | 41 | GC03P134485 | 8.354568 | <a href="https://www.genecards.org/cgi-bin/carddisp.pl?gene=CEP63">https://www.genecards.org/cgi-bin/carddisp.pl?gene=CEP63</a>   |
| PDHX   | Dehydrogenase Complex Component X                                                                             | Protein Coding | 48 | GC11P034894 | 8.349999 | <a href="https://www.genecards.org/cgi-bin/carddisp.pl?gene=PDHX">https://www.genecards.org/cgi-bin/carddisp.pl?gene=PDHX</a>     |
| SIK1   | Salt Inducible Kinase 1                                                                                       | Protein Coding | 47 | GC21M043414 | 8.349818 | <a href="https://www.genecards.org/cgi-bin/carddisp.pl?gene=SIK1">https://www.genecards.org/cgi-bin/carddisp.pl?gene=SIK1</a>     |
| TBL2   | Transducin Beta Like 2                                                                                        | Protein Coding | 40 | GC07M073568 | 8.347002 | <a href="https://www.genecards.org/cgi-bin/carddisp.pl?gene=TBL2">https://www.genecards.org/cgi-bin/carddisp.pl?gene=TBL2</a>     |
| CIB1   | Calcium And Integrin Binding 1                                                                                | Protein Coding | 42 | GC15M090229 | 8.34471  | <a href="https://www.genecards.org/cgi-bin/carddisp.pl?gene=CIB1">https://www.genecards.org/cgi-bin/carddisp.pl?gene=CIB1</a>     |
| CD24   | CD24 Molecule                                                                                                 | Protein Coding | 35 | GC06M106969 | 8.344307 | <a href="https://www.genecards.org/cgi-bin/carddisp.pl?gene=CD24">https://www.genecards.org/cgi-bin/carddisp.pl?gene=CD24</a>     |
| UBQLN1 | Ubiquilin 1                                                                                                   | Protein Coding | 43 | GC09M083659 | 8.344234 | <a href="https://www.genecards.org/cgi-bin/carddisp.pl?gene=UBQLN1">https://www.genecards.org/cgi-bin/carddisp.pl?gene=UBQLN1</a> |
| H2AX   | H2A.X Variant Histone                                                                                         | Protein Coding | 36 | GC11M119097 | 8.340709 | <a href="https://www.genecards.org/cgi-bin/carddisp.pl?gene=H2AX">https://www.genecards.org/cgi-bin/carddisp.pl?gene=H2AX</a>     |
| TPK1   | Thiamin Pyrophosphokinase 1 Reversion Inducing Cysteine Rich Protein With Kazal Motifs                        | Protein Coding | 47 | GC07M144451 | 8.335488 | <a href="https://www.genecards.org/cgi-bin/carddisp.pl?gene=TPK1">https://www.genecards.org/cgi-bin/carddisp.pl?gene=TPK1</a>     |
| RECK   | Alkaline Phosphatase, Germ Cell                                                                               | Protein Coding | 41 | GC09P036036 | 8.331703 | <a href="https://www.genecards.org/cgi-bin/carddisp.pl?gene=RECK">https://www.genecards.org/cgi-bin/carddisp.pl?gene=RECK</a>     |
| ALPG   | Myosin Heavy Chain 2                                                                                          | Protein Coding | 33 | GC02P232407 | 8.32972  | <a href="https://www.genecards.org/cgi-bin/carddisp.pl?gene=ALPG">https://www.genecards.org/cgi-bin/carddisp.pl?gene=ALPG</a>     |
| MYH2   | EPH Receptor A2                                                                                               | Protein Coding | 47 | GC17M010521 | 8.329264 | <a href="https://www.genecards.org/cgi-bin/carddisp.pl?gene=MYH2">https://www.genecards.org/cgi-bin/carddisp.pl?gene=MYH2</a>     |
| EPHA2  | NEDD4 E3 Ubiquitin Protein Ligase                                                                             | Protein Coding | 53 | GC01M016124 | 8.328029 | <a href="https://www.genecards.org/cgi-bin/carddisp.pl?gene=EPHA2">https://www.genecards.org/cgi-bin/carddisp.pl?gene=EPHA2</a>   |
| NEDD4  | Acetyl-CoA Acetyltransferase 2                                                                                | Protein Coding | 47 | GC15M055826 | 8.325156 | <a href="https://www.genecards.org/cgi-bin/carddisp.pl?gene=NEDD4">https://www.genecards.org/cgi-bin/carddisp.pl?gene=NEDD4</a>   |
| ACAT2  | Glypican 6                                                                                                    | Protein Coding | 47 | GC06P159760 | 8.323915 | <a href="https://www.genecards.org/cgi-bin/carddisp.pl?gene=ACAT2">https://www.genecards.org/cgi-bin/carddisp.pl?gene=ACAT2</a>   |
| GPC6   | Cellular Communication Network Factor 1 Potassium Voltage-Gated Channel Subfamily A Regulatory Beta Subunit 2 | Protein Coding | 44 | GC13P093226 | 8.320648 | <a href="https://www.genecards.org/cgi-bin/carddisp.pl?gene=GPC6">https://www.genecards.org/cgi-bin/carddisp.pl?gene=GPC6</a>     |
| CCN1   | Zinc Finger Protein 292                                                                                       | Protein Coding | 31 | GC01P085581 | 8.315063 | <a href="https://www.genecards.org/cgi-bin/carddisp.pl?gene=CCN1">https://www.genecards.org/cgi-bin/carddisp.pl?gene=CCN1</a>     |
| KCNAB2 | Calmodulin 3                                                                                                  | Protein Coding | 43 | GC01P006020 | 8.309748 | <a href="https://www.genecards.org/cgi-bin/carddisp.pl?gene=KCNAB2">https://www.genecards.org/cgi-bin/carddisp.pl?gene=KCNAB2</a> |
| ZNF292 |                                                                                                               | Protein Coding | 36 | GC06P087153 | 8.308033 | <a href="https://www.genecards.org/cgi-bin/carddisp.pl?gene=ZNF292">https://www.genecards.org/cgi-bin/carddisp.pl?gene=ZNF292</a> |
| CALM3  |                                                                                                               | Protein Coding | 43 | GC19P046601 | 8.303206 | <a href="https://www.genecards.org/cgi-bin/carddisp.pl?gene=CALM3">https://www.genecards.org/cgi-bin/carddisp.pl?gene=CALM3</a>   |



|         |                                                        |                |    |             |          |                                                                                                                                     |
|---------|--------------------------------------------------------|----------------|----|-------------|----------|-------------------------------------------------------------------------------------------------------------------------------------|
| CXADR   | CXADR Ig-Like Cell Adhesion Molecule                   | Protein Coding | 44 | GC21P017513 | 8.302159 | <a href="https://www.genecards.org/cgi-bin/carddisp.pl?gene=CXADR">https://www.genecards.org/cgi-bin/carddisp.pl?gene=CXADR</a>     |
| ATOX1   | Antioxidant 1 Copper Chaperone EBP                     | Protein Coding | 41 | GC05M151743 | 8.299313 | <a href="https://www.genecards.org/cgi-bin/carddisp.pl?gene=ATOX1">https://www.genecards.org/cgi-bin/carddisp.pl?gene=ATOX1</a>     |
| EBP     | Cholestenol Delta-Isomerase                            | Protein Coding | 44 | GC0XP048521 | 8.296646 | <a href="https://www.genecards.org/cgi-bin/carddisp.pl?gene=EBP">https://www.genecards.org/cgi-bin/carddisp.pl?gene=EBP</a>         |
| PSMC6   | Proteasome 26S Subunit, ATPase 6 Immediate             | Protein Coding | 41 | GC14P052707 | 8.295078 | <a href="https://www.genecards.org/cgi-bin/carddisp.pl?gene=PSMC6">https://www.genecards.org/cgi-bin/carddisp.pl?gene=PSMC6</a>     |
| IER3IP1 | Early Response 3 Interacting Protein 1                 | Protein Coding | 38 | GC18M047152 | 8.287568 | <a href="https://www.genecards.org/cgi-bin/carddisp.pl?gene=IER3IP1">https://www.genecards.org/cgi-bin/carddisp.pl?gene=IER3IP1</a> |
| PRDM2   | PR/SET Domain 2                                        | Protein Coding | 41 | GC01P013755 | 8.281184 | <a href="https://www.genecards.org/cgi-bin/carddisp.pl?gene=PRDM2">https://www.genecards.org/cgi-bin/carddisp.pl?gene=PRDM2</a>     |
| BUB1B   | BUB1 Mitotic Checkpoint Serine/Threonine Kinase B      | Protein Coding | 50 | GC15P040161 | 8.279211 | <a href="https://www.genecards.org/cgi-bin/carddisp.pl?gene=BUB1B">https://www.genecards.org/cgi-bin/carddisp.pl?gene=BUB1B</a>     |
| EIF3F   | Eukaryotic Translation Initiation Factor 3 Subunit F   | Protein Coding | 44 | GC11P007966 | 8.27682  | <a href="https://www.genecards.org/cgi-bin/carddisp.pl?gene=EIF3F">https://www.genecards.org/cgi-bin/carddisp.pl?gene=EIF3F</a>     |
| CSN1S1  | Casein Alpha S1                                        | Protein Coding | 34 | GC04P069932 | 8.275702 | <a href="https://www.genecards.org/cgi-bin/carddisp.pl?gene=CSN1S1">https://www.genecards.org/cgi-bin/carddisp.pl?gene=CSN1S1</a>   |
| BLOC1S3 | Biogenesis Of Lysosomal Organelles Complex 1 Subunit 3 | Protein Coding | 36 | GC19P045178 | 8.273204 | <a href="https://www.genecards.org/cgi-bin/carddisp.pl?gene=BLOC1S3">https://www.genecards.org/cgi-bin/carddisp.pl?gene=BLOC1S3</a> |
| COPS5   | COP9 Signalosome Subunit 5                             | Protein Coding | 43 | GC08M067043 | 8.270369 | <a href="https://www.genecards.org/cgi-bin/carddisp.pl?gene=COPS5">https://www.genecards.org/cgi-bin/carddisp.pl?gene=COPS5</a>     |
| ANXA4   | Annexin A4                                             | Protein Coding | 45 | GC02P069644 | 8.268375 | <a href="https://www.genecards.org/cgi-bin/carddisp.pl?gene=ANXA4">https://www.genecards.org/cgi-bin/carddisp.pl?gene=ANXA4</a>     |
| CISD2   | CDGSH Iron Sulfur Domain 2                             | Protein Coding | 42 | GC04P102868 | 8.261267 | <a href="https://www.genecards.org/cgi-bin/carddisp.pl?gene=CISD2">https://www.genecards.org/cgi-bin/carddisp.pl?gene=CISD2</a>     |
| TREM1   | Triggering Receptor Expressed On Myeloid Cells 1       | Protein Coding | 41 | GC06M041267 | 8.256388 | <a href="https://www.genecards.org/cgi-bin/carddisp.pl?gene=TREM1">https://www.genecards.org/cgi-bin/carddisp.pl?gene=TREM1</a>     |
| ATP8A1  | ATPase Phospholipid Transporting 8A1                   | Protein Coding | 43 | GC04M042410 | 8.255957 | <a href="https://www.genecards.org/cgi-bin/carddisp.pl?gene=ATP8A1">https://www.genecards.org/cgi-bin/carddisp.pl?gene=ATP8A1</a>   |
| ATP5F1B | ATP Synthase F1 Subunit Beta                           | Protein Coding | 34 | GC12M056639 | 8.253869 | <a href="https://www.genecards.org/cgi-bin/carddisp.pl?gene=ATP5F1B">https://www.genecards.org/cgi-bin/carddisp.pl?gene=ATP5F1B</a> |
| HLA-E   | Major Histocompatibility Complex, Class I, E           | Protein Coding | 42 | GC06P055176 | 8.248782 | <a href="https://www.genecards.org/cgi-bin/carddisp.pl?gene=HLA-E">https://www.genecards.org/cgi-bin/carddisp.pl?gene=HLA-E</a>     |

|          |                                                                         |                |    |             |          |                                                                                                                                       |
|----------|-------------------------------------------------------------------------|----------------|----|-------------|----------|---------------------------------------------------------------------------------------------------------------------------------------|
| MIR361   | MicroRNA 361                                                            | RNA Gene       | 16 | GC0XM085903 | 8.242687 | <a href="https://www.genecards.org/cgi-bin/carddisp.pl?gene=MIR361">https://www.genecards.org/cgi-bin/carddisp.pl?gene=MIR361</a>     |
| SERPINB2 | Serpin Family B Member 2                                                | Protein Coding | 44 | GC18P063871 | 8.236845 | <a href="https://www.genecards.org/cgi-bin/carddisp.pl?gene=SERPINB2">https://www.genecards.org/cgi-bin/carddisp.pl?gene=SERPINB2</a> |
| CRADD    | CASP2 And RIPK1 Domain Containing Adaptor With Death Domain Abhydrolase | Protein Coding | 44 | GC12P093677 | 8.234291 | <a href="https://www.genecards.org/cgi-bin/carddisp.pl?gene=CRADD">https://www.genecards.org/cgi-bin/carddisp.pl?gene=CRADD</a>       |
| ABHD2    | Domain Containing 2, Acylglycerol Lipase                                | Protein Coding | 38 | GC15P089087 | 8.227392 | <a href="https://www.genecards.org/cgi-bin/carddisp.pl?gene=ABHD2">https://www.genecards.org/cgi-bin/carddisp.pl?gene=ABHD2</a>       |
| IL1RL1   | Interleukin 1 Receptor Like 1                                           | Protein Coding | 41 | GC02P102294 | 8.225016 | <a href="https://www.genecards.org/cgi-bin/carddisp.pl?gene=IL1RL1">https://www.genecards.org/cgi-bin/carddisp.pl?gene=IL1RL1</a>     |
| GYPB     | Glycophorin B (MNS Blood Group)                                         | Protein Coding | 38 | GC04M143996 | 8.224806 | <a href="https://www.genecards.org/cgi-bin/carddisp.pl?gene=GYPB">https://www.genecards.org/cgi-bin/carddisp.pl?gene=GYPB</a>         |
| CDIPT    | CDP-Diacylglycerol-Inositol 3-Phosphatidyltransferase                   | Protein Coding | 43 | GC16M031170 | 8.222588 | <a href="https://www.genecards.org/cgi-bin/carddisp.pl?gene=CDIPT">https://www.genecards.org/cgi-bin/carddisp.pl?gene=CDIPT</a>       |
| FSHR     | Follicle Stimulating Hormone Receptor                                   | Protein Coding | 50 | GC02M048953 | 8.221106 | <a href="https://www.genecards.org/cgi-bin/carddisp.pl?gene=FSHR">https://www.genecards.org/cgi-bin/carddisp.pl?gene=FSHR</a>         |
| SAA4     | Serum Amyloid A4, Constitutive                                          | Protein Coding | 40 | GC11M018234 | 8.220345 | <a href="https://www.genecards.org/cgi-bin/carddisp.pl?gene=SAA4">https://www.genecards.org/cgi-bin/carddisp.pl?gene=SAA4</a>         |
| NFIC     | Nuclear Factor I C                                                      | Protein Coding | 41 | GC19P003314 | 8.215161 | <a href="https://www.genecards.org/cgi-bin/carddisp.pl?gene=NFIC">https://www.genecards.org/cgi-bin/carddisp.pl?gene=NFIC</a>         |
| TACR3    | Tachykinin Receptor 3                                                   | Protein Coding | 51 | GC04M103586 | 8.210999 | <a href="https://www.genecards.org/cgi-bin/carddisp.pl?gene=TACR3">https://www.genecards.org/cgi-bin/carddisp.pl?gene=TACR3</a>       |
| KDSR     | 3-Ketodihydrospingosine Reductase                                       | Protein Coding | 41 | GC18M063327 | 8.208986 | <a href="https://www.genecards.org/cgi-bin/carddisp.pl?gene=KDSR">https://www.genecards.org/cgi-bin/carddisp.pl?gene=KDSR</a>         |
| PGD      | Phosphogluconate Dehydrogenase                                          | Protein Coding | 47 | GC01P010398 | 8.203134 | <a href="https://www.genecards.org/cgi-bin/carddisp.pl?gene=PGD">https://www.genecards.org/cgi-bin/carddisp.pl?gene=PGD</a>           |
| TFE3     | Transcription Factor Binding To IGHM Enhancer 3                         | Protein Coding | 44 | GC0XM049028 | 8.202929 | <a href="https://www.genecards.org/cgi-bin/carddisp.pl?gene=TFE3">https://www.genecards.org/cgi-bin/carddisp.pl?gene=TFE3</a>         |
| MASP1    | MBL Associated Serine Protease 1                                        | Protein Coding | 47 | GC03M187216 | 8.202531 | <a href="https://www.genecards.org/cgi-bin/carddisp.pl?gene=MASP1">https://www.genecards.org/cgi-bin/carddisp.pl?gene=MASP1</a>       |
| FUNDC2   | FUN14 Domain Containing 2                                               | Protein Coding | 35 | GC0XP155025 | 8.196218 | <a href="https://www.genecards.org/cgi-bin/carddisp.pl?gene=FUNDC2">https://www.genecards.org/cgi-bin/carddisp.pl?gene=FUNDC2</a>     |

|           |                                              |                |    |             |          |                                                                                                                                         |
|-----------|----------------------------------------------|----------------|----|-------------|----------|-----------------------------------------------------------------------------------------------------------------------------------------|
| BMI1      | BMI1 Proto-Oncogene, Polycomb Ring Finger    | Protein Coding | 44 | GC10P022326 | 8.191759 | <a href="https://www.genecards.org/cgi-bin/carddisp.pl?gene=BMI1">https://www.genecards.org/cgi-bin/carddisp.pl?gene=BMI1</a>           |
| MSH3      | MutS Homolog 3                               | Protein Coding | 44 | GC05P080654 | 8.187807 | <a href="https://www.genecards.org/cgi-bin/carddisp.pl?gene=MSH3">https://www.genecards.org/cgi-bin/carddisp.pl?gene=MSH3</a>           |
| AMPD3     | Adenosine Monophosphate Deaminase 3          | Protein Coding | 46 | GC11P010309 | 8.181871 | <a href="https://www.genecards.org/cgi-bin/carddisp.pl?gene=AMPD3">https://www.genecards.org/cgi-bin/carddisp.pl?gene=AMPD3</a>         |
| SF3B2     | Splicing Factor 3b Subunit 2                 | Protein Coding | 40 | GC11P066050 | 8.181301 | <a href="https://www.genecards.org/cgi-bin/carddisp.pl?gene=SF3B2">https://www.genecards.org/cgi-bin/carddisp.pl?gene=SF3B2</a>         |
| MTA1      | Metastasis Associated 1                      | Protein Coding | 43 | GC14P105419 | 8.178825 | <a href="https://www.genecards.org/cgi-bin/carddisp.pl?gene=MTA1">https://www.genecards.org/cgi-bin/carddisp.pl?gene=MTA1</a>           |
| TBX2      | T-Box Transcription Factor 2                 | Protein Coding | 45 | GC17P061399 | 8.178806 | <a href="https://www.genecards.org/cgi-bin/carddisp.pl?gene=TBX2">https://www.genecards.org/cgi-bin/carddisp.pl?gene=TBX2</a>           |
| CD151     | CD151 Molecule (Raph Blood Group)            | Protein Coding | 46 | GC11P000996 | 8.178188 | <a href="https://www.genecards.org/cgi-bin/carddisp.pl?gene=CD151">https://www.genecards.org/cgi-bin/carddisp.pl?gene=CD151</a>         |
| CD3E      | CD3e Molecule                                | Protein Coding | 47 | GC11P118304 | 8.174352 | <a href="https://www.genecards.org/cgi-bin/carddisp.pl?gene=CD3E">https://www.genecards.org/cgi-bin/carddisp.pl?gene=CD3E</a>           |
| SOX4      | SRY-Box Transcription Factor 4               | Protein Coding | 44 | GC06P021593 | 8.172842 | <a href="https://www.genecards.org/cgi-bin/carddisp.pl?gene=SOX4">https://www.genecards.org/cgi-bin/carddisp.pl?gene=SOX4</a>           |
| MIR590    | MicroRNA 590                                 | RNA Gene       | 18 | GC07P074191 | 8.172476 | <a href="https://www.genecards.org/cgi-bin/carddisp.pl?gene=MIR590">https://www.genecards.org/cgi-bin/carddisp.pl?gene=MIR590</a>       |
| ITLN1     | Intelectin 1                                 | Protein Coding | 39 | GC01M160876 | 8.169151 | <a href="https://www.genecards.org/cgi-bin/carddisp.pl?gene=ITLN1">https://www.genecards.org/cgi-bin/carddisp.pl?gene=ITLN1</a>         |
| IL27      | Interleukin 27                               | Protein Coding | 38 | GC16M028514 | 8.163682 | <a href="https://www.genecards.org/cgi-bin/carddisp.pl?gene=IL27">https://www.genecards.org/cgi-bin/carddisp.pl?gene=IL27</a>           |
| IGFBP5    | Insulin Like Growth Factor Binding Protein 5 | Protein Coding | 43 | GC02M216672 | 8.163429 | <a href="https://www.genecards.org/cgi-bin/carddisp.pl?gene=IGFBP5">https://www.genecards.org/cgi-bin/carddisp.pl?gene=IGFBP5</a>       |
| PPM1G     | Protein Phosphatase, Mg2+/Mn2+ Dependent 1G  | Protein Coding | 43 | GC02M027399 | 8.16276  | <a href="https://www.genecards.org/cgi-bin/carddisp.pl?gene=PPM1G">https://www.genecards.org/cgi-bin/carddisp.pl?gene=PPM1G</a>         |
| PSMC2     | Proteasome 26S Subunit, ATPase 2             | Protein Coding | 41 | GC07P103344 | 8.161751 | <a href="https://www.genecards.org/cgi-bin/carddisp.pl?gene=PSMC2">https://www.genecards.org/cgi-bin/carddisp.pl?gene=PSMC2</a>         |
| FOXL2     | Forkhead Box L2                              | Protein Coding | 41 | GC03M138944 | 8.161029 | <a href="https://www.genecards.org/cgi-bin/carddisp.pl?gene=FOXL2">https://www.genecards.org/cgi-bin/carddisp.pl?gene=FOXL2</a>         |
| SERPINA12 | Serpin Family A Member 12                    | Protein Coding | 38 | GC14M095825 | 8.160327 | <a href="https://www.genecards.org/cgi-bin/carddisp.pl?gene=SERPINA12">https://www.genecards.org/cgi-bin/carddisp.pl?gene=SERPINA12</a> |
| PER3      | Period Circadian Regulator 3                 | Protein Coding | 44 | GC01P007785 | 8.159691 | <a href="https://www.genecards.org/cgi-bin/carddisp.pl?gene=PER3">https://www.genecards.org/cgi-bin/carddisp.pl?gene=PER3</a>           |
| MTAP      | Methylthioadenosine Phosphorylase            | Protein Coding | 48 | GC09P021792 | 8.159391 | <a href="https://www.genecards.org/cgi-bin/carddisp.pl?gene=MTAP">https://www.genecards.org/cgi-bin/carddisp.pl?gene=MTAP</a>           |
| BRD4      | Bromodomain Containing 4                     | Protein Coding | 46 | GC19M015236 | 8.156195 | <a href="https://www.genecards.org/cgi-bin/carddisp.pl?gene=BRD4">https://www.genecards.org/cgi-bin/carddisp.pl?gene=BRD4</a>           |
| NUP214    | Nucleoporin 214                              | Protein Coding | 44 | GC09P131125 | 8.15501  | <a href="https://www.genecards.org/cgi-bin/carddisp.pl?gene=NUP214">https://www.genecards.org/cgi-bin/carddisp.pl?gene=NUP214</a>       |

|         |                                                                          |                   |    |                 |          |                                                                                                                                     |
|---------|--------------------------------------------------------------------------|-------------------|----|-----------------|----------|-------------------------------------------------------------------------------------------------------------------------------------|
| A1CF    | APOBEC1<br>Complementati<br>on Factor                                    | Protein<br>Coding | 37 | GC10M050<br>799 | 8.146441 | <a href="https://www.genecards.org/cgi-bin/carddisp.pl?gene=A1CF">https://www.genecards.org/cgi-bin/carddisp.pl?gene=A1CF</a>       |
| SYT1    | Synaptotagmin<br>1                                                       | Protein<br>Coding | 48 | GC12P0788<br>63 | 8.142479 | <a href="https://www.genecards.org/cgi-bin/carddisp.pl?gene=SYT1">https://www.genecards.org/cgi-bin/carddisp.pl?gene=SYT1</a>       |
| ULK1    | Unc-51 Like<br>Autophagy<br>Activating<br>Kinase 1                       | Protein<br>Coding | 45 | GC12P1318<br>94 | 8.140206 | <a href="https://www.genecards.org/cgi-bin/carddisp.pl?gene=ULK1">https://www.genecards.org/cgi-bin/carddisp.pl?gene=ULK1</a>       |
| RPS27   | Ribosomal<br>Protein S27                                                 | Protein<br>Coding | 43 | GC01P1539<br>91 | 8.128654 | <a href="https://www.genecards.org/cgi-bin/carddisp.pl?gene=RPS27">https://www.genecards.org/cgi-bin/carddisp.pl?gene=RPS27</a>     |
| REG1A   | Regenerating<br>Family Member<br>1 Alpha                                 | Protein<br>Coding | 41 | GC02P0791<br>20 | 8.12756  | <a href="https://www.genecards.org/cgi-bin/carddisp.pl?gene=REG1A">https://www.genecards.org/cgi-bin/carddisp.pl?gene=REG1A</a>     |
| COLEC10 | Collectin<br>Subfamily<br>Member 10                                      | Protein<br>Coding | 40 | GC08P1189<br>52 | 8.124879 | <a href="https://www.genecards.org/cgi-bin/carddisp.pl?gene=COLEC10">https://www.genecards.org/cgi-bin/carddisp.pl?gene=COLEC10</a> |
| KCNN3   | Potassium<br>Calcium-<br>Activated<br>Channel<br>Subfamily N<br>Member 3 | Protein<br>Coding | 45 | GC01M154<br>697 | 8.123093 | <a href="https://www.genecards.org/cgi-bin/carddisp.pl?gene=KCNN3">https://www.genecards.org/cgi-bin/carddisp.pl?gene=KCNN3</a>     |
| DBN1    | Drebrin 1                                                                | Protein<br>Coding | 40 | GC05M177<br>456 | 8.118693 | <a href="https://www.genecards.org/cgi-bin/carddisp.pl?gene=DBN1">https://www.genecards.org/cgi-bin/carddisp.pl?gene=DBN1</a>       |
| SSB     | Small RNA<br>Binding<br>Exonuclease<br>Protection<br>Factor La           | Protein<br>Coding | 43 | GC02P1697<br>91 | 8.116309 | <a href="https://www.genecards.org/cgi-bin/carddisp.pl?gene=SSB">https://www.genecards.org/cgi-bin/carddisp.pl?gene=SSB</a>         |
| ALDH6A1 | Aldehyde<br>Dehydrogenase<br>6 Family<br>Member A1                       | Protein<br>Coding | 47 | GC14M074<br>059 | 8.115782 | <a href="https://www.genecards.org/cgi-bin/carddisp.pl?gene=ALDH6A1">https://www.genecards.org/cgi-bin/carddisp.pl?gene=ALDH6A1</a> |
| CLEC16A | C-Type Lectin<br>Domain<br>Containing 16A                                | Protein<br>Coding | 37 | GC16P0109<br>44 | 8.111161 | <a href="https://www.genecards.org/cgi-bin/carddisp.pl?gene=CLEC16A">https://www.genecards.org/cgi-bin/carddisp.pl?gene=CLEC16A</a> |
| NPEPPS  | Aminopeptidas<br>e Puromycin<br>Sensitive                                | Protein<br>Coding | 42 | GC17P0475<br>22 | 8.109356 | <a href="https://www.genecards.org/cgi-bin/carddisp.pl?gene=NPEPPS">https://www.genecards.org/cgi-bin/carddisp.pl?gene=NPEPPS</a>   |
| KDM1A   | Lysine<br>Demethylase<br>1A                                              | Protein<br>Coding | 48 | GC01P0230<br>19 | 8.106125 | <a href="https://www.genecards.org/cgi-bin/carddisp.pl?gene=KDM1A">https://www.genecards.org/cgi-bin/carddisp.pl?gene=KDM1A</a>     |
| CYP2A13 | Cytochrome<br>P450 Family 2<br>Subfamily A<br>Member 13                  | Protein<br>Coding | 42 | GC19P0410<br>88 | 8.105606 | <a href="https://www.genecards.org/cgi-bin/carddisp.pl?gene=CYP2A13">https://www.genecards.org/cgi-bin/carddisp.pl?gene=CYP2A13</a> |
| RPS6    | Ribosomal<br>Protein S6                                                  | Protein<br>Coding | 44 | GC09M019<br>375 | 8.104778 | <a href="https://www.genecards.org/cgi-bin/carddisp.pl?gene=RPS6">https://www.genecards.org/cgi-bin/carddisp.pl?gene=RPS6</a>       |
| HCCS    | Holocytochrom<br>e C Synthase                                            | Protein<br>Coding | 42 | GC0XP0111<br>11 | 8.102562 | <a href="https://www.genecards.org/cgi-bin/carddisp.pl?gene=HCCS">https://www.genecards.org/cgi-bin/carddisp.pl?gene=HCCS</a>       |
| MAP3K8  | Mitogen-<br>Activated<br>Protein Kinase<br>Kinase Kinase 8               | Protein<br>Coding | 47 | GC10P0304<br>58 | 8.100418 | <a href="https://www.genecards.org/cgi-bin/carddisp.pl?gene=MAP3K8">https://www.genecards.org/cgi-bin/carddisp.pl?gene=MAP3K8</a>   |

|          |                                          |                |    |             |          |                                                                                                                                       |
|----------|------------------------------------------|----------------|----|-------------|----------|---------------------------------------------------------------------------------------------------------------------------------------|
| SLC6A9   | Solute Carrier Family 6 Member 9 Protein | Protein Coding | 50 | GC01M043991 | 8.098776 | <a href="https://www.genecards.org/cgi-bin/carddisp.pl?gene=SLC6A9">https://www.genecards.org/cgi-bin/carddisp.pl?gene=SLC6A9</a>     |
| PPP5C    | Phosphatase 5 Catalytic Subunit          | Protein Coding | 45 | GC19P046346 | 8.093467 | <a href="https://www.genecards.org/cgi-bin/carddisp.pl?gene=PPP5C">https://www.genecards.org/cgi-bin/carddisp.pl?gene=PPP5C</a>       |
| LSS      | Lanosterol Synthase                      | Protein Coding | 46 | GC21M048323 | 8.092251 | <a href="https://www.genecards.org/cgi-bin/carddisp.pl?gene=LSS">https://www.genecards.org/cgi-bin/carddisp.pl?gene=LSS</a>           |
| STEAP4   | STEAP4 Metalloreductase                  | Protein Coding | 41 | GC07M088315 | 8.090548 | <a href="https://www.genecards.org/cgi-bin/carddisp.pl?gene=STEAP4">https://www.genecards.org/cgi-bin/carddisp.pl?gene=STEAP4</a>     |
| UROC1    | Urocanate Hydratase 1                    | Protein Coding | 40 | GC03M126481 | 8.083823 | <a href="https://www.genecards.org/cgi-bin/carddisp.pl?gene=UROC1">https://www.genecards.org/cgi-bin/carddisp.pl?gene=UROC1</a>       |
| PEG10    | Paternally Expressed 10 Chromosome       | Protein Coding | 41 | GC07P094656 | 8.078861 | <a href="https://www.genecards.org/cgi-bin/carddisp.pl?gene=PEG10">https://www.genecards.org/cgi-bin/carddisp.pl?gene=PEG10</a>       |
| C12orf57 | 12 Open Reading Frame 57                 | Protein Coding | 37 | GC12P011870 | 8.078166 | <a href="https://www.genecards.org/cgi-bin/carddisp.pl?gene=C12orf57">https://www.genecards.org/cgi-bin/carddisp.pl?gene=C12orf57</a> |
| ABRAXAS1 | Abraxas 1, BRCA1 A Complex Subunit       | Protein Coding | 30 | GC04M083460 | 8.053703 | <a href="https://www.genecards.org/cgi-bin/carddisp.pl?gene=ABRAXAS1">https://www.genecards.org/cgi-bin/carddisp.pl?gene=ABRAXAS1</a> |
| AMPH     | Amphiphysin                              | Protein Coding | 45 | GC07M038782 | 8.049717 | <a href="https://www.genecards.org/cgi-bin/carddisp.pl?gene=AMPH">https://www.genecards.org/cgi-bin/carddisp.pl?gene=AMPH</a>         |
| AHNAK    | AHNAK Nucleoprotein                      | Protein Coding | 37 | GC11M069238 | 8.047614 | <a href="https://www.genecards.org/cgi-bin/carddisp.pl?gene=AHNAK">https://www.genecards.org/cgi-bin/carddisp.pl?gene=AHNAK</a>       |
| PTGR1    | Prostaglandin Reductase 1                | Protein Coding | 43 | GC09M111549 | 8.04496  | <a href="https://www.genecards.org/cgi-bin/carddisp.pl?gene=PTGR1">https://www.genecards.org/cgi-bin/carddisp.pl?gene=PTGR1</a>       |
| GAB1     | GRB2 Associated Binding Protein 1        | Protein Coding | 45 | GC04P143336 | 8.042448 | <a href="https://www.genecards.org/cgi-bin/carddisp.pl?gene=GAB1">https://www.genecards.org/cgi-bin/carddisp.pl?gene=GAB1</a>         |
| AURKB    | Aurora Kinase B                          | Protein Coding | 50 | GC17M009194 | 8.041707 | <a href="https://www.genecards.org/cgi-bin/carddisp.pl?gene=AURKB">https://www.genecards.org/cgi-bin/carddisp.pl?gene=AURKB</a>       |
| SPHK2    | Sphingosine Kinase 2                     | Protein Coding | 45 | GC19P048619 | 8.038082 | <a href="https://www.genecards.org/cgi-bin/carddisp.pl?gene=SPHK2">https://www.genecards.org/cgi-bin/carddisp.pl?gene=SPHK2</a>       |
| MSX2     | Msh Homeobox 2                           | Protein Coding | 48 | GC05P174724 | 8.038054 | <a href="https://www.genecards.org/cgi-bin/carddisp.pl?gene=MSX2">https://www.genecards.org/cgi-bin/carddisp.pl?gene=MSX2</a>         |
| TFPI     | Tissue Factor Pathway Inhibitor          | Protein Coding | 45 | GC02M187464 | 8.02977  | <a href="https://www.genecards.org/cgi-bin/carddisp.pl?gene=TFPI">https://www.genecards.org/cgi-bin/carddisp.pl?gene=TFPI</a>         |
| TRIM5    | Tripartite Motif Containing 5            | Protein Coding | 42 | GC11M005753 | 8.029466 | <a href="https://www.genecards.org/cgi-bin/carddisp.pl?gene=TRIM5">https://www.genecards.org/cgi-bin/carddisp.pl?gene=TRIM5</a>       |
| PXN      | Paxillin                                 | Protein Coding | 46 | GC12M120210 | 8.022019 | <a href="https://www.genecards.org/cgi-bin/carddisp.pl?gene=PXN">https://www.genecards.org/cgi-bin/carddisp.pl?gene=PXN</a>           |
| EPHA3    | EPH Receptor A3                          | Protein Coding | 47 | GC03P089077 | 8.020586 | <a href="https://www.genecards.org/cgi-bin/carddisp.pl?gene=EPHA3">https://www.genecards.org/cgi-bin/carddisp.pl?gene=EPHA3</a>       |
| MADD     | MAP Kinase Activating Death Domain       | Protein Coding | 42 | GC11P047290 | 8.008732 | <a href="https://www.genecards.org/cgi-bin/carddisp.pl?gene=MADD">https://www.genecards.org/cgi-bin/carddisp.pl?gene=MADD</a>         |
| FCER2    | Fc Fragment Of IgE Receptor II           | Protein Coding | 45 | GC19M007689 | 7.998783 | <a href="https://www.genecards.org/cgi-bin/carddisp.pl?gene=FCER2">https://www.genecards.org/cgi-bin/carddisp.pl?gene=FCER2</a>       |

|         |                                                                              |                |    |             |          |                                                                                                                                     |
|---------|------------------------------------------------------------------------------|----------------|----|-------------|----------|-------------------------------------------------------------------------------------------------------------------------------------|
| HSD3B2  | Hydroxy-Delta-5-Steroid Dehydrogenase, 3 Beta- And Steroid Delta-Isomerase 2 | Protein Coding | 47 | GC01P119414 | 7.996996 | <a href="https://www.genecards.org/cgi-bin/carddisp.pl?gene=HSD3B2">https://www.genecards.org/cgi-bin/carddisp.pl?gene=HSD3B2</a>   |
| DMP1    | Dentin Matrix Acidic Phosphoprotein 1                                        | Protein Coding | 42 | GC04P087650 | 7.978456 | <a href="https://www.genecards.org/cgi-bin/carddisp.pl?gene=DMP1">https://www.genecards.org/cgi-bin/carddisp.pl?gene=DMP1</a>       |
| NPY5R   | Neuropeptide Y Receptor Y5                                                   | Protein Coding | 43 | GC04P163343 | 7.978161 | <a href="https://www.genecards.org/cgi-bin/carddisp.pl?gene=NPY5R">https://www.genecards.org/cgi-bin/carddisp.pl?gene=NPY5R</a>     |
| DROSHA  | Drosha Ribonuclease III                                                      | Protein Coding | 43 | GC05M031401 | 7.977524 | <a href="https://www.genecards.org/cgi-bin/carddisp.pl?gene=DROSHA">https://www.genecards.org/cgi-bin/carddisp.pl?gene=DROSHA</a>   |
| SLC44A1 | Solute Carrier Family 44 Member 1                                            | Protein Coding | 45 | GC09P105244 | 7.974358 | <a href="https://www.genecards.org/cgi-bin/carddisp.pl?gene=SLC44A1">https://www.genecards.org/cgi-bin/carddisp.pl?gene=SLC44A1</a> |
| APH1A   | Aph-1 Homolog A, Gamma-Secretase Subunit                                     | Protein Coding | 43 | GC01M150265 | 7.97285  | <a href="https://www.genecards.org/cgi-bin/carddisp.pl?gene=APH1A">https://www.genecards.org/cgi-bin/carddisp.pl?gene=APH1A</a>     |
| TRPC1   | Transient Receptor Potential Cation Channel Subfamily C Member 1             | Protein Coding | 43 | GC03P142724 | 7.968467 | <a href="https://www.genecards.org/cgi-bin/carddisp.pl?gene=TRPC1">https://www.genecards.org/cgi-bin/carddisp.pl?gene=TRPC1</a>     |
| POLE    | DNA Polymerase Epsilon, Catalytic Subunit                                    | Protein Coding | 50 | GC12M132637 | 7.966372 | <a href="https://www.genecards.org/cgi-bin/carddisp.pl?gene=POLE">https://www.genecards.org/cgi-bin/carddisp.pl?gene=POLE</a>       |
| HELLS   | Helicase, Lymphoid Specific                                                  | Protein Coding | 46 | GC10P094501 | 7.965317 | <a href="https://www.genecards.org/cgi-bin/carddisp.pl?gene=HELLS">https://www.genecards.org/cgi-bin/carddisp.pl?gene=HELLS</a>     |
| PLD2    | Phospholipase D2                                                             | Protein Coding | 48 | GC17P004808 | 7.964011 | <a href="https://www.genecards.org/cgi-bin/carddisp.pl?gene=PLD2">https://www.genecards.org/cgi-bin/carddisp.pl?gene=PLD2</a>       |
| STAG2   | Stromal Antigen 2                                                            | Protein Coding | 45 | GC0XP123960 | 7.958353 | <a href="https://www.genecards.org/cgi-bin/carddisp.pl?gene=STAG2">https://www.genecards.org/cgi-bin/carddisp.pl?gene=STAG2</a>     |
| YWHAG   | Tyrosine 3-Monooxygenase/Tryptophan 5-Monooxygenase Activation Protein Gamma | Protein Coding | 50 | GC07M076327 | 7.955872 | <a href="https://www.genecards.org/cgi-bin/carddisp.pl?gene=YWHAG">https://www.genecards.org/cgi-bin/carddisp.pl?gene=YWHAG</a>     |
| CHRNA7  | Cholinergic Receptor Nicotinic Gamma Subunit                                 | Protein Coding | 41 | GC02P232539 | 7.953361 | <a href="https://www.genecards.org/cgi-bin/carddisp.pl?gene=CHRNA7">https://www.genecards.org/cgi-bin/carddisp.pl?gene=CHRNA7</a>   |

|         |                                                           |                |    |             |          |                                                                                                                                     |
|---------|-----------------------------------------------------------|----------------|----|-------------|----------|-------------------------------------------------------------------------------------------------------------------------------------|
| DMGDH   | Dimethylglycine Dehydrogenase                             | Protein Coding | 44 | GC05M078997 | 7.953049 | <a href="https://www.genecards.org/cgi-bin/carddisp.pl?gene=DMGDH">https://www.genecards.org/cgi-bin/carddisp.pl?gene=DMGDH</a>     |
| ZNF365  | Zinc Finger Protein 365                                   | Protein Coding | 38 | GC10P062374 | 7.95028  | <a href="https://www.genecards.org/cgi-bin/carddisp.pl?gene=ZNF365">https://www.genecards.org/cgi-bin/carddisp.pl?gene=ZNF365</a>   |
| SYNPO   | Synaptopodin                                              | Protein Coding | 38 | GC05P150601 | 7.948679 | <a href="https://www.genecards.org/cgi-bin/carddisp.pl?gene=SYNPO">https://www.genecards.org/cgi-bin/carddisp.pl?gene=SYNPO</a>     |
| PRKAB2  | Protein Kinase AMP-Activated Non-Catalytic Subunit Beta 2 | Protein Coding | 47 | GC01M147155 | 7.947288 | <a href="https://www.genecards.org/cgi-bin/carddisp.pl?gene=PRKAB2">https://www.genecards.org/cgi-bin/carddisp.pl?gene=PRKAB2</a>   |
| PITX3   | Paired Like Homeodomain 3                                 | Protein Coding | 41 | GC10M102230 | 7.943286 | <a href="https://www.genecards.org/cgi-bin/carddisp.pl?gene=PITX3">https://www.genecards.org/cgi-bin/carddisp.pl?gene=PITX3</a>     |
| CD22    | CD22 Molecule                                             | Protein Coding | 46 | GC19P035319 | 7.941979 | <a href="https://www.genecards.org/cgi-bin/carddisp.pl?gene=CD22">https://www.genecards.org/cgi-bin/carddisp.pl?gene=CD22</a>       |
| E2F3    | E2F Transcription Factor 3                                | Protein Coding | 43 | GC06P020402 | 7.941366 | <a href="https://www.genecards.org/cgi-bin/carddisp.pl?gene=E2F3">https://www.genecards.org/cgi-bin/carddisp.pl?gene=E2F3</a>       |
| PPP1R3A | Protein Phosphatase 1 Regulatory Subunit 3A               | Protein Coding | 43 | GC07M113876 | 7.940125 | <a href="https://www.genecards.org/cgi-bin/carddisp.pl?gene=PPP1R3A">https://www.genecards.org/cgi-bin/carddisp.pl?gene=PPP1R3A</a> |
| MIR675  | MicroRNA 675                                              | RNA Gene       | 16 | GC11M001997 | 7.937644 | <a href="https://www.genecards.org/cgi-bin/carddisp.pl?gene=MIR675">https://www.genecards.org/cgi-bin/carddisp.pl?gene=MIR675</a>   |
| FAM20C  | FAM20C Golgi Associated Secretory Pathway Kinase          | Protein Coding | 42 | GC07P000192 | 7.936943 | <a href="https://www.genecards.org/cgi-bin/carddisp.pl?gene=FAM20C">https://www.genecards.org/cgi-bin/carddisp.pl?gene=FAM20C</a>   |
| MAPK12  | Mitogen-Activated Protein Kinase 12                       | Protein Coding | 49 | GC22M050246 | 7.930736 | <a href="https://www.genecards.org/cgi-bin/carddisp.pl?gene=MAPK12">https://www.genecards.org/cgi-bin/carddisp.pl?gene=MAPK12</a>   |
| MIR491  | MicroRNA 491                                              | RNA Gene       | 19 | GC09P020716 | 7.929972 | <a href="https://www.genecards.org/cgi-bin/carddisp.pl?gene=MIR491">https://www.genecards.org/cgi-bin/carddisp.pl?gene=MIR491</a>   |
| AFF4    | AF4/FMR2 Family Member 4                                  | Protein Coding | 42 | GC05M132875 | 7.928484 | <a href="https://www.genecards.org/cgi-bin/carddisp.pl?gene=AFF4">https://www.genecards.org/cgi-bin/carddisp.pl?gene=AFF4</a>       |
| CCT5    | Chaperonin Containing TCP1 Subunit 5                      | Protein Coding | 45 | GC05P010236 | 7.923199 | <a href="https://www.genecards.org/cgi-bin/carddisp.pl?gene=CCT5">https://www.genecards.org/cgi-bin/carddisp.pl?gene=CCT5</a>       |
| PPP2CA  | Protein Phosphatase 2 Catalytic Subunit Alpha             | Protein Coding | 50 | GC05M134194 | 7.920739 | <a href="https://www.genecards.org/cgi-bin/carddisp.pl?gene=PPP2CA">https://www.genecards.org/cgi-bin/carddisp.pl?gene=PPP2CA</a>   |
| SRCAP   | Snf2 Related CREBBP Activator Protein                     | Protein Coding | 40 | GC16P032468 | 7.912808 | <a href="https://www.genecards.org/cgi-bin/carddisp.pl?gene=SRCAP">https://www.genecards.org/cgi-bin/carddisp.pl?gene=SRCAP</a>     |
| SETDB1  | SET Domain Bifurcated Histone Lysine Methyltransferase 1  | Protein Coding | 43 | GC01P150926 | 7.899225 | <a href="https://www.genecards.org/cgi-bin/carddisp.pl?gene=SETDB1">https://www.genecards.org/cgi-bin/carddisp.pl?gene=SETDB1</a>   |

|         |                                                   |                |    |             |          |                                                                                                                                     |
|---------|---------------------------------------------------|----------------|----|-------------|----------|-------------------------------------------------------------------------------------------------------------------------------------|
| CAV2    | Caveolin 2                                        | Protein Coding | 43 | GC07P116287 | 7.898973 | <a href="https://www.genecards.org/cgi-bin/carddisp.pl?gene=CAV2">https://www.genecards.org/cgi-bin/carddisp.pl?gene=CAV2</a>       |
| PROP1   | PROP Paired-Like Homeobox 1                       | Protein Coding | 41 | GC05M177992 | 7.895069 | <a href="https://www.genecards.org/cgi-bin/carddisp.pl?gene=PROP1">https://www.genecards.org/cgi-bin/carddisp.pl?gene=PROP1</a>     |
| PXK     | PX Domain Containing Serine/Threonine Kinase Like | Protein Coding | 39 | GC03P058333 | 7.895031 | <a href="https://www.genecards.org/cgi-bin/carddisp.pl?gene=PXK">https://www.genecards.org/cgi-bin/carddisp.pl?gene=PXK</a>         |
| CALM2   | Calmodulin 2                                      | Protein Coding | 45 | GC02M047124 | 7.892985 | <a href="https://www.genecards.org/cgi-bin/carddisp.pl?gene=CALM2">https://www.genecards.org/cgi-bin/carddisp.pl?gene=CALM2</a>     |
| MYT1L   | Myelin Transcription Factor 1 Like                | Protein Coding | 41 | GC02M001789 | 7.88828  | <a href="https://www.genecards.org/cgi-bin/carddisp.pl?gene=MYT1L">https://www.genecards.org/cgi-bin/carddisp.pl?gene=MYT1L</a>     |
| UBE3B   | Ubiquitin Protein Ligase E3B                      | Protein Coding | 44 | GC12P109477 | 7.882938 | <a href="https://www.genecards.org/cgi-bin/carddisp.pl?gene=UBE3B">https://www.genecards.org/cgi-bin/carddisp.pl?gene=UBE3B</a>     |
| ISL1    | ISL LIM Homeobox 1                                | Protein Coding | 47 | GC05P051383 | 7.878289 | <a href="https://www.genecards.org/cgi-bin/carddisp.pl?gene=ISL1">https://www.genecards.org/cgi-bin/carddisp.pl?gene=ISL1</a>       |
| DLG3    | Discs Large MAGUK Scaffold Protein 3              | Protein Coding | 43 | GC0XP070444 | 7.875561 | <a href="https://www.genecards.org/cgi-bin/carddisp.pl?gene=DLG3">https://www.genecards.org/cgi-bin/carddisp.pl?gene=DLG3</a>       |
| AQP3    | Aquaporin 3 (Gill Blood Group)                    | Protein Coding | 48 | GC09M033431 | 7.875342 | <a href="https://www.genecards.org/cgi-bin/carddisp.pl?gene=AQP3">https://www.genecards.org/cgi-bin/carddisp.pl?gene=AQP3</a>       |
| CDSN    | Corneodesmosin                                    | Protein Coding | 41 | GC06M031115 | 7.871379 | <a href="https://www.genecards.org/cgi-bin/carddisp.pl?gene=CDSN">https://www.genecards.org/cgi-bin/carddisp.pl?gene=CDSN</a>       |
| FRMD4A  | FERM Domain Containing 4A                         | Protein Coding | 37 | GC10M013643 | 7.870653 | <a href="https://www.genecards.org/cgi-bin/carddisp.pl?gene=FRMD4A">https://www.genecards.org/cgi-bin/carddisp.pl?gene=FRMD4A</a>   |
| NDUFA4  | NDUFA4 Mitochondrial Complex Associated           | Protein Coding | 44 | GC07M010938 | 7.867542 | <a href="https://www.genecards.org/cgi-bin/carddisp.pl?gene=NDUFA4">https://www.genecards.org/cgi-bin/carddisp.pl?gene=NDUFA4</a>   |
| NRG3    | Neuregulin 3                                      | Protein Coding | 43 | GC10P085390 | 7.864625 | <a href="https://www.genecards.org/cgi-bin/carddisp.pl?gene=NRG3">https://www.genecards.org/cgi-bin/carddisp.pl?gene=NRG3</a>       |
| PLAG1   | PLAG1 Zinc Finger                                 | Protein Coding | 40 | GC08M056161 | 7.863031 | <a href="https://www.genecards.org/cgi-bin/carddisp.pl?gene=PLAG1">https://www.genecards.org/cgi-bin/carddisp.pl?gene=PLAG1</a>     |
| MAGED2  | MAGE Family Member D2                             | Protein Coding | 40 | GC0XP054807 | 7.861149 | <a href="https://www.genecards.org/cgi-bin/carddisp.pl?gene=MAGED2">https://www.genecards.org/cgi-bin/carddisp.pl?gene=MAGED2</a>   |
| PLK1    | Polo Like Kinase 1                                | Protein Coding | 50 | GC16P023958 | 7.860513 | <a href="https://www.genecards.org/cgi-bin/carddisp.pl?gene=PLK1">https://www.genecards.org/cgi-bin/carddisp.pl?gene=PLK1</a>       |
| DUOX1   | Dual Oxidase 1                                    | Protein Coding | 42 | GC15P045129 | 7.850125 | <a href="https://www.genecards.org/cgi-bin/carddisp.pl?gene=DUOX1">https://www.genecards.org/cgi-bin/carddisp.pl?gene=DUOX1</a>     |
| PSMD10  | Proteasome 26S Subunit, Non-ATPase 10             | Protein Coding | 41 | GC0XM108084 | 7.84796  | <a href="https://www.genecards.org/cgi-bin/carddisp.pl?gene=PSMD10">https://www.genecards.org/cgi-bin/carddisp.pl?gene=PSMD10</a>   |
| XIST    | X Inactive Specific Transcript                    | RNA Gene       | 24 | GC0XM073820 | 7.84722  | <a href="https://www.genecards.org/cgi-bin/carddisp.pl?gene=XIST">https://www.genecards.org/cgi-bin/carddisp.pl?gene=XIST</a>       |
| SLC25A3 | Solute Carrier Family 25 Member 3                 | Protein Coding | 45 | GC12P098593 | 7.846549 | <a href="https://www.genecards.org/cgi-bin/carddisp.pl?gene=SLC25A3">https://www.genecards.org/cgi-bin/carddisp.pl?gene=SLC25A3</a> |



|         |                                                                                                                  |                   |    |                 |          |                                                                                                                                     |
|---------|------------------------------------------------------------------------------------------------------------------|-------------------|----|-----------------|----------|-------------------------------------------------------------------------------------------------------------------------------------|
| PAM     | Peptidylglycine<br>Alpha-<br>Amidating<br>Monooxygenase                                                          | Protein<br>Coding | 44 | GC05P1027<br>53 | 7.84424  | <a href="https://www.genecards.org/cgi-bin/carddisp.pl?gene=PAM">https://www.genecards.org/cgi-bin/carddisp.pl?gene=PAM</a>         |
| HMMR    | Hyaluronan<br>Mediated<br>Motility<br>Receptor                                                                   | Protein<br>Coding | 43 | GC05P1634<br>80 | 7.843009 | <a href="https://www.genecards.org/cgi-bin/carddisp.pl?gene=HMMR">https://www.genecards.org/cgi-bin/carddisp.pl?gene=HMMR</a>       |
| APOBEC1 | Apolipoprotein<br>B mRNA<br>Editing Enzyme<br>Catalytic<br>Subunit 1                                             | Protein<br>Coding | 39 | GC12M007<br>649 | 7.839725 | <a href="https://www.genecards.org/cgi-bin/carddisp.pl?gene=APOBEC1">https://www.genecards.org/cgi-bin/carddisp.pl?gene=APOBEC1</a> |
| ARHGEF2 | Rho/Rac<br>Guanine<br>Nucleotide<br>Exchange<br>Factor 2                                                         | Protein<br>Coding | 47 | GC01M155<br>946 | 7.837776 | <a href="https://www.genecards.org/cgi-bin/carddisp.pl?gene=ARHGEF2">https://www.genecards.org/cgi-bin/carddisp.pl?gene=ARHGEF2</a> |
| TBCD    | Tubulin Folding<br>Cofactor D                                                                                    | Protein<br>Coding | 41 | GC17P0827<br>52 | 7.82603  | <a href="https://www.genecards.org/cgi-bin/carddisp.pl?gene=TBCD">https://www.genecards.org/cgi-bin/carddisp.pl?gene=TBCD</a>       |
| PAK4    | P21 (RAC1)<br>Activated<br>Kinase 4                                                                              | Protein<br>Coding | 49 | GC19P0391<br>25 | 7.82106  | <a href="https://www.genecards.org/cgi-bin/carddisp.pl?gene=PAK4">https://www.genecards.org/cgi-bin/carddisp.pl?gene=PAK4</a>       |
| TRAF1   | TNF Receptor<br>Associated<br>Factor 1                                                                           | Protein<br>Coding | 44 | GC09M120<br>902 | 7.819151 | <a href="https://www.genecards.org/cgi-bin/carddisp.pl?gene=TRAF1">https://www.genecards.org/cgi-bin/carddisp.pl?gene=TRAF1</a>     |
| RPL27   | Ribosomal<br>Protein L27                                                                                         | Protein<br>Coding | 43 | GC17P0429<br>98 | 7.817882 | <a href="https://www.genecards.org/cgi-bin/carddisp.pl?gene=RPL27">https://www.genecards.org/cgi-bin/carddisp.pl?gene=RPL27</a>     |
| TMCO1   | Transmembrane<br>And Coiled-<br>Coil Domains 1<br>AUP1 Lipid<br>Droplet<br>Regulating<br>VLDL Assembly<br>Factor | Protein<br>Coding | 40 | GC01M165<br>724 | 7.812384 | <a href="https://www.genecards.org/cgi-bin/carddisp.pl?gene=TMCO1">https://www.genecards.org/cgi-bin/carddisp.pl?gene=TMCO1</a>     |
| AUP1    | Solute Carrier<br>Family 5<br>Member 6                                                                           | Protein<br>Coding | 47 | GC02M027<br>201 | 7.809017 | <a href="https://www.genecards.org/cgi-bin/carddisp.pl?gene=SLC5A6">https://www.genecards.org/cgi-bin/carddisp.pl?gene=SLC5A6</a>   |
| SLC5A6  | Podoplanin                                                                                                       | Protein<br>Coding | 40 | GC01P0135<br>83 | 7.803065 | <a href="https://www.genecards.org/cgi-bin/carddisp.pl?gene=PDPN">https://www.genecards.org/cgi-bin/carddisp.pl?gene=PDPN</a>       |
| PDPN    | Potassium<br>Inwardly<br>Rectifying<br>Channel<br>Subfamily J<br>Member 18                                       | Protein<br>Coding | 26 | GC17P0294<br>86 | 7.79836  | <a href="https://www.genecards.org/cgi-bin/carddisp.pl?gene=KCNJ18">https://www.genecards.org/cgi-bin/carddisp.pl?gene=KCNJ18</a>   |
| KCNJ18  | Glutathione S-<br>Transferase<br>Alpha 4                                                                         | Protein<br>Coding | 44 | GC06M052<br>977 | 7.798082 | <a href="https://www.genecards.org/cgi-bin/carddisp.pl?gene=GSTA4">https://www.genecards.org/cgi-bin/carddisp.pl?gene=GSTA4</a>     |
| GSTA4   | Speckle Type<br>BTB/POZ<br>Protein                                                                               | Protein<br>Coding | 44 | GC17M049<br>598 | 7.794477 | <a href="https://www.genecards.org/cgi-bin/carddisp.pl?gene=SPOP">https://www.genecards.org/cgi-bin/carddisp.pl?gene=SPOP</a>       |
| SPOP    | Ubiquitin Fold<br>Modifier 1                                                                                     | Protein<br>Coding | 41 | GC13P0383<br>49 | 7.78791  | <a href="https://www.genecards.org/cgi-bin/carddisp.pl?gene=UFM1">https://www.genecards.org/cgi-bin/carddisp.pl?gene=UFM1</a>       |
| UFM1    |                                                                                                                  |                   |    |                 |          |                                                                                                                                     |

|               |                                                         |                |    |             |          |                                                                                                                                                 |
|---------------|---------------------------------------------------------|----------------|----|-------------|----------|-------------------------------------------------------------------------------------------------------------------------------------------------|
| IGFBP7        | Insulin Like Growth Factor Binding Protein 7            | Protein Coding | 47 | GC04M057030 | 7.786259 | <a href="https://www.genecards.org/cgi-bin/carddisp.pl?gene=IGFBP7">https://www.genecards.org/cgi-bin/carddisp.pl?gene=IGFBP7</a>               |
| NDUFC2-KCTD14 | NDUFC2-KCTD14 Readthrough                               | Protein Coding | 22 | GC11M078015 | 7.785832 | <a href="https://www.genecards.org/cgi-bin/carddisp.pl?gene=NDUFC2-KCTD14">https://www.genecards.org/cgi-bin/carddisp.pl?gene=NDUFC2-KCTD14</a> |
| CKM           | Creatine Kinase, M-Type                                 | Protein Coding | 45 | GC19M045306 | 7.776155 | <a href="https://www.genecards.org/cgi-bin/carddisp.pl?gene=CKM">https://www.genecards.org/cgi-bin/carddisp.pl?gene=CKM</a>                     |
| ST6GAL1       | ST6 Beta-Galactoside Alpha-2,6-Sialyltransferase 1      | Protein Coding | 44 | GC03P186930 | 7.773654 | <a href="https://www.genecards.org/cgi-bin/carddisp.pl?gene=ST6GAL1">https://www.genecards.org/cgi-bin/carddisp.pl?gene=ST6GAL1</a>             |
| SNRNP70       | Small Nuclear Ribonucleoprotein U1 Subunit 70           | Protein Coding | 40 | GC19P049085 | 7.771424 | <a href="https://www.genecards.org/cgi-bin/carddisp.pl?gene=SNRNP70">https://www.genecards.org/cgi-bin/carddisp.pl?gene=SNRNP70</a>             |
| PHF8          | PHD Finger Protein 8                                    | Protein Coding | 42 | GC0XM053936 | 7.771198 | <a href="https://www.genecards.org/cgi-bin/carddisp.pl?gene=PHF8">https://www.genecards.org/cgi-bin/carddisp.pl?gene=PHF8</a>                   |
| FES           | FES Proto-Oncogene, Tyrosine Kinase                     | Protein Coding | 48 | GC15P090883 | 7.76962  | <a href="https://www.genecards.org/cgi-bin/carddisp.pl?gene=FES">https://www.genecards.org/cgi-bin/carddisp.pl?gene=FES</a>                     |
| HLA-DQA2      | Major Histocompatibility Complex, Class II, DQ Alpha 2  | Protein Coding | 37 | GC06P032741 | 7.766288 | <a href="https://www.genecards.org/cgi-bin/carddisp.pl?gene=HLA-DQA2">https://www.genecards.org/cgi-bin/carddisp.pl?gene=HLA-DQA2</a>           |
| LRP1B         | LDL Receptor Related Protein 1B                         | Protein Coding | 40 | GC02M140231 | 7.751904 | <a href="https://www.genecards.org/cgi-bin/carddisp.pl?gene=LRP1B">https://www.genecards.org/cgi-bin/carddisp.pl?gene=LRP1B</a>                 |
| LOXL2         | Lysyl Oxidase Like 2                                    | Protein Coding | 44 | GC08M023296 | 7.751643 | <a href="https://www.genecards.org/cgi-bin/carddisp.pl?gene=LOXL2">https://www.genecards.org/cgi-bin/carddisp.pl?gene=LOXL2</a>                 |
| VPS26A        | VPS26, Retromer Complex Component A                     | Protein Coding | 40 | GC10P069123 | 7.749689 | <a href="https://www.genecards.org/cgi-bin/carddisp.pl?gene=VPS26A">https://www.genecards.org/cgi-bin/carddisp.pl?gene=VPS26A</a>               |
| OLIG2         | Oligodendrocyte Transcription Factor 2                  | Protein Coding | 41 | GC21P033025 | 7.748407 | <a href="https://www.genecards.org/cgi-bin/carddisp.pl?gene=OLIG2">https://www.genecards.org/cgi-bin/carddisp.pl?gene=OLIG2</a>                 |
| RALGAPA1      | Ral GTPase Activating Protein Catalytic Subunit Alpha 1 | Protein Coding | 40 | GC14M035538 | 7.748217 | <a href="https://www.genecards.org/cgi-bin/carddisp.pl?gene=RALGAPA1">https://www.genecards.org/cgi-bin/carddisp.pl?gene=RALGAPA1</a>           |
| RAB3GAP2      | RAB3 GTPase Activating Non-Catalytic Protein Subunit 2  | Protein Coding | 40 | GC01M220149 | 7.741985 | <a href="https://www.genecards.org/cgi-bin/carddisp.pl?gene=RAB3GAP2">https://www.genecards.org/cgi-bin/carddisp.pl?gene=RAB3GAP2</a>           |

|               |                                                                                |                   |    |                 |          |                                                                                                                                         |
|---------------|--------------------------------------------------------------------------------|-------------------|----|-----------------|----------|-----------------------------------------------------------------------------------------------------------------------------------------|
| LRPAP1        | LDL Receptor<br>Related Protein<br>Associated<br>Protein 1                     | Protein<br>Coding | 44 | GC04M003<br>508 | 7.738897 | <a href="https://www.genecards.org/cgi-bin/carddisp.pl?gene=LRPAP1">https://www.genecards.org/cgi-bin/carddisp.pl?gene=LRPAP1</a>       |
| PPP2R1B       | Protein<br>Phosphatase 2<br>Scaffold<br>Subunit Abeta                          | Protein<br>Coding | 47 | GC11M111<br>695 | 7.738574 | <a href="https://www.genecards.org/cgi-bin/carddisp.pl?gene=PPP2R1B">https://www.genecards.org/cgi-bin/carddisp.pl?gene=PPP2R1B</a>     |
| E2F2          | E2F<br>Transcription<br>Factor 2                                               | Protein<br>Coding | 43 | GC01M023<br>541 | 7.736928 | <a href="https://www.genecards.org/cgi-bin/carddisp.pl?gene=E2F2">https://www.genecards.org/cgi-bin/carddisp.pl?gene=E2F2</a>           |
| NRIP1         | Nuclear<br>Receptor<br>Interacting<br>Protein 1                                | Protein<br>Coding | 44 | GC21M014<br>961 | 7.728158 | <a href="https://www.genecards.org/cgi-bin/carddisp.pl?gene=NRIP1">https://www.genecards.org/cgi-bin/carddisp.pl?gene=NRIP1</a>         |
| COL4A6        | Collagen Type<br>IV Alpha 6<br>Chain                                           | Protein<br>Coding | 45 | GC0XM108<br>155 | 7.722342 | <a href="https://www.genecards.org/cgi-bin/carddisp.pl?gene=COL4A6">https://www.genecards.org/cgi-bin/carddisp.pl?gene=COL4A6</a>       |
| DGCR8         | DGCR8<br>Microprocessor<br>Complex<br>Subunit                                  | Protein<br>Coding | 42 | GC22P0200<br>80 | 7.721457 | <a href="https://www.genecards.org/cgi-bin/carddisp.pl?gene=DGCR8">https://www.genecards.org/cgi-bin/carddisp.pl?gene=DGCR8</a>         |
| CD1C          | CD1c Molecule                                                                  | Protein<br>Coding | 41 | GC01P1582<br>89 | 7.720401 | <a href="https://www.genecards.org/cgi-bin/carddisp.pl?gene=CD1C">https://www.genecards.org/cgi-bin/carddisp.pl?gene=CD1C</a>           |
| ACTL6A        | Actin Like 6A                                                                  | Protein<br>Coding | 42 | GC03P1795<br>62 | 7.718887 | <a href="https://www.genecards.org/cgi-bin/carddisp.pl?gene=ACTL6A">https://www.genecards.org/cgi-bin/carddisp.pl?gene=ACTL6A</a>       |
| AFAP1-<br>AS1 | AFAP1<br>Antisense RNA<br>1                                                    | RNA<br>Gene       | 16 | GC04P0077<br>56 | 7.713319 | <a href="https://www.genecards.org/cgi-bin/carddisp.pl?gene=AFAP1-AS1">https://www.genecards.org/cgi-bin/carddisp.pl?gene=AFAP1-AS1</a> |
| ACAD10        | Acyl-CoA<br>Dehydrogenase<br>Family Member<br>10                               | Protein<br>Coding | 39 | GC12P1116<br>86 | 7.707722 | <a href="https://www.genecards.org/cgi-bin/carddisp.pl?gene=ACAD10">https://www.genecards.org/cgi-bin/carddisp.pl?gene=ACAD10</a>       |
| AMFR          | Autocrine<br>Motility Factor<br>Receptor                                       | Protein<br>Coding | 44 | GC16M056<br>361 | 7.706252 | <a href="https://www.genecards.org/cgi-bin/carddisp.pl?gene=AMFR">https://www.genecards.org/cgi-bin/carddisp.pl?gene=AMFR</a>           |
| KCNA5         | Potassium<br>Voltage-Gated<br>Channel<br>Subfamily A<br>Member 5               | Protein<br>Coding | 46 | GC12P0050<br>43 | 7.70451  | <a href="https://www.genecards.org/cgi-bin/carddisp.pl?gene=KCNA5">https://www.genecards.org/cgi-bin/carddisp.pl?gene=KCNA5</a>         |
| OBSCN         | Obscurin,<br>Cytoskeletal<br>Calmodulin<br>And Titin-<br>Interacting<br>RhoGEF | Protein<br>Coding | 40 | GC01P2282<br>08 | 7.704167 | <a href="https://www.genecards.org/cgi-bin/carddisp.pl?gene=OBSCN">https://www.genecards.org/cgi-bin/carddisp.pl?gene=OBSCN</a>         |
| NUMA1         | Nuclear Mitotic<br>Apparatus<br>Protein 1                                      | Protein<br>Coding | 44 | GC11M072<br>002 | 7.703823 | <a href="https://www.genecards.org/cgi-bin/carddisp.pl?gene=NUMA1">https://www.genecards.org/cgi-bin/carddisp.pl?gene=NUMA1</a>         |
| PUF60         | Poly(U) Binding<br>Splicing Factor<br>60                                       | Protein<br>Coding | 43 | GC08M143<br>816 | 7.69935  | <a href="https://www.genecards.org/cgi-bin/carddisp.pl?gene=PUF60">https://www.genecards.org/cgi-bin/carddisp.pl?gene=PUF60</a>         |
| PKNOX2        | PBX/Knotted 1<br>Homeobox 2                                                    | Protein<br>Coding | 37 | GC11P1251<br>64 | 7.691162 | <a href="https://www.genecards.org/cgi-bin/carddisp.pl?gene=PKNOX2">https://www.genecards.org/cgi-bin/carddisp.pl?gene=PKNOX2</a>       |

|           |                                                    |                |    |             |          |                                                                                                                                         |
|-----------|----------------------------------------------------|----------------|----|-------------|----------|-----------------------------------------------------------------------------------------------------------------------------------------|
| CDIN1     | CDAN1 Interacting Nuclease 1                       | Protein Coding | 30 | GC15P036580 | 7.689857 | <a href="https://www.genecards.org/cgi-bin/carddisp.pl?gene=CDIN1">https://www.genecards.org/cgi-bin/carddisp.pl?gene=CDIN1</a>         |
| SAMM50    | SAMM50 Sorting And Assembly Machinery Component    | Protein Coding | 38 | GC22P043955 | 7.688614 | <a href="https://www.genecards.org/cgi-bin/carddisp.pl?gene=SAMM50">https://www.genecards.org/cgi-bin/carddisp.pl?gene=SAMM50</a>       |
| EGLN1     | Egl-9 Family Hypoxia Inducible Factor 1            | Protein Coding | 50 | GC01M231363 | 7.683287 | <a href="https://www.genecards.org/cgi-bin/carddisp.pl?gene=EGLN1">https://www.genecards.org/cgi-bin/carddisp.pl?gene=EGLN1</a>         |
| NSD2      | Nuclear Receptor Binding SET Domain Protein 2      | Protein Coding | 36 | GC04P001872 | 7.682654 | <a href="https://www.genecards.org/cgi-bin/carddisp.pl?gene=NSD2">https://www.genecards.org/cgi-bin/carddisp.pl?gene=NSD2</a>           |
| ITGAV     | Integrin Subunit Alpha V                           | Protein Coding | 47 | GC02P186589 | 7.682635 | <a href="https://www.genecards.org/cgi-bin/carddisp.pl?gene=ITGAV">https://www.genecards.org/cgi-bin/carddisp.pl?gene=ITGAV</a>         |
| PRKD3     | Protein Kinase D3                                  | Protein Coding | 46 | GC02M037251 | 7.682086 | <a href="https://www.genecards.org/cgi-bin/carddisp.pl?gene=PRKD3">https://www.genecards.org/cgi-bin/carddisp.pl?gene=PRKD3</a>         |
| MIR615    | MicroRNA 615                                       | RNA Gene       | 20 | GC12P054033 | 7.675932 | <a href="https://www.genecards.org/cgi-bin/carddisp.pl?gene=MIR615">https://www.genecards.org/cgi-bin/carddisp.pl?gene=MIR615</a>       |
| MAPKAPK2  | MAPK Activated Protein Kinase 2                    | Protein Coding | 49 | GC01P206684 | 7.672384 | <a href="https://www.genecards.org/cgi-bin/carddisp.pl?gene=MAPKAPK2">https://www.genecards.org/cgi-bin/carddisp.pl?gene=MAPKAPK2</a>   |
| HYAL1     | Hyaluronidase 1                                    | Protein Coding | 47 | GC03M050299 | 7.66921  | <a href="https://www.genecards.org/cgi-bin/carddisp.pl?gene=HYAL1">https://www.genecards.org/cgi-bin/carddisp.pl?gene=HYAL1</a>         |
| SPRY4-IT1 | SPRY4 Intronic Transcript 1                        | RNA Gene       | 15 | GC05M142318 | 7.666531 | <a href="https://www.genecards.org/cgi-bin/carddisp.pl?gene=SPRY4-IT1">https://www.genecards.org/cgi-bin/carddisp.pl?gene=SPRY4-IT1</a> |
| PFAS      | Phosphoribosyl formylglycinamide Synthase          | Protein Coding | 44 | GC17P008247 | 7.664503 | <a href="https://www.genecards.org/cgi-bin/carddisp.pl?gene=PFAS">https://www.genecards.org/cgi-bin/carddisp.pl?gene=PFAS</a>           |
| ST3GAL3   | ST3 Beta-Galactoside Alpha-2,3-Sialyltransferase 3 | Protein Coding | 47 | GC01P043705 | 7.660644 | <a href="https://www.genecards.org/cgi-bin/carddisp.pl?gene=ST3GAL3">https://www.genecards.org/cgi-bin/carddisp.pl?gene=ST3GAL3</a>     |
| TSHB      | Thyroid Stimulating Hormone Subunit Beta           | Protein Coding | 43 | GC01P115029 | 7.649669 | <a href="https://www.genecards.org/cgi-bin/carddisp.pl?gene=TSHB">https://www.genecards.org/cgi-bin/carddisp.pl?gene=TSHB</a>           |
| MMP11     | Matrix Metalloproteinase 11                        | Protein Coding | 46 | GC22P023768 | 7.644756 | <a href="https://www.genecards.org/cgi-bin/carddisp.pl?gene=MMP11">https://www.genecards.org/cgi-bin/carddisp.pl?gene=MMP11</a>         |
| DLG1      | Discs Large MAGUK Scaffold Protein 1               | Protein Coding | 44 | GC03M197042 | 7.644752 | <a href="https://www.genecards.org/cgi-bin/carddisp.pl?gene=DLG1">https://www.genecards.org/cgi-bin/carddisp.pl?gene=DLG1</a>           |
| TPX2      | TPX2 Microtubule Nucleation Factor                 | Protein Coding | 42 | GC20P031739 | 7.640526 | <a href="https://www.genecards.org/cgi-bin/carddisp.pl?gene=TPX2">https://www.genecards.org/cgi-bin/carddisp.pl?gene=TPX2</a>           |

|         |                                                                                  |                |    |             |          |                                                                                                                                     |
|---------|----------------------------------------------------------------------------------|----------------|----|-------------|----------|-------------------------------------------------------------------------------------------------------------------------------------|
| CAD     | Carbamoyl-Phosphate Synthetase 2, Aspartate Transcarbamylase, And Dihydroorotase | Protein Coding | 51 | GC02P027217 | 7.636114 | <a href="https://www.genecards.org/cgi-bin/carddisp.pl?gene=CAD">https://www.genecards.org/cgi-bin/carddisp.pl?gene=CAD</a>         |
| BCAR1   | BCAR1 Scaffold Protein, Cas Family Member                                        | Protein Coding | 45 | GC16M075228 | 7.63121  | <a href="https://www.genecards.org/cgi-bin/carddisp.pl?gene=BCAR1">https://www.genecards.org/cgi-bin/carddisp.pl?gene=BCAR1</a>     |
| FHL2    | Four And A Half LIM Domains 2                                                    | Protein Coding | 47 | GC02M105357 | 7.629701 | <a href="https://www.genecards.org/cgi-bin/carddisp.pl?gene=FHL2">https://www.genecards.org/cgi-bin/carddisp.pl?gene=FHL2</a>       |
| TLL1    | Tolloid Like 1                                                                   | Protein Coding | 44 | GC04P165873 | 7.624031 | <a href="https://www.genecards.org/cgi-bin/carddisp.pl?gene=TLL1">https://www.genecards.org/cgi-bin/carddisp.pl?gene=TLL1</a>       |
| RBFOX1  | RNA Binding Fox-1 Homolog 1                                                      | Protein Coding | 38 | GC16P005688 | 7.623807 | <a href="https://www.genecards.org/cgi-bin/carddisp.pl?gene=RBFOX1">https://www.genecards.org/cgi-bin/carddisp.pl?gene=RBFOX1</a>   |
| RCAN1   | Regulator Of Calcineurin 1                                                       | Protein Coding | 44 | GC21M034513 | 7.623222 | <a href="https://www.genecards.org/cgi-bin/carddisp.pl?gene=RCAN1">https://www.genecards.org/cgi-bin/carddisp.pl?gene=RCAN1</a>     |
| SNTA1   | Syntrophin Alpha 1                                                               | Protein Coding | 45 | GC20M033407 | 7.621838 | <a href="https://www.genecards.org/cgi-bin/carddisp.pl?gene=SNTA1">https://www.genecards.org/cgi-bin/carddisp.pl?gene=SNTA1</a>     |
| RPLP0   | Ribosomal Protein Lateral Stalk Subunit P0                                       | Protein Coding | 42 | GC12M120196 | 7.61553  | <a href="https://www.genecards.org/cgi-bin/carddisp.pl?gene=RPLP0">https://www.genecards.org/cgi-bin/carddisp.pl?gene=RPLP0</a>     |
| ALDH1L1 | Aldehyde Dehydrogenase 1 Family Member L1                                        | Protein Coding | 41 | GC03M126103 | 7.611825 | <a href="https://www.genecards.org/cgi-bin/carddisp.pl?gene=ALDH1L1">https://www.genecards.org/cgi-bin/carddisp.pl?gene=ALDH1L1</a> |
| MFN1    | Mitofusin 1                                                                      | Protein Coding | 43 | GC03P179347 | 7.609973 | <a href="https://www.genecards.org/cgi-bin/carddisp.pl?gene=MFN1">https://www.genecards.org/cgi-bin/carddisp.pl?gene=MFN1</a>       |
| S100A7  | S100 Calcium Binding Protein A7                                                  | Protein Coding | 41 | GC01M153457 | 7.608862 | <a href="https://www.genecards.org/cgi-bin/carddisp.pl?gene=S100A7">https://www.genecards.org/cgi-bin/carddisp.pl?gene=S100A7</a>   |
| TMEM38B | Transmembrane Protein 38B                                                        | Protein Coding | 43 | GC09P105694 | 7.603172 | <a href="https://www.genecards.org/cgi-bin/carddisp.pl?gene=TMEM38B">https://www.genecards.org/cgi-bin/carddisp.pl?gene=TMEM38B</a> |
| MIR26A2 | MicroRNA 26a-2                                                                   | RNA Gene       | 20 | GC12M057824 | 7.601744 | <a href="https://www.genecards.org/cgi-bin/carddisp.pl?gene=MIR26A2">https://www.genecards.org/cgi-bin/carddisp.pl?gene=MIR26A2</a> |
| CARS1   | CysteinyI-TRNA Synthetase 1                                                      | Protein Coding | 34 | GC11M003000 | 7.596472 | <a href="https://www.genecards.org/cgi-bin/carddisp.pl?gene=CARS1">https://www.genecards.org/cgi-bin/carddisp.pl?gene=CARS1</a>     |
| GSTM2   | Glutathione S-Transferase Mu 2                                                   | Protein Coding | 42 | GC01P109668 | 7.592142 | <a href="https://www.genecards.org/cgi-bin/carddisp.pl?gene=GSTM2">https://www.genecards.org/cgi-bin/carddisp.pl?gene=GSTM2</a>     |
| RDH11   | Retinol Dehydrogenase 11                                                         | Protein Coding | 45 | GC14M067676 | 7.589113 | <a href="https://www.genecards.org/cgi-bin/carddisp.pl?gene=RDH11">https://www.genecards.org/cgi-bin/carddisp.pl?gene=RDH11</a>     |
| MEIS1   | Meis Homeobox 1                                                                  | Protein Coding | 43 | GC02P066433 | 7.587683 | <a href="https://www.genecards.org/cgi-bin/carddisp.pl?gene=MEIS1">https://www.genecards.org/cgi-bin/carddisp.pl?gene=MEIS1</a>     |
| PSMD9   | Proteasome 26S Subunit, Non-ATPase 9                                             | Protein Coding | 44 | GC12P123591 | 7.585121 | <a href="https://www.genecards.org/cgi-bin/carddisp.pl?gene=PSMD9">https://www.genecards.org/cgi-bin/carddisp.pl?gene=PSMD9</a>     |

|         |                                                                  |                |    |             |          |                                                                                                                                     |
|---------|------------------------------------------------------------------|----------------|----|-------------|----------|-------------------------------------------------------------------------------------------------------------------------------------|
| CPN1    | Carboxypeptidase N Subunit 1                                     | Protein Coding | 44 | GC10M100042 | 7.582891 | <a href="https://www.genecards.org/cgi-bin/carddisp.pl?gene=CPN1">https://www.genecards.org/cgi-bin/carddisp.pl?gene=CPN1</a>       |
| SPART   | Spartin                                                          | Protein Coding | 31 | GC13M036302 | 7.577155 | <a href="https://www.genecards.org/cgi-bin/carddisp.pl?gene=SPART">https://www.genecards.org/cgi-bin/carddisp.pl?gene=SPART</a>     |
| CES5A   | Carboxylesterase 5A                                              | Protein Coding | 33 | GC16M055881 | 7.57197  | <a href="https://www.genecards.org/cgi-bin/carddisp.pl?gene=CES5A">https://www.genecards.org/cgi-bin/carddisp.pl?gene=CES5A</a>     |
| FCGRT   | Fc Fragment Of IgG Receptor And Transporter                      | Protein Coding | 40 | GC19P049506 | 7.5684   | <a href="https://www.genecards.org/cgi-bin/carddisp.pl?gene=FCGRT">https://www.genecards.org/cgi-bin/carddisp.pl?gene=FCGRT</a>     |
| PSAT1   | Phosphoserine Aminotransferase 1                                 | Protein Coding | 48 | GC09P078297 | 7.566948 | <a href="https://www.genecards.org/cgi-bin/carddisp.pl?gene=PSAT1">https://www.genecards.org/cgi-bin/carddisp.pl?gene=PSAT1</a>     |
| LTBP1   | Latent Transforming Growth Factor Beta Binding Protein 1         | Protein Coding | 43 | GC02P032949 | 7.566686 | <a href="https://www.genecards.org/cgi-bin/carddisp.pl?gene=LTBP1">https://www.genecards.org/cgi-bin/carddisp.pl?gene=LTBP1</a>     |
| GPLD1   | Glycosylphosphatidylinositol Specific Phospholipase D1           | Protein Coding | 43 | GC06M024438 | 7.561166 | <a href="https://www.genecards.org/cgi-bin/carddisp.pl?gene=GPLD1">https://www.genecards.org/cgi-bin/carddisp.pl?gene=GPLD1</a>     |
| RAPGEF3 | Rap Guanine Nucleotide Exchange Factor 3                         | Protein Coding | 45 | GC12M047736 | 7.556888 | <a href="https://www.genecards.org/cgi-bin/carddisp.pl?gene=RAPGEF3">https://www.genecards.org/cgi-bin/carddisp.pl?gene=RAPGEF3</a> |
| PUS10   | Pseudouridine Synthase 10                                        | Protein Coding | 35 | GC02M060940 | 7.556578 | <a href="https://www.genecards.org/cgi-bin/carddisp.pl?gene=PUS10">https://www.genecards.org/cgi-bin/carddisp.pl?gene=PUS10</a>     |
| CDH11   | Cadherin 11                                                      | Protein Coding | 48 | GC16M064943 | 7.553524 | <a href="https://www.genecards.org/cgi-bin/carddisp.pl?gene=CDH11">https://www.genecards.org/cgi-bin/carddisp.pl?gene=CDH11</a>     |
| CD2     | CD2 Molecule                                                     | Protein Coding | 44 | GC01P116754 | 7.553261 | <a href="https://www.genecards.org/cgi-bin/carddisp.pl?gene=CD2">https://www.genecards.org/cgi-bin/carddisp.pl?gene=CD2</a>         |
| PTPN6   | Protein Tyrosine Phosphatase Non-Receptor Type 6                 | Protein Coding | 50 | GC12P011869 | 7.551253 | <a href="https://www.genecards.org/cgi-bin/carddisp.pl?gene=PTPN6">https://www.genecards.org/cgi-bin/carddisp.pl?gene=PTPN6</a>     |
| PSMA3   | Proteasome 20S Subunit Alpha 3                                   | Protein Coding | 45 | GC14P058244 | 7.548352 | <a href="https://www.genecards.org/cgi-bin/carddisp.pl?gene=PSMA3">https://www.genecards.org/cgi-bin/carddisp.pl?gene=PSMA3</a>     |
| CTBP2   | C-Terminal Binding Protein 2                                     | Protein Coding | 45 | GC10M124984 | 7.545674 | <a href="https://www.genecards.org/cgi-bin/carddisp.pl?gene=CTBP2">https://www.genecards.org/cgi-bin/carddisp.pl?gene=CTBP2</a>     |
| PTPRG   | Protein Tyrosine Phosphatase Receptor Type G                     | Protein Coding | 43 | GC03P061561 | 7.5432   | <a href="https://www.genecards.org/cgi-bin/carddisp.pl?gene=PTPRG">https://www.genecards.org/cgi-bin/carddisp.pl?gene=PTPRG</a>     |
| ESCO2   | Establishment Of Sister Chromatid Cohesion N-Acetyltransferase 2 | Protein Coding | 38 | GC08P027771 | 7.536304 | <a href="https://www.genecards.org/cgi-bin/carddisp.pl?gene=ESCO2">https://www.genecards.org/cgi-bin/carddisp.pl?gene=ESCO2</a>     |

|          |                                                         |                |    |             |          |                                                                                                                                       |
|----------|---------------------------------------------------------|----------------|----|-------------|----------|---------------------------------------------------------------------------------------------------------------------------------------|
| RNPC3    | RNA Binding Region (RNP1, RRM) Containing 3             | Protein Coding | 36 | GC01P103525 | 7.536044 | <a href="https://www.genecards.org/cgi-bin/carddisp.pl?gene=RNPC3">https://www.genecards.org/cgi-bin/carddisp.pl?gene=RNPC3</a>       |
| CBR4     | Carbonyl Reductase 4 Mono-ADP                           | Protein Coding | 39 | GC04M168864 | 7.528988 | <a href="https://www.genecards.org/cgi-bin/carddisp.pl?gene=CBR4">https://www.genecards.org/cgi-bin/carddisp.pl?gene=CBR4</a>         |
| MACROD2  | Ribosylhydrolase 2                                      | Protein Coding | 36 | GC20P013925 | 7.527433 | <a href="https://www.genecards.org/cgi-bin/carddisp.pl?gene=MACROD2">https://www.genecards.org/cgi-bin/carddisp.pl?gene=MACROD2</a>   |
| C12orf43 | Chromosome 12 Open Reading Frame 43                     | Protein Coding | 33 | GC12M121000 | 7.525036 | <a href="https://www.genecards.org/cgi-bin/carddisp.pl?gene=C12orf43">https://www.genecards.org/cgi-bin/carddisp.pl?gene=C12orf43</a> |
| IFNL4    | Interferon Lambda 4 (Gene/Pseudogene)                   | Protein Coding | 19 | GC19M039246 | 7.520307 | <a href="https://www.genecards.org/cgi-bin/carddisp.pl?gene=IFNL4">https://www.genecards.org/cgi-bin/carddisp.pl?gene=IFNL4</a>       |
| ATOH7    | Atonal BHLH Transcription Factor 7                      | Protein Coding | 41 | GC10M068230 | 7.520124 | <a href="https://www.genecards.org/cgi-bin/carddisp.pl?gene=ATOH7">https://www.genecards.org/cgi-bin/carddisp.pl?gene=ATOH7</a>       |
| FREM1    | FRAS1 Related Extracellular Matrix 1                    | Protein Coding | 40 | GC09M014734 | 7.518405 | <a href="https://www.genecards.org/cgi-bin/carddisp.pl?gene=FREM1">https://www.genecards.org/cgi-bin/carddisp.pl?gene=FREM1</a>       |
| PENK     | Proenkephalin                                           | Protein Coding | 38 | GC08M056436 | 7.517125 | <a href="https://www.genecards.org/cgi-bin/carddisp.pl?gene=PENK">https://www.genecards.org/cgi-bin/carddisp.pl?gene=PENK</a>         |
| ATG14    | Autophagy Related 14                                    | Protein Coding | 37 | GC14M055366 | 7.515988 | <a href="https://www.genecards.org/cgi-bin/carddisp.pl?gene=ATG14">https://www.genecards.org/cgi-bin/carddisp.pl?gene=ATG14</a>       |
| PSMD2    | Proteasome 26S Subunit Ubiquitin Receptor, Non-ATPase 2 | Protein Coding | 44 | GC03P184298 | 7.508441 | <a href="https://www.genecards.org/cgi-bin/carddisp.pl?gene=PSMD2">https://www.genecards.org/cgi-bin/carddisp.pl?gene=PSMD2</a>       |
| HMOX2    | Heme Oxygenase 2                                        | Protein Coding | 48 | GC16P004474 | 7.506993 | <a href="https://www.genecards.org/cgi-bin/carddisp.pl?gene=HMOX2">https://www.genecards.org/cgi-bin/carddisp.pl?gene=HMOX2</a>       |
| ING1     | Inhibitor Of Growth Family Member 1                     | Protein Coding | 44 | GC13P110712 | 7.504208 | <a href="https://www.genecards.org/cgi-bin/carddisp.pl?gene=ING1">https://www.genecards.org/cgi-bin/carddisp.pl?gene=ING1</a>         |
| PRKCH    | Protein Kinase C Eta                                    | Protein Coding | 51 | GC14P061187 | 7.501637 | <a href="https://www.genecards.org/cgi-bin/carddisp.pl?gene=PRKCH">https://www.genecards.org/cgi-bin/carddisp.pl?gene=PRKCH</a>       |
| NISCH    | Nischarin                                               | Protein Coding | 41 | GC03P052455 | 7.498565 | <a href="https://www.genecards.org/cgi-bin/carddisp.pl?gene=NISCH">https://www.genecards.org/cgi-bin/carddisp.pl?gene=NISCH</a>       |
| HSPE1    | Heat Shock Protein Family E (Hsp10) Member 1            | Protein Coding | 41 | GC02P197501 | 7.496153 | <a href="https://www.genecards.org/cgi-bin/carddisp.pl?gene=HSPE1">https://www.genecards.org/cgi-bin/carddisp.pl?gene=HSPE1</a>       |
| NUP98    | Nucleoporin 98 And 96 Precursor                         | Protein Coding | 44 | GC11M003671 | 7.492716 | <a href="https://www.genecards.org/cgi-bin/carddisp.pl?gene=NUP98">https://www.genecards.org/cgi-bin/carddisp.pl?gene=NUP98</a>       |
| SRSF1    | Serine And Arginine Rich Splicing Factor 1              | Protein Coding | 43 | GC17M058000 | 7.491862 | <a href="https://www.genecards.org/cgi-bin/carddisp.pl?gene=SRSF1">https://www.genecards.org/cgi-bin/carddisp.pl?gene=SRSF1</a>       |
| TMSB4X   | Thymosin Beta 4 X-Linked                                | Protein Coding | 40 | GC0XP012975 | 7.489902 | <a href="https://www.genecards.org/cgi-bin/carddisp.pl?gene=TMSB4X">https://www.genecards.org/cgi-bin/carddisp.pl?gene=TMSB4X</a>     |
| MST1R    | Macrophage Stimulating 1 Receptor                       | Protein Coding | 49 | GC03M050077 | 7.487237 | <a href="https://www.genecards.org/cgi-bin/carddisp.pl?gene=MST1R">https://www.genecards.org/cgi-bin/carddisp.pl?gene=MST1R</a>       |

|          |                                                                    |                |    |             |          |                                                                                                                                       |
|----------|--------------------------------------------------------------------|----------------|----|-------------|----------|---------------------------------------------------------------------------------------------------------------------------------------|
| ATAD3A   | ATPase Family AAA Domain Containing 3A                             | Protein Coding | 40 | GC01P002047 | 7.482653 | <a href="https://www.genecards.org/cgi-bin/carddisp.pl?gene=ATAD3A">https://www.genecards.org/cgi-bin/carddisp.pl?gene=ATAD3A</a>     |
| GADD45A  | Growth Arrest And DNA Damage Inducible Alpha                       | Protein Coding | 45 | GC01P067685 | 7.478284 | <a href="https://www.genecards.org/cgi-bin/carddisp.pl?gene=GADD45A">https://www.genecards.org/cgi-bin/carddisp.pl?gene=GADD45A</a>   |
| ESRRG    | Estrogen Related Receptor Gamma                                    | Protein Coding | 46 | GC01M216503 | 7.477733 | <a href="https://www.genecards.org/cgi-bin/carddisp.pl?gene=ESRRG">https://www.genecards.org/cgi-bin/carddisp.pl?gene=ESRRG</a>       |
| MIAT     | Myocardial Infarction Associated Transcript                        | RNA Gene       | 23 | GC22P026646 | 7.475718 | <a href="https://www.genecards.org/cgi-bin/carddisp.pl?gene=MIAT">https://www.genecards.org/cgi-bin/carddisp.pl?gene=MIAT</a>         |
| IGHG1    | Immunoglobulin Heavy Constant Gamma 1 (G1m Marker)                 | Protein Coding | 33 | GC14M105736 | 7.475567 | <a href="https://www.genecards.org/cgi-bin/carddisp.pl?gene=IGHG1">https://www.genecards.org/cgi-bin/carddisp.pl?gene=IGHG1</a>       |
| H2BC21   | H2B Clustered Histone 21                                           | Protein Coding | 33 | GC01M150135 | 7.474762 | <a href="https://www.genecards.org/cgi-bin/carddisp.pl?gene=H2BC21">https://www.genecards.org/cgi-bin/carddisp.pl?gene=H2BC21</a>     |
| H4C1     | H4 Clustered Histone 1                                             | Protein Coding | 33 | GC06P054981 | 7.473227 | <a href="https://www.genecards.org/cgi-bin/carddisp.pl?gene=H4C1">https://www.genecards.org/cgi-bin/carddisp.pl?gene=H4C1</a>         |
| CYTOR    | Cytoskeleton Regulator RNA                                         | RNA Gene       | 18 | GC02P087600 | 7.469452 | <a href="https://www.genecards.org/cgi-bin/carddisp.pl?gene=CYTOR">https://www.genecards.org/cgi-bin/carddisp.pl?gene=CYTOR</a>       |
| LINC-ROR | Long Intergenic Non-Protein Coding RNA, Regulator Of Reprogramming | RNA Gene       | 17 | GC18M057054 | 7.464442 | <a href="https://www.genecards.org/cgi-bin/carddisp.pl?gene=LINC-ROR">https://www.genecards.org/cgi-bin/carddisp.pl?gene=LINC-ROR</a> |
| TMEM176A | Transmembrane Protein 176A                                         | Protein Coding | 34 | GC07P150800 | 7.46336  | <a href="https://www.genecards.org/cgi-bin/carddisp.pl?gene=TMEM176A">https://www.genecards.org/cgi-bin/carddisp.pl?gene=TMEM176A</a> |
| KCNK9    | Potassium Two Pore Domain Channel Subfamily K Member 9             | Protein Coding | 47 | GC08M139585 | 7.462872 | <a href="https://www.genecards.org/cgi-bin/carddisp.pl?gene=KCNK9">https://www.genecards.org/cgi-bin/carddisp.pl?gene=KCNK9</a>       |
| SIRT4    | Sirtuin 4                                                          | Protein Coding | 40 | GC12P120291 | 7.461133 | <a href="https://www.genecards.org/cgi-bin/carddisp.pl?gene=SIRT4">https://www.genecards.org/cgi-bin/carddisp.pl?gene=SIRT4</a>       |
| TRIM25   | Tripartite Motif Containing 25                                     | Protein Coding | 44 | GC17M056836 | 7.456665 | <a href="https://www.genecards.org/cgi-bin/carddisp.pl?gene=TRIM25">https://www.genecards.org/cgi-bin/carddisp.pl?gene=TRIM25</a>     |
| FBLN1    | Fibulin 1                                                          | Protein Coding | 44 | GC22P045502 | 7.454296 | <a href="https://www.genecards.org/cgi-bin/carddisp.pl?gene=FBLN1">https://www.genecards.org/cgi-bin/carddisp.pl?gene=FBLN1</a>       |
| RAN      | RAN, Member RAS Oncogene Family                                    | Protein Coding | 45 | GC12P130871 | 7.447463 | <a href="https://www.genecards.org/cgi-bin/carddisp.pl?gene=RAN">https://www.genecards.org/cgi-bin/carddisp.pl?gene=RAN</a>           |
| H3-3A    | H3.3 Histone A                                                     | Protein Coding | 36 | GC01P226062 | 7.447256 | <a href="https://www.genecards.org/cgi-bin/carddisp.pl?gene=H3-3A">https://www.genecards.org/cgi-bin/carddisp.pl?gene=H3-3A</a>       |
| MIR9-3   | MicroRNA 9-3                                                       | RNA Gene       | 20 | GC15P089363 | 7.445541 | <a href="https://www.genecards.org/cgi-bin/carddisp.pl?gene=MIR9-3">https://www.genecards.org/cgi-bin/carddisp.pl?gene=MIR9-3</a>     |



|         |                                                                  |                |    |             |          |                                                                                                                                     |
|---------|------------------------------------------------------------------|----------------|----|-------------|----------|-------------------------------------------------------------------------------------------------------------------------------------|
| GAB2    | GRB2 Associated Binding Protein 2                                | Protein Coding | 44 | GC11M078215 | 7.444842 | <a href="https://www.genecards.org/cgi-bin/carddisp.pl?gene=GAB2">https://www.genecards.org/cgi-bin/carddisp.pl?gene=GAB2</a>       |
| URI1    | URI1 Prefoldin Like Chaperone                                    | Protein Coding | 38 | GC19P029923 | 7.441195 | <a href="https://www.genecards.org/cgi-bin/carddisp.pl?gene=URI1">https://www.genecards.org/cgi-bin/carddisp.pl?gene=URI1</a>       |
| CLDN10  | Claudin 10                                                       | Protein Coding | 43 | GC13P095433 | 7.441037 | <a href="https://www.genecards.org/cgi-bin/carddisp.pl?gene=CLDN10">https://www.genecards.org/cgi-bin/carddisp.pl?gene=CLDN10</a>   |
| CSMD1   | CUB And Sushi Multiple Domains 1                                 | Protein Coding | 38 | GC08M002953 | 7.439883 | <a href="https://www.genecards.org/cgi-bin/carddisp.pl?gene=CSMD1">https://www.genecards.org/cgi-bin/carddisp.pl?gene=CSMD1</a>     |
| AGMO    | Alkylglycerol Monooxygenase Piccolo                              | Protein Coding | 34 | GC07M015117 | 7.437379 | <a href="https://www.genecards.org/cgi-bin/carddisp.pl?gene=AGMO">https://www.genecards.org/cgi-bin/carddisp.pl?gene=AGMO</a>       |
| PCLO    | Presynaptic Cytomatrix Protein Voltage                           | Protein Coding | 41 | GC07M082754 | 7.435509 | <a href="https://www.genecards.org/cgi-bin/carddisp.pl?gene=PCLO">https://www.genecards.org/cgi-bin/carddisp.pl?gene=PCLO</a>       |
| VDAC2   | Dependent Anion Channel 2                                        | Protein Coding | 44 | GC10P075210 | 7.435448 | <a href="https://www.genecards.org/cgi-bin/carddisp.pl?gene=VDAC2">https://www.genecards.org/cgi-bin/carddisp.pl?gene=VDAC2</a>     |
| UQCC2   | Ubiquinol-Cytochrome C Reductase Complex Assembly Factor 2       | Protein Coding | 36 | GC06M033694 | 7.435006 | <a href="https://www.genecards.org/cgi-bin/carddisp.pl?gene=UQCC2">https://www.genecards.org/cgi-bin/carddisp.pl?gene=UQCC2</a>     |
| AADAC   | Arylacetamide Deacetylase ADAM                                   | Protein Coding | 42 | GC03P151813 | 7.429881 | <a href="https://www.genecards.org/cgi-bin/carddisp.pl?gene=AADAC">https://www.genecards.org/cgi-bin/carddisp.pl?gene=AADAC</a>     |
| ADAM12  | Metalloproteinase Domain 12                                      | Protein Coding | 45 | GC10M126012 | 7.425879 | <a href="https://www.genecards.org/cgi-bin/carddisp.pl?gene=ADAM12">https://www.genecards.org/cgi-bin/carddisp.pl?gene=ADAM12</a>   |
| ZNF469  | Zinc Finger Protein 469                                          | Protein Coding | 34 | GC16P088382 | 7.424431 | <a href="https://www.genecards.org/cgi-bin/carddisp.pl?gene=ZNF469">https://www.genecards.org/cgi-bin/carddisp.pl?gene=ZNF469</a>   |
| MAD1L1  | Mitotic Arrest Deficient 1 Like 1                                | Protein Coding | 47 | GC07M001815 | 7.42154  | <a href="https://www.genecards.org/cgi-bin/carddisp.pl?gene=MAD1L1">https://www.genecards.org/cgi-bin/carddisp.pl?gene=MAD1L1</a>   |
| ANXA7   | Annexin A7                                                       | Protein Coding | 43 | GC10M073375 | 7.41814  | <a href="https://www.genecards.org/cgi-bin/carddisp.pl?gene=ANXA7">https://www.genecards.org/cgi-bin/carddisp.pl?gene=ANXA7</a>     |
| BNIP3   | BCL2 Interacting Protein 3                                       | Protein Coding | 43 | GC10M131966 | 7.412077 | <a href="https://www.genecards.org/cgi-bin/carddisp.pl?gene=BNIP3">https://www.genecards.org/cgi-bin/carddisp.pl?gene=BNIP3</a>     |
| CPE     | Carboxypeptidase E WD Repeat                                     | Protein Coding | 45 | GC04P165361 | 7.411973 | <a href="https://www.genecards.org/cgi-bin/carddisp.pl?gene=CPE">https://www.genecards.org/cgi-bin/carddisp.pl?gene=CPE</a>         |
| WDFY3   | And FYVE Domain Containing 3                                     | Protein Coding | 41 | GC04M084669 | 7.402159 | <a href="https://www.genecards.org/cgi-bin/carddisp.pl?gene=WDFY3">https://www.genecards.org/cgi-bin/carddisp.pl?gene=WDFY3</a>     |
| MTHFD1L | Methylenetetrahydrofolate Dehydrogenase (NADP+ Dependent) 1 Like | Protein Coding | 43 | GC06P150865 | 7.399655 | <a href="https://www.genecards.org/cgi-bin/carddisp.pl?gene=MTHFD1L">https://www.genecards.org/cgi-bin/carddisp.pl?gene=MTHFD1L</a> |

|        |                                                     |                |    |             |          |                                                                                                                                   |
|--------|-----------------------------------------------------|----------------|----|-------------|----------|-----------------------------------------------------------------------------------------------------------------------------------|
| SOX17  | SRY-Box Transcription Factor 17                     | Protein Coding | 44 | GC08P054457 | 7.398008 | <a href="https://www.genecards.org/cgi-bin/carddisp.pl?gene=SOX17">https://www.genecards.org/cgi-bin/carddisp.pl?gene=SOX17</a>   |
| DANCR  | Differentiation Antagonizing Non-Protein Coding RNA | RNA Gene       | 21 | GC04P052712 | 7.393661 | <a href="https://www.genecards.org/cgi-bin/carddisp.pl?gene=DANCR">https://www.genecards.org/cgi-bin/carddisp.pl?gene=DANCR</a>   |
| AP1S3  | Adaptor Related Protein Complex 1 Subunit Sigma 3   | Protein Coding | 40 | GC02M223751 | 7.390699 | <a href="https://www.genecards.org/cgi-bin/carddisp.pl?gene=AP1S3">https://www.genecards.org/cgi-bin/carddisp.pl?gene=AP1S3</a>   |
| LTC4S  | Leukotriene C4 Synthase                             | Protein Coding | 43 | GC05P179793 | 7.390403 | <a href="https://www.genecards.org/cgi-bin/carddisp.pl?gene=LTC4S">https://www.genecards.org/cgi-bin/carddisp.pl?gene=LTC4S</a>   |
| MLANA  | Melan-A                                             | Protein Coding | 40 | GC09P005899 | 7.390331 | <a href="https://www.genecards.org/cgi-bin/carddisp.pl?gene=MLANA">https://www.genecards.org/cgi-bin/carddisp.pl?gene=MLANA</a>   |
| PDIA3  | Protein Disulfide Isomerase Family A Member 3       | Protein Coding | 46 | GC15P043746 | 7.389163 | <a href="https://www.genecards.org/cgi-bin/carddisp.pl?gene=PDIA3">https://www.genecards.org/cgi-bin/carddisp.pl?gene=PDIA3</a>   |
| ILK    | Integrin Linked Kinase                              | Protein Coding | 47 | GC11P006604 | 7.378003 | <a href="https://www.genecards.org/cgi-bin/carddisp.pl?gene=ILK">https://www.genecards.org/cgi-bin/carddisp.pl?gene=ILK</a>       |
| GAS6   | Growth Arrest Specific 6                            | Protein Coding | 44 | GC13M113820 | 7.37648  | <a href="https://www.genecards.org/cgi-bin/carddisp.pl?gene=GAS6">https://www.genecards.org/cgi-bin/carddisp.pl?gene=GAS6</a>     |
| IDI1   | Isopentenyl-Diphosphate Delta Isomerase 1           | Protein Coding | 44 | GC10M001039 | 7.375937 | <a href="https://www.genecards.org/cgi-bin/carddisp.pl?gene=IDI1">https://www.genecards.org/cgi-bin/carddisp.pl?gene=IDI1</a>     |
| TAGLN  | Transgelin                                          | Protein Coding | 44 | GC11P117199 | 7.375097 | <a href="https://www.genecards.org/cgi-bin/carddisp.pl?gene=TAGLN">https://www.genecards.org/cgi-bin/carddisp.pl?gene=TAGLN</a>   |
| MYO1B  | Myosin IB                                           | Protein Coding | 39 | GC02P191246 | 7.3727   | <a href="https://www.genecards.org/cgi-bin/carddisp.pl?gene=MYO1B">https://www.genecards.org/cgi-bin/carddisp.pl?gene=MYO1B</a>   |
| ICAM3  | Intercellular Adhesion Molecule 3                   | Protein Coding | 42 | GC19M010335 | 7.370205 | <a href="https://www.genecards.org/cgi-bin/carddisp.pl?gene=ICAM3">https://www.genecards.org/cgi-bin/carddisp.pl?gene=ICAM3</a>   |
| RPS15A | Ribosomal Protein S15a                              | Protein Coding | 43 | GC16M018781 | 7.369634 | <a href="https://www.genecards.org/cgi-bin/carddisp.pl?gene=RPS15A">https://www.genecards.org/cgi-bin/carddisp.pl?gene=RPS15A</a> |
| FAF1   | Fas Associated Factor 1                             | Protein Coding | 44 | GC01M050439 | 7.366925 | <a href="https://www.genecards.org/cgi-bin/carddisp.pl?gene=FAF1">https://www.genecards.org/cgi-bin/carddisp.pl?gene=FAF1</a>     |
| UBTF   | Upstream Binding Transcription Factor               | Protein Coding | 44 | GC17M044205 | 7.360384 | <a href="https://www.genecards.org/cgi-bin/carddisp.pl?gene=UBTF">https://www.genecards.org/cgi-bin/carddisp.pl?gene=UBTF</a>     |
| LGALS9 | Galectin 9                                          | Protein Coding | 40 | GC17P027629 | 7.359166 | <a href="https://www.genecards.org/cgi-bin/carddisp.pl?gene=LGALS9">https://www.genecards.org/cgi-bin/carddisp.pl?gene=LGALS9</a> |
| PROZ   | Protein Z, Vitamin K Dependent Plasma Glycoprotein  | Protein Coding | 40 | GC13P113158 | 7.358657 | <a href="https://www.genecards.org/cgi-bin/carddisp.pl?gene=PROZ">https://www.genecards.org/cgi-bin/carddisp.pl?gene=PROZ</a>     |
| RPL7   | Ribosomal Protein L7                                | Protein Coding | 43 | GC08M073290 | 7.352774 | <a href="https://www.genecards.org/cgi-bin/carddisp.pl?gene=RPL7">https://www.genecards.org/cgi-bin/carddisp.pl?gene=RPL7</a>     |
| ZDHHC2 | Zinc Finger DHHC-Type Palmitoyltransferase 2        | Protein Coding | 39 | GC08P017156 | 7.350923 | <a href="https://www.genecards.org/cgi-bin/carddisp.pl?gene=ZDHHC2">https://www.genecards.org/cgi-bin/carddisp.pl?gene=ZDHHC2</a> |

|          |                                                                    |                   |    |                 |          |                                                                                                                                       |
|----------|--------------------------------------------------------------------|-------------------|----|-----------------|----------|---------------------------------------------------------------------------------------------------------------------------------------|
| IQGAP1   | IQ Motif<br>Containing<br>GTPase<br>Activating<br>Protein 1        | Protein<br>Coding | 44 | GC15P0903<br>88 | 7.34699  | <a href="https://www.genecards.org/cgi-bin/carddisp.pl?gene=IQGAP1">https://www.genecards.org/cgi-bin/carddisp.pl?gene=IQGAP1</a>     |
| BIRC2    | Baculoviral IAP<br>Repeat<br>Containing 2                          | Protein<br>Coding | 46 | GC11P1023<br>47 | 7.346878 | <a href="https://www.genecards.org/cgi-bin/carddisp.pl?gene=BIRC2">https://www.genecards.org/cgi-bin/carddisp.pl?gene=BIRC2</a>       |
| SLC25A24 | Solute Carrier<br>Family 25<br>Member 24                           | Protein<br>Coding | 44 | GC01M108<br>134 | 7.345687 | <a href="https://www.genecards.org/cgi-bin/carddisp.pl?gene=SLC25A24">https://www.genecards.org/cgi-bin/carddisp.pl?gene=SLC25A24</a> |
| PMVK     | Phosphomevalonate<br>Kinase                                        | Protein<br>Coding | 45 | GC01M154<br>924 | 7.338291 | <a href="https://www.genecards.org/cgi-bin/carddisp.pl?gene=PMVK">https://www.genecards.org/cgi-bin/carddisp.pl?gene=PMVK</a>         |
| SVBP     | Small<br>Vasohibin<br>Binding Protein                              | Protein<br>Coding | 27 | GC01M042<br>808 | 7.330774 | <a href="https://www.genecards.org/cgi-bin/carddisp.pl?gene=SVBP">https://www.genecards.org/cgi-bin/carddisp.pl?gene=SVBP</a>         |
| CCL22    | C-C Motif<br>Chemokine<br>Ligand 22                                | Protein<br>Coding | 38 | GC16P0573<br>59 | 7.329659 | <a href="https://www.genecards.org/cgi-bin/carddisp.pl?gene=CCL22">https://www.genecards.org/cgi-bin/carddisp.pl?gene=CCL22</a>       |
| SAT1     | Spermidine/Sp<br>ermine N1-<br>Acetyltransferase 1                 | Protein<br>Coding | 46 | GC0XP0237<br>84 | 7.311718 | <a href="https://www.genecards.org/cgi-bin/carddisp.pl?gene=SAT1">https://www.genecards.org/cgi-bin/carddisp.pl?gene=SAT1</a>         |
| CCL27    | C-C Motif<br>Chemokine<br>Ligand 27                                | Protein<br>Coding | 38 | GC09M034<br>662 | 7.310849 | <a href="https://www.genecards.org/cgi-bin/carddisp.pl?gene=CCL27">https://www.genecards.org/cgi-bin/carddisp.pl?gene=CCL27</a>       |
| RIPK2    | Receptor<br>Interacting<br>Serine/Threonine<br>Kinase 2            | Protein<br>Coding | 47 | GC08P0897<br>58 | 7.309886 | <a href="https://www.genecards.org/cgi-bin/carddisp.pl?gene=RIPK2">https://www.genecards.org/cgi-bin/carddisp.pl?gene=RIPK2</a>       |
| NECTIN2  | Nectin Cell<br>Adhesion<br>Molecule 2                              | Protein<br>Coding | 37 | GC19P0448<br>49 | 7.304943 | <a href="https://www.genecards.org/cgi-bin/carddisp.pl?gene=NECTIN2">https://www.genecards.org/cgi-bin/carddisp.pl?gene=NECTIN2</a>   |
| ARF6     | ADP<br>Ribosylation<br>Factor 6                                    | Protein<br>Coding | 45 | GC14P0498<br>95 | 7.303465 | <a href="https://www.genecards.org/cgi-bin/carddisp.pl?gene=ARF6">https://www.genecards.org/cgi-bin/carddisp.pl?gene=ARF6</a>         |
| KCNK3    | Potassium Two<br>Pore Domain<br>Channel<br>Subfamily K<br>Member 3 | Protein<br>Coding | 50 | GC02P0266<br>92 | 7.295532 | <a href="https://www.genecards.org/cgi-bin/carddisp.pl?gene=KCNK3">https://www.genecards.org/cgi-bin/carddisp.pl?gene=KCNK3</a>       |
| ANO3     | Anoctamin 3                                                        | Protein<br>Coding | 39 | GC11P0261<br>88 | 7.295217 | <a href="https://www.genecards.org/cgi-bin/carddisp.pl?gene=ANO3">https://www.genecards.org/cgi-bin/carddisp.pl?gene=ANO3</a>         |
| AMBRA1   | Autophagy<br>And Beclin 1<br>Regulator 1                           | Protein<br>Coding | 39 | GC11M068<br>969 | 7.29107  | <a href="https://www.genecards.org/cgi-bin/carddisp.pl?gene=AMBRA1">https://www.genecards.org/cgi-bin/carddisp.pl?gene=AMBRA1</a>     |
| CEP85L   | Centrosomal<br>Protein 85 Like                                     | Protein<br>Coding | 35 | GC06M118<br>460 | 7.290624 | <a href="https://www.genecards.org/cgi-bin/carddisp.pl?gene=CEP85L">https://www.genecards.org/cgi-bin/carddisp.pl?gene=CEP85L</a>     |
| LPAR6    | Lysophosphatidic<br>Acid<br>Receptor 6                             | Protein<br>Coding | 46 | GC13M048<br>389 | 7.288377 | <a href="https://www.genecards.org/cgi-bin/carddisp.pl?gene=LPAR6">https://www.genecards.org/cgi-bin/carddisp.pl?gene=LPAR6</a>       |
| TNFSF13  | TNF<br>Superfamily<br>Member 13                                    | Protein<br>Coding | 45 | GC17P0075<br>58 | 7.284657 | <a href="https://www.genecards.org/cgi-bin/carddisp.pl?gene=TNFSF13">https://www.genecards.org/cgi-bin/carddisp.pl?gene=TNFSF13</a>   |
| CMA1     | Chymase 1                                                          | Protein<br>Coding | 44 | GC14M024<br>506 | 7.282912 | <a href="https://www.genecards.org/cgi-bin/carddisp.pl?gene=CMA1">https://www.genecards.org/cgi-bin/carddisp.pl?gene=CMA1</a>         |

|         |                                                                 |                |    |             |          |                                                                                                                                     |
|---------|-----------------------------------------------------------------|----------------|----|-------------|----------|-------------------------------------------------------------------------------------------------------------------------------------|
| CD5L    | CD5 Molecule Like                                               | Protein Coding | 39 | GC01M157800 | 7.271056 | <a href="https://www.genecards.org/cgi-bin/carddisp.pl?gene=CD5L">https://www.genecards.org/cgi-bin/carddisp.pl?gene=CD5L</a>       |
| PZP     | PZP Alpha-2-Macroglobulin Like                                  | Protein Coding | 40 | GC12M009148 | 7.263736 | <a href="https://www.genecards.org/cgi-bin/carddisp.pl?gene=PZP">https://www.genecards.org/cgi-bin/carddisp.pl?gene=PZP</a>         |
| PSMB5   | Proteasome 20S Subunit Beta 5                                   | Protein Coding | 45 | GC14M023016 | 7.252934 | <a href="https://www.genecards.org/cgi-bin/carddisp.pl?gene=PSMB5">https://www.genecards.org/cgi-bin/carddisp.pl?gene=PSMB5</a>     |
| CSNK1E  | Casein Kinase 1 Epsilon Receptor                                | Protein Coding | 48 | GC22M048647 | 7.252754 | <a href="https://www.genecards.org/cgi-bin/carddisp.pl?gene=CSNK1E">https://www.genecards.org/cgi-bin/carddisp.pl?gene=CSNK1E</a>   |
| RIPK3   | Interacting Serine/Threonine Kinase 3                           | Protein Coding | 43 | GC14M024336 | 7.244665 | <a href="https://www.genecards.org/cgi-bin/carddisp.pl?gene=RIPK3">https://www.genecards.org/cgi-bin/carddisp.pl?gene=RIPK3</a>     |
| FBL     | Fibrillarin                                                     | Protein Coding | 44 | GC19M039834 | 7.244516 | <a href="https://www.genecards.org/cgi-bin/carddisp.pl?gene=FBL">https://www.genecards.org/cgi-bin/carddisp.pl?gene=FBL</a>         |
| ZNF335  | Zinc Finger Protein 335 Ubiquitin Like                          | Protein Coding | 38 | GC20M045948 | 7.24309  | <a href="https://www.genecards.org/cgi-bin/carddisp.pl?gene=ZNF335">https://www.genecards.org/cgi-bin/carddisp.pl?gene=ZNF335</a>   |
| UBA5    | Modifier Activating Enzyme 5                                    | Protein Coding | 43 | GC03P132654 | 7.242118 | <a href="https://www.genecards.org/cgi-bin/carddisp.pl?gene=UBA5">https://www.genecards.org/cgi-bin/carddisp.pl?gene=UBA5</a>       |
| KLC1    | Kinesin Light Chain 1 SWI/SNF Related, Matrix Associated, Actin | Protein Coding | 42 | GC14P106043 | 7.239972 | <a href="https://www.genecards.org/cgi-bin/carddisp.pl?gene=KLC1">https://www.genecards.org/cgi-bin/carddisp.pl?gene=KLC1</a>       |
| SMARCD1 | Dependent Regulator Of Chromatin, Subfamily D, Member 1         | Protein Coding | 43 | GC12P050085 | 7.238363 | <a href="https://www.genecards.org/cgi-bin/carddisp.pl?gene=SMARCD1">https://www.genecards.org/cgi-bin/carddisp.pl?gene=SMARCD1</a> |
| CSTA    | Cystatin A                                                      | Protein Coding | 44 | GC03P122325 | 7.232214 | <a href="https://www.genecards.org/cgi-bin/carddisp.pl?gene=CSTA">https://www.genecards.org/cgi-bin/carddisp.pl?gene=CSTA</a>       |
| STT3A   | STT3 Oligosaccharyltransferase Complex Catalytic Subunit A      | Protein Coding | 45 | GC11P125592 | 7.230584 | <a href="https://www.genecards.org/cgi-bin/carddisp.pl?gene=STT3A">https://www.genecards.org/cgi-bin/carddisp.pl?gene=STT3A</a>     |
| DCLK1   | Doublecortin Like Kinase 1                                      | Protein Coding | 44 | GC13M035768 | 7.229346 | <a href="https://www.genecards.org/cgi-bin/carddisp.pl?gene=DCLK1">https://www.genecards.org/cgi-bin/carddisp.pl?gene=DCLK1</a>     |
| TRIM63  | Tripartite Motif Containing 63 Exocyst                          | Protein Coding | 41 | GC01M026062 | 7.22347  | <a href="https://www.genecards.org/cgi-bin/carddisp.pl?gene=TRIM63">https://www.genecards.org/cgi-bin/carddisp.pl?gene=TRIM63</a>   |
| EXOC3L2 | Complex Component 3 Like 2                                      | Protein Coding | 34 | GC19M045212 | 7.218055 | <a href="https://www.genecards.org/cgi-bin/carddisp.pl?gene=EXOC3L2">https://www.genecards.org/cgi-bin/carddisp.pl?gene=EXOC3L2</a> |
| PRDX4   | Peroxiredoxin 4                                                 | Protein Coding | 44 | GC0XP023665 | 7.215439 | <a href="https://www.genecards.org/cgi-bin/carddisp.pl?gene=PRDX4">https://www.genecards.org/cgi-bin/carddisp.pl?gene=PRDX4</a>     |
| SLC15A1 | Solute Carrier Family 15 Member 1                               | Protein Coding | 45 | GC13M098683 | 7.212022 | <a href="https://www.genecards.org/cgi-bin/carddisp.pl?gene=SLC15A1">https://www.genecards.org/cgi-bin/carddisp.pl?gene=SLC15A1</a> |
| UBE2D2  | Ubiquitin Conjugating Enzyme E2 D2                              | Protein Coding | 45 | GC05P139526 | 7.208131 | <a href="https://www.genecards.org/cgi-bin/carddisp.pl?gene=UBE2D2">https://www.genecards.org/cgi-bin/carddisp.pl?gene=UBE2D2</a>   |

|          |                                                            |                |    |             |          |                                                                                                                                       |
|----------|------------------------------------------------------------|----------------|----|-------------|----------|---------------------------------------------------------------------------------------------------------------------------------------|
| MIR136   | MicroRNA 136                                               | RNA Gene       | 19 | GC14P105979 | 7.201509 | <a href="https://www.genecards.org/cgi-bin/carddisp.pl?gene=MIR136">https://www.genecards.org/cgi-bin/carddisp.pl?gene=MIR136</a>     |
| CLEC12A  | C-Type Lectin Domain Family 12 Member A                    | Protein Coding | 38 | GC12P009951 | 7.200759 | <a href="https://www.genecards.org/cgi-bin/carddisp.pl?gene=CLEC12A">https://www.genecards.org/cgi-bin/carddisp.pl?gene=CLEC12A</a>   |
| LGALS3BP | Galectin 3 Binding Protein                                 | Protein Coding | 41 | GC17M078971 | 7.200254 | <a href="https://www.genecards.org/cgi-bin/carddisp.pl?gene=LGALS3BP">https://www.genecards.org/cgi-bin/carddisp.pl?gene=LGALS3BP</a> |
| SLC5A8   | Solute Carrier Family 5 Member 8                           | Protein Coding | 43 | GC12M101155 | 7.198617 | <a href="https://www.genecards.org/cgi-bin/carddisp.pl?gene=SLC5A8">https://www.genecards.org/cgi-bin/carddisp.pl?gene=SLC5A8</a>     |
| MIR494   | MicroRNA 494                                               | RNA Gene       | 16 | GC14P106333 | 7.196767 | <a href="https://www.genecards.org/cgi-bin/carddisp.pl?gene=MIR494">https://www.genecards.org/cgi-bin/carddisp.pl?gene=MIR494</a>     |
| RBX1     | Ring-Box 1                                                 | Protein Coding | 43 | GC22P040951 | 7.196194 | <a href="https://www.genecards.org/cgi-bin/carddisp.pl?gene=RBX1">https://www.genecards.org/cgi-bin/carddisp.pl?gene=RBX1</a>         |
| SETD1A   | SET Domain Containing 1A, Histone Lysine Methyltransferase | Protein Coding | 41 | GC16P032486 | 7.195914 | <a href="https://www.genecards.org/cgi-bin/carddisp.pl?gene=SETD1A">https://www.genecards.org/cgi-bin/carddisp.pl?gene=SETD1A</a>     |
| CYP2A7   | Cytochrome P450 Family 2 Subfamily A Member 7              | Protein Coding | 39 | GC19M040875 | 7.193451 | <a href="https://www.genecards.org/cgi-bin/carddisp.pl?gene=CYP2A7">https://www.genecards.org/cgi-bin/carddisp.pl?gene=CYP2A7</a>     |
| HM13     | Histocompatibility Minor 13                                | Protein Coding | 39 | GC20P031514 | 7.192185 | <a href="https://www.genecards.org/cgi-bin/carddisp.pl?gene=HM13">https://www.genecards.org/cgi-bin/carddisp.pl?gene=HM13</a>         |
| CEP152   | Centrosomal Protein 152                                    | Protein Coding | 39 | GC15M048663 | 7.186653 | <a href="https://www.genecards.org/cgi-bin/carddisp.pl?gene=CEP152">https://www.genecards.org/cgi-bin/carddisp.pl?gene=CEP152</a>     |
| S100A6   | S100 Calcium Binding Protein A6                            | Protein Coding | 43 | GC01M153535 | 7.183607 | <a href="https://www.genecards.org/cgi-bin/carddisp.pl?gene=S100A6">https://www.genecards.org/cgi-bin/carddisp.pl?gene=S100A6</a>     |
| TMLHE    | Trimethyllysine Hydroxylase, Epsilon                       | Protein Coding | 43 | GC0XM155489 | 7.180274 | <a href="https://www.genecards.org/cgi-bin/carddisp.pl?gene=TMLHE">https://www.genecards.org/cgi-bin/carddisp.pl?gene=TMLHE</a>       |
| CA9      | Carbonic Anhydrase 9                                       | Protein Coding | 45 | GC09P035673 | 7.177135 | <a href="https://www.genecards.org/cgi-bin/carddisp.pl?gene=CA9">https://www.genecards.org/cgi-bin/carddisp.pl?gene=CA9</a>           |
| MAX      | MYC Associated Factor X                                    | Protein Coding | 48 | GC14M065009 | 7.176951 | <a href="https://www.genecards.org/cgi-bin/carddisp.pl?gene=MAX">https://www.genecards.org/cgi-bin/carddisp.pl?gene=MAX</a>           |
| PPARGC1B | PPARG Coactivator 1 Beta                                   | Protein Coding | 36 | GC05P149730 | 7.171171 | <a href="https://www.genecards.org/cgi-bin/carddisp.pl?gene=PPARGC1B">https://www.genecards.org/cgi-bin/carddisp.pl?gene=PPARGC1B</a> |
| ACYP1    | Acylphosphatase 1                                          | Protein Coding | 38 | GC14M075053 | 7.169619 | <a href="https://www.genecards.org/cgi-bin/carddisp.pl?gene=ACYP1">https://www.genecards.org/cgi-bin/carddisp.pl?gene=ACYP1</a>       |
| E2F4     | E2F Transcription Factor 4                                 | Protein Coding | 46 | GC16P067192 | 7.16264  | <a href="https://www.genecards.org/cgi-bin/carddisp.pl?gene=E2F4">https://www.genecards.org/cgi-bin/carddisp.pl?gene=E2F4</a>         |
| TK1      | Thymidine Kinase 1                                         | Protein Coding | 47 | GC17M078175 | 7.157782 | <a href="https://www.genecards.org/cgi-bin/carddisp.pl?gene=TK1">https://www.genecards.org/cgi-bin/carddisp.pl?gene=TK1</a>           |
| PTGER2   | Prostaglandin E Receptor 2                                 | Protein Coding | 49 | GC14P052314 | 7.149096 | <a href="https://www.genecards.org/cgi-bin/carddisp.pl?gene=PTGER2">https://www.genecards.org/cgi-bin/carddisp.pl?gene=PTGER2</a>     |
| SLC22A3  | Solute Carrier Family 22 Member 3                          | Protein Coding | 45 | GC06P160348 | 7.147097 | <a href="https://www.genecards.org/cgi-bin/carddisp.pl?gene=SLC22A3">https://www.genecards.org/cgi-bin/carddisp.pl?gene=SLC22A3</a>   |

|           |                                                 |                |    |             |          |                                                                                                                                         |
|-----------|-------------------------------------------------|----------------|----|-------------|----------|-----------------------------------------------------------------------------------------------------------------------------------------|
| MAP3K11   | Mitogen-Activated Protein Kinase Kinase 11      | Protein Coding | 48 | GC11M069402 | 7.14581  | <a href="https://www.genecards.org/cgi-bin/carddisp.pl?gene=MAP3K11">https://www.genecards.org/cgi-bin/carddisp.pl?gene=MAP3K11</a>     |
| TAF6      | TATA-Box Binding Protein Associated Factor 6    | Protein Coding | 41 | GC07M100107 | 7.142289 | <a href="https://www.genecards.org/cgi-bin/carddisp.pl?gene=TAF6">https://www.genecards.org/cgi-bin/carddisp.pl?gene=TAF6</a>           |
| MACROH2A1 | MacroH2A.1 Histone                              | Protein Coding | 36 | GC05M135334 | 7.131829 | <a href="https://www.genecards.org/cgi-bin/carddisp.pl?gene=MACROH2A1">https://www.genecards.org/cgi-bin/carddisp.pl?gene=MACROH2A1</a> |
| INPP4A    | Inositol Polyphosphate -4- Phosphatase Type I A | Protein Coding | 43 | GC02P098465 | 7.124414 | <a href="https://www.genecards.org/cgi-bin/carddisp.pl?gene=INPP4A">https://www.genecards.org/cgi-bin/carddisp.pl?gene=INPP4A</a>       |
| APOC4     | Apolipoprotein C4                               | Protein Coding | 36 | GC19P044943 | 7.117778 | <a href="https://www.genecards.org/cgi-bin/carddisp.pl?gene=APOC4">https://www.genecards.org/cgi-bin/carddisp.pl?gene=APOC4</a>         |
| PREP      | Prolyl Endopeptidase                            | Protein Coding | 43 | GC06M105277 | 7.115729 | <a href="https://www.genecards.org/cgi-bin/carddisp.pl?gene=PREP">https://www.genecards.org/cgi-bin/carddisp.pl?gene=PREP</a>           |
| DNM3      | Dynamin 3                                       | Protein Coding | 44 | GC01P171841 | 7.115562 | <a href="https://www.genecards.org/cgi-bin/carddisp.pl?gene=DNM3">https://www.genecards.org/cgi-bin/carddisp.pl?gene=DNM3</a>           |
| DDHD1     | DDHD Domain Containing 1                        | Protein Coding | 39 | GC14M053036 | 7.115196 | <a href="https://www.genecards.org/cgi-bin/carddisp.pl?gene=DDHD1">https://www.genecards.org/cgi-bin/carddisp.pl?gene=DDHD1</a>         |
| RPS25     | Ribosomal Protein S25                           | Protein Coding | 38 | GC11M119015 | 7.112805 | <a href="https://www.genecards.org/cgi-bin/carddisp.pl?gene=RPS25">https://www.genecards.org/cgi-bin/carddisp.pl?gene=RPS25</a>         |
| SLC5A1    | Solute Carrier Family 5 Member 1                | Protein Coding | 50 | GC22P032043 | 7.112461 | <a href="https://www.genecards.org/cgi-bin/carddisp.pl?gene=SLC5A1">https://www.genecards.org/cgi-bin/carddisp.pl?gene=SLC5A1</a>       |
| HSD17B3   | Hydroxysteroid 17-Beta Dehydrogenase 3          | Protein Coding | 48 | GC09M096240 | 7.112155 | <a href="https://www.genecards.org/cgi-bin/carddisp.pl?gene=HSD17B3">https://www.genecards.org/cgi-bin/carddisp.pl?gene=HSD17B3</a>     |
| MIR125B2  | MicroRNA 125b-2                                 | RNA Gene       | 21 | GC21P016590 | 7.100262 | <a href="https://www.genecards.org/cgi-bin/carddisp.pl?gene=MIR125B2">https://www.genecards.org/cgi-bin/carddisp.pl?gene=MIR125B2</a>   |
| TRIO      | Trio Rho Guanine Nucleotide Exchange Factor     | Protein Coding | 45 | GC05P014143 | 7.086922 | <a href="https://www.genecards.org/cgi-bin/carddisp.pl?gene=TRIO">https://www.genecards.org/cgi-bin/carddisp.pl?gene=TRIO</a>           |
| NUDT7     | Nudix Hydrolase 7                               | Protein Coding | 38 | GC16P077722 | 7.081073 | <a href="https://www.genecards.org/cgi-bin/carddisp.pl?gene=NUDT7">https://www.genecards.org/cgi-bin/carddisp.pl?gene=NUDT7</a>         |
| HSPA2     | Heat Shock Protein Family A (Hsp70) Member 2    | Protein Coding | 44 | GC14P064535 | 7.076354 | <a href="https://www.genecards.org/cgi-bin/carddisp.pl?gene=HSPA2">https://www.genecards.org/cgi-bin/carddisp.pl?gene=HSPA2</a>         |
| ASNS      | Asparagine Synthetase (Glutamine-Hydrolyzing)   | Protein Coding | 47 | GC07M097854 | 7.069455 | <a href="https://www.genecards.org/cgi-bin/carddisp.pl?gene=ASNS">https://www.genecards.org/cgi-bin/carddisp.pl?gene=ASNS</a>           |
| GJA4      | Gap Junction Protein Alpha 4                    | Protein Coding | 44 | GC01P034792 | 7.066598 | <a href="https://www.genecards.org/cgi-bin/carddisp.pl?gene=GJA4">https://www.genecards.org/cgi-bin/carddisp.pl?gene=GJA4</a>           |
| INSIG2    | Insulin Induced Gene 2                          | Protein Coding | 41 | GC02P118088 | 7.063419 | <a href="https://www.genecards.org/cgi-bin/carddisp.pl?gene=INSIG2">https://www.genecards.org/cgi-bin/carddisp.pl?gene=INSIG2</a>       |

|          |                                                         |                |    |             |          |                                                                                                                                       |
|----------|---------------------------------------------------------|----------------|----|-------------|----------|---------------------------------------------------------------------------------------------------------------------------------------|
| OSMR     | Oncostatin M Receptor                                   | Protein Coding | 45 | GC05P038845 | 7.063321 | <a href="https://www.genecards.org/cgi-bin/carddisp.pl?gene=OSMR">https://www.genecards.org/cgi-bin/carddisp.pl?gene=OSMR</a>         |
| SERPINB5 | Serpin Family B Member 5                                | Protein Coding | 44 | GC18P063476 | 7.055657 | <a href="https://www.genecards.org/cgi-bin/carddisp.pl?gene=SERPINB5">https://www.genecards.org/cgi-bin/carddisp.pl?gene=SERPINB5</a> |
| PTGES    | Prostaglandin E Synthase                                | Protein Coding | 42 | GC09M129738 | 7.054958 | <a href="https://www.genecards.org/cgi-bin/carddisp.pl?gene=PTGES">https://www.genecards.org/cgi-bin/carddisp.pl?gene=PTGES</a>       |
| LYVE1    | Lymphatic Vessel Endothelial Hyaluronan Receptor 1      | Protein Coding | 43 | GC11M010713 | 7.053092 | <a href="https://www.genecards.org/cgi-bin/carddisp.pl?gene=LYVE1">https://www.genecards.org/cgi-bin/carddisp.pl?gene=LYVE1</a>       |
| SOX11    | SRY-Box Transcription Factor 11                         | Protein Coding | 42 | GC02P005703 | 7.051542 | <a href="https://www.genecards.org/cgi-bin/carddisp.pl?gene=SOX11">https://www.genecards.org/cgi-bin/carddisp.pl?gene=SOX11</a>       |
| CSF2RA   | Colony Stimulating Factor 2 Receptor Subunit Alpha      | Protein Coding | 46 | GC0XP001333 | 7.043605 | <a href="https://www.genecards.org/cgi-bin/carddisp.pl?gene=CSF2RA">https://www.genecards.org/cgi-bin/carddisp.pl?gene=CSF2RA</a>     |
| GEMIN4   | Gem Nuclear Organelle Associated Protein 4              | Protein Coding | 39 | GC17M000744 | 7.038875 | <a href="https://www.genecards.org/cgi-bin/carddisp.pl?gene=GEMIN4">https://www.genecards.org/cgi-bin/carddisp.pl?gene=GEMIN4</a>     |
| AQP5     | Aquaporin 5                                             | Protein Coding | 47 | GC12P049961 | 7.038698 | <a href="https://www.genecards.org/cgi-bin/carddisp.pl?gene=AQP5">https://www.genecards.org/cgi-bin/carddisp.pl?gene=AQP5</a>         |
| H1-4     | H1.4 Linker Histone, Cluster Member                     | Protein Coding | 36 | GC06P055576 | 7.035132 | <a href="https://www.genecards.org/cgi-bin/carddisp.pl?gene=H1-4">https://www.genecards.org/cgi-bin/carddisp.pl?gene=H1-4</a>         |
| VAT1     | Vesicle Amine Transport 1                               | Protein Coding | 38 | GC17M043014 | 7.031759 | <a href="https://www.genecards.org/cgi-bin/carddisp.pl?gene=VAT1">https://www.genecards.org/cgi-bin/carddisp.pl?gene=VAT1</a>         |
| CMKLR1   | Chemerin Chemokine-Like Receptor 1                      | Protein Coding | 41 | GC12M108288 | 7.027706 | <a href="https://www.genecards.org/cgi-bin/carddisp.pl?gene=CMKLR1">https://www.genecards.org/cgi-bin/carddisp.pl?gene=CMKLR1</a>     |
| CENPJ    | Centromere Protein J                                    | Protein Coding | 43 | GC13M024882 | 7.025882 | <a href="https://www.genecards.org/cgi-bin/carddisp.pl?gene=CENPJ">https://www.genecards.org/cgi-bin/carddisp.pl?gene=CENPJ</a>       |
| POLR2B   | RNA Polymerase II Subunit B                             | Protein Coding | 43 | GC04P056977 | 7.024299 | <a href="https://www.genecards.org/cgi-bin/carddisp.pl?gene=POLR2B">https://www.genecards.org/cgi-bin/carddisp.pl?gene=POLR2B</a>     |
| BRD7     | Bromodomain Containing 7                                | Protein Coding | 43 | GC16M050313 | 7.023968 | <a href="https://www.genecards.org/cgi-bin/carddisp.pl?gene=BRD7">https://www.genecards.org/cgi-bin/carddisp.pl?gene=BRD7</a>         |
| VPS51    | VPS51 Subunit Of GARP Complex                           | Protein Coding | 37 | GC11P065089 | 7.020533 | <a href="https://www.genecards.org/cgi-bin/carddisp.pl?gene=VPS51">https://www.genecards.org/cgi-bin/carddisp.pl?gene=VPS51</a>       |
| SDR9C7   | Short Chain Dehydrogenase /Reductase Family 9C Member 7 | Protein Coding | 38 | GC12M056923 | 7.01707  | <a href="https://www.genecards.org/cgi-bin/carddisp.pl?gene=SDR9C7">https://www.genecards.org/cgi-bin/carddisp.pl?gene=SDR9C7</a>     |
| CHGB     | Chromogranin B                                          | Protein Coding | 40 | GC20P005911 | 7.013568 | <a href="https://www.genecards.org/cgi-bin/carddisp.pl?gene=CHGB">https://www.genecards.org/cgi-bin/carddisp.pl?gene=CHGB</a>         |
| ADAM9    | ADAM Metallopeptidase Domain 9                          | Protein Coding | 48 | GC08P038996 | 7.013069 | <a href="https://www.genecards.org/cgi-bin/carddisp.pl?gene=ADAM9">https://www.genecards.org/cgi-bin/carddisp.pl?gene=ADAM9</a>       |
| SULF1    | Sulfatase 1                                             | Protein Coding | 42 | GC08P069466 | 7.010864 | <a href="https://www.genecards.org/cgi-bin/carddisp.pl?gene=SULF1">https://www.genecards.org/cgi-bin/carddisp.pl?gene=SULF1</a>       |

|        |                                                        |                |    |             |          |                                                                                                                                   |
|--------|--------------------------------------------------------|----------------|----|-------------|----------|-----------------------------------------------------------------------------------------------------------------------------------|
| MYF5   | Myogenic Factor 5                                      | Protein Coding | 41 | GC12P080716 | 7.008314 | <a href="https://www.genecards.org/cgi-bin/carddisp.pl?gene=MYF5">https://www.genecards.org/cgi-bin/carddisp.pl?gene=MYF5</a>     |
| AOC1   | Amine Oxidase Copper Containing 1                      | Protein Coding | 40 | GC07P150824 | 7.006145 | <a href="https://www.genecards.org/cgi-bin/carddisp.pl?gene=AOC1">https://www.genecards.org/cgi-bin/carddisp.pl?gene=AOC1</a>     |
| HSPB3  | Heat Shock Protein Family B (Small) Member 3           | Protein Coding | 40 | GC05P054456 | 6.995833 | <a href="https://www.genecards.org/cgi-bin/carddisp.pl?gene=HSPB3">https://www.genecards.org/cgi-bin/carddisp.pl?gene=HSPB3</a>   |
| CCNH   | Cyclin H                                               | Protein Coding | 47 | GC05M087311 | 6.994796 | <a href="https://www.genecards.org/cgi-bin/carddisp.pl?gene=CCNH">https://www.genecards.org/cgi-bin/carddisp.pl?gene=CCNH</a>     |
| SLC5A2 | Solute Carrier Family 5 Member 2                       | Protein Coding | 47 | GC16P032579 | 6.99471  | <a href="https://www.genecards.org/cgi-bin/carddisp.pl?gene=SLC5A2">https://www.genecards.org/cgi-bin/carddisp.pl?gene=SLC5A2</a> |
| JUND   | JunD Proto-Oncogene, AP-1 Transcription Factor Subunit | Protein Coding | 43 | GC19M018279 | 6.993617 | <a href="https://www.genecards.org/cgi-bin/carddisp.pl?gene=JUND">https://www.genecards.org/cgi-bin/carddisp.pl?gene=JUND</a>     |
| WNT2B  | Wnt Family Member 2B                                   | Protein Coding | 45 | GC01P112466 | 6.985282 | <a href="https://www.genecards.org/cgi-bin/carddisp.pl?gene=WNT2B">https://www.genecards.org/cgi-bin/carddisp.pl?gene=WNT2B</a>   |
| TGM3   | Transglutaminase 3                                     | Protein Coding | 43 | GC20P002296 | 6.98355  | <a href="https://www.genecards.org/cgi-bin/carddisp.pl?gene=TGM3">https://www.genecards.org/cgi-bin/carddisp.pl?gene=TGM3</a>     |
| B3GAT1 | Beta-1,3-Glucuronyltransferase 1                       | Protein Coding | 44 | GC11M134378 | 6.974327 | <a href="https://www.genecards.org/cgi-bin/carddisp.pl?gene=B3GAT1">https://www.genecards.org/cgi-bin/carddisp.pl?gene=B3GAT1</a> |
| MIR296 | MicroRNA 296                                           | RNA Gene       | 17 | GC20M058817 | 6.972168 | <a href="https://www.genecards.org/cgi-bin/carddisp.pl?gene=MIR296">https://www.genecards.org/cgi-bin/carddisp.pl?gene=MIR296</a> |
| PSMC3  | Proteasome 26S Subunit, ATPase 3                       | Protein Coding | 43 | GC11M069001 | 6.966324 | <a href="https://www.genecards.org/cgi-bin/carddisp.pl?gene=PSMC3">https://www.genecards.org/cgi-bin/carddisp.pl?gene=PSMC3</a>   |
| CAMKK2 | Calcium/Calmodulin Dependent Protein Kinase 2          | Protein Coding | 47 | GC12M121496 | 6.966138 | <a href="https://www.genecards.org/cgi-bin/carddisp.pl?gene=CAMKK2">https://www.genecards.org/cgi-bin/carddisp.pl?gene=CAMKK2</a> |
| FDX1   | Ferredoxin 1                                           | Protein Coding | 41 | GC11P110429 | 6.962153 | <a href="https://www.genecards.org/cgi-bin/carddisp.pl?gene=FDX1">https://www.genecards.org/cgi-bin/carddisp.pl?gene=FDX1</a>     |
| CANT1  | Calcium Activated Nucleotidase 1                       | Protein Coding | 45 | GC17M078992 | 6.959641 | <a href="https://www.genecards.org/cgi-bin/carddisp.pl?gene=CANT1">https://www.genecards.org/cgi-bin/carddisp.pl?gene=CANT1</a>   |
| LUM    | Lumican                                                | Protein Coding | 42 | GC12M091102 | 6.958346 | <a href="https://www.genecards.org/cgi-bin/carddisp.pl?gene=LUM">https://www.genecards.org/cgi-bin/carddisp.pl?gene=LUM</a>       |
| IFT57  | Intraflagellar Transport 57                            | Protein Coding | 40 | GC03M108160 | 6.954612 | <a href="https://www.genecards.org/cgi-bin/carddisp.pl?gene=IFT57">https://www.genecards.org/cgi-bin/carddisp.pl?gene=IFT57</a>   |
| LAMA1  | Laminin Subunit Alpha 1                                | Protein Coding | 47 | GC18M006941 | 6.948433 | <a href="https://www.genecards.org/cgi-bin/carddisp.pl?gene=LAMA1">https://www.genecards.org/cgi-bin/carddisp.pl?gene=LAMA1</a>   |
| MIR532 | MicroRNA 532                                           | RNA Gene       | 16 | GC0XP050004 | 6.94752  | <a href="https://www.genecards.org/cgi-bin/carddisp.pl?gene=MIR532">https://www.genecards.org/cgi-bin/carddisp.pl?gene=MIR532</a> |
| CKB    | Creatine Kinase B                                      | Protein Coding | 46 | GC14M103519 | 6.943268 | <a href="https://www.genecards.org/cgi-bin/carddisp.pl?gene=CKB">https://www.genecards.org/cgi-bin/carddisp.pl?gene=CKB</a>       |
| GNRHR  | Gonadotropin Releasing Hormone Receptor                | Protein Coding | 48 | GC04M067737 | 6.940283 | <a href="https://www.genecards.org/cgi-bin/carddisp.pl?gene=GNRHR">https://www.genecards.org/cgi-bin/carddisp.pl?gene=GNRHR</a>   |
| CUL1   | Cullin 1                                               | Protein Coding | 45 | GC07P148697 | 6.936001 | <a href="https://www.genecards.org/cgi-bin/carddisp.pl?gene=CUL1">https://www.genecards.org/cgi-bin/carddisp.pl?gene=CUL1</a>     |



|         |                                                                          |                |    |             |          |                                                                                                                                     |
|---------|--------------------------------------------------------------------------|----------------|----|-------------|----------|-------------------------------------------------------------------------------------------------------------------------------------|
| SMPD2   | Sphingomyelin Phosphodiesterase 2                                        | Protein Coding | 41 | GC06P109440 | 6.931005 | <a href="https://www.genecards.org/cgi-bin/carddisp.pl?gene=SMPD2">https://www.genecards.org/cgi-bin/carddisp.pl?gene=SMPD2</a>     |
| LDHB    | Lactate Dehydrogenase B                                                  | Protein Coding | 47 | GC12M021635 | 6.926804 | <a href="https://www.genecards.org/cgi-bin/carddisp.pl?gene=LDHB">https://www.genecards.org/cgi-bin/carddisp.pl?gene=LDHB</a>       |
| POLA1   | DNA Polymerase Alpha 1, Catalytic Subunit                                | Protein Coding | 46 | GC0XP024693 | 6.925795 | <a href="https://www.genecards.org/cgi-bin/carddisp.pl?gene=POLA1">https://www.genecards.org/cgi-bin/carddisp.pl?gene=POLA1</a>     |
| RBM20   | RNA Binding Motif Protein 20                                             | Protein Coding | 36 | GC10P110644 | 6.923946 | <a href="https://www.genecards.org/cgi-bin/carddisp.pl?gene=RBM20">https://www.genecards.org/cgi-bin/carddisp.pl?gene=RBM20</a>     |
| PTDSS1  | Phosphatidylserine Synthase 1                                            | Protein Coding | 45 | GC08P096261 | 6.920557 | <a href="https://www.genecards.org/cgi-bin/carddisp.pl?gene=PTDSS1">https://www.genecards.org/cgi-bin/carddisp.pl?gene=PTDSS1</a>   |
| NRGN    | Neurogranin                                                              | Protein Coding | 39 | GC11P124739 | 6.917172 | <a href="https://www.genecards.org/cgi-bin/carddisp.pl?gene=NRGN">https://www.genecards.org/cgi-bin/carddisp.pl?gene=NRGN</a>       |
| EFNB1   | Ephrin B1                                                                | Protein Coding | 47 | GC0XP068828 | 6.912486 | <a href="https://www.genecards.org/cgi-bin/carddisp.pl?gene=EFNB1">https://www.genecards.org/cgi-bin/carddisp.pl?gene=EFNB1</a>     |
| FLOT1   | Flotillin 1                                                              | Protein Coding | 42 | GC06M046803 | 6.89647  | <a href="https://www.genecards.org/cgi-bin/carddisp.pl?gene=FLOT1">https://www.genecards.org/cgi-bin/carddisp.pl?gene=FLOT1</a>     |
| PBRM1   | Polybromo 1                                                              | Protein Coding | 45 | GC03M052545 | 6.892432 | <a href="https://www.genecards.org/cgi-bin/carddisp.pl?gene=PBRM1">https://www.genecards.org/cgi-bin/carddisp.pl?gene=PBRM1</a>     |
| POU1F1  | POU Class 1 Homeobox 1                                                   | Protein Coding | 44 | GC03M087259 | 6.891148 | <a href="https://www.genecards.org/cgi-bin/carddisp.pl?gene=POU1F1">https://www.genecards.org/cgi-bin/carddisp.pl?gene=POU1F1</a>   |
| MGAT1   | Alpha-1,3-Mannosyl-Glycoprotein 2-Beta-N-Acetylglucosaminyltransferase   | Protein Coding | 44 | GC05M180936 | 6.882869 | <a href="https://www.genecards.org/cgi-bin/carddisp.pl?gene=MGAT1">https://www.genecards.org/cgi-bin/carddisp.pl?gene=MGAT1</a>     |
| SLURP1  | Secreted LY6/PLAUR Domain Containing 1                                   | Protein Coding | 43 | GC08M142740 | 6.877222 | <a href="https://www.genecards.org/cgi-bin/carddisp.pl?gene=SLURP1">https://www.genecards.org/cgi-bin/carddisp.pl?gene=SLURP1</a>   |
| RDX     | Radixin                                                                  | Protein Coding | 50 | GC11M109864 | 6.876036 | <a href="https://www.genecards.org/cgi-bin/carddisp.pl?gene=RDX">https://www.genecards.org/cgi-bin/carddisp.pl?gene=RDX</a>         |
| ONECUT2 | One Cut Homeobox 2 Retention In Endoplasmic Reticulum Sorting Receptor 1 | Protein Coding | 36 | GC18P057436 | 6.871656 | <a href="https://www.genecards.org/cgi-bin/carddisp.pl?gene=ONECUT2">https://www.genecards.org/cgi-bin/carddisp.pl?gene=ONECUT2</a> |
| RER1    | Microcephalin 1                                                          | Protein Coding | 35 | GC01P002391 | 6.869596 | <a href="https://www.genecards.org/cgi-bin/carddisp.pl?gene=RER1">https://www.genecards.org/cgi-bin/carddisp.pl?gene=RER1</a>       |
| MCPH1   | NFU1 Iron-Sulfur Cluster Scaffold                                        | Protein Coding | 41 | GC08P006406 | 6.862211 | <a href="https://www.genecards.org/cgi-bin/carddisp.pl?gene=MCPH1">https://www.genecards.org/cgi-bin/carddisp.pl?gene=MCPH1</a>     |
| NFU1    | 3-Hydroxybutyrate Dehydrogenase 1                                        | Protein Coding | 43 | GC02M069395 | 6.861397 | <a href="https://www.genecards.org/cgi-bin/carddisp.pl?gene=NFU1">https://www.genecards.org/cgi-bin/carddisp.pl?gene=NFU1</a>       |
| BDH1    |                                                                          | Protein Coding | 44 | GC03M197519 | 6.854402 | <a href="https://www.genecards.org/cgi-bin/carddisp.pl?gene=BDH1">https://www.genecards.org/cgi-bin/carddisp.pl?gene=BDH1</a>       |

|         |                                                                    |                |    |             |          |                                                                                                                                     |
|---------|--------------------------------------------------------------------|----------------|----|-------------|----------|-------------------------------------------------------------------------------------------------------------------------------------|
| LPAR1   | Lysophosphatidic Acid Receptor 1                                   | Protein Coding | 47 | GC09M110873 | 6.854399 | <a href="https://www.genecards.org/cgi-bin/carddisp.pl?gene=LPAR1">https://www.genecards.org/cgi-bin/carddisp.pl?gene=LPAR1</a>     |
| TRPV6   | Transient Receptor Potential Cation Channel Subfamily V Member 6   | Protein Coding | 47 | GC07M142871 | 6.849349 | <a href="https://www.genecards.org/cgi-bin/carddisp.pl?gene=TRPV6">https://www.genecards.org/cgi-bin/carddisp.pl?gene=TRPV6</a>     |
| CBFB    | Core-Binding Factor Subunit Beta                                   | Protein Coding | 45 | GC16P067063 | 6.847279 | <a href="https://www.genecards.org/cgi-bin/carddisp.pl?gene=CBFB">https://www.genecards.org/cgi-bin/carddisp.pl?gene=CBFB</a>       |
| KHDRBS3 | KH RNA Binding Domain Containing, Signal Transduction Associated 3 | Protein Coding | 39 | GC08P135457 | 6.846521 | <a href="https://www.genecards.org/cgi-bin/carddisp.pl?gene=KHDRBS3">https://www.genecards.org/cgi-bin/carddisp.pl?gene=KHDRBS3</a> |
| TULP3   | TUB Like Protein 3                                                 | Protein Coding | 41 | GC12P002870 | 6.843833 | <a href="https://www.genecards.org/cgi-bin/carddisp.pl?gene=TULP3">https://www.genecards.org/cgi-bin/carddisp.pl?gene=TULP3</a>     |
| MYOM1   | Myomesin 1                                                         | Protein Coding | 40 | GC18M003066 | 6.843328 | <a href="https://www.genecards.org/cgi-bin/carddisp.pl?gene=MYOM1">https://www.genecards.org/cgi-bin/carddisp.pl?gene=MYOM1</a>     |
| BCL2L2  | BCL2 Like 2                                                        | Protein Coding | 45 | GC14P026355 | 6.826106 | <a href="https://www.genecards.org/cgi-bin/carddisp.pl?gene=BCL2L2">https://www.genecards.org/cgi-bin/carddisp.pl?gene=BCL2L2</a>   |
| RICTOR  | RPTOR Independent Companion Of MTOR Complex 2                      | Protein Coding | 45 | GC05M038937 | 6.825677 | <a href="https://www.genecards.org/cgi-bin/carddisp.pl?gene=RICTOR">https://www.genecards.org/cgi-bin/carddisp.pl?gene=RICTOR</a>   |
| HNRNPC  | Heterogeneous Nuclear Ribonucleoprotein C                          | Protein Coding | 42 | GC14M021210 | 6.823275 | <a href="https://www.genecards.org/cgi-bin/carddisp.pl?gene=HNRNPC">https://www.genecards.org/cgi-bin/carddisp.pl?gene=HNRNPC</a>   |
| MTDH    | Metadherin                                                         | Protein Coding | 41 | GC08P097643 | 6.820546 | <a href="https://www.genecards.org/cgi-bin/carddisp.pl?gene=MTDH">https://www.genecards.org/cgi-bin/carddisp.pl?gene=MTDH</a>       |
| MEOX2   | Mesenchyme Homeobox 2                                              | Protein Coding | 43 | GC07M015617 | 6.816932 | <a href="https://www.genecards.org/cgi-bin/carddisp.pl?gene=MEOX2">https://www.genecards.org/cgi-bin/carddisp.pl?gene=MEOX2</a>     |
| RBM39   | RNA Binding Motif Protein 39                                       | Protein Coding | 38 | GC20M035703 | 6.813349 | <a href="https://www.genecards.org/cgi-bin/carddisp.pl?gene=RBM39">https://www.genecards.org/cgi-bin/carddisp.pl?gene=RBM39</a>     |
| HPR     | Haptoglobin-Related Protein                                        | Protein Coding | 40 | GC16P072097 | 6.810152 | <a href="https://www.genecards.org/cgi-bin/carddisp.pl?gene=HPR">https://www.genecards.org/cgi-bin/carddisp.pl?gene=HPR</a>         |
| KCND2   | Potassium Voltage-Gated Channel Subfamily D Member 2               | Protein Coding | 45 | GC07P120273 | 6.809456 | <a href="https://www.genecards.org/cgi-bin/carddisp.pl?gene=KCND2">https://www.genecards.org/cgi-bin/carddisp.pl?gene=KCND2</a>     |
| SH2B1   | SH2B Adaptor Protein 1                                             | Protein Coding | 44 | GC16P032268 | 6.80704  | <a href="https://www.genecards.org/cgi-bin/carddisp.pl?gene=SH2B1">https://www.genecards.org/cgi-bin/carddisp.pl?gene=SH2B1</a>     |
| FPGS    | Folylpolyglutamate Synthase Leucyl And                             | Protein Coding | 43 | GC09P127794 | 6.807037 | <a href="https://www.genecards.org/cgi-bin/carddisp.pl?gene=FPGS">https://www.genecards.org/cgi-bin/carddisp.pl?gene=FPGS</a>       |
| LNPEP   | Cystinyl Aminopeptidase                                            | Protein Coding | 46 | GC05P096935 | 6.797159 | <a href="https://www.genecards.org/cgi-bin/carddisp.pl?gene=LNPEP">https://www.genecards.org/cgi-bin/carddisp.pl?gene=LNPEP</a>     |

|          |                                                     |                |    |             |          |                                                                                                                                       |
|----------|-----------------------------------------------------|----------------|----|-------------|----------|---------------------------------------------------------------------------------------------------------------------------------------|
| NNT      | Nicotinamide Nucleotide Transhydrogenase            | Protein Coding | 46 | GC05P043668 | 6.795671 | <a href="https://www.genecards.org/cgi-bin/carddisp.pl?gene=NNT">https://www.genecards.org/cgi-bin/carddisp.pl?gene=NNT</a>           |
| CHN1     | Chimerin 1                                          | Protein Coding | 48 | GC02M174799 | 6.795224 | <a href="https://www.genecards.org/cgi-bin/carddisp.pl?gene=CHN1">https://www.genecards.org/cgi-bin/carddisp.pl?gene=CHN1</a>         |
| SELENOI  | Selenoprotein I                                     | Protein Coding | 30 | GC02P026310 | 6.792241 | <a href="https://www.genecards.org/cgi-bin/carddisp.pl?gene=SELENOI">https://www.genecards.org/cgi-bin/carddisp.pl?gene=SELENOI</a>   |
| MCTP2    | Multiple C2 And Transmembrane Domain Containing 2   | Protein Coding | 41 | GC15P100162 | 6.787868 | <a href="https://www.genecards.org/cgi-bin/carddisp.pl?gene=MCTP2">https://www.genecards.org/cgi-bin/carddisp.pl?gene=MCTP2</a>       |
| INSIG1   | Insulin Induced Gene 1                              | Protein Coding | 40 | GC07P155297 | 6.787679 | <a href="https://www.genecards.org/cgi-bin/carddisp.pl?gene=INSIG1">https://www.genecards.org/cgi-bin/carddisp.pl?gene=INSIG1</a>     |
| GALNT2   | Polypeptide N-Acetylgalactosaminyltransferase 2     | Protein Coding | 47 | GC01P230057 | 6.787605 | <a href="https://www.genecards.org/cgi-bin/carddisp.pl?gene=GALNT2">https://www.genecards.org/cgi-bin/carddisp.pl?gene=GALNT2</a>     |
| GNAI3    | G Protein Subunit Alpha I3                          | Protein Coding | 48 | GC01P109548 | 6.782274 | <a href="https://www.genecards.org/cgi-bin/carddisp.pl?gene=GNAI3">https://www.genecards.org/cgi-bin/carddisp.pl?gene=GNAI3</a>       |
| DEGS2    | Delta 4-Desaturase, Sphingolipid 2                  | Protein Coding | 38 | GC14M100143 | 6.781742 | <a href="https://www.genecards.org/cgi-bin/carddisp.pl?gene=DEGS2">https://www.genecards.org/cgi-bin/carddisp.pl?gene=DEGS2</a>       |
| SEMA5A   | Semaphorin 5A                                       | Protein Coding | 41 | GC05M009036 | 6.778819 | <a href="https://www.genecards.org/cgi-bin/carddisp.pl?gene=SEMA5A">https://www.genecards.org/cgi-bin/carddisp.pl?gene=SEMA5A</a>     |
| PITRM1   | Pitrilysin Metalloproteinase 1                      | Protein Coding | 40 | GC10M003138 | 6.769207 | <a href="https://www.genecards.org/cgi-bin/carddisp.pl?gene=PITRM1">https://www.genecards.org/cgi-bin/carddisp.pl?gene=PITRM1</a>     |
| HAS2     | Hyaluronan Synthase 2                               | Protein Coding | 42 | GC08M121594 | 6.768855 | <a href="https://www.genecards.org/cgi-bin/carddisp.pl?gene=HAS2">https://www.genecards.org/cgi-bin/carddisp.pl?gene=HAS2</a>         |
| ELAVL4   | ELAV Like RNA Binding Protein 4                     | Protein Coding | 40 | GC01P050025 | 6.762087 | <a href="https://www.genecards.org/cgi-bin/carddisp.pl?gene=ELAVL4">https://www.genecards.org/cgi-bin/carddisp.pl?gene=ELAVL4</a>     |
| NFIA     | Nuclear Factor I A                                  | Protein Coding | 45 | GC01P060865 | 6.761713 | <a href="https://www.genecards.org/cgi-bin/carddisp.pl?gene=NFIA">https://www.genecards.org/cgi-bin/carddisp.pl?gene=NFIA</a>         |
| SORCS3   | Sortilin Related VPS10 Domain Containing Receptor 3 | Protein Coding | 37 | GC10P104642 | 6.760242 | <a href="https://www.genecards.org/cgi-bin/carddisp.pl?gene=SORCS3">https://www.genecards.org/cgi-bin/carddisp.pl?gene=SORCS3</a>     |
| SECISBP2 | SECIS Binding Protein 2                             | Protein Coding | 43 | GC09P089318 | 6.754535 | <a href="https://www.genecards.org/cgi-bin/carddisp.pl?gene=SECISBP2">https://www.genecards.org/cgi-bin/carddisp.pl?gene=SECISBP2</a> |
| ZFAS1    | ZNF1 Antisense RNA 1                                | RNA Gene       | 19 | GC20P049276 | 6.752926 | <a href="https://www.genecards.org/cgi-bin/carddisp.pl?gene=ZFAS1">https://www.genecards.org/cgi-bin/carddisp.pl?gene=ZFAS1</a>       |
| YBX1     | Y-Box Binding Protein 1                             | Protein Coding | 40 | GC01P042682 | 6.752318 | <a href="https://www.genecards.org/cgi-bin/carddisp.pl?gene=YBX1">https://www.genecards.org/cgi-bin/carddisp.pl?gene=YBX1</a>         |
| RAB3IL1  | RAB3A Interacting Protein Like 1                    | Protein Coding | 38 | GC11M061897 | 6.750793 | <a href="https://www.genecards.org/cgi-bin/carddisp.pl?gene=RAB3IL1">https://www.genecards.org/cgi-bin/carddisp.pl?gene=RAB3IL1</a>   |
| EHMT2    | Euchromatic Histone Lysine Methyltransferase 2      | Protein Coding | 46 | GC06M031879 | 6.746386 | <a href="https://www.genecards.org/cgi-bin/carddisp.pl?gene=EHMT2">https://www.genecards.org/cgi-bin/carddisp.pl?gene=EHMT2</a>       |

|          |                                                                      |                |    |             |          |                                                                                                                                       |
|----------|----------------------------------------------------------------------|----------------|----|-------------|----------|---------------------------------------------------------------------------------------------------------------------------------------|
| BRAP     | BRCA1 Associated Protein                                             | Protein Coding | 42 | GC12M111642 | 6.735047 | <a href="https://www.genecards.org/cgi-bin/carddisp.pl?gene=BRAP">https://www.genecards.org/cgi-bin/carddisp.pl?gene=BRAP</a>         |
| VEGFD    | Vascular Endothelial Growth Factor D                                 | Protein Coding | 34 | GC0XM015345 | 6.731565 | <a href="https://www.genecards.org/cgi-bin/carddisp.pl?gene=VEGFD">https://www.genecards.org/cgi-bin/carddisp.pl?gene=VEGFD</a>       |
| TP53COR1 | Tumor Protein P53 Pathway Corepressor 1                              | RNA Gene       | 8  | GC06U903133 | 6.727714 | <a href="https://www.genecards.org/cgi-bin/carddisp.pl?gene=TP53COR1">https://www.genecards.org/cgi-bin/carddisp.pl?gene=TP53COR1</a> |
| CDK13    | Cyclin Dependent Kinase 13                                           | Protein Coding | 42 | GC07P040149 | 6.727438 | <a href="https://www.genecards.org/cgi-bin/carddisp.pl?gene=CDK13">https://www.genecards.org/cgi-bin/carddisp.pl?gene=CDK13</a>       |
| H4C3     | H4 Clustered Histone 3                                               | Protein Coding | 30 | GC06P054986 | 6.726777 | <a href="https://www.genecards.org/cgi-bin/carddisp.pl?gene=H4C3">https://www.genecards.org/cgi-bin/carddisp.pl?gene=H4C3</a>         |
| CARTPT   | CART Prepropeptide                                                   | Protein Coding | 44 | GC05P071719 | 6.725451 | <a href="https://www.genecards.org/cgi-bin/carddisp.pl?gene=CARTPT">https://www.genecards.org/cgi-bin/carddisp.pl?gene=CARTPT</a>     |
| HNF4G    | Hepatocyte Nuclear Factor 4 Gamma                                    | Protein Coding | 44 | GC08P075407 | 6.725281 | <a href="https://www.genecards.org/cgi-bin/carddisp.pl?gene=HNF4G">https://www.genecards.org/cgi-bin/carddisp.pl?gene=HNF4G</a>       |
| SLC25A37 | Solute Carrier Family 25 Member 37                                   | Protein Coding | 39 | GC08P023528 | 6.721336 | <a href="https://www.genecards.org/cgi-bin/carddisp.pl?gene=SLC25A37">https://www.genecards.org/cgi-bin/carddisp.pl?gene=SLC25A37</a> |
| CSNK2A2  | Casein Kinase 2 Alpha 2                                              | Protein Coding | 48 | GC16M058157 | 6.711905 | <a href="https://www.genecards.org/cgi-bin/carddisp.pl?gene=CSNK2A2">https://www.genecards.org/cgi-bin/carddisp.pl?gene=CSNK2A2</a>   |
| KIF23    | Kinesin Family Member 23                                             | Protein Coding | 44 | GC15P069414 | 6.71165  | <a href="https://www.genecards.org/cgi-bin/carddisp.pl?gene=KIF23">https://www.genecards.org/cgi-bin/carddisp.pl?gene=KIF23</a>       |
| MVD      | Mevalonate Diphosphate Decarboxylase                                 | Protein Coding | 46 | GC16M088651 | 6.707953 | <a href="https://www.genecards.org/cgi-bin/carddisp.pl?gene=MVD">https://www.genecards.org/cgi-bin/carddisp.pl?gene=MVD</a>           |
| CSNK1A1L | Casein Kinase 1 Alpha 1 Like                                         | Protein Coding | 37 | GC13M037103 | 6.701494 | <a href="https://www.genecards.org/cgi-bin/carddisp.pl?gene=CSNK1A1L">https://www.genecards.org/cgi-bin/carddisp.pl?gene=CSNK1A1L</a> |
| HES1     | Hes Family BHLH Transcription Factor 1                               | Protein Coding | 44 | GC03P194136 | 6.700509 | <a href="https://www.genecards.org/cgi-bin/carddisp.pl?gene=HES1">https://www.genecards.org/cgi-bin/carddisp.pl?gene=HES1</a>         |
| MARCKS   | Myristoylated Alanine Rich Protein Kinase C Substrate Translocase Of | Protein Coding | 40 | GC06P113857 | 6.700388 | <a href="https://www.genecards.org/cgi-bin/carddisp.pl?gene=MARCKS">https://www.genecards.org/cgi-bin/carddisp.pl?gene=MARCKS</a>     |
| TOMM20   | Outer Mitochondrial Membrane 20                                      | Protein Coding | 40 | GC01M235109 | 6.699883 | <a href="https://www.genecards.org/cgi-bin/carddisp.pl?gene=TOMM20">https://www.genecards.org/cgi-bin/carddisp.pl?gene=TOMM20</a>     |
| ARRB1    | Arrestin Beta 1                                                      | Protein Coding | 44 | GC11M075261 | 6.697263 | <a href="https://www.genecards.org/cgi-bin/carddisp.pl?gene=ARRB1">https://www.genecards.org/cgi-bin/carddisp.pl?gene=ARRB1</a>       |
| RHOD     | Ras Homolog Family Member D                                          | Protein Coding | 40 | GC11P067057 | 6.696239 | <a href="https://www.genecards.org/cgi-bin/carddisp.pl?gene=RHOD">https://www.genecards.org/cgi-bin/carddisp.pl?gene=RHOD</a>         |
| SESN2    | Sestrin 2                                                            | Protein Coding | 39 | GC01P028270 | 6.693996 | <a href="https://www.genecards.org/cgi-bin/carddisp.pl?gene=SESN2">https://www.genecards.org/cgi-bin/carddisp.pl?gene=SESN2</a>       |
| FBP2     | Fructose-Bisphosphatase 2                                            | Protein Coding | 44 | GC09M094558 | 6.69334  | <a href="https://www.genecards.org/cgi-bin/carddisp.pl?gene=FBP2">https://www.genecards.org/cgi-bin/carddisp.pl?gene=FBP2</a>         |
| H4C2     | H4 Clustered Histone 2                                               | Protein Coding | 31 | GC06M026026 | 6.685936 | <a href="https://www.genecards.org/cgi-bin/carddisp.pl?gene=H4C2">https://www.genecards.org/cgi-bin/carddisp.pl?gene=H4C2</a>         |

|          |                                                               |                |    |             |          |                                                                                                                                       |
|----------|---------------------------------------------------------------|----------------|----|-------------|----------|---------------------------------------------------------------------------------------------------------------------------------------|
| PHACTR1  | Phosphatase And Actin Regulator 1                             | Protein Coding | 38 | GC06P012717 | 6.685384 | <a href="https://www.genecards.org/cgi-bin/carddisp.pl?gene=PHACTR1">https://www.genecards.org/cgi-bin/carddisp.pl?gene=PHACTR1</a>   |
| CDC6     | Cell Division Cycle 6                                         | Protein Coding | 46 | GC17P040287 | 6.677649 | <a href="https://www.genecards.org/cgi-bin/carddisp.pl?gene=CDC6">https://www.genecards.org/cgi-bin/carddisp.pl?gene=CDC6</a>         |
| PTBP1    | Polypyrimidine Tract Binding Protein 1                        | Protein Coding | 43 | GC19P000797 | 6.677478 | <a href="https://www.genecards.org/cgi-bin/carddisp.pl?gene=PTBP1">https://www.genecards.org/cgi-bin/carddisp.pl?gene=PTBP1</a>       |
| TXNIP    | Thioredoxin Interacting Protein                               | Protein Coding | 38 | GC01M145992 | 6.677048 | <a href="https://www.genecards.org/cgi-bin/carddisp.pl?gene=TXNIP">https://www.genecards.org/cgi-bin/carddisp.pl?gene=TXNIP</a>       |
| PBX1     | PBX Homeobox 1                                                | Protein Coding | 50 | GC01P164524 | 6.676983 | <a href="https://www.genecards.org/cgi-bin/carddisp.pl?gene=PBX1">https://www.genecards.org/cgi-bin/carddisp.pl?gene=PBX1</a>         |
| CHEK1    | Checkpoint Kinase 1                                           | Protein Coding | 50 | GC11P125625 | 6.676565 | <a href="https://www.genecards.org/cgi-bin/carddisp.pl?gene=CHK1">https://www.genecards.org/cgi-bin/carddisp.pl?gene=CHK1</a>         |
| SEPTIN5  | Septin 5                                                      | Protein Coding | 32 | GC22P019714 | 6.67613  | <a href="https://www.genecards.org/cgi-bin/carddisp.pl?gene=SEPTIN5">https://www.genecards.org/cgi-bin/carddisp.pl?gene=SEPTIN5</a>   |
| RSPO1    | R-Spondin 1                                                   | Protein Coding | 44 | GC01M037612 | 6.67139  | <a href="https://www.genecards.org/cgi-bin/carddisp.pl?gene=RSPO1">https://www.genecards.org/cgi-bin/carddisp.pl?gene=RSPO1</a>       |
| DYRK1B   | Dual Specificity Tyrosine Phosphorylation Regulated Kinase 1B | Protein Coding | 47 | GC19M039825 | 6.666582 | <a href="https://www.genecards.org/cgi-bin/carddisp.pl?gene=DYRK1B">https://www.genecards.org/cgi-bin/carddisp.pl?gene=DYRK1B</a>     |
| NECTIN1  | Nectin Cell Adhesion Molecule 1                               | Protein Coding | 38 | GC11M119624 | 6.663525 | <a href="https://www.genecards.org/cgi-bin/carddisp.pl?gene=NECTIN1">https://www.genecards.org/cgi-bin/carddisp.pl?gene=NECTIN1</a>   |
| MIR103A2 | MicroRNA 103a-2                                               | RNA Gene       | 18 | GC20P003917 | 6.662079 | <a href="https://www.genecards.org/cgi-bin/carddisp.pl?gene=MIR103A2">https://www.genecards.org/cgi-bin/carddisp.pl?gene=MIR103A2</a> |
| SIPA1L2  | Signal Induced Proliferation Associated 1 Like 2              | Protein Coding | 38 | GC01M232397 | 6.658369 | <a href="https://www.genecards.org/cgi-bin/carddisp.pl?gene=SIPA1L2">https://www.genecards.org/cgi-bin/carddisp.pl?gene=SIPA1L2</a>   |
| CLDN3    | Claudin 3                                                     | Protein Coding | 41 | GC07M073768 | 6.655747 | <a href="https://www.genecards.org/cgi-bin/carddisp.pl?gene=CLDN3">https://www.genecards.org/cgi-bin/carddisp.pl?gene=CLDN3</a>       |
| MIR372   | MicroRNA 372                                                  | RNA Gene       | 16 | GC19P056407 | 6.654529 | <a href="https://www.genecards.org/cgi-bin/carddisp.pl?gene=MIR372">https://www.genecards.org/cgi-bin/carddisp.pl?gene=MIR372</a>     |
| SLC2A4RG | SLC2A4 Regulator                                              | Protein Coding | 37 | GC20P063739 | 6.652842 | <a href="https://www.genecards.org/cgi-bin/carddisp.pl?gene=SLC2A4RG">https://www.genecards.org/cgi-bin/carddisp.pl?gene=SLC2A4RG</a> |
| ADTRP    | Androgen Dependent TFPI Regulating Protein                    | Protein Coding | 29 | GC06M011712 | 6.650177 | <a href="https://www.genecards.org/cgi-bin/carddisp.pl?gene=ADTRP">https://www.genecards.org/cgi-bin/carddisp.pl?gene=ADTRP</a>       |
| PLAGL1   | PLAG1 Like Zinc Finger 1                                      | Protein Coding | 44 | GC06M143940 | 6.649423 | <a href="https://www.genecards.org/cgi-bin/carddisp.pl?gene=PLAGL1">https://www.genecards.org/cgi-bin/carddisp.pl?gene=PLAGL1</a>     |
| UGT2B28  | UDP Glucuronosyltransferase Family 2 Member B28               | Protein Coding | 40 | GC04P069280 | 6.649005 | <a href="https://www.genecards.org/cgi-bin/carddisp.pl?gene=UGT2B28">https://www.genecards.org/cgi-bin/carddisp.pl?gene=UGT2B28</a>   |
| VEGFB    | Vascular Endothelial Growth Factor B                          | Protein Coding | 45 | GC11P064234 | 6.646336 | <a href="https://www.genecards.org/cgi-bin/carddisp.pl?gene=VEGFB">https://www.genecards.org/cgi-bin/carddisp.pl?gene=VEGFB</a>       |

|          |                                                       |                |    |             |          |                                                                                                                                       |
|----------|-------------------------------------------------------|----------------|----|-------------|----------|---------------------------------------------------------------------------------------------------------------------------------------|
| PNLIPRP2 | Pancreatic Lipase Related Protein 2 (Gene/Pseudogene) | Protein Coding | 37 | GC10P116620 | 6.646216 | <a href="https://www.genecards.org/cgi-bin/carddisp.pl?gene=PNLIPRP2">https://www.genecards.org/cgi-bin/carddisp.pl?gene=PNLIPRP2</a> |
| SDC2     | Syndecan 2                                            | Protein Coding | 45 | GC08P096495 | 6.644638 | <a href="https://www.genecards.org/cgi-bin/carddisp.pl?gene=SDC2">https://www.genecards.org/cgi-bin/carddisp.pl?gene=SDC2</a>         |
| SFN      | Stratifin                                             | Protein Coding | 47 | GC01P026904 | 6.642867 | <a href="https://www.genecards.org/cgi-bin/carddisp.pl?gene=SFN">https://www.genecards.org/cgi-bin/carddisp.pl?gene=SFN</a>           |
| PDPK1    | 3-Phosphoinositide Dependent Protein Kinase 1         | Protein Coding | 50 | GC16P002537 | 6.630094 | <a href="https://www.genecards.org/cgi-bin/carddisp.pl?gene=PDPK1">https://www.genecards.org/cgi-bin/carddisp.pl?gene=PDPK1</a>       |
| PYCARD   | PYD And CARD Domain Containing                        | Protein Coding | 43 | GC16M031201 | 6.626009 | <a href="https://www.genecards.org/cgi-bin/carddisp.pl?gene=PYCARD">https://www.genecards.org/cgi-bin/carddisp.pl?gene=PYCARD</a>     |
| UFC1     | Ubiquitin-Fold Modifier Conjugating Enzyme 1          | Protein Coding | 38 | GC01P161177 | 6.619278 | <a href="https://www.genecards.org/cgi-bin/carddisp.pl?gene=UFC1">https://www.genecards.org/cgi-bin/carddisp.pl?gene=UFC1</a>         |
| CDKAL1   | CDK5 Regulatory Subunit Associated Protein 1 Like 1   | Protein Coding | 40 | GC06P020534 | 6.618275 | <a href="https://www.genecards.org/cgi-bin/carddisp.pl?gene=CDKAL1">https://www.genecards.org/cgi-bin/carddisp.pl?gene=CDKAL1</a>     |
| INTS2    | Integrator Complex Subunit 2                          | Protein Coding | 35 | GC17M061865 | 6.614825 | <a href="https://www.genecards.org/cgi-bin/carddisp.pl?gene=INTS2">https://www.genecards.org/cgi-bin/carddisp.pl?gene=INTS2</a>       |
| PARD3    | Par-3 Family Cell Polarity Regulator                  | Protein Coding | 43 | GC10M034110 | 6.608632 | <a href="https://www.genecards.org/cgi-bin/carddisp.pl?gene=PARD3">https://www.genecards.org/cgi-bin/carddisp.pl?gene=PARD3</a>       |
| CEP135   | Centrosomal Protein 135                               | Protein Coding | 39 | GC04P055948 | 6.60545  | <a href="https://www.genecards.org/cgi-bin/carddisp.pl?gene=CEP135">https://www.genecards.org/cgi-bin/carddisp.pl?gene=CEP135</a>     |
| DCK      | Deoxycytidine Kinase                                  | Protein Coding | 45 | GC04P070992 | 6.604548 | <a href="https://www.genecards.org/cgi-bin/carddisp.pl?gene=DCK">https://www.genecards.org/cgi-bin/carddisp.pl?gene=DCK</a>           |
| ASPH     | Aspartate Beta-Hydroxylase                            | Protein Coding | 43 | GC08M061500 | 6.598381 | <a href="https://www.genecards.org/cgi-bin/carddisp.pl?gene=ASPH">https://www.genecards.org/cgi-bin/carddisp.pl?gene=ASPH</a>         |
| LPXN     | Leupaxin                                              | Protein Coding | 41 | GC11M069097 | 6.595394 | <a href="https://www.genecards.org/cgi-bin/carddisp.pl?gene=LPXN">https://www.genecards.org/cgi-bin/carddisp.pl?gene=LPXN</a>         |
| PSMC1    | Proteasome 26S Subunit, ATPase 1                      | Protein Coding | 43 | GC14P090256 | 6.595159 | <a href="https://www.genecards.org/cgi-bin/carddisp.pl?gene=PSMC1">https://www.genecards.org/cgi-bin/carddisp.pl?gene=PSMC1</a>       |
| RNF146   | Ring Finger Protein 146                               | Protein Coding | 37 | GC06P127266 | 6.594392 | <a href="https://www.genecards.org/cgi-bin/carddisp.pl?gene=RNF146">https://www.genecards.org/cgi-bin/carddisp.pl?gene=RNF146</a>     |
| DHPS     | Deoxyhypusine Synthase                                | Protein Coding | 43 | GC19M013051 | 6.587067 | <a href="https://www.genecards.org/cgi-bin/carddisp.pl?gene=DHPS">https://www.genecards.org/cgi-bin/carddisp.pl?gene=DHPS</a>         |
| SARS1    | Seryl-TRNA Synthetase 1                               | Protein Coding | 36 | GC01P109214 | 6.586814 | <a href="https://www.genecards.org/cgi-bin/carddisp.pl?gene=SARS1">https://www.genecards.org/cgi-bin/carddisp.pl?gene=SARS1</a>       |
| LMOD3    | Leiomodin 3                                           | Protein Coding | 39 | GC03M069156 | 6.586119 | <a href="https://www.genecards.org/cgi-bin/carddisp.pl?gene=LMOD3">https://www.genecards.org/cgi-bin/carddisp.pl?gene=LMOD3</a>       |
| VAMP1    | Vesicle Associated Membrane Protein 1                 | Protein Coding | 46 | GC12M006462 | 6.585022 | <a href="https://www.genecards.org/cgi-bin/carddisp.pl?gene=VAMP1">https://www.genecards.org/cgi-bin/carddisp.pl?gene=VAMP1</a>       |

|           |                                               |                |    |             |          |                                                                                                                                         |
|-----------|-----------------------------------------------|----------------|----|-------------|----------|-----------------------------------------------------------------------------------------------------------------------------------------|
| CRNDE     | Colorectal Neoplasia Differentially Expressed | RNA Gene       | 20 | GC16M054845 | 6.58463  | <a href="https://www.genecards.org/cgi-bin/carddisp.pl?gene=CRNDE">https://www.genecards.org/cgi-bin/carddisp.pl?gene=CRNDE</a>         |
| TBXA2R    | Thromboxane A2 Receptor                       | Protein Coding | 49 | GC19M003594 | 6.579034 | <a href="https://www.genecards.org/cgi-bin/carddisp.pl?gene=TBXA2R">https://www.genecards.org/cgi-bin/carddisp.pl?gene=TBXA2R</a>       |
| HOXA11-AS | HOXA11 Antisense RNA                          | RNA Gene       | 20 | GC07P027184 | 6.57717  | <a href="https://www.genecards.org/cgi-bin/carddisp.pl?gene=HOXA11-AS">https://www.genecards.org/cgi-bin/carddisp.pl?gene=HOXA11-AS</a> |
| MIR661    | MicroRNA 661                                  | RNA Gene       | 18 | GC08M143945 | 6.575136 | <a href="https://www.genecards.org/cgi-bin/carddisp.pl?gene=MIR661">https://www.genecards.org/cgi-bin/carddisp.pl?gene=MIR661</a>       |
| SPRY4     | Sprouty RTK Signaling Antagonist 4            | Protein Coding | 45 | GC05M142310 | 6.573835 | <a href="https://www.genecards.org/cgi-bin/carddisp.pl?gene=SPRY4">https://www.genecards.org/cgi-bin/carddisp.pl?gene=SPRY4</a>         |
| SAA2      | Serum Amyloid A2                              | Protein Coding | 36 | GC11M018238 | 6.571986 | <a href="https://www.genecards.org/cgi-bin/carddisp.pl?gene=SAA2">https://www.genecards.org/cgi-bin/carddisp.pl?gene=SAA2</a>           |
| ANXA6     | Annexin A6                                    | Protein Coding | 43 | GC05M151100 | 6.569563 | <a href="https://www.genecards.org/cgi-bin/carddisp.pl?gene=ANXA6">https://www.genecards.org/cgi-bin/carddisp.pl?gene=ANXA6</a>         |
| SLC25A10  | Solute Carrier Family 25 Member 10            | Protein Coding | 43 | GC17P081712 | 6.568927 | <a href="https://www.genecards.org/cgi-bin/carddisp.pl?gene=SLC25A10">https://www.genecards.org/cgi-bin/carddisp.pl?gene=SLC25A10</a>   |
| PCSK2     | Proprotein Convertase Subtilisin/Kexin Type 2 | Protein Coding | 41 | GC20P017226 | 6.566692 | <a href="https://www.genecards.org/cgi-bin/carddisp.pl?gene=PCSK2">https://www.genecards.org/cgi-bin/carddisp.pl?gene=PCSK2</a>         |
| TIMELESS  | Timeless Circadian Regulator                  | Protein Coding | 39 | GC12M056416 | 6.565112 | <a href="https://www.genecards.org/cgi-bin/carddisp.pl?gene=TIMELESS">https://www.genecards.org/cgi-bin/carddisp.pl?gene=TIMELESS</a>   |
| ARID4A    | AT-Rich Interaction Domain 4A                 | Protein Coding | 38 | GC14P058298 | 6.563344 | <a href="https://www.genecards.org/cgi-bin/carddisp.pl?gene=ARID4A">https://www.genecards.org/cgi-bin/carddisp.pl?gene=ARID4A</a>       |
| CNTN2     | Contactin 2                                   | Protein Coding | 46 | GC01P205043 | 6.560995 | <a href="https://www.genecards.org/cgi-bin/carddisp.pl?gene=CNTN2">https://www.genecards.org/cgi-bin/carddisp.pl?gene=CNTN2</a>         |
| ATF3      | Activating Transcription Factor 3             | Protein Coding | 45 | GC01P212565 | 6.560956 | <a href="https://www.genecards.org/cgi-bin/carddisp.pl?gene=ATF3">https://www.genecards.org/cgi-bin/carddisp.pl?gene=ATF3</a>           |
| TNFRSF9   | TNF Receptor Superfamily Member 9             | Protein Coding | 45 | GC01M007915 | 6.560941 | <a href="https://www.genecards.org/cgi-bin/carddisp.pl?gene=TNFRSF9">https://www.genecards.org/cgi-bin/carddisp.pl?gene=TNFRSF9</a>     |
| ARCN1     | Archain 1                                     | Protein Coding | 42 | GC11P118572 | 6.557966 | <a href="https://www.genecards.org/cgi-bin/carddisp.pl?gene=ARCN1">https://www.genecards.org/cgi-bin/carddisp.pl?gene=ARCN1</a>         |
| SLC7A2    | Solute Carrier Family 7 Member 2              | Protein Coding | 43 | GC08P017497 | 6.557402 | <a href="https://www.genecards.org/cgi-bin/carddisp.pl?gene=SLC7A2">https://www.genecards.org/cgi-bin/carddisp.pl?gene=SLC7A2</a>       |
| PLA2G2E   | Phospholipase A2 Group IIE Transformation     | Protein Coding | 39 | GC01M019920 | 6.548486 | <a href="https://www.genecards.org/cgi-bin/carddisp.pl?gene=PLA2G2E">https://www.genecards.org/cgi-bin/carddisp.pl?gene=PLA2G2E</a>     |
| TRRAP     | /Transcription Domain Associated Protein      | Protein Coding | 46 | GC07P098877 | 6.5484   | <a href="https://www.genecards.org/cgi-bin/carddisp.pl?gene=TRRAP">https://www.genecards.org/cgi-bin/carddisp.pl?gene=TRRAP</a>         |
| KDM6B     | Lysine Demethylase 6B                         | Protein Coding | 44 | GC17P007834 | 6.542434 | <a href="https://www.genecards.org/cgi-bin/carddisp.pl?gene=KDM6B">https://www.genecards.org/cgi-bin/carddisp.pl?gene=KDM6B</a>         |
| PKP1      | Plakophilin 1                                 | Protein Coding | 42 | GC01P201283 | 6.539439 | <a href="https://www.genecards.org/cgi-bin/carddisp.pl?gene=PKP1">https://www.genecards.org/cgi-bin/carddisp.pl?gene=PKP1</a>           |

|         |                                                          |                |    |             |          |                                                                                                                                     |
|---------|----------------------------------------------------------|----------------|----|-------------|----------|-------------------------------------------------------------------------------------------------------------------------------------|
| FGF5    | Fibroblast Growth Factor 5                               | Protein Coding | 45 | GC04P080266 | 6.534393 | <a href="https://www.genecards.org/cgi-bin/carddisp.pl?gene=FGF5">https://www.genecards.org/cgi-bin/carddisp.pl?gene=FGF5</a>       |
| LAMA4   | Laminin Subunit Alpha 4                                  | Protein Coding | 45 | GC06M112107 | 6.533856 | <a href="https://www.genecards.org/cgi-bin/carddisp.pl?gene=LAMA4">https://www.genecards.org/cgi-bin/carddisp.pl?gene=LAMA4</a>     |
| KAT2B   | Lysine Acetyltransferase 2B                              | Protein Coding | 48 | GC03P020043 | 6.530809 | <a href="https://www.genecards.org/cgi-bin/carddisp.pl?gene=KAT2B">https://www.genecards.org/cgi-bin/carddisp.pl?gene=KAT2B</a>     |
| RMC1    | Regulator Of MON1-CCZ1                                   | Protein Coding | 25 | GC18P023504 | 6.528017 | <a href="https://www.genecards.org/cgi-bin/carddisp.pl?gene=RMC1">https://www.genecards.org/cgi-bin/carddisp.pl?gene=RMC1</a>       |
| NUP188  | Nucleoporin 188                                          | Protein Coding | 37 | GC09P128947 | 6.526526 | <a href="https://www.genecards.org/cgi-bin/carddisp.pl?gene=NUP188">https://www.genecards.org/cgi-bin/carddisp.pl?gene=NUP188</a>   |
| ADAMTS9 | ADAM Metallopeptidase With Thrombospondin Type 1 Motif 9 | Protein Coding | 38 | GC03M064501 | 6.520804 | <a href="https://www.genecards.org/cgi-bin/carddisp.pl?gene=ADAMTS9">https://www.genecards.org/cgi-bin/carddisp.pl?gene=ADAMTS9</a> |
| CCAT2   | Colon Cancer Associated Transcript 2                     | RNA Gene       | 13 | GC08P127400 | 6.512988 | <a href="https://www.genecards.org/cgi-bin/carddisp.pl?gene=CCAT2">https://www.genecards.org/cgi-bin/carddisp.pl?gene=CCAT2</a>     |
| OXTR    | Oxytocin Receptor                                        | Protein Coding | 47 | GC03M008767 | 6.510406 | <a href="https://www.genecards.org/cgi-bin/carddisp.pl?gene=OXTR">https://www.genecards.org/cgi-bin/carddisp.pl?gene=OXTR</a>       |
| SLC1A4  | Solute Carrier Family 1 Member 4                         | Protein Coding | 45 | GC02P064988 | 6.50598  | <a href="https://www.genecards.org/cgi-bin/carddisp.pl?gene=SLC1A4">https://www.genecards.org/cgi-bin/carddisp.pl?gene=SLC1A4</a>   |
| PAK1    | P21 (RAC1) Activated Kinase 1                            | Protein Coding | 49 | GC11M077321 | 6.505352 | <a href="https://www.genecards.org/cgi-bin/carddisp.pl?gene=PAK1">https://www.genecards.org/cgi-bin/carddisp.pl?gene=PAK1</a>       |
| GGT2    | Gamma-Glutamyltransferase 2                              | Protein Coding | 31 | GC22M021207 | 6.501858 | <a href="https://www.genecards.org/cgi-bin/carddisp.pl?gene=GGT2">https://www.genecards.org/cgi-bin/carddisp.pl?gene=GGT2</a>       |
| ENPEP   | Glutamyl Aminopeptidase                                  | Protein Coding | 45 | GC04P110365 | 6.499918 | <a href="https://www.genecards.org/cgi-bin/carddisp.pl?gene=ENPEP">https://www.genecards.org/cgi-bin/carddisp.pl?gene=ENPEP</a>     |
| BCL2A1  | BCL2 Related Protein A1                                  | Protein Coding | 41 | GC15M079961 | 6.490554 | <a href="https://www.genecards.org/cgi-bin/carddisp.pl?gene=BCL2A1">https://www.genecards.org/cgi-bin/carddisp.pl?gene=BCL2A1</a>   |
| PPL     | Periplakin                                               | Protein Coding | 41 | GC16M004872 | 6.489831 | <a href="https://www.genecards.org/cgi-bin/carddisp.pl?gene=PPL">https://www.genecards.org/cgi-bin/carddisp.pl?gene=PPL</a>         |
| RDH10   | Retinol Dehydrogenase 10                                 | Protein Coding | 40 | GC08P073294 | 6.48808  | <a href="https://www.genecards.org/cgi-bin/carddisp.pl?gene=RDH10">https://www.genecards.org/cgi-bin/carddisp.pl?gene=RDH10</a>     |
| SNHG20  | Small Nucleolar RNA Host Gene 20                         | RNA Gene       | 17 | GC17P077087 | 6.486632 | <a href="https://www.genecards.org/cgi-bin/carddisp.pl?gene=SNHG20">https://www.genecards.org/cgi-bin/carddisp.pl?gene=SNHG20</a>   |
| DARS1   | Aspartyl-TRNA Synthetase 1                               | Protein Coding | 37 | GC02M135905 | 6.485133 | <a href="https://www.genecards.org/cgi-bin/carddisp.pl?gene=DARS1">https://www.genecards.org/cgi-bin/carddisp.pl?gene=DARS1</a>     |
| RPTOR   | Regulatory Associated Protein Of MTOR Complex 1          | Protein Coding | 44 | GC17P080544 | 6.483601 | <a href="https://www.genecards.org/cgi-bin/carddisp.pl?gene=RPTOR">https://www.genecards.org/cgi-bin/carddisp.pl?gene=RPTOR</a>     |
| THBS4   | Thrombospondin 4                                         | Protein Coding | 44 | GC05P079991 | 6.47765  | <a href="https://www.genecards.org/cgi-bin/carddisp.pl?gene=THBS4">https://www.genecards.org/cgi-bin/carddisp.pl?gene=THBS4</a>     |



|         |                                                         |                |    |             |          |                                                                                                                                     |
|---------|---------------------------------------------------------|----------------|----|-------------|----------|-------------------------------------------------------------------------------------------------------------------------------------|
| FAM126A | Family With Sequence Similarity 126 Member A            | Protein Coding | 37 | GC07M022889 | 6.476423 | <a href="https://www.genecards.org/cgi-bin/carddisp.pl?gene=FAM126A">https://www.genecards.org/cgi-bin/carddisp.pl?gene=FAM126A</a> |
| ATP5F1C | ATP Synthase F1 Subunit Gamma                           | Protein Coding | 33 | GC10P007789 | 6.472447 | <a href="https://www.genecards.org/cgi-bin/carddisp.pl?gene=ATP5F1C">https://www.genecards.org/cgi-bin/carddisp.pl?gene=ATP5F1C</a> |
| NELFA   | Negative Elongation Factor Complex Member A             | Protein Coding | 37 | GC04M001985 | 6.46648  | <a href="https://www.genecards.org/cgi-bin/carddisp.pl?gene=NELFA">https://www.genecards.org/cgi-bin/carddisp.pl?gene=NELFA</a>     |
| RBFOX3  | RNA Binding Fox-1 Homolog 3 Protein                     | Protein Coding | 36 | GC17M079089 | 6.465144 | <a href="https://www.genecards.org/cgi-bin/carddisp.pl?gene=RBFOX3">https://www.genecards.org/cgi-bin/carddisp.pl?gene=RBFOX3</a>   |
| PPP1R3B | Phosphatase 1 Regulatory Subunit 3B                     | Protein Coding | 37 | GC08M009136 | 6.460268 | <a href="https://www.genecards.org/cgi-bin/carddisp.pl?gene=PPP1R3B">https://www.genecards.org/cgi-bin/carddisp.pl?gene=PPP1R3B</a> |
| NTNG1   | Netrin G1                                               | Protein Coding | 41 | GC01P107140 | 6.458458 | <a href="https://www.genecards.org/cgi-bin/carddisp.pl?gene=NTNG1">https://www.genecards.org/cgi-bin/carddisp.pl?gene=NTNG1</a>     |
| TSEN2   | TRNA Splicing Endonuclease Subunit 2                    | Protein Coding | 41 | GC03P012484 | 6.457306 | <a href="https://www.genecards.org/cgi-bin/carddisp.pl?gene=TSEN2">https://www.genecards.org/cgi-bin/carddisp.pl?gene=TSEN2</a>     |
| ZHX2    | Zinc Fingers And Homeoboxes 2 Calcium/Calmodulin        | Protein Coding | 39 | GC08P122781 | 6.454482 | <a href="https://www.genecards.org/cgi-bin/carddisp.pl?gene=ZHX2">https://www.genecards.org/cgi-bin/carddisp.pl?gene=ZHX2</a>       |
| CAMK4   | Dependent Protein Kinase IV                             | Protein Coding | 47 | GC05P111223 | 6.452702 | <a href="https://www.genecards.org/cgi-bin/carddisp.pl?gene=CAMK4">https://www.genecards.org/cgi-bin/carddisp.pl?gene=CAMK4</a>     |
| GJC1    | Gap Junction Protein Gamma 1                            | Protein Coding | 43 | GC17M044800 | 6.452277 | <a href="https://www.genecards.org/cgi-bin/carddisp.pl?gene=GJC1">https://www.genecards.org/cgi-bin/carddisp.pl?gene=GJC1</a>       |
| AOPEP   | Aminopeptidase O (Putative) Phosphatidylinositol Glycan | Protein Coding | 31 | GC09P094728 | 6.451938 | <a href="https://www.genecards.org/cgi-bin/carddisp.pl?gene=AOPEP">https://www.genecards.org/cgi-bin/carddisp.pl?gene=AOPEP</a>     |
| PIGN    | Anchor Biosynthesis Class N                             | Protein Coding | 41 | GC18M061905 | 6.449343 | <a href="https://www.genecards.org/cgi-bin/carddisp.pl?gene=PIGN">https://www.genecards.org/cgi-bin/carddisp.pl?gene=PIGN</a>       |
| RBP2    | Retinol Binding Protein 2                               | Protein Coding | 39 | GC03M139452 | 6.445167 | <a href="https://www.genecards.org/cgi-bin/carddisp.pl?gene=RBP2">https://www.genecards.org/cgi-bin/carddisp.pl?gene=RBP2</a>       |
| MLST8   | MTOR Associated Protein, LST8 Homolog                   | Protein Coding | 43 | GC16P002204 | 6.442444 | <a href="https://www.genecards.org/cgi-bin/carddisp.pl?gene=MLST8">https://www.genecards.org/cgi-bin/carddisp.pl?gene=MLST8</a>     |
| UBE2D1  | Ubiquitin Conjugating Enzyme E2 D1                      | Protein Coding | 46 | GC10P058334 | 6.441568 | <a href="https://www.genecards.org/cgi-bin/carddisp.pl?gene=UBE2D1">https://www.genecards.org/cgi-bin/carddisp.pl?gene=UBE2D1</a>   |
| PDZK1   | PDZ Domain Containing 1                                 | Protein Coding | 42 | GC01M145670 | 6.441489 | <a href="https://www.genecards.org/cgi-bin/carddisp.pl?gene=PDZK1">https://www.genecards.org/cgi-bin/carddisp.pl?gene=PDZK1</a>     |
| TPD52   | Tumor Protein D52                                       | Protein Coding | 42 | GC08M079920 | 6.439872 | <a href="https://www.genecards.org/cgi-bin/carddisp.pl?gene=TPD52">https://www.genecards.org/cgi-bin/carddisp.pl?gene=TPD52</a>     |
| DPH1    | Diphthamide Biosynthesis 1                              | Protein Coding | 41 | GC17P002030 | 6.437938 | <a href="https://www.genecards.org/cgi-bin/carddisp.pl?gene=DPH1">https://www.genecards.org/cgi-bin/carddisp.pl?gene=DPH1</a>       |

|          |                                                      |                |    |             |          |                                                                                                                                       |
|----------|------------------------------------------------------|----------------|----|-------------|----------|---------------------------------------------------------------------------------------------------------------------------------------|
| XYLB     | Xylulokinase                                         | Protein Coding | 40 | GC03P038363 | 6.437343 | <a href="https://www.genecards.org/cgi-bin/carddisp.pl?gene=XYLB">https://www.genecards.org/cgi-bin/carddisp.pl?gene=XYLB</a>         |
| DAB2     | DAB Adaptor Protein 2                                | Protein Coding | 44 | GC05M039371 | 6.435457 | <a href="https://www.genecards.org/cgi-bin/carddisp.pl?gene=DAB2">https://www.genecards.org/cgi-bin/carddisp.pl?gene=DAB2</a>         |
| BAIAP2L1 | BAR/IMD Domain Containing Adaptor Protein 2 Like 1   | Protein Coding | 40 | GC07M098294 | 6.43115  | <a href="https://www.genecards.org/cgi-bin/carddisp.pl?gene=BAIAP2L1">https://www.genecards.org/cgi-bin/carddisp.pl?gene=BAIAP2L1</a> |
| CYP2F1   | Cytochrome P450 Family 2 Subfamily F Member 1        | Protein Coding | 43 | GC19P041114 | 6.4306   | <a href="https://www.genecards.org/cgi-bin/carddisp.pl?gene=CYP2F1">https://www.genecards.org/cgi-bin/carddisp.pl?gene=CYP2F1</a>     |
| ZMIZ1    | Zinc Finger MIZ-Type Containing 1                    | Protein Coding | 41 | GC10P079068 | 6.430305 | <a href="https://www.genecards.org/cgi-bin/carddisp.pl?gene=ZMIZ1">https://www.genecards.org/cgi-bin/carddisp.pl?gene=ZMIZ1</a>       |
| MPC1     | Mitochondrial Pyruvate Carrier 1                     | Protein Coding | 43 | GC06M166364 | 6.426732 | <a href="https://www.genecards.org/cgi-bin/carddisp.pl?gene=MPC1">https://www.genecards.org/cgi-bin/carddisp.pl?gene=MPC1</a>         |
| TPM4     | Tropomyosin 4                                        | Protein Coding | 41 | GC19P026610 | 6.424023 | <a href="https://www.genecards.org/cgi-bin/carddisp.pl?gene=TPM4">https://www.genecards.org/cgi-bin/carddisp.pl?gene=TPM4</a>         |
| RBM10    | RNA Binding Motif Protein 10                         | Protein Coding | 41 | GC0XP047206 | 6.420727 | <a href="https://www.genecards.org/cgi-bin/carddisp.pl?gene=RBM10">https://www.genecards.org/cgi-bin/carddisp.pl?gene=RBM10</a>       |
| KDM5B    | Lysine Demethylase 5B                                | Protein Coding | 44 | GC01M202696 | 6.419094 | <a href="https://www.genecards.org/cgi-bin/carddisp.pl?gene=KDM5B">https://www.genecards.org/cgi-bin/carddisp.pl?gene=KDM5B</a>       |
| PTN      | Pleiotrophin                                         | Protein Coding | 43 | GC07M137227 | 6.416771 | <a href="https://www.genecards.org/cgi-bin/carddisp.pl?gene=PTN">https://www.genecards.org/cgi-bin/carddisp.pl?gene=PTN</a>           |
| IQGAP2   | IQ Motif Containing GTPase Activating Protein 2 ST14 | Protein Coding | 43 | GC05P076403 | 6.412855 | <a href="https://www.genecards.org/cgi-bin/carddisp.pl?gene=IQGAP2">https://www.genecards.org/cgi-bin/carddisp.pl?gene=IQGAP2</a>     |
| ST14     | Transmembrane Serine Protease Matriptase Serine And  | Protein Coding | 47 | GC11P130159 | 6.41197  | <a href="https://www.genecards.org/cgi-bin/carddisp.pl?gene=ST14">https://www.genecards.org/cgi-bin/carddisp.pl?gene=ST14</a>         |
| SRSF6    | Arginine Rich Splicing Factor 6                      | Protein Coding | 40 | GC20P043457 | 6.410023 | <a href="https://www.genecards.org/cgi-bin/carddisp.pl?gene=SRSF6">https://www.genecards.org/cgi-bin/carddisp.pl?gene=SRSF6</a>       |
| FAP      | Fibroblast Activation Protein Alpha                  | Protein Coding | 43 | GC02M162170 | 6.409836 | <a href="https://www.genecards.org/cgi-bin/carddisp.pl?gene=FAP">https://www.genecards.org/cgi-bin/carddisp.pl?gene=FAP</a>           |
| P3H2     | Prolyl 3-Hydroxylase 2 SHANK                         | Protein Coding | 37 | GC03M189956 | 6.409812 | <a href="https://www.genecards.org/cgi-bin/carddisp.pl?gene=P3H2">https://www.genecards.org/cgi-bin/carddisp.pl?gene=P3H2</a>         |
| SHARPIN  | Associated RH Domain Interactor                      | Protein Coding | 41 | GC08M144098 | 6.40668  | <a href="https://www.genecards.org/cgi-bin/carddisp.pl?gene=SHARPIN">https://www.genecards.org/cgi-bin/carddisp.pl?gene=SHARPIN</a>   |
| H4C11    | H4 Clustered Histone 11                              | Protein Coding | 30 | GC06P055048 | 6.40627  | <a href="https://www.genecards.org/cgi-bin/carddisp.pl?gene=H4C11">https://www.genecards.org/cgi-bin/carddisp.pl?gene=H4C11</a>       |

|         |                                                                     |                   |    |                 |          |                                                                                                                                     |
|---------|---------------------------------------------------------------------|-------------------|----|-----------------|----------|-------------------------------------------------------------------------------------------------------------------------------------|
| FRAS1   | Fraser<br>Extracellular<br>Matrix Complex<br>Subunit 1              | Protein<br>Coding | 38 | GC04P0780<br>56 | 6.403532 | <a href="https://www.genecards.org/cgi-bin/carddisp.pl?gene=FRAS1">https://www.genecards.org/cgi-bin/carddisp.pl?gene=FRAS1</a>     |
| SLC7A5  | Solute Carrier<br>Family 7<br>Member 5                              | Protein<br>Coding | 45 | GC16M087<br>830 | 6.400654 | <a href="https://www.genecards.org/cgi-bin/carddisp.pl?gene=SLC7A5">https://www.genecards.org/cgi-bin/carddisp.pl?gene=SLC7A5</a>   |
| H4C8    | H4 Clustered<br>Histone 8                                           | Protein<br>Coding | 30 | GC06M047<br>225 | 6.39635  | <a href="https://www.genecards.org/cgi-bin/carddisp.pl?gene=H4C8">https://www.genecards.org/cgi-bin/carddisp.pl?gene=H4C8</a>       |
| TET1    | Tet<br>Methylcytosine<br>Dioxygenase 1                              | Protein<br>Coding | 38 | GC10P0685<br>60 | 6.394946 | <a href="https://www.genecards.org/cgi-bin/carddisp.pl?gene=TET1">https://www.genecards.org/cgi-bin/carddisp.pl?gene=TET1</a>       |
| NDRG2   | NDRG Family<br>Member 2                                             | Protein<br>Coding | 39 | GC14M021<br>016 | 6.393259 | <a href="https://www.genecards.org/cgi-bin/carddisp.pl?gene=NDRG2">https://www.genecards.org/cgi-bin/carddisp.pl?gene=NDRG2</a>     |
| SLC31A1 | Solute Carrier<br>Family 31<br>Member 1                             | Protein<br>Coding | 43 | GC09P1132<br>21 | 6.392159 | <a href="https://www.genecards.org/cgi-bin/carddisp.pl?gene=SLC31A1">https://www.genecards.org/cgi-bin/carddisp.pl?gene=SLC31A1</a> |
| LAMP3   | Lysosomal<br>Associated<br>Membrane<br>Protein 3                    | Protein<br>Coding | 40 | GC03M183<br>122 | 6.389036 | <a href="https://www.genecards.org/cgi-bin/carddisp.pl?gene=LAMP3">https://www.genecards.org/cgi-bin/carddisp.pl?gene=LAMP3</a>     |
| FITM2   | Fat Storage<br>Inducing<br>Transmembran<br>e Protein 2              | Protein<br>Coding | 36 | GC20M044<br>302 | 6.386168 | <a href="https://www.genecards.org/cgi-bin/carddisp.pl?gene=FITM2">https://www.genecards.org/cgi-bin/carddisp.pl?gene=FITM2</a>     |
| RING1   | Ring Finger<br>Protein 1                                            | Protein<br>Coding | 42 | GC06P0332<br>08 | 6.384512 | <a href="https://www.genecards.org/cgi-bin/carddisp.pl?gene=RING1">https://www.genecards.org/cgi-bin/carddisp.pl?gene=RING1</a>     |
| H4C4    | H4 Clustered<br>Histone 4                                           | Protein<br>Coding | 27 | GC06M047<br>223 | 6.377773 | <a href="https://www.genecards.org/cgi-bin/carddisp.pl?gene=H4C4">https://www.genecards.org/cgi-bin/carddisp.pl?gene=H4C4</a>       |
| SIRT2   | Sirtuin 2                                                           | Protein<br>Coding | 48 | GC19M038<br>878 | 6.374105 | <a href="https://www.genecards.org/cgi-bin/carddisp.pl?gene=SIRT2">https://www.genecards.org/cgi-bin/carddisp.pl?gene=SIRT2</a>     |
| UBE4B   | Ubiquitination<br>Factor E4B                                        | Protein<br>Coding | 41 | GC01P0100<br>32 | 6.374067 | <a href="https://www.genecards.org/cgi-bin/carddisp.pl?gene=UBE4B">https://www.genecards.org/cgi-bin/carddisp.pl?gene=UBE4B</a>     |
| SNHG15  | Small Nucleolar<br>RNA Host Gene<br>15                              | RNA<br>Gene       | 19 | GC07M044<br>983 | 6.373295 | <a href="https://www.genecards.org/cgi-bin/carddisp.pl?gene=SNHG15">https://www.genecards.org/cgi-bin/carddisp.pl?gene=SNHG15</a>   |
| NAA40   | N-Alpha-<br>Acetyltransfera<br>se 40, NatD<br>Catalytic<br>Subunit  | Protein<br>Coding | 34 | GC11P0639<br>38 | 6.372422 | <a href="https://www.genecards.org/cgi-bin/carddisp.pl?gene=NAA40">https://www.genecards.org/cgi-bin/carddisp.pl?gene=NAA40</a>     |
| STIL    | STIL Centriolar<br>Assembly<br>Protein                              | Protein<br>Coding | 42 | GC01M047<br>250 | 6.37236  | <a href="https://www.genecards.org/cgi-bin/carddisp.pl?gene=STIL">https://www.genecards.org/cgi-bin/carddisp.pl?gene=STIL</a>       |
| MIR134  | MicroRNA 134                                                        | RNA<br>Gene       | 19 | GC14P1063<br>02 | 6.368529 | <a href="https://www.genecards.org/cgi-bin/carddisp.pl?gene=MIR134">https://www.genecards.org/cgi-bin/carddisp.pl?gene=MIR134</a>   |
| SOCS2   | Suppressor Of<br>Cytokine<br>Signaling 2                            | Protein<br>Coding | 45 | GC12P0935<br>69 | 6.367354 | <a href="https://www.genecards.org/cgi-bin/carddisp.pl?gene=SOCS2">https://www.genecards.org/cgi-bin/carddisp.pl?gene=SOCS2</a>     |
| IKBKE   | Inhibitor Of<br>Nuclear Factor<br>Kappa B Kinase<br>Subunit Epsilon | Protein<br>Coding | 46 | GC01P2064<br>70 | 6.35701  | <a href="https://www.genecards.org/cgi-bin/carddisp.pl?gene=IKBKE">https://www.genecards.org/cgi-bin/carddisp.pl?gene=IKBKE</a>     |

|          |                                                   |                |    |             |          |                                                                                                                                       |
|----------|---------------------------------------------------|----------------|----|-------------|----------|---------------------------------------------------------------------------------------------------------------------------------------|
| PPP3R1   | Protein Phosphatase 3 Regulatory Subunit B, Alpha | Protein Coding | 46 | GC02M068143 | 6.345759 | <a href="https://www.genecards.org/cgi-bin/carddisp.pl?gene=PPP3R1">https://www.genecards.org/cgi-bin/carddisp.pl?gene=PPP3R1</a>     |
| FMN1     | Formin 1                                          | Protein Coding | 39 | GC15M032765 | 6.339075 | <a href="https://www.genecards.org/cgi-bin/carddisp.pl?gene=FMN1">https://www.genecards.org/cgi-bin/carddisp.pl?gene=FMN1</a>         |
| FPR2     | Formyl Peptide Receptor 2                         | Protein Coding | 47 | GC19P051752 | 6.339007 | <a href="https://www.genecards.org/cgi-bin/carddisp.pl?gene=FPR2">https://www.genecards.org/cgi-bin/carddisp.pl?gene=FPR2</a>         |
| KISS1R   | KISS1 Receptor                                    | Protein Coding | 45 | GC19P000917 | 6.336868 | <a href="https://www.genecards.org/cgi-bin/carddisp.pl?gene=KISS1R">https://www.genecards.org/cgi-bin/carddisp.pl?gene=KISS1R</a>     |
| GPR84    | G Protein-Coupled Receptor 84                     | Protein Coding | 40 | GC12M054362 | 6.334286 | <a href="https://www.genecards.org/cgi-bin/carddisp.pl?gene=GPR84">https://www.genecards.org/cgi-bin/carddisp.pl?gene=GPR84</a>       |
| CXCL16   | C-X-C Motif Chemokine Ligand 16                   | Protein Coding | 40 | GC17M004733 | 6.331749 | <a href="https://www.genecards.org/cgi-bin/carddisp.pl?gene=CXCL16">https://www.genecards.org/cgi-bin/carddisp.pl?gene=CXCL16</a>     |
| SFPQ     | Splicing Factor Proline And Glutamine Rich        | Protein Coding | 44 | GC01M035176 | 6.326203 | <a href="https://www.genecards.org/cgi-bin/carddisp.pl?gene=SFPQ">https://www.genecards.org/cgi-bin/carddisp.pl?gene=SFPQ</a>         |
| APLNR    | Apelin Receptor                                   | Protein Coding | 44 | GC11M057233 | 6.323127 | <a href="https://www.genecards.org/cgi-bin/carddisp.pl?gene=APLNR">https://www.genecards.org/cgi-bin/carddisp.pl?gene=APLNR</a>       |
| FBXO11   | F-Box Protein 11                                  | Protein Coding | 43 | GC02M047789 | 6.320556 | <a href="https://www.genecards.org/cgi-bin/carddisp.pl?gene=FBXO11">https://www.genecards.org/cgi-bin/carddisp.pl?gene=FBXO11</a>     |
| PTENP1   | Phosphatase And Tensin Homolog Pseudogene 1 Major | Pseudogene     | 20 | GC09M033673 | 6.317821 | <a href="https://www.genecards.org/cgi-bin/carddisp.pl?gene=PTENP1">https://www.genecards.org/cgi-bin/carddisp.pl?gene=PTENP1</a>     |
| HLA-DOA  | Histocompatibility Complex, Class II, DO Alpha    | Protein Coding | 41 | GC06M033004 | 6.314027 | <a href="https://www.genecards.org/cgi-bin/carddisp.pl?gene=HLA-DOA">https://www.genecards.org/cgi-bin/carddisp.pl?gene=HLA-DOA</a>   |
| MVP      | Major Vault Protein                               | Protein Coding | 41 | GC16P032377 | 6.313807 | <a href="https://www.genecards.org/cgi-bin/carddisp.pl?gene=MVP">https://www.genecards.org/cgi-bin/carddisp.pl?gene=MVP</a>           |
| ESRRA    | Estrogen Related Receptor Alpha                   | Protein Coding | 48 | GC11P064305 | 6.30768  | <a href="https://www.genecards.org/cgi-bin/carddisp.pl?gene=ESRRA">https://www.genecards.org/cgi-bin/carddisp.pl?gene=ESRRA</a>       |
| DAB1     | DAB Adaptor Protein 1                             | Protein Coding | 44 | GC01M056994 | 6.304649 | <a href="https://www.genecards.org/cgi-bin/carddisp.pl?gene=DAB1">https://www.genecards.org/cgi-bin/carddisp.pl?gene=DAB1</a>         |
| AP2B1    | Adaptor Related Protein Complex 2 Subunit Beta 1  | Protein Coding | 43 | GC17P035578 | 6.303818 | <a href="https://www.genecards.org/cgi-bin/carddisp.pl?gene=AP2B1">https://www.genecards.org/cgi-bin/carddisp.pl?gene=AP2B1</a>       |
| MIR124-2 | MicroRNA 124-2                                    | RNA Gene       | 19 | GC08P064379 | 6.303351 | <a href="https://www.genecards.org/cgi-bin/carddisp.pl?gene=MIR124-2">https://www.genecards.org/cgi-bin/carddisp.pl?gene=MIR124-2</a> |
| TOP2B    | DNA Topoisomerase II Beta                         | Protein Coding | 47 | GC03M025598 | 6.302116 | <a href="https://www.genecards.org/cgi-bin/carddisp.pl?gene=TOP2B">https://www.genecards.org/cgi-bin/carddisp.pl?gene=TOP2B</a>       |
| POU2F1   | POU Class 2 Homeobox 1                            | Protein Coding | 45 | GC01P167190 | 6.300186 | <a href="https://www.genecards.org/cgi-bin/carddisp.pl?gene=POU2F1">https://www.genecards.org/cgi-bin/carddisp.pl?gene=POU2F1</a>     |
| RPS18    | Ribosomal Protein S18                             | Protein Coding | 41 | GC06P055262 | 6.299579 | <a href="https://www.genecards.org/cgi-bin/carddisp.pl?gene=RPS18">https://www.genecards.org/cgi-bin/carddisp.pl?gene=RPS18</a>       |

|        |                                                                             |                |    |             |          |                                                                                                                                   |
|--------|-----------------------------------------------------------------------------|----------------|----|-------------|----------|-----------------------------------------------------------------------------------------------------------------------------------|
| RARG   | Retinoic Acid Receptor Gamma                                                | Protein Coding | 48 | GC12M053210 | 6.294356 | <a href="https://www.genecards.org/cgi-bin/carddisp.pl?gene=RARG">https://www.genecards.org/cgi-bin/carddisp.pl?gene=RARG</a>     |
| CASC2  | Cancer Susceptibility 2                                                     | RNA Gene       | 24 | GC10P118046 | 6.291429 | <a href="https://www.genecards.org/cgi-bin/carddisp.pl?gene=CASC2">https://www.genecards.org/cgi-bin/carddisp.pl?gene=CASC2</a>   |
| GP1B   | G Protein-Coupled Estrogen Receptor 1                                       | Protein Coding | 38 | GC07P001368 | 6.287693 | <a href="https://www.genecards.org/cgi-bin/carddisp.pl?gene=GP1B">https://www.genecards.org/cgi-bin/carddisp.pl?gene=GP1B</a>     |
| CCL19  | C-C Motif Chemokine Ligand 19                                               | Protein Coding | 42 | GC09M034692 | 6.28407  | <a href="https://www.genecards.org/cgi-bin/carddisp.pl?gene=CCL19">https://www.genecards.org/cgi-bin/carddisp.pl?gene=CCL19</a>   |
| EMG1   | EMG1 N1-Specific Pseudouridine Methyltransferase                            | Protein Coding | 41 | GC12P006970 | 6.281708 | <a href="https://www.genecards.org/cgi-bin/carddisp.pl?gene=EMG1">https://www.genecards.org/cgi-bin/carddisp.pl?gene=EMG1</a>     |
| MAP2K7 | Mitogen-Activated Protein Kinase Kinase 7                                   | Protein Coding | 47 | GC19P007903 | 6.277817 | <a href="https://www.genecards.org/cgi-bin/carddisp.pl?gene=MAP2K7">https://www.genecards.org/cgi-bin/carddisp.pl?gene=MAP2K7</a> |
| YWHAB  | Tyrosine 3-Monooxygenase/Tryptophan 5-Monooxygenase Activation Protein Beta | Protein Coding | 49 | GC20P044885 | 6.274555 | <a href="https://www.genecards.org/cgi-bin/carddisp.pl?gene=YWHAB">https://www.genecards.org/cgi-bin/carddisp.pl?gene=YWHAB</a>   |
| LTBR   | Leukotriene B4 Receptor                                                     | Protein Coding | 45 | GC14P024311 | 6.272876 | <a href="https://www.genecards.org/cgi-bin/carddisp.pl?gene=LTBR">https://www.genecards.org/cgi-bin/carddisp.pl?gene=LTBR</a>     |
| EIF6   | Eukaryotic Translation Initiation Factor 6                                  | Protein Coding | 41 | GC20M035278 | 6.272304 | <a href="https://www.genecards.org/cgi-bin/carddisp.pl?gene=EIF6">https://www.genecards.org/cgi-bin/carddisp.pl?gene=EIF6</a>     |
| MCM2   | Minichromosome Maintenance Complex Component 2                              | Protein Coding | 48 | GC03P127598 | 6.268583 | <a href="https://www.genecards.org/cgi-bin/carddisp.pl?gene=MCM2">https://www.genecards.org/cgi-bin/carddisp.pl?gene=MCM2</a>     |
| ABCC11 | ATP Binding Cassette Subfamily C Member 11                                  | Protein Coding | 43 | GC16M048166 | 6.26734  | <a href="https://www.genecards.org/cgi-bin/carddisp.pl?gene=ABCC11">https://www.genecards.org/cgi-bin/carddisp.pl?gene=ABCC11</a> |
| ATXN2L | Ataxin 2 Like                                                               | Protein Coding | 38 | GC16P032257 | 6.266768 | <a href="https://www.genecards.org/cgi-bin/carddisp.pl?gene=ATXN2L">https://www.genecards.org/cgi-bin/carddisp.pl?gene=ATXN2L</a> |
| RHOB   | Ras Homolog Family Member B                                                 | Protein Coding | 44 | GC02P020447 | 6.265263 | <a href="https://www.genecards.org/cgi-bin/carddisp.pl?gene=RHOB">https://www.genecards.org/cgi-bin/carddisp.pl?gene=RHOB</a>     |
| ABHD6  | Abhydrolase Domain Containing 6, Acylglycerol Lipase                        | Protein Coding | 39 | GC03P058238 | 6.265128 | <a href="https://www.genecards.org/cgi-bin/carddisp.pl?gene=ABHD6">https://www.genecards.org/cgi-bin/carddisp.pl?gene=ABHD6</a>   |
| MDC1   | Mediator Of DNA Damage Checkpoint 1                                         | Protein Coding | 41 | GC06M046797 | 6.262409 | <a href="https://www.genecards.org/cgi-bin/carddisp.pl?gene=MDC1">https://www.genecards.org/cgi-bin/carddisp.pl?gene=MDC1</a>     |

|          |                                                                        |                   |    |                 |          |                                                                                                                                       |
|----------|------------------------------------------------------------------------|-------------------|----|-----------------|----------|---------------------------------------------------------------------------------------------------------------------------------------|
| PTTG1    | PTTG1<br>Regulator Of<br>Sister<br>Chromatid<br>Separation,<br>Securin | Protein<br>Coding | 44 | GC05P1604<br>22 | 6.259799 | <a href="https://www.genecards.org/cgi-bin/carddisp.pl?gene=PTTG1">https://www.genecards.org/cgi-bin/carddisp.pl?gene=PTTG1</a>       |
| TEC      | Tec Protein<br>Tyrosine Kinase                                         | Protein<br>Coding | 46 | GC04M048<br>137 | 6.247668 | <a href="https://www.genecards.org/cgi-bin/carddisp.pl?gene=TEC">https://www.genecards.org/cgi-bin/carddisp.pl?gene=TEC</a>           |
| NTN1     | Netrin 1                                                               | Protein<br>Coding | 45 | GC17P0090<br>21 | 6.244952 | <a href="https://www.genecards.org/cgi-bin/carddisp.pl?gene=NTN1">https://www.genecards.org/cgi-bin/carddisp.pl?gene=NTN1</a>         |
| POLR2L   | RNA<br>Polymerase II, I<br>And III Subunit<br>L                        | Protein<br>Coding | 41 | GC11M001<br>144 | 6.234688 | <a href="https://www.genecards.org/cgi-bin/carddisp.pl?gene=POLR2L">https://www.genecards.org/cgi-bin/carddisp.pl?gene=POLR2L</a>     |
| FLVCR2   | FLVCR Heme<br>Transporter 2                                            | Protein<br>Coding | 42 | GC14P0755<br>78 | 6.234234 | <a href="https://www.genecards.org/cgi-bin/carddisp.pl?gene=FLVCR2">https://www.genecards.org/cgi-bin/carddisp.pl?gene=FLVCR2</a>     |
| ARG2     | Arginase 2                                                             | Protein<br>Coding | 46 | GC14P0676<br>19 | 6.23372  | <a href="https://www.genecards.org/cgi-bin/carddisp.pl?gene=ARG2">https://www.genecards.org/cgi-bin/carddisp.pl?gene=ARG2</a>         |
| VDAC3    | Voltage<br>Dependent<br>Anion Channel<br>3                             | Protein<br>Coding | 44 | GC08P0423<br>92 | 6.233534 | <a href="https://www.genecards.org/cgi-bin/carddisp.pl?gene=VDAC3">https://www.genecards.org/cgi-bin/carddisp.pl?gene=VDAC3</a>       |
| SLC25A28 | Solute Carrier<br>Family 25<br>Member 28                               | Protein<br>Coding | 38 | GC10M099<br>610 | 6.23326  | <a href="https://www.genecards.org/cgi-bin/carddisp.pl?gene=SLC25A28">https://www.genecards.org/cgi-bin/carddisp.pl?gene=SLC25A28</a> |
| MED1     | Mediator<br>Complex<br>Subunit 1                                       | Protein<br>Coding | 42 | GC17M039<br>404 | 6.227978 | <a href="https://www.genecards.org/cgi-bin/carddisp.pl?gene=MED1">https://www.genecards.org/cgi-bin/carddisp.pl?gene=MED1</a>         |
| NUDT6    | Nudix<br>Hydrolase 6                                                   | Protein<br>Coding | 38 | GC04M122<br>888 | 6.227676 | <a href="https://www.genecards.org/cgi-bin/carddisp.pl?gene=NUDT6">https://www.genecards.org/cgi-bin/carddisp.pl?gene=NUDT6</a>       |
| H4C9     | H4 Clustered<br>Histone 9                                              | Protein<br>Coding | 30 | GC06P0555<br>92 | 6.225471 | <a href="https://www.genecards.org/cgi-bin/carddisp.pl?gene=H4C9">https://www.genecards.org/cgi-bin/carddisp.pl?gene=H4C9</a>         |
| TPPP3    | Tubulin<br>Polymerization<br>Promoting<br>Protein Family<br>Member 3   | Protein<br>Coding | 38 | GC16M067<br>389 | 6.223899 | <a href="https://www.genecards.org/cgi-bin/carddisp.pl?gene=TPPP3">https://www.genecards.org/cgi-bin/carddisp.pl?gene=TPPP3</a>       |
| G3BP1    | G3BP Stress<br>Granule<br>Assembly<br>Factor 1                         | Protein<br>Coding | 41 | GC05P1517<br>71 | 6.222131 | <a href="https://www.genecards.org/cgi-bin/carddisp.pl?gene=G3BP1">https://www.genecards.org/cgi-bin/carddisp.pl?gene=G3BP1</a>       |
| BCL3     | BCL3<br>Transcription<br>Coactivator                                   | Protein<br>Coding | 41 | GC19P0447<br>47 | 6.218973 | <a href="https://www.genecards.org/cgi-bin/carddisp.pl?gene=BCL3">https://www.genecards.org/cgi-bin/carddisp.pl?gene=BCL3</a>         |
| MIR33B   | MicroRNA 33b                                                           | RNA<br>Gene       | 18 | GC17M017<br>813 | 6.212285 | <a href="https://www.genecards.org/cgi-bin/carddisp.pl?gene=MIR33B">https://www.genecards.org/cgi-bin/carddisp.pl?gene=MIR33B</a>     |
| PSMD3    | Proteasome<br>26S Subunit,<br>Non-ATPase 3                             | Protein<br>Coding | 43 | GC17P0399<br>80 | 6.210496 | <a href="https://www.genecards.org/cgi-bin/carddisp.pl?gene=PSMD3">https://www.genecards.org/cgi-bin/carddisp.pl?gene=PSMD3</a>       |
| HAO2     | Hydroxyacid<br>Oxidase 2                                               | Protein<br>Coding | 38 | GC01P1193<br>68 | 6.205287 | <a href="https://www.genecards.org/cgi-bin/carddisp.pl?gene=HAO2">https://www.genecards.org/cgi-bin/carddisp.pl?gene=HAO2</a>         |
| NUDC     | Nuclear<br>Distribution C,<br>Dynein<br>Complex<br>Regulator           | Protein<br>Coding | 43 | GC01P0269<br>25 | 6.203939 | <a href="https://www.genecards.org/cgi-bin/carddisp.pl?gene=NUDC">https://www.genecards.org/cgi-bin/carddisp.pl?gene=NUDC</a>         |

|              |                                                                                    |                   |    |             |          |                                                                                                                                               |
|--------------|------------------------------------------------------------------------------------|-------------------|----|-------------|----------|-----------------------------------------------------------------------------------------------------------------------------------------------|
| PLCB3        | Phospholipase C Beta 3 CRK Like                                                    | Protein Coding    | 49 | GC11P064251 | 6.202496 | <a href="https://www.genecards.org/cgi-bin/carddisp.pl?gene=PLCB3">https://www.genecards.org/cgi-bin/carddisp.pl?gene=PLCB3</a>               |
| CRKL         | Proto-Oncogene, Adaptor Protein                                                    | Protein Coding    | 47 | GC22P020917 | 6.201339 | <a href="https://www.genecards.org/cgi-bin/carddisp.pl?gene=CRKL">https://www.genecards.org/cgi-bin/carddisp.pl?gene=CRKL</a>                 |
| TRIB3        | Tribbles Pseudokinase 3                                                            | Protein Coding    | 44 | GC20P000361 | 6.200017 | <a href="https://www.genecards.org/cgi-bin/carddisp.pl?gene=TRIB3">https://www.genecards.org/cgi-bin/carddisp.pl?gene=TRIB3</a>               |
| S1PR1        | Sphingosine-1-Phosphate Receptor 1                                                 | Protein Coding    | 45 | GC01P101236 | 6.194642 | <a href="https://www.genecards.org/cgi-bin/carddisp.pl?gene=S1PR1">https://www.genecards.org/cgi-bin/carddisp.pl?gene=S1PR1</a>               |
| LOC107548112 | REN Promoter And Enhancer Region                                                   | Biological Region | 2  | GC01P204162 | 6.193439 | <a href="https://www.genecards.org/cgi-bin/carddisp.pl?gene=LOC107548112">https://www.genecards.org/cgi-bin/carddisp.pl?gene=LOC107548112</a> |
| FLOT2        | Flotillin 2                                                                        | Protein Coding    | 42 | GC17M031085 | 6.1912   | <a href="https://www.genecards.org/cgi-bin/carddisp.pl?gene=FLOT2">https://www.genecards.org/cgi-bin/carddisp.pl?gene=FLOT2</a>               |
| GLRA2        | Glycine Receptor Alpha 2                                                           | Protein Coding    | 45 | GC0XP014529 | 6.188403 | <a href="https://www.genecards.org/cgi-bin/carddisp.pl?gene=GLRA2">https://www.genecards.org/cgi-bin/carddisp.pl?gene=GLRA2</a>               |
| ATIC         | 5-Aminoimidazole-4-Carboxamide Ribonucleotide Formyltransferase/IMP Cyclohydrolase | Protein Coding    | 47 | GC02P215311 | 6.184664 | <a href="https://www.genecards.org/cgi-bin/carddisp.pl?gene=ATIC">https://www.genecards.org/cgi-bin/carddisp.pl?gene=ATIC</a>                 |
| SLC38A8      | Solute Carrier Family 38 Member 8                                                  | Protein Coding    | 37 | GC16M084009 | 6.182121 | <a href="https://www.genecards.org/cgi-bin/carddisp.pl?gene=SLC38A8">https://www.genecards.org/cgi-bin/carddisp.pl?gene=SLC38A8</a>           |
| CTHRC1       | Collagen Triple Helix Repeat Containing 1                                          | Protein Coding    | 41 | GC08P103371 | 6.182034 | <a href="https://www.genecards.org/cgi-bin/carddisp.pl?gene=CTHRC1">https://www.genecards.org/cgi-bin/carddisp.pl?gene=CTHRC1</a>             |
| MACF1        | Actin Crosslinking Factor 1                                                        | Protein Coding    | 41 | GC01P039082 | 6.179041 | <a href="https://www.genecards.org/cgi-bin/carddisp.pl?gene=MACF1">https://www.genecards.org/cgi-bin/carddisp.pl?gene=MACF1</a>               |
| MAML2        | Mastermind Like Transcriptional Coactivator 2                                      | Protein Coding    | 38 | GC11M095976 | 6.160441 | <a href="https://www.genecards.org/cgi-bin/carddisp.pl?gene=MAML2">https://www.genecards.org/cgi-bin/carddisp.pl?gene=MAML2</a>               |
| SLC25A27     | Solute Carrier Family 25 Member 27                                                 | Protein Coding    | 39 | GC06P046652 | 6.158172 | <a href="https://www.genecards.org/cgi-bin/carddisp.pl?gene=SLC25A27">https://www.genecards.org/cgi-bin/carddisp.pl?gene=SLC25A27</a>         |
| COPB2        | COPI Coat Complex Subunit Beta 2                                                   | Protein Coding    | 45 | GC03M139355 | 6.154596 | <a href="https://www.genecards.org/cgi-bin/carddisp.pl?gene=COPB2">https://www.genecards.org/cgi-bin/carddisp.pl?gene=COPB2</a>               |
| PIGV         | Phosphatidylinositol Glycan Anchor Biosynthesis Class V                            | Protein Coding    | 43 | GC01P026787 | 6.149278 | <a href="https://www.genecards.org/cgi-bin/carddisp.pl?gene=PIGV">https://www.genecards.org/cgi-bin/carddisp.pl?gene=PIGV</a>                 |
| RPL7A        | Ribosomal Protein L7a                                                              | Protein Coding    | 43 | GC09P133348 | 6.145533 | <a href="https://www.genecards.org/cgi-bin/carddisp.pl?gene=RPL7A">https://www.genecards.org/cgi-bin/carddisp.pl?gene=RPL7A</a>               |
| YEATS2       | YEATS Domain Containing 2                                                          | Protein Coding    | 37 | GC03P183698 | 6.14296  | <a href="https://www.genecards.org/cgi-bin/carddisp.pl?gene=YEATS2">https://www.genecards.org/cgi-bin/carddisp.pl?gene=YEATS2</a>             |

|         |                                                        |                |    |             |          |                                                                                                                                     |
|---------|--------------------------------------------------------|----------------|----|-------------|----------|-------------------------------------------------------------------------------------------------------------------------------------|
| ZFP57   | ZFP57 Zinc Finger Protein                              | Protein Coding | 40 | GC06M029672 | 6.140587 | <a href="https://www.genecards.org/cgi-bin/carddisp.pl?gene=ZFP57">https://www.genecards.org/cgi-bin/carddisp.pl?gene=ZFP57</a>     |
| PDGFC   | Platelet Derived Growth Factor C                       | Protein Coding | 44 | GC04M156760 | 6.137277 | <a href="https://www.genecards.org/cgi-bin/carddisp.pl?gene=PDGFC">https://www.genecards.org/cgi-bin/carddisp.pl?gene=PDGFC</a>     |
| KLF5    | Kruppel Like Factor 5                                  | Protein Coding | 45 | GC13P073054 | 6.136822 | <a href="https://www.genecards.org/cgi-bin/carddisp.pl?gene=KLF5">https://www.genecards.org/cgi-bin/carddisp.pl?gene=KLF5</a>       |
| KERA    | Keratocan                                              | Protein Coding | 42 | GC12M091050 | 6.135474 | <a href="https://www.genecards.org/cgi-bin/carddisp.pl?gene=KERA">https://www.genecards.org/cgi-bin/carddisp.pl?gene=KERA</a>       |
| CTRL    | Chymotrypsin Like CRK Proto-Oncogene,                  | Protein Coding | 40 | GC16M067927 | 6.135232 | <a href="https://www.genecards.org/cgi-bin/carddisp.pl?gene=CTRL">https://www.genecards.org/cgi-bin/carddisp.pl?gene=CTRL</a>       |
| CRK     | Adaptor Protein                                        | Protein Coding | 46 | GC17M001420 | 6.130989 | <a href="https://www.genecards.org/cgi-bin/carddisp.pl?gene=CRK">https://www.genecards.org/cgi-bin/carddisp.pl?gene=CRK</a>         |
| H4C13   | H4 Clustered Histone 13                                | Protein Coding | 29 | GC06M047221 | 6.130874 | <a href="https://www.genecards.org/cgi-bin/carddisp.pl?gene=H4C13">https://www.genecards.org/cgi-bin/carddisp.pl?gene=H4C13</a>     |
| ROCK1   | Rho Associated Coiled-Coil Containing Protein Kinase 1 | Protein Coding | 51 | GC18M020946 | 6.129965 | <a href="https://www.genecards.org/cgi-bin/carddisp.pl?gene=ROCK1">https://www.genecards.org/cgi-bin/carddisp.pl?gene=ROCK1</a>     |
| H4C6    | H4 Clustered Histone 6                                 | Protein Coding | 29 | GC06P055591 | 6.127167 | <a href="https://www.genecards.org/cgi-bin/carddisp.pl?gene=H4C6">https://www.genecards.org/cgi-bin/carddisp.pl?gene=H4C6</a>       |
| HKDC1   | Hexokinase Domain Containing 1                         | Protein Coding | 41 | GC10P069220 | 6.124722 | <a href="https://www.genecards.org/cgi-bin/carddisp.pl?gene=HKDC1">https://www.genecards.org/cgi-bin/carddisp.pl?gene=HKDC1</a>     |
| CENPE   | Centromere Protein E                                   | Protein Coding | 45 | GC04M103105 | 6.124363 | <a href="https://www.genecards.org/cgi-bin/carddisp.pl?gene=CENPE">https://www.genecards.org/cgi-bin/carddisp.pl?gene=CENPE</a>     |
| CERK    | Ceramide Kinase                                        | Protein Coding | 43 | GC22M046684 | 6.123432 | <a href="https://www.genecards.org/cgi-bin/carddisp.pl?gene=CERK">https://www.genecards.org/cgi-bin/carddisp.pl?gene=CERK</a>       |
| GCSH    | Glycine Cleavage System Protein H                      | Protein Coding | 44 | GC16M081081 | 6.122847 | <a href="https://www.genecards.org/cgi-bin/carddisp.pl?gene=GCSH">https://www.genecards.org/cgi-bin/carddisp.pl?gene=GCSH</a>       |
| MIR520C | MicroRNA 520c                                          | RNA Gene       | 18 | GC19P056391 | 6.120534 | <a href="https://www.genecards.org/cgi-bin/carddisp.pl?gene=MIR520C">https://www.genecards.org/cgi-bin/carddisp.pl?gene=MIR520C</a> |
| H4C14   | H4 Clustered Histone 14                                | Protein Coding | 29 | GC01P149832 | 6.118846 | <a href="https://www.genecards.org/cgi-bin/carddisp.pl?gene=H4C14">https://www.genecards.org/cgi-bin/carddisp.pl?gene=H4C14</a>     |
| H4C15   | H4 Clustered Histone 15                                | Protein Coding | 27 | GC01M150133 | 6.118846 | <a href="https://www.genecards.org/cgi-bin/carddisp.pl?gene=H4C15">https://www.genecards.org/cgi-bin/carddisp.pl?gene=H4C15</a>     |
| USP7    | Ubiquitin Specific Peptidase 7                         | Protein Coding | 49 | GC16M008892 | 6.116426 | <a href="https://www.genecards.org/cgi-bin/carddisp.pl?gene=USP7">https://www.genecards.org/cgi-bin/carddisp.pl?gene=USP7</a>       |
| H4C12   | H4 Clustered Histone 12                                | Protein Coding | 29 | GC06M047220 | 6.115572 | <a href="https://www.genecards.org/cgi-bin/carddisp.pl?gene=H4C12">https://www.genecards.org/cgi-bin/carddisp.pl?gene=H4C12</a>     |
| PANDAR  | Promoter Of CDKN1A Antisense DNA Damage Activated RNA  | RNA Gene       | 12 | GC06M036673 | 6.11512  | <a href="https://www.genecards.org/cgi-bin/carddisp.pl?gene=PANDAR">https://www.genecards.org/cgi-bin/carddisp.pl?gene=PANDAR</a>   |
| NDUFS5  | NADH:Ubiquinone Oxidoreductase Subunit S5              | Protein Coding | 41 | GC01P039026 | 6.11116  | <a href="https://www.genecards.org/cgi-bin/carddisp.pl?gene=NDUFS5">https://www.genecards.org/cgi-bin/carddisp.pl?gene=NDUFS5</a>   |



|          |                                                     |                |    |             |          |                                                                                                                                       |
|----------|-----------------------------------------------------|----------------|----|-------------|----------|---------------------------------------------------------------------------------------------------------------------------------------|
| ST3GAL4  | ST3 Beta-Galactoside Alpha-2,3-Sialyltransferase 4  | Protein Coding | 43 | GC11P126355 | 6.109054 | <a href="https://www.genecards.org/cgi-bin/carddisp.pl?gene=ST3GAL4">https://www.genecards.org/cgi-bin/carddisp.pl?gene=ST3GAL4</a>   |
| SERPINE2 | Serpin Family E Member 2<br>Notum,                  | Protein Coding | 42 | GC02M223975 | 6.106835 | <a href="https://www.genecards.org/cgi-bin/carddisp.pl?gene=SERPINE2">https://www.genecards.org/cgi-bin/carddisp.pl?gene=SERPINE2</a> |
| NOTUM    | Palmitoleoyl-Protein Carboxylesterase               | Protein Coding | 36 | GC17M081952 | 6.104705 | <a href="https://www.genecards.org/cgi-bin/carddisp.pl?gene=NOTUM">https://www.genecards.org/cgi-bin/carddisp.pl?gene=NOTUM</a>       |
| H4C5     | H4 Clustered Histone 5<br>HOXD                      | Protein Coding | 28 | GC06P055590 | 6.102196 | <a href="https://www.genecards.org/cgi-bin/carddisp.pl?gene=H4C5">https://www.genecards.org/cgi-bin/carddisp.pl?gene=H4C5</a>         |
| HAGLR    | Antisense Growth-Associated Long Non-Coding RNA     | RNA Gene       | 16 | GC02M176173 | 6.101118 | <a href="https://www.genecards.org/cgi-bin/carddisp.pl?gene=HAGLR">https://www.genecards.org/cgi-bin/carddisp.pl?gene=HAGLR</a>       |
| STK4     | Serine/Threonine Kinase 4<br>Proprotein             | Protein Coding | 50 | GC20P044966 | 6.097652 | <a href="https://www.genecards.org/cgi-bin/carddisp.pl?gene=STK4">https://www.genecards.org/cgi-bin/carddisp.pl?gene=STK4</a>         |
| PCSK5    | Convertase Subtilisin/Kexin Type 5                  | Protein Coding | 41 | GC09P075890 | 6.091687 | <a href="https://www.genecards.org/cgi-bin/carddisp.pl?gene=PCSK5">https://www.genecards.org/cgi-bin/carddisp.pl?gene=PCSK5</a>       |
| FPR1     | Formyl Peptide Receptor 1<br>SH3 Domain             | Protein Coding | 48 | GC19M051745 | 6.088187 | <a href="https://www.genecards.org/cgi-bin/carddisp.pl?gene=FPR1">https://www.genecards.org/cgi-bin/carddisp.pl?gene=FPR1</a>         |
| SH3GL1   | Containing GRB2 Like 1, Endophilin A2               | Protein Coding | 44 | GC19M004360 | 6.081384 | <a href="https://www.genecards.org/cgi-bin/carddisp.pl?gene=SH3GL1">https://www.genecards.org/cgi-bin/carddisp.pl?gene=SH3GL1</a>     |
| LCP1     | Lymphocyte Cytosolic Protein 1                      | Protein Coding | 43 | GC13M046132 | 6.080808 | <a href="https://www.genecards.org/cgi-bin/carddisp.pl?gene=LCP1">https://www.genecards.org/cgi-bin/carddisp.pl?gene=LCP1</a>         |
| TUBB4B   | Tubulin Beta 4B Class IVb                           | Protein Coding | 45 | GC09P137241 | 6.08025  | <a href="https://www.genecards.org/cgi-bin/carddisp.pl?gene=TUBB4B">https://www.genecards.org/cgi-bin/carddisp.pl?gene=TUBB4B</a>     |
| IRS4     | Insulin Receptor Substrate 4                        | Protein Coding | 40 | GC0XM108720 | 6.077898 | <a href="https://www.genecards.org/cgi-bin/carddisp.pl?gene=IRS4">https://www.genecards.org/cgi-bin/carddisp.pl?gene=IRS4</a>         |
| AQP7     | Aquaporin 7                                         | Protein Coding | 45 | GC09M033384 | 6.076461 | <a href="https://www.genecards.org/cgi-bin/carddisp.pl?gene=AQP7">https://www.genecards.org/cgi-bin/carddisp.pl?gene=AQP7</a>         |
| STMN1    | Stathmin 1                                          | Protein Coding | 44 | GC01M025884 | 6.072724 | <a href="https://www.genecards.org/cgi-bin/carddisp.pl?gene=STMN1">https://www.genecards.org/cgi-bin/carddisp.pl?gene=STMN1</a>       |
| ALDH3B1  | Aldehyde Dehydrogenase 3 Family Member B1           | Protein Coding | 43 | GC11P068027 | 6.072433 | <a href="https://www.genecards.org/cgi-bin/carddisp.pl?gene=ALDH3B1">https://www.genecards.org/cgi-bin/carddisp.pl?gene=ALDH3B1</a>   |
| DR1      | Down-Regulator Of Transcription 1<br>Ankyrin Repeat | Protein Coding | 39 | GC01P093345 | 6.064288 | <a href="https://www.genecards.org/cgi-bin/carddisp.pl?gene=DR1">https://www.genecards.org/cgi-bin/carddisp.pl?gene=DR1</a>           |
| ANKS1B   | And Sterile Alpha Motif Domain<br>Containing 1B     | Protein Coding | 40 | GC12M098726 | 6.060338 | <a href="https://www.genecards.org/cgi-bin/carddisp.pl?gene=ANKS1B">https://www.genecards.org/cgi-bin/carddisp.pl?gene=ANKS1B</a>     |
| TUBG1    | Tubulin Gamma 1                                     | Protein Coding | 48 | GC17P042609 | 6.055662 | <a href="https://www.genecards.org/cgi-bin/carddisp.pl?gene=TUBG1">https://www.genecards.org/cgi-bin/carddisp.pl?gene=TUBG1</a>       |

|          |                                                                               |                |    |             |          |                                                                                                                                       |
|----------|-------------------------------------------------------------------------------|----------------|----|-------------|----------|---------------------------------------------------------------------------------------------------------------------------------------|
| RPLP2    | Ribosomal Protein Lateral Stalk Subunit P2                                    | Protein Coding | 42 | GC11P000984 | 6.04952  | <a href="https://www.genecards.org/cgi-bin/carddisp.pl?gene=RPLP2">https://www.genecards.org/cgi-bin/carddisp.pl?gene=RPLP2</a>       |
| ORM1     | Orosomucoid 1                                                                 | Protein Coding | 40 | GC09P114323 | 6.049231 | <a href="https://www.genecards.org/cgi-bin/carddisp.pl?gene=ORM1">https://www.genecards.org/cgi-bin/carddisp.pl?gene=ORM1</a>         |
| HSP90AB1 | Heat Shock Protein 90 Alpha Family Class B Member 1                           | Protein Coding | 46 | GC06P044246 | 6.049201 | <a href="https://www.genecards.org/cgi-bin/carddisp.pl?gene=HSP90AB1">https://www.genecards.org/cgi-bin/carddisp.pl?gene=HSP90AB1</a> |
| CDC25C   | Cell Division Cycle 25C Serpin Family A Member 2                              | Protein Coding | 49 | GC05M138285 | 6.048976 | <a href="https://www.genecards.org/cgi-bin/carddisp.pl?gene=CDC25C">https://www.genecards.org/cgi-bin/carddisp.pl?gene=CDC25C</a>     |
| SERPINA2 | (Gene/Pseudogene)                                                             | Protein Coding | 27 | GC14M095824 | 6.040594 | <a href="https://www.genecards.org/cgi-bin/carddisp.pl?gene=SERPINA2">https://www.genecards.org/cgi-bin/carddisp.pl?gene=SERPINA2</a> |
| CDK9     | Cyclin Dependent Kinase 9                                                     | Protein Coding | 47 | GC09P127852 | 6.038595 | <a href="https://www.genecards.org/cgi-bin/carddisp.pl?gene=CDK9">https://www.genecards.org/cgi-bin/carddisp.pl?gene=CDK9</a>         |
| CYP20A1  | Cytochrome P450 Family 20 Subfamily A Member 1                                | Protein Coding | 37 | GC02P203238 | 6.032894 | <a href="https://www.genecards.org/cgi-bin/carddisp.pl?gene=CYP20A1">https://www.genecards.org/cgi-bin/carddisp.pl?gene=CYP20A1</a>   |
| SLC22A6  | Solute Carrier Family 22 Member 6                                             | Protein Coding | 45 | GC11M069278 | 6.0297   | <a href="https://www.genecards.org/cgi-bin/carddisp.pl?gene=SLC22A6">https://www.genecards.org/cgi-bin/carddisp.pl?gene=SLC22A6</a>   |
| CALD1    | Caldesmon 1                                                                   | Protein Coding | 43 | GC07P134744 | 6.025928 | <a href="https://www.genecards.org/cgi-bin/carddisp.pl?gene=CALD1">https://www.genecards.org/cgi-bin/carddisp.pl?gene=CALD1</a>       |
| GMNN     | Geminin DNA Replication Inhibitor NAD(P) Dependent Steroid Dehydrogenase-Like | Protein Coding | 46 | GC06P024779 | 6.023028 | <a href="https://www.genecards.org/cgi-bin/carddisp.pl?gene=GMNN">https://www.genecards.org/cgi-bin/carddisp.pl?gene=GMNN</a>         |
| NSDHL    | Dependent Steroid Dehydrogenase-Like                                          | Protein Coding | 45 | GC0XP152830 | 6.021006 | <a href="https://www.genecards.org/cgi-bin/carddisp.pl?gene=NSDHL">https://www.genecards.org/cgi-bin/carddisp.pl?gene=NSDHL</a>       |
| PFKP     | Phosphofructokinase, Platelet                                                 | Protein Coding | 46 | GC10P003066 | 6.019036 | <a href="https://www.genecards.org/cgi-bin/carddisp.pl?gene=PFKP">https://www.genecards.org/cgi-bin/carddisp.pl?gene=PFKP</a>         |
| DAGLA    | Diacylglycerol Lipase Alpha                                                   | Protein Coding | 43 | GC11P061680 | 6.015265 | <a href="https://www.genecards.org/cgi-bin/carddisp.pl?gene=DAGLA">https://www.genecards.org/cgi-bin/carddisp.pl?gene=DAGLA</a>       |
| CBLB     | Cbl Proto-Oncogene B                                                          | Protein Coding | 45 | GC03M105655 | 6.014181 | <a href="https://www.genecards.org/cgi-bin/carddisp.pl?gene=CBLB">https://www.genecards.org/cgi-bin/carddisp.pl?gene=CBLB</a>         |
| RPL13    | Ribosomal Protein L13                                                         | Protein Coding | 43 | GC16P089802 | 6.010226 | <a href="https://www.genecards.org/cgi-bin/carddisp.pl?gene=RPL13">https://www.genecards.org/cgi-bin/carddisp.pl?gene=RPL13</a>       |
| DDR1     | Discoidin Domain Receptor Tyrosine Kinase 1                                   | Protein Coding | 47 | GC06P055184 | 6.007812 | <a href="https://www.genecards.org/cgi-bin/carddisp.pl?gene=DDR1">https://www.genecards.org/cgi-bin/carddisp.pl?gene=DDR1</a>         |
| H3-3B    | H3.3 Histone B                                                                | Protein Coding | 33 | GC17M075789 | 6.005374 | <a href="https://www.genecards.org/cgi-bin/carddisp.pl?gene=H3-3B">https://www.genecards.org/cgi-bin/carddisp.pl?gene=H3-3B</a>       |
| MIR510   | MicroRNA 510                                                                  | RNA Gene       | 15 | GC0XM147272 | 6.005273 | <a href="https://www.genecards.org/cgi-bin/carddisp.pl?gene=MIR510">https://www.genecards.org/cgi-bin/carddisp.pl?gene=MIR510</a>     |
| PRKCI    | Protein Kinase C Iota                                                         | Protein Coding | 49 | GC03P170222 | 6.003612 | <a href="https://www.genecards.org/cgi-bin/carddisp.pl?gene=PRKCI">https://www.genecards.org/cgi-bin/carddisp.pl?gene=PRKCI</a>       |

|            |                                                                    |                |    |             |          |                                                                                                                                           |
|------------|--------------------------------------------------------------------|----------------|----|-------------|----------|-------------------------------------------------------------------------------------------------------------------------------------------|
| HCK        | HCK Proto-Oncogene, Src Family Tyrosine Kinase                     | Protein Coding | 50 | GC20P032052 | 6.003108 | <a href="https://www.genecards.org/cgi-bin/carddisp.pl?gene=HCK">https://www.genecards.org/cgi-bin/carddisp.pl?gene=HCK</a>               |
| TPT1       | Tumor Protein, Translationally-Controlled 1                        | Protein Coding | 47 | GC13M045333 | 5.998327 | <a href="https://www.genecards.org/cgi-bin/carddisp.pl?gene=TPT1">https://www.genecards.org/cgi-bin/carddisp.pl?gene=TPT1</a>             |
| PLAA       | Phospholipase A2 Activating Protein                                | Protein Coding | 45 | GC09M026903 | 5.997488 | <a href="https://www.genecards.org/cgi-bin/carddisp.pl?gene=PLAA">https://www.genecards.org/cgi-bin/carddisp.pl?gene=PLAA</a>             |
| GHRHR      | Growth Hormone Releasing Hormone Receptor                          | Protein Coding | 44 | GC07P030938 | 5.995602 | <a href="https://www.genecards.org/cgi-bin/carddisp.pl?gene=GHRHR">https://www.genecards.org/cgi-bin/carddisp.pl?gene=GHRHR</a>           |
| NCAPH2     | Non-SMC Condensin II Complex Subunit H2                            | Protein Coding | 38 | GC22P050508 | 5.99403  | <a href="https://www.genecards.org/cgi-bin/carddisp.pl?gene=NCAPH2">https://www.genecards.org/cgi-bin/carddisp.pl?gene=NCAPH2</a>         |
| SUZ12      | SUZ12 Polycomb Repressive Complex 2 Subunit                        | Protein Coding | 41 | GC17P031937 | 5.989062 | <a href="https://www.genecards.org/cgi-bin/carddisp.pl?gene=SUZ12">https://www.genecards.org/cgi-bin/carddisp.pl?gene=SUZ12</a>           |
| RPL6       | Ribosomal Protein L6                                               | Protein Coding | 40 | GC12M112320 | 5.987618 | <a href="https://www.genecards.org/cgi-bin/carddisp.pl?gene=RPL6">https://www.genecards.org/cgi-bin/carddisp.pl?gene=RPL6</a>             |
| KHDRBS1    | KH RNA Binding Domain Containing, Signal Transduction Associated 1 | Protein Coding | 43 | GC01P032013 | 5.987313 | <a href="https://www.genecards.org/cgi-bin/carddisp.pl?gene=KHDRBS1">https://www.genecards.org/cgi-bin/carddisp.pl?gene=KHDRBS1</a>       |
| RPN1       | Ribophorin I                                                       | Protein Coding | 44 | GC03M128619 | 5.986773 | <a href="https://www.genecards.org/cgi-bin/carddisp.pl?gene=RPN1">https://www.genecards.org/cgi-bin/carddisp.pl?gene=RPN1</a>             |
| MAPK11     | Mitogen-Activated Protein Kinase 11                                | Protein Coding | 48 | GC22M050263 | 5.986226 | <a href="https://www.genecards.org/cgi-bin/carddisp.pl?gene=MAPK11">https://www.genecards.org/cgi-bin/carddisp.pl?gene=MAPK11</a>         |
| GK2        | Glycerol Kinase 2                                                  | Protein Coding | 41 | GC04M079406 | 5.985163 | <a href="https://www.genecards.org/cgi-bin/carddisp.pl?gene=GK2">https://www.genecards.org/cgi-bin/carddisp.pl?gene=GK2</a>               |
| LNCRNA-ATB | Long Noncoding RNA Activated By TGF-Beta                           | RNA Gene       | 4  | GC14P021619 | 5.985048 | <a href="https://www.genecards.org/cgi-bin/carddisp.pl?gene=LNCRNA-ATB">https://www.genecards.org/cgi-bin/carddisp.pl?gene=LNCRNA-ATB</a> |
| EFNB2      | Ephrin B2                                                          | Protein Coding | 44 | GC13M106489 | 5.981742 | <a href="https://www.genecards.org/cgi-bin/carddisp.pl?gene=EFNB2">https://www.genecards.org/cgi-bin/carddisp.pl?gene=EFNB2</a>           |
| WT1-AS     | WT1 Antisense RNA                                                  | RNA Gene       | 25 | GC11P032434 | 5.974708 | <a href="https://www.genecards.org/cgi-bin/carddisp.pl?gene=WT1-AS">https://www.genecards.org/cgi-bin/carddisp.pl?gene=WT1-AS</a>         |
| MNX1       | Motor Neuron And Pancreas Homeobox 1                               | Protein Coding | 43 | GC07M156994 | 5.974269 | <a href="https://www.genecards.org/cgi-bin/carddisp.pl?gene=MNX1">https://www.genecards.org/cgi-bin/carddisp.pl?gene=MNX1</a>             |
| IFI16      | Interferon Gamma Inducible Protein 16                              | Protein Coding | 43 | GC01P158969 | 5.973341 | <a href="https://www.genecards.org/cgi-bin/carddisp.pl?gene=IFI16">https://www.genecards.org/cgi-bin/carddisp.pl?gene=IFI16</a>           |

|         |                                                          |                |    |             |          |                                                                                                                                     |
|---------|----------------------------------------------------------|----------------|----|-------------|----------|-------------------------------------------------------------------------------------------------------------------------------------|
| EIF2S3  | Eukaryotic Translation Initiation Factor 2 Subunit Gamma | Protein Coding | 46 | GC0XP024054 | 5.972932 | <a href="https://www.genecards.org/cgi-bin/carddisp.pl?gene=EIF2S3">https://www.genecards.org/cgi-bin/carddisp.pl?gene=EIF2S3</a>   |
| CYP4F8  | Cytochrome P450 Family 4 Subfamily F Member 8            | Protein Coding | 36 | GC19P015617 | 5.971796 | <a href="https://www.genecards.org/cgi-bin/carddisp.pl?gene=CYP4F8">https://www.genecards.org/cgi-bin/carddisp.pl?gene=CYP4F8</a>   |
| COA6    | Cytochrome C Oxidase Assembly Factor 6                   | Protein Coding | 36 | GC01P234374 | 5.971249 | <a href="https://www.genecards.org/cgi-bin/carddisp.pl?gene=COA6">https://www.genecards.org/cgi-bin/carddisp.pl?gene=COA6</a>       |
| TP53I3  | Tumor Protein P53 Inducible Protein 3                    | Protein Coding | 43 | GC02M024078 | 5.968201 | <a href="https://www.genecards.org/cgi-bin/carddisp.pl?gene=TP53I3">https://www.genecards.org/cgi-bin/carddisp.pl?gene=TP53I3</a>   |
| NGF-AS1 | NGF Antisense RNA 1                                      | RNA Gene       | 10 | GC01P115280 | 5.968042 | <a href="https://www.genecards.org/cgi-bin/carddisp.pl?gene=NGF-AS1">https://www.genecards.org/cgi-bin/carddisp.pl?gene=NGF-AS1</a> |
| TNR     | Tenascin R                                               | Protein Coding | 43 | GC01M175291 | 5.96588  | <a href="https://www.genecards.org/cgi-bin/carddisp.pl?gene=TNR">https://www.genecards.org/cgi-bin/carddisp.pl?gene=TNR</a>         |
| TREH    | Trehalase                                                | Protein Coding | 43 | GC11M118657 | 5.961953 | <a href="https://www.genecards.org/cgi-bin/carddisp.pl?gene=TREH">https://www.genecards.org/cgi-bin/carddisp.pl?gene=TREH</a>       |
| RAB1A   | RAB1A, Member RAS Oncogene Family                        | Protein Coding | 43 | GC02M065072 | 5.957717 | <a href="https://www.genecards.org/cgi-bin/carddisp.pl?gene=RAB1A">https://www.genecards.org/cgi-bin/carddisp.pl?gene=RAB1A</a>     |
| TAF4    | TATA-Box Binding Protein Associated Factor 4             | Protein Coding | 40 | GC20M061994 | 5.955125 | <a href="https://www.genecards.org/cgi-bin/carddisp.pl?gene=TAF4">https://www.genecards.org/cgi-bin/carddisp.pl?gene=TAF4</a>       |
| PAPSS2  | 3'-Phosphoadenosine 5'-Phosphosulfate Synthase 2         | Protein Coding | 45 | GC10P087659 | 5.954879 | <a href="https://www.genecards.org/cgi-bin/carddisp.pl?gene=PAPSS2">https://www.genecards.org/cgi-bin/carddisp.pl?gene=PAPSS2</a>   |
| CAPZA2  | Capping Actin Protein Of Muscle Z-Line Subunit Alpha 2   | Protein Coding | 42 | GC07P116811 | 5.953159 | <a href="https://www.genecards.org/cgi-bin/carddisp.pl?gene=CAPZA2">https://www.genecards.org/cgi-bin/carddisp.pl?gene=CAPZA2</a>   |
| HS3ST1  | Heparan Sulfate-Glucosamine 3-Sulfotransferase 1         | Protein Coding | 43 | GC04M011394 | 5.952091 | <a href="https://www.genecards.org/cgi-bin/carddisp.pl?gene=HS3ST1">https://www.genecards.org/cgi-bin/carddisp.pl?gene=HS3ST1</a>   |
| RAB18   | RAB18, Member RAS Oncogene Family                        | Protein Coding | 41 | GC10P027504 | 5.950797 | <a href="https://www.genecards.org/cgi-bin/carddisp.pl?gene=RAB18">https://www.genecards.org/cgi-bin/carddisp.pl?gene=RAB18</a>     |

|         |                                                             |                |    |             |          |                                                                                                                                     |
|---------|-------------------------------------------------------------|----------------|----|-------------|----------|-------------------------------------------------------------------------------------------------------------------------------------|
| LAMTOR5 | Late Endosomal/Lysosomal Adaptor, MAPK And MTOR Activator 5 | Protein Coding | 37 | GC01M110401 | 5.950655 | <a href="https://www.genecards.org/cgi-bin/carddisp.pl?gene=LAMTOR5">https://www.genecards.org/cgi-bin/carddisp.pl?gene=LAMTOR5</a> |
| DNAJA3  | DnaJ Heat Shock Protein Family (Hsp40) Member A3            | Protein Coding | 41 | GC16P004425 | 5.950645 | <a href="https://www.genecards.org/cgi-bin/carddisp.pl?gene=DNAJA3">https://www.genecards.org/cgi-bin/carddisp.pl?gene=DNAJA3</a>   |
| GLRX    | Glutaredoxin                                                | Protein Coding | 45 | GC05M095752 | 5.950015 | <a href="https://www.genecards.org/cgi-bin/carddisp.pl?gene=GLRX">https://www.genecards.org/cgi-bin/carddisp.pl?gene=GLRX</a>       |
| MCM3    | Minichromosome Maintenance Complex Component 3              | Protein Coding | 46 | GC06M052264 | 5.94873  | <a href="https://www.genecards.org/cgi-bin/carddisp.pl?gene=MCM3">https://www.genecards.org/cgi-bin/carddisp.pl?gene=MCM3</a>       |
| USP24   | Ubiquitin Specific Peptidase 24                             | Protein Coding | 44 | GC01M055066 | 5.946398 | <a href="https://www.genecards.org/cgi-bin/carddisp.pl?gene=USP24">https://www.genecards.org/cgi-bin/carddisp.pl?gene=USP24</a>     |
| RSAD2   | Radical S-Adenosyl Methionine Domain Containing 2           | Protein Coding | 41 | GC02P006865 | 5.936877 | <a href="https://www.genecards.org/cgi-bin/carddisp.pl?gene=RSAD2">https://www.genecards.org/cgi-bin/carddisp.pl?gene=RSAD2</a>     |
| IL1R2   | Interleukin 1 Receptor Type 2                               | Protein Coding | 45 | GC02P101991 | 5.934972 | <a href="https://www.genecards.org/cgi-bin/carddisp.pl?gene=IL1R2">https://www.genecards.org/cgi-bin/carddisp.pl?gene=IL1R2</a>     |
| RPL12   | Ribosomal Protein L12                                       | Protein Coding | 43 | GC09M127447 | 5.934464 | <a href="https://www.genecards.org/cgi-bin/carddisp.pl?gene=RPL12">https://www.genecards.org/cgi-bin/carddisp.pl?gene=RPL12</a>     |
| APBA2   | Amyloid Beta Precursor Protein Binding Family A Member 2    | Protein Coding | 43 | GC15P029286 | 5.932015 | <a href="https://www.genecards.org/cgi-bin/carddisp.pl?gene=APBA2">https://www.genecards.org/cgi-bin/carddisp.pl?gene=APBA2</a>     |
| NDUFA8  | NADH:Ubiquinone Oxidoreductase Subunit A8                   | Protein Coding | 43 | GC09M122132 | 5.925574 | <a href="https://www.genecards.org/cgi-bin/carddisp.pl?gene=NDUFA8">https://www.genecards.org/cgi-bin/carddisp.pl?gene=NDUFA8</a>   |
| UQCR11  | Ubiquinol-Cytochrome C Reductase, Complex III Subunit XI    | Protein Coding | 37 | GC19M001597 | 5.922102 | <a href="https://www.genecards.org/cgi-bin/carddisp.pl?gene=UQCR11">https://www.genecards.org/cgi-bin/carddisp.pl?gene=UQCR11</a>   |
| SAR1A   | Secretion Associated Ras Related GTPase 1A                  | Protein Coding | 43 | GC10M070147 | 5.919758 | <a href="https://www.genecards.org/cgi-bin/carddisp.pl?gene=SAR1A">https://www.genecards.org/cgi-bin/carddisp.pl?gene=SAR1A</a>     |
| KPNB1   | Karyopherin Subunit Beta 1                                  | Protein Coding | 44 | GC17P047649 | 5.907356 | <a href="https://www.genecards.org/cgi-bin/carddisp.pl?gene=KPNB1">https://www.genecards.org/cgi-bin/carddisp.pl?gene=KPNB1</a>     |
| NDUFA5  | NADH:Ubiquinone Oxidoreductase Subunit A5                   | Protein Coding | 43 | GC07M123536 | 5.905532 | <a href="https://www.genecards.org/cgi-bin/carddisp.pl?gene=NDUFA5">https://www.genecards.org/cgi-bin/carddisp.pl?gene=NDUFA5</a>   |

|          |                                                              |                |    |             |          |                                                                                                                                       |
|----------|--------------------------------------------------------------|----------------|----|-------------|----------|---------------------------------------------------------------------------------------------------------------------------------------|
| CRHR2    | Corticotropin Releasing Hormone Receptor 2                   | Protein Coding | 43 | GC07M030651 | 5.905317 | <a href="https://www.genecards.org/cgi-bin/carddisp.pl?gene=CRHR2">https://www.genecards.org/cgi-bin/carddisp.pl?gene=CRHR2</a>       |
| SPTLC3   | Serine Palmitoyltransferase Long Chain Base Subunit 3        | Protein Coding | 41 | GC20P013008 | 5.905272 | <a href="https://www.genecards.org/cgi-bin/carddisp.pl?gene=SPTLC3">https://www.genecards.org/cgi-bin/carddisp.pl?gene=SPTLC3</a>     |
| DDX6     | DEAD-Box Helicase 6                                          | Protein Coding | 47 | GC11M118748 | 5.899421 | <a href="https://www.genecards.org/cgi-bin/carddisp.pl?gene=DDX6">https://www.genecards.org/cgi-bin/carddisp.pl?gene=DDX6</a>         |
| FKBP1A   | FKBP Prolyl Isomerase 1A                                     | Protein Coding | 47 | GC20M001369 | 5.898264 | <a href="https://www.genecards.org/cgi-bin/carddisp.pl?gene=FKBP1A">https://www.genecards.org/cgi-bin/carddisp.pl?gene=FKBP1A</a>     |
| TP73-AS1 | TP73 Antisense RNA 1                                         | RNA Gene       | 22 | GC01M003735 | 5.895761 | <a href="https://www.genecards.org/cgi-bin/carddisp.pl?gene=TP73-AS1">https://www.genecards.org/cgi-bin/carddisp.pl?gene=TP73-AS1</a> |
| RHEB     | Ras Homolog, MTORC1 Binding                                  | Protein Coding | 49 | GC07M151466 | 5.892027 | <a href="https://www.genecards.org/cgi-bin/carddisp.pl?gene=RHEB">https://www.genecards.org/cgi-bin/carddisp.pl?gene=RHEB</a>         |
| GPX7     | Glutathione Peroxidase 7                                     | Protein Coding | 44 | GC01P052602 | 5.891564 | <a href="https://www.genecards.org/cgi-bin/carddisp.pl?gene=GPX7">https://www.genecards.org/cgi-bin/carddisp.pl?gene=GPX7</a>         |
| RTL1     | Retrotransposon Gag Like 1                                   | Protein Coding | 31 | GC14M100880 | 5.889184 | <a href="https://www.genecards.org/cgi-bin/carddisp.pl?gene=RTL1">https://www.genecards.org/cgi-bin/carddisp.pl?gene=RTL1</a>         |
| NFE2L1   | Nuclear Factor, Erythroid 2 Like 1                           | Protein Coding | 44 | GC17P048049 | 5.88813  | <a href="https://www.genecards.org/cgi-bin/carddisp.pl?gene=NFE2L1">https://www.genecards.org/cgi-bin/carddisp.pl?gene=NFE2L1</a>     |
| HSPBP1   | HSPA (Hsp70) Binding Protein 1                               | Protein Coding | 37 | GC19M055262 | 5.887337 | <a href="https://www.genecards.org/cgi-bin/carddisp.pl?gene=HSPBP1">https://www.genecards.org/cgi-bin/carddisp.pl?gene=HSPBP1</a>     |
| PABPC1   | Poly(A) Binding Protein Cytoplasmic 1                        | Protein Coding | 43 | GC08M100685 | 5.88552  | <a href="https://www.genecards.org/cgi-bin/carddisp.pl?gene=PABPC1">https://www.genecards.org/cgi-bin/carddisp.pl?gene=PABPC1</a>     |
| ST8SIA1  | ST8 Alpha-N-Acetyl-Neuraminide Alpha-2,8-Sialyltransferase 1 | Protein Coding | 41 | GC12M022063 | 5.883532 | <a href="https://www.genecards.org/cgi-bin/carddisp.pl?gene=ST8SIA1">https://www.genecards.org/cgi-bin/carddisp.pl?gene=ST8SIA1</a>   |
| TMPRSS2  | Transmembrane Serine Protease 2                              | Protein Coding | 45 | GC21M041464 | 5.883377 | <a href="https://www.genecards.org/cgi-bin/carddisp.pl?gene=TMPRSS2">https://www.genecards.org/cgi-bin/carddisp.pl?gene=TMPRSS2</a>   |
| ACP4     | Acid Phosphatase 4                                           | Protein Coding | 29 | GC19P050791 | 5.882225 | <a href="https://www.genecards.org/cgi-bin/carddisp.pl?gene=ACP4">https://www.genecards.org/cgi-bin/carddisp.pl?gene=ACP4</a>         |
| YBX3     | Y-Box Binding Protein 3                                      | Protein Coding | 40 | GC12M015696 | 5.881638 | <a href="https://www.genecards.org/cgi-bin/carddisp.pl?gene=YBX3">https://www.genecards.org/cgi-bin/carddisp.pl?gene=YBX3</a>         |
| SRPRB    | SRP Receptor Subunit Beta                                    | Protein Coding | 38 | GC03P133784 | 5.881456 | <a href="https://www.genecards.org/cgi-bin/carddisp.pl?gene=SRPRB">https://www.genecards.org/cgi-bin/carddisp.pl?gene=SRPRB</a>       |
| PLCD1    | Phospholipase C Delta 1                                      | Protein Coding | 48 | GC03M038008 | 5.879849 | <a href="https://www.genecards.org/cgi-bin/carddisp.pl?gene=PLCD1">https://www.genecards.org/cgi-bin/carddisp.pl?gene=PLCD1</a>       |
| ERRFI1   | ERBB Receptor Feedback Inhibitor 1                           | Protein Coding | 38 | GC01M008004 | 5.879412 | <a href="https://www.genecards.org/cgi-bin/carddisp.pl?gene=ERRFI1">https://www.genecards.org/cgi-bin/carddisp.pl?gene=ERRFI1</a>     |
| ZNF395   | Zinc Finger Protein 395                                      | Protein Coding | 32 | GC08M028345 | 5.876712 | <a href="https://www.genecards.org/cgi-bin/carddisp.pl?gene=ZNF395">https://www.genecards.org/cgi-bin/carddisp.pl?gene=ZNF395</a>     |
| SELPLG   | Selectin P Ligand                                            | Protein Coding | 43 | GC12M108621 | 5.872985 | <a href="https://www.genecards.org/cgi-bin/carddisp.pl?gene=SELPLG">https://www.genecards.org/cgi-bin/carddisp.pl?gene=SELPLG</a>     |

|           |                                                 |                |    |             |          |                                                                                                                                         |
|-----------|-------------------------------------------------|----------------|----|-------------|----------|-----------------------------------------------------------------------------------------------------------------------------------------|
| CCRL2     | C-C Motif Chemokine Receptor Like 2             | Protein Coding | 40 | GC03P046407 | 5.868557 | <a href="https://www.genecards.org/cgi-bin/carddisp.pl?gene=CCRL2">https://www.genecards.org/cgi-bin/carddisp.pl?gene=CCRL2</a>         |
| TBC1D20   | TBC1 Domain Family Member 20                    | Protein Coding | 38 | GC20M000423 | 5.86662  | <a href="https://www.genecards.org/cgi-bin/carddisp.pl?gene=TBC1D20">https://www.genecards.org/cgi-bin/carddisp.pl?gene=TBC1D20</a>     |
| DUSP6     | Dual Specificity Phosphatase 6                  | Protein Coding | 50 | GC12M089347 | 5.859518 | <a href="https://www.genecards.org/cgi-bin/carddisp.pl?gene=DUSP6">https://www.genecards.org/cgi-bin/carddisp.pl?gene=DUSP6</a>         |
| AGPAT5    | 1-Acylglycerol-3-Phosphate O-Acyltransferase 5  | Protein Coding | 42 | GC08P006708 | 5.856453 | <a href="https://www.genecards.org/cgi-bin/carddisp.pl?gene=AGPAT5">https://www.genecards.org/cgi-bin/carddisp.pl?gene=AGPAT5</a>       |
| VAT1L     | Vesicle Amine Transport 1 Like                  | Protein Coding | 36 | GC16P077788 | 5.855437 | <a href="https://www.genecards.org/cgi-bin/carddisp.pl?gene=VAT1L">https://www.genecards.org/cgi-bin/carddisp.pl?gene=VAT1L</a>         |
| GRK5      | G Protein-Coupled Receptor Kinase 5             | Protein Coding | 44 | GC10P119207 | 5.855268 | <a href="https://www.genecards.org/cgi-bin/carddisp.pl?gene=GRK5">https://www.genecards.org/cgi-bin/carddisp.pl?gene=GRK5</a>           |
| TNFRSF12A | TNF Receptor Superfamily Member 12A             | Protein Coding | 44 | GC16P003018 | 5.851414 | <a href="https://www.genecards.org/cgi-bin/carddisp.pl?gene=TNFRSF12A">https://www.genecards.org/cgi-bin/carddisp.pl?gene=TNFRSF12A</a> |
| LSP1      | Lymphocyte Specific Protein 1                   | Protein Coding | 43 | GC11P001852 | 5.848055 | <a href="https://www.genecards.org/cgi-bin/carddisp.pl?gene=LSP1">https://www.genecards.org/cgi-bin/carddisp.pl?gene=LSP1</a>           |
| IL34      | Interleukin 34                                  | Protein Coding | 40 | GC16P070656 | 5.845536 | <a href="https://www.genecards.org/cgi-bin/carddisp.pl?gene=IL34">https://www.genecards.org/cgi-bin/carddisp.pl?gene=IL34</a>           |
| SIRT5     | Sirtuin 5                                       | Protein Coding | 45 | GC06P013574 | 5.840052 | <a href="https://www.genecards.org/cgi-bin/carddisp.pl?gene=SIRT5">https://www.genecards.org/cgi-bin/carddisp.pl?gene=SIRT5</a>         |
| HSD17B1   | Hydroxysteroid 17-Beta Dehydrogenase 1          | Protein Coding | 44 | GC17P042548 | 5.839081 | <a href="https://www.genecards.org/cgi-bin/carddisp.pl?gene=HSD17B1">https://www.genecards.org/cgi-bin/carddisp.pl?gene=HSD17B1</a>     |
| CCNC      | Cyclin C                                        | Protein Coding | 41 | GC06M099542 | 5.837391 | <a href="https://www.genecards.org/cgi-bin/carddisp.pl?gene=CCNC">https://www.genecards.org/cgi-bin/carddisp.pl?gene=CCNC</a>           |
| GCN1      | GCN1 Activator Of EIF2AK4                       | Protein Coding | 29 | GC12M120128 | 5.835604 | <a href="https://www.genecards.org/cgi-bin/carddisp.pl?gene=GCN1">https://www.genecards.org/cgi-bin/carddisp.pl?gene=GCN1</a>           |
| SMAD1     | SMAD Family Member 1                            | Protein Coding | 44 | GC04P145481 | 5.8343   | <a href="https://www.genecards.org/cgi-bin/carddisp.pl?gene=SMAD1">https://www.genecards.org/cgi-bin/carddisp.pl?gene=SMAD1</a>         |
| ACBD3     | Acyl-CoA Binding Domain Containing 3            | Protein Coding | 39 | GC01M226144 | 5.83311  | <a href="https://www.genecards.org/cgi-bin/carddisp.pl?gene=ACBD3">https://www.genecards.org/cgi-bin/carddisp.pl?gene=ACBD3</a>         |
| ROR2      | Receptor Tyrosine Kinase Like Orphan Receptor 2 | Protein Coding | 49 | GC09M091564 | 5.827224 | <a href="https://www.genecards.org/cgi-bin/carddisp.pl?gene=ROR2">https://www.genecards.org/cgi-bin/carddisp.pl?gene=ROR2</a>           |
| PIAS1     | Protein Inhibitor Of Activated STAT 1           | Protein Coding | 45 | GC15P068054 | 5.825125 | <a href="https://www.genecards.org/cgi-bin/carddisp.pl?gene=PIAS1">https://www.genecards.org/cgi-bin/carddisp.pl?gene=PIAS1</a>         |
| CA3       | Carbonic Anhydrase 3                            | Protein Coding | 42 | GC08P085373 | 5.824769 | <a href="https://www.genecards.org/cgi-bin/carddisp.pl?gene=CA3">https://www.genecards.org/cgi-bin/carddisp.pl?gene=CA3</a>             |

|         |                                                                           |                   |    |                 |          |                                                                                                                                     |
|---------|---------------------------------------------------------------------------|-------------------|----|-----------------|----------|-------------------------------------------------------------------------------------------------------------------------------------|
| PCBP2   | Poly(RC)<br>Binding Protein 2                                             | Protein<br>Coding | 42 | GC12P0534<br>52 | 5.822852 | <a href="https://www.genecards.org/cgi-bin/carddisp.pl?gene=PCBP2">https://www.genecards.org/cgi-bin/carddisp.pl?gene=PCBP2</a>     |
| RCVRN   | Recoverin                                                                 | Protein<br>Coding | 39 | GC17M009<br>896 | 5.8212   | <a href="https://www.genecards.org/cgi-bin/carddisp.pl?gene=RCVRN">https://www.genecards.org/cgi-bin/carddisp.pl?gene=RCVRN</a>     |
| BCAT1   | Branched<br>Chain Amino<br>Acid<br>Transaminase 1                         | Protein<br>Coding | 47 | GC12M024<br>732 | 5.816948 | <a href="https://www.genecards.org/cgi-bin/carddisp.pl?gene=BCAT1">https://www.genecards.org/cgi-bin/carddisp.pl?gene=BCAT1</a>     |
| HNRNPH1 | Heterogeneous<br>Nuclear<br>Ribonucleoprotein H1                          | Protein<br>Coding | 40 | GC05M179<br>614 | 5.814712 | <a href="https://www.genecards.org/cgi-bin/carddisp.pl?gene=HNRNPH1">https://www.genecards.org/cgi-bin/carddisp.pl?gene=HNRNPH1</a> |
| SEMA4G  | Semaphorin 4G                                                             | Protein<br>Coding | 40 | GC10P1009<br>69 | 5.813663 | <a href="https://www.genecards.org/cgi-bin/carddisp.pl?gene=SEMA4G">https://www.genecards.org/cgi-bin/carddisp.pl?gene=SEMA4G</a>   |
| PLAAT3  | Phospholipase<br>A And<br>Acyltransferase 3                               | Protein<br>Coding | 34 | GC11M069<br>298 | 5.813105 | <a href="https://www.genecards.org/cgi-bin/carddisp.pl?gene=PLAAT3">https://www.genecards.org/cgi-bin/carddisp.pl?gene=PLAAT3</a>   |
| UBR5    | Ubiquitin<br>Protein Ligase<br>E3 Component<br>N-Recognin 5               | Protein<br>Coding | 43 | GC08M102<br>252 | 5.810266 | <a href="https://www.genecards.org/cgi-bin/carddisp.pl?gene=UBR5">https://www.genecards.org/cgi-bin/carddisp.pl?gene=UBR5</a>       |
| METAP2  | Methionyl<br>Aminopeptidase 2                                             | Protein<br>Coding | 45 | GC12P0954<br>73 | 5.806044 | <a href="https://www.genecards.org/cgi-bin/carddisp.pl?gene=METAP2">https://www.genecards.org/cgi-bin/carddisp.pl?gene=METAP2</a>   |
| PFKFB3  | 6-<br>Phosphofructo-<br>2-<br>Kinase/Fructose<br>-2,6-<br>Biphosphatase 3 | Protein<br>Coding | 45 | GC10P0061<br>44 | 5.805576 | <a href="https://www.genecards.org/cgi-bin/carddisp.pl?gene=PFKFB3">https://www.genecards.org/cgi-bin/carddisp.pl?gene=PFKFB3</a>   |
| MN1     | MN1 Proto-<br>Oncogene,<br>Transcriptional<br>Regulator                   | Protein<br>Coding | 43 | GC22M027<br>748 | 5.804852 | <a href="https://www.genecards.org/cgi-bin/carddisp.pl?gene=MN1">https://www.genecards.org/cgi-bin/carddisp.pl?gene=MN1</a>         |
| TAC3    | Tachykinin<br>Precursor 3                                                 | Protein<br>Coding | 45 | GC12M057<br>009 | 5.802037 | <a href="https://www.genecards.org/cgi-bin/carddisp.pl?gene=TAC3">https://www.genecards.org/cgi-bin/carddisp.pl?gene=TAC3</a>       |
| ARHGAP1 | Rho GTPase<br>Activating<br>Protein 1                                     | Protein<br>Coding | 44 | GC11M068<br>978 | 5.801293 | <a href="https://www.genecards.org/cgi-bin/carddisp.pl?gene=ARHGAP1">https://www.genecards.org/cgi-bin/carddisp.pl?gene=ARHGAP1</a> |
| RPS11   | Ribosomal<br>Protein S11                                                  | Protein<br>Coding | 40 | GC19P0494<br>96 | 5.797147 | <a href="https://www.genecards.org/cgi-bin/carddisp.pl?gene=RPS11">https://www.genecards.org/cgi-bin/carddisp.pl?gene=RPS11</a>     |
| DUSP19  | Dual Specificity<br>Phosphatase 19                                        | Protein<br>Coding | 39 | GC02P1830<br>78 | 5.794615 | <a href="https://www.genecards.org/cgi-bin/carddisp.pl?gene=DUSP19">https://www.genecards.org/cgi-bin/carddisp.pl?gene=DUSP19</a>   |
| IL3RA   | Interleukin 3<br>Receptor<br>Subunit Alpha                                | Protein<br>Coding | 43 | GC0XP0013<br>36 | 5.793341 | <a href="https://www.genecards.org/cgi-bin/carddisp.pl?gene=IL3RA">https://www.genecards.org/cgi-bin/carddisp.pl?gene=IL3RA</a>     |
| CADPS   | Calcium<br>Dependent<br>Secretion<br>Activator                            | Protein<br>Coding | 41 | GC03M062<br>398 | 5.792899 | <a href="https://www.genecards.org/cgi-bin/carddisp.pl?gene=CADPS">https://www.genecards.org/cgi-bin/carddisp.pl?gene=CADPS</a>     |



|          |                                                      |                |    |             |          |                                                                                                                                       |
|----------|------------------------------------------------------|----------------|----|-------------|----------|---------------------------------------------------------------------------------------------------------------------------------------|
| IGF2BP1  | Insulin Like Growth Factor 2 mRNA Binding Protein 1  | Protein Coding | 41 | GC17P048997 | 5.786264 | <a href="https://www.genecards.org/cgi-bin/carddisp.pl?gene=IGF2BP1">https://www.genecards.org/cgi-bin/carddisp.pl?gene=IGF2BP1</a>   |
| SVIL     | Supervillin                                          | Protein Coding | 42 | GC10M031105 | 5.781621 | <a href="https://www.genecards.org/cgi-bin/carddisp.pl?gene=SVIL">https://www.genecards.org/cgi-bin/carddisp.pl?gene=SVIL</a>         |
| SLC3A2   | Solute Carrier Family 3 Member 2                     | Protein Coding | 43 | GC11P062856 | 5.775519 | <a href="https://www.genecards.org/cgi-bin/carddisp.pl?gene=SLC3A2">https://www.genecards.org/cgi-bin/carddisp.pl?gene=SLC3A2</a>     |
| AKAP13   | A-Kinase Anchoring Protein 13                        | Protein Coding | 44 | GC15P085388 | 5.773824 | <a href="https://www.genecards.org/cgi-bin/carddisp.pl?gene=AKAP13">https://www.genecards.org/cgi-bin/carddisp.pl?gene=AKAP13</a>     |
| PRKACB   | Protein Kinase CAMP-Activated Catalytic Subunit Beta | Protein Coding | 50 | GC01P084078 | 5.772684 | <a href="https://www.genecards.org/cgi-bin/carddisp.pl?gene=PRKACB">https://www.genecards.org/cgi-bin/carddisp.pl?gene=PRKACB</a>     |
| SLC25A11 | Solute Carrier Family 25 Member 11                   | Protein Coding | 44 | GC17M004937 | 5.769321 | <a href="https://www.genecards.org/cgi-bin/carddisp.pl?gene=SLC25A11">https://www.genecards.org/cgi-bin/carddisp.pl?gene=SLC25A11</a> |
| DHDH     | Dihydrodiol Dehydrogenase                            | Protein Coding | 37 | GC19P048934 | 5.766547 | <a href="https://www.genecards.org/cgi-bin/carddisp.pl?gene=DHDH">https://www.genecards.org/cgi-bin/carddisp.pl?gene=DHDH</a>         |
| USF2     | Upstream Transcription Factor 2, C-Fos Interacting   | Protein Coding | 40 | GC19P035268 | 5.763486 | <a href="https://www.genecards.org/cgi-bin/carddisp.pl?gene=USF2">https://www.genecards.org/cgi-bin/carddisp.pl?gene=USF2</a>         |
| BCAT2    | Branched Chain Amino Acid Transaminase 2             | Protein Coding | 46 | GC19M048795 | 5.760746 | <a href="https://www.genecards.org/cgi-bin/carddisp.pl?gene=BCAT2">https://www.genecards.org/cgi-bin/carddisp.pl?gene=BCAT2</a>       |
| MOGAT3   | Monoacylglycerol O-Acyltransferase 3                 | Protein Coding | 33 | GC07M101192 | 5.758605 | <a href="https://www.genecards.org/cgi-bin/carddisp.pl?gene=MOGAT3">https://www.genecards.org/cgi-bin/carddisp.pl?gene=MOGAT3</a>     |
| NORAD    | Non-Coding RNA Activated By DNA Damage               | RNA Gene       | 14 | GC20M036096 | 5.754325 | <a href="https://www.genecards.org/cgi-bin/carddisp.pl?gene=NORAD">https://www.genecards.org/cgi-bin/carddisp.pl?gene=NORAD</a>       |
| PADI2    | Peptidyl Arginine Deiminase 2                        | Protein Coding | 42 | GC01M017066 | 5.74716  | <a href="https://www.genecards.org/cgi-bin/carddisp.pl?gene=PADI2">https://www.genecards.org/cgi-bin/carddisp.pl?gene=PADI2</a>       |
| CTF1     | Cardiotrophin 1                                      | Protein Coding | 40 | GC16P032484 | 5.746569 | <a href="https://www.genecards.org/cgi-bin/carddisp.pl?gene=CTF1">https://www.genecards.org/cgi-bin/carddisp.pl?gene=CTF1</a>         |
| BCYRN1   | Brain Cytoplasmic RNA 1                              | RNA Gene       | 18 | GC02P047331 | 5.746406 | <a href="https://www.genecards.org/cgi-bin/carddisp.pl?gene=BCYRN1">https://www.genecards.org/cgi-bin/carddisp.pl?gene=BCYRN1</a>     |
| PRDM5    | PR/SET Domain 5                                      | Protein Coding | 40 | GC04M120686 | 5.746255 | <a href="https://www.genecards.org/cgi-bin/carddisp.pl?gene=PRDM5">https://www.genecards.org/cgi-bin/carddisp.pl?gene=PRDM5</a>       |
| ARNT2    | Aryl Hydrocarbon Receptor Nuclear Translocator 2     | Protein Coding | 44 | GC15P080404 | 5.744976 | <a href="https://www.genecards.org/cgi-bin/carddisp.pl?gene=ARNT2">https://www.genecards.org/cgi-bin/carddisp.pl?gene=ARNT2</a>       |
| PLS1     | Plastin 1                                            | Protein Coding | 42 | GC03P142596 | 5.738134 | <a href="https://www.genecards.org/cgi-bin/carddisp.pl?gene=PLS1">https://www.genecards.org/cgi-bin/carddisp.pl?gene=PLS1</a>         |

|          |                                                |                |    |             |          |                                                                                                                                       |
|----------|------------------------------------------------|----------------|----|-------------|----------|---------------------------------------------------------------------------------------------------------------------------------------|
| SGMS2    | Sphingomyelin Synthase 2                       | Protein Coding | 37 | GC04P107824 | 5.73733  | <a href="https://www.genecards.org/cgi-bin/carddisp.pl?gene=SGMS2">https://www.genecards.org/cgi-bin/carddisp.pl?gene=SGMS2</a>       |
| IL5RA    | Interleukin 5 Receptor Subunit Alpha           | Protein Coding | 47 | GC03M003066 | 5.736702 | <a href="https://www.genecards.org/cgi-bin/carddisp.pl?gene=IL5RA">https://www.genecards.org/cgi-bin/carddisp.pl?gene=IL5RA</a>       |
| DEFB103B | Defensin Beta 103B                             | Protein Coding | 30 | GC08M007430 | 5.735948 | <a href="https://www.genecards.org/cgi-bin/carddisp.pl?gene=DEFB103B">https://www.genecards.org/cgi-bin/carddisp.pl?gene=DEFB103B</a> |
| SLC4A7   | Solute Carrier Family 4 Member 7               | Protein Coding | 43 | GC03M027372 | 5.735288 | <a href="https://www.genecards.org/cgi-bin/carddisp.pl?gene=SLC4A7">https://www.genecards.org/cgi-bin/carddisp.pl?gene=SLC4A7</a>     |
| BRD2     | Bromodomain Containing 2                       | Protein Coding | 45 | GC06P055236 | 5.73501  | <a href="https://www.genecards.org/cgi-bin/carddisp.pl?gene=BRD2">https://www.genecards.org/cgi-bin/carddisp.pl?gene=BRD2</a>         |
| GGPS1    | Geranylgeranyl Diphosphate Synthase 1          | Protein Coding | 45 | GC01P235327 | 5.733788 | <a href="https://www.genecards.org/cgi-bin/carddisp.pl?gene=GGPS1">https://www.genecards.org/cgi-bin/carddisp.pl?gene=GGPS1</a>       |
| PPP1CA   | Protein Phosphatase 1 Catalytic Subunit Alpha  | Protein Coding | 49 | GC11M069512 | 5.73245  | <a href="https://www.genecards.org/cgi-bin/carddisp.pl?gene=PPP1CA">https://www.genecards.org/cgi-bin/carddisp.pl?gene=PPP1CA</a>     |
| UBE2N    | Ubiquitin Conjugating Enzyme E2 N              | Protein Coding | 47 | GC12M093406 | 5.730811 | <a href="https://www.genecards.org/cgi-bin/carddisp.pl?gene=UBE2N">https://www.genecards.org/cgi-bin/carddisp.pl?gene=UBE2N</a>       |
| GJD2     | Gap Junction Protein Delta 2                   | Protein Coding | 43 | GC15M034751 | 5.728963 | <a href="https://www.genecards.org/cgi-bin/carddisp.pl?gene=GJD2">https://www.genecards.org/cgi-bin/carddisp.pl?gene=GJD2</a>         |
| MIR20B   | MicroRNA 20b                                   | RNA Gene       | 15 | GC0XM134217 | 5.726795 | <a href="https://www.genecards.org/cgi-bin/carddisp.pl?gene=MIR20B">https://www.genecards.org/cgi-bin/carddisp.pl?gene=MIR20B</a>     |
| PANX1    | Pannexin 1                                     | Protein Coding | 44 | GC11P094128 | 5.713655 | <a href="https://www.genecards.org/cgi-bin/carddisp.pl?gene=PANX1">https://www.genecards.org/cgi-bin/carddisp.pl?gene=PANX1</a>       |
| HS6ST1   | Heparan Sulfate 6-O-Sulfotransferase 1         | Protein Coding | 43 | GC02M128236 | 5.709884 | <a href="https://www.genecards.org/cgi-bin/carddisp.pl?gene=HS6ST1">https://www.genecards.org/cgi-bin/carddisp.pl?gene=HS6ST1</a>     |
| NPY2R    | Neuropeptide Y Receptor Y2 La                  | Protein Coding | 44 | GC04P155173 | 5.705987 | <a href="https://www.genecards.org/cgi-bin/carddisp.pl?gene=NPY2R">https://www.genecards.org/cgi-bin/carddisp.pl?gene=NPY2R</a>       |
| LARP7    | Ribonucleoprotein 7, Transcriptional Regulator | Protein Coding | 42 | GC04P112636 | 5.698277 | <a href="https://www.genecards.org/cgi-bin/carddisp.pl?gene=LARP7">https://www.genecards.org/cgi-bin/carddisp.pl?gene=LARP7</a>       |
| DCT      | Dopachrome Tautomerase                         | Protein Coding | 43 | GC13M094436 | 5.69643  | <a href="https://www.genecards.org/cgi-bin/carddisp.pl?gene=DCT">https://www.genecards.org/cgi-bin/carddisp.pl?gene=DCT</a>           |
| HOXA-AS2 | HOXA Cluster Antisense RNA 2                   | RNA Gene       | 18 | GC07P027107 | 5.695453 | <a href="https://www.genecards.org/cgi-bin/carddisp.pl?gene=HOXA-AS2">https://www.genecards.org/cgi-bin/carddisp.pl?gene=HOXA-AS2</a> |
| RAB6A    | RAB6A, Member RAS Oncogene Family              | Protein Coding | 41 | GC11M073676 | 5.693328 | <a href="https://www.genecards.org/cgi-bin/carddisp.pl?gene=RAB6A">https://www.genecards.org/cgi-bin/carddisp.pl?gene=RAB6A</a>       |
| HIBADH   | 3-Hydroxyisobutyrate Dehydrogenase             | Protein Coding | 42 | GC07M027525 | 5.691217 | <a href="https://www.genecards.org/cgi-bin/carddisp.pl?gene=HIBADH">https://www.genecards.org/cgi-bin/carddisp.pl?gene=HIBADH</a>     |
| ADCY1    | Adenylate Cyclase 1                            | Protein Coding | 49 | GC07P045580 | 5.690069 | <a href="https://www.genecards.org/cgi-bin/carddisp.pl?gene=ADCY1">https://www.genecards.org/cgi-bin/carddisp.pl?gene=ADCY1</a>       |
| NFAT5    | Nuclear Factor Of Activated T Cells 5          | Protein Coding | 43 | GC16P069565 | 5.689214 | <a href="https://www.genecards.org/cgi-bin/carddisp.pl?gene=NFAT5">https://www.genecards.org/cgi-bin/carddisp.pl?gene=NFAT5</a>       |

|         |                                                     |                |    |             |          |                                                                                                                                     |
|---------|-----------------------------------------------------|----------------|----|-------------|----------|-------------------------------------------------------------------------------------------------------------------------------------|
| RNF216  | Ring Finger Protein 216                             | Protein Coding | 43 | GC07M005620 | 5.687888 | <a href="https://www.genecards.org/cgi-bin/carddisp.pl?gene=RNF216">https://www.genecards.org/cgi-bin/carddisp.pl?gene=RNF216</a>   |
| MAPK7   | Mitogen-Activated Protein Kinase 7                  | Protein Coding | 49 | GC17P019379 | 5.687428 | <a href="https://www.genecards.org/cgi-bin/carddisp.pl?gene=MAPK7">https://www.genecards.org/cgi-bin/carddisp.pl?gene=MAPK7</a>     |
| DGCR2   | DiGeorge Syndrome Critical Region Gene 2            | Protein Coding | 40 | GC22M019037 | 5.686914 | <a href="https://www.genecards.org/cgi-bin/carddisp.pl?gene=DGCR2">https://www.genecards.org/cgi-bin/carddisp.pl?gene=DGCR2</a>     |
| AGO2    | Argonaute RISC Catalytic Component 2                | Protein Coding | 41 | GC08M140522 | 5.685075 | <a href="https://www.genecards.org/cgi-bin/carddisp.pl?gene=AGO2">https://www.genecards.org/cgi-bin/carddisp.pl?gene=AGO2</a>       |
| SSRP1   | Structure Specific Recognition Protein 1            | Protein Coding | 41 | GC11M069072 | 5.6831   | <a href="https://www.genecards.org/cgi-bin/carddisp.pl?gene=SSRP1">https://www.genecards.org/cgi-bin/carddisp.pl?gene=SSRP1</a>     |
| CWF19L1 | CWF19 Like Cell Cycle Control Factor 1              | Protein Coding | 39 | GC10M100232 | 5.680615 | <a href="https://www.genecards.org/cgi-bin/carddisp.pl?gene=CWF19L1">https://www.genecards.org/cgi-bin/carddisp.pl?gene=CWF19L1</a> |
| RTN4R   | Reticulon 4 Receptor                                | Protein Coding | 43 | GC22M020241 | 5.679897 | <a href="https://www.genecards.org/cgi-bin/carddisp.pl?gene=RTN4R">https://www.genecards.org/cgi-bin/carddisp.pl?gene=RTN4R</a>     |
| EMSY    | EMSY Transcriptional Repressor, BRCA2 Interacting   | Protein Coding | 33 | GC11P076445 | 5.677684 | <a href="https://www.genecards.org/cgi-bin/carddisp.pl?gene=EMSY">https://www.genecards.org/cgi-bin/carddisp.pl?gene=EMSY</a>       |
| PDE2A   | Phosphodiesterase 2A                                | Protein Coding | 46 | GC11M072576 | 5.6731   | <a href="https://www.genecards.org/cgi-bin/carddisp.pl?gene=PDE2A">https://www.genecards.org/cgi-bin/carddisp.pl?gene=PDE2A</a>     |
| MIR500A | MicroRNA 500a                                       | RNA Gene       | 16 | GC0XP050008 | 5.672725 | <a href="https://www.genecards.org/cgi-bin/carddisp.pl?gene=MIR500A">https://www.genecards.org/cgi-bin/carddisp.pl?gene=MIR500A</a> |
| EMX2    | Empty Spiracles Homeobox 2                          | Protein Coding | 44 | GC10P117542 | 5.669665 | <a href="https://www.genecards.org/cgi-bin/carddisp.pl?gene=EMX2">https://www.genecards.org/cgi-bin/carddisp.pl?gene=EMX2</a>       |
| ACSS1   | Acyl-CoA Synthetase Short Chain Family Member 1     | Protein Coding | 40 | GC20M024986 | 5.665409 | <a href="https://www.genecards.org/cgi-bin/carddisp.pl?gene=ACSS1">https://www.genecards.org/cgi-bin/carddisp.pl?gene=ACSS1</a>     |
| SORCS2  | Sortilin Related VPS10 Domain Containing Receptor 2 | Protein Coding | 36 | GC04P007196 | 5.664694 | <a href="https://www.genecards.org/cgi-bin/carddisp.pl?gene=SORCS2">https://www.genecards.org/cgi-bin/carddisp.pl?gene=SORCS2</a>   |
| LMAN1   | Lectin, Mannose Binding 1                           | Protein Coding | 46 | GC18M059327 | 5.660633 | <a href="https://www.genecards.org/cgi-bin/carddisp.pl?gene=LMAN1">https://www.genecards.org/cgi-bin/carddisp.pl?gene=LMAN1</a>     |
| CYSLTR2 | Cysteinyl Leukotriene Receptor 2                    | Protein Coding | 48 | GC13P048653 | 5.660558 | <a href="https://www.genecards.org/cgi-bin/carddisp.pl?gene=CYSLTR2">https://www.genecards.org/cgi-bin/carddisp.pl?gene=CYSLTR2</a> |
| POLH    | DNA Polymerase Eta                                  | Protein Coding | 49 | GC06P043576 | 5.659925 | <a href="https://www.genecards.org/cgi-bin/carddisp.pl?gene=POLH">https://www.genecards.org/cgi-bin/carddisp.pl?gene=POLH</a>       |
| MYO1A   | Myosin IA                                           | Protein Coding | 40 | GC12M057028 | 5.657652 | <a href="https://www.genecards.org/cgi-bin/carddisp.pl?gene=MYO1A">https://www.genecards.org/cgi-bin/carddisp.pl?gene=MYO1A</a>     |
| FOXN1   | Forkhead Box N1                                     | Protein Coding | 42 | GC17P028506 | 5.657597 | <a href="https://www.genecards.org/cgi-bin/carddisp.pl?gene=FOXN1">https://www.genecards.org/cgi-bin/carddisp.pl?gene=FOXN1</a>     |

|          |                                                      |                   |    |                 |          |                                                                                                                                       |
|----------|------------------------------------------------------|-------------------|----|-----------------|----------|---------------------------------------------------------------------------------------------------------------------------------------|
| BPIFA1   | BPI Fold<br>Containing<br>Family A<br>Member 1       | Protein<br>Coding | 37 | GC20P0332<br>35 | 5.656493 | <a href="https://www.genecards.org/cgi-bin/carddisp.pl?gene=BPIFA1">https://www.genecards.org/cgi-bin/carddisp.pl?gene=BPIFA1</a>     |
| RORB     | RAR Related<br>Orphan<br>Receptor B                  | Protein<br>Coding | 48 | GC09P0744<br>97 | 5.650209 | <a href="https://www.genecards.org/cgi-bin/carddisp.pl?gene=RORB">https://www.genecards.org/cgi-bin/carddisp.pl?gene=RORB</a>         |
| AIM2     | Absent In<br>Melanoma 2<br>Nuclear                   | Protein<br>Coding | 43 | GC01M159<br>062 | 5.648614 | <a href="https://www.genecards.org/cgi-bin/carddisp.pl?gene=AIM2">https://www.genecards.org/cgi-bin/carddisp.pl?gene=AIM2</a>         |
| NR2F1    | Receptor<br>Subfamily 2<br>Group F<br>Member 1       | Protein<br>Coding | 46 | GC05P0935<br>83 | 5.640584 | <a href="https://www.genecards.org/cgi-bin/carddisp.pl?gene=NR2F1">https://www.genecards.org/cgi-bin/carddisp.pl?gene=NR2F1</a>       |
| HNRNPM   | Heterogeneous<br>Nuclear<br>Ribonucleoprotein M      | Protein<br>Coding | 40 | GC19P0084<br>44 | 5.631485 | <a href="https://www.genecards.org/cgi-bin/carddisp.pl?gene=HNRNPM">https://www.genecards.org/cgi-bin/carddisp.pl?gene=HNRNPM</a>     |
| INHBA    | Inhibin Subunit<br>Beta A                            | Protein<br>Coding | 45 | GC07M041<br>668 | 5.630105 | <a href="https://www.genecards.org/cgi-bin/carddisp.pl?gene=INHBA">https://www.genecards.org/cgi-bin/carddisp.pl?gene=INHBA</a>       |
| SPEN     | Spen Family<br>Transcriptional<br>Repressor          | Protein<br>Coding | 38 | GC01P0158<br>48 | 5.609621 | <a href="https://www.genecards.org/cgi-bin/carddisp.pl?gene=SPEN">https://www.genecards.org/cgi-bin/carddisp.pl?gene=SPEN</a>         |
| NDUFB7   | NADH:Ubiquinone<br>Oxidoreductase<br>Subunit B7      | Protein<br>Coding | 40 | GC19M014<br>566 | 5.60186  | <a href="https://www.genecards.org/cgi-bin/carddisp.pl?gene=NDUFB7">https://www.genecards.org/cgi-bin/carddisp.pl?gene=NDUFB7</a>     |
| EFS      | Embryonal<br>Fyn-Associated<br>Substrate             | Protein<br>Coding | 36 | GC14M023<br>356 | 5.595194 | <a href="https://www.genecards.org/cgi-bin/carddisp.pl?gene=EFS">https://www.genecards.org/cgi-bin/carddisp.pl?gene=EFS</a>           |
| ING3     | Inhibitor Of<br>Growth Family<br>Member 3            | Protein<br>Coding | 40 | GC07P1209<br>50 | 5.594891 | <a href="https://www.genecards.org/cgi-bin/carddisp.pl?gene=ING3">https://www.genecards.org/cgi-bin/carddisp.pl?gene=ING3</a>         |
| NUDT4    | Nudix<br>Hydrolase 4<br>Nuclear                      | Protein<br>Coding | 40 | GC12P0933<br>92 | 5.590994 | <a href="https://www.genecards.org/cgi-bin/carddisp.pl?gene=NUDT4">https://www.genecards.org/cgi-bin/carddisp.pl?gene=NUDT4</a>       |
| NR2C2    | Receptor<br>Subfamily 2<br>Group C<br>Member 2       | Protein<br>Coding | 45 | GC03P0149<br>47 | 5.587327 | <a href="https://www.genecards.org/cgi-bin/carddisp.pl?gene=NR2C2">https://www.genecards.org/cgi-bin/carddisp.pl?gene=NR2C2</a>       |
| CPLANE2  | Ciliogenesis<br>And Planar<br>Polarity Effector<br>2 | Protein<br>Coding | 25 | GC01M016<br>232 | 5.583817 | <a href="https://www.genecards.org/cgi-bin/carddisp.pl?gene=CPLANE2">https://www.genecards.org/cgi-bin/carddisp.pl?gene=CPLANE2</a>   |
| HSD17B11 | Hydroxysteroid<br>17-Beta<br>Dehydrogenase<br>11     | Protein<br>Coding | 41 | GC04M087<br>336 | 5.576313 | <a href="https://www.genecards.org/cgi-bin/carddisp.pl?gene=HSD17B11">https://www.genecards.org/cgi-bin/carddisp.pl?gene=HSD17B11</a> |
| GDF3     | Growth<br>Differentiation<br>Factor 3                | Protein<br>Coding | 41 | GC12M007<br>689 | 5.574468 | <a href="https://www.genecards.org/cgi-bin/carddisp.pl?gene=GDF3">https://www.genecards.org/cgi-bin/carddisp.pl?gene=GDF3</a>         |
| EHBP1L1  | EH Domain<br>Binding Protein<br>1 Like 1             | Protein<br>Coding | 32 | GC11P0662<br>31 | 5.569793 | <a href="https://www.genecards.org/cgi-bin/carddisp.pl?gene=EHBP1L1">https://www.genecards.org/cgi-bin/carddisp.pl?gene=EHBP1L1</a>   |
| CNDP2    | Carnosine<br>Dipeptidase 2                           | Protein<br>Coding | 44 | GC18P0744<br>95 | 5.569459 | <a href="https://www.genecards.org/cgi-bin/carddisp.pl?gene=CNDP2">https://www.genecards.org/cgi-bin/carddisp.pl?gene=CNDP2</a>       |

|         |                                                              |                |    |             |          |                                                                                                                                     |
|---------|--------------------------------------------------------------|----------------|----|-------------|----------|-------------------------------------------------------------------------------------------------------------------------------------|
| IL13RA2 | Interleukin 13 Receptor Subunit Alpha 2                      | Protein Coding | 41 | GC0XM115003 | 5.568297 | <a href="https://www.genecards.org/cgi-bin/carddisp.pl?gene=IL13RA2">https://www.genecards.org/cgi-bin/carddisp.pl?gene=IL13RA2</a> |
| ESM1    | Endothelial Cell Specific Molecule 1                         | Protein Coding | 40 | GC05M054977 | 5.567933 | <a href="https://www.genecards.org/cgi-bin/carddisp.pl?gene=ESM1">https://www.genecards.org/cgi-bin/carddisp.pl?gene=ESM1</a>       |
| CBX5    | Chromobox 5                                                  | Protein Coding | 45 | GC12M054230 | 5.563202 | <a href="https://www.genecards.org/cgi-bin/carddisp.pl?gene=CBX5">https://www.genecards.org/cgi-bin/carddisp.pl?gene=CBX5</a>       |
| GRHL2   | Grainyhead Like Transcription Factor 2                       | Protein Coding | 41 | GC08P101492 | 5.555061 | <a href="https://www.genecards.org/cgi-bin/carddisp.pl?gene=GRHL2">https://www.genecards.org/cgi-bin/carddisp.pl?gene=GRHL2</a>     |
| AEBP1   | AE Binding Protein 1                                         | Protein Coding | 41 | GC07P044106 | 5.553801 | <a href="https://www.genecards.org/cgi-bin/carddisp.pl?gene=AEBP1">https://www.genecards.org/cgi-bin/carddisp.pl?gene=AEBP1</a>     |
| CCL24   | C-C Motif Chemokine Ligand 24                                | Protein Coding | 37 | GC07M075815 | 5.551489 | <a href="https://www.genecards.org/cgi-bin/carddisp.pl?gene=CCL24">https://www.genecards.org/cgi-bin/carddisp.pl?gene=CCL24</a>     |
| NNT-AS1 | NNT Antisense RNA 1                                          | RNA Gene       | 14 | GC05M043741 | 5.5483   | <a href="https://www.genecards.org/cgi-bin/carddisp.pl?gene=NNT-AS1">https://www.genecards.org/cgi-bin/carddisp.pl?gene=NNT-AS1</a> |
| HGS     | Hepatocyte Growth Factor-Regulated Tyrosine Kinase Substrate | Protein Coding | 45 | GC17P081683 | 5.548202 | <a href="https://www.genecards.org/cgi-bin/carddisp.pl?gene=HGS">https://www.genecards.org/cgi-bin/carddisp.pl?gene=HGS</a>         |
| NANS    | N-Acetylneuraminase Synthase ADAM                            | Protein Coding | 45 | GC09P098056 | 5.546607 | <a href="https://www.genecards.org/cgi-bin/carddisp.pl?gene=NANS">https://www.genecards.org/cgi-bin/carddisp.pl?gene=NANS</a>       |
| ADAMTS1 | ADAM Metalloproteinase With Thrombospondin Type 1 Motif 1    | Protein Coding | 45 | GC21M026835 | 5.544445 | <a href="https://www.genecards.org/cgi-bin/carddisp.pl?gene=ADAMTS1">https://www.genecards.org/cgi-bin/carddisp.pl?gene=ADAMTS1</a> |
| MYL1    | Myosin Light Chain 1                                         | Protein Coding | 43 | GC02M210290 | 5.541769 | <a href="https://www.genecards.org/cgi-bin/carddisp.pl?gene=MYL1">https://www.genecards.org/cgi-bin/carddisp.pl?gene=MYL1</a>       |
| RGS4    | Regulator Of G Protein Signaling 4                           | Protein Coding | 44 | GC01P163038 | 5.540104 | <a href="https://www.genecards.org/cgi-bin/carddisp.pl?gene=RGS4">https://www.genecards.org/cgi-bin/carddisp.pl?gene=RGS4</a>       |
| IGFBP6  | Insulin Like Growth Factor Binding Protein 6                 | Protein Coding | 43 | GC12P053097 | 5.538567 | <a href="https://www.genecards.org/cgi-bin/carddisp.pl?gene=IGFBP6">https://www.genecards.org/cgi-bin/carddisp.pl?gene=IGFBP6</a>   |
| TCF12   | Transcription Factor 12                                      | Protein Coding | 47 | GC15P056918 | 5.535733 | <a href="https://www.genecards.org/cgi-bin/carddisp.pl?gene=TCF12">https://www.genecards.org/cgi-bin/carddisp.pl?gene=TCF12</a>     |
| RPL10A  | Ribosomal Protein L10a                                       | Protein Coding | 43 | GC06P055328 | 5.527932 | <a href="https://www.genecards.org/cgi-bin/carddisp.pl?gene=RPL10A">https://www.genecards.org/cgi-bin/carddisp.pl?gene=RPL10A</a>   |
| NUDT1   | Nudix Hydrolase 1                                            | Protein Coding | 44 | GC07P002242 | 5.527001 | <a href="https://www.genecards.org/cgi-bin/carddisp.pl?gene=NUDT1">https://www.genecards.org/cgi-bin/carddisp.pl?gene=NUDT1</a>     |
| IGFBP4  | Insulin Like Growth Factor Binding Protein 4                 | Protein Coding | 43 | GC17P040443 | 5.526307 | <a href="https://www.genecards.org/cgi-bin/carddisp.pl?gene=IGFBP4">https://www.genecards.org/cgi-bin/carddisp.pl?gene=IGFBP4</a>   |
| ACER2   | Alkaline Ceramidase 2                                        | Protein Coding | 37 | GC09P019408 | 5.523192 | <a href="https://www.genecards.org/cgi-bin/carddisp.pl?gene=ACER2">https://www.genecards.org/cgi-bin/carddisp.pl?gene=ACER2</a>     |

|          |                                                                             |                |    |             |          |                                                                                                                                       |
|----------|-----------------------------------------------------------------------------|----------------|----|-------------|----------|---------------------------------------------------------------------------------------------------------------------------------------|
| FARP1    | FERM, ARH/RhoGEF And Pleckstrin Domain Protein 1                            | Protein Coding | 38 | GC13P098142 | 5.523026 | <a href="https://www.genecards.org/cgi-bin/carddisp.pl?gene=FARP1">https://www.genecards.org/cgi-bin/carddisp.pl?gene=FARP1</a>       |
| NCL      | Nucleolin                                                                   | Protein Coding | 43 | GC02M231453 | 5.522409 | <a href="https://www.genecards.org/cgi-bin/carddisp.pl?gene=NCL">https://www.genecards.org/cgi-bin/carddisp.pl?gene=NCL</a>           |
| VPS13D   | Vacuolar Protein Sorting 13 Homolog D                                       | Protein Coding | 34 | GC01P012231 | 5.520661 | <a href="https://www.genecards.org/cgi-bin/carddisp.pl?gene=VPS13D">https://www.genecards.org/cgi-bin/carddisp.pl?gene=VPS13D</a>     |
| UBE2G2   | Ubiquitin Conjugating Enzyme E2 G2                                          | Protein Coding | 45 | GC21M044768 | 5.51684  | <a href="https://www.genecards.org/cgi-bin/carddisp.pl?gene=UBE2G2">https://www.genecards.org/cgi-bin/carddisp.pl?gene=UBE2G2</a>     |
| P2RY2    | Purinergic Receptor P2Y2                                                    | Protein Coding | 47 | GC11P073202 | 5.513649 | <a href="https://www.genecards.org/cgi-bin/carddisp.pl?gene=P2RY2">https://www.genecards.org/cgi-bin/carddisp.pl?gene=P2RY2</a>       |
| H2AC20   | H2A Clustered Histone 20                                                    | Protein Coding | 31 | GC01P149978 | 5.510845 | <a href="https://www.genecards.org/cgi-bin/carddisp.pl?gene=H2AC20">https://www.genecards.org/cgi-bin/carddisp.pl?gene=H2AC20</a>     |
| ID1      | Inhibitor Of DNA Binding 1, HLH Protein                                     | Protein Coding | 44 | GC20P031605 | 5.510283 | <a href="https://www.genecards.org/cgi-bin/carddisp.pl?gene=ID1">https://www.genecards.org/cgi-bin/carddisp.pl?gene=ID1</a>           |
| MIR409   | MicroRNA 409                                                                | RNA Gene       | 18 | GC14P106324 | 5.501606 | <a href="https://www.genecards.org/cgi-bin/carddisp.pl?gene=MIR409">https://www.genecards.org/cgi-bin/carddisp.pl?gene=MIR409</a>     |
| CTPS1    | CTP Synthase 1                                                              | Protein Coding | 45 | GC01P040979 | 5.500762 | <a href="https://www.genecards.org/cgi-bin/carddisp.pl?gene=CTPS1">https://www.genecards.org/cgi-bin/carddisp.pl?gene=CTPS1</a>       |
| SLC17A1  | Solute Carrier Family 17 Member 1                                           | Protein Coding | 40 | GC06M025723 | 5.49742  | <a href="https://www.genecards.org/cgi-bin/carddisp.pl?gene=SLC17A1">https://www.genecards.org/cgi-bin/carddisp.pl?gene=SLC17A1</a>   |
| ENPP7    | Ectonucleotide Pyrophosphatase/Phosphodiesterase 7                          | Protein Coding | 38 | GC17P079730 | 5.491338 | <a href="https://www.genecards.org/cgi-bin/carddisp.pl?gene=ENPP7">https://www.genecards.org/cgi-bin/carddisp.pl?gene=ENPP7</a>       |
| FRK      | Fyn Related Src Family Tyrosine Kinase                                      | Protein Coding | 45 | GC06M115931 | 5.490207 | <a href="https://www.genecards.org/cgi-bin/carddisp.pl?gene=FRK">https://www.genecards.org/cgi-bin/carddisp.pl?gene=FRK</a>           |
| NUP155   | Nucleoporin 155                                                             | Protein Coding | 45 | GC05M037288 | 5.48787  | <a href="https://www.genecards.org/cgi-bin/carddisp.pl?gene=NUP155">https://www.genecards.org/cgi-bin/carddisp.pl?gene=NUP155</a>     |
| PSMD7    | Proteasome 26S Subunit, Non-ATPase 7                                        | Protein Coding | 44 | GC16P074296 | 5.485281 | <a href="https://www.genecards.org/cgi-bin/carddisp.pl?gene=PSMD7">https://www.genecards.org/cgi-bin/carddisp.pl?gene=PSMD7</a>       |
| YWHAZ    | Tyrosine 3-Monooxygenase/Tryptophan 5-Monooxygenase Activation Protein Zeta | Protein Coding | 48 | GC08M100917 | 5.480808 | <a href="https://www.genecards.org/cgi-bin/carddisp.pl?gene=YWHAZ">https://www.genecards.org/cgi-bin/carddisp.pl?gene=YWHAZ</a>       |
| PLA2G12A | Phospholipase A2 Group XIIA                                                 | Protein Coding | 42 | GC04M109712 | 5.473032 | <a href="https://www.genecards.org/cgi-bin/carddisp.pl?gene=PLA2G12A">https://www.genecards.org/cgi-bin/carddisp.pl?gene=PLA2G12A</a> |
| GNB5     | G Protein Subunit Beta 5                                                    | Protein Coding | 45 | GC15M067468 | 5.466584 | <a href="https://www.genecards.org/cgi-bin/carddisp.pl?gene=GNB5">https://www.genecards.org/cgi-bin/carddisp.pl?gene=GNB5</a>         |
| CLDN4    | Claudin 4                                                                   | Protein Coding | 42 | GC07P073799 | 5.464571 | <a href="https://www.genecards.org/cgi-bin/carddisp.pl?gene=CLDN4">https://www.genecards.org/cgi-bin/carddisp.pl?gene=CLDN4</a>       |
| URGCP    | Upregulator Of Cell Proliferation                                           | Protein Coding | 34 | GC07M043876 | 5.455553 | <a href="https://www.genecards.org/cgi-bin/carddisp.pl?gene=URGCP">https://www.genecards.org/cgi-bin/carddisp.pl?gene=URGCP</a>       |

|           |                                                         |                |    |             |          |                                                                                                                                         |
|-----------|---------------------------------------------------------|----------------|----|-------------|----------|-----------------------------------------------------------------------------------------------------------------------------------------|
| GRM4      | Glutamate Metabotropic Receptor 4                       | Protein Coding | 45 | GC06M047013 | 5.453603 | <a href="https://www.genecards.org/cgi-bin/carddisp.pl?gene=GRM4">https://www.genecards.org/cgi-bin/carddisp.pl?gene=GRM4</a>           |
| ME1       | Malic Enzyme 1                                          | Protein Coding | 43 | GC06M083210 | 5.449981 | <a href="https://www.genecards.org/cgi-bin/carddisp.pl?gene=ME1">https://www.genecards.org/cgi-bin/carddisp.pl?gene=ME1</a>             |
| GJC3      | Gap Junction Protein Gamma 3                            | Protein Coding | 40 | GC07M099923 | 5.445215 | <a href="https://www.genecards.org/cgi-bin/carddisp.pl?gene=GJC3">https://www.genecards.org/cgi-bin/carddisp.pl?gene=GJC3</a>           |
| TSBP1-AS1 | TSBP1 And BTNL2 Antisense RNA 1                         | RNA Gene       | 9  | GC06P058058 | 5.443883 | <a href="https://www.genecards.org/cgi-bin/carddisp.pl?gene=TSBP1-AS1">https://www.genecards.org/cgi-bin/carddisp.pl?gene=TSBP1-AS1</a> |
| UQCR10    | Ubiquinol-Cytochrome C Reductase, Complex III Subunit X | Protein Coding | 40 | GC22P029767 | 5.443162 | <a href="https://www.genecards.org/cgi-bin/carddisp.pl?gene=UQCR10">https://www.genecards.org/cgi-bin/carddisp.pl?gene=UQCR10</a>       |
| IL1RAP    | Interleukin 1 Receptor Accessory Protein                | Protein Coding | 44 | GC03P190514 | 5.442783 | <a href="https://www.genecards.org/cgi-bin/carddisp.pl?gene=IL1RAP">https://www.genecards.org/cgi-bin/carddisp.pl?gene=IL1RAP</a>       |
| S100A10   | S100 Calcium Binding Protein A10                        | Protein Coding | 45 | GC01M151955 | 5.439061 | <a href="https://www.genecards.org/cgi-bin/carddisp.pl?gene=S100A10">https://www.genecards.org/cgi-bin/carddisp.pl?gene=S100A10</a>     |
| CPSF6     | Cleavage And Polyadenylation Specific Factor 6          | Protein Coding | 40 | GC12P069239 | 5.438096 | <a href="https://www.genecards.org/cgi-bin/carddisp.pl?gene=CPSF6">https://www.genecards.org/cgi-bin/carddisp.pl?gene=CPSF6</a>         |
| IL32      | Interleukin 32                                          | Protein Coding | 40 | GC16P005617 | 5.431749 | <a href="https://www.genecards.org/cgi-bin/carddisp.pl?gene=IL32">https://www.genecards.org/cgi-bin/carddisp.pl?gene=IL32</a>           |
| CNTN5     | Contactin 5                                             | Protein Coding | 37 | GC11P099020 | 5.429941 | <a href="https://www.genecards.org/cgi-bin/carddisp.pl?gene=CNTN5">https://www.genecards.org/cgi-bin/carddisp.pl?gene=CNTN5</a>         |
| TRA2B     | Transformer 2 Beta Homolog CAMP                         | Protein Coding | 40 | GC03M185914 | 5.42932  | <a href="https://www.genecards.org/cgi-bin/carddisp.pl?gene=TRA2B">https://www.genecards.org/cgi-bin/carddisp.pl?gene=TRA2B</a>         |
| CREB3     | Responsive Element Binding Protein 3                    | Protein Coding | 39 | GC09P035960 | 5.421911 | <a href="https://www.genecards.org/cgi-bin/carddisp.pl?gene=CREB3">https://www.genecards.org/cgi-bin/carddisp.pl?gene=CREB3</a>         |
| CLDN7     | Claudin 7                                               | Protein Coding | 42 | GC17M007259 | 5.421853 | <a href="https://www.genecards.org/cgi-bin/carddisp.pl?gene=CLDN7">https://www.genecards.org/cgi-bin/carddisp.pl?gene=CLDN7</a>         |
| LAPTM4A   | Lysosomal Protein Transmembrane 4 Alpha                 | Protein Coding | 38 | GC02M020032 | 5.418144 | <a href="https://www.genecards.org/cgi-bin/carddisp.pl?gene=LAPTM4A">https://www.genecards.org/cgi-bin/carddisp.pl?gene=LAPTM4A</a>     |
| MIR497    | MicroRNA 497                                            | RNA Gene       | 18 | GC17M007022 | 5.416584 | <a href="https://www.genecards.org/cgi-bin/carddisp.pl?gene=MIR497">https://www.genecards.org/cgi-bin/carddisp.pl?gene=MIR497</a>       |
| NAGK      | N-Acetylglucosamine Kinase                              | Protein Coding | 44 | GC02P071064 | 5.416053 | <a href="https://www.genecards.org/cgi-bin/carddisp.pl?gene=NAGK">https://www.genecards.org/cgi-bin/carddisp.pl?gene=NAGK</a>           |
| CD276     | CD276 Molecule                                          | Protein Coding | 40 | GC15P073683 | 5.408948 | <a href="https://www.genecards.org/cgi-bin/carddisp.pl?gene=CD276">https://www.genecards.org/cgi-bin/carddisp.pl?gene=CD276</a>         |
| MIRLET7F2 | MicroRNA Let-7f-2                                       | RNA Gene       | 18 | GC0XM053596 | 5.407678 | <a href="https://www.genecards.org/cgi-bin/carddisp.pl?gene=MIRLET7F2">https://www.genecards.org/cgi-bin/carddisp.pl?gene=MIRLET7F2</a> |

|          |                                                |                |    |             |          |                                                                                                                                       |
|----------|------------------------------------------------|----------------|----|-------------|----------|---------------------------------------------------------------------------------------------------------------------------------------|
| ORC1     | Origin Recognition Complex Subunit 1           | Protein Coding | 44 | GC01M052372 | 5.406778 | <a href="https://www.genecards.org/cgi-bin/carddisp.pl?gene=ORC1">https://www.genecards.org/cgi-bin/carddisp.pl?gene=ORC1</a>         |
| FAF2     | Fas Associated Factor Family Member 2          | Protein Coding | 38 | GC05P176447 | 5.404696 | <a href="https://www.genecards.org/cgi-bin/carddisp.pl?gene=FAF2">https://www.genecards.org/cgi-bin/carddisp.pl?gene=FAF2</a>         |
| TOLLIP   | Toll Interacting Protein                       | Protein Coding | 44 | GC11M001274 | 5.40376  | <a href="https://www.genecards.org/cgi-bin/carddisp.pl?gene=TOLLIP">https://www.genecards.org/cgi-bin/carddisp.pl?gene=TOLLIP</a>     |
| MDH1     | Malate Dehydrogenase 1                         | Protein Coding | 47 | GC02P063557 | 5.403732 | <a href="https://www.genecards.org/cgi-bin/carddisp.pl?gene=MDH1">https://www.genecards.org/cgi-bin/carddisp.pl?gene=MDH1</a>         |
| PTPRU    | Protein Tyrosine Phosphatase Receptor Type U   | Protein Coding | 43 | GC01P029236 | 5.398726 | <a href="https://www.genecards.org/cgi-bin/carddisp.pl?gene=PTPRU">https://www.genecards.org/cgi-bin/carddisp.pl?gene=PTPRU</a>       |
| GGH      | Gamma-Glutamyl Hydrolase                       | Protein Coding | 44 | GC08M063015 | 5.397708 | <a href="https://www.genecards.org/cgi-bin/carddisp.pl?gene=GGH">https://www.genecards.org/cgi-bin/carddisp.pl?gene=GGH</a>           |
| CDK7     | Cyclin Dependent Kinase 7                      | Protein Coding | 47 | GC05P069263 | 5.396034 | <a href="https://www.genecards.org/cgi-bin/carddisp.pl?gene=CDK7">https://www.genecards.org/cgi-bin/carddisp.pl?gene=CDK7</a>         |
| SEC24B   | SEC24 Homolog B, COPII Coat Complex Component  | Protein Coding | 40 | GC04P109433 | 5.395859 | <a href="https://www.genecards.org/cgi-bin/carddisp.pl?gene=SEC24B">https://www.genecards.org/cgi-bin/carddisp.pl?gene=SEC24B</a>     |
| BCORL1   | BCL6 Corepressor Like 1                        | Protein Coding | 35 | GC0XP129980 | 5.395348 | <a href="https://www.genecards.org/cgi-bin/carddisp.pl?gene=BCORL1">https://www.genecards.org/cgi-bin/carddisp.pl?gene=BCORL1</a>     |
| ZIC1     | Zic Family Member 1                            | Protein Coding | 46 | GC03P147393 | 5.393857 | <a href="https://www.genecards.org/cgi-bin/carddisp.pl?gene=ZIC1">https://www.genecards.org/cgi-bin/carddisp.pl?gene=ZIC1</a>         |
| ATCAY    | ATCAY Kinesin Light Chain Interacting Caytaxin | Protein Coding | 38 | GC19P003880 | 5.388311 | <a href="https://www.genecards.org/cgi-bin/carddisp.pl?gene=ATCAY">https://www.genecards.org/cgi-bin/carddisp.pl?gene=ATCAY</a>       |
| SLC25A32 | Solute Carrier Family 25 Member 32             | Protein Coding | 41 | GC08M103398 | 5.387505 | <a href="https://www.genecards.org/cgi-bin/carddisp.pl?gene=SLC25A32">https://www.genecards.org/cgi-bin/carddisp.pl?gene=SLC25A32</a> |
| MCM5     | Minichromosome Maintenance Complex Component 5 | Protein Coding | 46 | GC22P035400 | 5.386617 | <a href="https://www.genecards.org/cgi-bin/carddisp.pl?gene=MCM5">https://www.genecards.org/cgi-bin/carddisp.pl?gene=MCM5</a>         |
| RPL3     | Ribosomal Protein L3                           | Protein Coding | 42 | GC22M048526 | 5.386133 | <a href="https://www.genecards.org/cgi-bin/carddisp.pl?gene=RPL3">https://www.genecards.org/cgi-bin/carddisp.pl?gene=RPL3</a>         |
| HTR4     | 5-Hydroxytryptamine Receptor 4                 | Protein Coding | 45 | GC05M148451 | 5.383527 | <a href="https://www.genecards.org/cgi-bin/carddisp.pl?gene=HTR4">https://www.genecards.org/cgi-bin/carddisp.pl?gene=HTR4</a>         |
| DDIT4    | DNA Damage Inducible Transcript 4              | Protein Coding | 44 | GC10P072273 | 5.382831 | <a href="https://www.genecards.org/cgi-bin/carddisp.pl?gene=DDIT4">https://www.genecards.org/cgi-bin/carddisp.pl?gene=DDIT4</a>       |
| CCL13    | C-C Motif Chemokine Ligand 13                  | Protein Coding | 38 | GC17P034356 | 5.382045 | <a href="https://www.genecards.org/cgi-bin/carddisp.pl?gene=CCL13">https://www.genecards.org/cgi-bin/carddisp.pl?gene=CCL13</a>       |



|          |                                                            |                |    |             |          |                                                                                                                                       |
|----------|------------------------------------------------------------|----------------|----|-------------|----------|---------------------------------------------------------------------------------------------------------------------------------------|
| NIN      | Ninein                                                     | Protein Coding | 43 | GC14M050719 | 5.380236 | <a href="https://www.genecards.org/cgi-bin/carddisp.pl?gene=NIN">https://www.genecards.org/cgi-bin/carddisp.pl?gene=NIN</a>           |
| SENP7    | SUMO Specific Peptidase 7                                  | Protein Coding | 37 | GC03M101324 | 5.376885 | <a href="https://www.genecards.org/cgi-bin/carddisp.pl?gene=SENP7">https://www.genecards.org/cgi-bin/carddisp.pl?gene=SENP7</a>       |
| PRKAG3   | Protein Kinase AMP-Activated Non-Catalytic Subunit Gamma 3 | Protein Coding | 44 | GC02M218823 | 5.376197 | <a href="https://www.genecards.org/cgi-bin/carddisp.pl?gene=PRKAG3">https://www.genecards.org/cgi-bin/carddisp.pl?gene=PRKAG3</a>     |
| CCT7     | Chaperonin Containing TCP1 Subunit 7                       | Protein Coding | 41 | GC02P073233 | 5.373137 | <a href="https://www.genecards.org/cgi-bin/carddisp.pl?gene=CCT7">https://www.genecards.org/cgi-bin/carddisp.pl?gene=CCT7</a>         |
| COX5B    | Cytochrome C Oxidase Subunit 5B                            | Protein Coding | 42 | GC02P097628 | 5.372967 | <a href="https://www.genecards.org/cgi-bin/carddisp.pl?gene=COX5B">https://www.genecards.org/cgi-bin/carddisp.pl?gene=COX5B</a>       |
| CTSS     | Cathepsin S                                                | Protein Coding | 46 | GC01M150730 | 5.369229 | <a href="https://www.genecards.org/cgi-bin/carddisp.pl?gene=CTSS">https://www.genecards.org/cgi-bin/carddisp.pl?gene=CTSS</a>         |
| DEK      | DEK Proto-Oncogene Ribosomal                               | Protein Coding | 41 | GC06M018224 | 5.353565 | <a href="https://www.genecards.org/cgi-bin/carddisp.pl?gene=DEK">https://www.genecards.org/cgi-bin/carddisp.pl?gene=DEK</a>           |
| RPLP1    | Protein Lateral Stalk Subunit P1                           | Protein Coding | 41 | GC15P077111 | 5.348802 | <a href="https://www.genecards.org/cgi-bin/carddisp.pl?gene=RPLP1">https://www.genecards.org/cgi-bin/carddisp.pl?gene=RPLP1</a>       |
| HRH3     | Histamine Receptor H3 Protein                              | Protein Coding | 43 | GC20M062214 | 5.346373 | <a href="https://www.genecards.org/cgi-bin/carddisp.pl?gene=HRH3">https://www.genecards.org/cgi-bin/carddisp.pl?gene=HRH3</a>         |
| PPP1R15B | Phosphatase 1 Regulatory Subunit 15B                       | Protein Coding | 38 | GC01M204400 | 5.345397 | <a href="https://www.genecards.org/cgi-bin/carddisp.pl?gene=PPP1R15B">https://www.genecards.org/cgi-bin/carddisp.pl?gene=PPP1R15B</a> |
| FBXO32   | F-Box Protein 32                                           | Protein Coding | 41 | GC08M123498 | 5.343992 | <a href="https://www.genecards.org/cgi-bin/carddisp.pl?gene=FBXO32">https://www.genecards.org/cgi-bin/carddisp.pl?gene=FBXO32</a>     |
| GDF9     | Growth Differentiation Factor 9 Gamma-                     | Protein Coding | 40 | GC05M132861 | 5.343338 | <a href="https://www.genecards.org/cgi-bin/carddisp.pl?gene=GDF9">https://www.genecards.org/cgi-bin/carddisp.pl?gene=GDF9</a>         |
| GGT3P    | Glutamyltransferase 3 Pseudogene                           | Pseudogene     | 18 | GC22M018773 | 5.342343 | <a href="https://www.genecards.org/cgi-bin/carddisp.pl?gene=GGT3P">https://www.genecards.org/cgi-bin/carddisp.pl?gene=GGT3P</a>       |
| NEGR1    | Neuronal Growth Regulator 1 Myocardin                      | Protein Coding | 40 | GC01M071395 | 5.337886 | <a href="https://www.genecards.org/cgi-bin/carddisp.pl?gene=NEGR1">https://www.genecards.org/cgi-bin/carddisp.pl?gene=NEGR1</a>       |
| MRTFA    | Related Transcription Factor A                             | Protein Coding | 35 | GC22M049024 | 5.33699  | <a href="https://www.genecards.org/cgi-bin/carddisp.pl?gene=MRTFA">https://www.genecards.org/cgi-bin/carddisp.pl?gene=MRTFA</a>       |
| CHDH     | Choline Dehydrogenase                                      | Protein Coding | 41 | GC03M053812 | 5.330841 | <a href="https://www.genecards.org/cgi-bin/carddisp.pl?gene=CHDH">https://www.genecards.org/cgi-bin/carddisp.pl?gene=CHDH</a>         |
| HNRNPA3  | Heterogeneous Nuclear Ribonucleoprotein A3                 | Protein Coding | 38 | GC02P177212 | 5.330005 | <a href="https://www.genecards.org/cgi-bin/carddisp.pl?gene=HNRNPA3">https://www.genecards.org/cgi-bin/carddisp.pl?gene=HNRNPA3</a>   |
| KPTN     | Kaptein, Actin Binding Protein                             | Protein Coding | 37 | GC19M047475 | 5.329216 | <a href="https://www.genecards.org/cgi-bin/carddisp.pl?gene=KPTN">https://www.genecards.org/cgi-bin/carddisp.pl?gene=KPTN</a>         |

|          |                                                        |                |    |             |          |                                                                                                                                       |
|----------|--------------------------------------------------------|----------------|----|-------------|----------|---------------------------------------------------------------------------------------------------------------------------------------|
| RPL30    | Ribosomal Protein L30                                  | Protein Coding | 41 | GC08M098024 | 5.327885 | <a href="https://www.genecards.org/cgi-bin/carddisp.pl?gene=RPL30">https://www.genecards.org/cgi-bin/carddisp.pl?gene=RPL30</a>       |
| RPS23    | Ribosomal Protein S23                                  | Protein Coding | 41 | GC05M082273 | 5.326473 | <a href="https://www.genecards.org/cgi-bin/carddisp.pl?gene=RPS23">https://www.genecards.org/cgi-bin/carddisp.pl?gene=RPS23</a>       |
| ZNF462   | Zinc Finger Protein 462                                | Protein Coding | 40 | GC09P106860 | 5.326409 | <a href="https://www.genecards.org/cgi-bin/carddisp.pl?gene=ZNF462">https://www.genecards.org/cgi-bin/carddisp.pl?gene=ZNF462</a>     |
| DIAPH1   | Diaphanous Related Formin 1                            | Protein Coding | 48 | GC05M141516 | 5.325309 | <a href="https://www.genecards.org/cgi-bin/carddisp.pl?gene=DIAPH1">https://www.genecards.org/cgi-bin/carddisp.pl?gene=DIAPH1</a>     |
| SGO1     | Shugoshin 1                                            | Protein Coding | 35 | GC03M020159 | 5.324475 | <a href="https://www.genecards.org/cgi-bin/carddisp.pl?gene=SGO1">https://www.genecards.org/cgi-bin/carddisp.pl?gene=SGO1</a>         |
| CCNG1    | Cyclin G1                                              | Protein Coding | 43 | GC05P163438 | 5.324472 | <a href="https://www.genecards.org/cgi-bin/carddisp.pl?gene=CCNG1">https://www.genecards.org/cgi-bin/carddisp.pl?gene=CCNG1</a>       |
| CLASRP   | CLK4<br>Associating Serine/Arginine Rich Protein       | Protein Coding | 33 | GC19P045039 | 5.322005 | <a href="https://www.genecards.org/cgi-bin/carddisp.pl?gene=CLASRP">https://www.genecards.org/cgi-bin/carddisp.pl?gene=CLASRP</a>     |
| PAEP     | Progestagen Associated Endometrial Protein             | Protein Coding | 40 | GC09P135561 | 5.31604  | <a href="https://www.genecards.org/cgi-bin/carddisp.pl?gene=PAEP">https://www.genecards.org/cgi-bin/carddisp.pl?gene=PAEP</a>         |
| ASXL2    | ASXL Transcriptional Regulator 2                       | Protein Coding | 38 | GC02M025733 | 5.315167 | <a href="https://www.genecards.org/cgi-bin/carddisp.pl?gene=ASXL2">https://www.genecards.org/cgi-bin/carddisp.pl?gene=ASXL2</a>       |
| ITGA5    | Integrin Subunit Alpha 5                               | Protein Coding | 49 | GC12M054398 | 5.312746 | <a href="https://www.genecards.org/cgi-bin/carddisp.pl?gene=ITGA5">https://www.genecards.org/cgi-bin/carddisp.pl?gene=ITGA5</a>       |
| ANGPTL6  | Angiopoietin Like 6                                    | Protein Coding | 40 | GC19M010092 | 5.31098  | <a href="https://www.genecards.org/cgi-bin/carddisp.pl?gene=ANGPTL6">https://www.genecards.org/cgi-bin/carddisp.pl?gene=ANGPTL6</a>   |
| TAB1     | TGF-Beta Activated Kinase 1 (MAP3K7) Binding Protein 1 | Protein Coding | 43 | GC22P039403 | 5.310094 | <a href="https://www.genecards.org/cgi-bin/carddisp.pl?gene=TAB1">https://www.genecards.org/cgi-bin/carddisp.pl?gene=TAB1</a>         |
| SCG5     | Secretogranin V                                        | Protein Coding | 38 | GC15P032641 | 5.309402 | <a href="https://www.genecards.org/cgi-bin/carddisp.pl?gene=SCG5">https://www.genecards.org/cgi-bin/carddisp.pl?gene=SCG5</a>         |
| CERS2    | Ceramide Synthase 2                                    | Protein Coding | 40 | GC01M150934 | 5.306704 | <a href="https://www.genecards.org/cgi-bin/carddisp.pl?gene=CERS2">https://www.genecards.org/cgi-bin/carddisp.pl?gene=CERS2</a>       |
| WDR11    | WD Repeat Domain 11                                    | Protein Coding | 38 | GC10P120851 | 5.305739 | <a href="https://www.genecards.org/cgi-bin/carddisp.pl?gene=WDR11">https://www.genecards.org/cgi-bin/carddisp.pl?gene=WDR11</a>       |
| LATS1    | Large Tumor Suppressor Kinase 1                        | Protein Coding | 46 | GC06M149658 | 5.300023 | <a href="https://www.genecards.org/cgi-bin/carddisp.pl?gene=LATS1">https://www.genecards.org/cgi-bin/carddisp.pl?gene=LATS1</a>       |
| PHB2     | Prohibitin 2                                           | Protein Coding | 41 | GC12M006965 | 5.298043 | <a href="https://www.genecards.org/cgi-bin/carddisp.pl?gene=PHB2">https://www.genecards.org/cgi-bin/carddisp.pl?gene=PHB2</a>         |
| PDCD1LG2 | Programmed Cell Death 1 Ligand 2                       | Protein Coding | 42 | GC09P005510 | 5.297392 | <a href="https://www.genecards.org/cgi-bin/carddisp.pl?gene=PDCD1LG2">https://www.genecards.org/cgi-bin/carddisp.pl?gene=PDCD1LG2</a> |
| H3C14    | H3 Clustered Histone 14                                | Protein Coding | 29 | GC01M150132 | 5.295563 | <a href="https://www.genecards.org/cgi-bin/carddisp.pl?gene=H3C14">https://www.genecards.org/cgi-bin/carddisp.pl?gene=H3C14</a>       |
| BLMH     | Bleomycin Hydrolase                                    | Protein Coding | 44 | GC17M030248 | 5.294733 | <a href="https://www.genecards.org/cgi-bin/carddisp.pl?gene=BLMH">https://www.genecards.org/cgi-bin/carddisp.pl?gene=BLMH</a>         |
| TUBGCP6  | Tubulin Gamma Complex Associated Protein 6             | Protein Coding | 40 | GC22M050217 | 5.293694 | <a href="https://www.genecards.org/cgi-bin/carddisp.pl?gene=TUBGCP6">https://www.genecards.org/cgi-bin/carddisp.pl?gene=TUBGCP6</a>   |

|              |                                                                 |                   |    |                 |          |                                                                                                                                       |
|--------------|-----------------------------------------------------------------|-------------------|----|-----------------|----------|---------------------------------------------------------------------------------------------------------------------------------------|
| TARBP1       | TAR (HIV-1)<br>RNA Binding<br>Protein 1                         | Protein<br>Coding | 39 | GC01M234<br>391 | 5.293316 | <a href="https://www.genecards.org/cgi-bin/carddisp.pl?gene=TARBP1">https://www.genecards.org/cgi-bin/carddisp.pl?gene=TARBP1</a>     |
| HNRNPUL<br>1 | Heterogeneous<br>Nuclear<br>Ribonucleoprot<br>ein U Like 1      | Protein<br>Coding | 38 | GC19P0412<br>62 | 5.292706 | <a href="https://www.genecards.org/cgi-bin/carddisp.pl?gene=HNRNPUL1">https://www.genecards.org/cgi-bin/carddisp.pl?gene=HNRNPUL1</a> |
| CSN3         | Casein Kappa<br>Golgi Brefeldin<br>A Resistant                  | Protein<br>Coding | 35 | GC04P0702<br>42 | 5.28902  | <a href="https://www.genecards.org/cgi-bin/carddisp.pl?gene=CSN3">https://www.genecards.org/cgi-bin/carddisp.pl?gene=CSN3</a>         |
| GBF1         | Guanine<br>Nucleotide<br>Exchange<br>Factor 1                   | Protein<br>Coding | 44 | GC10P1022<br>45 | 5.288924 | <a href="https://www.genecards.org/cgi-bin/carddisp.pl?gene=GBF1">https://www.genecards.org/cgi-bin/carddisp.pl?gene=GBF1</a>         |
| RXRG         | Retinoid X<br>Receptor<br>Gamma                                 | Protein<br>Coding | 43 | GC01M165<br>401 | 5.285746 | <a href="https://www.genecards.org/cgi-bin/carddisp.pl?gene=RXRG">https://www.genecards.org/cgi-bin/carddisp.pl?gene=RXRG</a>         |
| HNRNPF       | Heterogeneous<br>Nuclear<br>Ribonucleoprot<br>ein F             | Protein<br>Coding | 41 | GC10M043<br>385 | 5.282759 | <a href="https://www.genecards.org/cgi-bin/carddisp.pl?gene=HNRNPF">https://www.genecards.org/cgi-bin/carddisp.pl?gene=HNRNPF</a>     |
| SORCS1       | Sortilin Related<br>VPS10 Domain<br>Containing<br>Receptor 1    | Protein<br>Coding | 39 | GC10M106<br>573 | 5.279704 | <a href="https://www.genecards.org/cgi-bin/carddisp.pl?gene=SORCS1">https://www.genecards.org/cgi-bin/carddisp.pl?gene=SORCS1</a>     |
| TNFRSF21     | TNF Receptor<br>Superfamily<br>Member 21                        | Protein<br>Coding | 45 | GC06M047<br>231 | 5.269147 | <a href="https://www.genecards.org/cgi-bin/carddisp.pl?gene=TNFRSF21">https://www.genecards.org/cgi-bin/carddisp.pl?gene=TNFRSF21</a> |
| CYSLTR1      | Cysteiny<br>Leukotriene<br>Receptor 1                           | Protein<br>Coding | 44 | GC0XM078<br>271 | 5.267043 | <a href="https://www.genecards.org/cgi-bin/carddisp.pl?gene=CYSLTR1">https://www.genecards.org/cgi-bin/carddisp.pl?gene=CYSLTR1</a>   |
| H3C1         | H3 Clustered<br>Histone 1                                       | Protein<br>Coding | 33 | GC06P0549<br>80 | 5.262321 | <a href="https://www.genecards.org/cgi-bin/carddisp.pl?gene=H3C1">https://www.genecards.org/cgi-bin/carddisp.pl?gene=H3C1</a>         |
| TUBA8        | Tubulin Alpha<br>8                                              | Protein<br>Coding | 45 | GC22P0181<br>10 | 5.253999 | <a href="https://www.genecards.org/cgi-bin/carddisp.pl?gene=TUBA8">https://www.genecards.org/cgi-bin/carddisp.pl?gene=TUBA8</a>       |
| STRADA       | STE20 Related<br>Adaptor Alpha                                  | Protein<br>Coding | 46 | GC17M063<br>683 | 5.251883 | <a href="https://www.genecards.org/cgi-bin/carddisp.pl?gene=STRADA">https://www.genecards.org/cgi-bin/carddisp.pl?gene=STRADA</a>     |
| FETUB        | Fetuin B                                                        | Protein<br>Coding | 37 | GC03P1866<br>35 | 5.250519 | <a href="https://www.genecards.org/cgi-bin/carddisp.pl?gene=FETUB">https://www.genecards.org/cgi-bin/carddisp.pl?gene=FETUB</a>       |
| SLC16A9      | Solute Carrier<br>Family 16<br>Member 9                         | Protein<br>Coding | 40 | GC10M059<br>650 | 5.249752 | <a href="https://www.genecards.org/cgi-bin/carddisp.pl?gene=SLC16A9">https://www.genecards.org/cgi-bin/carddisp.pl?gene=SLC16A9</a>   |
| PDCD4        | Programmed<br>Cell Death 4<br>CDC28 Protein                     | Protein<br>Coding | 43 | GC10P1108<br>71 | 5.247894 | <a href="https://www.genecards.org/cgi-bin/carddisp.pl?gene=PDCD4">https://www.genecards.org/cgi-bin/carddisp.pl?gene=PDCD4</a>       |
| CKS1B        | Kinase<br>Regulatory<br>Subunit 1B                              | Protein<br>Coding | 43 | GC01P1549<br>74 | 5.244964 | <a href="https://www.genecards.org/cgi-bin/carddisp.pl?gene=CKS1B">https://www.genecards.org/cgi-bin/carddisp.pl?gene=CKS1B</a>       |
| ATP2B1       | ATPase Plasma<br>Membrane<br>Ca <sup>2+</sup><br>Transporting 1 | Protein<br>Coding | 45 | GC12M089<br>588 | 5.244315 | <a href="https://www.genecards.org/cgi-bin/carddisp.pl?gene=ATP2B1">https://www.genecards.org/cgi-bin/carddisp.pl?gene=ATP2B1</a>     |
| EFNA1        | Ephrin A1                                                       | Protein<br>Coding | 44 | GC01P1551<br>27 | 5.244009 | <a href="https://www.genecards.org/cgi-bin/carddisp.pl?gene=EFNA1">https://www.genecards.org/cgi-bin/carddisp.pl?gene=EFNA1</a>       |
| PCBP1        | Poly(RC)<br>Binding Protein<br>1                                | Protein<br>Coding | 43 | GC02P0700<br>87 | 5.239912 | <a href="https://www.genecards.org/cgi-bin/carddisp.pl?gene=PCBP1">https://www.genecards.org/cgi-bin/carddisp.pl?gene=PCBP1</a>       |

|         |                                                                       |                |    |             |          |                                                                                                                                     |
|---------|-----------------------------------------------------------------------|----------------|----|-------------|----------|-------------------------------------------------------------------------------------------------------------------------------------|
| HIPK2   | Homeodomain Interacting Protein Kinase 2                              | Protein Coding | 45 | GC07M139561 | 5.239304 | <a href="https://www.genecards.org/cgi-bin/carddisp.pl?gene=HIPK2">https://www.genecards.org/cgi-bin/carddisp.pl?gene=HIPK2</a>     |
| MIR708  | MicroRNA 708                                                          | RNA Gene       | 18 | GC11M079402 | 5.237569 | <a href="https://www.genecards.org/cgi-bin/carddisp.pl?gene=MIR708">https://www.genecards.org/cgi-bin/carddisp.pl?gene=MIR708</a>   |
| RAB10   | RAB10, Member RAS Oncogene Family                                     | Protein Coding | 44 | GC02P026033 | 5.231869 | <a href="https://www.genecards.org/cgi-bin/carddisp.pl?gene=RAB10">https://www.genecards.org/cgi-bin/carddisp.pl?gene=RAB10</a>     |
| YIPF1   | Yip1 Domain Family Member 1                                           | Protein Coding | 36 | GC01M053851 | 5.226182 | <a href="https://www.genecards.org/cgi-bin/carddisp.pl?gene=YIPF1">https://www.genecards.org/cgi-bin/carddisp.pl?gene=YIPF1</a>     |
| NFE2    | Nuclear Factor, Erythroid 2                                           | Protein Coding | 41 | GC12M054292 | 5.225863 | <a href="https://www.genecards.org/cgi-bin/carddisp.pl?gene=NFE2">https://www.genecards.org/cgi-bin/carddisp.pl?gene=NFE2</a>       |
| RBSN    | Rabenosyn, RAB Effector                                               | Protein Coding | 38 | GC03M015070 | 5.224337 | <a href="https://www.genecards.org/cgi-bin/carddisp.pl?gene=RBSN">https://www.genecards.org/cgi-bin/carddisp.pl?gene=RBSN</a>       |
| TAPBPL  | TAP Binding Protein Like                                              | Protein Coding | 36 | GC12P006451 | 5.223886 | <a href="https://www.genecards.org/cgi-bin/carddisp.pl?gene=TAPBPL">https://www.genecards.org/cgi-bin/carddisp.pl?gene=TAPBPL</a>   |
| NKILA   | NF-KappaB Interacting LncRNA                                          | RNA Gene       | 11 | GC20P057711 | 5.223182 | <a href="https://www.genecards.org/cgi-bin/carddisp.pl?gene=NKILA">https://www.genecards.org/cgi-bin/carddisp.pl?gene=NKILA</a>     |
| HLX     | H2.0 Like Homeobox CREB                                               | Protein Coding | 41 | GC01P220879 | 5.220929 | <a href="https://www.genecards.org/cgi-bin/carddisp.pl?gene=HLX">https://www.genecards.org/cgi-bin/carddisp.pl?gene=HLX</a>         |
| CRTC1   | Regulated Transcription Coactivator 1                                 | Protein Coding | 43 | GC19P026660 | 5.217909 | <a href="https://www.genecards.org/cgi-bin/carddisp.pl?gene=CRTC1">https://www.genecards.org/cgi-bin/carddisp.pl?gene=CRTC1</a>     |
| GMDS    | GDP-Mannose 4,6-Dehydratase                                           | Protein Coding | 45 | GC06M001624 | 5.214139 | <a href="https://www.genecards.org/cgi-bin/carddisp.pl?gene=GMDS">https://www.genecards.org/cgi-bin/carddisp.pl?gene=GMDS</a>       |
| ETV5    | ETS Variant Transcription Factor 5                                    | Protein Coding | 40 | GC03M186046 | 5.212271 | <a href="https://www.genecards.org/cgi-bin/carddisp.pl?gene=ETV5">https://www.genecards.org/cgi-bin/carddisp.pl?gene=ETV5</a>       |
| COX7A2L | Cytochrome C Oxidase Subunit 7A2 Like                                 | Protein Coding | 42 | GC02M042312 | 5.210041 | <a href="https://www.genecards.org/cgi-bin/carddisp.pl?gene=COX7A2L">https://www.genecards.org/cgi-bin/carddisp.pl?gene=COX7A2L</a> |
| NACC1   | Nucleus Accumbens Associated 1                                        | Protein Coding | 41 | GC19P013117 | 5.208193 | <a href="https://www.genecards.org/cgi-bin/carddisp.pl?gene=NACC1">https://www.genecards.org/cgi-bin/carddisp.pl?gene=NACC1</a>     |
| DRAIC   | Downregulated RNA In Cancer, Inhibitor Of Cell Invasion And Migration | RNA Gene       | 14 | GC15P077110 | 5.206625 | <a href="https://www.genecards.org/cgi-bin/carddisp.pl?gene=DRAIC">https://www.genecards.org/cgi-bin/carddisp.pl?gene=DRAIC</a>     |
| EPS8    | Epidermal Growth Factor Receptor Pathway Substrate 8                  | Protein Coding | 46 | GC12M015765 | 5.204076 | <a href="https://www.genecards.org/cgi-bin/carddisp.pl?gene=EPS8">https://www.genecards.org/cgi-bin/carddisp.pl?gene=EPS8</a>       |
| SNX5    | Sorting Nexin 5                                                       | Protein Coding | 43 | GC20M017989 | 5.197326 | <a href="https://www.genecards.org/cgi-bin/carddisp.pl?gene=SNX5">https://www.genecards.org/cgi-bin/carddisp.pl?gene=SNX5</a>       |

|          |                                                                                                         |                |    |             |          |                                                                                                                                       |
|----------|---------------------------------------------------------------------------------------------------------|----------------|----|-------------|----------|---------------------------------------------------------------------------------------------------------------------------------------|
| NDUFB6   | NADH:Ubiquinone Oxidoreductase Subunit B6                                                               | Protein Coding | 40 | GC09M032553 | 5.196278 | <a href="https://www.genecards.org/cgi-bin/carddisp.pl?gene=NDUFB6">https://www.genecards.org/cgi-bin/carddisp.pl?gene=NDUFB6</a>     |
| VAPA     | VAMP Associated Protein A                                                                               | Protein Coding | 45 | GC18P009904 | 5.193147 | <a href="https://www.genecards.org/cgi-bin/carddisp.pl?gene=VAPA">https://www.genecards.org/cgi-bin/carddisp.pl?gene=VAPA</a>         |
| LMF1     | Lipase Maturation Factor 1                                                                              | Protein Coding | 39 | GC16M000853 | 5.186234 | <a href="https://www.genecards.org/cgi-bin/carddisp.pl?gene=LMF1">https://www.genecards.org/cgi-bin/carddisp.pl?gene=LMF1</a>         |
| CREB5    | CAMP Responsive Element Binding Protein 5                                                               | Protein Coding | 41 | GC07P028305 | 5.186048 | <a href="https://www.genecards.org/cgi-bin/carddisp.pl?gene=CREB5">https://www.genecards.org/cgi-bin/carddisp.pl?gene=CREB5</a>       |
| CCAR2    | Cell Cycle And Apoptosis Regulator 2                                                                    | Protein Coding | 37 | GC08P022604 | 5.180923 | <a href="https://www.genecards.org/cgi-bin/carddisp.pl?gene=CCAR2">https://www.genecards.org/cgi-bin/carddisp.pl?gene=CCAR2</a>       |
| ADI1     | Acireductone Dioxygenase 1                                                                              | Protein Coding | 41 | GC02M003501 | 5.177456 | <a href="https://www.genecards.org/cgi-bin/carddisp.pl?gene=ADI1">https://www.genecards.org/cgi-bin/carddisp.pl?gene=ADI1</a>         |
| PAICS    | Phosphoribosyl aminoimidazole Carboxylase And Phosphoribosyl aminoimidazole succinocarboxamide Synthase | Protein Coding | 43 | GC04P056410 | 5.174293 | <a href="https://www.genecards.org/cgi-bin/carddisp.pl?gene=PAICS">https://www.genecards.org/cgi-bin/carddisp.pl?gene=PAICS</a>       |
| SERPINA4 | Serpin Family A Member 4                                                                                | Protein Coding | 41 | GC14P094561 | 5.171369 | <a href="https://www.genecards.org/cgi-bin/carddisp.pl?gene=SERPINA4">https://www.genecards.org/cgi-bin/carddisp.pl?gene=SERPINA4</a> |
| DNAJA1   | DnaJ Heat Shock Protein Family (Hsp40) Member A1                                                        | Protein Coding | 42 | GC09P033025 | 5.169736 | <a href="https://www.genecards.org/cgi-bin/carddisp.pl?gene=DNAJA1">https://www.genecards.org/cgi-bin/carddisp.pl?gene=DNAJA1</a>     |
| DDX5     | DEAD-Box Helicase 5                                                                                     | Protein Coding | 47 | GC17M064498 | 5.166311 | <a href="https://www.genecards.org/cgi-bin/carddisp.pl?gene=DDX5">https://www.genecards.org/cgi-bin/carddisp.pl?gene=DDX5</a>         |
| CDC45    | Cell Division Cycle 45                                                                                  | Protein Coding | 45 | GC22P019479 | 5.163903 | <a href="https://www.genecards.org/cgi-bin/carddisp.pl?gene=CDC45">https://www.genecards.org/cgi-bin/carddisp.pl?gene=CDC45</a>       |
| PTGER3   | Prostaglandin E Receptor 3                                                                              | Protein Coding | 47 | GC01M070852 | 5.162956 | <a href="https://www.genecards.org/cgi-bin/carddisp.pl?gene=PTGER3">https://www.genecards.org/cgi-bin/carddisp.pl?gene=PTGER3</a>     |
| MIR449A  | MicroRNA 449a                                                                                           | RNA Gene       | 20 | GC05M055171 | 5.161534 | <a href="https://www.genecards.org/cgi-bin/carddisp.pl?gene=MIR449A">https://www.genecards.org/cgi-bin/carddisp.pl?gene=MIR449A</a>   |
| EPHB1    | EPH Receptor B1                                                                                         | Protein Coding | 48 | GC03P134598 | 5.158829 | <a href="https://www.genecards.org/cgi-bin/carddisp.pl?gene=EPHB1">https://www.genecards.org/cgi-bin/carddisp.pl?gene=EPHB1</a>       |
| ACTN3    | Actinin Alpha 3                                                                                         | Protein Coding | 40 | GC11P066546 | 5.152532 | <a href="https://www.genecards.org/cgi-bin/carddisp.pl?gene=ACTN3">https://www.genecards.org/cgi-bin/carddisp.pl?gene=ACTN3</a>       |
| SLC46A3  | Solute Carrier Family 46 Member 3                                                                       | Protein Coding | 37 | GC13M028700 | 5.150859 | <a href="https://www.genecards.org/cgi-bin/carddisp.pl?gene=SLC46A3">https://www.genecards.org/cgi-bin/carddisp.pl?gene=SLC46A3</a>   |
| PIK3C2G  | Phosphatidylinositol-4-Phosphate 3-Kinase Catalytic Subunit Type 2 Gamma                                | Protein Coding | 45 | GC12P018242 | 5.150577 | <a href="https://www.genecards.org/cgi-bin/carddisp.pl?gene=PIK3C2G">https://www.genecards.org/cgi-bin/carddisp.pl?gene=PIK3C2G</a>   |

|          |                                                      |                |    |             |          |                                                                                                                                       |
|----------|------------------------------------------------------|----------------|----|-------------|----------|---------------------------------------------------------------------------------------------------------------------------------------|
| CCDC88A  | Coiled-Coil Domain Containing 88A                    | Protein Coding | 41 | GC02M055287 | 5.148807 | <a href="https://www.genecards.org/cgi-bin/carddisp.pl?gene=CCDC88A">https://www.genecards.org/cgi-bin/carddisp.pl?gene=CCDC88A</a>   |
| SLC20A1  | Solute Carrier Family 20 Member 1                    | Protein Coding | 45 | GC02P116687 | 5.147126 | <a href="https://www.genecards.org/cgi-bin/carddisp.pl?gene=SLC20A1">https://www.genecards.org/cgi-bin/carddisp.pl?gene=SLC20A1</a>   |
| ADRA1D   | Adrenoceptor Alpha 1D                                | Protein Coding | 47 | GC20M004220 | 5.139572 | <a href="https://www.genecards.org/cgi-bin/carddisp.pl?gene=ADRA1D">https://www.genecards.org/cgi-bin/carddisp.pl?gene=ADRA1D</a>     |
| HTR1D    | Hydroxytryptamine Receptor 1D                        | Protein Coding | 47 | GC01M023191 | 5.136132 | <a href="https://www.genecards.org/cgi-bin/carddisp.pl?gene=HTR1D">https://www.genecards.org/cgi-bin/carddisp.pl?gene=HTR1D</a>       |
| ARHGAP15 | Rho GTPase Activating Protein 15                     | Protein Coding | 40 | GC02P143070 | 5.135595 | <a href="https://www.genecards.org/cgi-bin/carddisp.pl?gene=ARHGAP15">https://www.genecards.org/cgi-bin/carddisp.pl?gene=ARHGAP15</a> |
| BST2     | Bone Marrow Stromal Cell Antigen 2                   | Protein Coding | 40 | GC19M017403 | 5.132555 | <a href="https://www.genecards.org/cgi-bin/carddisp.pl?gene=BST2">https://www.genecards.org/cgi-bin/carddisp.pl?gene=BST2</a>         |
| HIC1     | HIC ZBTB Transcriptional Repressor 1                 | Protein Coding | 41 | GC17P002054 | 5.129323 | <a href="https://www.genecards.org/cgi-bin/carddisp.pl?gene=HIC1">https://www.genecards.org/cgi-bin/carddisp.pl?gene=HIC1</a>         |
| PVR      | PVR Cell Adhesion Molecule GABA Type A               | Protein Coding | 45 | GC19P044644 | 5.129155 | <a href="https://www.genecards.org/cgi-bin/carddisp.pl?gene=PVR">https://www.genecards.org/cgi-bin/carddisp.pl?gene=PVR</a>           |
| GABARAP  | Receptor-Associated Protein                          | Protein Coding | 45 | GC17M007240 | 5.123386 | <a href="https://www.genecards.org/cgi-bin/carddisp.pl?gene=GABARAP">https://www.genecards.org/cgi-bin/carddisp.pl?gene=GABARAP</a>   |
| ISCA1    | Iron-Sulfur Cluster Assembly 1                       | Protein Coding | 38 | GC09M086264 | 5.119548 | <a href="https://www.genecards.org/cgi-bin/carddisp.pl?gene=ISCA1">https://www.genecards.org/cgi-bin/carddisp.pl?gene=ISCA1</a>       |
| RPL9     | Ribosomal Protein L9                                 | Protein Coding | 43 | GC04M039452 | 5.117983 | <a href="https://www.genecards.org/cgi-bin/carddisp.pl?gene=RPL9">https://www.genecards.org/cgi-bin/carddisp.pl?gene=RPL9</a>         |
| RPS2     | Ribosomal Protein S2                                 | Protein Coding | 44 | GC16M003048 | 5.1156   | <a href="https://www.genecards.org/cgi-bin/carddisp.pl?gene=RPS2">https://www.genecards.org/cgi-bin/carddisp.pl?gene=RPS2</a>         |
| SLC30A9  | Solute Carrier Family 30 Member 9                    | Protein Coding | 42 | GC04P041992 | 5.1155   | <a href="https://www.genecards.org/cgi-bin/carddisp.pl?gene=SLC30A9">https://www.genecards.org/cgi-bin/carddisp.pl?gene=SLC30A9</a>   |
| MBOAT2   | Membrane Bound O-Acyltransferase Domain Containing 2 | Protein Coding | 36 | GC02M008853 | 5.114184 | <a href="https://www.genecards.org/cgi-bin/carddisp.pl?gene=MBOAT2">https://www.genecards.org/cgi-bin/carddisp.pl?gene=MBOAT2</a>     |
| EDC3     | Enhancer Of MRNA Decapping 3                         | Protein Coding | 43 | GC15M074631 | 5.112063 | <a href="https://www.genecards.org/cgi-bin/carddisp.pl?gene=EDC3">https://www.genecards.org/cgi-bin/carddisp.pl?gene=EDC3</a>         |
| ABCA2    | ATP Binding Cassette Subfamily A Member 2            | Protein Coding | 42 | GC09M137007 | 5.106331 | <a href="https://www.genecards.org/cgi-bin/carddisp.pl?gene=ABCA2">https://www.genecards.org/cgi-bin/carddisp.pl?gene=ABCA2</a>       |
| POU3F2   | POU Class 3 Homeobox 2                               | Protein Coding | 43 | GC06P098834 | 5.104515 | <a href="https://www.genecards.org/cgi-bin/carddisp.pl?gene=POU3F2">https://www.genecards.org/cgi-bin/carddisp.pl?gene=POU3F2</a>     |
| CD47     | CD47 Molecule                                        | Protein Coding | 44 | GC03M108043 | 5.103173 | <a href="https://www.genecards.org/cgi-bin/carddisp.pl?gene=CD47">https://www.genecards.org/cgi-bin/carddisp.pl?gene=CD47</a>         |
| LPAR3    | Lysophosphatidic Acid Receptor 3                     | Protein Coding | 44 | GC01M084811 | 5.102558 | <a href="https://www.genecards.org/cgi-bin/carddisp.pl?gene=LPAR3">https://www.genecards.org/cgi-bin/carddisp.pl?gene=LPAR3</a>       |

|         |                                                 |                |    |             |          |                                                                                                                                     |
|---------|-------------------------------------------------|----------------|----|-------------|----------|-------------------------------------------------------------------------------------------------------------------------------------|
| CLPS    | Colipase                                        | Protein Coding | 41 | GC06M047029 | 5.101025 | <a href="https://www.genecards.org/cgi-bin/carddisp.pl?gene=CLPS">https://www.genecards.org/cgi-bin/carddisp.pl?gene=CLPS</a>       |
| KAT2A   | Lysine Acetyltransferase 2A                     | Protein Coding | 48 | GC17M042113 | 5.100401 | <a href="https://www.genecards.org/cgi-bin/carddisp.pl?gene=KAT2A">https://www.genecards.org/cgi-bin/carddisp.pl?gene=KAT2A</a>     |
| H3-2    | H3.2 Histone (Putative)                         | Protein Coding | 17 | GC01M143894 | 5.099957 | <a href="https://www.genecards.org/cgi-bin/carddisp.pl?gene=H3-2">https://www.genecards.org/cgi-bin/carddisp.pl?gene=H3-2</a>       |
| CCN4    | Cellular Communication Network Factor 4         | Protein Coding | 31 | GC08P133192 | 5.098077 | <a href="https://www.genecards.org/cgi-bin/carddisp.pl?gene=CCN4">https://www.genecards.org/cgi-bin/carddisp.pl?gene=CCN4</a>       |
| SUGP1   | SURP And G-Patch Domain Containing 1            | Protein Coding | 35 | GC19M019276 | 5.097383 | <a href="https://www.genecards.org/cgi-bin/carddisp.pl?gene=SUGP1">https://www.genecards.org/cgi-bin/carddisp.pl?gene=SUGP1</a>     |
| ZBP1    | Z-DNA Binding Protein 1                         | Protein Coding | 39 | GC20M057603 | 5.08673  | <a href="https://www.genecards.org/cgi-bin/carddisp.pl?gene=ZBP1">https://www.genecards.org/cgi-bin/carddisp.pl?gene=ZBP1</a>       |
| CDCA7   | Cell Division Cycle Associated 7                | Protein Coding | 43 | GC02P173354 | 5.085614 | <a href="https://www.genecards.org/cgi-bin/carddisp.pl?gene=CDCA7">https://www.genecards.org/cgi-bin/carddisp.pl?gene=CDCA7</a>     |
| SLC23A1 | Solute Carrier Family 23 Member 1               | Protein Coding | 43 | GC05M139377 | 5.083595 | <a href="https://www.genecards.org/cgi-bin/carddisp.pl?gene=SLC23A1">https://www.genecards.org/cgi-bin/carddisp.pl?gene=SLC23A1</a> |
| IRF2    | Interferon Regulatory Factor 2                  | Protein Coding | 44 | GC04M184387 | 5.082381 | <a href="https://www.genecards.org/cgi-bin/carddisp.pl?gene=IRF2">https://www.genecards.org/cgi-bin/carddisp.pl?gene=IRF2</a>       |
| CLCC1   | Chloride Channel CLIC Like 1                    | Protein Coding | 39 | GC01M108946 | 5.079663 | <a href="https://www.genecards.org/cgi-bin/carddisp.pl?gene=CLCC1">https://www.genecards.org/cgi-bin/carddisp.pl?gene=CLCC1</a>     |
| NUB1    | Negative Regulator Of Ubiquitin Like Proteins 1 | Protein Coding | 38 | GC07P151341 | 5.078976 | <a href="https://www.genecards.org/cgi-bin/carddisp.pl?gene=NUB1">https://www.genecards.org/cgi-bin/carddisp.pl?gene=NUB1</a>       |
| BCO1    | Beta-Carotene Oxygenase 1                       | Protein Coding | 37 | GC16P081238 | 5.078071 | <a href="https://www.genecards.org/cgi-bin/carddisp.pl?gene=BCO1">https://www.genecards.org/cgi-bin/carddisp.pl?gene=BCO1</a>       |
| RPS9    | Ribosomal Protein S9                            | Protein Coding | 43 | GC19P056806 | 5.077768 | <a href="https://www.genecards.org/cgi-bin/carddisp.pl?gene=RPS9">https://www.genecards.org/cgi-bin/carddisp.pl?gene=RPS9</a>       |
| LPCAT1  | Lysophosphatidylcholine Acyltransferase 1       | Protein Coding | 37 | GC05M001456 | 5.075504 | <a href="https://www.genecards.org/cgi-bin/carddisp.pl?gene=LPCAT1">https://www.genecards.org/cgi-bin/carddisp.pl?gene=LPCAT1</a>   |
| TSEN34  | TRNA Splicing Endonuclease Subunit 34           | Protein Coding | 39 | GC19P056807 | 5.072359 | <a href="https://www.genecards.org/cgi-bin/carddisp.pl?gene=TSEN34">https://www.genecards.org/cgi-bin/carddisp.pl?gene=TSEN34</a>   |
| BAG1    | BAG Cochaperone 1                               | Protein Coding | 43 | GC09M033245 | 5.067912 | <a href="https://www.genecards.org/cgi-bin/carddisp.pl?gene=BAG1">https://www.genecards.org/cgi-bin/carddisp.pl?gene=BAG1</a>       |
| GPR3    | G Protein-Coupled Receptor 3                    | Protein Coding | 38 | GC01P027393 | 5.062634 | <a href="https://www.genecards.org/cgi-bin/carddisp.pl?gene=GPR3">https://www.genecards.org/cgi-bin/carddisp.pl?gene=GPR3</a>       |
| MYO18A  | Myosin XVIII A                                  | Protein Coding | 38 | GC17M031089 | 5.058605 | <a href="https://www.genecards.org/cgi-bin/carddisp.pl?gene=MYO18A">https://www.genecards.org/cgi-bin/carddisp.pl?gene=MYO18A</a>   |
| PRRX1   | Paired Related Homeobox 1                       | Protein Coding | 43 | GC01P170662 | 5.056304 | <a href="https://www.genecards.org/cgi-bin/carddisp.pl?gene=PRRX1">https://www.genecards.org/cgi-bin/carddisp.pl?gene=PRRX1</a>     |
| NPRL2   | NPR2 Like, GATOR1 Complex Subunit               | Protein Coding | 40 | GC03M050432 | 5.05545  | <a href="https://www.genecards.org/cgi-bin/carddisp.pl?gene=NPRL2">https://www.genecards.org/cgi-bin/carddisp.pl?gene=NPRL2</a>     |

|         |                                                 |                |    |             |          |                                                                                                                                     |
|---------|-------------------------------------------------|----------------|----|-------------|----------|-------------------------------------------------------------------------------------------------------------------------------------|
| GMPS    | Guanine Monophosphate Synthase                  | Protein Coding | 45 | GC03P155870 | 5.05473  | <a href="https://www.genecards.org/cgi-bin/carddisp.pl?gene=GMPS">https://www.genecards.org/cgi-bin/carddisp.pl?gene=GMPS</a>       |
| NPR3    | Natriuretic Peptide Receptor 3                  | Protein Coding | 45 | GC05P032689 | 5.052431 | <a href="https://www.genecards.org/cgi-bin/carddisp.pl?gene=NPR3">https://www.genecards.org/cgi-bin/carddisp.pl?gene=NPR3</a>       |
| GATAD2A | GATA Zinc Finger Domain Containing 2A           | Protein Coding | 39 | GC19P026663 | 5.045151 | <a href="https://www.genecards.org/cgi-bin/carddisp.pl?gene=GATAD2A">https://www.genecards.org/cgi-bin/carddisp.pl?gene=GATAD2A</a> |
| HSPH1   | Heat Shock Protein Family H (Hsp110) Member 1   | Protein Coding | 44 | GC13M031134 | 5.043779 | <a href="https://www.genecards.org/cgi-bin/carddisp.pl?gene=HSPH1">https://www.genecards.org/cgi-bin/carddisp.pl?gene=HSPH1</a>     |
| SORBS1  | Sorbin And SH3 Domain Containing 1              | Protein Coding | 42 | GC10M095311 | 5.04074  | <a href="https://www.genecards.org/cgi-bin/carddisp.pl?gene=SORBS1">https://www.genecards.org/cgi-bin/carddisp.pl?gene=SORBS1</a>   |
| H1-2    | H1.2 Linker Histone, Cluster Member             | Protein Coding | 33 | GC06M026056 | 5.039464 | <a href="https://www.genecards.org/cgi-bin/carddisp.pl?gene=H1-2">https://www.genecards.org/cgi-bin/carddisp.pl?gene=H1-2</a>       |
| PITPNA  | Phosphatidylinositol Transfer Protein Alpha     | Protein Coding | 41 | GC17M001530 | 5.034901 | <a href="https://www.genecards.org/cgi-bin/carddisp.pl?gene=PITPNA">https://www.genecards.org/cgi-bin/carddisp.pl?gene=PITPNA</a>   |
| TSC22D3 | TSC22 Domain Family Member 3                    | Protein Coding | 40 | GC0XM107713 | 5.034853 | <a href="https://www.genecards.org/cgi-bin/carddisp.pl?gene=TSC22D3">https://www.genecards.org/cgi-bin/carddisp.pl?gene=TSC22D3</a> |
| TRIM33  | Tripartite Motif Containing 33                  | Protein Coding | 44 | GC01M114392 | 5.034423 | <a href="https://www.genecards.org/cgi-bin/carddisp.pl?gene=TRIM33">https://www.genecards.org/cgi-bin/carddisp.pl?gene=TRIM33</a>   |
| ACSS3   | Acyl-CoA Synthetase Short Chain Family Member 3 | Protein Coding | 40 | GC12P080936 | 5.027635 | <a href="https://www.genecards.org/cgi-bin/carddisp.pl?gene=ACSS3">https://www.genecards.org/cgi-bin/carddisp.pl?gene=ACSS3</a>     |
| TRMT1   | TRNA Methyltransferase 1                        | Protein Coding | 43 | GC19M013104 | 5.026994 | <a href="https://www.genecards.org/cgi-bin/carddisp.pl?gene=TRMT1">https://www.genecards.org/cgi-bin/carddisp.pl?gene=TRMT1</a>     |
| ADORA3  | Adenosine A3 Receptor                           | Protein Coding | 47 | GC01M111499 | 5.025189 | <a href="https://www.genecards.org/cgi-bin/carddisp.pl?gene=ADORA3">https://www.genecards.org/cgi-bin/carddisp.pl?gene=ADORA3</a>   |
| MIR339  | MicroRNA 339                                    | RNA Gene       | 19 | GC07M001022 | 5.021282 | <a href="https://www.genecards.org/cgi-bin/carddisp.pl?gene=MIR339">https://www.genecards.org/cgi-bin/carddisp.pl?gene=MIR339</a>   |
| ADARB1  | Adenosine Deaminase RNA Specific B1             | Protein Coding | 45 | GC21P045073 | 5.019946 | <a href="https://www.genecards.org/cgi-bin/carddisp.pl?gene=ADARB1">https://www.genecards.org/cgi-bin/carddisp.pl?gene=ADARB1</a>   |
| AFM     | Afamin                                          | Protein Coding | 39 | GC04P073481 | 5.019556 | <a href="https://www.genecards.org/cgi-bin/carddisp.pl?gene=AFM">https://www.genecards.org/cgi-bin/carddisp.pl?gene=AFM</a>         |
| ZFP36   | ZFP36 Ring Finger Protein                       | Protein Coding | 40 | GC19P039406 | 5.019497 | <a href="https://www.genecards.org/cgi-bin/carddisp.pl?gene=ZFP36">https://www.genecards.org/cgi-bin/carddisp.pl?gene=ZFP36</a>     |
| ITGB5   | Integrin Subunit Beta 5                         | Protein Coding | 47 | GC03M124761 | 5.017797 | <a href="https://www.genecards.org/cgi-bin/carddisp.pl?gene=ITGB5">https://www.genecards.org/cgi-bin/carddisp.pl?gene=ITGB5</a>     |
| RAD51B  | RAD51 Paralog B                                 | Protein Coding | 39 | GC14P067819 | 5.014824 | <a href="https://www.genecards.org/cgi-bin/carddisp.pl?gene=RAD51B">https://www.genecards.org/cgi-bin/carddisp.pl?gene=RAD51B</a>   |
| DDX1    | DEAD-Box Helicase 1                             | Protein Coding | 44 | GC02P015591 | 5.01444  | <a href="https://www.genecards.org/cgi-bin/carddisp.pl?gene=DDX1">https://www.genecards.org/cgi-bin/carddisp.pl?gene=DDX1</a>       |
| PPM1B   | Protein Phosphatase, Mg2+/Mn2+ Dependent 1B     | Protein Coding | 45 | GC02P044167 | 5.0135   | <a href="https://www.genecards.org/cgi-bin/carddisp.pl?gene=PPM1B">https://www.genecards.org/cgi-bin/carddisp.pl?gene=PPM1B</a>     |



|           |                                                             |                |    |             |          |                                                                                                                                         |
|-----------|-------------------------------------------------------------|----------------|----|-------------|----------|-----------------------------------------------------------------------------------------------------------------------------------------|
| NRP2      | Neuropilin 2                                                | Protein Coding | 44 | GC02P205681 | 5.013129 | <a href="https://www.genecards.org/cgi-bin/carddisp.pl?gene=NRP2">https://www.genecards.org/cgi-bin/carddisp.pl?gene=NRP2</a>           |
| ETV4      | ETS Variant Transcription Factor 4                          | Protein Coding | 44 | GC17M043527 | 5.005972 | <a href="https://www.genecards.org/cgi-bin/carddisp.pl?gene=ETV4">https://www.genecards.org/cgi-bin/carddisp.pl?gene=ETV4</a>           |
| ELAVL2    | ELAV Like RNA Binding Protein 2                             | Protein Coding | 43 | GC09M023690 | 5.004536 | <a href="https://www.genecards.org/cgi-bin/carddisp.pl?gene=ELAVL2">https://www.genecards.org/cgi-bin/carddisp.pl?gene=ELAVL2</a>       |
| CLDN11    | Claudin 11                                                  | Protein Coding | 41 | GC03P170418 | 5.000122 | <a href="https://www.genecards.org/cgi-bin/carddisp.pl?gene=CLDN11">https://www.genecards.org/cgi-bin/carddisp.pl?gene=CLDN11</a>       |
| ABHD4     | Abhydrolase Domain Containing 4, N-Acyl Phospholipase B     | Protein Coding | 38 | GC14P026301 | 4.995811 | <a href="https://www.genecards.org/cgi-bin/carddisp.pl?gene=ABHD4">https://www.genecards.org/cgi-bin/carddisp.pl?gene=ABHD4</a>         |
| VIL1      | Villin 1                                                    | Protein Coding | 40 | GC02P218419 | 4.985763 | <a href="https://www.genecards.org/cgi-bin/carddisp.pl?gene=VIL1">https://www.genecards.org/cgi-bin/carddisp.pl?gene=VIL1</a>           |
| TRMT10A   | TRNA Methyltransferase 10A                                  | Protein Coding | 37 | GC04M099546 | 4.983926 | <a href="https://www.genecards.org/cgi-bin/carddisp.pl?gene=TRMT10A">https://www.genecards.org/cgi-bin/carddisp.pl?gene=TRMT10A</a>     |
| RGS1      | Regulator Of G Protein Signaling 1                          | Protein Coding | 39 | GC01P192575 | 4.97747  | <a href="https://www.genecards.org/cgi-bin/carddisp.pl?gene=RGS1">https://www.genecards.org/cgi-bin/carddisp.pl?gene=RGS1</a>           |
| CLRN1-AS1 | CLRN1 Antisense RNA 1                                       | RNA Gene       | 17 | GC03P150852 | 4.974565 | <a href="https://www.genecards.org/cgi-bin/carddisp.pl?gene=CLRN1-AS1">https://www.genecards.org/cgi-bin/carddisp.pl?gene=CLRN1-AS1</a> |
| TCIM      | Transcriptional And Immune Response Regulator               | Protein Coding | 26 | GC08P040153 | 4.973174 | <a href="https://www.genecards.org/cgi-bin/carddisp.pl?gene=TCIM">https://www.genecards.org/cgi-bin/carddisp.pl?gene=TCIM</a>           |
| ANOS1     | Anosmin 1                                                   | Protein Coding | 36 | GC0XM008528 | 4.971453 | <a href="https://www.genecards.org/cgi-bin/carddisp.pl?gene=ANOS1">https://www.genecards.org/cgi-bin/carddisp.pl?gene=ANOS1</a>         |
| ASH2L     | ASH2 Like, Histone Lysine Methyltransferase Complex Subunit | Protein Coding | 43 | GC08P038104 | 4.9712   | <a href="https://www.genecards.org/cgi-bin/carddisp.pl?gene=ASH2L">https://www.genecards.org/cgi-bin/carddisp.pl?gene=ASH2L</a>         |
| LAMC1     | Laminin Subunit Gamma 1                                     | Protein Coding | 44 | GC01P182992 | 4.96647  | <a href="https://www.genecards.org/cgi-bin/carddisp.pl?gene=LAMC1">https://www.genecards.org/cgi-bin/carddisp.pl?gene=LAMC1</a>         |
| BTG1      | BTG Anti-Proliferation Factor 1                             | Protein Coding | 42 | GC12M092140 | 4.961415 | <a href="https://www.genecards.org/cgi-bin/carddisp.pl?gene=BTG1">https://www.genecards.org/cgi-bin/carddisp.pl?gene=BTG1</a>           |
| FGF17     | Fibroblast Growth Factor 17                                 | Protein Coding | 46 | GC08P022042 | 4.959321 | <a href="https://www.genecards.org/cgi-bin/carddisp.pl?gene=FGF17">https://www.genecards.org/cgi-bin/carddisp.pl?gene=FGF17</a>         |
| SH3GL2    | SH3 Domain Containing GRB2 Like 2, Endophilin A1            | Protein Coding | 44 | GC09P017569 | 4.958919 | <a href="https://www.genecards.org/cgi-bin/carddisp.pl?gene=SH3GL2">https://www.genecards.org/cgi-bin/carddisp.pl?gene=SH3GL2</a>       |
| SASH1     | SAM And SH3 Domain Containing 1                             | Protein Coding | 40 | GC06P148193 | 4.9572   | <a href="https://www.genecards.org/cgi-bin/carddisp.pl?gene=SASH1">https://www.genecards.org/cgi-bin/carddisp.pl?gene=SASH1</a>         |
| SMPD3     | Sphingomyelin Phosphodiesterase 3                           | Protein Coding | 41 | GC16M068358 | 4.953752 | <a href="https://www.genecards.org/cgi-bin/carddisp.pl?gene=SMPD3">https://www.genecards.org/cgi-bin/carddisp.pl?gene=SMPD3</a>         |

|           |                                                        |                |    |             |          |                                                                                                                                         |
|-----------|--------------------------------------------------------|----------------|----|-------------|----------|-----------------------------------------------------------------------------------------------------------------------------------------|
| ILF3      | Interleukin Enhancer Binding Factor 3                  | Protein Coding | 39 | GC19P010625 | 4.949592 | <a href="https://www.genecards.org/cgi-bin/carddisp.pl?gene=ILF3">https://www.genecards.org/cgi-bin/carddisp.pl?gene=ILF3</a>           |
| UHRF1     | Ubiquitin Like With PHD And Ring Finger Domains 1      | Protein Coding | 40 | GC19P004910 | 4.949112 | <a href="https://www.genecards.org/cgi-bin/carddisp.pl?gene=UHRF1">https://www.genecards.org/cgi-bin/carddisp.pl?gene=UHRF1</a>         |
| KPNA1     | Karyopherin Subunit Alpha 1                            | Protein Coding | 42 | GC03M122421 | 4.948489 | <a href="https://www.genecards.org/cgi-bin/carddisp.pl?gene=KPNA1">https://www.genecards.org/cgi-bin/carddisp.pl?gene=KPNA1</a>         |
| DEPTOR    | DEP Domain Containing MTOR Interacting Protein         | Protein Coding | 40 | GC08P119873 | 4.945203 | <a href="https://www.genecards.org/cgi-bin/carddisp.pl?gene=DEPTOR">https://www.genecards.org/cgi-bin/carddisp.pl?gene=DEPTOR</a>       |
| QARS1     | Glutamyl-TRNA Synthetase 1 Grainyhead                  | Protein Coding | 26 | GC03M049445 | 4.941287 | <a href="https://www.genecards.org/cgi-bin/carddisp.pl?gene=QARS1">https://www.genecards.org/cgi-bin/carddisp.pl?gene=QARS1</a>         |
| GRHL3     | Like Transcription Factor 3                            | Protein Coding | 39 | GC01P024319 | 4.940988 | <a href="https://www.genecards.org/cgi-bin/carddisp.pl?gene=GRHL3">https://www.genecards.org/cgi-bin/carddisp.pl?gene=GRHL3</a>         |
| RALA      | RAS Like Proto-Oncogene A Membrane Bound               | Protein Coding | 46 | GC07P039622 | 4.939548 | <a href="https://www.genecards.org/cgi-bin/carddisp.pl?gene=RALA">https://www.genecards.org/cgi-bin/carddisp.pl?gene=RALA</a>           |
| MBTPS1    | Transcription Factor Peptidase, Site 1                 | Protein Coding | 44 | GC16M084053 | 4.933723 | <a href="https://www.genecards.org/cgi-bin/carddisp.pl?gene=MBTPS1">https://www.genecards.org/cgi-bin/carddisp.pl?gene=MBTPS1</a>       |
| PMPCB     | Peptidase, Mitochondrial Processing Subunit Beta N-    | Protein Coding | 44 | GC07P103297 | 4.930259 | <a href="https://www.genecards.org/cgi-bin/carddisp.pl?gene=PMPCB">https://www.genecards.org/cgi-bin/carddisp.pl?gene=PMPCB</a>         |
| NSF       | Ethylmaleimide Sensitive Factor, Vesicle Fusing ATPase | Protein Coding | 45 | GC17P046590 | 4.923376 | <a href="https://www.genecards.org/cgi-bin/carddisp.pl?gene=NSF">https://www.genecards.org/cgi-bin/carddisp.pl?gene=NSF</a>             |
| AHSA1     | Activator Of HSP90 ATPase Activity 1                   | Protein Coding | 40 | GC14P077457 | 4.922819 | <a href="https://www.genecards.org/cgi-bin/carddisp.pl?gene=AHSA1">https://www.genecards.org/cgi-bin/carddisp.pl?gene=AHSA1</a>         |
| IGF2BP3   | Insulin Like Growth Factor 2 MRNA Binding Protein 3    | Protein Coding | 42 | GC07M023316 | 4.922432 | <a href="https://www.genecards.org/cgi-bin/carddisp.pl?gene=IGF2BP3">https://www.genecards.org/cgi-bin/carddisp.pl?gene=IGF2BP3</a>     |
| DHX9      | DExH-Box Helicase 9                                    | Protein Coding | 41 | GC01P182839 | 4.920265 | <a href="https://www.genecards.org/cgi-bin/carddisp.pl?gene=DHX9">https://www.genecards.org/cgi-bin/carddisp.pl?gene=DHX9</a>           |
| LINC01018 | Long Intergenic Non-Protein Coding RNA 1018            | RNA Gene       | 16 | GC05P006582 | 4.91708  | <a href="https://www.genecards.org/cgi-bin/carddisp.pl?gene=LINC01018">https://www.genecards.org/cgi-bin/carddisp.pl?gene=LINC01018</a> |

|          |                                                   |                |    |             |          |                                                                                                                                       |
|----------|---------------------------------------------------|----------------|----|-------------|----------|---------------------------------------------------------------------------------------------------------------------------------------|
| PRUNE1   | Prune Exopolyphosphatase 1                        | Protein Coding | 33 | GC01P151008 | 4.913444 | <a href="https://www.genecards.org/cgi-bin/carddisp.pl?gene=PRUNE1">https://www.genecards.org/cgi-bin/carddisp.pl?gene=PRUNE1</a>     |
| PAPSS1   | 3'-Phosphoadenosine 5'-Phosphosulfate Synthase 1  | Protein Coding | 44 | GC04M107590 | 4.909002 | <a href="https://www.genecards.org/cgi-bin/carddisp.pl?gene=PAPSS1">https://www.genecards.org/cgi-bin/carddisp.pl?gene=PAPSS1</a>     |
| GTF2H4   | General Transcription Factor IIH Subunit 4        | Protein Coding | 41 | GC06P055185 | 4.904338 | <a href="https://www.genecards.org/cgi-bin/carddisp.pl?gene=GTF2H4">https://www.genecards.org/cgi-bin/carddisp.pl?gene=GTF2H4</a>     |
| CSAD     | Cysteine Sulfinic Acid Decarboxylase              | Protein Coding | 41 | GC12M053160 | 4.903358 | <a href="https://www.genecards.org/cgi-bin/carddisp.pl?gene=CSAD">https://www.genecards.org/cgi-bin/carddisp.pl?gene=CSAD</a>         |
| RBM28    | RNA Binding Motif Protein 28                      | Protein Coding | 39 | GC07M128320 | 4.903311 | <a href="https://www.genecards.org/cgi-bin/carddisp.pl?gene=RBM28">https://www.genecards.org/cgi-bin/carddisp.pl?gene=RBM28</a>       |
| CERNA2   | Competing Endogenous LncRNA 2 For MicroRNA Let-7b | RNA Gene       | 11 | GC10M084169 | 4.899542 | <a href="https://www.genecards.org/cgi-bin/carddisp.pl?gene=CERNA2">https://www.genecards.org/cgi-bin/carddisp.pl?gene=CERNA2</a>     |
| SERPINB4 | Serpin Family B Member 4                          | Protein Coding | 39 | GC18M063637 | 4.897576 | <a href="https://www.genecards.org/cgi-bin/carddisp.pl?gene=SERPINB4">https://www.genecards.org/cgi-bin/carddisp.pl?gene=SERPINB4</a> |
| ZP4      | Zona Pellucida Glycoprotein 4                     | Protein Coding | 33 | GC01M237877 | 4.897009 | <a href="https://www.genecards.org/cgi-bin/carddisp.pl?gene=ZP4">https://www.genecards.org/cgi-bin/carddisp.pl?gene=ZP4</a>           |
| RSPO4    | R-Spondin 4                                       | Protein Coding | 37 | GC20M000958 | 4.895551 | <a href="https://www.genecards.org/cgi-bin/carddisp.pl?gene=RSPO4">https://www.genecards.org/cgi-bin/carddisp.pl?gene=RSPO4</a>       |
| GPN1     | GPN-Loop GTPase 1                                 | Protein Coding | 38 | GC02P027628 | 4.889051 | <a href="https://www.genecards.org/cgi-bin/carddisp.pl?gene=GPN1">https://www.genecards.org/cgi-bin/carddisp.pl?gene=GPN1</a>         |
| NMT2     | N-Myristoyltransferase 2                          | Protein Coding | 41 | GC10M015115 | 4.888861 | <a href="https://www.genecards.org/cgi-bin/carddisp.pl?gene=NMT2">https://www.genecards.org/cgi-bin/carddisp.pl?gene=NMT2</a>         |
| SLC23A2  | Solute Carrier Family 23 Member 2                 | Protein Coding | 43 | GC20M004852 | 4.887442 | <a href="https://www.genecards.org/cgi-bin/carddisp.pl?gene=SLC23A2">https://www.genecards.org/cgi-bin/carddisp.pl?gene=SLC23A2</a>   |
| HPGDS    | Hematopoietic Prostaglandin D Synthase            | Protein Coding | 43 | GC04M094298 | 4.882298 | <a href="https://www.genecards.org/cgi-bin/carddisp.pl?gene=HPGDS">https://www.genecards.org/cgi-bin/carddisp.pl?gene=HPGDS</a>       |
| MED19    | Mediator Complex Subunit 19                       | Protein Coding | 33 | GC11M057703 | 4.881899 | <a href="https://www.genecards.org/cgi-bin/carddisp.pl?gene=MED19">https://www.genecards.org/cgi-bin/carddisp.pl?gene=MED19</a>       |
| CASP4    | Caspase 4                                         | Protein Coding | 47 | GC11M104942 | 4.878319 | <a href="https://www.genecards.org/cgi-bin/carddisp.pl?gene=CASP4">https://www.genecards.org/cgi-bin/carddisp.pl?gene=CASP4</a>       |
| MAD2L1   | Mitotic Arrest Deficient 2 Like 1                 | Protein Coding | 46 | GC04M120055 | 4.868076 | <a href="https://www.genecards.org/cgi-bin/carddisp.pl?gene=MAD2L1">https://www.genecards.org/cgi-bin/carddisp.pl?gene=MAD2L1</a>     |
| PELP1    | Proline, Glutamate And Leucine Rich Protein 1     | Protein Coding | 40 | GC17M004669 | 4.866016 | <a href="https://www.genecards.org/cgi-bin/carddisp.pl?gene=PELP1">https://www.genecards.org/cgi-bin/carddisp.pl?gene=PELP1</a>       |
| PNPLA7   | Patatin Like Phospholipase Domain Containing 7    | Protein Coding | 34 | GC09M137459 | 4.864989 | <a href="https://www.genecards.org/cgi-bin/carddisp.pl?gene=PNPLA7">https://www.genecards.org/cgi-bin/carddisp.pl?gene=PNPLA7</a>     |

|         |                                                                                                  |                |    |             |          |                                                                                                                                     |
|---------|--------------------------------------------------------------------------------------------------|----------------|----|-------------|----------|-------------------------------------------------------------------------------------------------------------------------------------|
| KPNA2   | Karyopherin Subunit Alpha 2                                                                      | Protein Coding | 46 | GC17P068035 | 4.86267  | <a href="https://www.genecards.org/cgi-bin/carddisp.pl?gene=KPNA2">https://www.genecards.org/cgi-bin/carddisp.pl?gene=KPNA2</a>     |
| EEF1D   | Eukaryotic Translation Elongation Factor 1 Delta Ring Finger Protein, LIM Domain Interacting Sp3 | Protein Coding | 43 | GC08M143579 | 4.859773 | <a href="https://www.genecards.org/cgi-bin/carddisp.pl?gene=EEF1D">https://www.genecards.org/cgi-bin/carddisp.pl?gene=EEF1D</a>     |
| RLIM    | Transcription Factor                                                                             | Protein Coding | 40 | GC0XM074612 | 4.859679 | <a href="https://www.genecards.org/cgi-bin/carddisp.pl?gene=RLIM">https://www.genecards.org/cgi-bin/carddisp.pl?gene=RLIM</a>       |
| SP3     | Transmembrane Protein 119                                                                        | Protein Coding | 43 | GC02M173882 | 4.850002 | <a href="https://www.genecards.org/cgi-bin/carddisp.pl?gene=SP3">https://www.genecards.org/cgi-bin/carddisp.pl?gene=SP3</a>         |
| TMEM119 | Cell Adhesion Molecule L1 Like                                                                   | Protein Coding | 33 | GC12M108589 | 4.849542 | <a href="https://www.genecards.org/cgi-bin/carddisp.pl?gene=TMEM119">https://www.genecards.org/cgi-bin/carddisp.pl?gene=TMEM119</a> |
| CHL1    | ATP Binding Cassette Subfamily G Member 4                                                        | Protein Coding | 40 | GC03P000213 | 4.849366 | <a href="https://www.genecards.org/cgi-bin/carddisp.pl?gene=CHL1">https://www.genecards.org/cgi-bin/carddisp.pl?gene=CHL1</a>       |
| ABCG4   | Protein Kinase C And Casein Kinase Substrate In Neurons 3                                        | Protein Coding | 40 | GC11P119150 | 4.835479 | <a href="https://www.genecards.org/cgi-bin/carddisp.pl?gene=ABCG4">https://www.genecards.org/cgi-bin/carddisp.pl?gene=ABCG4</a>     |
| PACSIN3 | Hypoxia Inducible Factor 1 Subunit Alpha Inhibitor                                               | Protein Coding | 38 | GC11M068990 | 4.833481 | <a href="https://www.genecards.org/cgi-bin/carddisp.pl?gene=PACSIN3">https://www.genecards.org/cgi-bin/carddisp.pl?gene=PACSIN3</a> |
| HIF1AN  | Ring Finger Protein 114                                                                          | Protein Coding | 45 | GC10P100529 | 4.83341  | <a href="https://www.genecards.org/cgi-bin/carddisp.pl?gene=HIF1AN">https://www.genecards.org/cgi-bin/carddisp.pl?gene=HIF1AN</a>   |
| RNF114  | Cyclin E2                                                                                        | Protein Coding | 40 | GC20P049936 | 4.831755 | <a href="https://www.genecards.org/cgi-bin/carddisp.pl?gene=RNF114">https://www.genecards.org/cgi-bin/carddisp.pl?gene=RNF114</a>   |
| CCNE2   | Scaffold Attachment Factor B                                                                     | Protein Coding | 43 | GC08M094879 | 4.827953 | <a href="https://www.genecards.org/cgi-bin/carddisp.pl?gene=CCNE2">https://www.genecards.org/cgi-bin/carddisp.pl?gene=CCNE2</a>     |
| SAFB    | Sulfatase 2                                                                                      | Protein Coding | 40 | GC19P005623 | 4.825727 | <a href="https://www.genecards.org/cgi-bin/carddisp.pl?gene=SAFB">https://www.genecards.org/cgi-bin/carddisp.pl?gene=SAFB</a>       |
| SULF2   | WEE1 G2 Checkpoint Kinase                                                                        | Protein Coding | 41 | GC20M047656 | 4.820007 | <a href="https://www.genecards.org/cgi-bin/carddisp.pl?gene=SULF2">https://www.genecards.org/cgi-bin/carddisp.pl?gene=SULF2</a>     |
| WEE1    | Calcium/Calmodulin Dependent Protein Kinase II Delta                                             | Protein Coding | 47 | GC11P009573 | 4.817445 | <a href="https://www.genecards.org/cgi-bin/carddisp.pl?gene=WEE1">https://www.genecards.org/cgi-bin/carddisp.pl?gene=WEE1</a>       |
| CAMK2D  | Family With Sequence Similarity 107 Member B                                                     | Protein Coding | 50 | GC04M113452 | 4.813475 | <a href="https://www.genecards.org/cgi-bin/carddisp.pl?gene=CAMK2D">https://www.genecards.org/cgi-bin/carddisp.pl?gene=CAMK2D</a>   |
| FAM107B | NADH:Ubiquinone Oxidoreductase Subunit A3                                                        | Protein Coding | 34 | GC10M014519 | 4.809675 | <a href="https://www.genecards.org/cgi-bin/carddisp.pl?gene=FAM107B">https://www.genecards.org/cgi-bin/carddisp.pl?gene=FAM107B</a> |
| NDUFA3  |                                                                                                  | Protein Coding | 39 | GC19P054102 | 4.80818  | <a href="https://www.genecards.org/cgi-bin/carddisp.pl?gene=NDUFA3">https://www.genecards.org/cgi-bin/carddisp.pl?gene=NDUFA3</a>   |

|           |                                                        |                |    |             |          |                                                                                                                                         |
|-----------|--------------------------------------------------------|----------------|----|-------------|----------|-----------------------------------------------------------------------------------------------------------------------------------------|
| SH3BP5    | SH3 Domain Binding Protein 5                           | Protein Coding | 41 | GC03M016936 | 4.805813 | <a href="https://www.genecards.org/cgi-bin/carddisp.pl?gene=SH3BP5">https://www.genecards.org/cgi-bin/carddisp.pl?gene=SH3BP5</a>       |
| ENAH      | ENAH Actin Regulator                                   | Protein Coding | 42 | GC01M225486 | 4.804333 | <a href="https://www.genecards.org/cgi-bin/carddisp.pl?gene=ENAH">https://www.genecards.org/cgi-bin/carddisp.pl?gene=ENAH</a>           |
| MRC2      | Mannose Receptor C Type 2                              | Protein Coding | 41 | GC17P062627 | 4.803771 | <a href="https://www.genecards.org/cgi-bin/carddisp.pl?gene=MRC2">https://www.genecards.org/cgi-bin/carddisp.pl?gene=MRC2</a>           |
| ROCK2     | Rho Associated Coiled-Coil Containing Protein Kinase 2 | Protein Coding | 48 | GC02M011227 | 4.803446 | <a href="https://www.genecards.org/cgi-bin/carddisp.pl?gene=ROCK2">https://www.genecards.org/cgi-bin/carddisp.pl?gene=ROCK2</a>         |
| LINC01772 | Long Intergenic Non-Protein Coding RNA 1772            | RNA Gene       | 11 | GC01P016507 | 4.801759 | <a href="https://www.genecards.org/cgi-bin/carddisp.pl?gene=LINC01772">https://www.genecards.org/cgi-bin/carddisp.pl?gene=LINC01772</a> |
| MIR202    | MicroRNA 202                                           | RNA Gene       | 18 | GC10M133247 | 4.797756 | <a href="https://www.genecards.org/cgi-bin/carddisp.pl?gene=MIR202">https://www.genecards.org/cgi-bin/carddisp.pl?gene=MIR202</a>       |
| PROK2     | Prokineticin 2                                         | Protein Coding | 44 | GC03M071771 | 4.796023 | <a href="https://www.genecards.org/cgi-bin/carddisp.pl?gene=PROK2">https://www.genecards.org/cgi-bin/carddisp.pl?gene=PROK2</a>         |
| E2F7      | E2F Transcription Factor 7                             | Protein Coding | 38 | GC12M077021 | 4.793831 | <a href="https://www.genecards.org/cgi-bin/carddisp.pl?gene=E2F7">https://www.genecards.org/cgi-bin/carddisp.pl?gene=E2F7</a>           |
| DISC2     | Disrupted In Schizophrenia 2                           | RNA Gene       | 19 | GC01M231814 | 4.791626 | <a href="https://www.genecards.org/cgi-bin/carddisp.pl?gene=DISC2">https://www.genecards.org/cgi-bin/carddisp.pl?gene=DISC2</a>         |
| MCM7      | Minichromosome Maintenance Complex Component 7         | Protein Coding | 45 | GC07M100092 | 4.789493 | <a href="https://www.genecards.org/cgi-bin/carddisp.pl?gene=MCM7">https://www.genecards.org/cgi-bin/carddisp.pl?gene=MCM7</a>           |
| MAP2K5    | Activated Protein Kinase Kinase 5                      | Protein Coding | 47 | GC15P077101 | 4.786411 | <a href="https://www.genecards.org/cgi-bin/carddisp.pl?gene=MAP2K5">https://www.genecards.org/cgi-bin/carddisp.pl?gene=MAP2K5</a>       |
| MAGI2-AS3 | MAGI2 Antisense RNA 3                                  | RNA Gene       | 16 | GC07P079452 | 4.784665 | <a href="https://www.genecards.org/cgi-bin/carddisp.pl?gene=MAGI2-AS3">https://www.genecards.org/cgi-bin/carddisp.pl?gene=MAGI2-AS3</a> |
| NRG4      | Neuregulin 4                                           | Protein Coding | 40 | GC15M075935 | 4.78399  | <a href="https://www.genecards.org/cgi-bin/carddisp.pl?gene=NRG4">https://www.genecards.org/cgi-bin/carddisp.pl?gene=NRG4</a>           |
| ANXA9     | Annexin A9                                             | Protein Coding | 39 | GC01P150982 | 4.783628 | <a href="https://www.genecards.org/cgi-bin/carddisp.pl?gene=ANXA9">https://www.genecards.org/cgi-bin/carddisp.pl?gene=ANXA9</a>         |
| RPS4X     | Ribosomal Protein S4 X-Linked                          | Protein Coding | 40 | GC0XM072255 | 4.781923 | <a href="https://www.genecards.org/cgi-bin/carddisp.pl?gene=RPS4X">https://www.genecards.org/cgi-bin/carddisp.pl?gene=RPS4X</a>         |
| ARID4B    | AT-Rich Interaction Domain 4B                          | Protein Coding | 37 | GC01M235133 | 4.776742 | <a href="https://www.genecards.org/cgi-bin/carddisp.pl?gene=ARID4B">https://www.genecards.org/cgi-bin/carddisp.pl?gene=ARID4B</a>       |
| CA1       | Carbonic Anhydrase 1                                   | Protein Coding | 47 | GC08M085327 | 4.775258 | <a href="https://www.genecards.org/cgi-bin/carddisp.pl?gene=CA1">https://www.genecards.org/cgi-bin/carddisp.pl?gene=CA1</a>             |
| BBC3      | BCL2 Binding Component 3                               | Protein Coding | 41 | GC19M047220 | 4.775219 | <a href="https://www.genecards.org/cgi-bin/carddisp.pl?gene=BBC3">https://www.genecards.org/cgi-bin/carddisp.pl?gene=BBC3</a>           |
| POMP      | Proteasome Maturation Protein                          | Protein Coding | 43 | GC13P028659 | 4.772102 | <a href="https://www.genecards.org/cgi-bin/carddisp.pl?gene=POMP">https://www.genecards.org/cgi-bin/carddisp.pl?gene=POMP</a>           |

|           |                                                           |                |    |             |          |                                                                                                                                         |
|-----------|-----------------------------------------------------------|----------------|----|-------------|----------|-----------------------------------------------------------------------------------------------------------------------------------------|
| SERPINB7  | Serpin Family B Member 7                                  | Protein Coding | 41 | GC18P063752 | 4.769883 | <a href="https://www.genecards.org/cgi-bin/carddisp.pl?gene=SERPINB7">https://www.genecards.org/cgi-bin/carddisp.pl?gene=SERPINB7</a>   |
| WIF1      | WNT Inhibitory Factor 1<br>EI24                           | Protein Coding | 45 | GC12M065050 | 4.769465 | <a href="https://www.genecards.org/cgi-bin/carddisp.pl?gene=WIF1">https://www.genecards.org/cgi-bin/carddisp.pl?gene=WIF1</a>           |
| EI24      | Autophagy Associated Transmembrane Protein<br>Zinc Finger | Protein Coding | 37 | GC11P125570 | 4.764522 | <a href="https://www.genecards.org/cgi-bin/carddisp.pl?gene=EI24">https://www.genecards.org/cgi-bin/carddisp.pl?gene=EI24</a>           |
| ZDHHC17   | DHHC-Type Palmitoyltransferase 17                         | Protein Coding | 38 | GC12P076763 | 4.758674 | <a href="https://www.genecards.org/cgi-bin/carddisp.pl?gene=ZDHHC17">https://www.genecards.org/cgi-bin/carddisp.pl?gene=ZDHHC17</a>     |
| CABIN1    | Calcineurin Binding Protein 1                             | Protein Coding | 42 | GC22P024011 | 4.75823  | <a href="https://www.genecards.org/cgi-bin/carddisp.pl?gene=CABIN1">https://www.genecards.org/cgi-bin/carddisp.pl?gene=CABIN1</a>       |
| RPS3A     | Ribosomal Protein S3A                                     | Protein Coding | 42 | GC04P151099 | 4.758105 | <a href="https://www.genecards.org/cgi-bin/carddisp.pl?gene=RPS3A">https://www.genecards.org/cgi-bin/carddisp.pl?gene=RPS3A</a>         |
| NPY4R     | Neuropeptide Y Receptor Y4                                | Protein Coding | 37 | GC10M046461 | 4.756795 | <a href="https://www.genecards.org/cgi-bin/carddisp.pl?gene=NPY4R">https://www.genecards.org/cgi-bin/carddisp.pl?gene=NPY4R</a>         |
| TNFRSF10D | TNF Receptor Superfamily Member 10d                       | Protein Coding | 43 | GC08M023135 | 4.756449 | <a href="https://www.genecards.org/cgi-bin/carddisp.pl?gene=TNFRSF10D">https://www.genecards.org/cgi-bin/carddisp.pl?gene=TNFRSF10D</a> |
| SLC35B2   | Solute Carrier Family 35 Member B2                        | Protein Coding | 40 | GC06M044254 | 4.751011 | <a href="https://www.genecards.org/cgi-bin/carddisp.pl?gene=SLC35B2">https://www.genecards.org/cgi-bin/carddisp.pl?gene=SLC35B2</a>     |
| TRAIP     | TRAF Interacting Protein<br>Epidermal                     | Protein Coding | 41 | GC03M050057 | 4.748334 | <a href="https://www.genecards.org/cgi-bin/carddisp.pl?gene=TRAIP">https://www.genecards.org/cgi-bin/carddisp.pl?gene=TRAIP</a>         |
| EPS15     | Growth Factor Receptor Pathway Substrate 15               | Protein Coding | 46 | GC01M051354 | 4.747359 | <a href="https://www.genecards.org/cgi-bin/carddisp.pl?gene=EPS15">https://www.genecards.org/cgi-bin/carddisp.pl?gene=EPS15</a>         |
| TEKT3     | Tektin 3                                                  | Protein Coding | 35 | GC17M015303 | 4.746962 | <a href="https://www.genecards.org/cgi-bin/carddisp.pl?gene=TEKT3">https://www.genecards.org/cgi-bin/carddisp.pl?gene=TEKT3</a>         |
| PCM1      | Pericentriolar Material 1<br>Ubiquitin A-52               | Protein Coding | 43 | GC08P017922 | 4.744633 | <a href="https://www.genecards.org/cgi-bin/carddisp.pl?gene=PCM1">https://www.genecards.org/cgi-bin/carddisp.pl?gene=PCM1</a>           |
| UBA52     | Residue Ribosomal Protein Fusion Product 1                | Protein Coding | 41 | GC19P018563 | 4.743694 | <a href="https://www.genecards.org/cgi-bin/carddisp.pl?gene=UBA52">https://www.genecards.org/cgi-bin/carddisp.pl?gene=UBA52</a>         |
| RPL4      | Ribosomal Protein L4                                      | Protein Coding | 43 | GC15M066498 | 4.740825 | <a href="https://www.genecards.org/cgi-bin/carddisp.pl?gene=RPL4">https://www.genecards.org/cgi-bin/carddisp.pl?gene=RPL4</a>           |
| PLK4      | Polo Like Kinase 4                                        | Protein Coding | 48 | GC04P127880 | 4.740572 | <a href="https://www.genecards.org/cgi-bin/carddisp.pl?gene=PLK4">https://www.genecards.org/cgi-bin/carddisp.pl?gene=PLK4</a>           |
| INTS4     | Integrator Complex Subunit 4                              | Protein Coding | 37 | GC11M077878 | 4.737488 | <a href="https://www.genecards.org/cgi-bin/carddisp.pl?gene=INTS4">https://www.genecards.org/cgi-bin/carddisp.pl?gene=INTS4</a>         |
| RPL8      | Ribosomal Protein L8                                      | Protein Coding | 42 | GC08M144821 | 4.734969 | <a href="https://www.genecards.org/cgi-bin/carddisp.pl?gene=RPL8">https://www.genecards.org/cgi-bin/carddisp.pl?gene=RPL8</a>           |
| TAS2R38   | Taste 2 Receptor Member 38                                | Protein Coding | 36 | GC07M141972 | 4.734341 | <a href="https://www.genecards.org/cgi-bin/carddisp.pl?gene=TAS2R38">https://www.genecards.org/cgi-bin/carddisp.pl?gene=TAS2R38</a>     |
| STC1      | Stanniocalcin 1                                           | Protein Coding | 41 | GC08M023841 | 4.730952 | <a href="https://www.genecards.org/cgi-bin/carddisp.pl?gene=STC1">https://www.genecards.org/cgi-bin/carddisp.pl?gene=STC1</a>           |

|          |                                                             |                |    |             |          |                                                                                                                                       |
|----------|-------------------------------------------------------------|----------------|----|-------------|----------|---------------------------------------------------------------------------------------------------------------------------------------|
| PRRC2A   | Proline Rich Coiled-Coil 2A                                 | Protein Coding | 33 | GC06P055204 | 4.730647 | <a href="https://www.genecards.org/cgi-bin/carddisp.pl?gene=PRRC2A">https://www.genecards.org/cgi-bin/carddisp.pl?gene=PRRC2A</a>     |
| LDB1     | LIM Domain Binding 1                                        | Protein Coding | 40 | GC10M102106 | 4.727544 | <a href="https://www.genecards.org/cgi-bin/carddisp.pl?gene=LDB1">https://www.genecards.org/cgi-bin/carddisp.pl?gene=LDB1</a>         |
| HNRNPL   | Heterogeneous Nuclear Ribonucleoprotein L                   | Protein Coding | 40 | GC19M038836 | 4.727404 | <a href="https://www.genecards.org/cgi-bin/carddisp.pl?gene=HNRNPL">https://www.genecards.org/cgi-bin/carddisp.pl?gene=HNRNPL</a>     |
| MAPKAPK5 | MAPK Activated Protein Kinase 5                             | Protein Coding | 45 | GC12P111842 | 4.727202 | <a href="https://www.genecards.org/cgi-bin/carddisp.pl?gene=MAPKAPK5">https://www.genecards.org/cgi-bin/carddisp.pl?gene=MAPKAPK5</a> |
| ANKS1A   | Ankyrin Repeat And Sterile Alpha Motif Domain Containing 1A | Protein Coding | 36 | GC06P055319 | 4.726923 | <a href="https://www.genecards.org/cgi-bin/carddisp.pl?gene=ANKS1A">https://www.genecards.org/cgi-bin/carddisp.pl?gene=ANKS1A</a>     |
| AP2A2    | Adaptor Related Protein Complex 2 Subunit Alpha 2           | Protein Coding | 38 | GC11P000924 | 4.715266 | <a href="https://www.genecards.org/cgi-bin/carddisp.pl?gene=AP2A2">https://www.genecards.org/cgi-bin/carddisp.pl?gene=AP2A2</a>       |
| RBBP4    | RB Binding Protein 4, Chromatin Remodeling Factor           | Protein Coding | 44 | GC01P032651 | 4.71513  | <a href="https://www.genecards.org/cgi-bin/carddisp.pl?gene=RBBP4">https://www.genecards.org/cgi-bin/carddisp.pl?gene=RBBP4</a>       |
| MAL      | Mal, T Cell Differentiation Protein                         | Protein Coding | 38 | GC02P095025 | 4.71438  | <a href="https://www.genecards.org/cgi-bin/carddisp.pl?gene=MAL">https://www.genecards.org/cgi-bin/carddisp.pl?gene=MAL</a>           |
| C1QTNF1  | C1q And TNF Related 1                                       | Protein Coding | 40 | GC17P079022 | 4.713194 | <a href="https://www.genecards.org/cgi-bin/carddisp.pl?gene=C1QTNF1">https://www.genecards.org/cgi-bin/carddisp.pl?gene=C1QTNF1</a>   |
| POLR3H   | RNA Polymerase III Subunit H                                | Protein Coding | 38 | GC22M041525 | 4.711223 | <a href="https://www.genecards.org/cgi-bin/carddisp.pl?gene=POLR3H">https://www.genecards.org/cgi-bin/carddisp.pl?gene=POLR3H</a>     |
| CCT4     | Chaperonin Containing TCP1 Subunit 4                        | Protein Coding | 40 | GC02M061868 | 4.703442 | <a href="https://www.genecards.org/cgi-bin/carddisp.pl?gene=CCT4">https://www.genecards.org/cgi-bin/carddisp.pl?gene=CCT4</a>         |
| BICD1    | BICD Cargo Adaptor 1                                        | Protein Coding | 40 | GC12P032107 | 4.702754 | <a href="https://www.genecards.org/cgi-bin/carddisp.pl?gene=BICD1">https://www.genecards.org/cgi-bin/carddisp.pl?gene=BICD1</a>       |
| EIF2S2   | Eukaryotic Translation Initiation Factor 2 Subunit Beta     | Protein Coding | 41 | GC20M034088 | 4.700258 | <a href="https://www.genecards.org/cgi-bin/carddisp.pl?gene=EIF2S2">https://www.genecards.org/cgi-bin/carddisp.pl?gene=EIF2S2</a>     |
| SLC15A2  | Solute Carrier Family 15 Member 2                           | Protein Coding | 40 | GC03P121894 | 4.698466 | <a href="https://www.genecards.org/cgi-bin/carddisp.pl?gene=SLC15A2">https://www.genecards.org/cgi-bin/carddisp.pl?gene=SLC15A2</a>   |
| BACH1    | BTB Domain And CNC Homolog 1                                | Protein Coding | 42 | GC21P029194 | 4.694157 | <a href="https://www.genecards.org/cgi-bin/carddisp.pl?gene=BACH1">https://www.genecards.org/cgi-bin/carddisp.pl?gene=BACH1</a>       |
| SQLE     | Squalene Epoxidase                                          | Protein Coding | 44 | GC08P124998 | 4.693421 | <a href="https://www.genecards.org/cgi-bin/carddisp.pl?gene=SQLE">https://www.genecards.org/cgi-bin/carddisp.pl?gene=SQLE</a>         |

|         |                                                                                        |                |    |             |          |                                                                                                                                     |
|---------|----------------------------------------------------------------------------------------|----------------|----|-------------|----------|-------------------------------------------------------------------------------------------------------------------------------------|
| HTR6    | 5-Hydroxytryptamine Receptor 6                                                         | Protein Coding | 44 | GC01P019666 | 4.6865   | <a href="https://www.genecards.org/cgi-bin/carddisp.pl?gene=HTR6">https://www.genecards.org/cgi-bin/carddisp.pl?gene=HTR6</a>       |
| PXYLP1  | 2-Phosphoxylose Phosphatase 1 Protein                                                  | Protein Coding | 32 | GC03P141228 | 4.681754 | <a href="https://www.genecards.org/cgi-bin/carddisp.pl?gene=PXYLP1">https://www.genecards.org/cgi-bin/carddisp.pl?gene=PXYLP1</a>   |
| PPP1R17 | Phosphatase 1 Regulatory Subunit 17                                                    | Protein Coding | 38 | GC07P031726 | 4.67995  | <a href="https://www.genecards.org/cgi-bin/carddisp.pl?gene=PPP1R17">https://www.genecards.org/cgi-bin/carddisp.pl?gene=PPP1R17</a> |
| GLTP    | Glycolipid Transfer Protein                                                            | Protein Coding | 37 | GC12M109850 | 4.679826 | <a href="https://www.genecards.org/cgi-bin/carddisp.pl?gene=GLTP">https://www.genecards.org/cgi-bin/carddisp.pl?gene=GLTP</a>       |
| TANK    | TRAF Family Member Associated NFKB Activator                                           | Protein Coding | 44 | GC02P161136 | 4.678485 | <a href="https://www.genecards.org/cgi-bin/carddisp.pl?gene=TANK">https://www.genecards.org/cgi-bin/carddisp.pl?gene=TANK</a>       |
| RPS3    | Ribosomal Protein S3                                                                   | Protein Coding | 45 | GC11P076260 | 4.677998 | <a href="https://www.genecards.org/cgi-bin/carddisp.pl?gene=RPS3">https://www.genecards.org/cgi-bin/carddisp.pl?gene=RPS3</a>       |
| RANGAP1 | Ran GTPase Activating Protein 1                                                        | Protein Coding | 43 | GC22M041244 | 4.677173 | <a href="https://www.genecards.org/cgi-bin/carddisp.pl?gene=RANGAP1">https://www.genecards.org/cgi-bin/carddisp.pl?gene=RANGAP1</a> |
| EIF4A1  | Eukaryotic Translation Initiation Factor 4A1                                           | Protein Coding | 45 | GC17P007572 | 4.676231 | <a href="https://www.genecards.org/cgi-bin/carddisp.pl?gene=EIF4A1">https://www.genecards.org/cgi-bin/carddisp.pl?gene=EIF4A1</a>   |
| C4BPA   | Complement Component 4 Binding Protein Alpha Protein                                   | Protein Coding | 41 | GC01P207105 | 4.665201 | <a href="https://www.genecards.org/cgi-bin/carddisp.pl?gene=C4BPA">https://www.genecards.org/cgi-bin/carddisp.pl?gene=C4BPA</a>     |
| PDIA4   | Disulfide Isomerase Family A Member 4                                                  | Protein Coding | 43 | GC07M149003 | 4.662331 | <a href="https://www.genecards.org/cgi-bin/carddisp.pl?gene=PDIA4">https://www.genecards.org/cgi-bin/carddisp.pl?gene=PDIA4</a>     |
| STK24   | Serine/Threonine Kinase 24                                                             | Protein Coding | 45 | GC13M098445 | 4.662202 | <a href="https://www.genecards.org/cgi-bin/carddisp.pl?gene=STK24">https://www.genecards.org/cgi-bin/carddisp.pl?gene=STK24</a>     |
| SCG2    | Secretogranin II                                                                       | Protein Coding | 40 | GC02M223596 | 4.661969 | <a href="https://www.genecards.org/cgi-bin/carddisp.pl?gene=SCG2">https://www.genecards.org/cgi-bin/carddisp.pl?gene=SCG2</a>       |
| PGAM5   | PGAM Family Member 5, Mitochondrial Serine/Threonine Protein Phosphatase SPARC Related | Protein Coding | 34 | GC12P132710 | 4.66085  | <a href="https://www.genecards.org/cgi-bin/carddisp.pl?gene=PGAM5">https://www.genecards.org/cgi-bin/carddisp.pl?gene=PGAM5</a>     |
| SMOC1   | Modular Calcium Binding 1                                                              | Protein Coding | 41 | GC14P069854 | 4.660049 | <a href="https://www.genecards.org/cgi-bin/carddisp.pl?gene=SMOC1">https://www.genecards.org/cgi-bin/carddisp.pl?gene=SMOC1</a>     |
| CDC16   | Cell Division Cycle 16                                                                 | Protein Coding | 40 | GC13P114234 | 4.659441 | <a href="https://www.genecards.org/cgi-bin/carddisp.pl?gene=CDC16">https://www.genecards.org/cgi-bin/carddisp.pl?gene=CDC16</a>     |
| AGFG1   | ArfGAP With FG Repeats 1                                                               | Protein Coding | 40 | GC02P227473 | 4.659343 | <a href="https://www.genecards.org/cgi-bin/carddisp.pl?gene=AGFG1">https://www.genecards.org/cgi-bin/carddisp.pl?gene=AGFG1</a>     |
| ANAPC1  | Anaphase Promoting Complex Subunit 1                                                   | Protein Coding | 41 | GC02M111611 | 4.656997 | <a href="https://www.genecards.org/cgi-bin/carddisp.pl?gene=ANAPC1">https://www.genecards.org/cgi-bin/carddisp.pl?gene=ANAPC1</a>   |



|         |                                                                                                                                                            |                   |    |                 |          |                                                                                                                                     |
|---------|------------------------------------------------------------------------------------------------------------------------------------------------------------|-------------------|----|-----------------|----------|-------------------------------------------------------------------------------------------------------------------------------------|
| MDM4    | MDM4<br>Regulator Of<br>p53                                                                                                                                | Protein<br>Coding | 45 | GC01P2045<br>16 | 4.656155 | <a href="https://www.genecards.org/cgi-bin/carddisp.pl?gene=MDM4">https://www.genecards.org/cgi-bin/carddisp.pl?gene=MDM4</a>       |
| RASIP1  | Ras Interacting<br>Protein 1                                                                                                                               | Protein<br>Coding | 37 | GC19M048<br>720 | 4.655036 | <a href="https://www.genecards.org/cgi-bin/carddisp.pl?gene=RASIP1">https://www.genecards.org/cgi-bin/carddisp.pl?gene=RASIP1</a>   |
| CDR2    | Cerebellar<br>Degeneration<br>Related Protein<br>2                                                                                                         | Protein<br>Coding | 39 | GC16M022<br>357 | 4.650725 | <a href="https://www.genecards.org/cgi-bin/carddisp.pl?gene=CDR2">https://www.genecards.org/cgi-bin/carddisp.pl?gene=CDR2</a>       |
| MYO1D   | Myosin ID                                                                                                                                                  | Protein<br>Coding | 40 | GC17M032<br>492 | 4.650517 | <a href="https://www.genecards.org/cgi-bin/carddisp.pl?gene=MYO1D">https://www.genecards.org/cgi-bin/carddisp.pl?gene=MYO1D</a>     |
| CDC25B  | Cell Division<br>Cycle 25B                                                                                                                                 | Protein<br>Coding | 47 | GC20P0037<br>94 | 4.64867  | <a href="https://www.genecards.org/cgi-bin/carddisp.pl?gene=CDC25B">https://www.genecards.org/cgi-bin/carddisp.pl?gene=CDC25B</a>   |
| USP1    | Ubiquitin<br>Specific<br>Peptidase 1                                                                                                                       | Protein<br>Coding | 45 | GC01P0624<br>36 | 4.647277 | <a href="https://www.genecards.org/cgi-bin/carddisp.pl?gene=USP1">https://www.genecards.org/cgi-bin/carddisp.pl?gene=USP1</a>       |
| PSG1    | Pregnancy<br>Specific Beta-<br>1-Glycoprotein<br>1                                                                                                         | Protein<br>Coding | 39 | GC19M042<br>866 | 4.643477 | <a href="https://www.genecards.org/cgi-bin/carddisp.pl?gene=PSG1">https://www.genecards.org/cgi-bin/carddisp.pl?gene=PSG1</a>       |
| GART    | Phosphoribosyl<br>glycinamide<br>Formyltransfera<br>se,<br>Phosphoribosyl<br>glycinamide<br>Synthetase,<br>Phosphoribosyl<br>aminoimidazol<br>e Synthetase | Protein<br>Coding | 43 | GC21M033<br>503 | 4.642777 | <a href="https://www.genecards.org/cgi-bin/carddisp.pl?gene=GART">https://www.genecards.org/cgi-bin/carddisp.pl?gene=GART</a>       |
| TFPT    | TCF3 Fusion<br>Partner                                                                                                                                     | Protein<br>Coding | 36 | GC19M054<br>107 | 4.637411 | <a href="https://www.genecards.org/cgi-bin/carddisp.pl?gene=TFPT">https://www.genecards.org/cgi-bin/carddisp.pl?gene=TFPT</a>       |
| BAG6    | BAG<br>Cochaperone 6                                                                                                                                       | Protein<br>Coding | 36 | GC06M031<br>639 | 4.63588  | <a href="https://www.genecards.org/cgi-bin/carddisp.pl?gene=BAG6">https://www.genecards.org/cgi-bin/carddisp.pl?gene=BAG6</a>       |
| UBE2D3  | Ubiquitin<br>Conjugating<br>Enzyme E2 D3                                                                                                                   | Protein<br>Coding | 47 | GC04M102<br>794 | 4.634063 | <a href="https://www.genecards.org/cgi-bin/carddisp.pl?gene=UBE2D3">https://www.genecards.org/cgi-bin/carddisp.pl?gene=UBE2D3</a>   |
| AGR2    | Anterior<br>Gradient 2,<br>Protein<br>Disulphide<br>Isomerase<br>Family Member                                                                             | Protein<br>Coding | 41 | GC07M016<br>892 | 4.630882 | <a href="https://www.genecards.org/cgi-bin/carddisp.pl?gene=AGR2">https://www.genecards.org/cgi-bin/carddisp.pl?gene=AGR2</a>       |
| TMBIM1  | Transmembran<br>e BAX Inhibitor<br>Motif<br>Containing 1                                                                                                   | Protein<br>Coding | 36 | GC02M218<br>274 | 4.627502 | <a href="https://www.genecards.org/cgi-bin/carddisp.pl?gene=TMBIM1">https://www.genecards.org/cgi-bin/carddisp.pl?gene=TMBIM1</a>   |
| GANC    | Glucosidase<br>Alpha, Neutral<br>C                                                                                                                         | Protein<br>Coding | 37 | GC15P0422<br>73 | 4.622423 | <a href="https://www.genecards.org/cgi-bin/carddisp.pl?gene=GANC">https://www.genecards.org/cgi-bin/carddisp.pl?gene=GANC</a>       |
| S1PR3   | Sphingosine-<br>1-Phosphate<br>Receptor 3                                                                                                                  | Protein<br>Coding | 45 | GC09P0889<br>91 | 4.62067  | <a href="https://www.genecards.org/cgi-bin/carddisp.pl?gene=S1PR3">https://www.genecards.org/cgi-bin/carddisp.pl?gene=S1PR3</a>     |
| SLC24A5 | Solute Carrier<br>Family 24<br>Member 5                                                                                                                    | Protein<br>Coding | 41 | GC15P0481<br>20 | 4.620585 | <a href="https://www.genecards.org/cgi-bin/carddisp.pl?gene=SLC24A5">https://www.genecards.org/cgi-bin/carddisp.pl?gene=SLC24A5</a> |

|          |                                                            |                |    |             |          |                                                                                                                                       |
|----------|------------------------------------------------------------|----------------|----|-------------|----------|---------------------------------------------------------------------------------------------------------------------------------------|
| CD83     | CD83 Molecule RB                                           | Protein Coding | 40 | GC06P014117 | 4.618192 | <a href="https://www.genecards.org/cgi-bin/carddisp.pl?gene=CD83">https://www.genecards.org/cgi-bin/carddisp.pl?gene=CD83</a>         |
| RBL2     | Transcriptional Corepressor Like 2                         | Protein Coding | 44 | GC16P053433 | 4.617309 | <a href="https://www.genecards.org/cgi-bin/carddisp.pl?gene=RBL2">https://www.genecards.org/cgi-bin/carddisp.pl?gene=RBL2</a>         |
| SLC7A1   | Solute Carrier Family 7 Member 1                           | Protein Coding | 44 | GC13M029509 | 4.615957 | <a href="https://www.genecards.org/cgi-bin/carddisp.pl?gene=SLC7A1">https://www.genecards.org/cgi-bin/carddisp.pl?gene=SLC7A1</a>     |
| RETSAT   | Retinol Saturase                                           | Protein Coding | 38 | GC02M085344 | 4.613746 | <a href="https://www.genecards.org/cgi-bin/carddisp.pl?gene=RETSAT">https://www.genecards.org/cgi-bin/carddisp.pl?gene=RETSAT</a>     |
| GUCA2A   | Guanylate Cyclase Activator 2A                             | Protein Coding | 38 | GC01M042162 | 4.610352 | <a href="https://www.genecards.org/cgi-bin/carddisp.pl?gene=GUCA2A">https://www.genecards.org/cgi-bin/carddisp.pl?gene=GUCA2A</a>     |
| TXNL1    | Thioredoxin Like 1                                         | Protein Coding | 40 | GC18M056597 | 4.604498 | <a href="https://www.genecards.org/cgi-bin/carddisp.pl?gene=TXNL1">https://www.genecards.org/cgi-bin/carddisp.pl?gene=TXNL1</a>       |
| KPNA3    | Karyopherin Subunit Alpha 3                                | Protein Coding | 43 | GC13M049699 | 4.601851 | <a href="https://www.genecards.org/cgi-bin/carddisp.pl?gene=KPNA3">https://www.genecards.org/cgi-bin/carddisp.pl?gene=KPNA3</a>       |
| SETD1B   | SET Domain Containing 1B, Histone Lysine Methyltransferase | Protein Coding | 37 | GC12P123586 | 4.599613 | <a href="https://www.genecards.org/cgi-bin/carddisp.pl?gene=SETD1B">https://www.genecards.org/cgi-bin/carddisp.pl?gene=SETD1B</a>     |
| MED24    | Mediator Complex Subunit 24                                | Protein Coding | 37 | GC17M040019 | 4.599255 | <a href="https://www.genecards.org/cgi-bin/carddisp.pl?gene=MED24">https://www.genecards.org/cgi-bin/carddisp.pl?gene=MED24</a>       |
| STX17    | Syntaxin 17                                                | Protein Coding | 36 | GC09P099906 | 4.597912 | <a href="https://www.genecards.org/cgi-bin/carddisp.pl?gene=STX17">https://www.genecards.org/cgi-bin/carddisp.pl?gene=STX17</a>       |
| NKX2-8   | NK2 Homeobox 8                                             | Protein Coding | 37 | GC14M036580 | 4.597596 | <a href="https://www.genecards.org/cgi-bin/carddisp.pl?gene=NKX2-8">https://www.genecards.org/cgi-bin/carddisp.pl?gene=NKX2-8</a>     |
| SLC9A3R2 | SLC9A3 Regulator 2                                         | Protein Coding | 40 | GC16P005577 | 4.597387 | <a href="https://www.genecards.org/cgi-bin/carddisp.pl?gene=SLC9A3R2">https://www.genecards.org/cgi-bin/carddisp.pl?gene=SLC9A3R2</a> |
| SNX6     | Sorting Nexin 6                                            | Protein Coding | 37 | GC14M034561 | 4.591009 | <a href="https://www.genecards.org/cgi-bin/carddisp.pl?gene=SNX6">https://www.genecards.org/cgi-bin/carddisp.pl?gene=SNX6</a>         |
| SEL1L3   | SEL1L Family Member 3                                      | Protein Coding | 33 | GC04M025715 | 4.589505 | <a href="https://www.genecards.org/cgi-bin/carddisp.pl?gene=SEL1L3">https://www.genecards.org/cgi-bin/carddisp.pl?gene=SEL1L3</a>     |
| DHRS11   | Dehydrogenase /Reductase 11                                | Protein Coding | 37 | GC17P036888 | 4.587685 | <a href="https://www.genecards.org/cgi-bin/carddisp.pl?gene=DHRS11">https://www.genecards.org/cgi-bin/carddisp.pl?gene=DHRS11</a>     |
| AGAP1    | ArfGAP With GTPase Domain, Ankyrin Repeat And PH Domain 1  | Protein Coding | 41 | GC02P235494 | 4.579213 | <a href="https://www.genecards.org/cgi-bin/carddisp.pl?gene=AGAP1">https://www.genecards.org/cgi-bin/carddisp.pl?gene=AGAP1</a>       |
| PEDS1    | Plasmanylethanolamine Desaturase 1                         | Protein Coding | 26 | GC20M050119 | 4.572634 | <a href="https://www.genecards.org/cgi-bin/carddisp.pl?gene=PEDS1">https://www.genecards.org/cgi-bin/carddisp.pl?gene=PEDS1</a>       |
| PKD1     | Pyruvate Dehydrogenase Kinase 1                            | Protein Coding | 47 | GC02P172555 | 4.572374 | <a href="https://www.genecards.org/cgi-bin/carddisp.pl?gene=PKD1">https://www.genecards.org/cgi-bin/carddisp.pl?gene=PKD1</a>         |
| RUVBL1   | RuvB Like AAA ATPase 1                                     | Protein Coding | 45 | GC03M128064 | 4.571053 | <a href="https://www.genecards.org/cgi-bin/carddisp.pl?gene=RUVBL1">https://www.genecards.org/cgi-bin/carddisp.pl?gene=RUVBL1</a>     |
| RPS13    | Ribosomal Protein S13                                      | Protein Coding | 43 | GC11M017274 | 4.570422 | <a href="https://www.genecards.org/cgi-bin/carddisp.pl?gene=RPS13">https://www.genecards.org/cgi-bin/carddisp.pl?gene=RPS13</a>       |

|              |                                                      |                   |    |             |          |                                                                                                                                               |
|--------------|------------------------------------------------------|-------------------|----|-------------|----------|-----------------------------------------------------------------------------------------------------------------------------------------------|
| MED15        | Mediator Complex Subunit 15                          | Protein Coding    | 40 | GC22P020506 | 4.567909 | <a href="https://www.genecards.org/cgi-bin/carddisp.pl?gene=MED15">https://www.genecards.org/cgi-bin/carddisp.pl?gene=MED15</a>               |
| COPB1        | COPI Coat Complex Subunit Beta 1                     | Protein Coding    | 39 | GC11M014436 | 4.564624 | <a href="https://www.genecards.org/cgi-bin/carddisp.pl?gene=COPB1">https://www.genecards.org/cgi-bin/carddisp.pl?gene=COPB1</a>               |
| SLC25A2      | Solute Carrier Family 25 Member 2 Phosphate          | Protein Coding    | 34 | GC05M141302 | 4.563865 | <a href="https://www.genecards.org/cgi-bin/carddisp.pl?gene=SLC25A2">https://www.genecards.org/cgi-bin/carddisp.pl?gene=SLC25A2</a>           |
| PCYT2        | Cytidylyltransferase 2, Ethanolamine                 | Protein Coding    | 43 | GC17M081900 | 4.562902 | <a href="https://www.genecards.org/cgi-bin/carddisp.pl?gene=PCYT2">https://www.genecards.org/cgi-bin/carddisp.pl?gene=PCYT2</a>               |
| SFXN4        | Sideroflexin 4                                       | Protein Coding    | 41 | GC10M119140 | 4.554611 | <a href="https://www.genecards.org/cgi-bin/carddisp.pl?gene=SFXN4">https://www.genecards.org/cgi-bin/carddisp.pl?gene=SFXN4</a>               |
| CEBPD        | CCAAT Enhancer Binding Protein Delta                 | Protein Coding    | 38 | GC08M047759 | 4.550325 | <a href="https://www.genecards.org/cgi-bin/carddisp.pl?gene=CEBPD">https://www.genecards.org/cgi-bin/carddisp.pl?gene=CEBPD</a>               |
| TACC2        | Transforming Acidic Coiled-Coil Containing Protein 2 | Protein Coding    | 38 | GC10P121989 | 4.545766 | <a href="https://www.genecards.org/cgi-bin/carddisp.pl?gene=TACC2">https://www.genecards.org/cgi-bin/carddisp.pl?gene=TACC2</a>               |
| EXOSC10      | Exosome Component 10                                 | Protein Coding    | 39 | GC01M011067 | 4.542109 | <a href="https://www.genecards.org/cgi-bin/carddisp.pl?gene=EXOSC10">https://www.genecards.org/cgi-bin/carddisp.pl?gene=EXOSC10</a>           |
| CADM2        | Cell Adhesion Molecule 2                             | Protein Coding    | 37 | GC03P085008 | 4.54075  | <a href="https://www.genecards.org/cgi-bin/carddisp.pl?gene=CADM2">https://www.genecards.org/cgi-bin/carddisp.pl?gene=CADM2</a>               |
| COX6C        | Cytochrome C Oxidase Subunit 6C                      | Protein Coding    | 40 | GC08M099899 | 4.54062  | <a href="https://www.genecards.org/cgi-bin/carddisp.pl?gene=COX6C">https://www.genecards.org/cgi-bin/carddisp.pl?gene=COX6C</a>               |
| CCNT1        | Cyclin T1                                            | Protein Coding    | 41 | GC12M048688 | 4.539225 | <a href="https://www.genecards.org/cgi-bin/carddisp.pl?gene=CCNT1">https://www.genecards.org/cgi-bin/carddisp.pl?gene=CCNT1</a>               |
| WASL         | WASP Like Actin Nucleation Promoting Factor          | Protein Coding    | 43 | GC07M123681 | 4.538745 | <a href="https://www.genecards.org/cgi-bin/carddisp.pl?gene=WASL">https://www.genecards.org/cgi-bin/carddisp.pl?gene=WASL</a>                 |
| SNRPD2       | Small Nuclear Ribonucleoprotein D2 Polypeptide       | Protein Coding    | 41 | GC19M046999 | 4.537465 | <a href="https://www.genecards.org/cgi-bin/carddisp.pl?gene=SNRPD2">https://www.genecards.org/cgi-bin/carddisp.pl?gene=SNRPD2</a>             |
| LOC110366354 | CYP3A4 5' Regulatory Region                          | Biological Region | 1  | GC07P099784 | 4.537452 | <a href="https://www.genecards.org/cgi-bin/carddisp.pl?gene=LOC110366354">https://www.genecards.org/cgi-bin/carddisp.pl?gene=LOC110366354</a> |
| PDE7B        | Phosphodiesterase 7B                                 | Protein Coding    | 39 | GC06P135795 | 4.536767 | <a href="https://www.genecards.org/cgi-bin/carddisp.pl?gene=PDE7B">https://www.genecards.org/cgi-bin/carddisp.pl?gene=PDE7B</a>               |
| MANF         | Mesencephalic Astrocyte Derived Neurotrophic Factor  | Protein Coding    | 40 | GC03P051385 | 4.53442  | <a href="https://www.genecards.org/cgi-bin/carddisp.pl?gene=MANF">https://www.genecards.org/cgi-bin/carddisp.pl?gene=MANF</a>                 |
| BCAS3        | BCAS3 Microtubule Associated Cell Migration Factor   | Protein Coding    | 37 | GC17P060678 | 4.533676 | <a href="https://www.genecards.org/cgi-bin/carddisp.pl?gene=BCAS3">https://www.genecards.org/cgi-bin/carddisp.pl?gene=BCAS3</a>               |

|         |                                                                      |                |    |             |          |                                                                                                                                     |
|---------|----------------------------------------------------------------------|----------------|----|-------------|----------|-------------------------------------------------------------------------------------------------------------------------------------|
| NSMF    | NMDA Receptor Synaptonuclear Signaling And Neuronal Migration Factor | Protein Coding | 38 | GC09M137447 | 4.533435 | <a href="https://www.genecards.org/cgi-bin/carddisp.pl?gene=NSMF">https://www.genecards.org/cgi-bin/carddisp.pl?gene=NSMF</a>       |
| ACTR2   | Actin Related Protein 2                                              | Protein Coding | 44 | GC02P065227 | 4.530648 | <a href="https://www.genecards.org/cgi-bin/carddisp.pl?gene=ACTR2">https://www.genecards.org/cgi-bin/carddisp.pl?gene=ACTR2</a>     |
| ALPK1   | Alpha Kinase 1                                                       | Protein Coding | 40 | GC04P112285 | 4.528509 | <a href="https://www.genecards.org/cgi-bin/carddisp.pl?gene=ALPK1">https://www.genecards.org/cgi-bin/carddisp.pl?gene=ALPK1</a>     |
| TRIM22  | Tripartite Motif Containing 22                                       | Protein Coding | 40 | GC11P005689 | 4.528236 | <a href="https://www.genecards.org/cgi-bin/carddisp.pl?gene=TRIM22">https://www.genecards.org/cgi-bin/carddisp.pl?gene=TRIM22</a>   |
| MIR198  | MicroRNA 198                                                         | RNA Gene       | 16 | GC03M120395 | 4.52667  | <a href="https://www.genecards.org/cgi-bin/carddisp.pl?gene=MIR198">https://www.genecards.org/cgi-bin/carddisp.pl?gene=MIR198</a>   |
| NDUFB4  | NADH:Ubiquinone Oxidoreductase Subunit B4                            | Protein Coding | 41 | GC03P120596 | 4.522985 | <a href="https://www.genecards.org/cgi-bin/carddisp.pl?gene=NDUFB4">https://www.genecards.org/cgi-bin/carddisp.pl?gene=NDUFB4</a>   |
| CST6    | Cystatin E/M                                                         | Protein Coding | 40 | GC11P066311 | 4.521043 | <a href="https://www.genecards.org/cgi-bin/carddisp.pl?gene=CST6">https://www.genecards.org/cgi-bin/carddisp.pl?gene=CST6</a>       |
| FAT1    | FAT Atypical Cadherin 1                                              | Protein Coding | 40 | GC04M186587 | 4.509996 | <a href="https://www.genecards.org/cgi-bin/carddisp.pl?gene=FAT1">https://www.genecards.org/cgi-bin/carddisp.pl?gene=FAT1</a>       |
| MTIF2   | Mitochondrial Translational Initiation Factor 2                      | Protein Coding | 40 | GC02M055236 | 4.509862 | <a href="https://www.genecards.org/cgi-bin/carddisp.pl?gene=MTIF2">https://www.genecards.org/cgi-bin/carddisp.pl?gene=MTIF2</a>     |
| FIBP    | FGF1 Intracellular Binding Protein                                   | Protein Coding | 41 | GC11M069430 | 4.509194 | <a href="https://www.genecards.org/cgi-bin/carddisp.pl?gene=FIBP">https://www.genecards.org/cgi-bin/carddisp.pl?gene=FIBP</a>       |
| NUCB2   | Nucleobindin 2                                                       | Protein Coding | 39 | GC11P017237 | 4.508267 | <a href="https://www.genecards.org/cgi-bin/carddisp.pl?gene=NUCB2">https://www.genecards.org/cgi-bin/carddisp.pl?gene=NUCB2</a>     |
| MBD2    | Methyl-CpG Binding Domain Protein 2                                  | Protein Coding | 41 | GC18M054151 | 4.506716 | <a href="https://www.genecards.org/cgi-bin/carddisp.pl?gene=MBD2">https://www.genecards.org/cgi-bin/carddisp.pl?gene=MBD2</a>       |
| CAND1   | Cullin Associated And Neddylation Dissociated 1                      | Protein Coding | 39 | GC12P067270 | 4.506351 | <a href="https://www.genecards.org/cgi-bin/carddisp.pl?gene=CAND1">https://www.genecards.org/cgi-bin/carddisp.pl?gene=CAND1</a>     |
| PTPRN2  | Protein Tyrosine Phosphatase Receptor Type N2                        | Protein Coding | 45 | GC07M157539 | 4.505263 | <a href="https://www.genecards.org/cgi-bin/carddisp.pl?gene=PTPRN2">https://www.genecards.org/cgi-bin/carddisp.pl?gene=PTPRN2</a>   |
| PPP1CC  | Protein Phosphatase 1 Catalytic Subunit Gamma                        | Protein Coding | 46 | GC12M110709 | 4.50234  | <a href="https://www.genecards.org/cgi-bin/carddisp.pl?gene=PPP1CC">https://www.genecards.org/cgi-bin/carddisp.pl?gene=PPP1CC</a>   |
| CDR1-AS | CDR1 Antisense RNA                                                   | RNA Gene       | 6  | GC0XU902169 | 4.502142 | <a href="https://www.genecards.org/cgi-bin/carddisp.pl?gene=CDR1-AS">https://www.genecards.org/cgi-bin/carddisp.pl?gene=CDR1-AS</a> |
| MACROD1 | Mono-ADP Ribosylhydrolase 1                                          | Protein Coding | 34 | GC11M063998 | 4.498342 | <a href="https://www.genecards.org/cgi-bin/carddisp.pl?gene=MACROD1">https://www.genecards.org/cgi-bin/carddisp.pl?gene=MACROD1</a> |

|              |                                                                                                        |                   |    |                 |          |                                                                                                                                       |
|--------------|--------------------------------------------------------------------------------------------------------|-------------------|----|-----------------|----------|---------------------------------------------------------------------------------------------------------------------------------------|
| YLPM1        | YLP Motif<br>Containing 1                                                                              | Protein<br>Coding | 33 | GC14P0747<br>63 | 4.498254 | <a href="https://www.genecards.org/cgi-bin/carddisp.pl?gene=YLPM1">https://www.genecards.org/cgi-bin/carddisp.pl?gene=YLPM1</a>       |
| TRIM24       | Tripartite Motif<br>Containing 24                                                                      | Protein<br>Coding | 44 | GC07P1384<br>60 | 4.497521 | <a href="https://www.genecards.org/cgi-bin/carddisp.pl?gene=TRIM24">https://www.genecards.org/cgi-bin/carddisp.pl?gene=TRIM24</a>     |
| POLR2D       | RNA<br>Polymerase II<br>Subunit D                                                                      | Protein<br>Coding | 43 | GC02M128<br>042 | 4.497245 | <a href="https://www.genecards.org/cgi-bin/carddisp.pl?gene=POLR2D">https://www.genecards.org/cgi-bin/carddisp.pl?gene=POLR2D</a>     |
| TNRC6B       | Trinucleotide<br>Repeat<br>Containing<br>Adaptor 6B                                                    | Protein<br>Coding | 37 | GC22P0400<br>44 | 4.496908 | <a href="https://www.genecards.org/cgi-bin/carddisp.pl?gene=TNRC6B">https://www.genecards.org/cgi-bin/carddisp.pl?gene=TNRC6B</a>     |
| XAB2         | XPA Binding<br>Protein 2                                                                               | Protein<br>Coding | 38 | GC19M007<br>619 | 4.493793 | <a href="https://www.genecards.org/cgi-bin/carddisp.pl?gene=XAB2">https://www.genecards.org/cgi-bin/carddisp.pl?gene=XAB2</a>         |
| RSRC1        | Arginine And<br>Serine Rich<br>Coiled-Coil 1                                                           | Protein<br>Coding | 40 | GC03P1581<br>05 | 4.492593 | <a href="https://www.genecards.org/cgi-bin/carddisp.pl?gene=RSRC1">https://www.genecards.org/cgi-bin/carddisp.pl?gene=RSRC1</a>       |
| RPL24        | Ribosomal<br>Protein L24                                                                               | Protein<br>Coding | 40 | GC03M101<br>681 | 4.49227  | <a href="https://www.genecards.org/cgi-bin/carddisp.pl?gene=RPL24">https://www.genecards.org/cgi-bin/carddisp.pl?gene=RPL24</a>       |
| APPL2        | Adaptor<br>Protein,<br>Phosphotyrosin<br>e Interacting<br>With PH<br>Domain And<br>Leucine Zipper<br>2 | Protein<br>Coding | 36 | GC12M105<br>173 | 4.491245 | <a href="https://www.genecards.org/cgi-bin/carddisp.pl?gene=APPL2">https://www.genecards.org/cgi-bin/carddisp.pl?gene=APPL2</a>       |
| IL6-AS1      | IL6 Antisense<br>RNA 1                                                                                 | RNA<br>Gene       | 11 | GC07M022<br>728 | 4.488552 | <a href="https://www.genecards.org/cgi-bin/carddisp.pl?gene=IL6-AS1">https://www.genecards.org/cgi-bin/carddisp.pl?gene=IL6-AS1</a>   |
| RNF125       | Ring Finger<br>Protein 125                                                                             | Protein<br>Coding | 42 | GC18P0320<br>25 | 4.486342 | <a href="https://www.genecards.org/cgi-bin/carddisp.pl?gene=RNF125">https://www.genecards.org/cgi-bin/carddisp.pl?gene=RNF125</a>     |
| EIF4B        | Eukaryotic<br>Translation<br>Initiation Factor<br>4B                                                   | Protein<br>Coding | 43 | GC12P0530<br>06 | 4.486102 | <a href="https://www.genecards.org/cgi-bin/carddisp.pl?gene=EIF4B">https://www.genecards.org/cgi-bin/carddisp.pl?gene=EIF4B</a>       |
| CRLS1        | Cardiolipin<br>Synthase 1                                                                              | Protein<br>Coding | 40 | GC20P0060<br>05 | 4.481825 | <a href="https://www.genecards.org/cgi-bin/carddisp.pl?gene=CRLS1">https://www.genecards.org/cgi-bin/carddisp.pl?gene=CRLS1</a>       |
| ENHO         | Energy<br>Homeostasis<br>Associated                                                                    | Protein<br>Coding | 30 | GC09M034<br>516 | 4.481272 | <a href="https://www.genecards.org/cgi-bin/carddisp.pl?gene=ENHO">https://www.genecards.org/cgi-bin/carddisp.pl?gene=ENHO</a>         |
| GCNT2        | Glucosaminyl<br>(N-Acetyl)<br>Transferase 2 (I<br>Blood Group)                                         | Protein<br>Coding | 45 | GC06P0104<br>92 | 4.479461 | <a href="https://www.genecards.org/cgi-bin/carddisp.pl?gene=GCNT2">https://www.genecards.org/cgi-bin/carddisp.pl?gene=GCNT2</a>       |
| LEPROT       | Leptin<br>Receptor<br>Overlapping<br>Transcript                                                        | Protein<br>Coding | 33 | GC01P0654<br>20 | 4.47036  | <a href="https://www.genecards.org/cgi-bin/carddisp.pl?gene=LEPROT">https://www.genecards.org/cgi-bin/carddisp.pl?gene=LEPROT</a>     |
| RDH13        | Retinol<br>Dehydrogenase<br>13                                                                         | Protein<br>Coding | 40 | GC19M055<br>039 | 4.467848 | <a href="https://www.genecards.org/cgi-bin/carddisp.pl?gene=RDH13">https://www.genecards.org/cgi-bin/carddisp.pl?gene=RDH13</a>       |
| MYCBP2       | MYC Binding<br>Protein 2                                                                               | Protein<br>Coding | 38 | GC13M077<br>044 | 4.46719  | <a href="https://www.genecards.org/cgi-bin/carddisp.pl?gene=MYCBP2">https://www.genecards.org/cgi-bin/carddisp.pl?gene=MYCBP2</a>     |
| ARHGAP2<br>4 | Rho GTPase<br>Activating<br>Protein 24                                                                 | Protein<br>Coding | 40 | GC04P0854<br>75 | 4.464039 | <a href="https://www.genecards.org/cgi-bin/carddisp.pl?gene=ARHGAP24">https://www.genecards.org/cgi-bin/carddisp.pl?gene=ARHGAP24</a> |
| MED17        | Mediator<br>Complex<br>Subunit 17                                                                      | Protein<br>Coding | 41 | GC11P0937<br>84 | 4.463892 | <a href="https://www.genecards.org/cgi-bin/carddisp.pl?gene=MED17">https://www.genecards.org/cgi-bin/carddisp.pl?gene=MED17</a>       |

|        |                                                  |                |    |             |          |                                                                                                                                   |
|--------|--------------------------------------------------|----------------|----|-------------|----------|-----------------------------------------------------------------------------------------------------------------------------------|
| CISD1  | CDGSH Iron Sulfur Domain 1                       | Protein Coding | 39 | GC10P058269 | 4.463004 | <a href="https://www.genecards.org/cgi-bin/carddisp.pl?gene=CISD1">https://www.genecards.org/cgi-bin/carddisp.pl?gene=CISD1</a>   |
| SMURF1 | SMAD Specific E3 Ubiquitin Protein Ligase 1      | Protein Coding | 45 | GC07M099027 | 4.457187 | <a href="https://www.genecards.org/cgi-bin/carddisp.pl?gene=SMURF1">https://www.genecards.org/cgi-bin/carddisp.pl?gene=SMURF1</a> |
| NUFIP1 | Nuclear FMR1 Interacting Protein 1               | Protein Coding | 35 | GC13M044939 | 4.456027 | <a href="https://www.genecards.org/cgi-bin/carddisp.pl?gene=NUFIP1">https://www.genecards.org/cgi-bin/carddisp.pl?gene=NUFIP1</a> |
| EDC4   | Enhancer Of MRNA Decapping 4                     | Protein Coding | 39 | GC16P067873 | 4.453725 | <a href="https://www.genecards.org/cgi-bin/carddisp.pl?gene=EDC4">https://www.genecards.org/cgi-bin/carddisp.pl?gene=EDC4</a>     |
| KIFC3  | Kinesin Family Member C3                         | Protein Coding | 39 | GC16M057758 | 4.44997  | <a href="https://www.genecards.org/cgi-bin/carddisp.pl?gene=KIFC3">https://www.genecards.org/cgi-bin/carddisp.pl?gene=KIFC3</a>   |
| ITSN1  | Intersectin 1                                    | Protein Coding | 42 | GC21P033642 | 4.44868  | <a href="https://www.genecards.org/cgi-bin/carddisp.pl?gene=ITSN1">https://www.genecards.org/cgi-bin/carddisp.pl?gene=ITSN1</a>   |
| POLR1H | RNA Polymerase I Subunit H                       | Protein Coding | 32 | GC06P057843 | 4.445566 | <a href="https://www.genecards.org/cgi-bin/carddisp.pl?gene=POLR1H">https://www.genecards.org/cgi-bin/carddisp.pl?gene=POLR1H</a> |
| CD74   | CD74 Molecule                                    | Protein Coding | 44 | GC05M150378 | 4.44493  | <a href="https://www.genecards.org/cgi-bin/carddisp.pl?gene=CD74">https://www.genecards.org/cgi-bin/carddisp.pl?gene=CD74</a>     |
| EGLN2  | Egl-9 Family Hypoxia Inducible Factor 2          | Protein Coding | 45 | GC19P041111 | 4.436359 | <a href="https://www.genecards.org/cgi-bin/carddisp.pl?gene=EGLN2">https://www.genecards.org/cgi-bin/carddisp.pl?gene=EGLN2</a>   |
| CCT6A  | Chaperonin Containing TCP1 Subunit 6A            | Protein Coding | 40 | GC07P056051 | 4.434839 | <a href="https://www.genecards.org/cgi-bin/carddisp.pl?gene=CCT6A">https://www.genecards.org/cgi-bin/carddisp.pl?gene=CCT6A</a>   |
| C5AR2  | Complement Component 5a Receptor 2               | Protein Coding | 40 | GC19P047333 | 4.431859 | <a href="https://www.genecards.org/cgi-bin/carddisp.pl?gene=C5AR2">https://www.genecards.org/cgi-bin/carddisp.pl?gene=C5AR2</a>   |
| SENP3  | SUMO Specific Peptidase 3                        | Protein Coding | 40 | GC17P009106 | 4.430599 | <a href="https://www.genecards.org/cgi-bin/carddisp.pl?gene=SENP3">https://www.genecards.org/cgi-bin/carddisp.pl?gene=SENP3</a>   |
| ABCF1  | ATP Binding Cassette Subfamily F Member 1        | Protein Coding | 40 | GC06P030571 | 4.429214 | <a href="https://www.genecards.org/cgi-bin/carddisp.pl?gene=ABCF1">https://www.genecards.org/cgi-bin/carddisp.pl?gene=ABCF1</a>   |
| RAB11B | RAB11B, Member RAS Oncogene Family               | Protein Coding | 43 | GC19P008393 | 4.428178 | <a href="https://www.genecards.org/cgi-bin/carddisp.pl?gene=RAB11B">https://www.genecards.org/cgi-bin/carddisp.pl?gene=RAB11B</a> |
| SEMA3E | Semaphorin 3E                                    | Protein Coding | 43 | GC07M083363 | 4.42813  | <a href="https://www.genecards.org/cgi-bin/carddisp.pl?gene=SEMA3E">https://www.genecards.org/cgi-bin/carddisp.pl?gene=SEMA3E</a> |
| HAPLN1 | Hyaluronan And Proteoglycan Link Protein 1       | Protein Coding | 43 | GC05M083637 | 4.427074 | <a href="https://www.genecards.org/cgi-bin/carddisp.pl?gene=HAPLN1">https://www.genecards.org/cgi-bin/carddisp.pl?gene=HAPLN1</a> |
| PGC    | Progastricsin                                    | Protein Coding | 43 | GC06M041736 | 4.424487 | <a href="https://www.genecards.org/cgi-bin/carddisp.pl?gene=PGC">https://www.genecards.org/cgi-bin/carddisp.pl?gene=PGC</a>       |
| CDT1   | Chromatin Licensing And DNA Replication Factor 1 | Protein Coding | 44 | GC16P088803 | 4.422527 | <a href="https://www.genecards.org/cgi-bin/carddisp.pl?gene=CDT1">https://www.genecards.org/cgi-bin/carddisp.pl?gene=CDT1</a>     |

|          |                                                        |                |    |             |          |                                                                                                                                       |
|----------|--------------------------------------------------------|----------------|----|-------------|----------|---------------------------------------------------------------------------------------------------------------------------------------|
| NEDD8    | NEDD8 Ubiquitin Like Modifier                          | Protein Coding | 41 | GC14M024216 | 4.41927  | <a href="https://www.genecards.org/cgi-bin/carddisp.pl?gene=NEDD8">https://www.genecards.org/cgi-bin/carddisp.pl?gene=NEDD8</a>       |
| NCOA4    | Nuclear Receptor Coactivator 4 Eukaryotic              | Protein Coding | 40 | GC10M046005 | 4.417659 | <a href="https://www.genecards.org/cgi-bin/carddisp.pl?gene=NCOA4">https://www.genecards.org/cgi-bin/carddisp.pl?gene=NCOA4</a>       |
| EIF4A3   | Translation Initiation Factor 4A3                      | Protein Coding | 44 | GC17M080135 | 4.417566 | <a href="https://www.genecards.org/cgi-bin/carddisp.pl?gene=EIF4A3">https://www.genecards.org/cgi-bin/carddisp.pl?gene=EIF4A3</a>     |
| MAN2C1   | Mannosidase Alpha Class 2C Member 1                    | Protein Coding | 38 | GC15M075355 | 4.417305 | <a href="https://www.genecards.org/cgi-bin/carddisp.pl?gene=MAN2C1">https://www.genecards.org/cgi-bin/carddisp.pl?gene=MAN2C1</a>     |
| ARRDC3   | Arrestin Domain Containing 3                           | Protein Coding | 38 | GC05M091368 | 4.414473 | <a href="https://www.genecards.org/cgi-bin/carddisp.pl?gene=ARRDC3">https://www.genecards.org/cgi-bin/carddisp.pl?gene=ARRDC3</a>     |
| EREG     | Epiregulin                                             | Protein Coding | 42 | GC04P074366 | 4.414438 | <a href="https://www.genecards.org/cgi-bin/carddisp.pl?gene=EREG">https://www.genecards.org/cgi-bin/carddisp.pl?gene=EREG</a>         |
| DDX60L   | DEXD/H-Box 60 Like                                     | Protein Coding | 33 | GC04M168356 | 4.411598 | <a href="https://www.genecards.org/cgi-bin/carddisp.pl?gene=DDX60L">https://www.genecards.org/cgi-bin/carddisp.pl?gene=DDX60L</a>     |
| CEPT1    | Choline/Ethanolamine Phosphotransferase 1              | Protein Coding | 40 | GC01P111139 | 4.408087 | <a href="https://www.genecards.org/cgi-bin/carddisp.pl?gene=CEPT1">https://www.genecards.org/cgi-bin/carddisp.pl?gene=CEPT1</a>       |
| SMPD4    | Sphingomyelin Phosphodiesterase 4                      | Protein Coding | 38 | GC02M130151 | 4.40805  | <a href="https://www.genecards.org/cgi-bin/carddisp.pl?gene=SMPD4">https://www.genecards.org/cgi-bin/carddisp.pl?gene=SMPD4</a>       |
| INO80    | INO80 Complex ATPase Subunit                           | Protein Coding | 37 | GC15M040979 | 4.404651 | <a href="https://www.genecards.org/cgi-bin/carddisp.pl?gene=INO80">https://www.genecards.org/cgi-bin/carddisp.pl?gene=INO80</a>       |
| SERPINB6 | Serpin Family B Member 6                               | Protein Coding | 44 | GC06M002948 | 4.401329 | <a href="https://www.genecards.org/cgi-bin/carddisp.pl?gene=SERPINB6">https://www.genecards.org/cgi-bin/carddisp.pl?gene=SERPINB6</a> |
| G0S2     | G0/G1 Switch 2                                         | Protein Coding | 33 | GC01P209675 | 4.398935 | <a href="https://www.genecards.org/cgi-bin/carddisp.pl?gene=G0S2">https://www.genecards.org/cgi-bin/carddisp.pl?gene=G0S2</a>         |
| FOXK1    | Forkhead Box K1                                        | Protein Coding | 35 | GC07P004682 | 4.395694 | <a href="https://www.genecards.org/cgi-bin/carddisp.pl?gene=FOXK1">https://www.genecards.org/cgi-bin/carddisp.pl?gene=FOXK1</a>       |
| MTARC1   | Mitochondrial Amidoxime Reducing Component 1           | Protein Coding | 28 | GC01P220788 | 4.391452 | <a href="https://www.genecards.org/cgi-bin/carddisp.pl?gene=MTARC1">https://www.genecards.org/cgi-bin/carddisp.pl?gene=MTARC1</a>     |
| CILP2    | Cartilage Intermediate Layer Protein 2                 | Protein Coding | 37 | GC19P019538 | 4.386812 | <a href="https://www.genecards.org/cgi-bin/carddisp.pl?gene=CILP2">https://www.genecards.org/cgi-bin/carddisp.pl?gene=CILP2</a>       |
| PPP1R14A | Protein Phosphatase 1 Regulatory Inhibitor Subunit 14A | Protein Coding | 41 | GC19M038251 | 4.384929 | <a href="https://www.genecards.org/cgi-bin/carddisp.pl?gene=PPP1R14A">https://www.genecards.org/cgi-bin/carddisp.pl?gene=PPP1R14A</a> |
| NOVA1    | NOVA Alternative Splicing Regulator 1                  | Protein Coding | 40 | GC14M026443 | 4.384608 | <a href="https://www.genecards.org/cgi-bin/carddisp.pl?gene=NOVA1">https://www.genecards.org/cgi-bin/carddisp.pl?gene=NOVA1</a>       |
| EFHD1    | EF-Hand Domain Family Member D1                        | Protein Coding | 36 | GC02P232606 | 4.383911 | <a href="https://www.genecards.org/cgi-bin/carddisp.pl?gene=EFHD1">https://www.genecards.org/cgi-bin/carddisp.pl?gene=EFHD1</a>       |
| MIR124-3 | MicroRNA 124-3                                         | RNA Gene       | 18 | GC20P063180 | 4.382467 | <a href="https://www.genecards.org/cgi-bin/carddisp.pl?gene=MIR124-3">https://www.genecards.org/cgi-bin/carddisp.pl?gene=MIR124-3</a> |

|          |                                                         |                |    |             |          |                                                                                                                                       |
|----------|---------------------------------------------------------|----------------|----|-------------|----------|---------------------------------------------------------------------------------------------------------------------------------------|
| EIF3A    | Eukaryotic Translation Initiation Factor 3 Subunit A    | Protein Coding | 43 | GC10M119034 | 4.37745  | <a href="https://www.genecards.org/cgi-bin/carddisp.pl?gene=EIF3A">https://www.genecards.org/cgi-bin/carddisp.pl?gene=EIF3A</a>       |
| ROR1     | Receptor Tyrosine Kinase Like Orphan Receptor 1         | Protein Coding | 48 | GC01P063774 | 4.374794 | <a href="https://www.genecards.org/cgi-bin/carddisp.pl?gene=ROR1">https://www.genecards.org/cgi-bin/carddisp.pl?gene=ROR1</a>         |
| SCARF2   | Scavenger Receptor Class F Member 2                     | Protein Coding | 41 | GC22M020424 | 4.37427  | <a href="https://www.genecards.org/cgi-bin/carddisp.pl?gene=SCARF2">https://www.genecards.org/cgi-bin/carddisp.pl?gene=SCARF2</a>     |
| PPAT     | Phosphoribosyl Pyrophosphate Amidotransferase           | Protein Coding | 44 | GC04M056393 | 4.370205 | <a href="https://www.genecards.org/cgi-bin/carddisp.pl?gene=PPAT">https://www.genecards.org/cgi-bin/carddisp.pl?gene=PPAT</a>         |
| MIR199A2 | MicroRNA 199a-2                                         | RNA Gene       | 19 | GC01M172235 | 4.361644 | <a href="https://www.genecards.org/cgi-bin/carddisp.pl?gene=MIR199A2">https://www.genecards.org/cgi-bin/carddisp.pl?gene=MIR199A2</a> |
| POU3F1   | POU Class 3 Homeobox 1                                  | Protein Coding | 37 | GC01M038044 | 4.356398 | <a href="https://www.genecards.org/cgi-bin/carddisp.pl?gene=POU3F1">https://www.genecards.org/cgi-bin/carddisp.pl?gene=POU3F1</a>     |
| TP53BP2  | Tumor Protein P53 Binding Protein 2                     | Protein Coding | 43 | GC01M223779 | 4.355329 | <a href="https://www.genecards.org/cgi-bin/carddisp.pl?gene=TP53BP2">https://www.genecards.org/cgi-bin/carddisp.pl?gene=TP53BP2</a>   |
| CCDC63   | Coiled-Coil Domain Containing 63                        | Protein Coding | 34 | GC12P110846 | 4.354627 | <a href="https://www.genecards.org/cgi-bin/carddisp.pl?gene=CCDC63">https://www.genecards.org/cgi-bin/carddisp.pl?gene=CCDC63</a>     |
| ACBD4    | Acyl-CoA Binding Domain Containing 4                    | Protein Coding | 38 | GC17P045132 | 4.351822 | <a href="https://www.genecards.org/cgi-bin/carddisp.pl?gene=ACBD4">https://www.genecards.org/cgi-bin/carddisp.pl?gene=ACBD4</a>       |
| NDUFB5   | NADH:Ubiquinone Oxidoreductase Subunit B5               | Protein Coding | 37 | GC03P179604 | 4.350846 | <a href="https://www.genecards.org/cgi-bin/carddisp.pl?gene=NDUFB5">https://www.genecards.org/cgi-bin/carddisp.pl?gene=NDUFB5</a>     |
| TNFSF14  | TNF Superfamily Member 14                               | Protein Coding | 41 | GC19M006663 | 4.349636 | <a href="https://www.genecards.org/cgi-bin/carddisp.pl?gene=TNFSF14">https://www.genecards.org/cgi-bin/carddisp.pl?gene=TNFSF14</a>   |
| RBMS3    | RNA Binding Motif Single Stranded Interacting Protein 3 | Protein Coding | 36 | GC03P028575 | 4.341599 | <a href="https://www.genecards.org/cgi-bin/carddisp.pl?gene=RBMS3">https://www.genecards.org/cgi-bin/carddisp.pl?gene=RBMS3</a>       |
| SRSF7    | Serine And Arginine Rich Splicing Factor 7              | Protein Coding | 40 | GC02M038743 | 4.3395   | <a href="https://www.genecards.org/cgi-bin/carddisp.pl?gene=SRSF7">https://www.genecards.org/cgi-bin/carddisp.pl?gene=SRSF7</a>       |
| IGLON5   | IgLON Family Member 5                                   | Protein Coding | 33 | GC19P051311 | 4.339272 | <a href="https://www.genecards.org/cgi-bin/carddisp.pl?gene=IGLON5">https://www.genecards.org/cgi-bin/carddisp.pl?gene=IGLON5</a>     |
| MIR31HG  | MIR31 Host Gene                                         | RNA Gene       | 19 | GC09M021439 | 4.33896  | <a href="https://www.genecards.org/cgi-bin/carddisp.pl?gene=MIR31HG">https://www.genecards.org/cgi-bin/carddisp.pl?gene=MIR31HG</a>   |
| PKNOX1   | PBX/Knotted 1 Homeobox 1                                | Protein Coding | 41 | GC21P042974 | 4.336639 | <a href="https://www.genecards.org/cgi-bin/carddisp.pl?gene=PKNOX1">https://www.genecards.org/cgi-bin/carddisp.pl?gene=PKNOX1</a>     |
| MC3R     | Melanocortin 3 Receptor                                 | Protein Coding | 44 | GC20P056248 | 4.334254 | <a href="https://www.genecards.org/cgi-bin/carddisp.pl?gene=MC3R">https://www.genecards.org/cgi-bin/carddisp.pl?gene=MC3R</a>         |



|         |                                                       |                |    |             |          |                                                                                                                                     |
|---------|-------------------------------------------------------|----------------|----|-------------|----------|-------------------------------------------------------------------------------------------------------------------------------------|
| GNG12   | G Protein Subunit Gamma 12                            | Protein Coding | 42 | GC01M067701 | 4.333367 | <a href="https://www.genecards.org/cgi-bin/carddisp.pl?gene=GNG12">https://www.genecards.org/cgi-bin/carddisp.pl?gene=GNG12</a>     |
| KIF14   | Kinesin Family Member 14                              | Protein Coding | 40 | GC01M200551 | 4.330287 | <a href="https://www.genecards.org/cgi-bin/carddisp.pl?gene=KIF14">https://www.genecards.org/cgi-bin/carddisp.pl?gene=KIF14</a>     |
| PATJ    | PATJ Crumbs Cell Polarity Complex Component           | Protein Coding | 32 | GC01P061743 | 4.320234 | <a href="https://www.genecards.org/cgi-bin/carddisp.pl?gene=PATJ">https://www.genecards.org/cgi-bin/carddisp.pl?gene=PATJ</a>       |
| PIP5K1B | Phosphatidylinositol-4-Phosphate 5-Kinase Type 1 Beta | Protein Coding | 44 | GC09P068705 | 4.318393 | <a href="https://www.genecards.org/cgi-bin/carddisp.pl?gene=PIP5K1B">https://www.genecards.org/cgi-bin/carddisp.pl?gene=PIP5K1B</a> |
| POLR2E  | RNA Polymerase II, I And III Subunit E                | Protein Coding | 44 | GC19M001086 | 4.318276 | <a href="https://www.genecards.org/cgi-bin/carddisp.pl?gene=POLR2E">https://www.genecards.org/cgi-bin/carddisp.pl?gene=POLR2E</a>   |
| BAG2    | BAG Cochaperone 2                                     | Protein Coding | 41 | GC06P057172 | 4.317065 | <a href="https://www.genecards.org/cgi-bin/carddisp.pl?gene=BAG2">https://www.genecards.org/cgi-bin/carddisp.pl?gene=BAG2</a>       |
| UQCRH   | Ubiquinol-Cytochrome C Reductase Hinge Protein        | Protein Coding | 38 | GC01P046303 | 4.313158 | <a href="https://www.genecards.org/cgi-bin/carddisp.pl?gene=UQCRH">https://www.genecards.org/cgi-bin/carddisp.pl?gene=UQCRH</a>     |
| PYCR2   | Pyrroline-5-Carboxylate Reductase 2                   | Protein Coding | 45 | GC01M225919 | 4.312352 | <a href="https://www.genecards.org/cgi-bin/carddisp.pl?gene=PYCR2">https://www.genecards.org/cgi-bin/carddisp.pl?gene=PYCR2</a>     |
| PTPN13  | Protein Tyrosine Phosphatase Non-Receptor Type 13     | Protein Coding | 44 | GC04P086594 | 4.306979 | <a href="https://www.genecards.org/cgi-bin/carddisp.pl?gene=PTPN13">https://www.genecards.org/cgi-bin/carddisp.pl?gene=PTPN13</a>   |
| TUBA1C  | Tubulin Alpha 1c                                      | Protein Coding | 41 | GC12P049188 | 4.306669 | <a href="https://www.genecards.org/cgi-bin/carddisp.pl?gene=TUBA1C">https://www.genecards.org/cgi-bin/carddisp.pl?gene=TUBA1C</a>   |
| NEPRO   | Nucleolus And Neural Progenitor Protein               | Protein Coding | 31 | GC03M113009 | 4.305442 | <a href="https://www.genecards.org/cgi-bin/carddisp.pl?gene=NEPRO">https://www.genecards.org/cgi-bin/carddisp.pl?gene=NEPRO</a>     |
| NDUFB2  | NADH:Ubiquinone Oxidoreductase Subunit B2             | Protein Coding | 40 | GC07P140690 | 4.303535 | <a href="https://www.genecards.org/cgi-bin/carddisp.pl?gene=NDUFB2">https://www.genecards.org/cgi-bin/carddisp.pl?gene=NDUFB2</a>   |
| REEP3   | Receptor Accessory Protein 3                          | Protein Coding | 37 | GC10P063521 | 4.297606 | <a href="https://www.genecards.org/cgi-bin/carddisp.pl?gene=REEP3">https://www.genecards.org/cgi-bin/carddisp.pl?gene=REEP3</a>     |
| DKK3    | Dickkopf WNT Signaling Pathway Inhibitor 3            | Protein Coding | 41 | GC11M011962 | 4.296789 | <a href="https://www.genecards.org/cgi-bin/carddisp.pl?gene=DKK3">https://www.genecards.org/cgi-bin/carddisp.pl?gene=DKK3</a>       |
| RFK     | Riboflavin Kinase                                     | Protein Coding | 40 | GC09M076385 | 4.295729 | <a href="https://www.genecards.org/cgi-bin/carddisp.pl?gene=RFK">https://www.genecards.org/cgi-bin/carddisp.pl?gene=RFK</a>         |
| AP1G1   | Adaptor Related Protein Complex 1 Subunit Gamma 1     | Protein Coding | 41 | GC16M071729 | 4.295501 | <a href="https://www.genecards.org/cgi-bin/carddisp.pl?gene=AP1G1">https://www.genecards.org/cgi-bin/carddisp.pl?gene=AP1G1</a>     |

|         |                                                      |                |    |             |          |                                                                                                                                     |
|---------|------------------------------------------------------|----------------|----|-------------|----------|-------------------------------------------------------------------------------------------------------------------------------------|
| KLK10   | Kallikrein Related Peptidase 10                      | Protein Coding | 40 | GC19M051012 | 4.29087  | <a href="https://www.genecards.org/cgi-bin/carddisp.pl?gene=KLK10">https://www.genecards.org/cgi-bin/carddisp.pl?gene=KLK10</a>     |
| MIR873  | MicroRNA 873                                         | RNA Gene       | 16 | GC09M028880 | 4.289502 | <a href="https://www.genecards.org/cgi-bin/carddisp.pl?gene=MIR873">https://www.genecards.org/cgi-bin/carddisp.pl?gene=MIR873</a>   |
| MAP4    | Microtubule Associated Protein 4                     | Protein Coding | 42 | GC03M047850 | 4.288494 | <a href="https://www.genecards.org/cgi-bin/carddisp.pl?gene=MAP4">https://www.genecards.org/cgi-bin/carddisp.pl?gene=MAP4</a>       |
| UBAC1   | UBA Domain Containing 1                              | Protein Coding | 37 | GC09M135932 | 4.288327 | <a href="https://www.genecards.org/cgi-bin/carddisp.pl?gene=UBAC1">https://www.genecards.org/cgi-bin/carddisp.pl?gene=UBAC1</a>     |
| OSBPL5  | Oxysterol Binding Protein Like 5                     | Protein Coding | 40 | GC11M003088 | 4.28806  | <a href="https://www.genecards.org/cgi-bin/carddisp.pl?gene=OSBPL5">https://www.genecards.org/cgi-bin/carddisp.pl?gene=OSBPL5</a>   |
| NPY1R   | Neuropeptide Y Receptor Y1                           | Protein Coding | 47 | GC04M163323 | 4.286477 | <a href="https://www.genecards.org/cgi-bin/carddisp.pl?gene=NPY1R">https://www.genecards.org/cgi-bin/carddisp.pl?gene=NPY1R</a>     |
| CDC27   | Cell Division Cycle 27                               | Protein Coding | 42 | GC17M047117 | 4.285986 | <a href="https://www.genecards.org/cgi-bin/carddisp.pl?gene=CDC27">https://www.genecards.org/cgi-bin/carddisp.pl?gene=CDC27</a>     |
| GTPBP4  | GTP Binding Protein 4                                | Protein Coding | 39 | GC10P000988 | 4.285235 | <a href="https://www.genecards.org/cgi-bin/carddisp.pl?gene=GTPBP4">https://www.genecards.org/cgi-bin/carddisp.pl?gene=GTPBP4</a>   |
| APOL2   | Apolipoprotein L2                                    | Protein Coding | 40 | GC22M036226 | 4.280738 | <a href="https://www.genecards.org/cgi-bin/carddisp.pl?gene=APOL2">https://www.genecards.org/cgi-bin/carddisp.pl?gene=APOL2</a>     |
| GMPR    | Guanosine Monophosphate Reductase Programmed         | Protein Coding | 44 | GC06P016238 | 4.278691 | <a href="https://www.genecards.org/cgi-bin/carddisp.pl?gene=GMPR">https://www.genecards.org/cgi-bin/carddisp.pl?gene=GMPR</a>       |
| PDCD6IP | Cell Death 6 Interacting Protein                     | Protein Coding | 44 | GC03P033798 | 4.274946 | <a href="https://www.genecards.org/cgi-bin/carddisp.pl?gene=PDCD6IP">https://www.genecards.org/cgi-bin/carddisp.pl?gene=PDCD6IP</a> |
| PPME1   | Phosphatase Methylesterase 1                         | Protein Coding | 39 | GC11P074170 | 4.268126 | <a href="https://www.genecards.org/cgi-bin/carddisp.pl?gene=PPME1">https://www.genecards.org/cgi-bin/carddisp.pl?gene=PPME1</a>     |
| HSPA14  | Heat Shock Protein Family A (Hsp70) Member 14        | Protein Coding | 40 | GC10P014847 | 4.266142 | <a href="https://www.genecards.org/cgi-bin/carddisp.pl?gene=HSPA14">https://www.genecards.org/cgi-bin/carddisp.pl?gene=HSPA14</a>   |
| MCF2L2  | MCF.2 Cell Line Derived Transforming Sequence-Like 2 | Protein Coding | 34 | GC03M183183 | 4.262735 | <a href="https://www.genecards.org/cgi-bin/carddisp.pl?gene=MCF2L2">https://www.genecards.org/cgi-bin/carddisp.pl?gene=MCF2L2</a>   |
| CUL7    | Cullin 7                                             | Protein Coding | 43 | GC06M043037 | 4.261546 | <a href="https://www.genecards.org/cgi-bin/carddisp.pl?gene=CUL7">https://www.genecards.org/cgi-bin/carddisp.pl?gene=CUL7</a>       |
| SLC30A6 | Solute Carrier Family 30 Member 6                    | Protein Coding | 39 | GC02P032166 | 4.261125 | <a href="https://www.genecards.org/cgi-bin/carddisp.pl?gene=SLC30A6">https://www.genecards.org/cgi-bin/carddisp.pl?gene=SLC30A6</a> |
| AP2A1   | Adaptor Related Protein Complex 2 Subunit Alpha 1    | Protein Coding | 40 | GC19P049766 | 4.259474 | <a href="https://www.genecards.org/cgi-bin/carddisp.pl?gene=AP2A1">https://www.genecards.org/cgi-bin/carddisp.pl?gene=AP2A1</a>     |
| MTCH2   | Mitochondrial Carrier 2                              | Protein Coding | 41 | GC11M047604 | 4.258552 | <a href="https://www.genecards.org/cgi-bin/carddisp.pl?gene=MTCH2">https://www.genecards.org/cgi-bin/carddisp.pl?gene=MTCH2</a>     |

|         |                                                                                                              |                   |    |                 |          |                                                                                                                                     |
|---------|--------------------------------------------------------------------------------------------------------------|-------------------|----|-----------------|----------|-------------------------------------------------------------------------------------------------------------------------------------|
| NPLOC4  | NPL4<br>Homolog,<br>Ubiquitin<br>Recognition<br>Factor<br>Inosine<br>Monophosphat<br>e<br>Dehydrogenase<br>2 | Protein<br>Coding | 40 | GC17M081<br>556 | 4.258315 | <a href="https://www.genecards.org/cgi-bin/carddisp.pl?gene=NPLOC4">https://www.genecards.org/cgi-bin/carddisp.pl?gene=NPLOC4</a>   |
| IMPDH2  |                                                                                                              | Protein<br>Coding | 47 | GC03M049<br>439 | 4.256704 | <a href="https://www.genecards.org/cgi-bin/carddisp.pl?gene=IMPDH2">https://www.genecards.org/cgi-bin/carddisp.pl?gene=IMPDH2</a>   |
| RANBP1  | RAN Binding<br>Protein 1                                                                                     | Protein<br>Coding | 44 | GC22P0201<br>15 | 4.254214 | <a href="https://www.genecards.org/cgi-bin/carddisp.pl?gene=RANBP1">https://www.genecards.org/cgi-bin/carddisp.pl?gene=RANBP1</a>   |
| RPL34   | Ribosomal<br>Protein L34                                                                                     | Protein<br>Coding | 40 | GC04P1086<br>20 | 4.252873 | <a href="https://www.genecards.org/cgi-bin/carddisp.pl?gene=RPL34">https://www.genecards.org/cgi-bin/carddisp.pl?gene=RPL34</a>     |
| H2AZ1   | H2A.Z Variant<br>Histone 1                                                                                   | Protein<br>Coding | 34 | GC04M099<br>949 | 4.25223  | <a href="https://www.genecards.org/cgi-bin/carddisp.pl?gene=H2AZ1">https://www.genecards.org/cgi-bin/carddisp.pl?gene=H2AZ1</a>     |
| RBM14   | RNA Binding<br>Motif Protein<br>14                                                                           | Protein<br>Coding | 37 | GC11P0667<br>85 | 4.250051 | <a href="https://www.genecards.org/cgi-bin/carddisp.pl?gene=RBM14">https://www.genecards.org/cgi-bin/carddisp.pl?gene=RBM14</a>     |
| PCDH7   | Protocadherin<br>7                                                                                           | Protein<br>Coding | 40 | GC04P0307<br>22 | 4.24526  | <a href="https://www.genecards.org/cgi-bin/carddisp.pl?gene=PCDH7">https://www.genecards.org/cgi-bin/carddisp.pl?gene=PCDH7</a>     |
| MTA2    | Metastasis<br>Associated 1<br>Family Member<br>2                                                             | Protein<br>Coding | 40 | GC11M069<br>248 | 4.24508  | <a href="https://www.genecards.org/cgi-bin/carddisp.pl?gene=MTA2">https://www.genecards.org/cgi-bin/carddisp.pl?gene=MTA2</a>       |
| H2BS1   | H2B.S Histone<br>1                                                                                           | Protein<br>Coding | 23 | GC21P0435<br>67 | 4.242882 | <a href="https://www.genecards.org/cgi-bin/carddisp.pl?gene=H2BS1">https://www.genecards.org/cgi-bin/carddisp.pl?gene=H2BS1</a>     |
| NTM     | Neurotrimin                                                                                                  | Protein<br>Coding | 41 | GC11P1313<br>70 | 4.242783 | <a href="https://www.genecards.org/cgi-bin/carddisp.pl?gene=NTM">https://www.genecards.org/cgi-bin/carddisp.pl?gene=NTM</a>         |
| ARHGEF1 | Rho Guanine<br>Nucleotide<br>Exchange<br>Factor 1                                                            | Protein<br>Coding | 47 | GC19P0418<br>83 | 4.241294 | <a href="https://www.genecards.org/cgi-bin/carddisp.pl?gene=ARHGEF1">https://www.genecards.org/cgi-bin/carddisp.pl?gene=ARHGEF1</a> |
| OSBPL11 | Oxysterol<br>Binding Protein<br>Like 11                                                                      | Protein<br>Coding | 36 | GC03M125<br>529 | 4.23335  | <a href="https://www.genecards.org/cgi-bin/carddisp.pl?gene=OSBPL11">https://www.genecards.org/cgi-bin/carddisp.pl?gene=OSBPL11</a> |
| SLC6A11 | Solute Carrier<br>Family 6<br>Member 11                                                                      | Protein<br>Coding | 43 | GC03P0110<br>27 | 4.232661 | <a href="https://www.genecards.org/cgi-bin/carddisp.pl?gene=SLC6A11">https://www.genecards.org/cgi-bin/carddisp.pl?gene=SLC6A11</a> |
| FBXO42  | F-Box Protein<br>42                                                                                          | Protein<br>Coding | 34 | GC01M016<br>292 | 4.231699 | <a href="https://www.genecards.org/cgi-bin/carddisp.pl?gene=FBXO42">https://www.genecards.org/cgi-bin/carddisp.pl?gene=FBXO42</a>   |
| DAGLB   | Diacylglycerol<br>Lipase Beta<br>Protein                                                                     | Protein<br>Coding | 40 | GC07M006<br>416 | 4.229289 | <a href="https://www.genecards.org/cgi-bin/carddisp.pl?gene=DAGLB">https://www.genecards.org/cgi-bin/carddisp.pl?gene=DAGLB</a>     |
| PIAS3   | Inhibitor Of<br>Activated STAT<br>3                                                                          | Protein<br>Coding | 41 | GC01M145<br>848 | 4.226283 | <a href="https://www.genecards.org/cgi-bin/carddisp.pl?gene=PIAS3">https://www.genecards.org/cgi-bin/carddisp.pl?gene=PIAS3</a>     |
| UBE2I   | Ubiquitin<br>Conjugating<br>Enzyme E2 I<br>Short                                                             | Protein<br>Coding | 48 | GC16P0055<br>23 | 4.225298 | <a href="https://www.genecards.org/cgi-bin/carddisp.pl?gene=UBE2I">https://www.genecards.org/cgi-bin/carddisp.pl?gene=UBE2I</a>     |
| STMP1   | Transmembran<br>e<br>Mitochondrial<br>Protein 1                                                              | Protein<br>Coding | 22 | GC07P1356<br>71 | 4.223236 | <a href="https://www.genecards.org/cgi-bin/carddisp.pl?gene=STMP1">https://www.genecards.org/cgi-bin/carddisp.pl?gene=STMP1</a>     |
| CLEC4E  | C-Type Lectin<br>Domain Family<br>4 Member E                                                                 | Protein<br>Coding | 37 | GC12M008<br>535 | 4.219957 | <a href="https://www.genecards.org/cgi-bin/carddisp.pl?gene=CLEC4E">https://www.genecards.org/cgi-bin/carddisp.pl?gene=CLEC4E</a>   |

|         |                                                         |                |    |             |          |                                                                                                                                     |
|---------|---------------------------------------------------------|----------------|----|-------------|----------|-------------------------------------------------------------------------------------------------------------------------------------|
| ACTR3   | Actin Related Protein 3                                 | Protein Coding | 43 | GC02P113889 | 4.219325 | <a href="https://www.genecards.org/cgi-bin/carddisp.pl?gene=ACTR3">https://www.genecards.org/cgi-bin/carddisp.pl?gene=ACTR3</a>     |
| TRIM39  | Tripartite Motif Containing 39                          | Protein Coding | 38 | GC06P055171 | 4.217925 | <a href="https://www.genecards.org/cgi-bin/carddisp.pl?gene=TRIM39">https://www.genecards.org/cgi-bin/carddisp.pl?gene=TRIM39</a>   |
| STIM2   | Stromal Interaction Molecule 2                          | Protein Coding | 40 | GC04P026859 | 4.214132 | <a href="https://www.genecards.org/cgi-bin/carddisp.pl?gene=STIM2">https://www.genecards.org/cgi-bin/carddisp.pl?gene=STIM2</a>     |
| BRD1    | Bromodomain Containing 1                                | Protein Coding | 41 | GC22M049773 | 4.214014 | <a href="https://www.genecards.org/cgi-bin/carddisp.pl?gene=BRD1">https://www.genecards.org/cgi-bin/carddisp.pl?gene=BRD1</a>       |
| SLC38A2 | Solute Carrier Family 38 Member 2                       | Protein Coding | 43 | GC12M046358 | 4.211423 | <a href="https://www.genecards.org/cgi-bin/carddisp.pl?gene=SLC38A2">https://www.genecards.org/cgi-bin/carddisp.pl?gene=SLC38A2</a> |
| MAP3K2  | Mitogen-Activated Protein Kinase Kinase 2               | Protein Coding | 45 | GC02M127298 | 4.208899 | <a href="https://www.genecards.org/cgi-bin/carddisp.pl?gene=MAP3K2">https://www.genecards.org/cgi-bin/carddisp.pl?gene=MAP3K2</a>   |
| DNAJC14 | DnaJ Heat Shock Protein Family (Hsp40) Member C14       | Protein Coding | 34 | GC12M055820 | 4.208716 | <a href="https://www.genecards.org/cgi-bin/carddisp.pl?gene=DNAJC14">https://www.genecards.org/cgi-bin/carddisp.pl?gene=DNAJC14</a> |
| PSMD13  | Proteasome 26S Subunit, Non-ATPase 13                   | Protein Coding | 41 | GC11P000236 | 4.207955 | <a href="https://www.genecards.org/cgi-bin/carddisp.pl?gene=PSMD13">https://www.genecards.org/cgi-bin/carddisp.pl?gene=PSMD13</a>   |
| DFFA    | DNA Fragmentation Factor Subunit Alpha Protein          | Protein Coding | 45 | GC01M010456 | 4.207635 | <a href="https://www.genecards.org/cgi-bin/carddisp.pl?gene=DFFA">https://www.genecards.org/cgi-bin/carddisp.pl?gene=DFFA</a>       |
| PTPRE   | Tyrosine Phosphatase Receptor Type E                    | Protein Coding | 41 | GC10P127907 | 4.204255 | <a href="https://www.genecards.org/cgi-bin/carddisp.pl?gene=PTPRE">https://www.genecards.org/cgi-bin/carddisp.pl?gene=PTPRE</a>     |
| GJB5    | Gap Junction Protein Beta 5                             | Protein Coding | 41 | GC01P034755 | 4.201731 | <a href="https://www.genecards.org/cgi-bin/carddisp.pl?gene=GJB5">https://www.genecards.org/cgi-bin/carddisp.pl?gene=GJB5</a>       |
| MYLIP   | Myosin Regulatory Light Chain Interacting Protein       | Protein Coding | 40 | GC06P016129 | 4.198773 | <a href="https://www.genecards.org/cgi-bin/carddisp.pl?gene=MYLIP">https://www.genecards.org/cgi-bin/carddisp.pl?gene=MYLIP</a>     |
| ELP3    | Elongator Acetyltransferase Complex Subunit 3           | Protein Coding | 40 | GC08P028089 | 4.196687 | <a href="https://www.genecards.org/cgi-bin/carddisp.pl?gene=ELP3">https://www.genecards.org/cgi-bin/carddisp.pl?gene=ELP3</a>       |
| SIK2    | Salt Inducible Kinase 2                                 | Protein Coding | 44 | GC11P111633 | 4.194995 | <a href="https://www.genecards.org/cgi-bin/carddisp.pl?gene=SIK2">https://www.genecards.org/cgi-bin/carddisp.pl?gene=SIK2</a>       |
| PIGW    | Phosphatidylinositol Glycan Anchor Biosynthesis Class W | Protein Coding | 38 | GC17P036534 | 4.19407  | <a href="https://www.genecards.org/cgi-bin/carddisp.pl?gene=PIGW">https://www.genecards.org/cgi-bin/carddisp.pl?gene=PIGW</a>       |
| KCNK18  | Potassium Two Pore Domain Channel Subfamily K Member 18 | Protein Coding | 38 | GC10P117197 | 4.19254  | <a href="https://www.genecards.org/cgi-bin/carddisp.pl?gene=KCNK18">https://www.genecards.org/cgi-bin/carddisp.pl?gene=KCNK18</a>   |

|         |                                                   |                |    |             |          |                                                                                                                                     |
|---------|---------------------------------------------------|----------------|----|-------------|----------|-------------------------------------------------------------------------------------------------------------------------------------|
| PRMT1   | Protein Arginine Methyltransferase 1              | Protein Coding | 48 | GC19P049675 | 4.192341 | <a href="https://www.genecards.org/cgi-bin/carddisp.pl?gene=PRMT1">https://www.genecards.org/cgi-bin/carddisp.pl?gene=PRMT1</a>     |
| VNN1    | Vanin 1                                           | Protein Coding | 44 | GC06M132680 | 4.187796 | <a href="https://www.genecards.org/cgi-bin/carddisp.pl?gene=VNN1">https://www.genecards.org/cgi-bin/carddisp.pl?gene=VNN1</a>       |
| CRYGS   | Crystallin Gamma S                                | Protein Coding | 41 | GC03M186538 | 4.184273 | <a href="https://www.genecards.org/cgi-bin/carddisp.pl?gene=CRYGS">https://www.genecards.org/cgi-bin/carddisp.pl?gene=CRYGS</a>     |
| NCOA6   | Nuclear Receptor Coactivator 6                    | Protein Coding | 39 | GC20M034700 | 4.180696 | <a href="https://www.genecards.org/cgi-bin/carddisp.pl?gene=NCOA6">https://www.genecards.org/cgi-bin/carddisp.pl?gene=NCOA6</a>     |
| ANKRD2  | Ankyrin Repeat Domain 2                           | Protein Coding | 37 | GC10P097572 | 4.176078 | <a href="https://www.genecards.org/cgi-bin/carddisp.pl?gene=ANKRD2">https://www.genecards.org/cgi-bin/carddisp.pl?gene=ANKRD2</a>   |
| KNL1    | Kinetochore Scaffold 1                            | Protein Coding | 34 | GC15P040595 | 4.168321 | <a href="https://www.genecards.org/cgi-bin/carddisp.pl?gene=KNL1">https://www.genecards.org/cgi-bin/carddisp.pl?gene=KNL1</a>       |
| STARD3  | StAR Related Lipid Transfer Domain Containing 3   | Protein Coding | 40 | GC17P039637 | 4.16773  | <a href="https://www.genecards.org/cgi-bin/carddisp.pl?gene=STARD3">https://www.genecards.org/cgi-bin/carddisp.pl?gene=STARD3</a>   |
| SNX1    | Sorting Nexin 1                                   | Protein Coding | 42 | GC15P064094 | 4.166001 | <a href="https://www.genecards.org/cgi-bin/carddisp.pl?gene=SNX1">https://www.genecards.org/cgi-bin/carddisp.pl?gene=SNX1</a>       |
| FER     | FER Tyrosine Kinase                               | Protein Coding | 47 | GC05P108747 | 4.163055 | <a href="https://www.genecards.org/cgi-bin/carddisp.pl?gene=FER">https://www.genecards.org/cgi-bin/carddisp.pl?gene=FER</a>         |
| PMAIP1  | Phorbol-12-Myristate-13-Acetate-Induced Protein 1 | Protein Coding | 40 | GC18P059899 | 4.163055 | <a href="https://www.genecards.org/cgi-bin/carddisp.pl?gene=PMAIP1">https://www.genecards.org/cgi-bin/carddisp.pl?gene=PMAIP1</a>   |
| SLC1A5  | Solute Carrier Family 1 Member 5                  | Protein Coding | 44 | GC19M047159 | 4.158493 | <a href="https://www.genecards.org/cgi-bin/carddisp.pl?gene=SLC1A5">https://www.genecards.org/cgi-bin/carddisp.pl?gene=SLC1A5</a>   |
| FKBP4   | FKBP Prolyl Isomerase 4                           | Protein Coding | 45 | GC12P002795 | 4.157864 | <a href="https://www.genecards.org/cgi-bin/carddisp.pl?gene=FKBP4">https://www.genecards.org/cgi-bin/carddisp.pl?gene=FKBP4</a>     |
| PDLIM5  | PDZ And LIM Domain 5                              | Protein Coding | 40 | GC04P094451 | 4.154386 | <a href="https://www.genecards.org/cgi-bin/carddisp.pl?gene=PDLIM5">https://www.genecards.org/cgi-bin/carddisp.pl?gene=PDLIM5</a>   |
| GIMAP5  | GTPase, IMAP Family Member 5                      | Protein Coding | 37 | GC07P150722 | 4.152097 | <a href="https://www.genecards.org/cgi-bin/carddisp.pl?gene=GIMAP5">https://www.genecards.org/cgi-bin/carddisp.pl?gene=GIMAP5</a>   |
| NDUFV3  | NADH:Ubiquinone Oxidoreductase Subunit V3         | Protein Coding | 41 | GC21P042879 | 4.151853 | <a href="https://www.genecards.org/cgi-bin/carddisp.pl?gene=NDUFV3">https://www.genecards.org/cgi-bin/carddisp.pl?gene=NDUFV3</a>   |
| CCT8    | Chaperonin Containing TCP1 Subunit 8              | Protein Coding | 40 | GC21M029055 | 4.139132 | <a href="https://www.genecards.org/cgi-bin/carddisp.pl?gene=CCT8">https://www.genecards.org/cgi-bin/carddisp.pl?gene=CCT8</a>       |
| MOB3B   | MOB Kinase Activator 3B                           | Protein Coding | 36 | GC09M027582 | 4.137991 | <a href="https://www.genecards.org/cgi-bin/carddisp.pl?gene=MOB3B">https://www.genecards.org/cgi-bin/carddisp.pl?gene=MOB3B</a>     |
| PTGIR   | Prostaglandin I2 Receptor                         | Protein Coding | 48 | GC19M047072 | 4.137783 | <a href="https://www.genecards.org/cgi-bin/carddisp.pl?gene=PTGIR">https://www.genecards.org/cgi-bin/carddisp.pl?gene=PTGIR</a>     |
| B3GALT4 | Beta-1,3-Galactosyltransferase 4                  | Protein Coding | 41 | GC06P033277 | 4.134985 | <a href="https://www.genecards.org/cgi-bin/carddisp.pl?gene=B3GALT4">https://www.genecards.org/cgi-bin/carddisp.pl?gene=B3GALT4</a> |
| COX7C   | Cytochrome C Oxidase Subunit 7C                   | Protein Coding | 38 | GC05P086617 | 4.133422 | <a href="https://www.genecards.org/cgi-bin/carddisp.pl?gene=COX7C">https://www.genecards.org/cgi-bin/carddisp.pl?gene=COX7C</a>     |
| SIRT7   | Sirtuin 7                                         | Protein Coding | 42 | GC17M081911 | 4.130557 | <a href="https://www.genecards.org/cgi-bin/carddisp.pl?gene=SIRT7">https://www.genecards.org/cgi-bin/carddisp.pl?gene=SIRT7</a>     |

|         |                                                                  |                |    |             |          |                                                                                                                                     |
|---------|------------------------------------------------------------------|----------------|----|-------------|----------|-------------------------------------------------------------------------------------------------------------------------------------|
| TMC4    | Transmembrane Channel Like 4                                     | Protein Coding | 35 | GC19M054160 | 4.127429 | <a href="https://www.genecards.org/cgi-bin/carddisp.pl?gene=TMC4">https://www.genecards.org/cgi-bin/carddisp.pl?gene=TMC4</a>       |
| ALDH8A1 | Aldehyde Dehydrogenase 8 Family Member A1                        | Protein Coding | 38 | GC06M134917 | 4.126362 | <a href="https://www.genecards.org/cgi-bin/carddisp.pl?gene=ALDH8A1">https://www.genecards.org/cgi-bin/carddisp.pl?gene=ALDH8A1</a> |
| PTGES2  | Prostaglandin E Synthase 2                                       | Protein Coding | 44 | GC09M128120 | 4.12583  | <a href="https://www.genecards.org/cgi-bin/carddisp.pl?gene=PTGES2">https://www.genecards.org/cgi-bin/carddisp.pl?gene=PTGES2</a>   |
| CRACR2A | Calcium Release Activated Channel Regulator 2A                   | Protein Coding | 31 | GC12M004349 | 4.123631 | <a href="https://www.genecards.org/cgi-bin/carddisp.pl?gene=CRACR2A">https://www.genecards.org/cgi-bin/carddisp.pl?gene=CRACR2A</a> |
| SART1   | Spliceosome Associated Factor 1, Recruiter Of U4/U6.U5 Tri-SnRNP | Protein Coding | 41 | GC11P066273 | 4.122902 | <a href="https://www.genecards.org/cgi-bin/carddisp.pl?gene=SART1">https://www.genecards.org/cgi-bin/carddisp.pl?gene=SART1</a>     |
| FGR     | FGR Proto-Oncogene, Src Family Tyrosine Kinase                   | Protein Coding | 48 | GC01M027622 | 4.119474 | <a href="https://www.genecards.org/cgi-bin/carddisp.pl?gene=FGR">https://www.genecards.org/cgi-bin/carddisp.pl?gene=FGR</a>         |
| C2orf16 | Chromosome 2 Open Reading Frame 16                               | Protein Coding | 27 | GC02P027611 | 4.117465 | <a href="https://www.genecards.org/cgi-bin/carddisp.pl?gene=C2orf16">https://www.genecards.org/cgi-bin/carddisp.pl?gene=C2orf16</a> |
| GYPE    | Glycophorin E (MNS Blood Group) Acid                             | Protein Coding | 31 | GC04M143870 | 4.11249  | <a href="https://www.genecards.org/cgi-bin/carddisp.pl?gene=GYPE">https://www.genecards.org/cgi-bin/carddisp.pl?gene=GYPE</a>       |
| ACP6    | Phosphatase 6, Lysophosphatidic                                  | Protein Coding | 40 | GC01M147630 | 4.110131 | <a href="https://www.genecards.org/cgi-bin/carddisp.pl?gene=ACP6">https://www.genecards.org/cgi-bin/carddisp.pl?gene=ACP6</a>       |
| NDUFC1  | NADH:Ubiquinone Oxidoreductase Subunit C1                        | Protein Coding | 36 | GC04M139267 | 4.109852 | <a href="https://www.genecards.org/cgi-bin/carddisp.pl?gene=NDUFC1">https://www.genecards.org/cgi-bin/carddisp.pl?gene=NDUFC1</a>   |
| PSME2   | Proteasome Activator Subunit 2                                   | Protein Coding | 43 | GC14M024143 | 4.100591 | <a href="https://www.genecards.org/cgi-bin/carddisp.pl?gene=PSME2">https://www.genecards.org/cgi-bin/carddisp.pl?gene=PSME2</a>     |
| PDXDC1  | Pyridoxal Dependent Decarboxylase Domain Containing 1            | Protein Coding | 38 | GC16P014974 | 4.095699 | <a href="https://www.genecards.org/cgi-bin/carddisp.pl?gene=PDXDC1">https://www.genecards.org/cgi-bin/carddisp.pl?gene=PDXDC1</a>   |
| MIR29B2 | MicroRNA 29b-2                                                   | RNA Gene       | 18 | GC01M207806 | 4.092883 | <a href="https://www.genecards.org/cgi-bin/carddisp.pl?gene=MIR29B2">https://www.genecards.org/cgi-bin/carddisp.pl?gene=MIR29B2</a> |
| MEF2D   | Myocyte Enhancer Factor 2D                                       | Protein Coding | 45 | GC01M156463 | 4.09202  | <a href="https://www.genecards.org/cgi-bin/carddisp.pl?gene=MEF2D">https://www.genecards.org/cgi-bin/carddisp.pl?gene=MEF2D</a>     |
| SEC16B  | SEC16 Homolog B, Endoplasmic Reticulum Export Factor             | Protein Coding | 38 | GC01M177923 | 4.091877 | <a href="https://www.genecards.org/cgi-bin/carddisp.pl?gene=SEC16B">https://www.genecards.org/cgi-bin/carddisp.pl?gene=SEC16B</a>   |

|           |                                                         |                |    |             |          |                                                                                                                                         |
|-----------|---------------------------------------------------------|----------------|----|-------------|----------|-----------------------------------------------------------------------------------------------------------------------------------------|
| PTGES3    | Prostaglandin E Synthase 3                              | Protein Coding | 44 | GC12M056667 | 4.089228 | <a href="https://www.genecards.org/cgi-bin/carddisp.pl?gene=PTGES3">https://www.genecards.org/cgi-bin/carddisp.pl?gene=PTGES3</a>       |
| ZNF202    | Zinc Finger Protein 202                                 | Protein Coding | 40 | GC11M123724 | 4.088984 | <a href="https://www.genecards.org/cgi-bin/carddisp.pl?gene=ZNF202">https://www.genecards.org/cgi-bin/carddisp.pl?gene=ZNF202</a>       |
| TMBIM6    | Transmembrane BAX Inhibitor Motif Containing 6          | Protein Coding | 37 | GC12P049707 | 4.088861 | <a href="https://www.genecards.org/cgi-bin/carddisp.pl?gene=TMBIM6">https://www.genecards.org/cgi-bin/carddisp.pl?gene=TMBIM6</a>       |
| ATF1      | Activating Transcription Factor 1                       | Protein Coding | 47 | GC12P050763 | 4.086227 | <a href="https://www.genecards.org/cgi-bin/carddisp.pl?gene=ATF1">https://www.genecards.org/cgi-bin/carddisp.pl?gene=ATF1</a>           |
| ANO2      | Anoctamin 2                                             | Protein Coding | 37 | GC12M005532 | 4.08603  | <a href="https://www.genecards.org/cgi-bin/carddisp.pl?gene=ANO2">https://www.genecards.org/cgi-bin/carddisp.pl?gene=ANO2</a>           |
| KPNA4     | Karyopherin Subunit Alpha 4                             | Protein Coding | 43 | GC03M160494 | 4.085062 | <a href="https://www.genecards.org/cgi-bin/carddisp.pl?gene=KPNA4">https://www.genecards.org/cgi-bin/carddisp.pl?gene=KPNA4</a>         |
| ADCY8     | Adenylate Cyclase 8                                     | Protein Coding | 45 | GC08M130780 | 4.084551 | <a href="https://www.genecards.org/cgi-bin/carddisp.pl?gene=ADCY8">https://www.genecards.org/cgi-bin/carddisp.pl?gene=ADCY8</a>         |
| GRB7      | Growth Factor Receptor Bound Protein 7                  | Protein Coding | 44 | GC17P039744 | 4.083256 | <a href="https://www.genecards.org/cgi-bin/carddisp.pl?gene=GRB7">https://www.genecards.org/cgi-bin/carddisp.pl?gene=GRB7</a>           |
| KCNK10    | Potassium Two Pore Domain Channel Subfamily K Member 10 | Protein Coding | 40 | GC14M088180 | 4.082622 | <a href="https://www.genecards.org/cgi-bin/carddisp.pl?gene=KCNK10">https://www.genecards.org/cgi-bin/carddisp.pl?gene=KCNK10</a>       |
| IPPK      | Inositol-Pentakisphosphate 2-Kinase                     | Protein Coding | 38 | GC09M092613 | 4.082585 | <a href="https://www.genecards.org/cgi-bin/carddisp.pl?gene=IPPK">https://www.genecards.org/cgi-bin/carddisp.pl?gene=IPPK</a>           |
| ISYNA1    | Inositol-3-Phosphate Synthase 1                         | Protein Coding | 41 | GC19M018406 | 4.079656 | <a href="https://www.genecards.org/cgi-bin/carddisp.pl?gene=ISYNA1">https://www.genecards.org/cgi-bin/carddisp.pl?gene=ISYNA1</a>       |
| NUDT21    | Nudix Hydrolase 21                                      | Protein Coding | 38 | GC16M056429 | 4.0745   | <a href="https://www.genecards.org/cgi-bin/carddisp.pl?gene=NUDT21">https://www.genecards.org/cgi-bin/carddisp.pl?gene=NUDT21</a>       |
| COX7A1    | Cytochrome C Oxidase Subunit 7A1                        | Protein Coding | 37 | GC19M047084 | 4.07343  | <a href="https://www.genecards.org/cgi-bin/carddisp.pl?gene=COX7A1">https://www.genecards.org/cgi-bin/carddisp.pl?gene=COX7A1</a>       |
| PSME3     | Proteasome Activator Subunit 3                          | Protein Coding | 43 | GC17P042824 | 4.071575 | <a href="https://www.genecards.org/cgi-bin/carddisp.pl?gene=PSME3">https://www.genecards.org/cgi-bin/carddisp.pl?gene=PSME3</a>         |
| MACROH2A2 | MacroH2A.2 Histone                                      | Protein Coding | 30 | GC10P070053 | 4.069562 | <a href="https://www.genecards.org/cgi-bin/carddisp.pl?gene=MACROH2A2">https://www.genecards.org/cgi-bin/carddisp.pl?gene=MACROH2A2</a> |
| PLXND1    | Plexin D1                                               | Protein Coding | 41 | GC03M129555 | 4.069346 | <a href="https://www.genecards.org/cgi-bin/carddisp.pl?gene=PLXND1">https://www.genecards.org/cgi-bin/carddisp.pl?gene=PLXND1</a>       |
| RIPK4     | Receptor Interacting Serine/Threonine Kinase 4          | Protein Coding | 44 | GC21M041739 | 4.068773 | <a href="https://www.genecards.org/cgi-bin/carddisp.pl?gene=RIPK4">https://www.genecards.org/cgi-bin/carddisp.pl?gene=RIPK4</a>         |
| STARD10   | StAR Related Lipid Transfer Domain Containing 10        | Protein Coding | 37 | GC11M072774 | 4.068071 | <a href="https://www.genecards.org/cgi-bin/carddisp.pl?gene=STARD10">https://www.genecards.org/cgi-bin/carddisp.pl?gene=STARD10</a>     |
| RPA2      | Replication Protein A2                                  | Protein Coding | 45 | GC01M027902 | 4.065948 | <a href="https://www.genecards.org/cgi-bin/carddisp.pl?gene=RPA2">https://www.genecards.org/cgi-bin/carddisp.pl?gene=RPA2</a>           |

|             |                                                                                                                                       |                |    |             |          |                                                                                                                                             |
|-------------|---------------------------------------------------------------------------------------------------------------------------------------|----------------|----|-------------|----------|---------------------------------------------------------------------------------------------------------------------------------------------|
| DLEU1       | Deleted In Lymphocytic Leukemia 1                                                                                                     | RNA Gene       | 28 | GC13P050098 | 4.058257 | <a href="https://www.genecards.org/cgi-bin/carddisp.pl?gene=DLEU1">https://www.genecards.org/cgi-bin/carddisp.pl?gene=DLEU1</a>             |
| CBLL1       | Cbl Proto-Oncogene Like 1                                                                                                             | Protein Coding | 37 | GC07P107743 | 4.05614  | <a href="https://www.genecards.org/cgi-bin/carddisp.pl?gene=CBLL1">https://www.genecards.org/cgi-bin/carddisp.pl?gene=CBLL1</a>             |
| EPS8L3      | EPS8 Like 3                                                                                                                           | Protein Coding | 38 | GC01M109751 | 4.055779 | <a href="https://www.genecards.org/cgi-bin/carddisp.pl?gene=EPS8L3">https://www.genecards.org/cgi-bin/carddisp.pl?gene=EPS8L3</a>           |
| PTCD1       | Pentatricopeptide Repeat Domain 1                                                                                                     | Protein Coding | 34 | GC07M099429 | 4.051902 | <a href="https://www.genecards.org/cgi-bin/carddisp.pl?gene=PTCD1">https://www.genecards.org/cgi-bin/carddisp.pl?gene=PTCD1</a>             |
| C1QTNF9     | C1q And TNF Related 9                                                                                                                 | Protein Coding | 34 | GC13P024307 | 4.048708 | <a href="https://www.genecards.org/cgi-bin/carddisp.pl?gene=C1QTNF9">https://www.genecards.org/cgi-bin/carddisp.pl?gene=C1QTNF9</a>         |
| TLCD4-RWDD3 | TLCD4-RWDD3 Readthrough                                                                                                               | Protein Coding | 16 | GC01P095119 | 4.047915 | <a href="https://www.genecards.org/cgi-bin/carddisp.pl?gene=TLCD4-RWDD3">https://www.genecards.org/cgi-bin/carddisp.pl?gene=TLCD4-RWDD3</a> |
| RAP1B       | RAP1B, Member Of RAS Oncogene Family                                                                                                  | Protein Coding | 45 | GC12P068610 | 4.047623 | <a href="https://www.genecards.org/cgi-bin/carddisp.pl?gene=RAP1B">https://www.genecards.org/cgi-bin/carddisp.pl?gene=RAP1B</a>             |
| UCN2        | Urocortin 2                                                                                                                           | Protein Coding | 34 | GC03M048561 | 4.046426 | <a href="https://www.genecards.org/cgi-bin/carddisp.pl?gene=UCN2">https://www.genecards.org/cgi-bin/carddisp.pl?gene=UCN2</a>               |
| HNRNPR      | Heterogeneous Nuclear Ribonucleoprotein R                                                                                             | Protein Coding | 40 | GC01M023303 | 4.04319  | <a href="https://www.genecards.org/cgi-bin/carddisp.pl?gene=HNRNPR">https://www.genecards.org/cgi-bin/carddisp.pl?gene=HNRNPR</a>           |
| GSTK1       | Glutathione S-Transferase Kappa 1                                                                                                     | Protein Coding | 42 | GC07P145809 | 4.041059 | <a href="https://www.genecards.org/cgi-bin/carddisp.pl?gene=GSTK1">https://www.genecards.org/cgi-bin/carddisp.pl?gene=GSTK1</a>             |
| ATAD2       | ATPase Family AAA Domain Containing 2 SWI/SNF Related, Matrix Associated, Actin Dependent Regulator Of Chromatin Subfamily C Member 1 | Protein Coding | 40 | GC08M123319 | 4.03664  | <a href="https://www.genecards.org/cgi-bin/carddisp.pl?gene=ATAD2">https://www.genecards.org/cgi-bin/carddisp.pl?gene=ATAD2</a>             |
| SMARCC1     | Glycerophosphodiester Phosphodiesterase 1                                                                                             | Protein Coding | 44 | GC03M047585 | 4.035441 | <a href="https://www.genecards.org/cgi-bin/carddisp.pl?gene=SMARCC1">https://www.genecards.org/cgi-bin/carddisp.pl?gene=SMARCC1</a>         |
| GDE1        | SIM BHLH Transcription Factor 1                                                                                                       | Protein Coding | 37 | GC16M019513 | 4.034425 | <a href="https://www.genecards.org/cgi-bin/carddisp.pl?gene=GDE1">https://www.genecards.org/cgi-bin/carddisp.pl?gene=GDE1</a>               |
| SIM1        | Homeobox C13                                                                                                                          | Protein Coding | 41 | GC06M100386 | 4.033214 | <a href="https://www.genecards.org/cgi-bin/carddisp.pl?gene=SIM1">https://www.genecards.org/cgi-bin/carddisp.pl?gene=SIM1</a>               |
| HOXC13      | Solute Carrier Family 7 Member 11                                                                                                     | Protein Coding | 41 | GC12P053938 | 4.031942 | <a href="https://www.genecards.org/cgi-bin/carddisp.pl?gene=HOXC13">https://www.genecards.org/cgi-bin/carddisp.pl?gene=HOXC13</a>           |
| SLC7A11     | Eukaryotic Translation Initiation Factor 3 Subunit B                                                                                  | Protein Coding | 45 | GC04M138164 | 4.026815 | <a href="https://www.genecards.org/cgi-bin/carddisp.pl?gene=SLC7A11">https://www.genecards.org/cgi-bin/carddisp.pl?gene=SLC7A11</a>         |
| EIF3B       |                                                                                                                                       | Protein Coding | 40 | GC07P002354 | 4.025175 | <a href="https://www.genecards.org/cgi-bin/carddisp.pl?gene=EIF3B">https://www.genecards.org/cgi-bin/carddisp.pl?gene=EIF3B</a>             |



|        |                                                     |                |    |             |          |                                                                                                                                   |
|--------|-----------------------------------------------------|----------------|----|-------------|----------|-----------------------------------------------------------------------------------------------------------------------------------|
| INTS5  | Integrator Complex Subunit 5                        | Protein Coding | 35 | GC11M069255 | 4.022593 | <a href="https://www.genecards.org/cgi-bin/carddisp.pl?gene=INTS5">https://www.genecards.org/cgi-bin/carddisp.pl?gene=INTS5</a>   |
| PEA15  | Proliferation And Apoptosis Adaptor Protein 15      | Protein Coding | 44 | GC01P160205 | 4.0219   | <a href="https://www.genecards.org/cgi-bin/carddisp.pl?gene=PEA15">https://www.genecards.org/cgi-bin/carddisp.pl?gene=PEA15</a>   |
| AFAP1  | Actin Filament Associated Protein 1                 | Protein Coding | 39 | GC04M007758 | 4.019042 | <a href="https://www.genecards.org/cgi-bin/carddisp.pl?gene=AFAP1">https://www.genecards.org/cgi-bin/carddisp.pl?gene=AFAP1</a>   |
| ILVBL  | IlvB Acetolactate Synthase Like                     | Protein Coding | 38 | GC19M015116 | 4.017715 | <a href="https://www.genecards.org/cgi-bin/carddisp.pl?gene=ILVBL">https://www.genecards.org/cgi-bin/carddisp.pl?gene=ILVBL</a>   |
| TCP1   | T-Complex 1                                         | Protein Coding | 41 | GC06M159778 | 4.017245 | <a href="https://www.genecards.org/cgi-bin/carddisp.pl?gene=TCP1">https://www.genecards.org/cgi-bin/carddisp.pl?gene=TCP1</a>     |
| MPZL1  | Myelin Protein Zero Like 1                          | Protein Coding | 41 | GC01P167721 | 4.017209 | <a href="https://www.genecards.org/cgi-bin/carddisp.pl?gene=MPZL1">https://www.genecards.org/cgi-bin/carddisp.pl?gene=MPZL1</a>   |
| CAMKMT | Calmodulin-Lysine N-Methyltransferase               | Protein Coding | 36 | GC02P044361 | 4.016611 | <a href="https://www.genecards.org/cgi-bin/carddisp.pl?gene=CAMKMT">https://www.genecards.org/cgi-bin/carddisp.pl?gene=CAMKMT</a> |
| RIOK2  | RIO Kinase 2                                        | Protein Coding | 41 | GC05M097160 | 4.015095 | <a href="https://www.genecards.org/cgi-bin/carddisp.pl?gene=RIOK2">https://www.genecards.org/cgi-bin/carddisp.pl?gene=RIOK2</a>   |
| FLRT1  | Fibronectin Leucine Rich Transmembrane Protein 1    | Protein Coding | 40 | GC11P064036 | 4.012539 | <a href="https://www.genecards.org/cgi-bin/carddisp.pl?gene=FLRT1">https://www.genecards.org/cgi-bin/carddisp.pl?gene=FLRT1</a>   |
| RNF7   | Ring Finger Protein 7                               | Protein Coding | 43 | GC03P141738 | 4.011736 | <a href="https://www.genecards.org/cgi-bin/carddisp.pl?gene=RNF7">https://www.genecards.org/cgi-bin/carddisp.pl?gene=RNF7</a>     |
| RRAGC  | Ras Related GTP Binding C                           | Protein Coding | 43 | GC01M038847 | 4.002389 | <a href="https://www.genecards.org/cgi-bin/carddisp.pl?gene=RRAGC">https://www.genecards.org/cgi-bin/carddisp.pl?gene=RRAGC</a>   |
| EBF1   | EBF Transcription Factor 1                          | Protein Coding | 41 | GC05M158695 | 4.000239 | <a href="https://www.genecards.org/cgi-bin/carddisp.pl?gene=EBF1">https://www.genecards.org/cgi-bin/carddisp.pl?gene=EBF1</a>     |
| RBM38  | RNA Binding Motif Protein 38                        | Protein Coding | 37 | GC20P057391 | 3.999289 | <a href="https://www.genecards.org/cgi-bin/carddisp.pl?gene=RBM38">https://www.genecards.org/cgi-bin/carddisp.pl?gene=RBM38</a>   |
| TUNAR  | TCL1 Upstream Neural Differentiation-Associated RNA | RNA Gene       | 16 | GC14P095876 | 3.998121 | <a href="https://www.genecards.org/cgi-bin/carddisp.pl?gene=TUNAR">https://www.genecards.org/cgi-bin/carddisp.pl?gene=TUNAR</a>   |
| GRK6   | G Protein-Coupled Receptor Kinase 6                 | Protein Coding | 45 | GC05P177403 | 3.997712 | <a href="https://www.genecards.org/cgi-bin/carddisp.pl?gene=GRK6">https://www.genecards.org/cgi-bin/carddisp.pl?gene=GRK6</a>     |
| SPRR1B | Small Proline Rich Protein 1B                       | Protein Coding | 37 | GC01P153031 | 3.993895 | <a href="https://www.genecards.org/cgi-bin/carddisp.pl?gene=SPRR1B">https://www.genecards.org/cgi-bin/carddisp.pl?gene=SPRR1B</a> |
| CCNT2  | Cyclin T2                                           | Protein Coding | 39 | GC02P134918 | 3.991917 | <a href="https://www.genecards.org/cgi-bin/carddisp.pl?gene=CCNT2">https://www.genecards.org/cgi-bin/carddisp.pl?gene=CCNT2</a>   |
| NLRP6  | NLR Family Pyrin Domain Containing 6                | Protein Coding | 38 | GC11P000269 | 3.990225 | <a href="https://www.genecards.org/cgi-bin/carddisp.pl?gene=NLRP6">https://www.genecards.org/cgi-bin/carddisp.pl?gene=NLRP6</a>   |
| MYO1C  | Myosin IC                                           | Protein Coding | 44 | GC17M001464 | 3.990014 | <a href="https://www.genecards.org/cgi-bin/carddisp.pl?gene=MYO1C">https://www.genecards.org/cgi-bin/carddisp.pl?gene=MYO1C</a>   |

|         |                                                                                       |                |    |             |          |                                                                                                                                     |
|---------|---------------------------------------------------------------------------------------|----------------|----|-------------|----------|-------------------------------------------------------------------------------------------------------------------------------------|
| FBXO5   | F-Box Protein 5                                                                       | Protein Coding | 38 | GC06M152970 | 3.988118 | <a href="https://www.genecards.org/cgi-bin/carddisp.pl?gene=FBXO5">https://www.genecards.org/cgi-bin/carddisp.pl?gene=FBXO5</a>     |
| SFRP5   | Secreted Frizzled Related Protein 5                                                   | Protein Coding | 40 | GC10M097766 | 3.984463 | <a href="https://www.genecards.org/cgi-bin/carddisp.pl?gene=SFRP5">https://www.genecards.org/cgi-bin/carddisp.pl?gene=SFRP5</a>     |
| SEC16A  | SEC16 Homolog A, Endoplasmic Reticulum Export Factor                                  | Protein Coding | 37 | GC09M136440 | 3.98049  | <a href="https://www.genecards.org/cgi-bin/carddisp.pl?gene=SEC16A">https://www.genecards.org/cgi-bin/carddisp.pl?gene=SEC16A</a>   |
| CLDN5   | Claudin 5                                                                             | Protein Coding | 43 | GC22M019523 | 3.97901  | <a href="https://www.genecards.org/cgi-bin/carddisp.pl?gene=CLDN5">https://www.genecards.org/cgi-bin/carddisp.pl?gene=CLDN5</a>     |
| PHF2    | PHD Finger Protein 2                                                                  | Protein Coding | 39 | GC09P093576 | 3.975384 | <a href="https://www.genecards.org/cgi-bin/carddisp.pl?gene=PHF2">https://www.genecards.org/cgi-bin/carddisp.pl?gene=PHF2</a>       |
| TOM1    | Target Of Myb1 Membrane Trafficking Protein                                           | Protein Coding | 43 | GC22P035299 | 3.970874 | <a href="https://www.genecards.org/cgi-bin/carddisp.pl?gene=TOM1">https://www.genecards.org/cgi-bin/carddisp.pl?gene=TOM1</a>       |
| TOX3    | TOX High Mobility Group Box Family Member 3                                           | Protein Coding | 38 | GC16M052440 | 3.96215  | <a href="https://www.genecards.org/cgi-bin/carddisp.pl?gene=TOX3">https://www.genecards.org/cgi-bin/carddisp.pl?gene=TOX3</a>       |
| ATP5MJ  | ATP Synthase Membrane Subunit J                                                       | Protein Coding | 27 | GC14M103917 | 3.96122  | <a href="https://www.genecards.org/cgi-bin/carddisp.pl?gene=ATP5MJ">https://www.genecards.org/cgi-bin/carddisp.pl?gene=ATP5MJ</a>   |
| SCP2D1  | SCP2 Sterol Binding Domain Containing 1                                               | Protein Coding | 29 | GC20P018813 | 3.960956 | <a href="https://www.genecards.org/cgi-bin/carddisp.pl?gene=SCP2D1">https://www.genecards.org/cgi-bin/carddisp.pl?gene=SCP2D1</a>   |
| RAD52   | RAD52 Homolog, DNA Repair Protein                                                     | Protein Coding | 42 | GC12M000912 | 3.958795 | <a href="https://www.genecards.org/cgi-bin/carddisp.pl?gene=RAD52">https://www.genecards.org/cgi-bin/carddisp.pl?gene=RAD52</a>     |
| SP4     | Sp4 Transcription Factor                                                              | Protein Coding | 42 | GC07P021434 | 3.957705 | <a href="https://www.genecards.org/cgi-bin/carddisp.pl?gene=SP4">https://www.genecards.org/cgi-bin/carddisp.pl?gene=SP4</a>         |
| TRADD   | TNFRSF1A Associated Via Death Domain                                                  | Protein Coding | 44 | GC16M067154 | 3.957182 | <a href="https://www.genecards.org/cgi-bin/carddisp.pl?gene=TRADD">https://www.genecards.org/cgi-bin/carddisp.pl?gene=TRADD</a>     |
| RPS8    | Ribosomal Protein S8                                                                  | Protein Coding | 40 | GC01P044775 | 3.949356 | <a href="https://www.genecards.org/cgi-bin/carddisp.pl?gene=RPS8">https://www.genecards.org/cgi-bin/carddisp.pl?gene=RPS8</a>       |
| KIR2DS1 | Killer Cell Immunoglobulin Like Receptor, Two Ig Domains And Short Cytoplasmic Tail 1 | Protein Coding | 23 | GC19Mr00063 | 3.948604 | <a href="https://www.genecards.org/cgi-bin/carddisp.pl?gene=KIR2DS1">https://www.genecards.org/cgi-bin/carddisp.pl?gene=KIR2DS1</a> |
| RPL23A  | Ribosomal Protein L23a                                                                | Protein Coding | 42 | GC17P028719 | 3.946427 | <a href="https://www.genecards.org/cgi-bin/carddisp.pl?gene=RPL23A">https://www.genecards.org/cgi-bin/carddisp.pl?gene=RPL23A</a>   |
| RGS2    | Regulator Of G Protein Signaling 2                                                    | Protein Coding | 43 | GC01P192809 | 3.94433  | <a href="https://www.genecards.org/cgi-bin/carddisp.pl?gene=RGS2">https://www.genecards.org/cgi-bin/carddisp.pl?gene=RGS2</a>       |

|           |                                                         |                |    |             |          |                                                                                                                                         |
|-----------|---------------------------------------------------------|----------------|----|-------------|----------|-----------------------------------------------------------------------------------------------------------------------------------------|
| NDUFA7    | NADH:Ubiquinone Oxidoreductase Subunit A7               | Protein Coding | 38 | GC19M008308 | 3.93049  | <a href="https://www.genecards.org/cgi-bin/carddisp.pl?gene=NDUFA7">https://www.genecards.org/cgi-bin/carddisp.pl?gene=NDUFA7</a>       |
| PDF       | Peptide Deformylase, Mitochondrial                      | Protein Coding | 35 | GC16M069656 | 3.927101 | <a href="https://www.genecards.org/cgi-bin/carddisp.pl?gene=PDF">https://www.genecards.org/cgi-bin/carddisp.pl?gene=PDF</a>             |
| RUVBL2    | RuvB Like AAA ATPase 2                                  | Protein Coding | 45 | GC19P048993 | 3.926382 | <a href="https://www.genecards.org/cgi-bin/carddisp.pl?gene=RUVBL2">https://www.genecards.org/cgi-bin/carddisp.pl?gene=RUVBL2</a>       |
| MTMR9     | Myotubularin Related Protein 9                          | Protein Coding | 38 | GC08P011284 | 3.91943  | <a href="https://www.genecards.org/cgi-bin/carddisp.pl?gene=MTMR9">https://www.genecards.org/cgi-bin/carddisp.pl?gene=MTMR9</a>         |
| OLA1      | Obg Like ATPase 1                                       | Protein Coding | 43 | GC02M174072 | 3.915539 | <a href="https://www.genecards.org/cgi-bin/carddisp.pl?gene=OLA1">https://www.genecards.org/cgi-bin/carddisp.pl?gene=OLA1</a>           |
| PLPPR4    | Phospholipid Phosphatase Related 4                      | Protein Coding | 31 | GC01P099262 | 3.913586 | <a href="https://www.genecards.org/cgi-bin/carddisp.pl?gene=PLPPR4">https://www.genecards.org/cgi-bin/carddisp.pl?gene=PLPPR4</a>       |
| NCS1      | Neuronal Calcium Sensor 1                               | Protein Coding | 43 | GC09P130172 | 3.909512 | <a href="https://www.genecards.org/cgi-bin/carddisp.pl?gene=NCS1">https://www.genecards.org/cgi-bin/carddisp.pl?gene=NCS1</a>           |
| PPP1R12A  | Protein Phosphatase 1 Regulatory Subunit 12A            | Protein Coding | 44 | GC12M079773 | 3.907771 | <a href="https://www.genecards.org/cgi-bin/carddisp.pl?gene=PPP1R12A">https://www.genecards.org/cgi-bin/carddisp.pl?gene=PPP1R12A</a>   |
| CHML      | CHM Like Rab Escort Protein                             | Protein Coding | 38 | GC01M241628 | 3.905396 | <a href="https://www.genecards.org/cgi-bin/carddisp.pl?gene=CHML">https://www.genecards.org/cgi-bin/carddisp.pl?gene=CHML</a>           |
| CCT2      | Chaperonin Containing TCP1 Subunit 2                    | Protein Coding | 41 | GC12P069585 | 3.9032   | <a href="https://www.genecards.org/cgi-bin/carddisp.pl?gene=CCT2">https://www.genecards.org/cgi-bin/carddisp.pl?gene=CCT2</a>           |
| ACTL6B    | Actin Like 6B                                           | Protein Coding | 43 | GC07M100643 | 3.902606 | <a href="https://www.genecards.org/cgi-bin/carddisp.pl?gene=ACTL6B">https://www.genecards.org/cgi-bin/carddisp.pl?gene=ACTL6B</a>       |
| MIRLET7F1 | MicroRNA Let-7f-1                                       | RNA Gene       | 19 | GC09P094193 | 3.900208 | <a href="https://www.genecards.org/cgi-bin/carddisp.pl?gene=MIRLET7F1">https://www.genecards.org/cgi-bin/carddisp.pl?gene=MIRLET7F1</a> |
| PLEKHA1   | Pleckstrin Homology Domain Containing A1                | Protein Coding | 42 | GC10P122374 | 3.896281 | <a href="https://www.genecards.org/cgi-bin/carddisp.pl?gene=PLEKHA1">https://www.genecards.org/cgi-bin/carddisp.pl?gene=PLEKHA1</a>     |
| SPATA13   | Spermatogenesis Associated 13                           | Protein Coding | 38 | GC13P024016 | 3.895677 | <a href="https://www.genecards.org/cgi-bin/carddisp.pl?gene=SPATA13">https://www.genecards.org/cgi-bin/carddisp.pl?gene=SPATA13</a>     |
| USP15     | Ubiquitin Specific Peptidase 15                         | Protein Coding | 48 | GC12P062260 | 3.894948 | <a href="https://www.genecards.org/cgi-bin/carddisp.pl?gene=USP15">https://www.genecards.org/cgi-bin/carddisp.pl?gene=USP15</a>         |
| PCSK7     | Proprotein Convertase Subtilisin/Kexin Type 7           | Protein Coding | 44 | GC11M117199 | 3.892378 | <a href="https://www.genecards.org/cgi-bin/carddisp.pl?gene=PCSK7">https://www.genecards.org/cgi-bin/carddisp.pl?gene=PCSK7</a>         |
| ATHS      | Atherosclerosis Susceptibility (Lipoprotein Associated) | Genetic Locus  | 4  | GC19U990005 | 3.891316 | <a href="https://www.genecards.org/cgi-bin/carddisp.pl?gene=ATHS">https://www.genecards.org/cgi-bin/carddisp.pl?gene=ATHS</a>           |
| ZNF512    | Zinc Finger Protein 512                                 | Protein Coding | 32 | GC02P027582 | 3.890964 | <a href="https://www.genecards.org/cgi-bin/carddisp.pl?gene=ZNF512">https://www.genecards.org/cgi-bin/carddisp.pl?gene=ZNF512</a>       |

|         |                                                                              |                |    |             |          |                                                                                                                                     |
|---------|------------------------------------------------------------------------------|----------------|----|-------------|----------|-------------------------------------------------------------------------------------------------------------------------------------|
| PABPC4  | Poly(A) Binding Protein Cytoplasmic 4                                        | Protein Coding | 42 | GC01M039560 | 3.883965 | <a href="https://www.genecards.org/cgi-bin/carddisp.pl?gene=PABPC4">https://www.genecards.org/cgi-bin/carddisp.pl?gene=PABPC4</a>   |
| SEC22B  | SEC22 Homolog B, Vesicle Trafficking Protein                                 | Protein Coding | 36 | GC01M120150 | 3.879227 | <a href="https://www.genecards.org/cgi-bin/carddisp.pl?gene=SEC22B">https://www.genecards.org/cgi-bin/carddisp.pl?gene=SEC22B</a>   |
| PABIR1  | PP2A Aalpha (PPP2R1A) And B55A (PPP2R2A) Interacting Phosphatase Regulator 1 | Protein Coding | 25 | GC09P068781 | 3.878857 | <a href="https://www.genecards.org/cgi-bin/carddisp.pl?gene=PABIR1">https://www.genecards.org/cgi-bin/carddisp.pl?gene=PABIR1</a>   |
| ABI3    | ABI Family Member 3 RNA                                                      | Protein Coding | 38 | GC17P049210 | 3.876922 | <a href="https://www.genecards.org/cgi-bin/carddisp.pl?gene=ABI3">https://www.genecards.org/cgi-bin/carddisp.pl?gene=ABI3</a>       |
| RTRAF   | Transcription, Translation And Transport Factor                              | Protein Coding | 29 | GC14P051992 | 3.875666 | <a href="https://www.genecards.org/cgi-bin/carddisp.pl?gene=RTRAF">https://www.genecards.org/cgi-bin/carddisp.pl?gene=RTRAF</a>     |
| KCNA4   | Potassium Voltage-Gated Channel Subfamily A Member 4                         | Protein Coding | 44 | GC11M030009 | 3.871591 | <a href="https://www.genecards.org/cgi-bin/carddisp.pl?gene=KCNA4">https://www.genecards.org/cgi-bin/carddisp.pl?gene=KCNA4</a>     |
| STAMBP  | STAM Binding Protein                                                         | Protein Coding | 47 | GC02P073828 | 3.871397 | <a href="https://www.genecards.org/cgi-bin/carddisp.pl?gene=STAMBP">https://www.genecards.org/cgi-bin/carddisp.pl?gene=STAMBP</a>   |
| RWDD3   | RWD Domain Containing 3                                                      | Protein Coding | 36 | GC01P095171 | 3.868048 | <a href="https://www.genecards.org/cgi-bin/carddisp.pl?gene=RWDD3">https://www.genecards.org/cgi-bin/carddisp.pl?gene=RWDD3</a>     |
| MAPK13  | Mitogen-Activated Protein Kinase 13                                          | Protein Coding | 48 | GC06P055340 | 3.867134 | <a href="https://www.genecards.org/cgi-bin/carddisp.pl?gene=MAPK13">https://www.genecards.org/cgi-bin/carddisp.pl?gene=MAPK13</a>   |
| CUL5    | Cullin 5                                                                     | Protein Coding | 45 | GC11P108008 | 3.865067 | <a href="https://www.genecards.org/cgi-bin/carddisp.pl?gene=CUL5">https://www.genecards.org/cgi-bin/carddisp.pl?gene=CUL5</a>       |
| SDK1    | Sidekick Cell Adhesion Molecule 1                                            | Protein Coding | 36 | GC07P003307 | 3.860195 | <a href="https://www.genecards.org/cgi-bin/carddisp.pl?gene=SDK1">https://www.genecards.org/cgi-bin/carddisp.pl?gene=SDK1</a>       |
| TUT1    | Terminal Uridylyl Transferase 1, U6 SnRNA-Specific                           | Protein Coding | 36 | GC11M069245 | 3.857761 | <a href="https://www.genecards.org/cgi-bin/carddisp.pl?gene=TUT1">https://www.genecards.org/cgi-bin/carddisp.pl?gene=TUT1</a>       |
| SLC30A2 | Solute Carrier Family 30 Member 2                                            | Protein Coding | 44 | GC01M026048 | 3.856939 | <a href="https://www.genecards.org/cgi-bin/carddisp.pl?gene=SLC30A2">https://www.genecards.org/cgi-bin/carddisp.pl?gene=SLC30A2</a> |
| RRBP1   | Ribosome Binding Protein 1                                                   | Protein Coding | 40 | GC20M017613 | 3.853372 | <a href="https://www.genecards.org/cgi-bin/carddisp.pl?gene=RRBP1">https://www.genecards.org/cgi-bin/carddisp.pl?gene=RRBP1</a>     |
| ADGRL2  | Adhesion G Protein-Coupled Receptor L2                                       | Protein Coding | 38 | GC01P081306 | 3.850107 | <a href="https://www.genecards.org/cgi-bin/carddisp.pl?gene=ADGRL2">https://www.genecards.org/cgi-bin/carddisp.pl?gene=ADGRL2</a>   |
| SELENOO | Selenoprotein O                                                              | Protein Coding | 24 | GC22P050201 | 3.84838  | <a href="https://www.genecards.org/cgi-bin/carddisp.pl?gene=SELENOO">https://www.genecards.org/cgi-bin/carddisp.pl?gene=SELENOO</a> |

|         |                                                                 |                |    |             |          |                                                                                                                                     |
|---------|-----------------------------------------------------------------|----------------|----|-------------|----------|-------------------------------------------------------------------------------------------------------------------------------------|
| MIR1296 | MicroRNA 1296                                                   | RNA Gene       | 16 | GC10M063372 | 3.842494 | <a href="https://www.genecards.org/cgi-bin/carddisp.pl?gene=MIR1296">https://www.genecards.org/cgi-bin/carddisp.pl?gene=MIR1296</a> |
| SYT14   | Synaptotagmin 14                                                | Protein Coding | 38 | GC01P209900 | 3.841401 | <a href="https://www.genecards.org/cgi-bin/carddisp.pl?gene=SYT14">https://www.genecards.org/cgi-bin/carddisp.pl?gene=SYT14</a>     |
| SRRM1   | Serine And Arginine Repetitive Matrix 1                         | Protein Coding | 38 | GC01P024631 | 3.840693 | <a href="https://www.genecards.org/cgi-bin/carddisp.pl?gene=SRRM1">https://www.genecards.org/cgi-bin/carddisp.pl?gene=SRRM1</a>     |
| CHCHD3  | Coiled-Coil-Helix-Coiled-Coil-Helix Domain Containing 3         | Protein Coding | 38 | GC07M132784 | 3.840507 | <a href="https://www.genecards.org/cgi-bin/carddisp.pl?gene=CHCHD3">https://www.genecards.org/cgi-bin/carddisp.pl?gene=CHCHD3</a>   |
| SLC22A8 | Solute Carrier Family 22 Member 8                               | Protein Coding | 43 | GC11M069279 | 3.837129 | <a href="https://www.genecards.org/cgi-bin/carddisp.pl?gene=SLC22A8">https://www.genecards.org/cgi-bin/carddisp.pl?gene=SLC22A8</a> |
| RGS19   | Regulator Of G Protein Signaling 19                             | Protein Coding | 41 | GC20M064073 | 3.836257 | <a href="https://www.genecards.org/cgi-bin/carddisp.pl?gene=RGS19">https://www.genecards.org/cgi-bin/carddisp.pl?gene=RGS19</a>     |
| AATF    | Apoptosis Antagonizing Transcription Factor                     | Protein Coding | 40 | GC17P036948 | 3.835102 | <a href="https://www.genecards.org/cgi-bin/carddisp.pl?gene=AATF">https://www.genecards.org/cgi-bin/carddisp.pl?gene=AATF</a>       |
| FGFRL1  | Fibroblast Growth Factor Receptor Like 1                        | Protein Coding | 43 | GC04P001058 | 3.832848 | <a href="https://www.genecards.org/cgi-bin/carddisp.pl?gene=FGFRL1">https://www.genecards.org/cgi-bin/carddisp.pl?gene=FGFRL1</a>   |
| SSR3    | Signal Sequence Receptor Subunit 3                              | Protein Coding | 38 | GC03M156540 | 3.832595 | <a href="https://www.genecards.org/cgi-bin/carddisp.pl?gene=SSR3">https://www.genecards.org/cgi-bin/carddisp.pl?gene=SSR3</a>       |
| CCNA1   | Cyclin A1                                                       | Protein Coding | 43 | GC13P036431 | 3.832235 | <a href="https://www.genecards.org/cgi-bin/carddisp.pl?gene=CCNA1">https://www.genecards.org/cgi-bin/carddisp.pl?gene=CCNA1</a>     |
| SENP1   | SUMO Specific Peptidase 1                                       | Protein Coding | 43 | GC12M048042 | 3.83194  | <a href="https://www.genecards.org/cgi-bin/carddisp.pl?gene=SENP1">https://www.genecards.org/cgi-bin/carddisp.pl?gene=SENP1</a>     |
| CCT3    | Chaperonin Containing TCP1 Subunit 3                            | Protein Coding | 42 | GC01M156308 | 3.822279 | <a href="https://www.genecards.org/cgi-bin/carddisp.pl?gene=CCT3">https://www.genecards.org/cgi-bin/carddisp.pl?gene=CCT3</a>       |
| ARL15   | ADP Ribosylation Factor Like GTPase 15                          | Protein Coding | 36 | GC05M053883 | 3.821368 | <a href="https://www.genecards.org/cgi-bin/carddisp.pl?gene=ARL15">https://www.genecards.org/cgi-bin/carddisp.pl?gene=ARL15</a>     |
| TTK     | TTK Protein Kinase                                              | Protein Coding | 48 | GC06P080003 | 3.820232 | <a href="https://www.genecards.org/cgi-bin/carddisp.pl?gene=TTK">https://www.genecards.org/cgi-bin/carddisp.pl?gene=TTK</a>         |
| WDR7    | WD Repeat Domain 7                                              | Protein Coding | 34 | GC18P056651 | 3.814718 | <a href="https://www.genecards.org/cgi-bin/carddisp.pl?gene=WDR7">https://www.genecards.org/cgi-bin/carddisp.pl?gene=WDR7</a>       |
| TIE1    | Tyrosine Kinase With Immunoglobulin Like And EGF Like Domains 1 | Protein Coding | 43 | GC01P043300 | 3.808009 | <a href="https://www.genecards.org/cgi-bin/carddisp.pl?gene=TIE1">https://www.genecards.org/cgi-bin/carddisp.pl?gene=TIE1</a>       |
| ATP10D  | ATPase Phospholipid Transporting 10D (Putative)                 | Protein Coding | 39 | GC04P047490 | 3.807865 | <a href="https://www.genecards.org/cgi-bin/carddisp.pl?gene=ATP10D">https://www.genecards.org/cgi-bin/carddisp.pl?gene=ATP10D</a>   |

|              |                                                       |                |    |             |          |                                                                                                                                               |
|--------------|-------------------------------------------------------|----------------|----|-------------|----------|-----------------------------------------------------------------------------------------------------------------------------------------------|
| H3C3         | H3 Clustered Histone 3 Interferon                     | Protein Coding | 31 | GC06P054978 | 3.804129 | <a href="https://www.genecards.org/cgi-bin/carddisp.pl?gene=H3C3">https://www.genecards.org/cgi-bin/carddisp.pl?gene=H3C3</a>                 |
| IFIT3        | Induced Protein With Tetratricopeptide Repeats 3      | Protein Coding | 39 | GC10P089327 | 3.799982 | <a href="https://www.genecards.org/cgi-bin/carddisp.pl?gene=IFIT3">https://www.genecards.org/cgi-bin/carddisp.pl?gene=IFIT3</a>               |
| COX8C        | Cytochrome C Oxidase Subunit 8C                       | Protein Coding | 32 | GC14P093348 | 3.797909 | <a href="https://www.genecards.org/cgi-bin/carddisp.pl?gene=COX8C">https://www.genecards.org/cgi-bin/carddisp.pl?gene=COX8C</a>               |
| CUTA         | CutA Divalent Cation Tolerance Homolog                | Protein Coding | 36 | GC06M046993 | 3.797663 | <a href="https://www.genecards.org/cgi-bin/carddisp.pl?gene=CUTA">https://www.genecards.org/cgi-bin/carddisp.pl?gene=CUTA</a>                 |
| LOC101928118 | Uncharacterized LOC101928118 RNA                      | RNA Gene       | 11 | GC01M095163 | 3.790787 | <a href="https://www.genecards.org/cgi-bin/carddisp.pl?gene=LOC101928118">https://www.genecards.org/cgi-bin/carddisp.pl?gene=LOC101928118</a> |
| RNGTT        | Guanylyltransferase And 5'-Phosphatase                | Protein Coding | 44 | GC06M088609 | 3.789963 | <a href="https://www.genecards.org/cgi-bin/carddisp.pl?gene=RNGTT">https://www.genecards.org/cgi-bin/carddisp.pl?gene=RNGTT</a>               |
| SYT7         | Synaptotagmin 7                                       | Protein Coding | 40 | GC11M061513 | 3.787489 | <a href="https://www.genecards.org/cgi-bin/carddisp.pl?gene=SYT7">https://www.genecards.org/cgi-bin/carddisp.pl?gene=SYT7</a>                 |
| ITFG1        | Integrin Alpha FG-GAP Repeat Containing 1             | Protein Coding | 37 | GC16M047156 | 3.785235 | <a href="https://www.genecards.org/cgi-bin/carddisp.pl?gene=ITFG1">https://www.genecards.org/cgi-bin/carddisp.pl?gene=ITFG1</a>               |
| METTL14      | Methyltransferase Like 14                             | Protein Coding | 38 | GC04P118685 | 3.782868 | <a href="https://www.genecards.org/cgi-bin/carddisp.pl?gene=METTL14">https://www.genecards.org/cgi-bin/carddisp.pl?gene=METTL14</a>           |
| MAP4K4       | Mitogen-Activated Protein Kinase Kinase Kinase 4      | Protein Coding | 48 | GC02P101773 | 3.778296 | <a href="https://www.genecards.org/cgi-bin/carddisp.pl?gene=MAP4K4">https://www.genecards.org/cgi-bin/carddisp.pl?gene=MAP4K4</a>             |
| GPAA1        | Glycosylphosphatidylinositol Anchor Attachment 1      | Protein Coding | 43 | GC08P144082 | 3.777599 | <a href="https://www.genecards.org/cgi-bin/carddisp.pl?gene=GPAA1">https://www.genecards.org/cgi-bin/carddisp.pl?gene=GPAA1</a>               |
| ID4          | Inhibitor Of DNA Binding 4, HLH Protein               | Protein Coding | 40 | GC06P019837 | 3.774964 | <a href="https://www.genecards.org/cgi-bin/carddisp.pl?gene=ID4">https://www.genecards.org/cgi-bin/carddisp.pl?gene=ID4</a>                   |
| NDUFB1       | NADH:Ubiquinone Oxidoreductase Subunit B1             | Protein Coding | 37 | GC14M092116 | 3.77119  | <a href="https://www.genecards.org/cgi-bin/carddisp.pl?gene=NDUFB1">https://www.genecards.org/cgi-bin/carddisp.pl?gene=NDUFB1</a>             |
| BRMS1        | BRMS1 Transcriptional Repressor And Anoikis Regulator | Protein Coding | 38 | GC11M069459 | 3.768492 | <a href="https://www.genecards.org/cgi-bin/carddisp.pl?gene=BRMS1">https://www.genecards.org/cgi-bin/carddisp.pl?gene=BRMS1</a>               |
| RBM5         | RNA Binding Motif Protein 5                           | Protein Coding | 40 | GC03P050139 | 3.759135 | <a href="https://www.genecards.org/cgi-bin/carddisp.pl?gene=RBM5">https://www.genecards.org/cgi-bin/carddisp.pl?gene=RBM5</a>                 |
| BDH2         | 3-Hydroxybutyrate Dehydrogenase 2                     | Protein Coding | 39 | GC04M103077 | 3.753363 | <a href="https://www.genecards.org/cgi-bin/carddisp.pl?gene=BDH2">https://www.genecards.org/cgi-bin/carddisp.pl?gene=BDH2</a>                 |

|         |                                                                 |                |    |             |          |                                                                                                                                     |
|---------|-----------------------------------------------------------------|----------------|----|-------------|----------|-------------------------------------------------------------------------------------------------------------------------------------|
| SF3B3   | Splicing Factor 3b Subunit 3<br>Nuclear Casein Kinase And       | Protein Coding | 40 | GC16P070523 | 3.752798 | <a href="https://www.genecards.org/cgi-bin/carddisp.pl?gene=SF3B3">https://www.genecards.org/cgi-bin/carddisp.pl?gene=SF3B3</a>     |
| NUCKS1  | Cyclin Dependent Kinase Substrate 1                             | Protein Coding | 36 | GC01M205712 | 3.750539 | <a href="https://www.genecards.org/cgi-bin/carddisp.pl?gene=NUCKS1">https://www.genecards.org/cgi-bin/carddisp.pl?gene=NUCKS1</a>   |
| TACC1   | Transforming Acidic Coiled-Coil Containing Protein 1            | Protein Coding | 41 | GC08P038728 | 3.749468 | <a href="https://www.genecards.org/cgi-bin/carddisp.pl?gene=TACC1">https://www.genecards.org/cgi-bin/carddisp.pl?gene=TACC1</a>     |
| SRSF4   | Serine And Arginine Rich Splicing Factor 4                      | Protein Coding | 39 | GC01M029147 | 3.747962 | <a href="https://www.genecards.org/cgi-bin/carddisp.pl?gene=SRSF4">https://www.genecards.org/cgi-bin/carddisp.pl?gene=SRSF4</a>     |
| FEZF1   | FEZ Family Zinc Finger 1<br>RIC8 Guanine                        | Protein Coding | 40 | GC07M122301 | 3.735251 | <a href="https://www.genecards.org/cgi-bin/carddisp.pl?gene=FEZF1">https://www.genecards.org/cgi-bin/carddisp.pl?gene=FEZF1</a>     |
| RIC8A   | Nucleotide Exchange Factor A                                    | Protein Coding | 36 | GC11P000207 | 3.734514 | <a href="https://www.genecards.org/cgi-bin/carddisp.pl?gene=RIC8A">https://www.genecards.org/cgi-bin/carddisp.pl?gene=RIC8A</a>     |
| SPATA5  | Spermatogenesis Associated 5                                    | Protein Coding | 41 | GC04P122923 | 3.72644  | <a href="https://www.genecards.org/cgi-bin/carddisp.pl?gene=SPATA5">https://www.genecards.org/cgi-bin/carddisp.pl?gene=SPATA5</a>   |
| BCAR3   | BCAR3 Adaptor Protein, NSP Family Member                        | Protein Coding | 40 | GC01M093561 | 3.726127 | <a href="https://www.genecards.org/cgi-bin/carddisp.pl?gene=BCAR3">https://www.genecards.org/cgi-bin/carddisp.pl?gene=BCAR3</a>     |
| FAM3C   | FAM3 Metabolism Regulating Signaling Molecule C                 | Protein Coding | 40 | GC07M121349 | 3.722619 | <a href="https://www.genecards.org/cgi-bin/carddisp.pl?gene=FAM3C">https://www.genecards.org/cgi-bin/carddisp.pl?gene=FAM3C</a>     |
| AGR3    | Anterior Gradient 3, Protein Disulphide Isomerase Family Member | Protein Coding | 38 | GC07M016854 | 3.721906 | <a href="https://www.genecards.org/cgi-bin/carddisp.pl?gene=AGR3">https://www.genecards.org/cgi-bin/carddisp.pl?gene=AGR3</a>       |
| PIAS4   | Protein Inhibitor Of Activated STAT 4                           | Protein Coding | 43 | GC19P004007 | 3.720944 | <a href="https://www.genecards.org/cgi-bin/carddisp.pl?gene=PIAS4">https://www.genecards.org/cgi-bin/carddisp.pl?gene=PIAS4</a>     |
| ZFP36L1 | ZFP36 Ring Finger Protein Like 1                                | Protein Coding | 44 | GC14M068787 | 3.716752 | <a href="https://www.genecards.org/cgi-bin/carddisp.pl?gene=ZFP36L1">https://www.genecards.org/cgi-bin/carddisp.pl?gene=ZFP36L1</a> |
| KIF16B  | Kinesin Family Member 16B                                       | Protein Coding | 38 | GC20M016272 | 3.716726 | <a href="https://www.genecards.org/cgi-bin/carddisp.pl?gene=KIF16B">https://www.genecards.org/cgi-bin/carddisp.pl?gene=KIF16B</a>   |
| ANXA3   | Annexin A3                                                      | Protein Coding | 43 | GC04P078551 | 3.714436 | <a href="https://www.genecards.org/cgi-bin/carddisp.pl?gene=ANXA3">https://www.genecards.org/cgi-bin/carddisp.pl?gene=ANXA3</a>     |
| ZFP36L2 | ZFP36 Ring Finger Protein Like 2                                | Protein Coding | 38 | GC02M043184 | 3.714127 | <a href="https://www.genecards.org/cgi-bin/carddisp.pl?gene=ZFP36L2">https://www.genecards.org/cgi-bin/carddisp.pl?gene=ZFP36L2</a> |

|         |                                                        |                |    |             |          |                                                                                                                                     |
|---------|--------------------------------------------------------|----------------|----|-------------|----------|-------------------------------------------------------------------------------------------------------------------------------------|
| GABPA   | GA Binding Protein Transcription Factor Subunit Alpha  | Protein Coding | 41 | GC21P025734 | 3.711926 | <a href="https://www.genecards.org/cgi-bin/carddisp.pl?gene=GABPA">https://www.genecards.org/cgi-bin/carddisp.pl?gene=GABPA</a>     |
| PTGFR   | Prostaglandin F Receptor                               | Protein Coding | 45 | GC01P078303 | 3.709012 | <a href="https://www.genecards.org/cgi-bin/carddisp.pl?gene=PTGFR">https://www.genecards.org/cgi-bin/carddisp.pl?gene=PTGFR</a>     |
| TNFAIP6 | TNF Alpha Induced Protein 6                            | Protein Coding | 41 | GC02P151357 | 3.707534 | <a href="https://www.genecards.org/cgi-bin/carddisp.pl?gene=TNFAIP6">https://www.genecards.org/cgi-bin/carddisp.pl?gene=TNFAIP6</a> |
| KCNK2   | Potassium Two Pore Domain Channel Subfamily K Member 2 | Protein Coding | 40 | GC01P215005 | 3.706043 | <a href="https://www.genecards.org/cgi-bin/carddisp.pl?gene=KCNK2">https://www.genecards.org/cgi-bin/carddisp.pl?gene=KCNK2</a>     |
| IER3    | Immediate Early Response 3                             | Protein Coding | 38 | GC06M030743 | 3.703523 | <a href="https://www.genecards.org/cgi-bin/carddisp.pl?gene=IER3">https://www.genecards.org/cgi-bin/carddisp.pl?gene=IER3</a>       |
| RABL3   | RAB, Member Of RAS Oncogene Family Like 3              | Protein Coding | 34 | GC03M120686 | 3.700064 | <a href="https://www.genecards.org/cgi-bin/carddisp.pl?gene=RABL3">https://www.genecards.org/cgi-bin/carddisp.pl?gene=RABL3</a>     |
| RND3    | Rho Family GTPase 3                                    | Protein Coding | 43 | GC02M150468 | 3.699605 | <a href="https://www.genecards.org/cgi-bin/carddisp.pl?gene=RND3">https://www.genecards.org/cgi-bin/carddisp.pl?gene=RND3</a>       |
| ANAPC5  | Anaphase Promoting Complex Subunit 5                   | Protein Coding | 38 | GC12M121308 | 3.695754 | <a href="https://www.genecards.org/cgi-bin/carddisp.pl?gene=ANAPC5">https://www.genecards.org/cgi-bin/carddisp.pl?gene=ANAPC5</a>   |
| ADH5P4  | ADH5 Pseudogene 4                                      | Pseudogene     | 8  | GC06M065835 | 3.69552  | <a href="https://www.genecards.org/cgi-bin/carddisp.pl?gene=ADH5P4">https://www.genecards.org/cgi-bin/carddisp.pl?gene=ADH5P4</a>   |
| NRBP1   | Nuclear Receptor Binding Protein 1                     | Protein Coding | 40 | GC02P027427 | 3.686369 | <a href="https://www.genecards.org/cgi-bin/carddisp.pl?gene=NRBP1">https://www.genecards.org/cgi-bin/carddisp.pl?gene=NRBP1</a>     |
| BMP8B   | Bone Morphogenetic Protein 8b                          | Protein Coding | 39 | GC01M039757 | 3.684701 | <a href="https://www.genecards.org/cgi-bin/carddisp.pl?gene=BMP8B">https://www.genecards.org/cgi-bin/carddisp.pl?gene=BMP8B</a>     |
| DNAJC15 | DnaJ Heat Shock Protein Family (Hsp40) Member C15      | Protein Coding | 37 | GC13P043023 | 3.683096 | <a href="https://www.genecards.org/cgi-bin/carddisp.pl?gene=DNAJC15">https://www.genecards.org/cgi-bin/carddisp.pl?gene=DNAJC15</a> |
| RBBP7   | RB Binding Protein 7, Chromatin Remodeling Factor      | Protein Coding | 41 | GC0XM016839 | 3.682717 | <a href="https://www.genecards.org/cgi-bin/carddisp.pl?gene=RBBP7">https://www.genecards.org/cgi-bin/carddisp.pl?gene=RBBP7</a>     |
| RGPD2   | RANBP2 Like And GRIP Domain Containing 2               | Protein Coding | 30 | GC02M087755 | 3.680158 | <a href="https://www.genecards.org/cgi-bin/carddisp.pl?gene=RGPD2">https://www.genecards.org/cgi-bin/carddisp.pl?gene=RGPD2</a>     |
| ZDHHC13 | Zinc Finger DHHC-Type Palmitoyltransferase 13          | Protein Coding | 38 | GC11P019095 | 3.67967  | <a href="https://www.genecards.org/cgi-bin/carddisp.pl?gene=ZDHHC13">https://www.genecards.org/cgi-bin/carddisp.pl?gene=ZDHHC13</a> |
| VPS52   | VPS52 Subunit Of GARP Complex                          | Protein Coding | 36 | GC06M046975 | 3.678367 | <a href="https://www.genecards.org/cgi-bin/carddisp.pl?gene=VPS52">https://www.genecards.org/cgi-bin/carddisp.pl?gene=VPS52</a>     |



|         |                                                       |                |    |             |          |                                                                                                                                     |
|---------|-------------------------------------------------------|----------------|----|-------------|----------|-------------------------------------------------------------------------------------------------------------------------------------|
| GGT5    | Gamma-Glutamyltransferase 5                           | Protein Coding | 40 | GC22M024219 | 3.673661 | <a href="https://www.genecards.org/cgi-bin/carddisp.pl?gene=GGT5">https://www.genecards.org/cgi-bin/carddisp.pl?gene=GGT5</a>       |
| DDX17   | DEAD-Box Helicase 17                                  | Protein Coding | 41 | GC22M038483 | 3.672779 | <a href="https://www.genecards.org/cgi-bin/carddisp.pl?gene=DDX17">https://www.genecards.org/cgi-bin/carddisp.pl?gene=DDX17</a>     |
| DSCAML1 | DS Cell Adhesion Molecule Like 1                      | Protein Coding | 38 | GC11M117427 | 3.670866 | <a href="https://www.genecards.org/cgi-bin/carddisp.pl?gene=DSCAML1">https://www.genecards.org/cgi-bin/carddisp.pl?gene=DSCAML1</a> |
| MTF2    | Metal Response Element Binding Transcription Factor 2 | Protein Coding | 39 | GC01P093079 | 3.669576 | <a href="https://www.genecards.org/cgi-bin/carddisp.pl?gene=MTF2">https://www.genecards.org/cgi-bin/carddisp.pl?gene=MTF2</a>       |
| GAL3ST1 | Galactose-3-O-Sulfotransferase 1                      | Protein Coding | 37 | GC22M030554 | 3.666687 | <a href="https://www.genecards.org/cgi-bin/carddisp.pl?gene=GAL3ST1">https://www.genecards.org/cgi-bin/carddisp.pl?gene=GAL3ST1</a> |
| TEX36   | Testis Expressed 36                                   | Protein Coding | 29 | GC10M125576 | 3.665281 | <a href="https://www.genecards.org/cgi-bin/carddisp.pl?gene=TEX36">https://www.genecards.org/cgi-bin/carddisp.pl?gene=TEX36</a>     |
| TFAP2C  | Transcription Factor AP-2 Gamma                       | Protein Coding | 43 | GC20P056629 | 3.662132 | <a href="https://www.genecards.org/cgi-bin/carddisp.pl?gene=TFAP2C">https://www.genecards.org/cgi-bin/carddisp.pl?gene=TFAP2C</a>   |
| SNAP23  | Synaptosome Associated Protein 23                     | Protein Coding | 45 | GC15P042491 | 3.660439 | <a href="https://www.genecards.org/cgi-bin/carddisp.pl?gene=SNAP23">https://www.genecards.org/cgi-bin/carddisp.pl?gene=SNAP23</a>   |
| TMOD3   | Tropomodulin 3                                        | Protein Coding | 40 | GC15P051829 | 3.659048 | <a href="https://www.genecards.org/cgi-bin/carddisp.pl?gene=TMOD3">https://www.genecards.org/cgi-bin/carddisp.pl?gene=TMOD3</a>     |
| CARD6   | Caspase Recruitment Domain Family Member 6            | Protein Coding | 38 | GC05P040841 | 3.656702 | <a href="https://www.genecards.org/cgi-bin/carddisp.pl?gene=CARD6">https://www.genecards.org/cgi-bin/carddisp.pl?gene=CARD6</a>     |
| DGKA    | Diacylglycerol Kinase Alpha                           | Protein Coding | 45 | GC12P055927 | 3.654264 | <a href="https://www.genecards.org/cgi-bin/carddisp.pl?gene=DGKA">https://www.genecards.org/cgi-bin/carddisp.pl?gene=DGKA</a>       |
| DDX50   | DEXD-Box Helicase 50                                  | Protein Coding | 40 | GC10P068901 | 3.652528 | <a href="https://www.genecards.org/cgi-bin/carddisp.pl?gene=DDX50">https://www.genecards.org/cgi-bin/carddisp.pl?gene=DDX50</a>     |
| RBMX    | RNA Binding Motif Protein X-Linked                    | Protein Coding | 43 | GC0XM136848 | 3.652502 | <a href="https://www.genecards.org/cgi-bin/carddisp.pl?gene=RBMX">https://www.genecards.org/cgi-bin/carddisp.pl?gene=RBMX</a>       |
| TPD52L2 | TPD52 Like 2                                          | Protein Coding | 38 | GC20P063865 | 3.652063 | <a href="https://www.genecards.org/cgi-bin/carddisp.pl?gene=TPD52L2">https://www.genecards.org/cgi-bin/carddisp.pl?gene=TPD52L2</a> |
| LIMA1   | LIM Domain And Actin Binding 1                        | Protein Coding | 40 | GC12M050175 | 3.651401 | <a href="https://www.genecards.org/cgi-bin/carddisp.pl?gene=LIMA1">https://www.genecards.org/cgi-bin/carddisp.pl?gene=LIMA1</a>     |
| MIR217  | MicroRNA 217                                          | RNA Gene       | 18 | GC02M055982 | 3.64604  | <a href="https://www.genecards.org/cgi-bin/carddisp.pl?gene=MIR217">https://www.genecards.org/cgi-bin/carddisp.pl?gene=MIR217</a>   |
| PIM3    | Pim-3 Proto-Oncogene, Serine/Threonine Kinase         | Protein Coding | 40 | GC22P049960 | 3.643878 | <a href="https://www.genecards.org/cgi-bin/carddisp.pl?gene=PIM3">https://www.genecards.org/cgi-bin/carddisp.pl?gene=PIM3</a>       |
| IFITM2  | Induced Transmembrane Protein 2                       | Protein Coding | 37 | GC11P000300 | 3.6438   | <a href="https://www.genecards.org/cgi-bin/carddisp.pl?gene=IFITM2">https://www.genecards.org/cgi-bin/carddisp.pl?gene=IFITM2</a>   |
| TBC1D15 | TBC1 Domain Family Member 15                          | Protein Coding | 38 | GC12P071839 | 3.642407 | <a href="https://www.genecards.org/cgi-bin/carddisp.pl?gene=TBC1D15">https://www.genecards.org/cgi-bin/carddisp.pl?gene=TBC1D15</a> |

|              |                                                        |                   |    |             |          |                                                                                                                                               |
|--------------|--------------------------------------------------------|-------------------|----|-------------|----------|-----------------------------------------------------------------------------------------------------------------------------------------------|
| CTCFL        | CCCTC-Binding Factor Like                              | Protein Coding    | 40 | GC20M057495 | 3.640864 | <a href="https://www.genecards.org/cgi-bin/carddisp.pl?gene=CTCFL">https://www.genecards.org/cgi-bin/carddisp.pl?gene=CTCFL</a>               |
| CDC34        | Cell Division Cycle 34, Ubiquitin Conjugating Enzyme   | Protein Coding    | 48 | GC19P000532 | 3.640702 | <a href="https://www.genecards.org/cgi-bin/carddisp.pl?gene=CDC34">https://www.genecards.org/cgi-bin/carddisp.pl?gene=CDC34</a>               |
| CAPZB        | Capping Actin Protein Of Muscle Z-Line Subunit Beta    | Protein Coding    | 41 | GC01M019339 | 3.640276 | <a href="https://www.genecards.org/cgi-bin/carddisp.pl?gene=CAPZB">https://www.genecards.org/cgi-bin/carddisp.pl?gene=CAPZB</a>               |
| CMPK1        | Cytidine/Uridine Monophosphate Kinase 1                | Protein Coding    | 44 | GC01P047333 | 3.640109 | <a href="https://www.genecards.org/cgi-bin/carddisp.pl?gene=CMPK1">https://www.genecards.org/cgi-bin/carddisp.pl?gene=CMPK1</a>               |
| PPA1         | Inorganic Pyrophosphatase 1                            | Protein Coding    | 41 | GC10M070202 | 3.634335 | <a href="https://www.genecards.org/cgi-bin/carddisp.pl?gene=PPA1">https://www.genecards.org/cgi-bin/carddisp.pl?gene=PPA1</a>                 |
| LOC111365141 | NOS2 5' Regulatory Region                              | Biological Region | 2  | GC17P027800 | 3.630841 | <a href="https://www.genecards.org/cgi-bin/carddisp.pl?gene=LOC111365141">https://www.genecards.org/cgi-bin/carddisp.pl?gene=LOC111365141</a> |
| ATP2B4       | ATPase Plasma Membrane Ca <sup>2+</sup> Transporting 4 | Protein Coding    | 45 | GC01P203626 | 3.630209 | <a href="https://www.genecards.org/cgi-bin/carddisp.pl?gene=ATP2B4">https://www.genecards.org/cgi-bin/carddisp.pl?gene=ATP2B4</a>             |
| SLC9A8       | Solute Carrier Family 9 Member A8                      | Protein Coding    | 40 | GC20P049813 | 3.630065 | <a href="https://www.genecards.org/cgi-bin/carddisp.pl?gene=SLC9A8">https://www.genecards.org/cgi-bin/carddisp.pl?gene=SLC9A8</a>             |
| FAM171A1     | Family With Sequence Similarity 171 Member A1          | Protein Coding    | 33 | GC10M015254 | 3.627962 | <a href="https://www.genecards.org/cgi-bin/carddisp.pl?gene=FAM171A1">https://www.genecards.org/cgi-bin/carddisp.pl?gene=FAM171A1</a>         |
| SF3A1        | Splicing Factor 3a Subunit 1                           | Protein Coding    | 40 | GC22M030331 | 3.627717 | <a href="https://www.genecards.org/cgi-bin/carddisp.pl?gene=SF3A1">https://www.genecards.org/cgi-bin/carddisp.pl?gene=SF3A1</a>               |
| GLIS1        | GLIS Family Zinc Finger 1                              | Protein Coding    | 34 | GC01M053507 | 3.626914 | <a href="https://www.genecards.org/cgi-bin/carddisp.pl?gene=GLIS1">https://www.genecards.org/cgi-bin/carddisp.pl?gene=GLIS1</a>               |
| PLXNA1       | Plexin A1                                              | Protein Coding    | 44 | GC03P126988 | 3.624239 | <a href="https://www.genecards.org/cgi-bin/carddisp.pl?gene=PLXNA1">https://www.genecards.org/cgi-bin/carddisp.pl?gene=PLXNA1</a>             |
| DGKB         | Diacylglycerol Kinase Beta Vesicle                     | Protein Coding    | 46 | GC07M014145 | 3.616496 | <a href="https://www.genecards.org/cgi-bin/carddisp.pl?gene=DGKB">https://www.genecards.org/cgi-bin/carddisp.pl?gene=DGKB</a>                 |
| VAMP7        | Associated Membrane Protein 7                          | Protein Coding    | 43 | GC0XP155881 | 3.61413  | <a href="https://www.genecards.org/cgi-bin/carddisp.pl?gene=VAMP7">https://www.genecards.org/cgi-bin/carddisp.pl?gene=VAMP7</a>               |
| PTK6         | Protein Tyrosine Kinase 6                              | Protein Coding    | 48 | GC20M063528 | 3.601345 | <a href="https://www.genecards.org/cgi-bin/carddisp.pl?gene=PTK6">https://www.genecards.org/cgi-bin/carddisp.pl?gene=PTK6</a>                 |
| GSDMD        | Gasdermin D                                            | Protein Coding    | 40 | GC08P143553 | 3.599214 | <a href="https://www.genecards.org/cgi-bin/carddisp.pl?gene=GSDMD">https://www.genecards.org/cgi-bin/carddisp.pl?gene=GSDMD</a>               |
| IBTK         | Inhibitor Of Bruton Tyrosine Kinase                    | Protein Coding    | 40 | GC06M082169 | 3.597259 | <a href="https://www.genecards.org/cgi-bin/carddisp.pl?gene=IBTK">https://www.genecards.org/cgi-bin/carddisp.pl?gene=IBTK</a>                 |
| EFNA5        | Ephrin A5                                              | Protein Coding    | 44 | GC05M107376 | 3.596578 | <a href="https://www.genecards.org/cgi-bin/carddisp.pl?gene=EFNA5">https://www.genecards.org/cgi-bin/carddisp.pl?gene=EFNA5</a>               |
| TMEM108      | Transmembrane Protein 108                              | Protein Coding    | 36 | GC03P133038 | 3.59309  | <a href="https://www.genecards.org/cgi-bin/carddisp.pl?gene=TMEM108">https://www.genecards.org/cgi-bin/carddisp.pl?gene=TMEM108</a>           |

|               |                                                      |                |    |             |          |                                                                                                                                                 |
|---------------|------------------------------------------------------|----------------|----|-------------|----------|-------------------------------------------------------------------------------------------------------------------------------------------------|
| EIF3L         | Eukaryotic Translation Initiation Factor 3 Subunit L | Protein Coding | 39 | GC22P037848 | 3.589599 | <a href="https://www.genecards.org/cgi-bin/carddisp.pl?gene=EIF3L">https://www.genecards.org/cgi-bin/carddisp.pl?gene=EIF3L</a>                 |
| PRICKLE4      | Prickle Planar Cell Polarity Protein 4               | Protein Coding | 36 | GC06P041780 | 3.58647  | <a href="https://www.genecards.org/cgi-bin/carddisp.pl?gene=PRICKLE4">https://www.genecards.org/cgi-bin/carddisp.pl?gene=PRICKLE4</a>           |
| AMY1A         | Amylase Alpha 1A                                     | Protein Coding | 35 | GC01P103651 | 3.584145 | <a href="https://www.genecards.org/cgi-bin/carddisp.pl?gene=AMY1A">https://www.genecards.org/cgi-bin/carddisp.pl?gene=AMY1A</a>                 |
| CIDEA         | Cell Death Inducing DFFA Like Effector A             | Protein Coding | 41 | GC18P012254 | 3.584048 | <a href="https://www.genecards.org/cgi-bin/carddisp.pl?gene=CIDEA">https://www.genecards.org/cgi-bin/carddisp.pl?gene=CIDEA</a>                 |
| CHST2         | Carbohydrate Sulfotransferase 2                      | Protein Coding | 38 | GC03P143119 | 3.583963 | <a href="https://www.genecards.org/cgi-bin/carddisp.pl?gene=CHST2">https://www.genecards.org/cgi-bin/carddisp.pl?gene=CHST2</a>                 |
| TKTL1         | Transketolase Like 1                                 | Protein Coding | 42 | GC0XP154295 | 3.578979 | <a href="https://www.genecards.org/cgi-bin/carddisp.pl?gene=TKTL1">https://www.genecards.org/cgi-bin/carddisp.pl?gene=TKTL1</a>                 |
| BIRC6         | Baculoviral IAP Repeat Containing 6                  | Protein Coding | 43 | GC02P032357 | 3.575604 | <a href="https://www.genecards.org/cgi-bin/carddisp.pl?gene=BIRC6">https://www.genecards.org/cgi-bin/carddisp.pl?gene=BIRC6</a>                 |
| UBE2J1        | Ubiquitin Conjugating Enzyme E2 J1                   | Protein Coding | 41 | GC06M089326 | 3.575598 | <a href="https://www.genecards.org/cgi-bin/carddisp.pl?gene=UBE2J1">https://www.genecards.org/cgi-bin/carddisp.pl?gene=UBE2J1</a>               |
| TAX1BP3       | Tax1 Binding Protein 3                               | Protein Coding | 38 | GC17M003666 | 3.573484 | <a href="https://www.genecards.org/cgi-bin/carddisp.pl?gene=TAX1BP3">https://www.genecards.org/cgi-bin/carddisp.pl?gene=TAX1BP3</a>             |
| PHF5A         | PHD Finger Protein 5A                                | Protein Coding | 37 | GC22M041459 | 3.568998 | <a href="https://www.genecards.org/cgi-bin/carddisp.pl?gene=PHF5A">https://www.genecards.org/cgi-bin/carddisp.pl?gene=PHF5A</a>                 |
| ABI1          | Abl Interactor 1                                     | Protein Coding | 43 | GC10M026746 | 3.567733 | <a href="https://www.genecards.org/cgi-bin/carddisp.pl?gene=ABI1">https://www.genecards.org/cgi-bin/carddisp.pl?gene=ABI1</a>                   |
| BASP1         | Brain Abundant Membrane Attached Signal Protein 1    | Protein Coding | 37 | GC05P017065 | 3.55845  | <a href="https://www.genecards.org/cgi-bin/carddisp.pl?gene=BASP1">https://www.genecards.org/cgi-bin/carddisp.pl?gene=BASP1</a>                 |
| ANKRD30A      | Ankyrin Repeat Domain 30A                            | Protein Coding | 36 | GC10P037134 | 3.557813 | <a href="https://www.genecards.org/cgi-bin/carddisp.pl?gene=ANKRD30A">https://www.genecards.org/cgi-bin/carddisp.pl?gene=ANKRD30A</a>           |
| PKD1P6-NPIPP1 | PKD1P6-NPIPP1 Readthrough                            | Pseudogene     | 6  | GC16M015262 | 3.557201 | <a href="https://www.genecards.org/cgi-bin/carddisp.pl?gene=PKD1P6-NPIPP1">https://www.genecards.org/cgi-bin/carddisp.pl?gene=PKD1P6-NPIPP1</a> |
| ZFP90         | ZFP90 Zinc Finger Protein                            | Protein Coding | 36 | GC16P068530 | 3.54882  | <a href="https://www.genecards.org/cgi-bin/carddisp.pl?gene=ZFP90">https://www.genecards.org/cgi-bin/carddisp.pl?gene=ZFP90</a>                 |
| OSBP          | Oxysterol Binding Protein                            | Protein Coding | 40 | GC11M069113 | 3.544468 | <a href="https://www.genecards.org/cgi-bin/carddisp.pl?gene=OSBP">https://www.genecards.org/cgi-bin/carddisp.pl?gene=OSBP</a>                   |
| NLRP2         | NLR Family Pyrin Domain Containing 2                 | Protein Coding | 42 | GC19P054953 | 3.54446  | <a href="https://www.genecards.org/cgi-bin/carddisp.pl?gene=NLRP2">https://www.genecards.org/cgi-bin/carddisp.pl?gene=NLRP2</a>                 |
| FGF12         | Fibroblast Growth Factor 12                          | Protein Coding | 44 | GC03M192139 | 3.541733 | <a href="https://www.genecards.org/cgi-bin/carddisp.pl?gene=FGF12">https://www.genecards.org/cgi-bin/carddisp.pl?gene=FGF12</a>                 |
| IL36A         | Interleukin 36 Alpha                                 | Protein Coding | 37 | GC02P113005 | 3.540015 | <a href="https://www.genecards.org/cgi-bin/carddisp.pl?gene=IL36A">https://www.genecards.org/cgi-bin/carddisp.pl?gene=IL36A</a>                 |
| FGF13         | Fibroblast Growth Factor 13                          | Protein Coding | 43 | GC0XM138615 | 3.526624 | <a href="https://www.genecards.org/cgi-bin/carddisp.pl?gene=FGF13">https://www.genecards.org/cgi-bin/carddisp.pl?gene=FGF13</a>                 |

|         |                                              |                |    |             |          |                                                                                                                                     |
|---------|----------------------------------------------|----------------|----|-------------|----------|-------------------------------------------------------------------------------------------------------------------------------------|
| BTN2A1  | Butyrophilin Subfamily 2 Member A1           | Protein Coding | 38 | GC06P026457 | 3.524532 | <a href="https://www.genecards.org/cgi-bin/carddisp.pl?gene=BTN2A1">https://www.genecards.org/cgi-bin/carddisp.pl?gene=BTN2A1</a>   |
| HDLBP   | High Density Lipoprotein Binding Protein     | Protein Coding | 41 | GC02M241227 | 3.524413 | <a href="https://www.genecards.org/cgi-bin/carddisp.pl?gene=HDLBP">https://www.genecards.org/cgi-bin/carddisp.pl?gene=HDLBP</a>     |
| ABCC12  | ATP Binding Cassette Subfamily C Member 12   | Protein Coding | 40 | GC16M048081 | 3.523999 | <a href="https://www.genecards.org/cgi-bin/carddisp.pl?gene=ABCC12">https://www.genecards.org/cgi-bin/carddisp.pl?gene=ABCC12</a>   |
| ARF4    | ADP Ribosylation Factor 4                    | Protein Coding | 44 | GC03M057559 | 3.521961 | <a href="https://www.genecards.org/cgi-bin/carddisp.pl?gene=ARF4">https://www.genecards.org/cgi-bin/carddisp.pl?gene=ARF4</a>       |
| CYB5B   | Cytochrome B5 Type B Ubiquitin               | Protein Coding | 42 | GC16P069424 | 3.520857 | <a href="https://www.genecards.org/cgi-bin/carddisp.pl?gene=CYB5B">https://www.genecards.org/cgi-bin/carddisp.pl?gene=CYB5B</a>     |
| UBR4    | Protein Ligase E3 Component N-Recognin 4     | Protein Coding | 39 | GC01M019074 | 3.520182 | <a href="https://www.genecards.org/cgi-bin/carddisp.pl?gene=UBR4">https://www.genecards.org/cgi-bin/carddisp.pl?gene=UBR4</a>       |
| ITGA11  | Integrin Subunit Alpha 11                    | Protein Coding | 43 | GC15M068296 | 3.519771 | <a href="https://www.genecards.org/cgi-bin/carddisp.pl?gene=ITGA11">https://www.genecards.org/cgi-bin/carddisp.pl?gene=ITGA11</a>   |
| NCOA5   | Nuclear Receptor Coactivator 5               | Protein Coding | 37 | GC20M046060 | 3.519367 | <a href="https://www.genecards.org/cgi-bin/carddisp.pl?gene=NCOA5">https://www.genecards.org/cgi-bin/carddisp.pl?gene=NCOA5</a>     |
| CENPT   | Centromere Protein T                         | Protein Coding | 38 | GC16M067828 | 3.516394 | <a href="https://www.genecards.org/cgi-bin/carddisp.pl?gene=CENPT">https://www.genecards.org/cgi-bin/carddisp.pl?gene=CENPT</a>     |
| MTPN    | Myotrophin                                   | Protein Coding | 36 | GC07M135926 | 3.515093 | <a href="https://www.genecards.org/cgi-bin/carddisp.pl?gene=MTPN">https://www.genecards.org/cgi-bin/carddisp.pl?gene=MTPN</a>       |
| GNG2    | G Protein Subunit Gamma 2                    | Protein Coding | 44 | GC14P051826 | 3.512416 | <a href="https://www.genecards.org/cgi-bin/carddisp.pl?gene=GNG2">https://www.genecards.org/cgi-bin/carddisp.pl?gene=GNG2</a>       |
| RSPO3   | R-Spondin 3                                  | Protein Coding | 38 | GC06P127118 | 3.509968 | <a href="https://www.genecards.org/cgi-bin/carddisp.pl?gene=RSPO3">https://www.genecards.org/cgi-bin/carddisp.pl?gene=RSPO3</a>     |
| RERG    | RAS Like Estrogen Regulated Growth Inhibitor | Protein Coding | 38 | GC12M015760 | 3.508299 | <a href="https://www.genecards.org/cgi-bin/carddisp.pl?gene=RERG">https://www.genecards.org/cgi-bin/carddisp.pl?gene=RERG</a>       |
| DUSP3   | Dual Specificity Phosphatase 3               | Protein Coding | 45 | GC17M043766 | 3.50618  | <a href="https://www.genecards.org/cgi-bin/carddisp.pl?gene=DUSP3">https://www.genecards.org/cgi-bin/carddisp.pl?gene=DUSP3</a>     |
| SLC26A6 | Solute Carrier Family 26 Member 6            | Protein Coding | 39 | GC03M048625 | 3.499781 | <a href="https://www.genecards.org/cgi-bin/carddisp.pl?gene=SLC26A6">https://www.genecards.org/cgi-bin/carddisp.pl?gene=SLC26A6</a> |
| CALML4  | Calmodulin Like 4                            | Protein Coding | 34 | GC15M068190 | 3.499511 | <a href="https://www.genecards.org/cgi-bin/carddisp.pl?gene=CALML4">https://www.genecards.org/cgi-bin/carddisp.pl?gene=CALML4</a>   |
| USP4    | Ubiquitin Specific Peptidase 4               | Protein Coding | 43 | GC03M049277 | 3.497966 | <a href="https://www.genecards.org/cgi-bin/carddisp.pl?gene=USP4">https://www.genecards.org/cgi-bin/carddisp.pl?gene=USP4</a>       |
| C1QTNF3 | C1q And TNF Related 3 Protein                | Protein Coding | 38 | GC05M034017 | 3.497666 | <a href="https://www.genecards.org/cgi-bin/carddisp.pl?gene=C1QTNF3">https://www.genecards.org/cgi-bin/carddisp.pl?gene=C1QTNF3</a> |
| PPP2R5C | Phosphatase 2 Regulatory Subunit B'Gamma     | Protein Coding | 45 | GC14P106421 | 3.497166 | <a href="https://www.genecards.org/cgi-bin/carddisp.pl?gene=PPP2R5C">https://www.genecards.org/cgi-bin/carddisp.pl?gene=PPP2R5C</a> |

|         |                                                      |                |    |             |          |                                                                                                                                     |
|---------|------------------------------------------------------|----------------|----|-------------|----------|-------------------------------------------------------------------------------------------------------------------------------------|
| TRAPPC4 | Trafficking Protein Particle Complex Subunit 4       | Protein Coding | 41 | GC11P119018 | 3.495054 | <a href="https://www.genecards.org/cgi-bin/carddisp.pl?gene=TRAPPC4">https://www.genecards.org/cgi-bin/carddisp.pl?gene=TRAPPC4</a> |
| SSR1    | Signal Sequence Receptor Subunit 1                   | Protein Coding | 41 | GC06M007268 | 3.494134 | <a href="https://www.genecards.org/cgi-bin/carddisp.pl?gene=SSR1">https://www.genecards.org/cgi-bin/carddisp.pl?gene=SSR1</a>       |
| SNHG16  | Small Nucleolar RNA Host Gene 16                     | RNA Gene       | 18 | GC17P076767 | 3.49216  | <a href="https://www.genecards.org/cgi-bin/carddisp.pl?gene=SNHG16">https://www.genecards.org/cgi-bin/carddisp.pl?gene=SNHG16</a>   |
| UBXN1   | UBX Domain Protein 1                                 | Protein Coding | 36 | GC11M069259 | 3.491509 | <a href="https://www.genecards.org/cgi-bin/carddisp.pl?gene=UBXN1">https://www.genecards.org/cgi-bin/carddisp.pl?gene=UBXN1</a>     |
| MT1A    | Metallothionein 1A                                   | Protein Coding | 38 | GC16P056638 | 3.482947 | <a href="https://www.genecards.org/cgi-bin/carddisp.pl?gene=MT1A">https://www.genecards.org/cgi-bin/carddisp.pl?gene=MT1A</a>       |
| PSMB6   | Proteasome 20S Subunit Beta 6                        | Protein Coding | 43 | GC17P004796 | 3.481221 | <a href="https://www.genecards.org/cgi-bin/carddisp.pl?gene=PSMB6">https://www.genecards.org/cgi-bin/carddisp.pl?gene=PSMB6</a>     |
| NCBP1   | Nuclear Cap Binding Protein Subunit 1                | Protein Coding | 39 | GC09P097633 | 3.480496 | <a href="https://www.genecards.org/cgi-bin/carddisp.pl?gene=NCBP1">https://www.genecards.org/cgi-bin/carddisp.pl?gene=NCBP1</a>     |
| ILF2    | Interleukin Enhancer Binding Factor 2                | Protein Coding | 40 | GC01M153661 | 3.477452 | <a href="https://www.genecards.org/cgi-bin/carddisp.pl?gene=ILF2">https://www.genecards.org/cgi-bin/carddisp.pl?gene=ILF2</a>       |
| VIRMA   | Vir Like M6A Methyltransferase Associated            | Protein Coding | 27 | GC08M094488 | 3.473283 | <a href="https://www.genecards.org/cgi-bin/carddisp.pl?gene=VIRMA">https://www.genecards.org/cgi-bin/carddisp.pl?gene=VIRMA</a>     |
| TFEC    | Transcription Factor EC                              | Protein Coding | 40 | GC07M115935 | 3.471693 | <a href="https://www.genecards.org/cgi-bin/carddisp.pl?gene=TFEC">https://www.genecards.org/cgi-bin/carddisp.pl?gene=TFEC</a>       |
| ADAT3   | Adenosine Deaminase TRNA Specific 3                  | Protein Coding | 35 | GC19P001906 | 3.469581 | <a href="https://www.genecards.org/cgi-bin/carddisp.pl?gene=ADAT3">https://www.genecards.org/cgi-bin/carddisp.pl?gene=ADAT3</a>     |
| SGIP1   | SH3GL Interacting Endocytic Adaptor 1                | Protein Coding | 35 | GC01P066533 | 3.46732  | <a href="https://www.genecards.org/cgi-bin/carddisp.pl?gene=SGIP1">https://www.genecards.org/cgi-bin/carddisp.pl?gene=SGIP1</a>     |
| EIF3E   | Eukaryotic Translation Initiation Factor 3 Subunit E | Protein Coding | 39 | GC08M108163 | 3.466106 | <a href="https://www.genecards.org/cgi-bin/carddisp.pl?gene=EIF3E">https://www.genecards.org/cgi-bin/carddisp.pl?gene=EIF3E</a>     |
| VPS54   | VPS54 Subunit Of GARP Complex                        | Protein Coding | 37 | GC02M063892 | 3.465575 | <a href="https://www.genecards.org/cgi-bin/carddisp.pl?gene=VPS54">https://www.genecards.org/cgi-bin/carddisp.pl?gene=VPS54</a>     |
| DUSP13  | Dual Specificity Phosphatase 13                      | Protein Coding | 40 | GC10M075094 | 3.465465 | <a href="https://www.genecards.org/cgi-bin/carddisp.pl?gene=DUSP13">https://www.genecards.org/cgi-bin/carddisp.pl?gene=DUSP13</a>   |
| MPIG6B  | Megakaryocyte And Platelet Inhibitory Receptor G6b   | Protein Coding | 32 | GC06P056499 | 3.464864 | <a href="https://www.genecards.org/cgi-bin/carddisp.pl?gene=MPIG6B">https://www.genecards.org/cgi-bin/carddisp.pl?gene=MPIG6B</a>   |

|           |                                                    |                |    |             |          |                                                                                                                                         |
|-----------|----------------------------------------------------|----------------|----|-------------|----------|-----------------------------------------------------------------------------------------------------------------------------------------|
| ARPC2     | Actin Related Protein 2/3 Complex Subunit 2        | Protein Coding | 43 | GC02P218217 | 3.462652 | <a href="https://www.genecards.org/cgi-bin/carddisp.pl?gene=ARPC2">https://www.genecards.org/cgi-bin/carddisp.pl?gene=ARPC2</a>         |
| RCN1      | Reticulocalbin 1                                   | Protein Coding | 40 | GC11P032090 | 3.462087 | <a href="https://www.genecards.org/cgi-bin/carddisp.pl?gene=RCN1">https://www.genecards.org/cgi-bin/carddisp.pl?gene=RCN1</a>           |
| SAP30BP   | SAP30 Binding Protein                              | Protein Coding | 38 | GC17P075667 | 3.4575   | <a href="https://www.genecards.org/cgi-bin/carddisp.pl?gene=SAP30BP">https://www.genecards.org/cgi-bin/carddisp.pl?gene=SAP30BP</a>     |
| SLC25A18  | Solute Carrier Family 25 Member 18                 | Protein Coding | 40 | GC22P017689 | 3.454096 | <a href="https://www.genecards.org/cgi-bin/carddisp.pl?gene=SLC25A18">https://www.genecards.org/cgi-bin/carddisp.pl?gene=SLC25A18</a>   |
| RYBP      | RING1 And YY1 Binding Protein                      | Protein Coding | 41 | GC03M072371 | 3.453499 | <a href="https://www.genecards.org/cgi-bin/carddisp.pl?gene=RYBP">https://www.genecards.org/cgi-bin/carddisp.pl?gene=RYBP</a>           |
| MATK      | Megakaryocyte -Associated Tyrosine Kinase          | Protein Coding | 46 | GC19M003777 | 3.453198 | <a href="https://www.genecards.org/cgi-bin/carddisp.pl?gene=MATK">https://www.genecards.org/cgi-bin/carddisp.pl?gene=MATK</a>           |
| USP48     | Ubiquitin Specific Peptidase 48                    | Protein Coding | 40 | GC01M021678 | 3.444248 | <a href="https://www.genecards.org/cgi-bin/carddisp.pl?gene=USP48">https://www.genecards.org/cgi-bin/carddisp.pl?gene=USP48</a>         |
| LINC02694 | Long Intergenic Non-Protein Coding RNA 2694        | RNA Gene       | 23 | GC15P038622 | 3.443242 | <a href="https://www.genecards.org/cgi-bin/carddisp.pl?gene=LINC02694">https://www.genecards.org/cgi-bin/carddisp.pl?gene=LINC02694</a> |
| WDR20     | WD Repeat Domain 20                                | Protein Coding | 35 | GC14P106033 | 3.442783 | <a href="https://www.genecards.org/cgi-bin/carddisp.pl?gene=WDR20">https://www.genecards.org/cgi-bin/carddisp.pl?gene=WDR20</a>         |
| CIDEB     | Cell Death Inducing DFFA Like Effector B           | Protein Coding | 37 | GC14M024305 | 3.441411 | <a href="https://www.genecards.org/cgi-bin/carddisp.pl?gene=CIDEB">https://www.genecards.org/cgi-bin/carddisp.pl?gene=CIDEB</a>         |
| LOC643339 | Uncharacterized LOC643339                          | RNA Gene       | 9  | GC12M093005 | 3.432151 | <a href="https://www.genecards.org/cgi-bin/carddisp.pl?gene=LOC643339">https://www.genecards.org/cgi-bin/carddisp.pl?gene=LOC643339</a> |
| HSD17B7   | Hydroxysteroid 17-Beta Dehydrogenase 7             | Protein Coding | 44 | GC01P162790 | 3.429786 | <a href="https://www.genecards.org/cgi-bin/carddisp.pl?gene=HSD17B7">https://www.genecards.org/cgi-bin/carddisp.pl?gene=HSD17B7</a>     |
| VSIG4     | V-Set And Immunoglobulin Domain Containing 4       | Protein Coding | 37 | GC0XM066021 | 3.427186 | <a href="https://www.genecards.org/cgi-bin/carddisp.pl?gene=VSIG4">https://www.genecards.org/cgi-bin/carddisp.pl?gene=VSIG4</a>         |
| ZNF629    | Zinc Finger Protein 629                            | Protein Coding | 31 | GC16M031317 | 3.426744 | <a href="https://www.genecards.org/cgi-bin/carddisp.pl?gene=ZNF629">https://www.genecards.org/cgi-bin/carddisp.pl?gene=ZNF629</a>       |
| SMC4      | Structural Maintenance Of Chromosomes 4            | Protein Coding | 40 | GC03P160399 | 3.426485 | <a href="https://www.genecards.org/cgi-bin/carddisp.pl?gene=SMC4">https://www.genecards.org/cgi-bin/carddisp.pl?gene=SMC4</a>           |
| TIMM22    | Translocase Of Inner Mitochondrial Membrane 22     | Protein Coding | 37 | GC17P000997 | 3.425393 | <a href="https://www.genecards.org/cgi-bin/carddisp.pl?gene=TIMM22">https://www.genecards.org/cgi-bin/carddisp.pl?gene=TIMM22</a>       |
| UBR2      | Ubiquitin Protein Ligase E3 Component N-Recognin 2 | Protein Coding | 40 | GC06P055398 | 3.423468 | <a href="https://www.genecards.org/cgi-bin/carddisp.pl?gene=UBR2">https://www.genecards.org/cgi-bin/carddisp.pl?gene=UBR2</a>           |

|          |                                                        |                |    |             |          |                                                                                                                                       |
|----------|--------------------------------------------------------|----------------|----|-------------|----------|---------------------------------------------------------------------------------------------------------------------------------------|
| RNU6-53P | RNA, U6 Small Nuclear 53, Pseudogene                   | Pseudogene     | 8  | GC13M028703 | 3.423291 | <a href="https://www.genecards.org/cgi-bin/carddisp.pl?gene=RNU6-53P">https://www.genecards.org/cgi-bin/carddisp.pl?gene=RNU6-53P</a> |
| SLC24A3  | Solute Carrier Family 24 Member 3                      | Protein Coding | 40 | GC20P019212 | 3.42275  | <a href="https://www.genecards.org/cgi-bin/carddisp.pl?gene=SLC24A3">https://www.genecards.org/cgi-bin/carddisp.pl?gene=SLC24A3</a>   |
| LASP1    | LIM And SH3 Protein 1                                  | Protein Coding | 43 | GC17P038869 | 3.422331 | <a href="https://www.genecards.org/cgi-bin/carddisp.pl?gene=LASP1">https://www.genecards.org/cgi-bin/carddisp.pl?gene=LASP1</a>       |
| JRKL     | JRK Like                                               | Protein Coding | 33 | GC11P096389 | 3.421736 | <a href="https://www.genecards.org/cgi-bin/carddisp.pl?gene=JRKL">https://www.genecards.org/cgi-bin/carddisp.pl?gene=JRKL</a>         |
| PTDSS2   | Phosphatidylerine Synthase 2                           | Protein Coding | 37 | GC11P000448 | 3.421223 | <a href="https://www.genecards.org/cgi-bin/carddisp.pl?gene=PTDSS2">https://www.genecards.org/cgi-bin/carddisp.pl?gene=PTDSS2</a>     |
| TIAM1    | TIAM Rac1 Associated GEF 1                             | Protein Coding | 45 | GC21M031118 | 3.420755 | <a href="https://www.genecards.org/cgi-bin/carddisp.pl?gene=TIAM1">https://www.genecards.org/cgi-bin/carddisp.pl?gene=TIAM1</a>       |
| SCGB2A2  | Secretoglobin Family 2A Member 2                       | Protein Coding | 37 | GC11P062269 | 3.417606 | <a href="https://www.genecards.org/cgi-bin/carddisp.pl?gene=SCGB2A2">https://www.genecards.org/cgi-bin/carddisp.pl?gene=SCGB2A2</a>   |
| MAPKAPK3 | MAPK Activated Protein Kinase 3                        | Protein Coding | 50 | GC03P050611 | 3.413744 | <a href="https://www.genecards.org/cgi-bin/carddisp.pl?gene=MAPKAPK3">https://www.genecards.org/cgi-bin/carddisp.pl?gene=MAPKAPK3</a> |
| HIGD1A   | HIG1 Hypoxia Inducible Domain Family Member 1A         | Protein Coding | 38 | GC03M042782 | 3.410537 | <a href="https://www.genecards.org/cgi-bin/carddisp.pl?gene=HIGD1A">https://www.genecards.org/cgi-bin/carddisp.pl?gene=HIGD1A</a>     |
| GPR161   | G Protein-Coupled Receptor 161                         | Protein Coding | 41 | GC01M168080 | 3.408909 | <a href="https://www.genecards.org/cgi-bin/carddisp.pl?gene=GPR161">https://www.genecards.org/cgi-bin/carddisp.pl?gene=GPR161</a>     |
| NDUFA4L2 | NDUFA4 Mitochondrial Complex Associated Like 2         | Protein Coding | 37 | GC12M057234 | 3.407495 | <a href="https://www.genecards.org/cgi-bin/carddisp.pl?gene=NDUFA4L2">https://www.genecards.org/cgi-bin/carddisp.pl?gene=NDUFA4L2</a> |
| HSD17B14 | Hydroxysteroid 17-Beta Dehydrogenase 14                | Protein Coding | 38 | GC19M048813 | 3.405724 | <a href="https://www.genecards.org/cgi-bin/carddisp.pl?gene=HSD17B14">https://www.genecards.org/cgi-bin/carddisp.pl?gene=HSD17B14</a> |
| APPBP2   | Amyloid Beta Precursor Protein Binding Protein 2       | Protein Coding | 37 | GC17M060443 | 3.401546 | <a href="https://www.genecards.org/cgi-bin/carddisp.pl?gene=APPBP2">https://www.genecards.org/cgi-bin/carddisp.pl?gene=APPBP2</a>     |
| MYBBP1A  | MYB Binding Protein 1a                                 | Protein Coding | 40 | GC17M004538 | 3.400179 | <a href="https://www.genecards.org/cgi-bin/carddisp.pl?gene=MYBBP1A">https://www.genecards.org/cgi-bin/carddisp.pl?gene=MYBBP1A</a>   |
| XPO4     | Exportin 4                                             | Protein Coding | 38 | GC13M020777 | 3.394728 | <a href="https://www.genecards.org/cgi-bin/carddisp.pl?gene=XPO4">https://www.genecards.org/cgi-bin/carddisp.pl?gene=XPO4</a>         |
| CAPZA1   | Capping Actin Protein Of Muscle Z-Line Subunit Alpha 1 | Protein Coding | 42 | GC01P112619 | 3.394477 | <a href="https://www.genecards.org/cgi-bin/carddisp.pl?gene=CAPZA1">https://www.genecards.org/cgi-bin/carddisp.pl?gene=CAPZA1</a>     |
| LGSN     | Lengsin, Lens Protein With Glutamine Synthetase Domain | Protein Coding | 34 | GC06M063275 | 3.39157  | <a href="https://www.genecards.org/cgi-bin/carddisp.pl?gene=LGSN">https://www.genecards.org/cgi-bin/carddisp.pl?gene=LGSN</a>         |

|                 |                                                      |                |    |             |          |                                                                                                                                                     |
|-----------------|------------------------------------------------------|----------------|----|-------------|----------|-----------------------------------------------------------------------------------------------------------------------------------------------------|
| EIF3J           | Eukaryotic Translation Initiation Factor 3 Subunit J | Protein Coding | 40 | GC15P044537 | 3.389582 | <a href="https://www.genecards.org/cgi-bin/carddisp.pl?gene=EIF3J">https://www.genecards.org/cgi-bin/carddisp.pl?gene=EIF3J</a>                     |
| ENSG00000266919 |                                                      | RNA Gene       | 5  | GC17M031119 | 3.388794 | <a href="https://www.genecards.org/cgi-bin/carddisp.pl?gene=ENSG00000266919">https://www.genecards.org/cgi-bin/carddisp.pl?gene=ENSG00000266919</a> |
| HIPK3           | Homeodomain Interacting Protein Kinase 3             | Protein Coding | 43 | GC11P033278 | 3.386807 | <a href="https://www.genecards.org/cgi-bin/carddisp.pl?gene=HIPK3">https://www.genecards.org/cgi-bin/carddisp.pl?gene=HIPK3</a>                     |
| EIF3K           | Eukaryotic Translation Initiation Factor 3 Subunit K | Protein Coding | 39 | GC19P038619 | 3.385266 | <a href="https://www.genecards.org/cgi-bin/carddisp.pl?gene=EIF3K">https://www.genecards.org/cgi-bin/carddisp.pl?gene=EIF3K</a>                     |
| ZFYVE9          | Zinc Finger FYVE-Type Containing 9                   | Protein Coding | 43 | GC01P052142 | 3.384112 | <a href="https://www.genecards.org/cgi-bin/carddisp.pl?gene=ZFYVE9">https://www.genecards.org/cgi-bin/carddisp.pl?gene=ZFYVE9</a>                   |
| TLCD4           | TLC Domain Containing 4                              | Protein Coding | 27 | GC01P095092 | 3.381307 | <a href="https://www.genecards.org/cgi-bin/carddisp.pl?gene=TLCD4">https://www.genecards.org/cgi-bin/carddisp.pl?gene=TLCD4</a>                     |
| ECT2            | Epithelial Cell Transforming 2                       | Protein Coding | 41 | GC03P172750 | 3.38014  | <a href="https://www.genecards.org/cgi-bin/carddisp.pl?gene=ECT2">https://www.genecards.org/cgi-bin/carddisp.pl?gene=ECT2</a>                       |
| MAD2L1BP        | MAD2L1 Binding Protein                               | Protein Coding | 36 | GC06P043629 | 3.378428 | <a href="https://www.genecards.org/cgi-bin/carddisp.pl?gene=MAD2L1BP">https://www.genecards.org/cgi-bin/carddisp.pl?gene=MAD2L1BP</a>               |
| MAPK6           | Mitogen-Activated Protein Kinase 6                   | Protein Coding | 45 | GC15P051952 | 3.3756   | <a href="https://www.genecards.org/cgi-bin/carddisp.pl?gene=MAPK6">https://www.genecards.org/cgi-bin/carddisp.pl?gene=MAPK6</a>                     |
| CCDC141         | Coiled-Coil Domain Containing 141                    | Protein Coding | 36 | GC02M178829 | 3.375553 | <a href="https://www.genecards.org/cgi-bin/carddisp.pl?gene=CCDC141">https://www.genecards.org/cgi-bin/carddisp.pl?gene=CCDC141</a>                 |
| CKAP4           | Cytoskeleton Associated Protein 4                    | Protein Coding | 38 | GC12M106237 | 3.37349  | <a href="https://www.genecards.org/cgi-bin/carddisp.pl?gene=CKAP4">https://www.genecards.org/cgi-bin/carddisp.pl?gene=CKAP4</a>                     |
| AHCYL1          | Adenosylhomocysteinase Like 1                        | Protein Coding | 44 | GC01P109984 | 3.372233 | <a href="https://www.genecards.org/cgi-bin/carddisp.pl?gene=AHCYL1">https://www.genecards.org/cgi-bin/carddisp.pl?gene=AHCYL1</a>                   |
| ZBTB7A          | Zinc Finger And BTB Domain Containing 7A             | Protein Coding | 37 | GC19M004045 | 3.370528 | <a href="https://www.genecards.org/cgi-bin/carddisp.pl?gene=ZBTB7A">https://www.genecards.org/cgi-bin/carddisp.pl?gene=ZBTB7A</a>                   |
| MYO18B          | Myosin XVIIIIB                                       | Protein Coding | 39 | GC22P025742 | 3.368923 | <a href="https://www.genecards.org/cgi-bin/carddisp.pl?gene=MYO18B">https://www.genecards.org/cgi-bin/carddisp.pl?gene=MYO18B</a>                   |
| ADAMTS9-AS2     | ADAMTS9 Antisense RNA 2                              | RNA Gene       | 16 | GC03P064671 | 3.368214 | <a href="https://www.genecards.org/cgi-bin/carddisp.pl?gene=ADAMTS9-AS2">https://www.genecards.org/cgi-bin/carddisp.pl?gene=ADAMTS9-AS2</a>         |
| RPL32           | Ribosomal Protein L32                                | Protein Coding | 40 | GC03M012834 | 3.36744  | <a href="https://www.genecards.org/cgi-bin/carddisp.pl?gene=RPL32">https://www.genecards.org/cgi-bin/carddisp.pl?gene=RPL32</a>                     |
| LINC00460       | Long Intergenic Non-Protein Coding RNA 460           | RNA Gene       | 16 | GC13P106376 | 3.364998 | <a href="https://www.genecards.org/cgi-bin/carddisp.pl?gene=LINC00460">https://www.genecards.org/cgi-bin/carddisp.pl?gene=LINC00460</a>             |



|           |                                                       |                |    |             |          |                                                                                                                                         |
|-----------|-------------------------------------------------------|----------------|----|-------------|----------|-----------------------------------------------------------------------------------------------------------------------------------------|
| PSG2      | Pregnancy Specific Beta-1-Glycoprotein 2              | Protein Coding | 34 | GC19M043064 | 3.364372 | <a href="https://www.genecards.org/cgi-bin/carddisp.pl?gene=PSG2">https://www.genecards.org/cgi-bin/carddisp.pl?gene=PSG2</a>           |
| POC1A     | POC1 Centriolar Protein A Interactor Of Little        | Protein Coding | 38 | GC03M052109 | 3.354208 | <a href="https://www.genecards.org/cgi-bin/carddisp.pl?gene=POC1A">https://www.genecards.org/cgi-bin/carddisp.pl?gene=POC1A</a>         |
| ICE2      | Elongation Complex ELL Subunit 2                      | Protein Coding | 33 | GC15M060419 | 3.352345 | <a href="https://www.genecards.org/cgi-bin/carddisp.pl?gene=ICE2">https://www.genecards.org/cgi-bin/carddisp.pl?gene=ICE2</a>           |
| CCNK      | Cyclin K                                              | Protein Coding | 43 | GC14P099483 | 3.352274 | <a href="https://www.genecards.org/cgi-bin/carddisp.pl?gene=CCNK">https://www.genecards.org/cgi-bin/carddisp.pl?gene=CCNK</a>           |
| KIF13B    | Kinesin Family Member 13B                             | Protein Coding | 41 | GC08M029067 | 3.350354 | <a href="https://www.genecards.org/cgi-bin/carddisp.pl?gene=KIF13B">https://www.genecards.org/cgi-bin/carddisp.pl?gene=KIF13B</a>       |
| PLXNA4    | Plexin A4                                             | Protein Coding | 40 | GC07M132123 | 3.346508 | <a href="https://www.genecards.org/cgi-bin/carddisp.pl?gene=PLXNA4">https://www.genecards.org/cgi-bin/carddisp.pl?gene=PLXNA4</a>       |
| RFX3      | Regulatory Factor X3 Origin                           | Protein Coding | 40 | GC09M003214 | 3.345685 | <a href="https://www.genecards.org/cgi-bin/carddisp.pl?gene=RFX3">https://www.genecards.org/cgi-bin/carddisp.pl?gene=RFX3</a>           |
| ORC5      | Recognition Complex Subunit 5                         | Protein Coding | 37 | GC07M104126 | 3.339668 | <a href="https://www.genecards.org/cgi-bin/carddisp.pl?gene=ORC5">https://www.genecards.org/cgi-bin/carddisp.pl?gene=ORC5</a>           |
| FGF6      | Fibroblast Growth Factor 6                            | Protein Coding | 40 | GC12M004429 | 3.3385   | <a href="https://www.genecards.org/cgi-bin/carddisp.pl?gene=FGF6">https://www.genecards.org/cgi-bin/carddisp.pl?gene=FGF6</a>           |
| OLIG1     | Oligodendrocyte Transcription Factor 1                | Protein Coding | 38 | GC21P033070 | 3.337327 | <a href="https://www.genecards.org/cgi-bin/carddisp.pl?gene=OLIG1">https://www.genecards.org/cgi-bin/carddisp.pl?gene=OLIG1</a>         |
| LINC01405 | Long Intergenic Non-Protein Coding RNA 1405           | RNA Gene       | 15 | GC12P110936 | 3.332382 | <a href="https://www.genecards.org/cgi-bin/carddisp.pl?gene=LINC01405">https://www.genecards.org/cgi-bin/carddisp.pl?gene=LINC01405</a> |
| SND1      | Staphylococcal Nuclease And Tudor Domain Containing 1 | Protein Coding | 43 | GC07P127652 | 3.329912 | <a href="https://www.genecards.org/cgi-bin/carddisp.pl?gene=SND1">https://www.genecards.org/cgi-bin/carddisp.pl?gene=SND1</a>           |
| LRRFIP2   | LRR Binding FLII Interacting Protein 2                | Protein Coding | 38 | GC03M037052 | 3.320521 | <a href="https://www.genecards.org/cgi-bin/carddisp.pl?gene=LRRFIP2">https://www.genecards.org/cgi-bin/carddisp.pl?gene=LRRFIP2</a>     |
| SVIL-AS1  | SVIL Antisense RNA 1                                  | RNA Gene       | 13 | GC10P029410 | 3.319946 | <a href="https://www.genecards.org/cgi-bin/carddisp.pl?gene=SVIL-AS1">https://www.genecards.org/cgi-bin/carddisp.pl?gene=SVIL-AS1</a>   |
| MIR345    | MicroRNA 345                                          | RNA Gene       | 19 | GC14P100307 | 3.316504 | <a href="https://www.genecards.org/cgi-bin/carddisp.pl?gene=MIR345">https://www.genecards.org/cgi-bin/carddisp.pl?gene=MIR345</a>       |
| CLDND1    | Claudin Domain Containing 1                           | Protein Coding | 37 | GC03M098497 | 3.315968 | <a href="https://www.genecards.org/cgi-bin/carddisp.pl?gene=CLDND1">https://www.genecards.org/cgi-bin/carddisp.pl?gene=CLDND1</a>       |
| IMPA1     | Inositol Monophosphatase 1 RAB37,                     | Protein Coding | 49 | GC08M081656 | 3.315798 | <a href="https://www.genecards.org/cgi-bin/carddisp.pl?gene=IMPA1">https://www.genecards.org/cgi-bin/carddisp.pl?gene=IMPA1</a>         |
| RAB37     | Member RAS Oncogene Family                            | Protein Coding | 39 | GC17P074671 | 3.313342 | <a href="https://www.genecards.org/cgi-bin/carddisp.pl?gene=RAB37">https://www.genecards.org/cgi-bin/carddisp.pl?gene=RAB37</a>         |

|          |                                                                      |                |    |             |          |                                                                                                                                       |
|----------|----------------------------------------------------------------------|----------------|----|-------------|----------|---------------------------------------------------------------------------------------------------------------------------------------|
| ICAM5    | Intercellular Adhesion Molecule 5                                    | Protein Coding | 40 | GC19P010289 | 3.311417 | <a href="https://www.genecards.org/cgi-bin/carddisp.pl?gene=ICAM5">https://www.genecards.org/cgi-bin/carddisp.pl?gene=ICAM5</a>       |
| MRTFB    | Myocardin Related Transcription Factor B                             | Protein Coding | 30 | GC16P014071 | 3.309253 | <a href="https://www.genecards.org/cgi-bin/carddisp.pl?gene=MRTFB">https://www.genecards.org/cgi-bin/carddisp.pl?gene=MRTFB</a>       |
| BMP10    | Bone Morphogenetic Protein 10                                        | Protein Coding | 39 | GC02M068865 | 3.306949 | <a href="https://www.genecards.org/cgi-bin/carddisp.pl?gene=BMP10">https://www.genecards.org/cgi-bin/carddisp.pl?gene=BMP10</a>       |
| RBM6     | RNA Binding Motif Protein 6                                          | Protein Coding | 37 | GC03P049940 | 3.302695 | <a href="https://www.genecards.org/cgi-bin/carddisp.pl?gene=RBM6">https://www.genecards.org/cgi-bin/carddisp.pl?gene=RBM6</a>         |
| MSBP2    | Minisatellite Binding Protein 2                                      | Protein Coding | 4  | GC00U990214 | 3.301336 | <a href="https://www.genecards.org/cgi-bin/carddisp.pl?gene=MSBP2">https://www.genecards.org/cgi-bin/carddisp.pl?gene=MSBP2</a>       |
| MLEC     | Malectin                                                             | Protein Coding | 37 | GC12P120687 | 3.301245 | <a href="https://www.genecards.org/cgi-bin/carddisp.pl?gene=MLEC">https://www.genecards.org/cgi-bin/carddisp.pl?gene=MLEC</a>         |
| RNH1     | Ribonuclease/Angiogenin Inhibitor 1                                  | Protein Coding | 38 | GC11M001079 | 3.296893 | <a href="https://www.genecards.org/cgi-bin/carddisp.pl?gene=RNH1">https://www.genecards.org/cgi-bin/carddisp.pl?gene=RNH1</a>         |
| SMOC2    | SPARC Related Modular Calcium Binding 2                              | Protein Coding | 42 | GC06P168441 | 3.296794 | <a href="https://www.genecards.org/cgi-bin/carddisp.pl?gene=SMOC2">https://www.genecards.org/cgi-bin/carddisp.pl?gene=SMOC2</a>       |
| PLEKHA8  | Pleckstrin Homology Domain Containing A8                             | Protein Coding | 37 | GC07P030027 | 3.296571 | <a href="https://www.genecards.org/cgi-bin/carddisp.pl?gene=PLEKHA8">https://www.genecards.org/cgi-bin/carddisp.pl?gene=PLEKHA8</a>   |
| SLC16A10 | Solute Carrier Family 16 Member 10                                   | Protein Coding | 40 | GC06P111087 | 3.293602 | <a href="https://www.genecards.org/cgi-bin/carddisp.pl?gene=SLC16A10">https://www.genecards.org/cgi-bin/carddisp.pl?gene=SLC16A10</a> |
| SUB1     | SUB1 Regulator Of Transcription                                      | Protein Coding | 39 | GC05P032540 | 3.287555 | <a href="https://www.genecards.org/cgi-bin/carddisp.pl?gene=SUB1">https://www.genecards.org/cgi-bin/carddisp.pl?gene=SUB1</a>         |
| ACYP2    | Acylphosphatase 2                                                    | Protein Coding | 40 | GC02P053970 | 3.286894 | <a href="https://www.genecards.org/cgi-bin/carddisp.pl?gene=ACYP2">https://www.genecards.org/cgi-bin/carddisp.pl?gene=ACYP2</a>       |
| LATS2    | Large Tumor Suppressor Kinase 2                                      | Protein Coding | 46 | GC13M020973 | 3.286833 | <a href="https://www.genecards.org/cgi-bin/carddisp.pl?gene=LATS2">https://www.genecards.org/cgi-bin/carddisp.pl?gene=LATS2</a>       |
| PTGER1   | Prostaglandin E Receptor 1                                           | Protein Coding | 41 | GC19M014444 | 3.286324 | <a href="https://www.genecards.org/cgi-bin/carddisp.pl?gene=PTGER1">https://www.genecards.org/cgi-bin/carddisp.pl?gene=PTGER1</a>     |
| ZMYND8   | Zinc Finger MYND-Type Containing 8                                   | Protein Coding | 40 | GC20M047209 | 3.285129 | <a href="https://www.genecards.org/cgi-bin/carddisp.pl?gene=ZMYND8">https://www.genecards.org/cgi-bin/carddisp.pl?gene=ZMYND8</a>     |
| MAGI1    | Membrane Associated Guanylate Kinase, WW And PDZ Domain Containing 1 | Protein Coding | 41 | GC03M065330 | 3.282785 | <a href="https://www.genecards.org/cgi-bin/carddisp.pl?gene=MAGI1">https://www.genecards.org/cgi-bin/carddisp.pl?gene=MAGI1</a>       |
| P2RY1    | Purinergic Receptor P2Y1                                             | Protein Coding | 47 | GC03P152835 | 3.282743 | <a href="https://www.genecards.org/cgi-bin/carddisp.pl?gene=P2RY1">https://www.genecards.org/cgi-bin/carddisp.pl?gene=P2RY1</a>       |
| MTA3     | Metastasis Associated 1 Family Member 3                              | Protein Coding | 43 | GC02P042494 | 3.279561 | <a href="https://www.genecards.org/cgi-bin/carddisp.pl?gene=MTA3">https://www.genecards.org/cgi-bin/carddisp.pl?gene=MTA3</a>         |

|         |                                                                          |                |    |             |          |                                                                                                                                     |
|---------|--------------------------------------------------------------------------|----------------|----|-------------|----------|-------------------------------------------------------------------------------------------------------------------------------------|
| GNL3    | G Protein Nucleolar 3 Rho Guanine                                        | Protein Coding | 41 | GC03P052681 | 3.279166 | <a href="https://www.genecards.org/cgi-bin/carddisp.pl?gene=GNL3">https://www.genecards.org/cgi-bin/carddisp.pl?gene=GNL3</a>       |
| ARHGEF7 | Nucleotide Exchange Factor 7                                             | Protein Coding | 44 | GC13P111114 | 3.274893 | <a href="https://www.genecards.org/cgi-bin/carddisp.pl?gene=ARHGEF7">https://www.genecards.org/cgi-bin/carddisp.pl?gene=ARHGEF7</a> |
| PRPF38B | Pre-mRNA Processing Factor 38B                                           | Protein Coding | 33 | GC01P108692 | 3.273608 | <a href="https://www.genecards.org/cgi-bin/carddisp.pl?gene=PRPF38B">https://www.genecards.org/cgi-bin/carddisp.pl?gene=PRPF38B</a> |
| TAX1BP1 | Tax1 Binding Protein 1                                                   | Protein Coding | 41 | GC07P027739 | 3.272031 | <a href="https://www.genecards.org/cgi-bin/carddisp.pl?gene=TAX1BP1">https://www.genecards.org/cgi-bin/carddisp.pl?gene=TAX1BP1</a> |
| CEACAM7 | CEA Cell Adhesion Molecule 7                                             | Protein Coding | 38 | GC19M041673 | 3.269249 | <a href="https://www.genecards.org/cgi-bin/carddisp.pl?gene=CEACAM7">https://www.genecards.org/cgi-bin/carddisp.pl?gene=CEACAM7</a> |
| JMJD6   | Jumonji Domain Containing 6, Arginine Demethylase And Lysine Hydroxylase | Protein Coding | 43 | GC17M076718 | 3.268786 | <a href="https://www.genecards.org/cgi-bin/carddisp.pl?gene=JMJD6">https://www.genecards.org/cgi-bin/carddisp.pl?gene=JMJD6</a>     |
| XCL1    | X-C Motif Chemokine Ligand 1                                             | Protein Coding | 38 | GC01P168576 | 3.263575 | <a href="https://www.genecards.org/cgi-bin/carddisp.pl?gene=XCL1">https://www.genecards.org/cgi-bin/carddisp.pl?gene=XCL1</a>       |
| FOXN3   | Forkhead Box N3                                                          | Protein Coding | 39 | GC14M095787 | 3.257763 | <a href="https://www.genecards.org/cgi-bin/carddisp.pl?gene=FOXN3">https://www.genecards.org/cgi-bin/carddisp.pl?gene=FOXN3</a>     |
| XRN1    | 5'-3' Exoribonuclease 1                                                  | Protein Coding | 36 | GC03M142306 | 3.257639 | <a href="https://www.genecards.org/cgi-bin/carddisp.pl?gene=XRN1">https://www.genecards.org/cgi-bin/carddisp.pl?gene=XRN1</a>       |
| HEATR3  | HEAT Repeat Containing 3                                                 | Protein Coding | 31 | GC16P050065 | 3.256466 | <a href="https://www.genecards.org/cgi-bin/carddisp.pl?gene=HEATR3">https://www.genecards.org/cgi-bin/carddisp.pl?gene=HEATR3</a>   |
| RANBP9  | RAN Binding Protein 9                                                    | Protein Coding | 42 | GC06M013621 | 3.254754 | <a href="https://www.genecards.org/cgi-bin/carddisp.pl?gene=RANBP9">https://www.genecards.org/cgi-bin/carddisp.pl?gene=RANBP9</a>   |
| NTAN1   | N-Terminal Asparagine Amidase                                            | Protein Coding | 38 | GC16M015037 | 3.254645 | <a href="https://www.genecards.org/cgi-bin/carddisp.pl?gene=NTAN1">https://www.genecards.org/cgi-bin/carddisp.pl?gene=NTAN1</a>     |
| SESN3   | Sestrin 3                                                                | Protein Coding | 40 | GC11M095166 | 3.249538 | <a href="https://www.genecards.org/cgi-bin/carddisp.pl?gene=SESN3">https://www.genecards.org/cgi-bin/carddisp.pl?gene=SESN3</a>     |
| RLN2    | Relaxin 2                                                                | Protein Coding | 37 | GC09M005306 | 3.248283 | <a href="https://www.genecards.org/cgi-bin/carddisp.pl?gene=RLN2">https://www.genecards.org/cgi-bin/carddisp.pl?gene=RLN2</a>       |
| RGL1    | Ral Guanine Nucleotide Dissociation Stimulator Like 1                    | Protein Coding | 40 | GC01P183636 | 3.247843 | <a href="https://www.genecards.org/cgi-bin/carddisp.pl?gene=RGL1">https://www.genecards.org/cgi-bin/carddisp.pl?gene=RGL1</a>       |
| S100A2  | S100 Calcium Binding Protein A2                                          | Protein Coding | 41 | GC01M153561 | 3.242202 | <a href="https://www.genecards.org/cgi-bin/carddisp.pl?gene=S100A2">https://www.genecards.org/cgi-bin/carddisp.pl?gene=S100A2</a>   |
| PANK3   | Pantothenate Kinase 3                                                    | Protein Coding | 40 | GC05M168549 | 3.240339 | <a href="https://www.genecards.org/cgi-bin/carddisp.pl?gene=PANK3">https://www.genecards.org/cgi-bin/carddisp.pl?gene=PANK3</a>     |
| TNPO1   | Transportin 1                                                            | Protein Coding | 41 | GC05P072816 | 3.236463 | <a href="https://www.genecards.org/cgi-bin/carddisp.pl?gene=TNPO1">https://www.genecards.org/cgi-bin/carddisp.pl?gene=TNPO1</a>     |
| STK16   | Serine/Threonine Kinase 16                                               | Protein Coding | 41 | GC02P219248 | 3.236006 | <a href="https://www.genecards.org/cgi-bin/carddisp.pl?gene=STK16">https://www.genecards.org/cgi-bin/carddisp.pl?gene=STK16</a>     |
| CHD9    | Chromodomain Helicase DNA Binding Protein 9                              | Protein Coding | 38 | GC16P053041 | 3.233136 | <a href="https://www.genecards.org/cgi-bin/carddisp.pl?gene=CHD9">https://www.genecards.org/cgi-bin/carddisp.pl?gene=CHD9</a>       |

|               |                                                     |                |    |             |          |                                                                                                                                                 |
|---------------|-----------------------------------------------------|----------------|----|-------------|----------|-------------------------------------------------------------------------------------------------------------------------------------------------|
| GSTT2         | Glutathione S-Transferase Theta 2 (Gene/Pseudogene) | Protein Coding | 36 | GC22P023980 | 3.232046 | <a href="https://www.genecards.org/cgi-bin/carddisp.pl?gene=GSTT2">https://www.genecards.org/cgi-bin/carddisp.pl?gene=GSTT2</a>                 |
| GAR1          | GAR1 Ribonucleoprotein                              | Protein Coding | 37 | GC04P109815 | 3.223464 | <a href="https://www.genecards.org/cgi-bin/carddisp.pl?gene=GAR1">https://www.genecards.org/cgi-bin/carddisp.pl?gene=GAR1</a>                   |
| ITGA9         | Integrin Subunit Alpha 9                            | Protein Coding | 44 | GC03P037468 | 3.222739 | <a href="https://www.genecards.org/cgi-bin/carddisp.pl?gene=ITGA9">https://www.genecards.org/cgi-bin/carddisp.pl?gene=ITGA9</a>                 |
| USP10         | Ubiquitin Specific Peptidase 10                     | Protein Coding | 44 | GC16P084734 | 3.22244  | <a href="https://www.genecards.org/cgi-bin/carddisp.pl?gene=USP10">https://www.genecards.org/cgi-bin/carddisp.pl?gene=USP10</a>                 |
| SAFB2         | Scaffold Attachment Factor B2                       | Protein Coding | 37 | GC19M005587 | 3.219259 | <a href="https://www.genecards.org/cgi-bin/carddisp.pl?gene=SAFB2">https://www.genecards.org/cgi-bin/carddisp.pl?gene=SAFB2</a>                 |
| H3C2          | H3 Clustered Histone 2                              | Protein Coding | 31 | GC06M026032 | 3.216128 | <a href="https://www.genecards.org/cgi-bin/carddisp.pl?gene=H3C2">https://www.genecards.org/cgi-bin/carddisp.pl?gene=H3C2</a>                   |
| WASF3         | WASP Family Member 3                                | Protein Coding | 41 | GC13P026557 | 3.214986 | <a href="https://www.genecards.org/cgi-bin/carddisp.pl?gene=WASF3">https://www.genecards.org/cgi-bin/carddisp.pl?gene=WASF3</a>                 |
| VAMP4         | Vesicle Associated Membrane Protein 4               | Protein Coding | 43 | GC01M171700 | 3.209022 | <a href="https://www.genecards.org/cgi-bin/carddisp.pl?gene=VAMP4">https://www.genecards.org/cgi-bin/carddisp.pl?gene=VAMP4</a>                 |
| GJD3          | Gap Junction Protein Delta 3                        | Protein Coding | 33 | GC17M040360 | 3.208241 | <a href="https://www.genecards.org/cgi-bin/carddisp.pl?gene=GJD3">https://www.genecards.org/cgi-bin/carddisp.pl?gene=GJD3</a>                   |
| ELP2          | Elongator Acetyltransferase Complex Subunit 2       | Protein Coding | 38 | GC18P036129 | 3.206686 | <a href="https://www.genecards.org/cgi-bin/carddisp.pl?gene=ELP2">https://www.genecards.org/cgi-bin/carddisp.pl?gene=ELP2</a>                   |
| TRMT44        | TRNA Methyltransferase 44 Homolog                   | Protein Coding | 32 | GC04P008439 | 3.204755 | <a href="https://www.genecards.org/cgi-bin/carddisp.pl?gene=TRMT44">https://www.genecards.org/cgi-bin/carddisp.pl?gene=TRMT44</a>               |
| FAM3B         | FAM3 Metabolism Regulating Signaling Molecule B     | Protein Coding | 39 | GC21P041304 | 3.203745 | <a href="https://www.genecards.org/cgi-bin/carddisp.pl?gene=FAM3B">https://www.genecards.org/cgi-bin/carddisp.pl?gene=FAM3B</a>                 |
| SLC9A4        | Solute Carrier Family 9 Member A4                   | Protein Coding | 36 | GC02P102456 | 3.202937 | <a href="https://www.genecards.org/cgi-bin/carddisp.pl?gene=SLC9A4">https://www.genecards.org/cgi-bin/carddisp.pl?gene=SLC9A4</a>               |
| FBXW11        | F-Box And WD Repeat Domain Containing 11            | Protein Coding | 45 | GC05M171861 | 3.19717  | <a href="https://www.genecards.org/cgi-bin/carddisp.pl?gene=FBXW11">https://www.genecards.org/cgi-bin/carddisp.pl?gene=FBXW11</a>               |
| HSALNG0013825 |                                                     | RNA Gene       | 1  | GC02P027507 | 3.196733 | <a href="https://www.genecards.org/cgi-bin/carddisp.pl?gene=HSALNG0013825">https://www.genecards.org/cgi-bin/carddisp.pl?gene=HSALNG0013825</a> |
| SNRNP40       | Small Nuclear Ribonucleoprotein U5 Subunit 40       | Protein Coding | 37 | GC01M031259 | 3.196248 | <a href="https://www.genecards.org/cgi-bin/carddisp.pl?gene=SNRNP40">https://www.genecards.org/cgi-bin/carddisp.pl?gene=SNRNP40</a>             |
| ZDHHC20       | Zinc Finger DHHC-Type Palmitoyltransferase 20       | Protein Coding | 37 | GC13M021372 | 3.194844 | <a href="https://www.genecards.org/cgi-bin/carddisp.pl?gene=ZDHHC20">https://www.genecards.org/cgi-bin/carddisp.pl?gene=ZDHHC20</a>             |

|              |                                                        |                |    |             |          |                                                                                                                                               |
|--------------|--------------------------------------------------------|----------------|----|-------------|----------|-----------------------------------------------------------------------------------------------------------------------------------------------|
| CCDC26       | CCDC26 Long Non-Coding RNA                             | RNA Gene       | 26 | GC08M128925 | 3.185689 | <a href="https://www.genecards.org/cgi-bin/carddisp.pl?gene=CCDC26">https://www.genecards.org/cgi-bin/carddisp.pl?gene=CCDC26</a>             |
| MED4         | Mediator Complex Subunit 4                             | Protein Coding | 38 | GC13M048053 | 3.184414 | <a href="https://www.genecards.org/cgi-bin/carddisp.pl?gene=MED4">https://www.genecards.org/cgi-bin/carddisp.pl?gene=MED4</a>                 |
| ALX1         | ALX Homeobox 1                                         | Protein Coding | 40 | GC12P085279 | 3.178168 | <a href="https://www.genecards.org/cgi-bin/carddisp.pl?gene=ALX1">https://www.genecards.org/cgi-bin/carddisp.pl?gene=ALX1</a>                 |
| ASRGL1       | Asparaginase And Isoaspartyl Peptidase 1               | Protein Coding | 43 | GC11P062337 | 3.173931 | <a href="https://www.genecards.org/cgi-bin/carddisp.pl?gene=ASRGL1">https://www.genecards.org/cgi-bin/carddisp.pl?gene=ASRGL1</a>             |
| SRRM2        | Serine/Arginine Repetitive Matrix 2                    | Protein Coding | 34 | GC16P005607 | 3.173657 | <a href="https://www.genecards.org/cgi-bin/carddisp.pl?gene=SRRM2">https://www.genecards.org/cgi-bin/carddisp.pl?gene=SRRM2</a>               |
| LOC101929710 | Uncharacterized LOC101929710                           | RNA Gene       | 11 | GC05P095962 | 3.171996 | <a href="https://www.genecards.org/cgi-bin/carddisp.pl?gene=LOC101929710">https://www.genecards.org/cgi-bin/carddisp.pl?gene=LOC101929710</a> |
| PLPP7        | Phospholipid Phosphatase 7 (Inactive)                  | Protein Coding | 28 | GC09P131290 | 3.164884 | <a href="https://www.genecards.org/cgi-bin/carddisp.pl?gene=PLPP7">https://www.genecards.org/cgi-bin/carddisp.pl?gene=PLPP7</a>               |
| POLM         | DNA Polymerase Mu                                      | Protein Coding | 40 | GC07M044143 | 3.164086 | <a href="https://www.genecards.org/cgi-bin/carddisp.pl?gene=POLM">https://www.genecards.org/cgi-bin/carddisp.pl?gene=POLM</a>                 |
| COX7B2       | Cytochrome C Oxidase Subunit 7B2                       | Protein Coding | 32 | GC04M046734 | 3.158653 | <a href="https://www.genecards.org/cgi-bin/carddisp.pl?gene=COX7B2">https://www.genecards.org/cgi-bin/carddisp.pl?gene=COX7B2</a>             |
| COTL1        | Coactosin Like F-Actin Binding Protein 1               | Protein Coding | 41 | GC16M084566 | 3.15034  | <a href="https://www.genecards.org/cgi-bin/carddisp.pl?gene=COTL1">https://www.genecards.org/cgi-bin/carddisp.pl?gene=COTL1</a>               |
| BZW1         | Basic Leucine Zipper And W2 Domains 1                  | Protein Coding | 36 | GC02P200810 | 3.149478 | <a href="https://www.genecards.org/cgi-bin/carddisp.pl?gene=BZW1">https://www.genecards.org/cgi-bin/carddisp.pl?gene=BZW1</a>                 |
| TUSC1        | Tumor Suppressor Candidate 1                           | Protein Coding | 30 | GC09M025668 | 3.146367 | <a href="https://www.genecards.org/cgi-bin/carddisp.pl?gene=TUSC1">https://www.genecards.org/cgi-bin/carddisp.pl?gene=TUSC1</a>               |
| WSPAR        | WNT Signaling Pathway Activating Non-Coding RNA        | RNA Gene       | 11 | GC05P133914 | 3.146203 | <a href="https://www.genecards.org/cgi-bin/carddisp.pl?gene=WSPAR">https://www.genecards.org/cgi-bin/carddisp.pl?gene=WSPAR</a>               |
| SLC39A7      | Solute Carrier Family 39 Member 7                      | Protein Coding | 41 | GC06P033200 | 3.13961  | <a href="https://www.genecards.org/cgi-bin/carddisp.pl?gene=SLC39A7">https://www.genecards.org/cgi-bin/carddisp.pl?gene=SLC39A7</a>           |
| ERMN         | Ermin                                                  | Protein Coding | 36 | GC02M157318 | 3.136434 | <a href="https://www.genecards.org/cgi-bin/carddisp.pl?gene=ERMN">https://www.genecards.org/cgi-bin/carddisp.pl?gene=ERMN</a>                 |
| SPDEF        | SAM Pointed Domain Containing ETS Transcription Factor | Protein Coding | 40 | GC06M047018 | 3.135393 | <a href="https://www.genecards.org/cgi-bin/carddisp.pl?gene=SPDEF">https://www.genecards.org/cgi-bin/carddisp.pl?gene=SPDEF</a>               |
| CCL28        | C-C Motif Chemokine Ligand 28                          | Protein Coding | 41 | GC05M043356 | 3.135077 | <a href="https://www.genecards.org/cgi-bin/carddisp.pl?gene=CCL28">https://www.genecards.org/cgi-bin/carddisp.pl?gene=CCL28</a>               |
| DDX27        | DEAD-Box Helicase 27                                   | Protein Coding | 36 | GC20P049219 | 3.134715 | <a href="https://www.genecards.org/cgi-bin/carddisp.pl?gene=DDX27">https://www.genecards.org/cgi-bin/carddisp.pl?gene=DDX27</a>               |

|           |                                                                   |                |    |             |          |                                                                                                                                         |
|-----------|-------------------------------------------------------------------|----------------|----|-------------|----------|-----------------------------------------------------------------------------------------------------------------------------------------|
| PRMT2     | Protein Arginine Methyltransferase 2                              | Protein Coding | 42 | GC21P046635 | 3.130123 | <a href="https://www.genecards.org/cgi-bin/carddisp.pl?gene=PRMT2">https://www.genecards.org/cgi-bin/carddisp.pl?gene=PRMT2</a>         |
| MYL6B     | Myosin Light Chain 6B                                             | Protein Coding | 40 | GC12P056388 | 3.127315 | <a href="https://www.genecards.org/cgi-bin/carddisp.pl?gene=MYL6B">https://www.genecards.org/cgi-bin/carddisp.pl?gene=MYL6B</a>         |
| RGS10     | Regulator Of G Protein Signaling 10                               | Protein Coding | 44 | GC10M119499 | 3.124254 | <a href="https://www.genecards.org/cgi-bin/carddisp.pl?gene=RGS10">https://www.genecards.org/cgi-bin/carddisp.pl?gene=RGS10</a>         |
| DIRC3     | Disrupted In Renal Carcinoma 3                                    | RNA Gene       | 22 | GC02M217284 | 3.123611 | <a href="https://www.genecards.org/cgi-bin/carddisp.pl?gene=DIRC3">https://www.genecards.org/cgi-bin/carddisp.pl?gene=DIRC3</a>         |
| CERS6     | Ceramide Synthase 6                                               | Protein Coding | 38 | GC02P168455 | 3.123132 | <a href="https://www.genecards.org/cgi-bin/carddisp.pl?gene=CERS6">https://www.genecards.org/cgi-bin/carddisp.pl?gene=CERS6</a>         |
| YES1      | YES Proto-Oncogene 1, Src Family Tyrosine Kinase                  | Protein Coding | 49 | GC18M000721 | 3.119767 | <a href="https://www.genecards.org/cgi-bin/carddisp.pl?gene=YES1">https://www.genecards.org/cgi-bin/carddisp.pl?gene=YES1</a>           |
| LINC00917 | Long Intergenic Non-Protein Coding RNA 917                        | RNA Gene       | 15 | GC16M086366 | 3.117719 | <a href="https://www.genecards.org/cgi-bin/carddisp.pl?gene=LINC00917">https://www.genecards.org/cgi-bin/carddisp.pl?gene=LINC00917</a> |
| TAMM41    | TAM41 Mitochondrial Translocator Assembly And Maintenance Homolog | Protein Coding | 33 | GC03M011721 | 3.115762 | <a href="https://www.genecards.org/cgi-bin/carddisp.pl?gene=TAMM41">https://www.genecards.org/cgi-bin/carddisp.pl?gene=TAMM41</a>       |
| NASP      | Nuclear Autoantigenic Sperm Protein                               | Protein Coding | 37 | GC01P045583 | 3.11498  | <a href="https://www.genecards.org/cgi-bin/carddisp.pl?gene=NASP">https://www.genecards.org/cgi-bin/carddisp.pl?gene=NASP</a>           |
| ZNF569    | Zinc Finger Protein 569                                           | Protein Coding | 34 | GC19M046714 | 3.113239 | <a href="https://www.genecards.org/cgi-bin/carddisp.pl?gene=ZNF569">https://www.genecards.org/cgi-bin/carddisp.pl?gene=ZNF569</a>       |
| ARHGAP8   | Rho GTPase Activating Protein 8                                   | Protein Coding | 34 | GC22P044752 | 3.110983 | <a href="https://www.genecards.org/cgi-bin/carddisp.pl?gene=ARHGAP8">https://www.genecards.org/cgi-bin/carddisp.pl?gene=ARHGAP8</a>     |
| CLTCL1    | Clathrin Heavy Chain Like 1                                       | Protein Coding | 41 | GC22M019180 | 3.110639 | <a href="https://www.genecards.org/cgi-bin/carddisp.pl?gene=CLTCL1">https://www.genecards.org/cgi-bin/carddisp.pl?gene=CLTCL1</a>       |
| ST18      | ST18 C2H2C-Type Zinc Finger Transcription Factor                  | Protein Coding | 38 | GC08M052110 | 3.109979 | <a href="https://www.genecards.org/cgi-bin/carddisp.pl?gene=ST18">https://www.genecards.org/cgi-bin/carddisp.pl?gene=ST18</a>           |
| INTS6     | Integrator Complex Subunit 6                                      | Protein Coding | 38 | GC13M051354 | 3.108181 | <a href="https://www.genecards.org/cgi-bin/carddisp.pl?gene=INTS6">https://www.genecards.org/cgi-bin/carddisp.pl?gene=INTS6</a>         |
| DUSP26    | Dual Specificity Phosphatase 26                                   | Protein Coding | 37 | GC08M033591 | 3.105825 | <a href="https://www.genecards.org/cgi-bin/carddisp.pl?gene=DUSP26">https://www.genecards.org/cgi-bin/carddisp.pl?gene=DUSP26</a>       |
| PIGU      | Phosphatidylinositol Glycan Anchor Biosynthesis Class U           | Protein Coding | 37 | GC20M034560 | 3.103941 | <a href="https://www.genecards.org/cgi-bin/carddisp.pl?gene=PIGU">https://www.genecards.org/cgi-bin/carddisp.pl?gene=PIGU</a>           |

|          |                                                 |                |    |             |          |                                                                                                                                       |
|----------|-------------------------------------------------|----------------|----|-------------|----------|---------------------------------------------------------------------------------------------------------------------------------------|
| SLC39A6  | Solute Carrier Family 39 Member 6               | Protein Coding | 40 | GC18M036108 | 3.103225 | <a href="https://www.genecards.org/cgi-bin/carddisp.pl?gene=SLC39A6">https://www.genecards.org/cgi-bin/carddisp.pl?gene=SLC39A6</a>   |
| MED20    | Mediator Complex Subunit 20                     | Protein Coding | 37 | GC06M041905 | 3.102738 | <a href="https://www.genecards.org/cgi-bin/carddisp.pl?gene=MED20">https://www.genecards.org/cgi-bin/carddisp.pl?gene=MED20</a>       |
| KLF12    | Kruppel Like Factor 12                          | Protein Coding | 39 | GC13M073686 | 3.099366 | <a href="https://www.genecards.org/cgi-bin/carddisp.pl?gene=KLF12">https://www.genecards.org/cgi-bin/carddisp.pl?gene=KLF12</a>       |
| VWA5A    | Von Willebrand Factor A Domain Containing 5A    | Protein Coding | 34 | GC11P124115 | 3.098876 | <a href="https://www.genecards.org/cgi-bin/carddisp.pl?gene=VWA5A">https://www.genecards.org/cgi-bin/carddisp.pl?gene=VWA5A</a>       |
| FAM3A    | FAM3 Metabolism Regulating Signaling Molecule A | Protein Coding | 37 | GC0XM154506 | 3.098682 | <a href="https://www.genecards.org/cgi-bin/carddisp.pl?gene=FAM3A">https://www.genecards.org/cgi-bin/carddisp.pl?gene=FAM3A</a>       |
| PUS7     | Pseudouridine Synthase 7                        | Protein Coding | 41 | GC07M105439 | 3.096957 | <a href="https://www.genecards.org/cgi-bin/carddisp.pl?gene=PUS7">https://www.genecards.org/cgi-bin/carddisp.pl?gene=PUS7</a>         |
| DEFA1    | Defensin Alpha 1                                | Protein Coding | 41 | GC08M006977 | 3.092986 | <a href="https://www.genecards.org/cgi-bin/carddisp.pl?gene=DEFA1">https://www.genecards.org/cgi-bin/carddisp.pl?gene=DEFA1</a>       |
| KRTAP5-5 | Keratin Associated Protein 5-5                  | Protein Coding | 26 | GC11P001629 | 3.092125 | <a href="https://www.genecards.org/cgi-bin/carddisp.pl?gene=KRTAP5-5">https://www.genecards.org/cgi-bin/carddisp.pl?gene=KRTAP5-5</a> |
| SEC14L1  | SEC14 Like Lipid Binding 1                      | Protein Coding | 39 | GC17P077086 | 3.087129 | <a href="https://www.genecards.org/cgi-bin/carddisp.pl?gene=SEC14L1">https://www.genecards.org/cgi-bin/carddisp.pl?gene=SEC14L1</a>   |
| DDX46    | DEAD-Box Helicase 46                            | Protein Coding | 40 | GC05P134758 | 3.086512 | <a href="https://www.genecards.org/cgi-bin/carddisp.pl?gene=DDX46">https://www.genecards.org/cgi-bin/carddisp.pl?gene=DDX46</a>       |
| BHLHA9   | Basic Helix-Loop-Helix Family Member A9         | Protein Coding | 28 | GC17P001270 | 3.085235 | <a href="https://www.genecards.org/cgi-bin/carddisp.pl?gene=BHLHA9">https://www.genecards.org/cgi-bin/carddisp.pl?gene=BHLHA9</a>     |
| AVEN     | Apoptosis And Caspase Activation Inhibitor      | Protein Coding | 37 | GC15M033853 | 3.084106 | <a href="https://www.genecards.org/cgi-bin/carddisp.pl?gene=AVEN">https://www.genecards.org/cgi-bin/carddisp.pl?gene=AVEN</a>         |
| NBPF1    | NBPF Member 1                                   | Protein Coding | 31 | GC01M016562 | 3.081224 | <a href="https://www.genecards.org/cgi-bin/carddisp.pl?gene=NBPF1">https://www.genecards.org/cgi-bin/carddisp.pl?gene=NBPF1</a>       |
| KLHL6    | Kelch Like Family Member 6                      | Protein Coding | 36 | GC03M183487 | 3.080543 | <a href="https://www.genecards.org/cgi-bin/carddisp.pl?gene=KLHL6">https://www.genecards.org/cgi-bin/carddisp.pl?gene=KLHL6</a>       |
| ASAH2B   | N-Acylsphingosine Amidohydrolase 2B             | Protein Coding | 27 | GC10P050739 | 3.079664 | <a href="https://www.genecards.org/cgi-bin/carddisp.pl?gene=ASAH2B">https://www.genecards.org/cgi-bin/carddisp.pl?gene=ASAH2B</a>     |
| CDK19    | Cyclin Dependent Kinase 19                      | Protein Coding | 43 | GC06M110609 | 3.078501 | <a href="https://www.genecards.org/cgi-bin/carddisp.pl?gene=CDK19">https://www.genecards.org/cgi-bin/carddisp.pl?gene=CDK19</a>       |
| CDX1     | Caudal Type Homeobox 1                          | Protein Coding | 37 | GC05P150166 | 3.071558 | <a href="https://www.genecards.org/cgi-bin/carddisp.pl?gene=CDX1">https://www.genecards.org/cgi-bin/carddisp.pl?gene=CDX1</a>         |
| MIR181D  | MicroRNA 181d                                   | RNA Gene       | 18 | GC19P013874 | 3.067154 | <a href="https://www.genecards.org/cgi-bin/carddisp.pl?gene=MIR181D">https://www.genecards.org/cgi-bin/carddisp.pl?gene=MIR181D</a>   |
| SLC5A11  | Solute Carrier Family 5 Member 11               | Protein Coding | 41 | GC16P024859 | 3.061815 | <a href="https://www.genecards.org/cgi-bin/carddisp.pl?gene=SLC5A11">https://www.genecards.org/cgi-bin/carddisp.pl?gene=SLC5A11</a>   |

|              |                                                       |                   |    |             |          |                                                                                                                                               |
|--------------|-------------------------------------------------------|-------------------|----|-------------|----------|-----------------------------------------------------------------------------------------------------------------------------------------------|
| LOC110973015 | NOS3 5' Regulatory Region                             | Biological Region | 2  | GC07P150988 | 3.061494 | <a href="https://www.genecards.org/cgi-bin/carddisp.pl?gene=LOC110973015">https://www.genecards.org/cgi-bin/carddisp.pl?gene=LOC110973015</a> |
| CDH8         | Cadherin 8                                            | Protein Coding    | 41 | GC16M061647 | 3.059145 | <a href="https://www.genecards.org/cgi-bin/carddisp.pl?gene=CDH8">https://www.genecards.org/cgi-bin/carddisp.pl?gene=CDH8</a>                 |
| KCNIP4       | Potassium Voltage-Gated Channel Interacting Protein 4 | Protein Coding    | 39 | GC04M020728 | 3.058533 | <a href="https://www.genecards.org/cgi-bin/carddisp.pl?gene=KCNIP4">https://www.genecards.org/cgi-bin/carddisp.pl?gene=KCNIP4</a>             |
| SNHG18       | Small Nucleolar RNA Host Gene 18                      | RNA Gene          | 15 | GC05P009562 | 3.055027 | <a href="https://www.genecards.org/cgi-bin/carddisp.pl?gene=SNHG18">https://www.genecards.org/cgi-bin/carddisp.pl?gene=SNHG18</a>             |
| H2AC4        | H2A Clustered Histone 4                               | Protein Coding    | 30 | GC06M026034 | 3.052876 | <a href="https://www.genecards.org/cgi-bin/carddisp.pl?gene=H2AC4">https://www.genecards.org/cgi-bin/carddisp.pl?gene=H2AC4</a>               |
| FNBP1L       | Formin Binding Protein 1 Like                         | Protein Coding    | 36 | GC01P093448 | 3.051878 | <a href="https://www.genecards.org/cgi-bin/carddisp.pl?gene=FNBP1L">https://www.genecards.org/cgi-bin/carddisp.pl?gene=FNBP1L</a>             |
| PAXIP1       | PAX Interacting Protein 1                             | Protein Coding    | 37 | GC07M154943 | 3.049388 | <a href="https://www.genecards.org/cgi-bin/carddisp.pl?gene=PAXIP1">https://www.genecards.org/cgi-bin/carddisp.pl?gene=PAXIP1</a>             |
| GREB1        | Growth Regulating Estrogen Receptor Binding 1         | Protein Coding    | 37 | GC02P011482 | 3.048043 | <a href="https://www.genecards.org/cgi-bin/carddisp.pl?gene=GREB1">https://www.genecards.org/cgi-bin/carddisp.pl?gene=GREB1</a>               |
| LIMK2        | LIM Domain Kinase 2                                   | Protein Coding    | 48 | GC22P031212 | 3.04756  | <a href="https://www.genecards.org/cgi-bin/carddisp.pl?gene=LIMK2">https://www.genecards.org/cgi-bin/carddisp.pl?gene=LIMK2</a>               |
| COL21A1      | Collagen Type XXI Alpha 1 Chain                       | Protein Coding    | 37 | GC06M056057 | 3.045572 | <a href="https://www.genecards.org/cgi-bin/carddisp.pl?gene=COL21A1">https://www.genecards.org/cgi-bin/carddisp.pl?gene=COL21A1</a>           |
| LINC01016    | Long Intergenic Non-Protein Coding RNA 1016           | RNA Gene          | 13 | GC06M047659 | 3.04506  | <a href="https://www.genecards.org/cgi-bin/carddisp.pl?gene=LINC01016">https://www.genecards.org/cgi-bin/carddisp.pl?gene=LINC01016</a>       |
| HAS1         | Hyaluronan Synthase 1 Epidermal Growth Factor         | Protein Coding    | 40 | GC19M051714 | 3.044197 | <a href="https://www.genecards.org/cgi-bin/carddisp.pl?gene=HAS1">https://www.genecards.org/cgi-bin/carddisp.pl?gene=HAS1</a>                 |
| EPS15L1      | Receptor Pathway Substrate 15 Like 1                  | Protein Coding    | 41 | GC19M016333 | 3.040388 | <a href="https://www.genecards.org/cgi-bin/carddisp.pl?gene=EPS15L1">https://www.genecards.org/cgi-bin/carddisp.pl?gene=EPS15L1</a>           |
| GNAZ         | G Protein Subunit Alpha Z                             | Protein Coding    | 45 | GC22P023070 | 3.037711 | <a href="https://www.genecards.org/cgi-bin/carddisp.pl?gene=GNAZ">https://www.genecards.org/cgi-bin/carddisp.pl?gene=GNAZ</a>                 |
| HBP1         | HMG-Box Transcription Factor 1                        | Protein Coding    | 39 | GC07P107168 | 3.036912 | <a href="https://www.genecards.org/cgi-bin/carddisp.pl?gene=HBP1">https://www.genecards.org/cgi-bin/carddisp.pl?gene=HBP1</a>                 |
| EIF4A2       | Eukaryotic Translation Initiation Factor 4A2          | Protein Coding    | 45 | GC03P186783 | 3.035983 | <a href="https://www.genecards.org/cgi-bin/carddisp.pl?gene=EIF4A2">https://www.genecards.org/cgi-bin/carddisp.pl?gene=EIF4A2</a>             |
| TLN2         | Talin 2                                               | Protein Coding    | 40 | GC15P062390 | 3.034485 | <a href="https://www.genecards.org/cgi-bin/carddisp.pl?gene=TLN2">https://www.genecards.org/cgi-bin/carddisp.pl?gene=TLN2</a>                 |



|         |                                                                    |                   |    |                 |          |                                                                                                                                     |
|---------|--------------------------------------------------------------------|-------------------|----|-----------------|----------|-------------------------------------------------------------------------------------------------------------------------------------|
| PWWP3A  | PWWP Domain<br>Containing 3A,<br>DNA Repair<br>Factor              | Protein<br>Coding | 21 | GC19P0016<br>25 | 3.027288 | <a href="https://www.genecards.org/cgi-bin/carddisp.pl?gene=PWWP3A">https://www.genecards.org/cgi-bin/carddisp.pl?gene=PWWP3A</a>   |
| PPCS    | Phosphopantot<br>henoylcysteine<br>Synthetase<br>Translocase Of    | Protein<br>Coding | 40 | GC01P0424<br>56 | 3.023721 | <a href="https://www.genecards.org/cgi-bin/carddisp.pl?gene=PPCS">https://www.genecards.org/cgi-bin/carddisp.pl?gene=PPCS</a>       |
| TIMM8B  | Inner<br>Mitochondrial<br>Membrane 8<br>Homolog B                  | Protein<br>Coding | 38 | GC11M112<br>084 | 3.023216 | <a href="https://www.genecards.org/cgi-bin/carddisp.pl?gene=TIMM8B">https://www.genecards.org/cgi-bin/carddisp.pl?gene=TIMM8B</a>   |
| CDYL    | Chromodomai<br>n Y Like<br>MAU2 Sister                             | Protein<br>Coding | 41 | GC06P0047<br>06 | 3.021195 | <a href="https://www.genecards.org/cgi-bin/carddisp.pl?gene=CDYL">https://www.genecards.org/cgi-bin/carddisp.pl?gene=CDYL</a>       |
| MAU2    | Chromatid<br>Cohesion<br>Factor                                    | Protein<br>Coding | 33 | GC19P0193<br>20 | 3.019058 | <a href="https://www.genecards.org/cgi-bin/carddisp.pl?gene=MAU2">https://www.genecards.org/cgi-bin/carddisp.pl?gene=MAU2</a>       |
| KDM4B   | Lysine<br>Demethylase<br>4B                                        | Protein<br>Coding | 44 | GC19P0049<br>69 | 3.015503 | <a href="https://www.genecards.org/cgi-bin/carddisp.pl?gene=KDM4B">https://www.genecards.org/cgi-bin/carddisp.pl?gene=KDM4B</a>     |
| SGK3    | Serum/Glucoco<br>rticoid<br>Regulated<br>Kinase Family<br>Member 3 | Protein<br>Coding | 43 | GC08P0667<br>12 | 3.014399 | <a href="https://www.genecards.org/cgi-bin/carddisp.pl?gene=SGK3">https://www.genecards.org/cgi-bin/carddisp.pl?gene=SGK3</a>       |
| CYB561  | Cytochrome<br>B561                                                 | Protein<br>Coding | 41 | GC17M063<br>432 | 3.011662 | <a href="https://www.genecards.org/cgi-bin/carddisp.pl?gene=CYB561">https://www.genecards.org/cgi-bin/carddisp.pl?gene=CYB561</a>   |
| AMOTL1  | Angiomotin<br>Like 1                                               | Protein<br>Coding | 38 | GC11P0946<br>86 | 3.004309 | <a href="https://www.genecards.org/cgi-bin/carddisp.pl?gene=AMOTL1">https://www.genecards.org/cgi-bin/carddisp.pl?gene=AMOTL1</a>   |
| GTPBP2  | GTP Binding<br>Protein 2                                           | Protein<br>Coding | 39 | GC06M043<br>605 | 3.004073 | <a href="https://www.genecards.org/cgi-bin/carddisp.pl?gene=GTPBP2">https://www.genecards.org/cgi-bin/carddisp.pl?gene=GTPBP2</a>   |
| MIOX    | Myo-Inositol<br>Oxygenase<br>Ubiquitin                             | Protein<br>Coding | 39 | GC22P0504<br>86 | 3.00245  | <a href="https://www.genecards.org/cgi-bin/carddisp.pl?gene=MIOX">https://www.genecards.org/cgi-bin/carddisp.pl?gene=MIOX</a>       |
| UIMC1   | Interaction<br>Motif<br>Containing 1                               | Protein<br>Coding | 41 | GC05M176<br>905 | 2.999886 | <a href="https://www.genecards.org/cgi-bin/carddisp.pl?gene=UIMC1">https://www.genecards.org/cgi-bin/carddisp.pl?gene=UIMC1</a>     |
| MIR1183 | MicroRNA<br>1183                                                   | RNA<br>Gene       | 15 | GC07P0215<br>10 | 2.996562 | <a href="https://www.genecards.org/cgi-bin/carddisp.pl?gene=MIR1183">https://www.genecards.org/cgi-bin/carddisp.pl?gene=MIR1183</a> |
| CDH26   | Cadherin 26                                                        | Protein<br>Coding | 36 | GC20P0599<br>58 | 2.993687 | <a href="https://www.genecards.org/cgi-bin/carddisp.pl?gene=CDH26">https://www.genecards.org/cgi-bin/carddisp.pl?gene=CDH26</a>     |
| LGALS7  | Galectin 7                                                         | Protein<br>Coding | 38 | GC19M038<br>770 | 2.990034 | <a href="https://www.genecards.org/cgi-bin/carddisp.pl?gene=LGALS7">https://www.genecards.org/cgi-bin/carddisp.pl?gene=LGALS7</a>   |
| HIF3A   | Hypoxia<br>Inducible<br>Factor 3<br>Subunit Alpha                  | Protein<br>Coding | 40 | GC19P0462<br>97 | 2.98899  | <a href="https://www.genecards.org/cgi-bin/carddisp.pl?gene=HIF3A">https://www.genecards.org/cgi-bin/carddisp.pl?gene=HIF3A</a>     |
| CPLX3   | Complexin 3                                                        | Protein<br>Coding | 36 | GC15P0748<br>26 | 2.984288 | <a href="https://www.genecards.org/cgi-bin/carddisp.pl?gene=CPLX3">https://www.genecards.org/cgi-bin/carddisp.pl?gene=CPLX3</a>     |
| HOXA7   | Homeobox A7                                                        | Protein<br>Coding | 41 | GC07M027<br>153 | 2.982553 | <a href="https://www.genecards.org/cgi-bin/carddisp.pl?gene=HOXA7">https://www.genecards.org/cgi-bin/carddisp.pl?gene=HOXA7</a>     |
| PDE1C   | Phosphodiester<br>ase 1C                                           | Protein<br>Coding | 46 | GC07M031<br>616 | 2.979583 | <a href="https://www.genecards.org/cgi-bin/carddisp.pl?gene=PDE1C">https://www.genecards.org/cgi-bin/carddisp.pl?gene=PDE1C</a>     |

|                     |                                                                                                          |                   |    |                 |          |                                                                                                                                                     |
|---------------------|----------------------------------------------------------------------------------------------------------|-------------------|----|-----------------|----------|-----------------------------------------------------------------------------------------------------------------------------------------------------|
| AP1M2               | Adaptor<br>Related Protein<br>Complex 1<br>Subunit Mu 2                                                  | Protein<br>Coding | 41 | GC19M010<br>572 | 2.975761 | <a href="https://www.genecards.org/cgi-bin/carddisp.pl?gene=AP1M2">https://www.genecards.org/cgi-bin/carddisp.pl?gene=AP1M2</a>                     |
| FOXC2-<br>AS1       | FOXC2<br>Antisense RNA<br>1                                                                              | RNA<br>Gene       | 15 | GC16M086<br>566 | 2.975297 | <a href="https://www.genecards.org/cgi-bin/carddisp.pl?gene=FOXC2-AS1">https://www.genecards.org/cgi-bin/carddisp.pl?gene=FOXC2-AS1</a>             |
| TMEM97              | Transmembran<br>e Protein 97                                                                             | Protein<br>Coding | 36 | GC17P0283<br>19 | 2.974014 | <a href="https://www.genecards.org/cgi-bin/carddisp.pl?gene=TMEM97">https://www.genecards.org/cgi-bin/carddisp.pl?gene=TMEM97</a>                   |
| EPHA7               | EPH Receptor<br>A7                                                                                       | Protein<br>Coding | 49 | GC06M093<br>240 | 2.972818 | <a href="https://www.genecards.org/cgi-bin/carddisp.pl?gene=EPHA7">https://www.genecards.org/cgi-bin/carddisp.pl?gene=EPHA7</a>                     |
| NRDC                | Nardilysin<br>Convertase                                                                                 | Protein<br>Coding | 31 | GC01M051<br>790 | 2.965019 | <a href="https://www.genecards.org/cgi-bin/carddisp.pl?gene=NRDC">https://www.genecards.org/cgi-bin/carddisp.pl?gene=NRDC</a>                       |
| INTS11              | Integrator<br>Complex<br>Subunit 11                                                                      | Protein<br>Coding | 30 | GC01M002<br>704 | 2.958541 | <a href="https://www.genecards.org/cgi-bin/carddisp.pl?gene=INTS11">https://www.genecards.org/cgi-bin/carddisp.pl?gene=INTS11</a>                   |
| ZNF217              | Zinc Finger<br>Protein 217                                                                               | Protein<br>Coding | 39 | GC20M053<br>567 | 2.958487 | <a href="https://www.genecards.org/cgi-bin/carddisp.pl?gene=ZNF217">https://www.genecards.org/cgi-bin/carddisp.pl?gene=ZNF217</a>                   |
| COX6B2              | Cytochrome C<br>Oxidase<br>Subunit 6B2                                                                   | Protein<br>Coding | 32 | GC19M055<br>350 | 2.953898 | <a href="https://www.genecards.org/cgi-bin/carddisp.pl?gene=COX6B2">https://www.genecards.org/cgi-bin/carddisp.pl?gene=COX6B2</a>                   |
| EEF2K               | Eukaryotic<br>Elongation<br>Factor 2 Kinase                                                              | Protein<br>Coding | 47 | GC16P0222<br>17 | 2.949379 | <a href="https://www.genecards.org/cgi-bin/carddisp.pl?gene=EEF2K">https://www.genecards.org/cgi-bin/carddisp.pl?gene=EEF2K</a>                     |
| SVEP1               | Sushi, Von<br>Willebrand<br>Factor Type A,<br>EGF And<br>Pentraxin<br>Domain<br>Containing 1<br>CCR4-NOT | Protein<br>Coding | 36 | GC09M110<br>365 | 2.948899 | <a href="https://www.genecards.org/cgi-bin/carddisp.pl?gene=SVEP1">https://www.genecards.org/cgi-bin/carddisp.pl?gene=SVEP1</a>                     |
| CNOT4               | Transcription<br>Complex<br>Subunit 4                                                                    | Protein<br>Coding | 41 | GC07M135<br>361 | 2.946622 | <a href="https://www.genecards.org/cgi-bin/carddisp.pl?gene=CNOT4">https://www.genecards.org/cgi-bin/carddisp.pl?gene=CNOT4</a>                     |
| QSOX1               | Quiescin<br>Sulfhydryl<br>Oxidase 1                                                                      | Protein<br>Coding | 38 | GC01P1801<br>54 | 2.940781 | <a href="https://www.genecards.org/cgi-bin/carddisp.pl?gene=QSOX1">https://www.genecards.org/cgi-bin/carddisp.pl?gene=QSOX1</a>                     |
| SYNPO2              | Synaptopodin<br>2                                                                                        | Protein<br>Coding | 36 | GC04P1188<br>50 | 2.930421 | <a href="https://www.genecards.org/cgi-bin/carddisp.pl?gene=SYNPO2">https://www.genecards.org/cgi-bin/carddisp.pl?gene=SYNPO2</a>                   |
| H2BC11              | H2B Clustered<br>Histone 11                                                                              | Protein<br>Coding | 29 | GC06M046<br>548 | 2.928202 | <a href="https://www.genecards.org/cgi-bin/carddisp.pl?gene=H2BC11">https://www.genecards.org/cgi-bin/carddisp.pl?gene=H2BC11</a>                   |
| ENTPD2              | Ectonucleoside<br>Triphosphate<br>Diphosphohydr<br>olase 2                                               | Protein<br>Coding | 40 | GC09M137<br>048 | 2.925421 | <a href="https://www.genecards.org/cgi-bin/carddisp.pl?gene=ENTPD2">https://www.genecards.org/cgi-bin/carddisp.pl?gene=ENTPD2</a>                   |
| LINC00472           | Long Intergenic<br>Non-Protein<br>Coding RNA<br>472                                                      | RNA<br>Gene       | 22 | GC06M071<br>344 | 2.925195 | <a href="https://www.genecards.org/cgi-bin/carddisp.pl?gene=LINC00472">https://www.genecards.org/cgi-bin/carddisp.pl?gene=LINC00472</a>             |
| MSL2                | MSL Complex<br>Subunit 2                                                                                 | Protein<br>Coding | 34 | GC03M136<br>149 | 2.922533 | <a href="https://www.genecards.org/cgi-bin/carddisp.pl?gene=MSL2">https://www.genecards.org/cgi-bin/carddisp.pl?gene=MSL2</a>                       |
| ENSG0000<br>0253111 |                                                                                                          | RNA<br>Gene       | 7  | GC08P1254<br>66 | 2.917216 | <a href="https://www.genecards.org/cgi-bin/carddisp.pl?gene=ENSG00000253111">https://www.genecards.org/cgi-bin/carddisp.pl?gene=ENSG00000253111</a> |

|           |                                                                                     |                |    |             |          |                                                                                                                                         |
|-----------|-------------------------------------------------------------------------------------|----------------|----|-------------|----------|-----------------------------------------------------------------------------------------------------------------------------------------|
| TPD52L1   | TPD52 Like 1                                                                        | Protein Coding | 40 | GC06P125119 | 2.912905 | <a href="https://www.genecards.org/cgi-bin/carddisp.pl?gene=TPD52L1">https://www.genecards.org/cgi-bin/carddisp.pl?gene=TPD52L1</a>     |
| ODR4      | Odr-4 GPCR Localization Factor Homolog RAB32,                                       | Protein Coding | 25 | GC01P186376 | 2.910861 | <a href="https://www.genecards.org/cgi-bin/carddisp.pl?gene=ODR4">https://www.genecards.org/cgi-bin/carddisp.pl?gene=ODR4</a>           |
| RAB32     | Member RAS Oncogene Family                                                          | Protein Coding | 39 | GC06P146543 | 2.908951 | <a href="https://www.genecards.org/cgi-bin/carddisp.pl?gene=RAB32">https://www.genecards.org/cgi-bin/carddisp.pl?gene=RAB32</a>         |
| DTD1      | D-Aminoacyl-TRNA Deacylase 1                                                        | Protein Coding | 36 | GC20P018587 | 2.904941 | <a href="https://www.genecards.org/cgi-bin/carddisp.pl?gene=DTD1">https://www.genecards.org/cgi-bin/carddisp.pl?gene=DTD1</a>           |
| SMIM20    | Small Integral Membrane Protein 20                                                  | Protein Coding | 29 | GC04P025865 | 2.903644 | <a href="https://www.genecards.org/cgi-bin/carddisp.pl?gene=SMIM20">https://www.genecards.org/cgi-bin/carddisp.pl?gene=SMIM20</a>       |
| PARP10    | Poly(ADP-Ribose) Polymerase Family Member 10                                        | Protein Coding | 38 | GC08M143977 | 2.898402 | <a href="https://www.genecards.org/cgi-bin/carddisp.pl?gene=PARP10">https://www.genecards.org/cgi-bin/carddisp.pl?gene=PARP10</a>       |
| SNAPIN    | SNAP Associated Protein                                                             | Protein Coding | 38 | GC01P153660 | 2.894905 | <a href="https://www.genecards.org/cgi-bin/carddisp.pl?gene=SNAPIN">https://www.genecards.org/cgi-bin/carddisp.pl?gene=SNAPIN</a>       |
| TRPC4AP   | Transient Receptor Potential Cation Channel Subfamily C Member 4 Associated Protein | Protein Coding | 37 | GC20M035002 | 2.888846 | <a href="https://www.genecards.org/cgi-bin/carddisp.pl?gene=TRPC4AP">https://www.genecards.org/cgi-bin/carddisp.pl?gene=TRPC4AP</a>     |
| SEC23IP   | SEC23 Interacting Protein                                                           | Protein Coding | 40 | GC10P119892 | 2.888827 | <a href="https://www.genecards.org/cgi-bin/carddisp.pl?gene=SEC23IP">https://www.genecards.org/cgi-bin/carddisp.pl?gene=SEC23IP</a>     |
| SCGB1D2   | Secretoglobin Family 1D Member 2                                                    | Protein Coding | 33 | GC11P062260 | 2.880019 | <a href="https://www.genecards.org/cgi-bin/carddisp.pl?gene=SCGB1D2">https://www.genecards.org/cgi-bin/carddisp.pl?gene=SCGB1D2</a>     |
| FAM186B   | Family With Sequence Similarity 186 Member B                                        | Protein Coding | 33 | GC12M049582 | 2.879512 | <a href="https://www.genecards.org/cgi-bin/carddisp.pl?gene=FAM186B">https://www.genecards.org/cgi-bin/carddisp.pl?gene=FAM186B</a>     |
| LINC01194 | Long Intergenic Non-Protein Coding RNA 1194                                         | RNA Gene       | 16 | GC05P012578 | 2.878832 | <a href="https://www.genecards.org/cgi-bin/carddisp.pl?gene=LINC01194">https://www.genecards.org/cgi-bin/carddisp.pl?gene=LINC01194</a> |
| BECN2     | Beclin 2                                                                            | Protein Coding | 23 | GC01P241957 | 2.877337 | <a href="https://www.genecards.org/cgi-bin/carddisp.pl?gene=BECN2">https://www.genecards.org/cgi-bin/carddisp.pl?gene=BECN2</a>         |
| ANP32A    | Acidic Nuclear Phosphoprotein 32 Family Member A                                    | Protein Coding | 43 | GC15M068778 | 2.875695 | <a href="https://www.genecards.org/cgi-bin/carddisp.pl?gene=ANP32A">https://www.genecards.org/cgi-bin/carddisp.pl?gene=ANP32A</a>       |
| WDR59     | WD Repeat Domain 59                                                                 | Protein Coding | 37 | GC16M074871 | 2.874957 | <a href="https://www.genecards.org/cgi-bin/carddisp.pl?gene=WDR59">https://www.genecards.org/cgi-bin/carddisp.pl?gene=WDR59</a>         |

|          |                                                                     |                |    |             |          |                                                                                                                                       |
|----------|---------------------------------------------------------------------|----------------|----|-------------|----------|---------------------------------------------------------------------------------------------------------------------------------------|
| LELP1    | Late Cornified Envelope Like Proline Rich 1 Phosphatidylinositol-4- | Protein Coding | 32 | GC01P153175 | 2.873115 | <a href="https://www.genecards.org/cgi-bin/carddisp.pl?gene=LELP1">https://www.genecards.org/cgi-bin/carddisp.pl?gene=LELP1</a>       |
| PIP5K1A  | Phosphate 5-Kinase Type 1 Alpha                                     | Protein Coding | 45 | GC01P151198 | 2.86884  | <a href="https://www.genecards.org/cgi-bin/carddisp.pl?gene=PIP5K1A">https://www.genecards.org/cgi-bin/carddisp.pl?gene=PIP5K1A</a>   |
| NLN      | Neurolysin                                                          | Protein Coding | 41 | GC05P065722 | 2.859017 | <a href="https://www.genecards.org/cgi-bin/carddisp.pl?gene=NLN">https://www.genecards.org/cgi-bin/carddisp.pl?gene=NLN</a>           |
| CPSF1    | Cleavage And Polyadenylation Specific Factor 1 Chromatin            | Protein Coding | 40 | GC08M144393 | 2.858375 | <a href="https://www.genecards.org/cgi-bin/carddisp.pl?gene=CPSF1">https://www.genecards.org/cgi-bin/carddisp.pl?gene=CPSF1</a>       |
| CHAF1A   | Assembly Factor 1 Subunit A Vitamin K Epoxide                       | Protein Coding | 38 | GC19P004402 | 2.856692 | <a href="https://www.genecards.org/cgi-bin/carddisp.pl?gene=CHAF1A">https://www.genecards.org/cgi-bin/carddisp.pl?gene=CHAF1A</a>     |
| VKORC1L1 | Reductase Complex Subunit 1 Like 1                                  | Protein Coding | 38 | GC07P066213 | 2.855765 | <a href="https://www.genecards.org/cgi-bin/carddisp.pl?gene=VKORC1L1">https://www.genecards.org/cgi-bin/carddisp.pl?gene=VKORC1L1</a> |
| ZNFX1    | Zinc Finger NFX1-Type Containing 1                                  | Protein Coding | 34 | GC20M049238 | 2.855133 | <a href="https://www.genecards.org/cgi-bin/carddisp.pl?gene=ZNFX1">https://www.genecards.org/cgi-bin/carddisp.pl?gene=ZNFX1</a>       |
| BFAR     | Bifunctional Apoptosis Regulator                                    | Protein Coding | 38 | GC16P014637 | 2.848508 | <a href="https://www.genecards.org/cgi-bin/carddisp.pl?gene=BFAR">https://www.genecards.org/cgi-bin/carddisp.pl?gene=BFAR</a>         |
| AZIN2    | Antizyme Inhibitor 2                                                | Protein Coding | 36 | GC01P033081 | 2.847816 | <a href="https://www.genecards.org/cgi-bin/carddisp.pl?gene=AZIN2">https://www.genecards.org/cgi-bin/carddisp.pl?gene=AZIN2</a>       |
| MAFF     | MAF BZIP Transcription Factor F                                     | Protein Coding | 41 | GC22P038200 | 2.845722 | <a href="https://www.genecards.org/cgi-bin/carddisp.pl?gene=MAFF">https://www.genecards.org/cgi-bin/carddisp.pl?gene=MAFF</a>         |
| GLT8D2   | Glycosyltransferase 8 Domain Containing 2                           | Protein Coding | 36 | GC12M103988 | 2.843195 | <a href="https://www.genecards.org/cgi-bin/carddisp.pl?gene=GLT8D2">https://www.genecards.org/cgi-bin/carddisp.pl?gene=GLT8D2</a>     |
| DHX15    | DEAH-Box Helicase 15                                                | Protein Coding | 38 | GC04M024519 | 2.840756 | <a href="https://www.genecards.org/cgi-bin/carddisp.pl?gene=DHX15">https://www.genecards.org/cgi-bin/carddisp.pl?gene=DHX15</a>       |
| BCL2L15  | BCL2 Like 15                                                        | Protein Coding | 33 | GC01M113876 | 2.840091 | <a href="https://www.genecards.org/cgi-bin/carddisp.pl?gene=BCL2L15">https://www.genecards.org/cgi-bin/carddisp.pl?gene=BCL2L15</a>   |
| ACTR5    | Actin Related Protein 5                                             | Protein Coding | 35 | GC20P038748 | 2.83811  | <a href="https://www.genecards.org/cgi-bin/carddisp.pl?gene=ACTR5">https://www.genecards.org/cgi-bin/carddisp.pl?gene=ACTR5</a>       |
| SEMA7A   | Semaphorin 7A (John Milton Hagen Blood Group)                       | Protein Coding | 43 | GC15M074409 | 2.837412 | <a href="https://www.genecards.org/cgi-bin/carddisp.pl?gene=SEMA7A">https://www.genecards.org/cgi-bin/carddisp.pl?gene=SEMA7A</a>     |
| B4GALT6  | Beta-1,4-Galactosyltransferase 6                                    | Protein Coding | 41 | GC18M031622 | 2.836326 | <a href="https://www.genecards.org/cgi-bin/carddisp.pl?gene=B4GALT6">https://www.genecards.org/cgi-bin/carddisp.pl?gene=B4GALT6</a>   |
| DGKH     | Diacylglycerol Kinase Eta                                           | Protein Coding | 42 | GC13P042040 | 2.833042 | <a href="https://www.genecards.org/cgi-bin/carddisp.pl?gene=DGKH">https://www.genecards.org/cgi-bin/carddisp.pl?gene=DGKH</a>         |
| IFN1@    | Interferon, Type 1, Cluster                                         | Gene Cluster   | 4  | GC09U990039 | 2.83261  | <a href="https://www.genecards.org/cgi-bin/carddisp.pl?gene=IFN1%40">https://www.genecards.org/cgi-bin/carddisp.pl?gene=IFN1%40</a>   |
| RNF13    | Ring Finger Protein 13                                              | Protein Coding | 42 | GC03P149812 | 2.828979 | <a href="https://www.genecards.org/cgi-bin/carddisp.pl?gene=RNF13">https://www.genecards.org/cgi-bin/carddisp.pl?gene=RNF13</a>       |

|             |                                                                         |                |    |             |          |                                                                                                                                             |
|-------------|-------------------------------------------------------------------------|----------------|----|-------------|----------|---------------------------------------------------------------------------------------------------------------------------------------------|
| ULK2        | Unc-51 Like Autophagy Activating Kinase 2                               | Protein Coding | 41 | GC17M021706 | 2.828438 | <a href="https://www.genecards.org/cgi-bin/carddisp.pl?gene=ULK2">https://www.genecards.org/cgi-bin/carddisp.pl?gene=ULK2</a>               |
| PIK3C2B     | Phosphatidylinositol-4-Phosphate 3-Kinase Catalytic Subunit Type 2 Beta | Protein Coding | 48 | GC01M204422 | 2.825679 | <a href="https://www.genecards.org/cgi-bin/carddisp.pl?gene=PIK3C2B">https://www.genecards.org/cgi-bin/carddisp.pl?gene=PIK3C2B</a>         |
| MLXIP       | MLX Interacting Protein                                                 | Protein Coding | 33 | GC12P122078 | 2.82372  | <a href="https://www.genecards.org/cgi-bin/carddisp.pl?gene=MLXIP">https://www.genecards.org/cgi-bin/carddisp.pl?gene=MLXIP</a>             |
| RUSC2       | RUN And SH3 Domain Containing 2                                         | Protein Coding | 37 | GC09P035490 | 2.823524 | <a href="https://www.genecards.org/cgi-bin/carddisp.pl?gene=RUSC2">https://www.genecards.org/cgi-bin/carddisp.pl?gene=RUSC2</a>             |
| DDX60       | DEXD/H-Box Helicase 60                                                  | Protein Coding | 35 | GC04M168216 | 2.821466 | <a href="https://www.genecards.org/cgi-bin/carddisp.pl?gene=DDX60">https://www.genecards.org/cgi-bin/carddisp.pl?gene=DDX60</a>             |
| MSL1        | MSL Complex Subunit 1                                                   | Protein Coding | 34 | GC17P040122 | 2.816136 | <a href="https://www.genecards.org/cgi-bin/carddisp.pl?gene=MSL1">https://www.genecards.org/cgi-bin/carddisp.pl?gene=MSL1</a>               |
| TSNAX-DISC1 | TSNAX-DISC1 Readthrough (NMD Candidate)                                 | RNA Gene       | 19 | GC01P231528 | 2.8153   | <a href="https://www.genecards.org/cgi-bin/carddisp.pl?gene=TSNAX-DISC1">https://www.genecards.org/cgi-bin/carddisp.pl?gene=TSNAX-DISC1</a> |
| CAPSL       | Calcyphosine Like SPT7 Like, STAGA                                      | Protein Coding | 34 | GC05M035906 | 2.814205 | <a href="https://www.genecards.org/cgi-bin/carddisp.pl?gene=CAPSL">https://www.genecards.org/cgi-bin/carddisp.pl?gene=CAPSL</a>             |
| SUPT7L      | Complex Subunit Gamma                                                   | Protein Coding | 32 | GC02M027711 | 2.812148 | <a href="https://www.genecards.org/cgi-bin/carddisp.pl?gene=SUPT7L">https://www.genecards.org/cgi-bin/carddisp.pl?gene=SUPT7L</a>           |
| CEP170      | Centrosomal Protein 170                                                 | Protein Coding | 40 | GC01M243124 | 2.810482 | <a href="https://www.genecards.org/cgi-bin/carddisp.pl?gene=CEP170">https://www.genecards.org/cgi-bin/carddisp.pl?gene=CEP170</a>           |
| PLEKHA7     | Pleckstrin Homology Domain Containing A7                                | Protein Coding | 38 | GC11M016778 | 2.809566 | <a href="https://www.genecards.org/cgi-bin/carddisp.pl?gene=PLEKHA7">https://www.genecards.org/cgi-bin/carddisp.pl?gene=PLEKHA7</a>         |
| CLCA2       | Chloride Channel Accessory 2                                            | Protein Coding | 41 | GC01P086424 | 2.805415 | <a href="https://www.genecards.org/cgi-bin/carddisp.pl?gene=CLCA2">https://www.genecards.org/cgi-bin/carddisp.pl?gene=CLCA2</a>             |
| TM4SF5      | Transmembrane 4 L Six Family Member 5                                   | Protein Coding | 34 | GC17P004771 | 2.804374 | <a href="https://www.genecards.org/cgi-bin/carddisp.pl?gene=TM4SF5">https://www.genecards.org/cgi-bin/carddisp.pl?gene=TM4SF5</a>           |
| H3C4        | H3 Clustered Histone 4                                                  | Protein Coding | 31 | GC06M047216 | 2.797997 | <a href="https://www.genecards.org/cgi-bin/carddisp.pl?gene=H3C4">https://www.genecards.org/cgi-bin/carddisp.pl?gene=H3C4</a>               |
| CAAP1       | Caspase Activity And Apoptosis Inhibitor 1                              | Protein Coding | 31 | GC09M026840 | 2.794522 | <a href="https://www.genecards.org/cgi-bin/carddisp.pl?gene=CAAP1">https://www.genecards.org/cgi-bin/carddisp.pl?gene=CAAP1</a>             |
| GCAT        | Glycine C-Acetyltransferase                                             | Protein Coding | 43 | GC22P037807 | 2.793952 | <a href="https://www.genecards.org/cgi-bin/carddisp.pl?gene=GCAT">https://www.genecards.org/cgi-bin/carddisp.pl?gene=GCAT</a>               |
| COPZ1       | COPI Coat Complex Subunit Zeta 1                                        | Protein Coding | 40 | GC12P054301 | 2.788088 | <a href="https://www.genecards.org/cgi-bin/carddisp.pl?gene=COPZ1">https://www.genecards.org/cgi-bin/carddisp.pl?gene=COPZ1</a>             |

|          |                                                     |                |    |             |          |                                                                                                                                       |
|----------|-----------------------------------------------------|----------------|----|-------------|----------|---------------------------------------------------------------------------------------------------------------------------------------|
| UQCRHL   | Ubiquinol-Cytochrome C Reductase Hinge Protein Like | Protein Coding | 23 | GC01M015808 | 2.786937 | <a href="https://www.genecards.org/cgi-bin/carddisp.pl?gene=UQCRHL">https://www.genecards.org/cgi-bin/carddisp.pl?gene=UQCRHL</a>     |
| DGAT2L6  | O-Acyltransferase 2 Like 6                          | Protein Coding | 30 | GC0XP070177 | 2.786317 | <a href="https://www.genecards.org/cgi-bin/carddisp.pl?gene=DGAT2L6">https://www.genecards.org/cgi-bin/carddisp.pl?gene=DGAT2L6</a>   |
| H3C15    | H3 Clustered Histone 15                             | Protein Coding | 27 | GC01P149970 | 2.786226 | <a href="https://www.genecards.org/cgi-bin/carddisp.pl?gene=H3C15">https://www.genecards.org/cgi-bin/carddisp.pl?gene=H3C15</a>       |
| SDF2L1   | Stromal Cell Derived Factor 2 Like 1                | Protein Coding | 35 | GC22P026487 | 2.786216 | <a href="https://www.genecards.org/cgi-bin/carddisp.pl?gene=SDF2L1">https://www.genecards.org/cgi-bin/carddisp.pl?gene=SDF2L1</a>     |
| FHL5     | Four And A Half LIM Domains 5                       | Protein Coding | 38 | GC06P096562 | 2.786175 | <a href="https://www.genecards.org/cgi-bin/carddisp.pl?gene=FHL5">https://www.genecards.org/cgi-bin/carddisp.pl?gene=FHL5</a>         |
| TCF7L1   | Transcription Factor 7 Like 1                       | Protein Coding | 42 | GC02P085133 | 2.783878 | <a href="https://www.genecards.org/cgi-bin/carddisp.pl?gene=TCF7L1">https://www.genecards.org/cgi-bin/carddisp.pl?gene=TCF7L1</a>     |
| PLSCR1   | Phospholipid Scramblase 1                           | Protein Coding | 44 | GC03M146515 | 2.782262 | <a href="https://www.genecards.org/cgi-bin/carddisp.pl?gene=PLSCR1">https://www.genecards.org/cgi-bin/carddisp.pl?gene=PLSCR1</a>     |
| EBNA1BP2 | EBNA1 Binding Protein 2                             | Protein Coding | 38 | GC01M043165 | 2.773913 | <a href="https://www.genecards.org/cgi-bin/carddisp.pl?gene=EBNA1BP2">https://www.genecards.org/cgi-bin/carddisp.pl?gene=EBNA1BP2</a> |
| RUBCNL   | Rubicon Like Autophagy Enhancer                     | Protein Coding | 26 | GC13M046343 | 2.773623 | <a href="https://www.genecards.org/cgi-bin/carddisp.pl?gene=RUBCNL">https://www.genecards.org/cgi-bin/carddisp.pl?gene=RUBCNL</a>     |
| H3C6     | H3 Clustered Histone 6                              | Protein Coding | 28 | GC06P055588 | 2.769617 | <a href="https://www.genecards.org/cgi-bin/carddisp.pl?gene=H3C6">https://www.genecards.org/cgi-bin/carddisp.pl?gene=H3C6</a>         |
| HMGB2    | High Mobility Group Box 2 Protein                   | Protein Coding | 41 | GC04M173331 | 2.767611 | <a href="https://www.genecards.org/cgi-bin/carddisp.pl?gene=HMGB2">https://www.genecards.org/cgi-bin/carddisp.pl?gene=HMGB2</a>       |
| PPM1A    | Phosphatase, Mg2+/Mn2+ Dependent 1A                 | Protein Coding | 45 | GC14P060245 | 2.765466 | <a href="https://www.genecards.org/cgi-bin/carddisp.pl?gene=PPM1A">https://www.genecards.org/cgi-bin/carddisp.pl?gene=PPM1A</a>       |
| ELF3     | E74 Like ETS Transcription Factor 3                 | Protein Coding | 40 | GC01P202007 | 2.764115 | <a href="https://www.genecards.org/cgi-bin/carddisp.pl?gene=ELF3">https://www.genecards.org/cgi-bin/carddisp.pl?gene=ELF3</a>         |
| FZR1     | Fizzy And Cell Division Cycle 20 Related 1          | Protein Coding | 43 | GC19P003506 | 2.760143 | <a href="https://www.genecards.org/cgi-bin/carddisp.pl?gene=FZR1">https://www.genecards.org/cgi-bin/carddisp.pl?gene=FZR1</a>         |
| ZNF101   | Zinc Finger Protein 101                             | Protein Coding | 34 | GC19P026665 | 2.759101 | <a href="https://www.genecards.org/cgi-bin/carddisp.pl?gene=ZNF101">https://www.genecards.org/cgi-bin/carddisp.pl?gene=ZNF101</a>     |
| SPCS2    | Peptidase Complex Subunit 2                         | Protein Coding | 35 | GC11P076258 | 2.759062 | <a href="https://www.genecards.org/cgi-bin/carddisp.pl?gene=SPCS2">https://www.genecards.org/cgi-bin/carddisp.pl?gene=SPCS2</a>       |
| RESF1    | Retroelement Silencing Factor 1                     | Protein Coding | 25 | GC12P032003 | 2.757162 | <a href="https://www.genecards.org/cgi-bin/carddisp.pl?gene=RESF1">https://www.genecards.org/cgi-bin/carddisp.pl?gene=RESF1</a>       |
| MAFA     | MAF BZIP Transcription Factor A                     | Protein Coding | 42 | GC08M143419 | 2.757057 | <a href="https://www.genecards.org/cgi-bin/carddisp.pl?gene=MAFA">https://www.genecards.org/cgi-bin/carddisp.pl?gene=MAFA</a>         |
| STRA8    | Stimulated By Retinoic Acid 8                       | Protein Coding | 36 | GC07P135231 | 2.756898 | <a href="https://www.genecards.org/cgi-bin/carddisp.pl?gene=STRA8">https://www.genecards.org/cgi-bin/carddisp.pl?gene=STRA8</a>       |
| H3C11    | H3 Clustered Histone 11                             | Protein Coding | 28 | GC06M047214 | 2.754311 | <a href="https://www.genecards.org/cgi-bin/carddisp.pl?gene=H3C11">https://www.genecards.org/cgi-bin/carddisp.pl?gene=H3C11</a>       |

|         |                                                            |                |    |             |          |                                                                                                                                     |
|---------|------------------------------------------------------------|----------------|----|-------------|----------|-------------------------------------------------------------------------------------------------------------------------------------|
| SURF4   | Surfeit 4                                                  | Protein Coding | 39 | GC09M133361 | 2.752711 | <a href="https://www.genecards.org/cgi-bin/carddisp.pl?gene=SURF4">https://www.genecards.org/cgi-bin/carddisp.pl?gene=SURF4</a>     |
| RALBP1  | RalA Binding Protein 1                                     | Protein Coding | 45 | GC18P009465 | 2.752016 | <a href="https://www.genecards.org/cgi-bin/carddisp.pl?gene=RALBP1">https://www.genecards.org/cgi-bin/carddisp.pl?gene=RALBP1</a>   |
| RAB25   | RAB25, Member RAS Oncogene Family T Cell                   | Protein Coding | 40 | GC01P156061 | 2.751238 | <a href="https://www.genecards.org/cgi-bin/carddisp.pl?gene=RAB25">https://www.genecards.org/cgi-bin/carddisp.pl?gene=RAB25</a>     |
| TIMD4   | Immunoglobulin And Mucin Domain Containing 4               | Protein Coding | 37 | GC05M156919 | 2.750753 | <a href="https://www.genecards.org/cgi-bin/carddisp.pl?gene=TIMD4">https://www.genecards.org/cgi-bin/carddisp.pl?gene=TIMD4</a>     |
| TMEM109 | Transmembrane Protein 109                                  | Protein Coding | 32 | GC11P060914 | 2.74667  | <a href="https://www.genecards.org/cgi-bin/carddisp.pl?gene=TMEM109">https://www.genecards.org/cgi-bin/carddisp.pl?gene=TMEM109</a> |
| ZC3HAV1 | Zinc Finger CCH-Type Containing, Antiviral 1               | Protein Coding | 38 | GC07M139044 | 2.746261 | <a href="https://www.genecards.org/cgi-bin/carddisp.pl?gene=ZC3HAV1">https://www.genecards.org/cgi-bin/carddisp.pl?gene=ZC3HAV1</a> |
| AHRR    | Aryl-Hydrocarbon Receptor Repressor Zinc Finger            | Protein Coding | 36 | GC05P000321 | 2.744704 | <a href="https://www.genecards.org/cgi-bin/carddisp.pl?gene=AHRR">https://www.genecards.org/cgi-bin/carddisp.pl?gene=AHRR</a>       |
| ZBTB2   | And BTB Domain Containing 2                                | Protein Coding | 34 | GC06M151364 | 2.742771 | <a href="https://www.genecards.org/cgi-bin/carddisp.pl?gene=ZBTB2">https://www.genecards.org/cgi-bin/carddisp.pl?gene=ZBTB2</a>     |
| GMFB    | Glia Maturation Factor Beta                                | Protein Coding | 41 | GC14M054474 | 2.742506 | <a href="https://www.genecards.org/cgi-bin/carddisp.pl?gene=GMFB">https://www.genecards.org/cgi-bin/carddisp.pl?gene=GMFB</a>       |
| PCDHB4  | Protocadherin Beta 4 Vesicle                               | Protein Coding | 37 | GC05P143796 | 2.741513 | <a href="https://www.genecards.org/cgi-bin/carddisp.pl?gene=PCDHB4">https://www.genecards.org/cgi-bin/carddisp.pl?gene=PCDHB4</a>   |
| VAMP3   | Associated Membrane Protein 3                              | Protein Coding | 43 | GC01P007765 | 2.735823 | <a href="https://www.genecards.org/cgi-bin/carddisp.pl?gene=VAMP3">https://www.genecards.org/cgi-bin/carddisp.pl?gene=VAMP3</a>     |
| PARP2   | Poly(ADP-Ribose) Polymerase 2                              | Protein Coding | 47 | GC14P020343 | 2.731313 | <a href="https://www.genecards.org/cgi-bin/carddisp.pl?gene=PARP2">https://www.genecards.org/cgi-bin/carddisp.pl?gene=PARP2</a>     |
| ZNF267  | Zinc Finger Protein 267                                    | Protein Coding | 36 | GC16P032629 | 2.73066  | <a href="https://www.genecards.org/cgi-bin/carddisp.pl?gene=ZNF267">https://www.genecards.org/cgi-bin/carddisp.pl?gene=ZNF267</a>   |
| KLK13   | Kallikrein Related Peptidase 13                            | Protein Coding | 40 | GC19M051056 | 2.728004 | <a href="https://www.genecards.org/cgi-bin/carddisp.pl?gene=KLK13">https://www.genecards.org/cgi-bin/carddisp.pl?gene=KLK13</a>     |
| GLCE    | Glucuronic Acid Epimerase                                  | Protein Coding | 40 | GC15P077108 | 2.72756  | <a href="https://www.genecards.org/cgi-bin/carddisp.pl?gene=GLCE">https://www.genecards.org/cgi-bin/carddisp.pl?gene=GLCE</a>       |
| PGAP6   | Post-Glycosylphosphatidylinositol Attachment To Proteins 6 | Protein Coding | 26 | GC16M000370 | 2.723347 | <a href="https://www.genecards.org/cgi-bin/carddisp.pl?gene=PGAP6">https://www.genecards.org/cgi-bin/carddisp.pl?gene=PGAP6</a>     |
| RTCB    | RNA 2',3'-Cyclic Phosphate And 5'-OH Ligase                | Protein Coding | 36 | GC22M032387 | 2.72297  | <a href="https://www.genecards.org/cgi-bin/carddisp.pl?gene=RTCB">https://www.genecards.org/cgi-bin/carddisp.pl?gene=RTCB</a>       |

|              |                                                  |                |    |             |          |                                                                                                                                               |
|--------------|--------------------------------------------------|----------------|----|-------------|----------|-----------------------------------------------------------------------------------------------------------------------------------------------|
| KTN1         | Kinectin 1                                       | Protein Coding | 40 | GC14P055559 | 2.722031 | <a href="https://www.genecards.org/cgi-bin/carddisp.pl?gene=KTN1">https://www.genecards.org/cgi-bin/carddisp.pl?gene=KTN1</a>                 |
| SLC45A3      | Solute Carrier Family 45 Member 3                | Protein Coding | 40 | GC01M205626 | 2.7165   | <a href="https://www.genecards.org/cgi-bin/carddisp.pl?gene=SLC45A3">https://www.genecards.org/cgi-bin/carddisp.pl?gene=SLC45A3</a>           |
| APOBR        | Apolipoprotein B Receptor                        | Protein Coding | 33 | GC16P028494 | 2.710127 | <a href="https://www.genecards.org/cgi-bin/carddisp.pl?gene=APOBR">https://www.genecards.org/cgi-bin/carddisp.pl?gene=APOBR</a>               |
| IPO7         | Importin 7                                       | Protein Coding | 38 | GC11P009384 | 2.707721 | <a href="https://www.genecards.org/cgi-bin/carddisp.pl?gene=IPO7">https://www.genecards.org/cgi-bin/carddisp.pl?gene=IPO7</a>                 |
| EPSTI1       | Epithelial Stromal Interaction 1                 | Protein Coding | 36 | GC13M042886 | 2.702394 | <a href="https://www.genecards.org/cgi-bin/carddisp.pl?gene=EPSTI1">https://www.genecards.org/cgi-bin/carddisp.pl?gene=EPSTI1</a>             |
| NECTIN4      | Nectin Cell Adhesion Molecule 4                  | Protein Coding | 38 | GC01M161071 | 2.696864 | <a href="https://www.genecards.org/cgi-bin/carddisp.pl?gene=NECTIN4">https://www.genecards.org/cgi-bin/carddisp.pl?gene=NECTIN4</a>           |
| RAC3         | Rac Family Small GTPase 3                        | Protein Coding | 46 | GC17P082031 | 2.693315 | <a href="https://www.genecards.org/cgi-bin/carddisp.pl?gene=RAC3">https://www.genecards.org/cgi-bin/carddisp.pl?gene=RAC3</a>                 |
| H3C8         | H3 Clustered Histone 8                           | Protein Coding | 29 | GC06M047218 | 2.689676 | <a href="https://www.genecards.org/cgi-bin/carddisp.pl?gene=H3C8">https://www.genecards.org/cgi-bin/carddisp.pl?gene=H3C8</a>                 |
| SLC2A6       | Solute Carrier Family 2 Member 6                 | Protein Coding | 42 | GC09M133471 | 2.687112 | <a href="https://www.genecards.org/cgi-bin/carddisp.pl?gene=SLC2A6">https://www.genecards.org/cgi-bin/carddisp.pl?gene=SLC2A6</a>             |
| ANGPTL2      | Angiopoietin Like 2                              | Protein Coding | 36 | GC09M127087 | 2.68692  | <a href="https://www.genecards.org/cgi-bin/carddisp.pl?gene=ANGPTL2">https://www.genecards.org/cgi-bin/carddisp.pl?gene=ANGPTL2</a>           |
| MIR646HG     | MIR646 Host Gene                                 | RNA Gene       | 15 | GC20P060088 | 2.681141 | <a href="https://www.genecards.org/cgi-bin/carddisp.pl?gene=MIR646HG">https://www.genecards.org/cgi-bin/carddisp.pl?gene=MIR646HG</a>         |
| PRR5-ARHGAP8 | PRR5-ARHGAP8 Readthrough                         | Protein Coding | 27 | GC22P044702 | 2.681102 | <a href="https://www.genecards.org/cgi-bin/carddisp.pl?gene=PRR5-ARHGAP8">https://www.genecards.org/cgi-bin/carddisp.pl?gene=PRR5-ARHGAP8</a> |
| MED14        | Mediator Complex Subunit 14                      | Protein Coding | 40 | GC0XM040648 | 2.68012  | <a href="https://www.genecards.org/cgi-bin/carddisp.pl?gene=MED14">https://www.genecards.org/cgi-bin/carddisp.pl?gene=MED14</a>               |
| RAMP3        | Receptor Activity Modifying Protein 3            | Protein Coding | 41 | GC07P045163 | 2.679981 | <a href="https://www.genecards.org/cgi-bin/carddisp.pl?gene=RAMP3">https://www.genecards.org/cgi-bin/carddisp.pl?gene=RAMP3</a>               |
| SMC6         | Structural Maintenance Of Chromosomes 6          | Protein Coding | 35 | GC02M017663 | 2.67877  | <a href="https://www.genecards.org/cgi-bin/carddisp.pl?gene=SMC6">https://www.genecards.org/cgi-bin/carddisp.pl?gene=SMC6</a>                 |
| HCAR2        | Hydroxycarboxylic Acid Receptor 2                | Protein Coding | 38 | GC12M122701 | 2.676188 | <a href="https://www.genecards.org/cgi-bin/carddisp.pl?gene=HCAR2">https://www.genecards.org/cgi-bin/carddisp.pl?gene=HCAR2</a>               |
| ZNF574       | Zinc Finger Protein 574                          | Protein Coding | 33 | GC19P042068 | 2.670589 | <a href="https://www.genecards.org/cgi-bin/carddisp.pl?gene=ZNF574">https://www.genecards.org/cgi-bin/carddisp.pl?gene=ZNF574</a>             |
| COP1         | COP1 E3 Ubiquitin Ligase                         | Protein Coding | 34 | GC01M175944 | 2.670171 | <a href="https://www.genecards.org/cgi-bin/carddisp.pl?gene=COP1">https://www.genecards.org/cgi-bin/carddisp.pl?gene=COP1</a>                 |
| TLE3         | TLE Family Member 3, Transcriptional Corepressor | Protein Coding | 44 | GC15M070047 | 2.668141 | <a href="https://www.genecards.org/cgi-bin/carddisp.pl?gene=TLE3">https://www.genecards.org/cgi-bin/carddisp.pl?gene=TLE3</a>                 |
| HDAC11       | Histone Deacetylase 11                           | Protein Coding | 44 | GC03P013478 | 2.667408 | <a href="https://www.genecards.org/cgi-bin/carddisp.pl?gene=HDAC11">https://www.genecards.org/cgi-bin/carddisp.pl?gene=HDAC11</a>             |



|                 |                                                          |                   |    |             |          |                                                                                                                                                     |
|-----------------|----------------------------------------------------------|-------------------|----|-------------|----------|-----------------------------------------------------------------------------------------------------------------------------------------------------|
| BCAR4           | Breast Cancer Anti-Estrogen Resistance 4                 | RNA Gene          | 17 | GC16M011819 | 2.667309 | <a href="https://www.genecards.org/cgi-bin/carddisp.pl?gene=BCAR4">https://www.genecards.org/cgi-bin/carddisp.pl?gene=BCAR4</a>                     |
| SART3           | Spliceosome Associated Factor 3, U4/U6 Recycling Protein | Protein Coding    | 37 | GC12M108522 | 2.6658   | <a href="https://www.genecards.org/cgi-bin/carddisp.pl?gene=SART3">https://www.genecards.org/cgi-bin/carddisp.pl?gene=SART3</a>                     |
| DDO             | D-Aspartate Oxidase                                      | Protein Coding    | 40 | GC06M110391 | 2.664339 | <a href="https://www.genecards.org/cgi-bin/carddisp.pl?gene=DDO">https://www.genecards.org/cgi-bin/carddisp.pl?gene=DDO</a>                         |
| MUCL1           | Mucin Like 1                                             | Protein Coding    | 32 | GC12P054830 | 2.664232 | <a href="https://www.genecards.org/cgi-bin/carddisp.pl?gene=MUCL1">https://www.genecards.org/cgi-bin/carddisp.pl?gene=MUCL1</a>                     |
| PLCH1           | Phospholipase C Eta 1                                    | Protein Coding    | 39 | GC03M155381 | 2.663233 | <a href="https://www.genecards.org/cgi-bin/carddisp.pl?gene=PLCH1">https://www.genecards.org/cgi-bin/carddisp.pl?gene=PLCH1</a>                     |
| LOC110596866    | CYP7A1 5' Regulatory Region                              | Biological Region | 1  | GC08P058498 | 2.656094 | <a href="https://www.genecards.org/cgi-bin/carddisp.pl?gene=LOC110596866">https://www.genecards.org/cgi-bin/carddisp.pl?gene=LOC110596866</a>       |
| PGA3            | Pepsinogen A3                                            | Protein Coding    | 34 | GC11P061203 | 2.651723 | <a href="https://www.genecards.org/cgi-bin/carddisp.pl?gene=PGA3">https://www.genecards.org/cgi-bin/carddisp.pl?gene=PGA3</a>                       |
| EIF5B           | Eukaryotic Translation Initiation Factor 5B              | Protein Coding    | 38 | GC02P099320 | 2.645843 | <a href="https://www.genecards.org/cgi-bin/carddisp.pl?gene=EIF5B">https://www.genecards.org/cgi-bin/carddisp.pl?gene=EIF5B</a>                     |
| BRMS1L          | BRMS1 Like Transcriptional Repressor                     | Protein Coding    | 35 | GC14P035840 | 2.643856 | <a href="https://www.genecards.org/cgi-bin/carddisp.pl?gene=BRMS1L">https://www.genecards.org/cgi-bin/carddisp.pl?gene=BRMS1L</a>                   |
| GPR107          | G Protein-Coupled Receptor 107                           | Protein Coding    | 36 | GC09P130053 | 2.64118  | <a href="https://www.genecards.org/cgi-bin/carddisp.pl?gene=GPR107">https://www.genecards.org/cgi-bin/carddisp.pl?gene=GPR107</a>                   |
| POLR1G          | RNA Polymerase I Subunit G Protein                       | Protein Coding    | 27 | GC19P045409 | 2.638262 | <a href="https://www.genecards.org/cgi-bin/carddisp.pl?gene=POLR1G">https://www.genecards.org/cgi-bin/carddisp.pl?gene=POLR1G</a>                   |
| PTPN9           | Tyrosine Phosphatase Non-Receptor Type 9                 | Protein Coding    | 41 | GC15M075463 | 2.637581 | <a href="https://www.genecards.org/cgi-bin/carddisp.pl?gene=PTPN9">https://www.genecards.org/cgi-bin/carddisp.pl?gene=PTPN9</a>                     |
| TUBGCP4         | Tubulin Gamma Complex Associated Protein 4               | Protein Coding    | 39 | GC15P043369 | 2.626695 | <a href="https://www.genecards.org/cgi-bin/carddisp.pl?gene=TUBGCP4">https://www.genecards.org/cgi-bin/carddisp.pl?gene=TUBGCP4</a>                 |
| ENSG00000231487 |                                                          | RNA Gene          | 6  | GC11M001683 | 2.623965 | <a href="https://www.genecards.org/cgi-bin/carddisp.pl?gene=ENSG00000231487">https://www.genecards.org/cgi-bin/carddisp.pl?gene=ENSG00000231487</a> |
| TRMT2A          | TRNA Methyltransferase 2 Homolog A                       | Protein Coding    | 39 | GC22M020099 | 2.621841 | <a href="https://www.genecards.org/cgi-bin/carddisp.pl?gene=TRMT2A">https://www.genecards.org/cgi-bin/carddisp.pl?gene=TRMT2A</a>                   |
| ZDHHC18         | Zinc Finger DHHC-Type Palmitoyltransferase 18            | Protein Coding    | 34 | GC01P026911 | 2.621691 | <a href="https://www.genecards.org/cgi-bin/carddisp.pl?gene=ZDHHC18">https://www.genecards.org/cgi-bin/carddisp.pl?gene=ZDHHC18</a>                 |
| C16orf95        | Chromosome 16 Open Reading Frame 95                      | Protein Coding    | 26 | GC16M087119 | 2.620677 | <a href="https://www.genecards.org/cgi-bin/carddisp.pl?gene=C16orf95">https://www.genecards.org/cgi-bin/carddisp.pl?gene=C16orf95</a>               |

|          |                                                  |                |    |             |          |                                                                                                                                       |
|----------|--------------------------------------------------|----------------|----|-------------|----------|---------------------------------------------------------------------------------------------------------------------------------------|
| H2BC18   | H2B Clustered Histone 18 Non-SMC                 | Protein Coding | 27 | GC01M150113 | 2.620003 | <a href="https://www.genecards.org/cgi-bin/carddisp.pl?gene=H2BC18">https://www.genecards.org/cgi-bin/carddisp.pl?gene=H2BC18</a>     |
| NCAPG2   | Condensin II Complex Subunit G2                  | Protein Coding | 39 | GC07M158631 | 2.618309 | <a href="https://www.genecards.org/cgi-bin/carddisp.pl?gene=NCAPG2">https://www.genecards.org/cgi-bin/carddisp.pl?gene=NCAPG2</a>     |
| CCNB2    | Cyclin B2                                        | Protein Coding | 45 | GC15P059105 | 2.618125 | <a href="https://www.genecards.org/cgi-bin/carddisp.pl?gene=CCNB2">https://www.genecards.org/cgi-bin/carddisp.pl?gene=CCNB2</a>       |
| PLEKHM2  | Pleckstrin Homology And RUN Domain Containing M2 | Protein Coding | 36 | GC01P015694 | 2.61637  | <a href="https://www.genecards.org/cgi-bin/carddisp.pl?gene=PLEKHM2">https://www.genecards.org/cgi-bin/carddisp.pl?gene=PLEKHM2</a>   |
| ZNF318   | Zinc Finger Protein 318                          | Protein Coding | 37 | GC06M047133 | 2.613955 | <a href="https://www.genecards.org/cgi-bin/carddisp.pl?gene=ZNF318">https://www.genecards.org/cgi-bin/carddisp.pl?gene=ZNF318</a>     |
| FOXL1    | Forkhead Box L1                                  | Protein Coding | 38 | GC16P086576 | 2.610366 | <a href="https://www.genecards.org/cgi-bin/carddisp.pl?gene=FOXL1">https://www.genecards.org/cgi-bin/carddisp.pl?gene=FOXL1</a>       |
| MIR6090  | MicroRNA 6090                                    | RNA Gene       | 10 | GC11P128522 | 2.609474 | <a href="https://www.genecards.org/cgi-bin/carddisp.pl?gene=MIR6090">https://www.genecards.org/cgi-bin/carddisp.pl?gene=MIR6090</a>   |
| SLC2A8   | Solute Carrier Family 2 Member 8                 | Protein Coding | 40 | GC09P127398 | 2.607051 | <a href="https://www.genecards.org/cgi-bin/carddisp.pl?gene=SLC2A8">https://www.genecards.org/cgi-bin/carddisp.pl?gene=SLC2A8</a>     |
| CYB5RL   | Cytochrome B5 Reductase Like                     | Protein Coding | 30 | GC01M054172 | 2.604855 | <a href="https://www.genecards.org/cgi-bin/carddisp.pl?gene=CYB5RL">https://www.genecards.org/cgi-bin/carddisp.pl?gene=CYB5RL</a>     |
| S100A14  | S100 Calcium Binding Protein A14                 | Protein Coding | 38 | GC01M153614 | 2.60359  | <a href="https://www.genecards.org/cgi-bin/carddisp.pl?gene=S100A14">https://www.genecards.org/cgi-bin/carddisp.pl?gene=S100A14</a>   |
| IL36B    | Interleukin 36 Beta                              | Protein Coding | 35 | GC02M113022 | 2.602809 | <a href="https://www.genecards.org/cgi-bin/carddisp.pl?gene=IL36B">https://www.genecards.org/cgi-bin/carddisp.pl?gene=IL36B</a>       |
| ETS1-AS1 | ETS1 Antisense RNA 1                             | RNA Gene       | 11 | GC11P128527 | 2.595277 | <a href="https://www.genecards.org/cgi-bin/carddisp.pl?gene=ETS1-AS1">https://www.genecards.org/cgi-bin/carddisp.pl?gene=ETS1-AS1</a> |
| PPP4C    | Phosphatase 4 Catalytic Subunit                  | Protein Coding | 46 | GC16P032401 | 2.591996 | <a href="https://www.genecards.org/cgi-bin/carddisp.pl?gene=PPP4C">https://www.genecards.org/cgi-bin/carddisp.pl?gene=PPP4C</a>       |
| RALGDS   | Ral Guanine Nucleotide Dissociation Stimulator   | Protein Coding | 43 | GC09M133097 | 2.586136 | <a href="https://www.genecards.org/cgi-bin/carddisp.pl?gene=RALGDS">https://www.genecards.org/cgi-bin/carddisp.pl?gene=RALGDS</a>     |
| BTN2A2   | Butyrophilin Subfamily 2 Member A2               | Protein Coding | 37 | GC06P026382 | 2.585892 | <a href="https://www.genecards.org/cgi-bin/carddisp.pl?gene=BTN2A2">https://www.genecards.org/cgi-bin/carddisp.pl?gene=BTN2A2</a>     |
| DGKI     | Diacylglycerol Kinase Iota                       | Protein Coding | 43 | GC07M137381 | 2.582622 | <a href="https://www.genecards.org/cgi-bin/carddisp.pl?gene=DGKI">https://www.genecards.org/cgi-bin/carddisp.pl?gene=DGKI</a>         |
| INPP4B   | Inositol Polyphosphate -4- Phosphatase Type II B | Protein Coding | 39 | GC04M142023 | 2.581787 | <a href="https://www.genecards.org/cgi-bin/carddisp.pl?gene=INPP4B">https://www.genecards.org/cgi-bin/carddisp.pl?gene=INPP4B</a>     |
| TWF1     | Twinfilin Actin Binding Protein 1                | Protein Coding | 39 | GC12M043793 | 2.580847 | <a href="https://www.genecards.org/cgi-bin/carddisp.pl?gene=TWF1">https://www.genecards.org/cgi-bin/carddisp.pl?gene=TWF1</a>         |
| TASP1    | Taspase 1                                        | Protein Coding | 38 | GC20M013105 | 2.579393 | <a href="https://www.genecards.org/cgi-bin/carddisp.pl?gene=TASP1">https://www.genecards.org/cgi-bin/carddisp.pl?gene=TASP1</a>       |
| DGKZ     | Diacylglycerol Kinase Zeta                       | Protein Coding | 45 | GC11P046332 | 2.577645 | <a href="https://www.genecards.org/cgi-bin/carddisp.pl?gene=DGKZ">https://www.genecards.org/cgi-bin/carddisp.pl?gene=DGKZ</a>         |

|          |                                                             |                |    |             |          |                                                                                                                                       |
|----------|-------------------------------------------------------------|----------------|----|-------------|----------|---------------------------------------------------------------------------------------------------------------------------------------|
| OSBPL8   | Oxysterol Binding Protein Like 8                            | Protein Coding | 38 | GC12M076354 | 2.577201 | <a href="https://www.genecards.org/cgi-bin/carddisp.pl?gene=OSBPL8">https://www.genecards.org/cgi-bin/carddisp.pl?gene=OSBPL8</a>     |
| A2MP1    | Alpha-2-Macroglobulin Pseudogene 1                          | Pseudogene     | 13 | GC12M009228 | 2.573188 | <a href="https://www.genecards.org/cgi-bin/carddisp.pl?gene=A2MP1">https://www.genecards.org/cgi-bin/carddisp.pl?gene=A2MP1</a>       |
| CYB5R1   | Cytochrome B5 Reductase 1                                   | Protein Coding | 42 | GC01M202964 | 2.569713 | <a href="https://www.genecards.org/cgi-bin/carddisp.pl?gene=CYB5R1">https://www.genecards.org/cgi-bin/carddisp.pl?gene=CYB5R1</a>     |
| LPAR2    | Lysophosphatidic Acid Receptor 2                            | Protein Coding | 45 | GC19M019624 | 2.568109 | <a href="https://www.genecards.org/cgi-bin/carddisp.pl?gene=LPAR2">https://www.genecards.org/cgi-bin/carddisp.pl?gene=LPAR2</a>       |
| NMB      | Neuromedin B                                                | Protein Coding | 42 | GC15M084655 | 2.568079 | <a href="https://www.genecards.org/cgi-bin/carddisp.pl?gene=NMB">https://www.genecards.org/cgi-bin/carddisp.pl?gene=NMB</a>           |
| HIC2     | HIC ZBTB Transcriptional Repressor 2                        | Protein Coding | 36 | GC22P026481 | 2.567751 | <a href="https://www.genecards.org/cgi-bin/carddisp.pl?gene=HIC2">https://www.genecards.org/cgi-bin/carddisp.pl?gene=HIC2</a>         |
| LYPLAL1  | Lysophospholipase Like 1                                    | Protein Coding | 37 | GC01P219173 | 2.566895 | <a href="https://www.genecards.org/cgi-bin/carddisp.pl?gene=LYPLAL1">https://www.genecards.org/cgi-bin/carddisp.pl?gene=LYPLAL1</a>   |
| ZBED4    | Zinc Finger BED-Type Containing 4 Protein                   | Protein Coding | 34 | GC22P049853 | 2.565559 | <a href="https://www.genecards.org/cgi-bin/carddisp.pl?gene=ZBED4">https://www.genecards.org/cgi-bin/carddisp.pl?gene=ZBED4</a>       |
| PPP1R14C | Phosphatase 1 Regulatory Inhibitor Subunit 14C              | Protein Coding | 38 | GC06P150143 | 2.564817 | <a href="https://www.genecards.org/cgi-bin/carddisp.pl?gene=PPP1R14C">https://www.genecards.org/cgi-bin/carddisp.pl?gene=PPP1R14C</a> |
| PLSCR3   | Phospholipid Scramblase 3                                   | Protein Coding | 38 | GC17M007389 | 2.563215 | <a href="https://www.genecards.org/cgi-bin/carddisp.pl?gene=PLSCR3">https://www.genecards.org/cgi-bin/carddisp.pl?gene=PLSCR3</a>     |
| EDEM2    | ER Degradation Enhancing Alpha-Mannosidase Like Protein 2   | Protein Coding | 41 | GC20M035115 | 2.561573 | <a href="https://www.genecards.org/cgi-bin/carddisp.pl?gene=EDEM2">https://www.genecards.org/cgi-bin/carddisp.pl?gene=EDEM2</a>       |
| NEURL4   | Neuralized E3 Ubiquitin Protein Ligase 4                    | Protein Coding | 32 | GC17M007315 | 2.558761 | <a href="https://www.genecards.org/cgi-bin/carddisp.pl?gene=NEURL4">https://www.genecards.org/cgi-bin/carddisp.pl?gene=NEURL4</a>     |
| LGR6     | Leucine Rich Repeat Containing G Protein-Coupled Receptor 6 | Protein Coding | 43 | GC01P202193 | 2.555842 | <a href="https://www.genecards.org/cgi-bin/carddisp.pl?gene=LGR6">https://www.genecards.org/cgi-bin/carddisp.pl?gene=LGR6</a>         |
| MPP3     | Membrane Palmitoylated Protein 3                            | Protein Coding | 39 | GC17M043800 | 2.554013 | <a href="https://www.genecards.org/cgi-bin/carddisp.pl?gene=MPP3">https://www.genecards.org/cgi-bin/carddisp.pl?gene=MPP3</a>         |
| CCSER1   | Coiled-Coil Serine Rich Protein 1                           | Protein Coding | 31 | GC04P090127 | 2.550223 | <a href="https://www.genecards.org/cgi-bin/carddisp.pl?gene=CCSER1">https://www.genecards.org/cgi-bin/carddisp.pl?gene=CCSER1</a>     |
| CYP4Z1   | Cytochrome P450 Family 4 Subfamily Z Member 1               | Protein Coding | 36 | GC01P047067 | 2.545819 | <a href="https://www.genecards.org/cgi-bin/carddisp.pl?gene=CYP4Z1">https://www.genecards.org/cgi-bin/carddisp.pl?gene=CYP4Z1</a>     |

|           |                                                                   |                |    |             |          |                                                                                                                                         |
|-----------|-------------------------------------------------------------------|----------------|----|-------------|----------|-----------------------------------------------------------------------------------------------------------------------------------------|
| ERCC6L    | ERCC Excision Repair 6 Like, Spindle Assembly Checkpoint Helicase | Protein Coding | 37 | GC0XM072204 | 2.543537 | <a href="https://www.genecards.org/cgi-bin/carddisp.pl?gene=ERCC6L">https://www.genecards.org/cgi-bin/carddisp.pl?gene=ERCC6L</a>       |
| H3C13     | H3 Clustered Histone 13                                           | Protein Coding | 26 | GC01M150118 | 2.538886 | <a href="https://www.genecards.org/cgi-bin/carddisp.pl?gene=H3C13">https://www.genecards.org/cgi-bin/carddisp.pl?gene=H3C13</a>         |
| SH3BGRL2  | SH3 Domain Binding Glutamate Rich Protein Like 2                  | Protein Coding | 36 | GC06P079543 | 2.538296 | <a href="https://www.genecards.org/cgi-bin/carddisp.pl?gene=SH3BGRL2">https://www.genecards.org/cgi-bin/carddisp.pl?gene=SH3BGRL2</a>   |
| H2BC13    | H2B Clustered Histone 13 Coiled-Coil Domain                       | Protein Coding | 27 | GC06M046624 | 2.536497 | <a href="https://www.genecards.org/cgi-bin/carddisp.pl?gene=H2BC13">https://www.genecards.org/cgi-bin/carddisp.pl?gene=H2BC13</a>       |
| CCDC71L   | Containing 71 Like                                                | Protein Coding | 28 | GC07M106656 | 2.532596 | <a href="https://www.genecards.org/cgi-bin/carddisp.pl?gene=CCDC71L">https://www.genecards.org/cgi-bin/carddisp.pl?gene=CCDC71L</a>     |
| CDCP1     | CUB Domain Containing Protein 1                                   | Protein Coding | 39 | GC03M045082 | 2.531418 | <a href="https://www.genecards.org/cgi-bin/carddisp.pl?gene=CDCP1">https://www.genecards.org/cgi-bin/carddisp.pl?gene=CDCP1</a>         |
| WDR82     | WD Repeat Domain 82                                               | Protein Coding | 37 | GC03M052254 | 2.530725 | <a href="https://www.genecards.org/cgi-bin/carddisp.pl?gene=WDR82">https://www.genecards.org/cgi-bin/carddisp.pl?gene=WDR82</a>         |
| ATG9A     | Autophagy Related 9A                                              | Protein Coding | 40 | GC02M219219 | 2.527238 | <a href="https://www.genecards.org/cgi-bin/carddisp.pl?gene=ATG9A">https://www.genecards.org/cgi-bin/carddisp.pl?gene=ATG9A</a>         |
| CRACD     | Capping Protein Inhibiting Regulator Of Actin Dynamics            | Protein Coding | 24 | GC04P056050 | 2.525075 | <a href="https://www.genecards.org/cgi-bin/carddisp.pl?gene=CRACD">https://www.genecards.org/cgi-bin/carddisp.pl?gene=CRACD</a>         |
| MYO1F     | Myosin IF                                                         | Protein Coding | 38 | GC19M008520 | 2.52281  | <a href="https://www.genecards.org/cgi-bin/carddisp.pl?gene=MYO1F">https://www.genecards.org/cgi-bin/carddisp.pl?gene=MYO1F</a>         |
| ZNF44     | Zinc Finger Protein 44                                            | Protein Coding | 37 | GC19M012224 | 2.52252  | <a href="https://www.genecards.org/cgi-bin/carddisp.pl?gene=ZNF44">https://www.genecards.org/cgi-bin/carddisp.pl?gene=ZNF44</a>         |
| FAIM      | Fas Apoptotic Inhibitory Molecule                                 | Protein Coding | 40 | GC03P138608 | 2.515892 | <a href="https://www.genecards.org/cgi-bin/carddisp.pl?gene=FAIM">https://www.genecards.org/cgi-bin/carddisp.pl?gene=FAIM</a>           |
| SUSD2     | Sushi Domain Containing 2                                         | Protein Coding | 36 | GC22P024181 | 2.513223 | <a href="https://www.genecards.org/cgi-bin/carddisp.pl?gene=SUSD2">https://www.genecards.org/cgi-bin/carddisp.pl?gene=SUSD2</a>         |
| JDP2      | Jun Dimerization Protein 2                                        | Protein Coding | 41 | GC14P075427 | 2.511678 | <a href="https://www.genecards.org/cgi-bin/carddisp.pl?gene=JDP2">https://www.genecards.org/cgi-bin/carddisp.pl?gene=JDP2</a>           |
| ME2       | Malic Enzyme 2                                                    | Protein Coding | 45 | GC18P050879 | 2.511422 | <a href="https://www.genecards.org/cgi-bin/carddisp.pl?gene=ME2">https://www.genecards.org/cgi-bin/carddisp.pl?gene=ME2</a>             |
| CTU1      | Cytosolic Thiouridylase Subunit 1                                 | Protein Coding | 35 | GC19M051097 | 2.507203 | <a href="https://www.genecards.org/cgi-bin/carddisp.pl?gene=CTU1">https://www.genecards.org/cgi-bin/carddisp.pl?gene=CTU1</a>           |
| STOML2    | Stomatin Like 2                                                   | Protein Coding | 39 | GC09M035099 | 2.503873 | <a href="https://www.genecards.org/cgi-bin/carddisp.pl?gene=STOML2">https://www.genecards.org/cgi-bin/carddisp.pl?gene=STOML2</a>       |
| SNRPB2    | Small Nuclear Ribonucleoprotein Polypeptide B2                    | Protein Coding | 38 | GC20P016730 | 2.503085 | <a href="https://www.genecards.org/cgi-bin/carddisp.pl?gene=SNRPB2">https://www.genecards.org/cgi-bin/carddisp.pl?gene=SNRPB2</a>       |
| RNU6-961P | RNA, U6 Small Nuclear 961, Pseudogene                             | Pseudogene     | 8  | GC02P020175 | 2.502647 | <a href="https://www.genecards.org/cgi-bin/carddisp.pl?gene=RNU6-961P">https://www.genecards.org/cgi-bin/carddisp.pl?gene=RNU6-961P</a> |

|                 |                                                      |                |    |             |          |                                                                                                                                                     |
|-----------------|------------------------------------------------------|----------------|----|-------------|----------|-----------------------------------------------------------------------------------------------------------------------------------------------------|
| SUMO2           | Small Ubiquitin Like Modifier 2                      | Protein Coding | 40 | GC17M075165 | 2.498737 | <a href="https://www.genecards.org/cgi-bin/carddisp.pl?gene=SUMO2">https://www.genecards.org/cgi-bin/carddisp.pl?gene=SUMO2</a>                     |
| ZNF106          | Zinc Finger Protein 106                              | Protein Coding | 35 | GC15M042412 | 2.497016 | <a href="https://www.genecards.org/cgi-bin/carddisp.pl?gene=ZNF106">https://www.genecards.org/cgi-bin/carddisp.pl?gene=ZNF106</a>                   |
| MIR7-3          | MicroRNA 7-3                                         | RNA Gene       | 17 | GC19P004770 | 2.496814 | <a href="https://www.genecards.org/cgi-bin/carddisp.pl?gene=MIR7-3">https://www.genecards.org/cgi-bin/carddisp.pl?gene=MIR7-3</a>                   |
| PRDM14          | PR/SET Domain 14<br>ADP                              | Protein Coding | 40 | GC08M070063 | 2.496771 | <a href="https://www.genecards.org/cgi-bin/carddisp.pl?gene=PRDM14">https://www.genecards.org/cgi-bin/carddisp.pl?gene=PRDM14</a>                   |
| ARL14           | Ribosylation Factor Like GTPase 14                   | Protein Coding | 31 | GC03P160677 | 2.492559 | <a href="https://www.genecards.org/cgi-bin/carddisp.pl?gene=ARL14">https://www.genecards.org/cgi-bin/carddisp.pl?gene=ARL14</a>                     |
| H2AC21          | H2A Clustered Histone 21                             | Protein Coding | 27 | GC01M150139 | 2.485057 | <a href="https://www.genecards.org/cgi-bin/carddisp.pl?gene=H2AC21">https://www.genecards.org/cgi-bin/carddisp.pl?gene=H2AC21</a>                   |
| HCAR1           | Hydroxycarboxylic Acid Receptor 1                    | Protein Coding | 38 | GC12M122726 | 2.481189 | <a href="https://www.genecards.org/cgi-bin/carddisp.pl?gene=HCAR1">https://www.genecards.org/cgi-bin/carddisp.pl?gene=HCAR1</a>                     |
| SUMO3           | Small Ubiquitin Like Modifier 3                      | Protein Coding | 43 | GC21M044805 | 2.481158 | <a href="https://www.genecards.org/cgi-bin/carddisp.pl?gene=SUMO3">https://www.genecards.org/cgi-bin/carddisp.pl?gene=SUMO3</a>                     |
| ENSG00000231992 |                                                      | RNA Gene       | 8  | GC01P095120 | 2.478649 | <a href="https://www.genecards.org/cgi-bin/carddisp.pl?gene=ENSG00000231992">https://www.genecards.org/cgi-bin/carddisp.pl?gene=ENSG00000231992</a> |
| LSM1            | LSM1 Homolog, MRNA Degradation Associated Strawberry | Protein Coding | 40 | GC08M038163 | 2.477331 | <a href="https://www.genecards.org/cgi-bin/carddisp.pl?gene=LSM1">https://www.genecards.org/cgi-bin/carddisp.pl?gene=LSM1</a>                       |
| SBNO1           | Notch Homolog 1                                      | Protein Coding | 36 | GC12M123289 | 2.477088 | <a href="https://www.genecards.org/cgi-bin/carddisp.pl?gene=SBNO1">https://www.genecards.org/cgi-bin/carddisp.pl?gene=SBNO1</a>                     |
| ETNPPL          | Ethanolamine-Phosphate Phospho-Lyase                 | Protein Coding | 36 | GC04M108742 | 2.476469 | <a href="https://www.genecards.org/cgi-bin/carddisp.pl?gene=ETNPPL">https://www.genecards.org/cgi-bin/carddisp.pl?gene=ETNPPL</a>                   |
| RTKN2           | Rhotekin 2                                           | Protein Coding | 36 | GC10M062183 | 2.4759   | <a href="https://www.genecards.org/cgi-bin/carddisp.pl?gene=RTKN2">https://www.genecards.org/cgi-bin/carddisp.pl?gene=RTKN2</a>                     |
| LINC01684       | Long Intergenic Non-Protein Coding RNA 1684          | RNA Gene       | 9  | GC21P024306 | 2.475893 | <a href="https://www.genecards.org/cgi-bin/carddisp.pl?gene=LINC01684">https://www.genecards.org/cgi-bin/carddisp.pl?gene=LINC01684</a>             |
| INPP5A          | Inositol Polyphosphate -5-Phosphatase A Nuclear      | Protein Coding | 43 | GC10P132537 | 2.4723   | <a href="https://www.genecards.org/cgi-bin/carddisp.pl?gene=INPP5A">https://www.genecards.org/cgi-bin/carddisp.pl?gene=INPP5A</a>                   |
| NR2E1           | Receptor Subfamily 2 Group E Member 1                | Protein Coding | 44 | GC06P108166 | 2.468215 | <a href="https://www.genecards.org/cgi-bin/carddisp.pl?gene=NR2E1">https://www.genecards.org/cgi-bin/carddisp.pl?gene=NR2E1</a>                     |
| LINC01354       | Long Intergenic Non-Protein Coding RNA 1354          | RNA Gene       | 12 | GC01M234528 | 2.466466 | <a href="https://www.genecards.org/cgi-bin/carddisp.pl?gene=LINC01354">https://www.genecards.org/cgi-bin/carddisp.pl?gene=LINC01354</a>             |

|                  |                                                                                   |                   |    |                 |          |                                                                                                                                               |
|------------------|-----------------------------------------------------------------------------------|-------------------|----|-----------------|----------|-----------------------------------------------------------------------------------------------------------------------------------------------|
| C1orf105         | Chromosome 1<br>Open Reading<br>Frame 105                                         | Protein<br>Coding | 32 | GC01P1724<br>19 | 2.466349 | <a href="https://www.genecards.org/cgi-bin/carddisp.pl?gene=C1orf105">https://www.genecards.org/cgi-bin/carddisp.pl?gene=C1orf105</a>         |
| REPIN1           | Replication<br>Initiator 1                                                        | Protein<br>Coding | 34 | GC07P1503<br>68 | 2.465403 | <a href="https://www.genecards.org/cgi-bin/carddisp.pl?gene=REPIN1">https://www.genecards.org/cgi-bin/carddisp.pl?gene=REPIN1</a>             |
| REG1B            | Regenerating<br>Family Member<br>1 Beta                                           | Protein<br>Coding | 39 | GC02M079<br>086 | 2.464712 | <a href="https://www.genecards.org/cgi-bin/carddisp.pl?gene=REG1B">https://www.genecards.org/cgi-bin/carddisp.pl?gene=REG1B</a>               |
| ARL2BPP6         | ADP<br>Ribosylation<br>Factor Like<br>GTPase 2<br>Binding Protein<br>Pseudogene 6 | Pseudoge<br>ne    | 6  | GC05P1752<br>90 | 2.462798 | <a href="https://www.genecards.org/cgi-bin/carddisp.pl?gene=ARL2BPP6">https://www.genecards.org/cgi-bin/carddisp.pl?gene=ARL2BPP6</a>         |
| GPSM1            | G Protein<br>Signaling<br>Modulator 1                                             | Protein<br>Coding | 38 | GC09P1363<br>27 | 2.461058 | <a href="https://www.genecards.org/cgi-bin/carddisp.pl?gene=GPSM1">https://www.genecards.org/cgi-bin/carddisp.pl?gene=GPSM1</a>               |
| FNDC3B           | Fibronectin<br>Type III Domain<br>Containing 3B                                   | Protein<br>Coding | 37 | GC03P1720<br>39 | 2.46006  | <a href="https://www.genecards.org/cgi-bin/carddisp.pl?gene=FNDC3B">https://www.genecards.org/cgi-bin/carddisp.pl?gene=FNDC3B</a>             |
| FMNL1            | Formin Like 1                                                                     | Protein<br>Coding | 37 | GC17P0452<br>22 | 2.459692 | <a href="https://www.genecards.org/cgi-bin/carddisp.pl?gene=FMNL1">https://www.genecards.org/cgi-bin/carddisp.pl?gene=FMNL1</a>               |
| SGF29            | SAGA Complex<br>Associated<br>Factor 29                                           | Protein<br>Coding | 29 | GC16P0321<br>74 | 2.459174 | <a href="https://www.genecards.org/cgi-bin/carddisp.pl?gene=SGF29">https://www.genecards.org/cgi-bin/carddisp.pl?gene=SGF29</a>               |
| GBX2             | Gastrulation<br>Brain<br>Homeobox 2                                               | Protein<br>Coding | 40 | GC02M236<br>165 | 2.458367 | <a href="https://www.genecards.org/cgi-bin/carddisp.pl?gene=GBX2">https://www.genecards.org/cgi-bin/carddisp.pl?gene=GBX2</a>                 |
| EPB41L2          | Erythrocyte<br>Membrane<br>Protein Band<br>4.1 Like 2                             | Protein<br>Coding | 40 | GC06M130<br>820 | 2.452523 | <a href="https://www.genecards.org/cgi-bin/carddisp.pl?gene=EPB41L2">https://www.genecards.org/cgi-bin/carddisp.pl?gene=EPB41L2</a>           |
| SCAMP3           | Secretory<br>Carrier<br>Membrane<br>Protein 3                                     | Protein<br>Coding | 38 | GC01M155<br>255 | 2.446948 | <a href="https://www.genecards.org/cgi-bin/carddisp.pl?gene=SCAMP3">https://www.genecards.org/cgi-bin/carddisp.pl?gene=SCAMP3</a>             |
| KRBOX4           | KRAB Box<br>Domain<br>Containing 4                                                | Protein<br>Coding | 31 | GC0XP0464<br>46 | 2.446542 | <a href="https://www.genecards.org/cgi-bin/carddisp.pl?gene=KRBOX4">https://www.genecards.org/cgi-bin/carddisp.pl?gene=KRBOX4</a>             |
| HCG18            | HLA Complex<br>Group 18<br>Zinc Finger                                            | RNA<br>Gene       | 16 | GC06M046<br>781 | 2.445027 | <a href="https://www.genecards.org/cgi-bin/carddisp.pl?gene=HCG18">https://www.genecards.org/cgi-bin/carddisp.pl?gene=HCG18</a>               |
| ZDHHC5           | DHHC-Type<br>Palmitoyltransf<br>erase 5                                           | Protein<br>Coding | 37 | GC11P0576<br>70 | 2.440767 | <a href="https://www.genecards.org/cgi-bin/carddisp.pl?gene=ZDHHC5">https://www.genecards.org/cgi-bin/carddisp.pl?gene=ZDHHC5</a>             |
| PFDN1            | Prefoldin<br>Subunit 1                                                            | Protein<br>Coding | 39 | GC05M140<br>263 | 2.438779 | <a href="https://www.genecards.org/cgi-bin/carddisp.pl?gene=PFDN1">https://www.genecards.org/cgi-bin/carddisp.pl?gene=PFDN1</a>               |
| LOC10012<br>8310 | Uncharacterize<br>d<br>LOC100128310                                               | RNA<br>Gene       | 8  | GC20M061<br>718 | 2.437192 | <a href="https://www.genecards.org/cgi-bin/carddisp.pl?gene=LOC100128310">https://www.genecards.org/cgi-bin/carddisp.pl?gene=LOC100128310</a> |
| NET1             | Neuroepithelial<br>Cell<br>Transforming 1                                         | Protein<br>Coding | 44 | GC10P0054<br>44 | 2.435443 | <a href="https://www.genecards.org/cgi-bin/carddisp.pl?gene=NET1">https://www.genecards.org/cgi-bin/carddisp.pl?gene=NET1</a>                 |

|                 |                                                 |                |    |             |          |                                                                                                                                                     |
|-----------------|-------------------------------------------------|----------------|----|-------------|----------|-----------------------------------------------------------------------------------------------------------------------------------------------------|
| PCID2           | PCI Domain Containing 2                         | Protein Coding | 34 | GC13M113167 | 2.416789 | <a href="https://www.genecards.org/cgi-bin/carddisp.pl?gene=PCID2">https://www.genecards.org/cgi-bin/carddisp.pl?gene=PCID2</a>                     |
| Inc-TM6SF2-1    |                                                 | RNA Gene       | 4  | GC19M019270 | 2.415186 | <a href="https://www.genecards.org/cgi-bin/carddisp.pl?gene=Inc-TM6SF2-1">https://www.genecards.org/cgi-bin/carddisp.pl?gene=Inc-TM6SF2-1</a>       |
| ENSG00000267629 |                                                 | RNA Gene       | 3  | GC19M019254 | 2.415186 | <a href="https://www.genecards.org/cgi-bin/carddisp.pl?gene=ENSG00000267629">https://www.genecards.org/cgi-bin/carddisp.pl?gene=ENSG00000267629</a> |
| MIR663A         | MicroRNA 663a                                   | RNA Gene       | 16 | GC20M026189 | 2.410882 | <a href="https://www.genecards.org/cgi-bin/carddisp.pl?gene=MIR663A">https://www.genecards.org/cgi-bin/carddisp.pl?gene=MIR663A</a>                 |
| ARID3B          | AT-Rich Interaction Domain 3B                   | Protein Coding | 38 | GC15P074541 | 2.406055 | <a href="https://www.genecards.org/cgi-bin/carddisp.pl?gene=ARID3B">https://www.genecards.org/cgi-bin/carddisp.pl?gene=ARID3B</a>                   |
| MAS1            | MAS1 Proto-Oncogene, G Protein-Coupled Receptor | Protein Coding | 40 | GC06P159906 | 2.395122 | <a href="https://www.genecards.org/cgi-bin/carddisp.pl?gene=MAS1">https://www.genecards.org/cgi-bin/carddisp.pl?gene=MAS1</a>                       |
| ENOX2           | Ecto-NOX Disulfide-Thiol Exchanger 2            | Protein Coding | 38 | GC0XM130623 | 2.392108 | <a href="https://www.genecards.org/cgi-bin/carddisp.pl?gene=ENOX2">https://www.genecards.org/cgi-bin/carddisp.pl?gene=ENOX2</a>                     |
| AKIP1           | A-Kinase Interacting Protein 1                  | Protein Coding | 34 | GC11P008911 | 2.390536 | <a href="https://www.genecards.org/cgi-bin/carddisp.pl?gene=AKIP1">https://www.genecards.org/cgi-bin/carddisp.pl?gene=AKIP1</a>                     |
| ME3             | Malic Enzyme 3                                  | Protein Coding | 40 | GC11M086441 | 2.389818 | <a href="https://www.genecards.org/cgi-bin/carddisp.pl?gene=ME3">https://www.genecards.org/cgi-bin/carddisp.pl?gene=ME3</a>                         |
| HSALNG0013412   |                                                 | RNA Gene       | 4  | GC02P020202 | 2.388499 | <a href="https://www.genecards.org/cgi-bin/carddisp.pl?gene=HSALNG0013412">https://www.genecards.org/cgi-bin/carddisp.pl?gene=HSALNG0013412</a>     |
| Inc-COA6-13     |                                                 | RNA Gene       | 4  | GC01P234522 | 2.388499 | <a href="https://www.genecards.org/cgi-bin/carddisp.pl?gene=Inc-COA6-13">https://www.genecards.org/cgi-bin/carddisp.pl?gene=Inc-COA6-13</a>         |
| RF00017-457     |                                                 | RNA Gene       | 3  | GC01M234512 | 2.388499 | <a href="https://www.genecards.org/cgi-bin/carddisp.pl?gene=RF00017-457">https://www.genecards.org/cgi-bin/carddisp.pl?gene=RF00017-457</a>         |
| LINC01679       | Long Intergenic Non-Protein Coding RNA 1679     | RNA Gene       | 9  | GC21M043360 | 2.385025 | <a href="https://www.genecards.org/cgi-bin/carddisp.pl?gene=LINC01679">https://www.genecards.org/cgi-bin/carddisp.pl?gene=LINC01679</a>             |
| PGS1            | Phosphatidylglycerophosphate Synthase 1         | Protein Coding | 39 | GC17P078378 | 2.383802 | <a href="https://www.genecards.org/cgi-bin/carddisp.pl?gene=PGS1">https://www.genecards.org/cgi-bin/carddisp.pl?gene=PGS1</a>                       |
| RTKN            | Rhotekin                                        | Protein Coding | 40 | GC02M074583 | 2.382032 | <a href="https://www.genecards.org/cgi-bin/carddisp.pl?gene=RTKN">https://www.genecards.org/cgi-bin/carddisp.pl?gene=RTKN</a>                       |
| CCDC170         | Coiled-Coil Domain Containing 170               | Protein Coding | 33 | GC06P151494 | 2.379334 | <a href="https://www.genecards.org/cgi-bin/carddisp.pl?gene=CCDC170">https://www.genecards.org/cgi-bin/carddisp.pl?gene=CCDC170</a>                 |
| DNASE2B         | Deoxyribonuclease 2 Beta Eukaryotic             | Protein Coding | 34 | GC01P084398 | 2.374575 | <a href="https://www.genecards.org/cgi-bin/carddisp.pl?gene=DNASE2B">https://www.genecards.org/cgi-bin/carddisp.pl?gene=DNASE2B</a>                 |
| EIF2D           | Translation Initiation Factor 2D                | Protein Coding | 33 | GC01M206571 | 2.370579 | <a href="https://www.genecards.org/cgi-bin/carddisp.pl?gene=EIF2D">https://www.genecards.org/cgi-bin/carddisp.pl?gene=EIF2D</a>                     |
| MIR637          | MicroRNA 637                                    | RNA Gene       | 16 | GC19M003961 | 2.369391 | <a href="https://www.genecards.org/cgi-bin/carddisp.pl?gene=MIR637">https://www.genecards.org/cgi-bin/carddisp.pl?gene=MIR637</a>                   |

|             |                                                            |                |    |             |          |                                                                                                                                             |
|-------------|------------------------------------------------------------|----------------|----|-------------|----------|---------------------------------------------------------------------------------------------------------------------------------------------|
| LOC389199   | Uncharacterized LOC389199                                  | Protein Coding | 17 | GC04P007939 | 2.365835 | <a href="https://www.genecards.org/cgi-bin/carddisp.pl?gene=LOC389199">https://www.genecards.org/cgi-bin/carddisp.pl?gene=LOC389199</a>     |
| KCNJ4       | Potassium Inwardly Rectifying Channel Subfamily J Member 4 | Protein Coding | 45 | GC22M038426 | 2.361508 | <a href="https://www.genecards.org/cgi-bin/carddisp.pl?gene=KCNJ4">https://www.genecards.org/cgi-bin/carddisp.pl?gene=KCNJ4</a>             |
| BCAS2       | BCAS2 Pre-mRNA Processing Factor                           | Protein Coding | 38 | GC01M114567 | 2.349597 | <a href="https://www.genecards.org/cgi-bin/carddisp.pl?gene=BCAS2">https://www.genecards.org/cgi-bin/carddisp.pl?gene=BCAS2</a>             |
| SEMA4C      | Semaphorin 4C                                              | Protein Coding | 38 | GC02M096859 | 2.341803 | <a href="https://www.genecards.org/cgi-bin/carddisp.pl?gene=SEMA4C">https://www.genecards.org/cgi-bin/carddisp.pl?gene=SEMA4C</a>           |
| RHNO1       | RAD9-HUS1-RAD1 Interacting Nuclear Orphan 1                | Protein Coding | 30 | GC12P002876 | 2.338134 | <a href="https://www.genecards.org/cgi-bin/carddisp.pl?gene=RHNO1">https://www.genecards.org/cgi-bin/carddisp.pl?gene=RHNO1</a>             |
| SNUPN       | Snurportin 1                                               | Protein Coding | 37 | GC15M075598 | 2.337207 | <a href="https://www.genecards.org/cgi-bin/carddisp.pl?gene=SNUPN">https://www.genecards.org/cgi-bin/carddisp.pl?gene=SNUPN</a>             |
| HOPX        | HOP Homeobox                                               | Protein Coding | 37 | GC04M056647 | 2.336192 | <a href="https://www.genecards.org/cgi-bin/carddisp.pl?gene=HOPX">https://www.genecards.org/cgi-bin/carddisp.pl?gene=HOPX</a>               |
| Inc-TRIB1-7 |                                                            | RNA Gene       | 4  | GC08P125495 | 2.335687 | <a href="https://www.genecards.org/cgi-bin/carddisp.pl?gene=Inc-TRIB1-7">https://www.genecards.org/cgi-bin/carddisp.pl?gene=Inc-TRIB1-7</a> |
| CTDNEP1     | CTD Nuclear Envelope Phosphatase 1                         | Protein Coding | 36 | GC17M007243 | 2.334201 | <a href="https://www.genecards.org/cgi-bin/carddisp.pl?gene=CTDNEP1">https://www.genecards.org/cgi-bin/carddisp.pl?gene=CTDNEP1</a>         |
| ERI1        | Exoribonuclease 1                                          | Protein Coding | 38 | GC08P008892 | 2.328356 | <a href="https://www.genecards.org/cgi-bin/carddisp.pl?gene=ERI1">https://www.genecards.org/cgi-bin/carddisp.pl?gene=ERI1</a>               |
| NPTXR       | Neuronal Pentraxin Receptor                                | Protein Coding | 40 | GC22M038818 | 2.319512 | <a href="https://www.genecards.org/cgi-bin/carddisp.pl?gene=NPTXR">https://www.genecards.org/cgi-bin/carddisp.pl?gene=NPTXR</a>             |
| SNHG7       | Small Nucleolar RNA Host Gene 7                            | RNA Gene       | 20 | GC09M136821 | 2.315902 | <a href="https://www.genecards.org/cgi-bin/carddisp.pl?gene=SNHG7">https://www.genecards.org/cgi-bin/carddisp.pl?gene=SNHG7</a>             |
| ESYT2       | Extended Synaptotagmin 2                                   | Protein Coding | 36 | GC07M158730 | 2.312063 | <a href="https://www.genecards.org/cgi-bin/carddisp.pl?gene=ESYT2">https://www.genecards.org/cgi-bin/carddisp.pl?gene=ESYT2</a>             |
| MRPS21      | Mitochondrial Ribosomal Protein S21                        | Protein Coding | 37 | GC01P150294 | 2.305032 | <a href="https://www.genecards.org/cgi-bin/carddisp.pl?gene=MRPS21">https://www.genecards.org/cgi-bin/carddisp.pl?gene=MRPS21</a>           |
| MIR194-1    | MicroRNA 194-1                                             | RNA Gene       | 16 | GC01M220118 | 2.304888 | <a href="https://www.genecards.org/cgi-bin/carddisp.pl?gene=MIR194-1">https://www.genecards.org/cgi-bin/carddisp.pl?gene=MIR194-1</a>       |
| EFHD2       | EF-Hand Domain Family Member D2                            | Protein Coding | 36 | GC01P015409 | 2.301093 | <a href="https://www.genecards.org/cgi-bin/carddisp.pl?gene=EFHD2">https://www.genecards.org/cgi-bin/carddisp.pl?gene=EFHD2</a>             |
| ZNF300      | Zinc Finger Protein 300                                    | Protein Coding | 37 | GC05M150894 | 2.30036  | <a href="https://www.genecards.org/cgi-bin/carddisp.pl?gene=ZNF300">https://www.genecards.org/cgi-bin/carddisp.pl?gene=ZNF300</a>           |
| H1-3        | H1.3 Linker Histone, Cluster Member                        | Protein Coding | 30 | GC06M047205 | 2.298678 | <a href="https://www.genecards.org/cgi-bin/carddisp.pl?gene=H1-3">https://www.genecards.org/cgi-bin/carddisp.pl?gene=H1-3</a>               |
| APOL3       | Apolipoprotein L3                                          | Protein Coding | 37 | GC22M036140 | 2.297211 | <a href="https://www.genecards.org/cgi-bin/carddisp.pl?gene=APOL3">https://www.genecards.org/cgi-bin/carddisp.pl?gene=APOL3</a>             |



|           |                                             |                |    |             |          |                                                                                                                                         |
|-----------|---------------------------------------------|----------------|----|-------------|----------|-----------------------------------------------------------------------------------------------------------------------------------------|
| MED6      | Mediator Complex Subunit 6                  | Protein Coding | 38 | GC14M070581 | 2.295582 | <a href="https://www.genecards.org/cgi-bin/carddisp.pl?gene=MED6">https://www.genecards.org/cgi-bin/carddisp.pl?gene=MED6</a>           |
| CLGN      | Calmegin                                    | Protein Coding | 37 | GC04M140388 | 2.295215 | <a href="https://www.genecards.org/cgi-bin/carddisp.pl?gene=CLGN">https://www.genecards.org/cgi-bin/carddisp.pl?gene=CLGN</a>           |
| HOXA5     | Homeobox A5                                 | Protein Coding | 42 | GC07M027142 | 2.294472 | <a href="https://www.genecards.org/cgi-bin/carddisp.pl?gene=HOXA5">https://www.genecards.org/cgi-bin/carddisp.pl?gene=HOXA5</a>         |
| TNFAIP8   | TNF Alpha Induced Protein 8                 | Protein Coding | 38 | GC05P119268 | 2.293043 | <a href="https://www.genecards.org/cgi-bin/carddisp.pl?gene=TNFAIP8">https://www.genecards.org/cgi-bin/carddisp.pl?gene=TNFAIP8</a>     |
| KIF15     | Kinesin Family Member 15                    | Protein Coding | 37 | GC03P045589 | 2.291771 | <a href="https://www.genecards.org/cgi-bin/carddisp.pl?gene=KIF15">https://www.genecards.org/cgi-bin/carddisp.pl?gene=KIF15</a>         |
| TMEM18    | Transmembrane Protein 18                    | Protein Coding | 36 | GC02M000660 | 2.289251 | <a href="https://www.genecards.org/cgi-bin/carddisp.pl?gene=TMEM18">https://www.genecards.org/cgi-bin/carddisp.pl?gene=TMEM18</a>       |
| SSX2IP    | SSX Family Member 2 Interacting Protein     | Protein Coding | 37 | GC01M084643 | 2.286052 | <a href="https://www.genecards.org/cgi-bin/carddisp.pl?gene=SSX2IP">https://www.genecards.org/cgi-bin/carddisp.pl?gene=SSX2IP</a>       |
| ABTB2     | Ankyrin Repeat And BTB Domain Containing 2  | Protein Coding | 33 | GC11M034129 | 2.2856   | <a href="https://www.genecards.org/cgi-bin/carddisp.pl?gene=ABTB2">https://www.genecards.org/cgi-bin/carddisp.pl?gene=ABTB2</a>         |
| FECHP1    | Ferrochelatase Pseudogene 1                 | Pseudogene     | 6  | GC03P034873 | 2.277014 | <a href="https://www.genecards.org/cgi-bin/carddisp.pl?gene=FECHP1">https://www.genecards.org/cgi-bin/carddisp.pl?gene=FECHP1</a>       |
| CLEC4A    | C-Type Lectin Domain Family 4 Member A      | Protein Coding | 38 | GC12P011898 | 2.276155 | <a href="https://www.genecards.org/cgi-bin/carddisp.pl?gene=CLEC4A">https://www.genecards.org/cgi-bin/carddisp.pl?gene=CLEC4A</a>       |
| LINC00322 | Long Intergenic Non-Protein Coding RNA 322  | RNA Gene       | 17 | GC21M043322 | 2.275914 | <a href="https://www.genecards.org/cgi-bin/carddisp.pl?gene=LINC00322">https://www.genecards.org/cgi-bin/carddisp.pl?gene=LINC00322</a> |
| MIR498    | MicroRNA 498                                | RNA Gene       | 16 | GC19P056363 | 2.275613 | <a href="https://www.genecards.org/cgi-bin/carddisp.pl?gene=MIR498">https://www.genecards.org/cgi-bin/carddisp.pl?gene=MIR498</a>       |
| TINAGL1   | Tubulointerstitial Nephritis Antigen Like 1 | Protein Coding | 39 | GC01P031576 | 2.274616 | <a href="https://www.genecards.org/cgi-bin/carddisp.pl?gene=TINAGL1">https://www.genecards.org/cgi-bin/carddisp.pl?gene=TINAGL1</a>     |
| CENPM     | Centromere Protein M                        | Protein Coding | 36 | GC22M048546 | 2.273905 | <a href="https://www.genecards.org/cgi-bin/carddisp.pl?gene=CENPM">https://www.genecards.org/cgi-bin/carddisp.pl?gene=CENPM</a>         |
| MIR1-1    | MicroRNA 1-1                                | RNA Gene       | 19 | GC20P062994 | 2.27276  | <a href="https://www.genecards.org/cgi-bin/carddisp.pl?gene=MIR1-1">https://www.genecards.org/cgi-bin/carddisp.pl?gene=MIR1-1</a>       |
| CCDC186   | Coiled-Coil Domain Containing 186           | Protein Coding | 29 | GC10M114120 | 2.270911 | <a href="https://www.genecards.org/cgi-bin/carddisp.pl?gene=CCDC186">https://www.genecards.org/cgi-bin/carddisp.pl?gene=CCDC186</a>     |
| NOP16     | NOP16 Nucleolar Protein                     | Protein Coding | 33 | GC05M176383 | 2.26935  | <a href="https://www.genecards.org/cgi-bin/carddisp.pl?gene=NOP16">https://www.genecards.org/cgi-bin/carddisp.pl?gene=NOP16</a>         |
| FNBP4     | Formin Binding Protein 4                    | Protein Coding | 36 | GC11M069009 | 2.267901 | <a href="https://www.genecards.org/cgi-bin/carddisp.pl?gene=FNBP4">https://www.genecards.org/cgi-bin/carddisp.pl?gene=FNBP4</a>         |
| ROMO1     | Reactive Oxygen Species Modulator 1         | Protein Coding | 33 | GC20P035699 | 2.267346 | <a href="https://www.genecards.org/cgi-bin/carddisp.pl?gene=ROMO1">https://www.genecards.org/cgi-bin/carddisp.pl?gene=ROMO1</a>         |
| HOXC10    | Homeobox C10                                | Protein Coding | 37 | GC12P054365 | 2.266742 | <a href="https://www.genecards.org/cgi-bin/carddisp.pl?gene=HOXC10">https://www.genecards.org/cgi-bin/carddisp.pl?gene=HOXC10</a>       |

|                 |                                                    |                |    |             |          |                                                                                                                                                     |
|-----------------|----------------------------------------------------|----------------|----|-------------|----------|-----------------------------------------------------------------------------------------------------------------------------------------------------|
| IPO13           | Importin 13                                        | Protein Coding | 38 | GC01P043947 | 2.264948 | <a href="https://www.genecards.org/cgi-bin/carddisp.pl?gene=IPO13">https://www.genecards.org/cgi-bin/carddisp.pl?gene=IPO13</a>                     |
| LTB4R2          | Leukotriene B4 Receptor 2                          | Protein Coding | 43 | GC14P026323 | 2.264258 | <a href="https://www.genecards.org/cgi-bin/carddisp.pl?gene=LTB4R2">https://www.genecards.org/cgi-bin/carddisp.pl?gene=LTB4R2</a>                   |
| ENSG00000286231 |                                                    | Protein Coding | 5  | GC01P220787 | 2.263066 | <a href="https://www.genecards.org/cgi-bin/carddisp.pl?gene=ENSG00000286231">https://www.genecards.org/cgi-bin/carddisp.pl?gene=ENSG00000286231</a> |
| RNPEP           | Arginyl Aminopeptidase                             | Protein Coding | 40 | GC01P201982 | 2.261432 | <a href="https://www.genecards.org/cgi-bin/carddisp.pl?gene=RNPEP">https://www.genecards.org/cgi-bin/carddisp.pl?gene=RNPEP</a>                     |
| CDV3            | CDV3 Homolog                                       | Protein Coding | 31 | GC03P133573 | 2.261302 | <a href="https://www.genecards.org/cgi-bin/carddisp.pl?gene=CDV3">https://www.genecards.org/cgi-bin/carddisp.pl?gene=CDV3</a>                       |
| LOC644135       | Uncharacterized LOC644135                          | RNA Gene       | 11 | GC06M135856 | 2.260223 | <a href="https://www.genecards.org/cgi-bin/carddisp.pl?gene=LOC644135">https://www.genecards.org/cgi-bin/carddisp.pl?gene=LOC644135</a>             |
| IGHG4           | Immunoglobulin Heavy Constant Gamma 4 (G4m Marker) | Protein Coding | 27 | GC14M110309 | 2.255379 | <a href="https://www.genecards.org/cgi-bin/carddisp.pl?gene=IGHG4">https://www.genecards.org/cgi-bin/carddisp.pl?gene=IGHG4</a>                     |
| SLU7            | SLU7 Homolog, Splicing Factor                      | Protein Coding | 38 | GC05M160401 | 2.254393 | <a href="https://www.genecards.org/cgi-bin/carddisp.pl?gene=SLU7">https://www.genecards.org/cgi-bin/carddisp.pl?gene=SLU7</a>                       |
| LOC101928135    | Uncharacterized LOC101928135 Methyl-CpG            | RNA Gene       | 6  | GC03M034875 | 2.254169 | <a href="https://www.genecards.org/cgi-bin/carddisp.pl?gene=LOC101928135">https://www.genecards.org/cgi-bin/carddisp.pl?gene=LOC101928135</a>       |
| MBD3            | Binding Domain Protein 3                           | Protein Coding | 43 | GC19M002160 | 2.249501 | <a href="https://www.genecards.org/cgi-bin/carddisp.pl?gene=MBD3">https://www.genecards.org/cgi-bin/carddisp.pl?gene=MBD3</a>                       |
| LMAN1L          | Lectin, Mannose Binding 1 Like                     | Protein Coding | 36 | GC15P074812 | 2.248011 | <a href="https://www.genecards.org/cgi-bin/carddisp.pl?gene=LMAN1L">https://www.genecards.org/cgi-bin/carddisp.pl?gene=LMAN1L</a>                   |
| CUEDC2          | CUE Domain Containing 2                            | Protein Coding | 38 | GC10M102424 | 2.24705  | <a href="https://www.genecards.org/cgi-bin/carddisp.pl?gene=CUEDC2">https://www.genecards.org/cgi-bin/carddisp.pl?gene=CUEDC2</a>                   |
| ARPC4           | Actin Related Protein 2/3 Complex Subunit 4        | Protein Coding | 38 | GC03P009792 | 2.246302 | <a href="https://www.genecards.org/cgi-bin/carddisp.pl?gene=ARPC4">https://www.genecards.org/cgi-bin/carddisp.pl?gene=ARPC4</a>                     |
| ENSG00000287092 |                                                    | RNA Gene       | 5  | GC06M155810 | 2.244387 | <a href="https://www.genecards.org/cgi-bin/carddisp.pl?gene=ENSG00000287092">https://www.genecards.org/cgi-bin/carddisp.pl?gene=ENSG00000287092</a> |
| TEX36-AS1       | TEX36 Antisense RNA 1                              | RNA Gene       | 11 | GC10P125574 | 2.242818 | <a href="https://www.genecards.org/cgi-bin/carddisp.pl?gene=TEX36-AS1">https://www.genecards.org/cgi-bin/carddisp.pl?gene=TEX36-AS1</a>             |
| RAB14           | RAB14, Member RAS Oncogene Family                  | Protein Coding | 41 | GC09M121178 | 2.235089 | <a href="https://www.genecards.org/cgi-bin/carddisp.pl?gene=RAB14">https://www.genecards.org/cgi-bin/carddisp.pl?gene=RAB14</a>                     |
| ESYT1           | Extended Synaptotagmin 1                           | Protein Coding | 38 | GC12P056379 | 2.229225 | <a href="https://www.genecards.org/cgi-bin/carddisp.pl?gene=ESYT1">https://www.genecards.org/cgi-bin/carddisp.pl?gene=ESYT1</a>                     |
| ITGB3BP         | Integrin Subunit Beta 3 Binding Protein            | Protein Coding | 42 | GC01M063440 | 2.225029 | <a href="https://www.genecards.org/cgi-bin/carddisp.pl?gene=ITGB3BP">https://www.genecards.org/cgi-bin/carddisp.pl?gene=ITGB3BP</a>                 |

|           |                                                                 |                |    |             |          |                                                                                                                                         |
|-----------|-----------------------------------------------------------------|----------------|----|-------------|----------|-----------------------------------------------------------------------------------------------------------------------------------------|
| HSDL2     | Hydroxysteroid Dehydrogenase Like 2                             | Protein Coding | 34 | GC09P112379 | 2.224586 | <a href="https://www.genecards.org/cgi-bin/carddisp.pl?gene=HSDL2">https://www.genecards.org/cgi-bin/carddisp.pl?gene=HSDL2</a>         |
| METAP1    | Methionyl Aminopeptidase 1                                      | Protein Coding | 41 | GC04P098995 | 2.223778 | <a href="https://www.genecards.org/cgi-bin/carddisp.pl?gene=METAP1">https://www.genecards.org/cgi-bin/carddisp.pl?gene=METAP1</a>       |
| ARHGEF28  | Rho Guanine Nucleotide Exchange Factor 28                       | Protein Coding | 36 | GC05P073626 | 2.222673 | <a href="https://www.genecards.org/cgi-bin/carddisp.pl?gene=ARHGEF28">https://www.genecards.org/cgi-bin/carddisp.pl?gene=ARHGEF28</a>   |
| ANO4      | Anoctamin 4                                                     | Protein Coding | 35 | GC12P100717 | 2.221799 | <a href="https://www.genecards.org/cgi-bin/carddisp.pl?gene=ANO4">https://www.genecards.org/cgi-bin/carddisp.pl?gene=ANO4</a>           |
| MTRNR2L5  | MT-RNR2 Like 5                                                  | Protein Coding | 20 | GC10P055618 | 2.21551  | <a href="https://www.genecards.org/cgi-bin/carddisp.pl?gene=MTRNR2L5">https://www.genecards.org/cgi-bin/carddisp.pl?gene=MTRNR2L5</a>   |
| ZBTB17    | Zinc Finger And BTB Domain Containing 17                        | Protein Coding | 42 | GC01M015943 | 2.21314  | <a href="https://www.genecards.org/cgi-bin/carddisp.pl?gene=ZBTB17">https://www.genecards.org/cgi-bin/carddisp.pl?gene=ZBTB17</a>       |
| H3C10     | H3 Clustered Histone 10                                         | Protein Coding | 29 | GC06P055047 | 2.21023  | <a href="https://www.genecards.org/cgi-bin/carddisp.pl?gene=H3C10">https://www.genecards.org/cgi-bin/carddisp.pl?gene=H3C10</a>         |
| RPS6KB2   | Ribosomal Protein S6 Kinase B2                                  | Protein Coding | 47 | GC11P067428 | 2.209503 | <a href="https://www.genecards.org/cgi-bin/carddisp.pl?gene=RPS6KB2">https://www.genecards.org/cgi-bin/carddisp.pl?gene=RPS6KB2</a>     |
| MRPL33    | Mitochondrial Ribosomal Protein L33                             | Protein Coding | 33 | GC02P027772 | 2.208936 | <a href="https://www.genecards.org/cgi-bin/carddisp.pl?gene=MRPL33">https://www.genecards.org/cgi-bin/carddisp.pl?gene=MRPL33</a>       |
| SHB       | SH2 Domain Containing Adaptor Protein B                         | Protein Coding | 41 | GC09M038348 | 2.207877 | <a href="https://www.genecards.org/cgi-bin/carddisp.pl?gene=SHB">https://www.genecards.org/cgi-bin/carddisp.pl?gene=SHB</a>             |
| CCDC93    | Coiled-Coil Domain Containing 93                                | Protein Coding | 34 | GC02M117915 | 2.203646 | <a href="https://www.genecards.org/cgi-bin/carddisp.pl?gene=CCDC93">https://www.genecards.org/cgi-bin/carddisp.pl?gene=CCDC93</a>       |
| HSP90AA2P | Heat Shock Protein 90 Alpha Family Class A Member 2, Pseudogene | Pseudogene     | 19 | GC11M027888 | 2.200334 | <a href="https://www.genecards.org/cgi-bin/carddisp.pl?gene=HSP90AA2P">https://www.genecards.org/cgi-bin/carddisp.pl?gene=HSP90AA2P</a> |
| H2AC12    | H2A Clustered Histone 12                                        | Protein Coding | 28 | GC06P055578 | 2.20021  | <a href="https://www.genecards.org/cgi-bin/carddisp.pl?gene=H2AC12">https://www.genecards.org/cgi-bin/carddisp.pl?gene=H2AC12</a>       |
| SIGLEC14  | Sialic Acid Binding Ig Like Lectin 14                           | Protein Coding | 33 | GC19M051642 | 2.197856 | <a href="https://www.genecards.org/cgi-bin/carddisp.pl?gene=SIGLEC14">https://www.genecards.org/cgi-bin/carddisp.pl?gene=SIGLEC14</a>   |
| PHACTR3   | Phosphatase And Actin Regulator 3                               | Protein Coding | 37 | GC20P059577 | 2.197795 | <a href="https://www.genecards.org/cgi-bin/carddisp.pl?gene=PHACTR3">https://www.genecards.org/cgi-bin/carddisp.pl?gene=PHACTR3</a>     |
| TAS1R3    | Taste 1 Receptor Member 3                                       | Protein Coding | 40 | GC01P001331 | 2.197476 | <a href="https://www.genecards.org/cgi-bin/carddisp.pl?gene=TAS1R3">https://www.genecards.org/cgi-bin/carddisp.pl?gene=TAS1R3</a>       |
| CYTH2     | Cytohesin 2                                                     | Protein Coding | 42 | GC19P048470 | 2.196087 | <a href="https://www.genecards.org/cgi-bin/carddisp.pl?gene=CYTH2">https://www.genecards.org/cgi-bin/carddisp.pl?gene=CYTH2</a>         |
| MROH7     | Maestro Heat Like Repeat Family Member 7                        | Protein Coding | 31 | GC01P054643 | 2.192661 | <a href="https://www.genecards.org/cgi-bin/carddisp.pl?gene=MROH7">https://www.genecards.org/cgi-bin/carddisp.pl?gene=MROH7</a>         |

|                 |                                                       |                |    |             |          |                                                                                                                                                     |
|-----------------|-------------------------------------------------------|----------------|----|-------------|----------|-----------------------------------------------------------------------------------------------------------------------------------------------------|
| ODF1            | Outer Dense Fiber Of Sperm Tails 1                    | Protein Coding | 37 | GC08P102551 | 2.191673 | <a href="https://www.genecards.org/cgi-bin/carddisp.pl?gene=ODF1">https://www.genecards.org/cgi-bin/carddisp.pl?gene=ODF1</a>                       |
| H2AC17          | H2A Clustered Histone 17                              | Protein Coding | 29 | GC06M047209 | 2.190752 | <a href="https://www.genecards.org/cgi-bin/carddisp.pl?gene=H2AC17">https://www.genecards.org/cgi-bin/carddisp.pl?gene=H2AC17</a>                   |
| SEPTIN11        | Septin 11                                             | Protein Coding | 29 | GC04P076950 | 2.186701 | <a href="https://www.genecards.org/cgi-bin/carddisp.pl?gene=SEPTIN11">https://www.genecards.org/cgi-bin/carddisp.pl?gene=SEPTIN11</a>               |
| ENSG00000228852 |                                                       | RNA Gene       | 7  | GC01M095243 | 2.186076 | <a href="https://www.genecards.org/cgi-bin/carddisp.pl?gene=ENSG00000228852">https://www.genecards.org/cgi-bin/carddisp.pl?gene=ENSG00000228852</a> |
| C1orf87         | Chromosome 1 Open Reading Frame 87                    | Protein Coding | 34 | GC01M059987 | 2.185571 | <a href="https://www.genecards.org/cgi-bin/carddisp.pl?gene=C1orf87">https://www.genecards.org/cgi-bin/carddisp.pl?gene=C1orf87</a>                 |
| HMGN4           | High Mobility Group Nucleosomal Binding Domain 4      | Protein Coding | 33 | GC06P026538 | 2.181639 | <a href="https://www.genecards.org/cgi-bin/carddisp.pl?gene=HMGN4">https://www.genecards.org/cgi-bin/carddisp.pl?gene=HMGN4</a>                     |
| APOL6           | Apolipoprotein L6                                     | Protein Coding | 38 | GC22P035648 | 2.17594  | <a href="https://www.genecards.org/cgi-bin/carddisp.pl?gene=APOL6">https://www.genecards.org/cgi-bin/carddisp.pl?gene=APOL6</a>                     |
| EFNA3           | Ephrin A3                                             | Protein Coding | 45 | GC01P155078 | 2.174744 | <a href="https://www.genecards.org/cgi-bin/carddisp.pl?gene=EFNA3">https://www.genecards.org/cgi-bin/carddisp.pl?gene=EFNA3</a>                     |
| MIR302F         | MicroRNA 302f                                         | RNA Gene       | 9  | GC18P030298 | 2.174495 | <a href="https://www.genecards.org/cgi-bin/carddisp.pl?gene=MIR302F">https://www.genecards.org/cgi-bin/carddisp.pl?gene=MIR302F</a>                 |
| TSSK2           | Testis Specific Serine Kinase 2 Cyclin And CBS Domain | Protein Coding | 36 | GC22P020052 | 2.173967 | <a href="https://www.genecards.org/cgi-bin/carddisp.pl?gene=TSSK2">https://www.genecards.org/cgi-bin/carddisp.pl?gene=TSSK2</a>                     |
| CNNM3           | Divalent Metal Cation Transport Mediator 3            | Protein Coding | 38 | GC02P096815 | 2.172954 | <a href="https://www.genecards.org/cgi-bin/carddisp.pl?gene=CNNM3">https://www.genecards.org/cgi-bin/carddisp.pl?gene=CNNM3</a>                     |
| SLC22A13        | Solute Carrier Family 22 Member 13 Protein            | Protein Coding | 38 | GC03P038265 | 2.169709 | <a href="https://www.genecards.org/cgi-bin/carddisp.pl?gene=SLC22A13">https://www.genecards.org/cgi-bin/carddisp.pl?gene=SLC22A13</a>               |
| PRMT3           | Arginine Methyltransferase 3                          | Protein Coding | 43 | GC11P020409 | 2.169315 | <a href="https://www.genecards.org/cgi-bin/carddisp.pl?gene=PRMT3">https://www.genecards.org/cgi-bin/carddisp.pl?gene=PRMT3</a>                     |
| ENSG00000287292 |                                                       | RNA Gene       | 6  | GC04P148445 | 2.167833 | <a href="https://www.genecards.org/cgi-bin/carddisp.pl?gene=ENSG00000287292">https://www.genecards.org/cgi-bin/carddisp.pl?gene=ENSG00000287292</a> |
| ENSG00000254599 |                                                       | RNA Gene       | 5  | GC11P098676 | 2.167833 | <a href="https://www.genecards.org/cgi-bin/carddisp.pl?gene=ENSG00000254599">https://www.genecards.org/cgi-bin/carddisp.pl?gene=ENSG00000254599</a> |
| HSALNG0133406   |                                                       | RNA Gene       | 3  | GC21P043345 | 2.167833 | <a href="https://www.genecards.org/cgi-bin/carddisp.pl?gene=HSALNG0133406">https://www.genecards.org/cgi-bin/carddisp.pl?gene=HSALNG0133406</a>     |
| MIR383          | MicroRNA 383                                          | RNA Gene       | 15 | GC08M014853 | 2.166983 | <a href="https://www.genecards.org/cgi-bin/carddisp.pl?gene=MIR383">https://www.genecards.org/cgi-bin/carddisp.pl?gene=MIR383</a>                   |
| HNRNPH3         | Heterogeneous Nuclear Ribonucleoprotein H3            | Protein Coding | 39 | GC10P068331 | 2.154793 | <a href="https://www.genecards.org/cgi-bin/carddisp.pl?gene=HNRNPH3">https://www.genecards.org/cgi-bin/carddisp.pl?gene=HNRNPH3</a>                 |
| ZNF703          | Zinc Finger Protein 703                               | Protein Coding | 36 | GC08P037695 | 2.153392 | <a href="https://www.genecards.org/cgi-bin/carddisp.pl?gene=ZNF703">https://www.genecards.org/cgi-bin/carddisp.pl?gene=ZNF703</a>                   |

|                 |                                                    |                |    |             |          |                                                                                                                                                     |
|-----------------|----------------------------------------------------|----------------|----|-------------|----------|-----------------------------------------------------------------------------------------------------------------------------------------------------|
| MNX1-AS1        | MNX1<br>Antisense RNA 1 (Head To Head)             | RNA Gene       | 16 | GC07P157010 | 2.150087 | <a href="https://www.genecards.org/cgi-bin/carddisp.pl?gene=MNX1-AS1">https://www.genecards.org/cgi-bin/carddisp.pl?gene=MNX1-AS1</a>               |
| GINS3           | GINS Complex Subunit 3                             | Protein Coding | 34 | GC16P058328 | 2.148112 | <a href="https://www.genecards.org/cgi-bin/carddisp.pl?gene=GINS3">https://www.genecards.org/cgi-bin/carddisp.pl?gene=GINS3</a>                     |
| ANKHD1          | Ankyrin Repeat And KH Domain Containing 1          | Protein Coding | 35 | GC05P143777 | 2.144107 | <a href="https://www.genecards.org/cgi-bin/carddisp.pl?gene=ANKHD1">https://www.genecards.org/cgi-bin/carddisp.pl?gene=ANKHD1</a>                   |
| H2AC7           | H2A Clustered Histone 7                            | Protein Coding | 29 | GC06M047210 | 2.141566 | <a href="https://www.genecards.org/cgi-bin/carddisp.pl?gene=H2AC7">https://www.genecards.org/cgi-bin/carddisp.pl?gene=H2AC7</a>                     |
| H2AC16          | H2A Clustered Histone 16                           | Protein Coding | 29 | GC06P055054 | 2.140799 | <a href="https://www.genecards.org/cgi-bin/carddisp.pl?gene=H2AC16">https://www.genecards.org/cgi-bin/carddisp.pl?gene=H2AC16</a>                   |
| NOA1            | Nitric Oxide Associated 1                          | Protein Coding | 34 | GC04M056963 | 2.140753 | <a href="https://www.genecards.org/cgi-bin/carddisp.pl?gene=NOA1">https://www.genecards.org/cgi-bin/carddisp.pl?gene=NOA1</a>                       |
| CORO2B          | Coronin 2B                                         | Protein Coding | 38 | GC15P077105 | 2.134557 | <a href="https://www.genecards.org/cgi-bin/carddisp.pl?gene=CORO2B">https://www.genecards.org/cgi-bin/carddisp.pl?gene=CORO2B</a>                   |
| ENSG00000272823 |                                                    | RNA Gene       | 5  | GC01M220828 | 2.13395  | <a href="https://www.genecards.org/cgi-bin/carddisp.pl?gene=ENSG00000272823">https://www.genecards.org/cgi-bin/carddisp.pl?gene=ENSG00000272823</a> |
| HSALNG0010758   |                                                    | RNA Gene       | 2  | GC01P220796 | 2.13395  | <a href="https://www.genecards.org/cgi-bin/carddisp.pl?gene=HSALNG0010758">https://www.genecards.org/cgi-bin/carddisp.pl?gene=HSALNG0010758</a>     |
| Inc-MARC2-2     |                                                    | RNA Gene       | 2  | GC01P220804 | 2.13395  | <a href="https://www.genecards.org/cgi-bin/carddisp.pl?gene=Inc-MARC2-2">https://www.genecards.org/cgi-bin/carddisp.pl?gene=Inc-MARC2-2</a>         |
| PCOLCE          | Procollagen C-Endopeptidase Enhancer               | Protein Coding | 40 | GC07P100602 | 2.132756 | <a href="https://www.genecards.org/cgi-bin/carddisp.pl?gene=PCOLCE">https://www.genecards.org/cgi-bin/carddisp.pl?gene=PCOLCE</a>                   |
| CASP8AP2        | Caspase 8 Associated Protein 2                     | Protein Coding | 34 | GC06P089829 | 2.128404 | <a href="https://www.genecards.org/cgi-bin/carddisp.pl?gene=CASP8AP2">https://www.genecards.org/cgi-bin/carddisp.pl?gene=CASP8AP2</a>               |
| ZC3H12A         | Zinc Finger CCCH-Type Containing 12A               | Protein Coding | 37 | GC01P037474 | 2.124047 | <a href="https://www.genecards.org/cgi-bin/carddisp.pl?gene=ZC3H12A">https://www.genecards.org/cgi-bin/carddisp.pl?gene=ZC3H12A</a>                 |
| C16orf72        | Chromosome 16 Open Reading Frame 72                | Protein Coding | 32 | GC16P009103 | 2.117929 | <a href="https://www.genecards.org/cgi-bin/carddisp.pl?gene=C16orf72">https://www.genecards.org/cgi-bin/carddisp.pl?gene=C16orf72</a>               |
| ATP6AP1L        | ATPase H+ Transporting Accessory Protein 1 Like    | Protein Coding | 26 | GC05P082279 | 2.116091 | <a href="https://www.genecards.org/cgi-bin/carddisp.pl?gene=ATP6AP1L">https://www.genecards.org/cgi-bin/carddisp.pl?gene=ATP6AP1L</a>               |
| H2BC5           | H2B Clustered Histone 5                            | Protein Coding | 29 | GC06P055583 | 2.114598 | <a href="https://www.genecards.org/cgi-bin/carddisp.pl?gene=H2BC5">https://www.genecards.org/cgi-bin/carddisp.pl?gene=H2BC5</a>                     |
| PGLS            | 6-Phosphogluconolactonase                          | Protein Coding | 39 | GC19P026640 | 2.113848 | <a href="https://www.genecards.org/cgi-bin/carddisp.pl?gene=PGLS">https://www.genecards.org/cgi-bin/carddisp.pl?gene=PGLS</a>                       |
| HMCEs           | 5-Hydroxymethyl cytosine Binding, ES Cell Specific | Protein Coding | 31 | GC03P129278 | 2.112906 | <a href="https://www.genecards.org/cgi-bin/carddisp.pl?gene=HMCEs">https://www.genecards.org/cgi-bin/carddisp.pl?gene=HMCEs</a>                     |

|                 |                                                          |                |    |             |          |                                                                                                                                                     |
|-----------------|----------------------------------------------------------|----------------|----|-------------|----------|-----------------------------------------------------------------------------------------------------------------------------------------------------|
| RAPGEF6         | Rap Guanine Nucleotide Exchange Factor 6                 | Protein Coding | 39 | GC05M131423 | 2.111747 | <a href="https://www.genecards.org/cgi-bin/carddisp.pl?gene=RAPGEF6">https://www.genecards.org/cgi-bin/carddisp.pl?gene=RAPGEF6</a>                 |
| H3C7            | H3 Clustered Histone 7                                   | Protein Coding | 28 | GC06M047217 | 2.107437 | <a href="https://www.genecards.org/cgi-bin/carddisp.pl?gene=H3C7">https://www.genecards.org/cgi-bin/carddisp.pl?gene=H3C7</a>                       |
| GAPDHS          | Glyceraldehyde -3-Phosphate Dehydrogenase, Spermatogenic | Protein Coding | 43 | GC19P040351 | 2.107219 | <a href="https://www.genecards.org/cgi-bin/carddisp.pl?gene=GAPDHS">https://www.genecards.org/cgi-bin/carddisp.pl?gene=GAPDHS</a>                   |
| H3C12           | H3 Clustered Histone 12                                  | Protein Coding | 29 | GC06M047215 | 2.10359  | <a href="https://www.genecards.org/cgi-bin/carddisp.pl?gene=H3C12">https://www.genecards.org/cgi-bin/carddisp.pl?gene=H3C12</a>                     |
| KLK14           | Kallikrein Related Peptidase 14                          | Protein Coding | 38 | GC19M051077 | 2.096282 | <a href="https://www.genecards.org/cgi-bin/carddisp.pl?gene=KLK14">https://www.genecards.org/cgi-bin/carddisp.pl?gene=KLK14</a>                     |
| TPI1P1          | Triosephosphate Isomerase 1 Pseudogene 1                 | Pseudogene     | 7  | GC01P076699 | 2.095212 | <a href="https://www.genecards.org/cgi-bin/carddisp.pl?gene=TPI1P1">https://www.genecards.org/cgi-bin/carddisp.pl?gene=TPI1P1</a>                   |
| RAB24           | RAB24, Member RAS Oncogene Family                        | Protein Coding | 37 | GC05M177301 | 2.089585 | <a href="https://www.genecards.org/cgi-bin/carddisp.pl?gene=RAB24">https://www.genecards.org/cgi-bin/carddisp.pl?gene=RAB24</a>                     |
| ELP6            | Elongator Acetyltransferase Complex Subunit 6            | Protein Coding | 33 | GC03M047495 | 2.086529 | <a href="https://www.genecards.org/cgi-bin/carddisp.pl?gene=ELP6">https://www.genecards.org/cgi-bin/carddisp.pl?gene=ELP6</a>                       |
| SLFN11          | Schlafen Family Member 11                                | Protein Coding | 34 | GC17M035350 | 2.084761 | <a href="https://www.genecards.org/cgi-bin/carddisp.pl?gene=SLFN11">https://www.genecards.org/cgi-bin/carddisp.pl?gene=SLFN11</a>                   |
| OLFM1           | Olfactomedin 1                                           | Protein Coding | 40 | GC09P135075 | 2.082146 | <a href="https://www.genecards.org/cgi-bin/carddisp.pl?gene=OLFM1">https://www.genecards.org/cgi-bin/carddisp.pl?gene=OLFM1</a>                     |
| ENSG00000255046 |                                                          | RNA Gene       | 8  | GC08M011991 | 2.080244 | <a href="https://www.genecards.org/cgi-bin/carddisp.pl?gene=ENSG00000255046">https://www.genecards.org/cgi-bin/carddisp.pl?gene=ENSG00000255046</a> |
| ENSG00000222042 |                                                          | RNA Gene       | 6  | GC21M025169 | 2.080244 | <a href="https://www.genecards.org/cgi-bin/carddisp.pl?gene=ENSG00000222042">https://www.genecards.org/cgi-bin/carddisp.pl?gene=ENSG00000222042</a> |
| OTX2P1          | OTX2 Pseudogene 1                                        | Pseudogene     | 5  | GC09M075724 | 2.080244 | <a href="https://www.genecards.org/cgi-bin/carddisp.pl?gene=OTX2P1">https://www.genecards.org/cgi-bin/carddisp.pl?gene=OTX2P1</a>                   |
| Inc-JCAD-2      |                                                          | RNA Gene       | 5  | GC10M031184 | 2.080244 | <a href="https://www.genecards.org/cgi-bin/carddisp.pl?gene=Inc-JCAD-2">https://www.genecards.org/cgi-bin/carddisp.pl?gene=Inc-JCAD-2</a>           |
| ENSG00000237936 |                                                          | Pseudogene     | 4  | GC10M029891 | 2.080244 | <a href="https://www.genecards.org/cgi-bin/carddisp.pl?gene=ENSG00000237936">https://www.genecards.org/cgi-bin/carddisp.pl?gene=ENSG00000237936</a> |
| SLC25A48        | Solute Carrier Family 25 Member 48                       | Protein Coding | 32 | GC05P135579 | 2.077582 | <a href="https://www.genecards.org/cgi-bin/carddisp.pl?gene=SLC25A48">https://www.genecards.org/cgi-bin/carddisp.pl?gene=SLC25A48</a>               |
| DAP             | Death Associated Protein                                 | Protein Coding | 40 | GC05M010679 | 2.076235 | <a href="https://www.genecards.org/cgi-bin/carddisp.pl?gene=DAP">https://www.genecards.org/cgi-bin/carddisp.pl?gene=DAP</a>                         |
| RPS27P18        | Ribosomal Protein S27 Pseudogene 18                      | Pseudogene     | 6  | GC10M125473 | 2.073174 | <a href="https://www.genecards.org/cgi-bin/carddisp.pl?gene=RPS27P18">https://www.genecards.org/cgi-bin/carddisp.pl?gene=RPS27P18</a>               |

|           |                                                             |                |    |             |          |                                                                                                                                         |
|-----------|-------------------------------------------------------------|----------------|----|-------------|----------|-----------------------------------------------------------------------------------------------------------------------------------------|
| THNSL2    | Threonine Synthase Like 2                                   | Protein Coding | 33 | GC02P088170 | 2.072518 | <a href="https://www.genecards.org/cgi-bin/carddisp.pl?gene=THNSL2">https://www.genecards.org/cgi-bin/carddisp.pl?gene=THNSL2</a>       |
| EXOC7     | Exocyst Complex Component 7                                 | Protein Coding | 42 | GC17M076080 | 2.06974  | <a href="https://www.genecards.org/cgi-bin/carddisp.pl?gene=EXOC7">https://www.genecards.org/cgi-bin/carddisp.pl?gene=EXOC7</a>         |
| DUSP14    | Dual Specificity Phosphatase 14                             | Protein Coding | 38 | GC17P037489 | 2.069582 | <a href="https://www.genecards.org/cgi-bin/carddisp.pl?gene=DUSP14">https://www.genecards.org/cgi-bin/carddisp.pl?gene=DUSP14</a>       |
| IPO8      | Importin 8                                                  | Protein Coding | 36 | GC12M030628 | 2.067233 | <a href="https://www.genecards.org/cgi-bin/carddisp.pl?gene=IPO8">https://www.genecards.org/cgi-bin/carddisp.pl?gene=IPO8</a>           |
| ARPC1A    | Actin Related Protein 2/3 Complex Subunit 1A                | Protein Coding | 41 | GC07P099325 | 2.066761 | <a href="https://www.genecards.org/cgi-bin/carddisp.pl?gene=ARPC1A">https://www.genecards.org/cgi-bin/carddisp.pl?gene=ARPC1A</a>       |
| LAMTOR1   | Late Endosomal/Lysosomal Adaptor, MAPK And MTOR Activator 1 | Protein Coding | 36 | GC11M072085 | 2.063451 | <a href="https://www.genecards.org/cgi-bin/carddisp.pl?gene=LAMTOR1">https://www.genecards.org/cgi-bin/carddisp.pl?gene=LAMTOR1</a>     |
| RADX      | RPA1 Related Single Stranded DNA Binding Protein, X-Linked  | Protein Coding | 26 | GC0XP106612 | 2.057263 | <a href="https://www.genecards.org/cgi-bin/carddisp.pl?gene=RADX">https://www.genecards.org/cgi-bin/carddisp.pl?gene=RADX</a>           |
| DGAT2L7P  | Diacylglycerol O-Acyltransferase 2 Like 7, Pseudogene       | Pseudogene     | 12 | GC07M101201 | 2.055746 | <a href="https://www.genecards.org/cgi-bin/carddisp.pl?gene=DGAT2L7P">https://www.genecards.org/cgi-bin/carddisp.pl?gene=DGAT2L7P</a>   |
| ARFGEF3   | ARFGEF Family Member 3                                      | Protein Coding | 30 | GC06P138161 | 2.054548 | <a href="https://www.genecards.org/cgi-bin/carddisp.pl?gene=ARFGEF3">https://www.genecards.org/cgi-bin/carddisp.pl?gene=ARFGEF3</a>     |
| CEP85     | Centrosomal Protein 85                                      | Protein Coding | 35 | GC01P026234 | 2.050153 | <a href="https://www.genecards.org/cgi-bin/carddisp.pl?gene=CEP85">https://www.genecards.org/cgi-bin/carddisp.pl?gene=CEP85</a>         |
| LINC00598 | Long Intergenic Non-Protein Coding RNA 598                  | RNA Gene       | 16 | GC13M040088 | 2.047847 | <a href="https://www.genecards.org/cgi-bin/carddisp.pl?gene=LINC00598">https://www.genecards.org/cgi-bin/carddisp.pl?gene=LINC00598</a> |
| MIR190B   | MicroRNA 190b                                               | RNA Gene       | 15 | GC01M154193 | 2.042446 | <a href="https://www.genecards.org/cgi-bin/carddisp.pl?gene=MIR190B">https://www.genecards.org/cgi-bin/carddisp.pl?gene=MIR190B</a>     |
| TRAPPC13  | Trafficking Protein Particle Complex Subunit 13             | Protein Coding | 31 | GC05P065625 | 2.04026  | <a href="https://www.genecards.org/cgi-bin/carddisp.pl?gene=TRAPPC13">https://www.genecards.org/cgi-bin/carddisp.pl?gene=TRAPPC13</a>   |
| TSKU      | Tsukushi, Small Leucine Rich Proteoglycan                   | Protein Coding | 34 | GC11P076782 | 2.038889 | <a href="https://www.genecards.org/cgi-bin/carddisp.pl?gene=TSKU">https://www.genecards.org/cgi-bin/carddisp.pl?gene=TSKU</a>           |
| SGPP1     | Sphingosine-1-Phosphate Phosphatase 1                       | Protein Coding | 40 | GC14M063684 | 2.038044 | <a href="https://www.genecards.org/cgi-bin/carddisp.pl?gene=SGPP1">https://www.genecards.org/cgi-bin/carddisp.pl?gene=SGPP1</a>         |
| PLD4      | Phospholipase D Family Member 4                             | Protein Coding | 40 | GC14P104924 | 2.034567 | <a href="https://www.genecards.org/cgi-bin/carddisp.pl?gene=PLD4">https://www.genecards.org/cgi-bin/carddisp.pl?gene=PLD4</a>           |

|                 |                                                                 |                   |    |             |          |                                                                                                                                                     |
|-----------------|-----------------------------------------------------------------|-------------------|----|-------------|----------|-----------------------------------------------------------------------------------------------------------------------------------------------------|
| STARP1          | Steroidogenic<br>Acute<br>Regulatory<br>Protein<br>Pseudogene 1 | Pseudogene        | 7  | GC13M065280 | 2.028617 | <a href="https://www.genecards.org/cgi-bin/carddisp.pl?gene=STARP1">https://www.genecards.org/cgi-bin/carddisp.pl?gene=STARP1</a>                   |
| RAB9A           | RAB9A,<br>Member RAS<br>Oncogene<br>Family                      | Protein<br>Coding | 40 | GC0XP013707 | 2.026031 | <a href="https://www.genecards.org/cgi-bin/carddisp.pl?gene=RAB9A">https://www.genecards.org/cgi-bin/carddisp.pl?gene=RAB9A</a>                     |
| GUCA2B          | Guanylate<br>Cyclase<br>Activator 2B                            | Protein<br>Coding | 40 | GC01P042153 | 2.025527 | <a href="https://www.genecards.org/cgi-bin/carddisp.pl?gene=GUCA2B">https://www.genecards.org/cgi-bin/carddisp.pl?gene=GUCA2B</a>                   |
| ASTN1           | Astrotactin 1                                                   | Protein<br>Coding | 34 | GC01M176857 | 2.018537 | <a href="https://www.genecards.org/cgi-bin/carddisp.pl?gene=ASTN1">https://www.genecards.org/cgi-bin/carddisp.pl?gene=ASTN1</a>                     |
| PDIA2           | Protein<br>Disulfide<br>Isomerase<br>Family A<br>Member 2       | Protein<br>Coding | 39 | GC16P005498 | 2.018224 | <a href="https://www.genecards.org/cgi-bin/carddisp.pl?gene=PDIA2">https://www.genecards.org/cgi-bin/carddisp.pl?gene=PDIA2</a>                     |
| PSAPL1          | Prosaposin Like<br>1                                            | Protein<br>Coding | 33 | GC04M007434 | 2.018184 | <a href="https://www.genecards.org/cgi-bin/carddisp.pl?gene=PSAPL1">https://www.genecards.org/cgi-bin/carddisp.pl?gene=PSAPL1</a>                   |
| ENSG00000234389 |                                                                 | RNA<br>Gene       | 8  | GC02P102438 | 2.017039 | <a href="https://www.genecards.org/cgi-bin/carddisp.pl?gene=ENSG00000234389">https://www.genecards.org/cgi-bin/carddisp.pl?gene=ENSG00000234389</a> |
| ENSG00000249631 |                                                                 | RNA<br>Gene       | 7  | GC04P014604 | 2.017039 | <a href="https://www.genecards.org/cgi-bin/carddisp.pl?gene=ENSG00000249631">https://www.genecards.org/cgi-bin/carddisp.pl?gene=ENSG00000249631</a> |
| HSALNG0088100   |                                                                 | RNA<br>Gene       | 4  | GC11M128462 | 2.017039 | <a href="https://www.genecards.org/cgi-bin/carddisp.pl?gene=HSALNG0088100">https://www.genecards.org/cgi-bin/carddisp.pl?gene=HSALNG0088100</a>     |
| HSALNG0088101   |                                                                 | RNA<br>Gene       | 4  | GC11P128480 | 2.017039 | <a href="https://www.genecards.org/cgi-bin/carddisp.pl?gene=HSALNG0088101">https://www.genecards.org/cgi-bin/carddisp.pl?gene=HSALNG0088101</a>     |
| HSALNG0088102   |                                                                 | RNA<br>Gene       | 4  | GC11M128489 | 2.017039 | <a href="https://www.genecards.org/cgi-bin/carddisp.pl?gene=HSALNG0088102">https://www.genecards.org/cgi-bin/carddisp.pl?gene=HSALNG0088102</a>     |
| C15orf48        | Chromosome<br>15 Open<br>Reading Frame<br>48                    | Protein<br>Coding | 34 | GC15P045430 | 2.01301  | <a href="https://www.genecards.org/cgi-bin/carddisp.pl?gene=C15orf48">https://www.genecards.org/cgi-bin/carddisp.pl?gene=C15orf48</a>               |
| HSH2D           | Hematopoietic<br>SH2 Domain<br>Containing<br>Brain Enriched     | Protein<br>Coding | 35 | GC19P026611 | 2.007876 | <a href="https://www.genecards.org/cgi-bin/carddisp.pl?gene=HSH2D">https://www.genecards.org/cgi-bin/carddisp.pl?gene=HSH2D</a>                     |
| BCAS1           | Myelin<br>Associated<br>Protein 1                               | Protein<br>Coding | 38 | GC20M053936 | 2.00727  | <a href="https://www.genecards.org/cgi-bin/carddisp.pl?gene=BCAS1">https://www.genecards.org/cgi-bin/carddisp.pl?gene=BCAS1</a>                     |
| TXNDC5          | Thioredoxin<br>Domain<br>Containing 5                           | Protein<br>Coding | 39 | GC06M007893 | 2.003392 | <a href="https://www.genecards.org/cgi-bin/carddisp.pl?gene=TXNDC5">https://www.genecards.org/cgi-bin/carddisp.pl?gene=TXNDC5</a>                   |
| LINC00355       | Long Intergenic<br>Non-Protein<br>Coding RNA<br>355             | RNA<br>Gene       | 15 | GC13M063838 | 2.003167 | <a href="https://www.genecards.org/cgi-bin/carddisp.pl?gene=LINC00355">https://www.genecards.org/cgi-bin/carddisp.pl?gene=LINC00355</a>             |
| LOC105373170    | Uncharacterized<br>LOC105373170                                 | RNA<br>Gene       | 6  | GC01M231768 | 2.003167 | <a href="https://www.genecards.org/cgi-bin/carddisp.pl?gene=LOC105373170">https://www.genecards.org/cgi-bin/carddisp.pl?gene=LOC105373170</a>       |



|                 |                                                              |                |    |             |          |                                                                                                                                                     |
|-----------------|--------------------------------------------------------------|----------------|----|-------------|----------|-----------------------------------------------------------------------------------------------------------------------------------------------------|
| PLK3            | Polo Like Kinase 3                                           | Protein Coding | 44 | GC01P044799 | 2.002878 | <a href="https://www.genecards.org/cgi-bin/carddisp.pl?gene=PLK3">https://www.genecards.org/cgi-bin/carddisp.pl?gene=PLK3</a>                       |
| HIF1A-AS2       | HIF1A Antisense RNA 2                                        | RNA Gene       | 16 | GC14M061747 | 2.002368 | <a href="https://www.genecards.org/cgi-bin/carddisp.pl?gene=HIF1A-AS2">https://www.genecards.org/cgi-bin/carddisp.pl?gene=HIF1A-AS2</a>             |
| PRAM1           | PML-RARA Regulated Adaptor Molecule 1                        | Protein Coding | 34 | GC19M008490 | 2.001507 | <a href="https://www.genecards.org/cgi-bin/carddisp.pl?gene=PRAM1">https://www.genecards.org/cgi-bin/carddisp.pl?gene=PRAM1</a>                     |
| PLPP1           | Phospholipid Phosphatase 1                                   | Protein Coding | 34 | GC05M055425 | 1.994192 | <a href="https://www.genecards.org/cgi-bin/carddisp.pl?gene=PLPP1">https://www.genecards.org/cgi-bin/carddisp.pl?gene=PLPP1</a>                     |
| PYHIN1          | Pyrin And HIN Domain Family Member 1                         | Protein Coding | 36 | GC01P158900 | 1.993069 | <a href="https://www.genecards.org/cgi-bin/carddisp.pl?gene=PYHIN1">https://www.genecards.org/cgi-bin/carddisp.pl?gene=PYHIN1</a>                   |
| DNAJC11         | DnaJ Heat Shock Protein Family (Hsp40) Member C11            | Protein Coding | 35 | GC01M006634 | 1.990315 | <a href="https://www.genecards.org/cgi-bin/carddisp.pl?gene=DNAJC11">https://www.genecards.org/cgi-bin/carddisp.pl?gene=DNAJC11</a>                 |
| UGT2A1          | UDP Glucuronosyltransferase Family 2 Member A1 Complex Locus | Protein Coding | 34 | GC04M069588 | 1.983822 | <a href="https://www.genecards.org/cgi-bin/carddisp.pl?gene=UGT2A1">https://www.genecards.org/cgi-bin/carddisp.pl?gene=UGT2A1</a>                   |
| CENPW           | Centromere Protein W                                         | Protein Coding | 34 | GC06P126339 | 1.983765 | <a href="https://www.genecards.org/cgi-bin/carddisp.pl?gene=CENPW">https://www.genecards.org/cgi-bin/carddisp.pl?gene=CENPW</a>                     |
| KRT8P18         | Keratin 8 Pseudogene 18                                      | Pseudogene     | 5  | GC03M035233 | 1.978504 | <a href="https://www.genecards.org/cgi-bin/carddisp.pl?gene=KRT8P18">https://www.genecards.org/cgi-bin/carddisp.pl?gene=KRT8P18</a>                 |
| BEX2            | Brain Expressed X-Linked 2                                   | Protein Coding | 31 | GC0XM103309 | 1.976324 | <a href="https://www.genecards.org/cgi-bin/carddisp.pl?gene=BEX2">https://www.genecards.org/cgi-bin/carddisp.pl?gene=BEX2</a>                       |
| DHRS4L2         | Dehydrogenase /Reductase 4 Like 2                            | Protein Coding | 34 | GC14P026318 | 1.976133 | <a href="https://www.genecards.org/cgi-bin/carddisp.pl?gene=DHRS4L2">https://www.genecards.org/cgi-bin/carddisp.pl?gene=DHRS4L2</a>                 |
| MLF2            | Myeloid Leukemia Factor 2                                    | Protein Coding | 36 | GC12M006750 | 1.974125 | <a href="https://www.genecards.org/cgi-bin/carddisp.pl?gene=MLF2">https://www.genecards.org/cgi-bin/carddisp.pl?gene=MLF2</a>                       |
| FAM172A         | Family With Sequence Similarity 172 Member A                 | Protein Coding | 37 | GC05M093617 | 1.972884 | <a href="https://www.genecards.org/cgi-bin/carddisp.pl?gene=FAM172A">https://www.genecards.org/cgi-bin/carddisp.pl?gene=FAM172A</a>                 |
| YIPF6           | Yip1 Domain Family Member 6                                  | Protein Coding | 34 | GC0XP068498 | 1.97256  | <a href="https://www.genecards.org/cgi-bin/carddisp.pl?gene=YIPF6">https://www.genecards.org/cgi-bin/carddisp.pl?gene=YIPF6</a>                     |
| TRIM47          | Tripartite Motif Containing 47                               | Protein Coding | 34 | GC17M075874 | 1.969799 | <a href="https://www.genecards.org/cgi-bin/carddisp.pl?gene=TRIM47">https://www.genecards.org/cgi-bin/carddisp.pl?gene=TRIM47</a>                   |
| SLC9A9-AS1      | SLC9A9 Antisense RNA 1                                       | RNA Gene       | 13 | GC03P143342 | 1.966096 | <a href="https://www.genecards.org/cgi-bin/carddisp.pl?gene=SLC9A9-AS1">https://www.genecards.org/cgi-bin/carddisp.pl?gene=SLC9A9-AS1</a>           |
| LOC100130331    | POTE Ankyrin Domain Family, Member F Pseudogene              | Pseudogene     | 10 | GC01P237862 | 1.966096 | <a href="https://www.genecards.org/cgi-bin/carddisp.pl?gene=LOC100130331">https://www.genecards.org/cgi-bin/carddisp.pl?gene=LOC100130331</a>       |
| ENSG00000257322 |                                                              | RNA Gene       | 8  | GC12M093003 | 1.966096 | <a href="https://www.genecards.org/cgi-bin/carddisp.pl?gene=ENSG00000257322">https://www.genecards.org/cgi-bin/carddisp.pl?gene=ENSG00000257322</a> |

|                 |                                                                  |            |   |             |          |                                                                                                                                                     |
|-----------------|------------------------------------------------------------------|------------|---|-------------|----------|-----------------------------------------------------------------------------------------------------------------------------------------------------|
| ENSG00000236501 |                                                                  | RNA Gene   | 8 | GC02M176959 | 1.966096 | <a href="https://www.genecards.org/cgi-bin/carddisp.pl?gene=ENSG00000236501">https://www.genecards.org/cgi-bin/carddisp.pl?gene=ENSG00000236501</a> |
| RNU6-908P       | RNA, U6 Small Nuclear 908, Pseudogene                            | Pseudogene | 7 | GC10P029711 | 1.966096 | <a href="https://www.genecards.org/cgi-bin/carddisp.pl?gene=RNU6-908P">https://www.genecards.org/cgi-bin/carddisp.pl?gene=RNU6-908P</a>             |
| ENSG00000250541 |                                                                  | RNA Gene   | 6 | GC04P025771 | 1.966096 | <a href="https://www.genecards.org/cgi-bin/carddisp.pl?gene=ENSG00000250541">https://www.genecards.org/cgi-bin/carddisp.pl?gene=ENSG00000250541</a> |
| ENSG00000265994 |                                                                  | RNA Gene   | 6 | GC18P028638 | 1.966096 | <a href="https://www.genecards.org/cgi-bin/carddisp.pl?gene=ENSG00000265994">https://www.genecards.org/cgi-bin/carddisp.pl?gene=ENSG00000265994</a> |
| ENSG00000207171 |                                                                  | RNA Gene   | 6 | GC04P168471 | 1.966096 | <a href="https://www.genecards.org/cgi-bin/carddisp.pl?gene=ENSG00000207171">https://www.genecards.org/cgi-bin/carddisp.pl?gene=ENSG00000207171</a> |
| EEF1A1P20       | Eukaryotic Translation Elongation Factor 1 Alpha 1 Pseudogene 20 | Pseudogene | 5 | GC05P099996 | 1.966096 | <a href="https://www.genecards.org/cgi-bin/carddisp.pl?gene=EEF1A1P20">https://www.genecards.org/cgi-bin/carddisp.pl?gene=EEF1A1P20</a>             |
| RNU1-35P        | RNA, U1 Small Nuclear 35, Pseudogene                             | Pseudogene | 5 | GC08M135742 | 1.966096 | <a href="https://www.genecards.org/cgi-bin/carddisp.pl?gene=RNU1-35P">https://www.genecards.org/cgi-bin/carddisp.pl?gene=RNU1-35P</a>               |
| ENSG00000235464 |                                                                  | RNA Gene   | 5 | GC07M035496 | 1.966096 | <a href="https://www.genecards.org/cgi-bin/carddisp.pl?gene=ENSG00000235464">https://www.genecards.org/cgi-bin/carddisp.pl?gene=ENSG00000235464</a> |
| ENSG00000236389 |                                                                  | RNA Gene   | 5 | GC06M134706 | 1.966096 | <a href="https://www.genecards.org/cgi-bin/carddisp.pl?gene=ENSG00000236389">https://www.genecards.org/cgi-bin/carddisp.pl?gene=ENSG00000236389</a> |
| RNU6-161P       | RNA, U6 Small Nuclear 161, Pseudogene                            | Pseudogene | 5 | GC01P076753 | 1.966096 | <a href="https://www.genecards.org/cgi-bin/carddisp.pl?gene=RNU6-161P">https://www.genecards.org/cgi-bin/carddisp.pl?gene=RNU6-161P</a>             |
| MTND1P25        | MT-ND1 Pseudogene 25                                             | Pseudogene | 4 | GC01M237942 | 1.966096 | <a href="https://www.genecards.org/cgi-bin/carddisp.pl?gene=MTND1P25">https://www.genecards.org/cgi-bin/carddisp.pl?gene=MTND1P25</a>               |
| ENSG00000284676 |                                                                  | RNA Gene   | 4 | GC01P029755 | 1.966096 | <a href="https://www.genecards.org/cgi-bin/carddisp.pl?gene=ENSG00000284676">https://www.genecards.org/cgi-bin/carddisp.pl?gene=ENSG00000284676</a> |
| ENSG00000287032 |                                                                  | RNA Gene   | 4 | GC07M035614 | 1.966096 | <a href="https://www.genecards.org/cgi-bin/carddisp.pl?gene=ENSG00000287032">https://www.genecards.org/cgi-bin/carddisp.pl?gene=ENSG00000287032</a> |
| ENSG00000276627 |                                                                  | RNA Gene   | 4 | GC20P060716 | 1.966096 | <a href="https://www.genecards.org/cgi-bin/carddisp.pl?gene=ENSG00000276627">https://www.genecards.org/cgi-bin/carddisp.pl?gene=ENSG00000276627</a> |
| HSALNG0076986   |                                                                  | RNA Gene   | 4 | GC10M031161 | 1.966096 | <a href="https://www.genecards.org/cgi-bin/carddisp.pl?gene=HSALNG0076986">https://www.genecards.org/cgi-bin/carddisp.pl?gene=HSALNG0076986</a>     |
| Inc-CRYAA-1     |                                                                  | RNA Gene   | 4 | GC21P043350 | 1.966096 | <a href="https://www.genecards.org/cgi-bin/carddisp.pl?gene=Inc-CRYAA-1">https://www.genecards.org/cgi-bin/carddisp.pl?gene=Inc-CRYAA-1</a>         |
| piR-55809-001   |                                                                  | RNA Gene   | 4 | GC01M095168 | 1.966096 | <a href="https://www.genecards.org/cgi-bin/carddisp.pl?gene=piR-55809-001">https://www.genecards.org/cgi-bin/carddisp.pl?gene=piR-55809-001</a>     |
| Inc-DDX60L-3    |                                                                  | RNA Gene   | 4 | GC04M168468 | 1.966096 | <a href="https://www.genecards.org/cgi-bin/carddisp.pl?gene=Inc-DDX60L-3">https://www.genecards.org/cgi-bin/carddisp.pl?gene=Inc-DDX60L-3</a>       |

|                   |                                 |            |   |             |          |                                                                                                                                                         |
|-------------------|---------------------------------|------------|---|-------------|----------|---------------------------------------------------------------------------------------------------------------------------------------------------------|
| LOC102723733      | Uncharacterized<br>LOC102723733 | RNA Gene   | 3 | GC04P025862 | 1.966096 | <a href="https://www.genecards.org/cgi-bin/carddisp.pl?gene=LOC102723733">https://www.genecards.org/cgi-bin/carddisp.pl?gene=LOC102723733</a>           |
| ENSG00000270927   |                                 | Pseudogene | 3 | GC01M029904 | 1.966096 | <a href="https://www.genecards.org/cgi-bin/carddisp.pl?gene=ENSG00000270927">https://www.genecards.org/cgi-bin/carddisp.pl?gene=ENSG00000270927</a>     |
| ENSG00000226973   |                                 | Pseudogene | 3 | GC01P115471 | 1.966096 | <a href="https://www.genecards.org/cgi-bin/carddisp.pl?gene=ENSG00000226973">https://www.genecards.org/cgi-bin/carddisp.pl?gene=ENSG00000226973</a>     |
| LOC107986198      | Uncharacterized<br>LOC107986198 | RNA Gene   | 3 | GC04M168488 | 1.966096 | <a href="https://www.genecards.org/cgi-bin/carddisp.pl?gene=LOC107986198">https://www.genecards.org/cgi-bin/carddisp.pl?gene=LOC107986198</a>           |
| Inc-EDRF1-4       |                                 | RNA Gene   | 3 | GC10P125590 | 1.966096 | <a href="https://www.genecards.org/cgi-bin/carddisp.pl?gene=Inc-EDRF1-4">https://www.genecards.org/cgi-bin/carddisp.pl?gene=Inc-EDRF1-4</a>             |
| HSALNG0038430     |                                 | RNA Gene   | 3 | GC04P168487 | 1.966096 | <a href="https://www.genecards.org/cgi-bin/carddisp.pl?gene=HSALNG0038430">https://www.genecards.org/cgi-bin/carddisp.pl?gene=HSALNG0038430</a>         |
| HSALNG0029504     |                                 | RNA Gene   | 3 | GC03P143161 | 1.966096 | <a href="https://www.genecards.org/cgi-bin/carddisp.pl?gene=HSALNG0029504">https://www.genecards.org/cgi-bin/carddisp.pl?gene=HSALNG0029504</a>         |
| HSALNG0076987-001 |                                 | RNA Gene   | 3 | GC10P029811 | 1.966096 | <a href="https://www.genecards.org/cgi-bin/carddisp.pl?gene=HSALNG0076987-001">https://www.genecards.org/cgi-bin/carddisp.pl?gene=HSALNG0076987-001</a> |
| HSALNG0076987-002 |                                 | RNA Gene   | 3 | GC10P029812 | 1.966096 | <a href="https://www.genecards.org/cgi-bin/carddisp.pl?gene=HSALNG0076987-002">https://www.genecards.org/cgi-bin/carddisp.pl?gene=HSALNG0076987-002</a> |
| Inc-AIFM2-3       |                                 | RNA Gene   | 3 | GC10M069839 | 1.966096 | <a href="https://www.genecards.org/cgi-bin/carddisp.pl?gene=Inc-AIFM2-3">https://www.genecards.org/cgi-bin/carddisp.pl?gene=Inc-AIFM2-3</a>             |
| HSALNG0093093     |                                 | RNA Gene   | 3 | GC12M093112 | 1.966096 | <a href="https://www.genecards.org/cgi-bin/carddisp.pl?gene=HSALNG0093093">https://www.genecards.org/cgi-bin/carddisp.pl?gene=HSALNG0093093</a>         |
| piR-38051-198     |                                 | RNA Gene   | 3 | GC04M025877 | 1.966096 | <a href="https://www.genecards.org/cgi-bin/carddisp.pl?gene=piR-38051-198">https://www.genecards.org/cgi-bin/carddisp.pl?gene=piR-38051-198</a>         |
| piR-41195-080     |                                 | RNA Gene   | 3 | GC08M012002 | 1.966096 | <a href="https://www.genecards.org/cgi-bin/carddisp.pl?gene=piR-41195-080">https://www.genecards.org/cgi-bin/carddisp.pl?gene=piR-41195-080</a>         |
| piR-59297-626     |                                 | RNA Gene   | 3 | GC08P011819 | 1.966096 | <a href="https://www.genecards.org/cgi-bin/carddisp.pl?gene=piR-59297-626">https://www.genecards.org/cgi-bin/carddisp.pl?gene=piR-59297-626</a>         |
| AB372775          |                                 | RNA Gene   | 2 | GC10P069827 | 1.966096 | <a href="https://www.genecards.org/cgi-bin/carddisp.pl?gene=AB372775">https://www.genecards.org/cgi-bin/carddisp.pl?gene=AB372775</a>                   |
| HSALNG0029512     |                                 | RNA Gene   | 2 | GC03P143373 | 1.966096 | <a href="https://www.genecards.org/cgi-bin/carddisp.pl?gene=HSALNG0029512">https://www.genecards.org/cgi-bin/carddisp.pl?gene=HSALNG0029512</a>         |
| HSALNG0093097     |                                 | RNA Gene   | 2 | GC12M093154 | 1.966096 | <a href="https://www.genecards.org/cgi-bin/carddisp.pl?gene=HSALNG0093097">https://www.genecards.org/cgi-bin/carddisp.pl?gene=HSALNG0093097</a>         |
| piR-31109-001     |                                 | RNA Gene   | 2 | GC10P125633 | 1.966096 | <a href="https://www.genecards.org/cgi-bin/carddisp.pl?gene=piR-31109-001">https://www.genecards.org/cgi-bin/carddisp.pl?gene=piR-31109-001</a>         |
| piR-57133-376     |                                 | RNA Gene   | 2 | GC20P060683 | 1.966096 | <a href="https://www.genecards.org/cgi-bin/carddisp.pl?gene=piR-57133-376">https://www.genecards.org/cgi-bin/carddisp.pl?gene=piR-57133-376</a>         |

|                 |                                                                       |                |    |             |          |                                                                                                                                                     |
|-----------------|-----------------------------------------------------------------------|----------------|----|-------------|----------|-----------------------------------------------------------------------------------------------------------------------------------------------------|
| HSALNG0131408   |                                                                       | RNA Gene       | 2  | GC20M060680 | 1.966096 | <a href="https://www.genecards.org/cgi-bin/carddisp.pl?gene=HSALNG0131408">https://www.genecards.org/cgi-bin/carddisp.pl?gene=HSALNG0131408</a>     |
| ENSG00000254939 |                                                                       | Pseudogene     | 1  | GC11M098568 | 1.966096 | <a href="https://www.genecards.org/cgi-bin/carddisp.pl?gene=ENSG00000254939">https://www.genecards.org/cgi-bin/carddisp.pl?gene=ENSG00000254939</a> |
| HSALNG0068856   |                                                                       | RNA Gene       | 1  | GC08M135698 | 1.966096 | <a href="https://www.genecards.org/cgi-bin/carddisp.pl?gene=HSALNG0068856">https://www.genecards.org/cgi-bin/carddisp.pl?gene=HSALNG0068856</a>     |
| H2BC9           | H2B Clustered Histone 9 Nuclear Receptor Subfamily 6 Group A Member 1 | Protein Coding | 30 | GC06P055586 | 1.958859 | <a href="https://www.genecards.org/cgi-bin/carddisp.pl?gene=H2BC9">https://www.genecards.org/cgi-bin/carddisp.pl?gene=H2BC9</a>                     |
| NR6A1           |                                                                       | Protein Coding | 41 | GC09M124517 | 1.957877 | <a href="https://www.genecards.org/cgi-bin/carddisp.pl?gene=NR6A1">https://www.genecards.org/cgi-bin/carddisp.pl?gene=NR6A1</a>                     |
| POT1-AS1        | POT1 Antisense RNA 1                                                  | RNA Gene       | 15 | GC07P124929 | 1.951397 | <a href="https://www.genecards.org/cgi-bin/carddisp.pl?gene=POT1-AS1">https://www.genecards.org/cgi-bin/carddisp.pl?gene=POT1-AS1</a>               |
| MRPL40          | Mitochondrial Ribosomal Protein L40                                   | Protein Coding | 38 | GC22P020060 | 1.949222 | <a href="https://www.genecards.org/cgi-bin/carddisp.pl?gene=MRPL40">https://www.genecards.org/cgi-bin/carddisp.pl?gene=MRPL40</a>                   |
| PBX2P1          | PBX Homeobox 2 Pseudogene 1                                           | Pseudogene     | 11 | GC03P143176 | 1.94884  | <a href="https://www.genecards.org/cgi-bin/carddisp.pl?gene=PBX2P1">https://www.genecards.org/cgi-bin/carddisp.pl?gene=PBX2P1</a>                   |
| H2AC6           | H2A Clustered Histone 6 Family With Sequence Similarity 98 Member A   | Protein Coding | 27 | GC06P055579 | 1.948534 | <a href="https://www.genecards.org/cgi-bin/carddisp.pl?gene=H2AC6">https://www.genecards.org/cgi-bin/carddisp.pl?gene=H2AC6</a>                     |
| FAM98A          |                                                                       | Protein Coding | 31 | GC02M033583 | 1.944726 | <a href="https://www.genecards.org/cgi-bin/carddisp.pl?gene=FAM98A">https://www.genecards.org/cgi-bin/carddisp.pl?gene=FAM98A</a>                   |
| DPP10-AS1       | DPP10 Antisense RNA 1                                                 | RNA Gene       | 14 | GC02M115130 | 1.944704 | <a href="https://www.genecards.org/cgi-bin/carddisp.pl?gene=DPP10-AS1">https://www.genecards.org/cgi-bin/carddisp.pl?gene=DPP10-AS1</a>             |
| LINC02629       | Long Intergenic Non-Protein Coding RNA 2629                           | RNA Gene       | 6  | GC10P033910 | 1.943198 | <a href="https://www.genecards.org/cgi-bin/carddisp.pl?gene=LINC02629">https://www.genecards.org/cgi-bin/carddisp.pl?gene=LINC02629</a>             |
| RNU6-976P       | RNA, U6 Small Nuclear 976, Pseudogene                                 | Pseudogene     | 5  | GC14P084739 | 1.943198 | <a href="https://www.genecards.org/cgi-bin/carddisp.pl?gene=RNU6-976P">https://www.genecards.org/cgi-bin/carddisp.pl?gene=RNU6-976P</a>             |
| ENSG00000268473 |                                                                       | Pseudogene     | 2  | GC16M086434 | 1.943198 | <a href="https://www.genecards.org/cgi-bin/carddisp.pl?gene=ENSG00000268473">https://www.genecards.org/cgi-bin/carddisp.pl?gene=ENSG00000268473</a> |
| HSALNG0055801   |                                                                       | RNA Gene       | 2  | GC07P004174 | 1.943198 | <a href="https://www.genecards.org/cgi-bin/carddisp.pl?gene=HSALNG0055801">https://www.genecards.org/cgi-bin/carddisp.pl?gene=HSALNG0055801</a>     |
| LINC00520       | Long Intergenic Non-Protein Coding RNA 520                            | RNA Gene       | 17 | GC14M055781 | 1.941139 | <a href="https://www.genecards.org/cgi-bin/carddisp.pl?gene=LINC00520">https://www.genecards.org/cgi-bin/carddisp.pl?gene=LINC00520</a>             |
| EPB41L4A-DT     | EPB41L4A Divergent Transcript                                         | RNA Gene       | 15 | GC05P112421 | 1.937899 | <a href="https://www.genecards.org/cgi-bin/carddisp.pl?gene=EPB41L4A-DT">https://www.genecards.org/cgi-bin/carddisp.pl?gene=EPB41L4A-DT</a>         |

|                |                                                  |                   |    |             |          |                                                                                                                                                   |
|----------------|--------------------------------------------------|-------------------|----|-------------|----------|---------------------------------------------------------------------------------------------------------------------------------------------------|
| CALCOCO1       | Calcium Binding And Coiled-Coil Domain 1         | Protein Coding    | 37 | GC12M053709 | 1.934899 | <a href="https://www.genecards.org/cgi-bin/carddisp.pl?gene=CALCOCO1">https://www.genecards.org/cgi-bin/carddisp.pl?gene=CALCOCO1</a>             |
| DGKG           | Diacylglycerol Kinase Gamma                      | Protein Coding    | 44 | GC03M186105 | 1.934794 | <a href="https://www.genecards.org/cgi-bin/carddisp.pl?gene=DGKG">https://www.genecards.org/cgi-bin/carddisp.pl?gene=DGKG</a>                     |
| ST13P12        | ST13, Hsp70 Interacting Protein Pseudogene 12    | Pseudogene        | 6  | GC05P082968 | 1.933577 | <a href="https://www.genecards.org/cgi-bin/carddisp.pl?gene=ST13P12">https://www.genecards.org/cgi-bin/carddisp.pl?gene=ST13P12</a>               |
| H2AC1          | H2A Clustered Histone 1                          | Protein Coding    | 30 | GC06M025873 | 1.922436 | <a href="https://www.genecards.org/cgi-bin/carddisp.pl?gene=H2AC1">https://www.genecards.org/cgi-bin/carddisp.pl?gene=H2AC1</a>                   |
| MIR629         | MicroRNA 629                                     | RNA Gene          | 16 | GC15M070079 | 1.921234 | <a href="https://www.genecards.org/cgi-bin/carddisp.pl?gene=MIR629">https://www.genecards.org/cgi-bin/carddisp.pl?gene=MIR629</a>                 |
| IRAIN          | IGF1R Antisense Imprinted Non-Protein Coding RNA | RNA Gene          | 13 | GC15M098645 | 1.920473 | <a href="https://www.genecards.org/cgi-bin/carddisp.pl?gene=IRAIN">https://www.genecards.org/cgi-bin/carddisp.pl?gene=IRAIN</a>                   |
| RPL17-C18orf32 | RPL17-C18orf32 Readthrough                       | Protein Coding    | 21 | GC18M049481 | 1.91836  | <a href="https://www.genecards.org/cgi-bin/carddisp.pl?gene=RPL17-C18orf32">https://www.genecards.org/cgi-bin/carddisp.pl?gene=RPL17-C18orf32</a> |
| LINC00333      | Long Intergenic Non-Protein Coding RNA 333       | RNA Gene          | 13 | GC13P084140 | 1.910771 | <a href="https://www.genecards.org/cgi-bin/carddisp.pl?gene=LINC00333">https://www.genecards.org/cgi-bin/carddisp.pl?gene=LINC00333</a>           |
| NMBR           | Neuromedin B Receptor                            | Protein Coding    | 43 | GC06M142059 | 1.907632 | <a href="https://www.genecards.org/cgi-bin/carddisp.pl?gene=NMBR">https://www.genecards.org/cgi-bin/carddisp.pl?gene=NMBR</a>                     |
| LINC01818      | Long Intergenic Non-Protein Coding RNA 1818      | RNA Gene          | 8  | GC02P150170 | 1.904036 | <a href="https://www.genecards.org/cgi-bin/carddisp.pl?gene=LINC01818">https://www.genecards.org/cgi-bin/carddisp.pl?gene=LINC01818</a>           |
| Inc-TRIB1-8    |                                                  | RNA Gene          | 3  | GC08P125497 | 1.904036 | <a href="https://www.genecards.org/cgi-bin/carddisp.pl?gene=Inc-TRIB1-8">https://www.genecards.org/cgi-bin/carddisp.pl?gene=Inc-TRIB1-8</a>       |
| piR-37045      |                                                  | RNA Gene          | 2  | GC22P044002 | 1.904036 | <a href="https://www.genecards.org/cgi-bin/carddisp.pl?gene=piR-37045">https://www.genecards.org/cgi-bin/carddisp.pl?gene=piR-37045</a>           |
| HSALNG0135823  |                                                  | RNA Gene          | 2  | GC22P043995 | 1.904036 | <a href="https://www.genecards.org/cgi-bin/carddisp.pl?gene=HSALNG0135823">https://www.genecards.org/cgi-bin/carddisp.pl?gene=HSALNG0135823</a>   |
| piR-39858-368  |                                                  | RNA Gene          | 2  | GC20M016549 | 1.904036 | <a href="https://www.genecards.org/cgi-bin/carddisp.pl?gene=piR-39858-368">https://www.genecards.org/cgi-bin/carddisp.pl?gene=piR-39858-368</a>   |
| TUBA4B         | Tubulin Alpha 4b                                 | Protein Coding    | 25 | GC02P219253 | 1.902668 | <a href="https://www.genecards.org/cgi-bin/carddisp.pl?gene=TUBA4B">https://www.genecards.org/cgi-bin/carddisp.pl?gene=TUBA4B</a>                 |
| LOC109279247   | FGF21/FUT1 Promoter Region                       | Biological Region | 1  | GC19P048783 | 1.896202 | <a href="https://www.genecards.org/cgi-bin/carddisp.pl?gene=LOC109279247">https://www.genecards.org/cgi-bin/carddisp.pl?gene=LOC109279247</a>     |
| LINC02789      | Long Intergenic Non-Protein Coding RNA 2789      | RNA Gene          | 8  | GC01P199149 | 1.891777 | <a href="https://www.genecards.org/cgi-bin/carddisp.pl?gene=LINC02789">https://www.genecards.org/cgi-bin/carddisp.pl?gene=LINC02789</a>           |

|                 |                                                                                                      |                |    |             |          |                                                                                                                                                     |
|-----------------|------------------------------------------------------------------------------------------------------|----------------|----|-------------|----------|-----------------------------------------------------------------------------------------------------------------------------------------------------|
| SCGB3A1         | Secretoglobin Family 3A Member 1                                                                     | Protein Coding | 36 | GC05M180590 | 1.888189 | <a href="https://www.genecards.org/cgi-bin/carddisp.pl?gene=SCGB3A1">https://www.genecards.org/cgi-bin/carddisp.pl?gene=SCGB3A1</a>                 |
| H2BC3           | H2B Clustered Histone 3                                                                              | Protein Coding | 29 | GC06M026044 | 1.885311 | <a href="https://www.genecards.org/cgi-bin/carddisp.pl?gene=H2BC3">https://www.genecards.org/cgi-bin/carddisp.pl?gene=H2BC3</a>                     |
| HCAR3           | Hydroxycarboxylic Acid Receptor 3                                                                    | Protein Coding | 37 | GC12M122714 | 1.885262 | <a href="https://www.genecards.org/cgi-bin/carddisp.pl?gene=HCAR3">https://www.genecards.org/cgi-bin/carddisp.pl?gene=HCAR3</a>                     |
| EGOT            | Eosinophil Granule Ontogeny Transcript Basic Helix-Loop-Helix Family Member E41                      | RNA Gene       | 20 | GC03M004790 | 1.88261  | <a href="https://www.genecards.org/cgi-bin/carddisp.pl?gene=EGOT">https://www.genecards.org/cgi-bin/carddisp.pl?gene=EGOT</a>                       |
| BHLHE41         | H2A Clustered Histone 13                                                                             | Protein Coding | 41 | GC12M026120 | 1.879044 | <a href="https://www.genecards.org/cgi-bin/carddisp.pl?gene=BHLHE41">https://www.genecards.org/cgi-bin/carddisp.pl?gene=BHLHE41</a>                 |
| H2AC13          | CYP17A1                                                                                              | Protein Coding | 30 | GC06P055045 | 1.877702 | <a href="https://www.genecards.org/cgi-bin/carddisp.pl?gene=H2AC13">https://www.genecards.org/cgi-bin/carddisp.pl?gene=H2AC13</a>                   |
| CYP17A1-AS1     | Antisense RNA 1                                                                                      | RNA Gene       | 13 | GC10P102747 | 1.877188 | <a href="https://www.genecards.org/cgi-bin/carddisp.pl?gene=CYP17A1-AS1">https://www.genecards.org/cgi-bin/carddisp.pl?gene=CYP17A1-AS1</a>         |
| PHLPP2          | PH Domain And Leucine Rich Repeat Protein Phosphatase 2 Family With Sequence Similarity 166 Member B | Protein Coding | 41 | GC16M071637 | 1.875508 | <a href="https://www.genecards.org/cgi-bin/carddisp.pl?gene=PHLPP2">https://www.genecards.org/cgi-bin/carddisp.pl?gene=PHLPP2</a>                   |
| FAM166B         | Neuroblastoma Associated Transcript 1                                                                | Protein Coding | 30 | GC09M035554 | 1.871372 | <a href="https://www.genecards.org/cgi-bin/carddisp.pl?gene=FAM166B">https://www.genecards.org/cgi-bin/carddisp.pl?gene=FAM166B</a>                 |
| NBAT1           | Lysine Demethylase 1B                                                                                | RNA Gene       | 15 | GC06M022137 | 1.871232 | <a href="https://www.genecards.org/cgi-bin/carddisp.pl?gene=NBAT1">https://www.genecards.org/cgi-bin/carddisp.pl?gene=NBAT1</a>                     |
| KDM1B           | Long Intergenic Non-Protein Coding RNA 339                                                           | Protein Coding | 37 | GC06P018156 | 1.867278 | <a href="https://www.genecards.org/cgi-bin/carddisp.pl?gene=KDM1B">https://www.genecards.org/cgi-bin/carddisp.pl?gene=KDM1B</a>                     |
| LINC00339       |                                                                                                      | RNA Gene       | 19 | GC01P022111 | 1.862254 | <a href="https://www.genecards.org/cgi-bin/carddisp.pl?gene=LINC00339">https://www.genecards.org/cgi-bin/carddisp.pl?gene=LINC00339</a>             |
| ENSG00000248537 |                                                                                                      | RNA Gene       | 7  | GC05P009363 | 1.855609 | <a href="https://www.genecards.org/cgi-bin/carddisp.pl?gene=ENSG00000248537">https://www.genecards.org/cgi-bin/carddisp.pl?gene=ENSG00000248537</a> |
| ENSG00000250001 |                                                                                                      | RNA Gene       | 7  | GC05M009519 | 1.855609 | <a href="https://www.genecards.org/cgi-bin/carddisp.pl?gene=ENSG00000250001">https://www.genecards.org/cgi-bin/carddisp.pl?gene=ENSG00000250001</a> |
| HNRNPA1P58      | Heterogeneous Nuclear Ribonucleoprotein A1 Pseudogene 58                                             | Pseudogene     | 4  | GC06P024003 | 1.855609 | <a href="https://www.genecards.org/cgi-bin/carddisp.pl?gene=HNRNPA1P58">https://www.genecards.org/cgi-bin/carddisp.pl?gene=HNRNPA1P58</a>           |
| LOC101060035    | DnaJ Homolog Subfamily C Member 24 Pseudogene                                                        | Pseudogene     | 4  | GC05M133720 | 1.855609 | <a href="https://www.genecards.org/cgi-bin/carddisp.pl?gene=LOC101060035">https://www.genecards.org/cgi-bin/carddisp.pl?gene=LOC101060035</a>       |

|                 |                                                   |                |    |             |          |                                                                                                                                                     |
|-----------------|---------------------------------------------------|----------------|----|-------------|----------|-----------------------------------------------------------------------------------------------------------------------------------------------------|
| HSALNG0040068   |                                                   | RNA Gene       | 4  | GC05M009421 | 1.855609 | <a href="https://www.genecards.org/cgi-bin/carddisp.pl?gene=HSALNG0040068">https://www.genecards.org/cgi-bin/carddisp.pl?gene=HSALNG0040068</a>     |
| Inc-PPP1CC-3    |                                                   | RNA Gene       | 4  | GC12M110993 | 1.855609 | <a href="https://www.genecards.org/cgi-bin/carddisp.pl?gene=Inc-PPP1CC-3">https://www.genecards.org/cgi-bin/carddisp.pl?gene=Inc-PPP1CC-3</a>       |
| SLC16A7         | Solute Carrier Family 16 Member 7                 | Protein Coding | 44 | GC12P059596 | 1.855354 | <a href="https://www.genecards.org/cgi-bin/carddisp.pl?gene=SLC16A7">https://www.genecards.org/cgi-bin/carddisp.pl?gene=SLC16A7</a>                 |
| MOSPD2          | Motile Sperm Domain Containing 2                  | Protein Coding | 34 | GC0XP014891 | 1.850319 | <a href="https://www.genecards.org/cgi-bin/carddisp.pl?gene=MOSPD2">https://www.genecards.org/cgi-bin/carddisp.pl?gene=MOSPD2</a>                   |
| LINC00888       | Long Intergenic Non-Protein Coding RNA 888        | RNA Gene       | 13 | GC03P183447 | 1.849543 | <a href="https://www.genecards.org/cgi-bin/carddisp.pl?gene=LINC00888">https://www.genecards.org/cgi-bin/carddisp.pl?gene=LINC00888</a>             |
| MCTS1           | MCTS1 Re-Initiation And Release Factor            | Protein Coding | 36 | GC0XP120594 | 1.84765  | <a href="https://www.genecards.org/cgi-bin/carddisp.pl?gene=MCTS1">https://www.genecards.org/cgi-bin/carddisp.pl?gene=MCTS1</a>                     |
| H2AC8           | H2A Clustered Histone 8                           | Protein Coding | 27 | GC06P055580 | 1.845765 | <a href="https://www.genecards.org/cgi-bin/carddisp.pl?gene=H2AC8">https://www.genecards.org/cgi-bin/carddisp.pl?gene=H2AC8</a>                     |
| LINC01090       | Long Intergenic Non-Protein Coding RNA 1090       | RNA Gene       | 13 | GC02M187712 | 1.843315 | <a href="https://www.genecards.org/cgi-bin/carddisp.pl?gene=LINC01090">https://www.genecards.org/cgi-bin/carddisp.pl?gene=LINC01090</a>             |
| ENSG00000274121 |                                                   | RNA Gene       | 5  | GC01P231814 | 1.843315 | <a href="https://www.genecards.org/cgi-bin/carddisp.pl?gene=ENSG00000274121">https://www.genecards.org/cgi-bin/carddisp.pl?gene=ENSG00000274121</a> |
| DNAJC10         | DnaJ Heat Shock Protein Family (Hsp40) Member C10 | Protein Coding | 38 | GC02P182716 | 1.831709 | <a href="https://www.genecards.org/cgi-bin/carddisp.pl?gene=DNAJC10">https://www.genecards.org/cgi-bin/carddisp.pl?gene=DNAJC10</a>                 |
| LINC00901       | Long Intergenic Non-Protein Coding RNA 901        | RNA Gene       | 15 | GC03P116911 | 1.829658 | <a href="https://www.genecards.org/cgi-bin/carddisp.pl?gene=LINC00901">https://www.genecards.org/cgi-bin/carddisp.pl?gene=LINC00901</a>             |
| C5orf67         | Chromosome 5 Putative Open Reading Frame 67       | RNA Gene       | 18 | GC05M056511 | 1.827172 | <a href="https://www.genecards.org/cgi-bin/carddisp.pl?gene=C5orf67">https://www.genecards.org/cgi-bin/carddisp.pl?gene=C5orf67</a>                 |
| APOL5           | Apolipoprotein L5                                 | Protein Coding | 34 | GC22P035713 | 1.822159 | <a href="https://www.genecards.org/cgi-bin/carddisp.pl?gene=APOL5">https://www.genecards.org/cgi-bin/carddisp.pl?gene=APOL5</a>                     |
| HMGN2           | High Mobility Group Nucleosomal Binding Domain 2  | Protein Coding | 39 | GC01P026473 | 1.813986 | <a href="https://www.genecards.org/cgi-bin/carddisp.pl?gene=HMGN2">https://www.genecards.org/cgi-bin/carddisp.pl?gene=HMGN2</a>                     |
| WSB1            | WD Repeat And SOCS Box Containing 1               | Protein Coding | 40 | GC17P027294 | 1.796367 | <a href="https://www.genecards.org/cgi-bin/carddisp.pl?gene=WSB1">https://www.genecards.org/cgi-bin/carddisp.pl?gene=WSB1</a>                       |
| MIR378C         | MicroRNA 378c                                     | RNA Gene       | 13 | GC10M130962 | 1.79261  | <a href="https://www.genecards.org/cgi-bin/carddisp.pl?gene=MIR378C">https://www.genecards.org/cgi-bin/carddisp.pl?gene=MIR378C</a>                 |

|                 |                                                        |                |    |             |          |                                                                                                                                                     |
|-----------------|--------------------------------------------------------|----------------|----|-------------|----------|-----------------------------------------------------------------------------------------------------------------------------------------------------|
| SLC23A4P        | Solute Carrier Family 23 Member 4, Pseudogene          | Pseudogene     | 7  | GC07M135247 | 1.792313 | <a href="https://www.genecards.org/cgi-bin/carddisp.pl?gene=SLC23A4P">https://www.genecards.org/cgi-bin/carddisp.pl?gene=SLC23A4P</a>               |
| LINC00511       | Long Intergenic Non-Protein Coding RNA 511             | RNA Gene       | 17 | GC17M072323 | 1.789853 | <a href="https://www.genecards.org/cgi-bin/carddisp.pl?gene=LINC00511">https://www.genecards.org/cgi-bin/carddisp.pl?gene=LINC00511</a>             |
| MIR4772         | MicroRNA 4772                                          | RNA Gene       | 13 | GC02P102432 | 1.777629 | <a href="https://www.genecards.org/cgi-bin/carddisp.pl?gene=MIR4772">https://www.genecards.org/cgi-bin/carddisp.pl?gene=MIR4772</a>                 |
| LINC01234       | Long Intergenic Non-Protein Coding RNA 1234            | RNA Gene       | 15 | GC12M113584 | 1.768183 | <a href="https://www.genecards.org/cgi-bin/carddisp.pl?gene=LINC01234">https://www.genecards.org/cgi-bin/carddisp.pl?gene=LINC01234</a>             |
| DGKD            | Diacylglycerol Kinase Delta                            | Protein Coding | 44 | GC02P233356 | 1.764671 | <a href="https://www.genecards.org/cgi-bin/carddisp.pl?gene=DGKD">https://www.genecards.org/cgi-bin/carddisp.pl?gene=DGKD</a>                       |
| LINC00993       | Long Intergenic Non-Protein Coding RNA 993             | RNA Gene       | 13 | GC10P037249 | 1.76328  | <a href="https://www.genecards.org/cgi-bin/carddisp.pl?gene=LINC00993">https://www.genecards.org/cgi-bin/carddisp.pl?gene=LINC00993</a>             |
| MTRNR2L6        | MT-RNR2 Like 6                                         | Protein Coding | 19 | GC07P145773 | 1.756919 | <a href="https://www.genecards.org/cgi-bin/carddisp.pl?gene=MTRNR2L6">https://www.genecards.org/cgi-bin/carddisp.pl?gene=MTRNR2L6</a>               |
| PDP2            | Pyruvate Dehydrogenase Phosphatase Catalytic Subunit 2 | Protein Coding | 39 | GC16P066881 | 1.752393 | <a href="https://www.genecards.org/cgi-bin/carddisp.pl?gene=PDP2">https://www.genecards.org/cgi-bin/carddisp.pl?gene=PDP2</a>                       |
| ENSG00000266602 |                                                        | RNA Gene       | 7  | GC18P001509 | 1.750862 | <a href="https://www.genecards.org/cgi-bin/carddisp.pl?gene=ENSG00000266602">https://www.genecards.org/cgi-bin/carddisp.pl?gene=ENSG00000266602</a> |
| H2AW            | H2A.W Histone                                          | Protein Coding | 29 | GC01M228478 | 1.747616 | <a href="https://www.genecards.org/cgi-bin/carddisp.pl?gene=H2AW">https://www.genecards.org/cgi-bin/carddisp.pl?gene=H2AW</a>                       |
| CPB2-AS1        | CPB2 Antisense RNA 1                                   | RNA Gene       | 14 | GC13P046052 | 1.741461 | <a href="https://www.genecards.org/cgi-bin/carddisp.pl?gene=CPB2-AS1">https://www.genecards.org/cgi-bin/carddisp.pl?gene=CPB2-AS1</a>               |
| LINC01029       | Long Intergenic Non-Protein Coding RNA 1029            | RNA Gene       | 12 | GC18M077972 | 1.741461 | <a href="https://www.genecards.org/cgi-bin/carddisp.pl?gene=LINC01029">https://www.genecards.org/cgi-bin/carddisp.pl?gene=LINC01029</a>             |
| HDHD5-AS1       | HDHD5 Antisense RNA 1                                  | RNA Gene       | 12 | GC22P017160 | 1.741461 | <a href="https://www.genecards.org/cgi-bin/carddisp.pl?gene=HDHD5-AS1">https://www.genecards.org/cgi-bin/carddisp.pl?gene=HDHD5-AS1</a>             |
| LINC02534       | Long Intergenic Non-Protein Coding RNA 2534            | RNA Gene       | 9  | GC06M115635 | 1.741461 | <a href="https://www.genecards.org/cgi-bin/carddisp.pl?gene=LINC02534">https://www.genecards.org/cgi-bin/carddisp.pl?gene=LINC02534</a>             |
| LINC02392       | Long Intergenic Non-Protein Coding RNA 2392            | RNA Gene       | 9  | GC12P090282 | 1.741461 | <a href="https://www.genecards.org/cgi-bin/carddisp.pl?gene=LINC02392">https://www.genecards.org/cgi-bin/carddisp.pl?gene=LINC02392</a>             |



|                 |                                             |                |   |             |          |                                                                                                                                                     |
|-----------------|---------------------------------------------|----------------|---|-------------|----------|-----------------------------------------------------------------------------------------------------------------------------------------------------|
| SNORA63E        | Small Nucleolar RNA, H/ACA Box 63E          | RNA Gene       | 9 | GC03P183457 | 1.741461 | <a href="https://www.genecards.org/cgi-bin/carddisp.pl?gene=SNORA63E">https://www.genecards.org/cgi-bin/carddisp.pl?gene=SNORA63E</a>               |
| SNORA63D        | Small Nucleolar RNA, H/ACA Box 63D          | RNA Gene       | 8 | GC03P183470 | 1.741461 | <a href="https://www.genecards.org/cgi-bin/carddisp.pl?gene=SNORA63D">https://www.genecards.org/cgi-bin/carddisp.pl?gene=SNORA63D</a>               |
| ENSG00000243273 |                                             | RNA Gene       | 8 | GC03P150764 | 1.741461 | <a href="https://www.genecards.org/cgi-bin/carddisp.pl?gene=ENSG00000243273">https://www.genecards.org/cgi-bin/carddisp.pl?gene=ENSG00000243273</a> |
| ENSG00000251152 |                                             | RNA Gene       | 7 | GC04P014575 | 1.741461 | <a href="https://www.genecards.org/cgi-bin/carddisp.pl?gene=ENSG00000251152">https://www.genecards.org/cgi-bin/carddisp.pl?gene=ENSG00000251152</a> |
| ENSG00000249664 |                                             | RNA Gene       | 7 | GC05M083012 | 1.741461 | <a href="https://www.genecards.org/cgi-bin/carddisp.pl?gene=ENSG00000249664">https://www.genecards.org/cgi-bin/carddisp.pl?gene=ENSG00000249664</a> |
| ENSG00000251186 |                                             | RNA Gene       | 7 | GC04M008455 | 1.741461 | <a href="https://www.genecards.org/cgi-bin/carddisp.pl?gene=ENSG00000251186">https://www.genecards.org/cgi-bin/carddisp.pl?gene=ENSG00000251186</a> |
| ENSG00000260234 |                                             | Protein Coding | 7 | GC03M150882 | 1.741461 | <a href="https://www.genecards.org/cgi-bin/carddisp.pl?gene=ENSG00000260234">https://www.genecards.org/cgi-bin/carddisp.pl?gene=ENSG00000260234</a> |
| LINC02822       | Long Intergenic Non-Protein Coding RNA 2822 | RNA Gene       | 6 | GC12P090411 | 1.741461 | <a href="https://www.genecards.org/cgi-bin/carddisp.pl?gene=LINC02822">https://www.genecards.org/cgi-bin/carddisp.pl?gene=LINC02822</a>             |
| ENSG00000252040 |                                             | RNA Gene       | 6 | GC16M068630 | 1.741461 | <a href="https://www.genecards.org/cgi-bin/carddisp.pl?gene=ENSG00000252040">https://www.genecards.org/cgi-bin/carddisp.pl?gene=ENSG00000252040</a> |
| ENSG00000253092 |                                             | RNA Gene       | 6 | GC03P183452 | 1.741461 | <a href="https://www.genecards.org/cgi-bin/carddisp.pl?gene=ENSG00000253092">https://www.genecards.org/cgi-bin/carddisp.pl?gene=ENSG00000253092</a> |
| ENSG00000253354 |                                             | RNA Gene       | 6 | GC08P040370 | 1.741461 | <a href="https://www.genecards.org/cgi-bin/carddisp.pl?gene=ENSG00000253354">https://www.genecards.org/cgi-bin/carddisp.pl?gene=ENSG00000253354</a> |
| ENSG00000272479 |                                             | RNA Gene       | 6 | GC08M040519 | 1.741461 | <a href="https://www.genecards.org/cgi-bin/carddisp.pl?gene=ENSG00000272479">https://www.genecards.org/cgi-bin/carddisp.pl?gene=ENSG00000272479</a> |
| ENSG00000234481 |                                             | RNA Gene       | 6 | GC01P036773 | 1.741461 | <a href="https://www.genecards.org/cgi-bin/carddisp.pl?gene=ENSG00000234481">https://www.genecards.org/cgi-bin/carddisp.pl?gene=ENSG00000234481</a> |
| ENSG00000241679 |                                             | RNA Gene       | 6 | GC03P143123 | 1.741461 | <a href="https://www.genecards.org/cgi-bin/carddisp.pl?gene=ENSG00000241679">https://www.genecards.org/cgi-bin/carddisp.pl?gene=ENSG00000241679</a> |
| RPL35AP33       | Ribosomal Protein L35a Pseudogene 33        | Pseudogene     | 6 | GC16M068489 | 1.741461 | <a href="https://www.genecards.org/cgi-bin/carddisp.pl?gene=RPL35AP33">https://www.genecards.org/cgi-bin/carddisp.pl?gene=RPL35AP33</a>             |
| RNU6-655P       | RNA, U6 Small Nuclear 655, Pseudogene       | Pseudogene     | 6 | GC18P078036 | 1.741461 | <a href="https://www.genecards.org/cgi-bin/carddisp.pl?gene=RNU6-655P">https://www.genecards.org/cgi-bin/carddisp.pl?gene=RNU6-655P</a>             |
| LGMNP1          | Legumain Pseudogene 1                       | Pseudogene     | 6 | GC13M064957 | 1.741461 | <a href="https://www.genecards.org/cgi-bin/carddisp.pl?gene=LGMNP1">https://www.genecards.org/cgi-bin/carddisp.pl?gene=LGMNP1</a>                   |
| ENSG00000248112 |                                             | RNA Gene       | 6 | GC05M082907 | 1.741461 | <a href="https://www.genecards.org/cgi-bin/carddisp.pl?gene=ENSG00000248112">https://www.genecards.org/cgi-bin/carddisp.pl?gene=ENSG00000248112</a> |

|                     |                                                                                       |                   |   |                 |          |                                                                                                                                                     |
|---------------------|---------------------------------------------------------------------------------------|-------------------|---|-----------------|----------|-----------------------------------------------------------------------------------------------------------------------------------------------------|
| HNRNPA3<br>P5       | Heterogeneous<br>Nuclear<br>Ribonucleoprotein A3<br>Pseudogene 5                      | Pseudogene        | 5 | GC13M065<br>787 | 1.741461 | <a href="https://www.genecards.org/cgi-bin/carddisp.pl?gene=HNRNPA3P5">https://www.genecards.org/cgi-bin/carddisp.pl?gene=HNRNPA3P5</a>             |
| ENSG0000<br>0259080 |                                                                                       | RNA<br>Gene       | 5 | GC02P0275<br>83 | 1.741461 | <a href="https://www.genecards.org/cgi-bin/carddisp.pl?gene=ENSG00000259080">https://www.genecards.org/cgi-bin/carddisp.pl?gene=ENSG00000259080</a> |
| ENSG0000<br>0254171 |                                                                                       | RNA<br>Gene       | 5 | GC05P1661<br>28 | 1.741461 | <a href="https://www.genecards.org/cgi-bin/carddisp.pl?gene=ENSG00000254171">https://www.genecards.org/cgi-bin/carddisp.pl?gene=ENSG00000254171</a> |
| ENSG0000<br>0251730 |                                                                                       | RNA<br>Gene       | 5 | GC03P1834<br>54 | 1.741461 | <a href="https://www.genecards.org/cgi-bin/carddisp.pl?gene=ENSG00000251730">https://www.genecards.org/cgi-bin/carddisp.pl?gene=ENSG00000251730</a> |
| ENSG0000<br>0197462 |                                                                                       | RNA<br>Gene       | 5 | GC07P1259<br>17 | 1.741461 | <a href="https://www.genecards.org/cgi-bin/carddisp.pl?gene=ENSG00000197462">https://www.genecards.org/cgi-bin/carddisp.pl?gene=ENSG00000197462</a> |
| ENSG0000<br>0234034 |                                                                                       | RNA<br>Gene       | 5 | GC21M022<br>500 | 1.741461 | <a href="https://www.genecards.org/cgi-bin/carddisp.pl?gene=ENSG00000234034">https://www.genecards.org/cgi-bin/carddisp.pl?gene=ENSG00000234034</a> |
| ENSG0000<br>0235503 |                                                                                       | RNA<br>Gene       | 5 | GC07P0833<br>55 | 1.741461 | <a href="https://www.genecards.org/cgi-bin/carddisp.pl?gene=ENSG00000235503">https://www.genecards.org/cgi-bin/carddisp.pl?gene=ENSG00000235503</a> |
| LOC10798<br>7158    | Uncharacterized<br>LOC107987158<br>Mitochondrial                                      | Protein<br>Coding | 5 | GC11M003<br>142 | 1.741461 | <a href="https://www.genecards.org/cgi-bin/carddisp.pl?gene=LOC107987158">https://www.genecards.org/cgi-bin/carddisp.pl?gene=LOC107987158</a>       |
| MRPL45P1            | Ribosomal<br>Protein L45<br>Pseudogene 1                                              | Pseudogene        | 5 | GC02M088<br>428 | 1.741461 | <a href="https://www.genecards.org/cgi-bin/carddisp.pl?gene=MRPL45P1">https://www.genecards.org/cgi-bin/carddisp.pl?gene=MRPL45P1</a>               |
| RPL23AP2<br>0       | Ribosomal<br>Protein L23a<br>Pseudogene 20                                            | Pseudogene        | 5 | GC01P2419<br>16 | 1.741461 | <a href="https://www.genecards.org/cgi-bin/carddisp.pl?gene=RPL23AP20">https://www.genecards.org/cgi-bin/carddisp.pl?gene=RPL23AP20</a>             |
| RNU6-<br>1172P      | RNA, U6 Small<br>Nuclear 1172,<br>Pseudogene                                          | Pseudogene        | 5 | GC08M096<br>431 | 1.741461 | <a href="https://www.genecards.org/cgi-bin/carddisp.pl?gene=RNU6-1172P">https://www.genecards.org/cgi-bin/carddisp.pl?gene=RNU6-1172P</a>           |
| Inc-<br>PNPLA5-3    |                                                                                       | RNA<br>Gene       | 5 | GC22M048<br>943 | 1.741461 | <a href="https://www.genecards.org/cgi-bin/carddisp.pl?gene=Inc-PNPLA5-3">https://www.genecards.org/cgi-bin/carddisp.pl?gene=Inc-PNPLA5-3</a>       |
| ENSG0000<br>0271682 |                                                                                       | Pseudogene        | 4 | GC03M183<br>462 | 1.741461 | <a href="https://www.genecards.org/cgi-bin/carddisp.pl?gene=ENSG00000271682">https://www.genecards.org/cgi-bin/carddisp.pl?gene=ENSG00000271682</a> |
| ENSG0000<br>0233983 |                                                                                       | Pseudogene        | 4 | GC01P0994<br>64 | 1.741461 | <a href="https://www.genecards.org/cgi-bin/carddisp.pl?gene=ENSG00000233983">https://www.genecards.org/cgi-bin/carddisp.pl?gene=ENSG00000233983</a> |
| Inc-<br>TSNAX-2     |                                                                                       | RNA<br>Gene       | 4 | GC01P2316<br>93 | 1.741461 | <a href="https://www.genecards.org/cgi-bin/carddisp.pl?gene=Inc-TSNAX-2">https://www.genecards.org/cgi-bin/carddisp.pl?gene=Inc-TSNAX-2</a>         |
| SDR42E1P<br>5       | Short Chain<br>Dehydrogenase<br>/Reductase<br>Family 42E,<br>Member 1<br>Pseudogene 5 | Pseudogene        | 4 | GC02P1024<br>12 | 1.741461 | <a href="https://www.genecards.org/cgi-bin/carddisp.pl?gene=SDR42E1P5">https://www.genecards.org/cgi-bin/carddisp.pl?gene=SDR42E1P5</a>             |
| ENSG0000<br>0288092 |                                                                                       | RNA<br>Gene       | 4 | GC12P1030<br>13 | 1.741461 | <a href="https://www.genecards.org/cgi-bin/carddisp.pl?gene=ENSG00000288092">https://www.genecards.org/cgi-bin/carddisp.pl?gene=ENSG00000288092</a> |

|                 |            |   |             |          |                                                                                                                                                     |
|-----------------|------------|---|-------------|----------|-----------------------------------------------------------------------------------------------------------------------------------------------------|
| lnc-FAM122A-1   | RNA Gene   | 4 | GC09P068711 | 1.741461 | <a href="https://www.genecards.org/cgi-bin/carddisp.pl?gene=lnc-FAM122A-1">https://www.genecards.org/cgi-bin/carddisp.pl?gene=lnc-FAM122A-1</a>     |
| lnc-MRGPRG-1    | RNA Gene   | 4 | GC11M003146 | 1.741461 | <a href="https://www.genecards.org/cgi-bin/carddisp.pl?gene=lnc-MRGPRG-1">https://www.genecards.org/cgi-bin/carddisp.pl?gene=lnc-MRGPRG-1</a>       |
| lnc-RHOB-11     | RNA Gene   | 4 | GC02P020182 | 1.741461 | <a href="https://www.genecards.org/cgi-bin/carddisp.pl?gene=lnc-RHOB-11">https://www.genecards.org/cgi-bin/carddisp.pl?gene=lnc-RHOB-11</a>         |
| lnc-SLC46A3-1   | RNA Gene   | 4 | GC13M028701 | 1.741461 | <a href="https://www.genecards.org/cgi-bin/carddisp.pl?gene=lnc-SLC46A3-1">https://www.genecards.org/cgi-bin/carddisp.pl?gene=lnc-SLC46A3-1</a>     |
| lnc-WDR91-4     | RNA Gene   | 4 | GC07M135225 | 1.741461 | <a href="https://www.genecards.org/cgi-bin/carddisp.pl?gene=lnc-WDR91-4">https://www.genecards.org/cgi-bin/carddisp.pl?gene=lnc-WDR91-4</a>         |
| HSALNG0071703   | RNA Gene   | 4 | GC09M068727 | 1.741461 | <a href="https://www.genecards.org/cgi-bin/carddisp.pl?gene=HSALNG0071703">https://www.genecards.org/cgi-bin/carddisp.pl?gene=HSALNG0071703</a>     |
| lnc-MYL2-4      | RNA Gene   | 4 | GC12M110918 | 1.741461 | <a href="https://www.genecards.org/cgi-bin/carddisp.pl?gene=lnc-MYL2-4">https://www.genecards.org/cgi-bin/carddisp.pl?gene=lnc-MYL2-4</a>           |
| MN309223        | RNA Gene   | 4 | GC11P003129 | 1.741461 | <a href="https://www.genecards.org/cgi-bin/carddisp.pl?gene=MN309223">https://www.genecards.org/cgi-bin/carddisp.pl?gene=MN309223</a>               |
| ENSG00000275383 | RNA Gene   | 3 | GC16P068591 | 1.741461 | <a href="https://www.genecards.org/cgi-bin/carddisp.pl?gene=ENSG00000275383">https://www.genecards.org/cgi-bin/carddisp.pl?gene=ENSG00000275383</a> |
| ENSG00000225906 | Pseudogene | 3 | GC21P022882 | 1.741461 | <a href="https://www.genecards.org/cgi-bin/carddisp.pl?gene=ENSG00000225906">https://www.genecards.org/cgi-bin/carddisp.pl?gene=ENSG00000225906</a> |
| ENSG00000231984 | Pseudogene | 3 | GC01P199753 | 1.741461 | <a href="https://www.genecards.org/cgi-bin/carddisp.pl?gene=ENSG00000231984">https://www.genecards.org/cgi-bin/carddisp.pl?gene=ENSG00000231984</a> |
| HSALNG0017419   | RNA Gene   | 3 | GC02P102419 | 1.741461 | <a href="https://www.genecards.org/cgi-bin/carddisp.pl?gene=HSALNG0017419">https://www.genecards.org/cgi-bin/carddisp.pl?gene=HSALNG0017419</a>     |
| ENSG00000287720 | RNA Gene   | 3 | GC03P003918 | 1.741461 | <a href="https://www.genecards.org/cgi-bin/carddisp.pl?gene=ENSG00000287720">https://www.genecards.org/cgi-bin/carddisp.pl?gene=ENSG00000287720</a> |
| lnc-BICD1-6     | RNA Gene   | 3 | GC12P031995 | 1.741461 | <a href="https://www.genecards.org/cgi-bin/carddisp.pl?gene=lnc-BICD1-6">https://www.genecards.org/cgi-bin/carddisp.pl?gene=lnc-BICD1-6</a>         |
| HSALNG0023242   | RNA Gene   | 3 | GC02M235672 | 1.741461 | <a href="https://www.genecards.org/cgi-bin/carddisp.pl?gene=HSALNG0023242">https://www.genecards.org/cgi-bin/carddisp.pl?gene=HSALNG0023242</a>     |
| HSALNG0113292   | RNA Gene   | 3 | GC16P086387 | 1.741461 | <a href="https://www.genecards.org/cgi-bin/carddisp.pl?gene=HSALNG0113292">https://www.genecards.org/cgi-bin/carddisp.pl?gene=HSALNG0113292</a>     |
| HSALNG0113293   | RNA Gene   | 3 | GC16M086387 | 1.741461 | <a href="https://www.genecards.org/cgi-bin/carddisp.pl?gene=HSALNG0113293">https://www.genecards.org/cgi-bin/carddisp.pl?gene=HSALNG0113293</a>     |
| NONHSA013110.2  | RNA Gene   | 3 | GC13P028704 | 1.741461 | <a href="https://www.genecards.org/cgi-bin/carddisp.pl?gene=NONHSA013110.2">https://www.genecards.org/cgi-bin/carddisp.pl?gene=NONHSA013110.2</a>   |
| lnc-SLC22A18-7  | RNA Gene   | 3 | GC11P003146 | 1.741461 | <a href="https://www.genecards.org/cgi-bin/carddisp.pl?gene=lnc-SLC22A18-7">https://www.genecards.org/cgi-bin/carddisp.pl?gene=lnc-SLC22A18-7</a>   |

|                  |                              |               |   |             |          |                                                                                                                                                       |
|------------------|------------------------------|---------------|---|-------------|----------|-------------------------------------------------------------------------------------------------------------------------------------------------------|
| HSALNG0071704    |                              | RNA Gene      | 3 | GC09M068734 | 1.741461 | <a href="https://www.genecards.org/cgi-bin/carddisp.pl?gene=HSALNG0071704">https://www.genecards.org/cgi-bin/carddisp.pl?gene=HSALNG0071704</a>       |
| hsa-miR-5096-076 |                              | RNA Gene      | 3 | GC07M004224 | 1.741461 | <a href="https://www.genecards.org/cgi-bin/carddisp.pl?gene=hsa-miR-5096-076">https://www.genecards.org/cgi-bin/carddisp.pl?gene=hsa-miR-5096-076</a> |
| lnc-KLHL24-6     |                              | RNA Gene      | 3 | GC03P183484 | 1.741461 | <a href="https://www.genecards.org/cgi-bin/carddisp.pl?gene=lnc-KLHL24-6">https://www.genecards.org/cgi-bin/carddisp.pl?gene=lnc-KLHL24-6</a>         |
| piR-50443-100    |                              | RNA Gene      | 3 | GC13P046157 | 1.741461 | <a href="https://www.genecards.org/cgi-bin/carddisp.pl?gene=piR-50443-100">https://www.genecards.org/cgi-bin/carddisp.pl?gene=piR-50443-100</a>       |
| piR-61101-044    |                              | RNA Gene      | 3 | GC10M015274 | 1.741461 | <a href="https://www.genecards.org/cgi-bin/carddisp.pl?gene=piR-61101-044">https://www.genecards.org/cgi-bin/carddisp.pl?gene=piR-61101-044</a>       |
| ENSG00000280306  |                              | Uncategorized | 2 | GC16P020487 | 1.741461 | <a href="https://www.genecards.org/cgi-bin/carddisp.pl?gene=ENSG00000280306">https://www.genecards.org/cgi-bin/carddisp.pl?gene=ENSG00000280306</a>   |
| ENSG00000285529  |                              | RNA Gene      | 2 | GC10P130525 | 1.741461 | <a href="https://www.genecards.org/cgi-bin/carddisp.pl?gene=ENSG00000285529">https://www.genecards.org/cgi-bin/carddisp.pl?gene=ENSG00000285529</a>   |
| ENSG00000258506  |                              | Pseudogene    | 2 | GC14P084951 | 1.741461 | <a href="https://www.genecards.org/cgi-bin/carddisp.pl?gene=ENSG00000258506">https://www.genecards.org/cgi-bin/carddisp.pl?gene=ENSG00000258506</a>   |
| ENSG00000271078  |                              | Pseudogene    | 2 | GC15M032251 | 1.741461 | <a href="https://www.genecards.org/cgi-bin/carddisp.pl?gene=ENSG00000271078">https://www.genecards.org/cgi-bin/carddisp.pl?gene=ENSG00000271078</a>   |
| HSALNG0011461    |                              | RNA Gene      | 2 | GC01M231809 | 1.741461 | <a href="https://www.genecards.org/cgi-bin/carddisp.pl?gene=HSALNG0011461">https://www.genecards.org/cgi-bin/carddisp.pl?gene=HSALNG0011461</a>       |
| LOC105376433     | Uncharacterized LOC105376433 | RNA Gene      | 2 | GC10P015236 | 1.741461 | <a href="https://www.genecards.org/cgi-bin/carddisp.pl?gene=LOC105376433">https://www.genecards.org/cgi-bin/carddisp.pl?gene=LOC105376433</a>         |
| LOC107986000     | Uncharacterized LOC107986000 | RNA Gene      | 2 | GC02P235730 | 1.741461 | <a href="https://www.genecards.org/cgi-bin/carddisp.pl?gene=LOC107986000">https://www.genecards.org/cgi-bin/carddisp.pl?gene=LOC107986000</a>         |
| lnc-RASGRP1-1    |                              | RNA Gene      | 2 | GC15M038754 | 1.741461 | <a href="https://www.genecards.org/cgi-bin/carddisp.pl?gene=lnc-RASGRP1-1">https://www.genecards.org/cgi-bin/carddisp.pl?gene=lnc-RASGRP1-1</a>       |
| HSALNG0032698    |                              | RNA Gene      | 2 | GC04P007752 | 1.741461 | <a href="https://www.genecards.org/cgi-bin/carddisp.pl?gene=HSALNG0032698">https://www.genecards.org/cgi-bin/carddisp.pl?gene=HSALNG0032698</a>       |
| HSALNG0043115    |                              | RNA Gene      | 2 | GC05M082908 | 1.741461 | <a href="https://www.genecards.org/cgi-bin/carddisp.pl?gene=HSALNG0043115">https://www.genecards.org/cgi-bin/carddisp.pl?gene=HSALNG0043115</a>       |
| HSALNG0043127    |                              | RNA Gene      | 2 | GC05P083011 | 1.741461 | <a href="https://www.genecards.org/cgi-bin/carddisp.pl?gene=HSALNG0043127">https://www.genecards.org/cgi-bin/carddisp.pl?gene=HSALNG0043127</a>       |
| HSALNG0014027    |                              | RNA Gene      | 2 | GC02M031425 | 1.741461 | <a href="https://www.genecards.org/cgi-bin/carddisp.pl?gene=HSALNG0014027">https://www.genecards.org/cgi-bin/carddisp.pl?gene=HSALNG0014027</a>       |
| HSALNG0031159    |                              | RNA Gene      | 2 | GC03P183480 | 1.741461 | <a href="https://www.genecards.org/cgi-bin/carddisp.pl?gene=HSALNG0031159">https://www.genecards.org/cgi-bin/carddisp.pl?gene=HSALNG0031159</a>       |
| HSALNG0032696    |                              | RNA Gene      | 2 | GC04M007742 | 1.741461 | <a href="https://www.genecards.org/cgi-bin/carddisp.pl?gene=HSALNG0032696">https://www.genecards.org/cgi-bin/carddisp.pl?gene=HSALNG0032696</a>       |

|                   |                                    |                |    |             |          |                                                                                                                                                         |
|-------------------|------------------------------------|----------------|----|-------------|----------|---------------------------------------------------------------------------------------------------------------------------------------------------------|
| HSALNG0056551     |                                    | RNA Gene       | 2  | GC07M021497 | 1.741461 | <a href="https://www.genecards.org/cgi-bin/carddisp.pl?gene=HSALNG0056551">https://www.genecards.org/cgi-bin/carddisp.pl?gene=HSALNG0056551</a>         |
| HSALNG0061543     |                                    | RNA Gene       | 2  | GC07P135291 | 1.741461 | <a href="https://www.genecards.org/cgi-bin/carddisp.pl?gene=HSALNG0061543">https://www.genecards.org/cgi-bin/carddisp.pl?gene=HSALNG0061543</a>         |
| NONHSA0018421.2   |                                    | RNA Gene       | 2  | GC16P005964 | 1.741461 | <a href="https://www.genecards.org/cgi-bin/carddisp.pl?gene=NONHSAG018421.2">https://www.genecards.org/cgi-bin/carddisp.pl?gene=NONHSAG018421.2</a>     |
| piR-43105-110     |                                    | RNA Gene       | 2  | GC12P031998 | 1.741461 | <a href="https://www.genecards.org/cgi-bin/carddisp.pl?gene=piR-43105-110">https://www.genecards.org/cgi-bin/carddisp.pl?gene=piR-43105-110</a>         |
| piR-48799-012     |                                    | RNA Gene       | 2  | GC10P015269 | 1.741461 | <a href="https://www.genecards.org/cgi-bin/carddisp.pl?gene=piR-48799-012">https://www.genecards.org/cgi-bin/carddisp.pl?gene=piR-48799-012</a>         |
| RF00017-1289      |                                    | RNA Gene       | 2  | GC13P046130 | 1.741461 | <a href="https://www.genecards.org/cgi-bin/carddisp.pl?gene=RF00017-1289">https://www.genecards.org/cgi-bin/carddisp.pl?gene=RF00017-1289</a>           |
| piR-55036-040     |                                    | RNA Gene       | 2  | GC02P031489 | 1.741461 | <a href="https://www.genecards.org/cgi-bin/carddisp.pl?gene=piR-55036-040">https://www.genecards.org/cgi-bin/carddisp.pl?gene=piR-55036-040</a>         |
| piR-31534-137     |                                    | RNA Gene       | 2  | GC13M028707 | 1.741461 | <a href="https://www.genecards.org/cgi-bin/carddisp.pl?gene=piR-31534-137">https://www.genecards.org/cgi-bin/carddisp.pl?gene=piR-31534-137</a>         |
| piR-43106-189     |                                    | RNA Gene       | 2  | GC07P135282 | 1.741461 | <a href="https://www.genecards.org/cgi-bin/carddisp.pl?gene=piR-43106-189">https://www.genecards.org/cgi-bin/carddisp.pl?gene=piR-43106-189</a>         |
| LOC107984123      | Uncharacterized LOC107984123       | RNA Gene       | 1  | GC07M135264 | 1.741461 | <a href="https://www.genecards.org/cgi-bin/carddisp.pl?gene=LOC107984123">https://www.genecards.org/cgi-bin/carddisp.pl?gene=LOC107984123</a>           |
| LOC105377705      | Uncharacterized LOC105377705       | RNA Gene       | 1  | GC05M166230 | 1.741461 | <a href="https://www.genecards.org/cgi-bin/carddisp.pl?gene=LOC105377705">https://www.genecards.org/cgi-bin/carddisp.pl?gene=LOC105377705</a>           |
| ENSG00000219736   |                                    | Pseudogene     | 1  | GC06M074850 | 1.741461 | <a href="https://www.genecards.org/cgi-bin/carddisp.pl?gene=ENSG00000219736">https://www.genecards.org/cgi-bin/carddisp.pl?gene=ENSG00000219736</a>     |
| ENSG00000229119   |                                    | Pseudogene     | 1  | GC05P166383 | 1.741461 | <a href="https://www.genecards.org/cgi-bin/carddisp.pl?gene=ENSG00000229119">https://www.genecards.org/cgi-bin/carddisp.pl?gene=ENSG00000229119</a>     |
| ENSG00000220748   |                                    | Pseudogene     | 1  | GC06P023972 | 1.741461 | <a href="https://www.genecards.org/cgi-bin/carddisp.pl?gene=ENSG00000220748">https://www.genecards.org/cgi-bin/carddisp.pl?gene=ENSG00000220748</a>     |
| LOC102724253      | Uncharacterized LOC102724253       | RNA Gene       | 1  | GC15M038755 | 1.741461 | <a href="https://www.genecards.org/cgi-bin/carddisp.pl?gene=LOC102724253">https://www.genecards.org/cgi-bin/carddisp.pl?gene=LOC102724253</a>           |
| RF00026-272       |                                    | RNA Gene       | 1  | GC13M028705 | 1.741461 | <a href="https://www.genecards.org/cgi-bin/carddisp.pl?gene=RF00026-272">https://www.genecards.org/cgi-bin/carddisp.pl?gene=RF00026-272</a>             |
| HSALNG0105127-003 |                                    | RNA Gene       | 1  | GC15P038755 | 1.741461 | <a href="https://www.genecards.org/cgi-bin/carddisp.pl?gene=HSALNG0105127-003">https://www.genecards.org/cgi-bin/carddisp.pl?gene=HSALNG0105127-003</a> |
| CR1L              | Complement C3b/C4b Receptor 1 Like | Protein Coding | 34 | GC01P207646 | 1.733071 | <a href="https://www.genecards.org/cgi-bin/carddisp.pl?gene=CR1L">https://www.genecards.org/cgi-bin/carddisp.pl?gene=CR1L</a>                           |
| ST8SIA6-AS1       | ST8SIA6 Antisense RNA 1            | RNA Gene       | 15 | GC10P017386 | 1.730435 | <a href="https://www.genecards.org/cgi-bin/carddisp.pl?gene=ST8SIA6-AS1">https://www.genecards.org/cgi-bin/carddisp.pl?gene=ST8SIA6-AS1</a>             |

|           |                                                  |                |    |             |          |                                                                                                                                         |
|-----------|--------------------------------------------------|----------------|----|-------------|----------|-----------------------------------------------------------------------------------------------------------------------------------------|
| LANCL2    | LanC Like 2                                      | Protein Coding | 36 | GC07P055365 | 1.726853 | <a href="https://www.genecards.org/cgi-bin/carddisp.pl?gene=LANCL2">https://www.genecards.org/cgi-bin/carddisp.pl?gene=LANCL2</a>       |
| SAP18     | Sin3A Associated Protein 18                      | Protein Coding | 40 | GC13P021140 | 1.722666 | <a href="https://www.genecards.org/cgi-bin/carddisp.pl?gene=SAP18">https://www.genecards.org/cgi-bin/carddisp.pl?gene=SAP18</a>         |
| IGKV2D-23 | Immunoglobulin Kappa Variable 2D-23 (Pseudogene) | Pseudogene     | 5  | GC02P090720 | 1.71927  | <a href="https://www.genecards.org/cgi-bin/carddisp.pl?gene=IGKV2D-23">https://www.genecards.org/cgi-bin/carddisp.pl?gene=IGKV2D-23</a> |
| LINC01116 | Long Intergenic Non-Protein Coding RNA 1116      | RNA Gene       | 16 | GC02M176629 | 1.709733 | <a href="https://www.genecards.org/cgi-bin/carddisp.pl?gene=LINC01116">https://www.genecards.org/cgi-bin/carddisp.pl?gene=LINC01116</a> |
| UNC5B     | Unc-5 Netrin Receptor B                          | Protein Coding | 38 | GC10P071212 | 1.704455 | <a href="https://www.genecards.org/cgi-bin/carddisp.pl?gene=UNC5B">https://www.genecards.org/cgi-bin/carddisp.pl?gene=UNC5B</a>         |
| GRWD1     | Glutamate Rich WD Repeat Containing 1            | Protein Coding | 33 | GC19P048445 | 1.700534 | <a href="https://www.genecards.org/cgi-bin/carddisp.pl?gene=GRWD1">https://www.genecards.org/cgi-bin/carddisp.pl?gene=GRWD1</a>         |
| ERVK-6    | Endogenous Retrovirus Group K Member 6, Envelope | Protein Coding | 16 | GC07U903184 | 1.691116 | <a href="https://www.genecards.org/cgi-bin/carddisp.pl?gene=ERVK-6">https://www.genecards.org/cgi-bin/carddisp.pl?gene=ERVK-6</a>       |
| SRRM3     | Serine/Arginine Repetitive Matrix 3              | Protein Coding | 30 | GC07P076201 | 1.686083 | <a href="https://www.genecards.org/cgi-bin/carddisp.pl?gene=SRRM3">https://www.genecards.org/cgi-bin/carddisp.pl?gene=SRRM3</a>         |
| H2BU1     | H2B.U Histone 1                                  | Protein Coding | 25 | GC01P228467 | 1.678734 | <a href="https://www.genecards.org/cgi-bin/carddisp.pl?gene=H2BU1">https://www.genecards.org/cgi-bin/carddisp.pl?gene=H2BU1</a>         |
| LINC00052 | Long Intergenic Non-Protein Coding RNA 52        | RNA Gene       | 19 | GC15P087576 | 1.677874 | <a href="https://www.genecards.org/cgi-bin/carddisp.pl?gene=LINC00052">https://www.genecards.org/cgi-bin/carddisp.pl?gene=LINC00052</a> |
| MIR613    | MicroRNA 613                                     | RNA Gene       | 13 | GC12P012783 | 1.670024 | <a href="https://www.genecards.org/cgi-bin/carddisp.pl?gene=MIR613">https://www.genecards.org/cgi-bin/carddisp.pl?gene=MIR613</a>       |
| H2AC14    | H2A Clustered Histone 14                         | Protein Coding | 27 | GC06M046627 | 1.669144 | <a href="https://www.genecards.org/cgi-bin/carddisp.pl?gene=H2AC14">https://www.genecards.org/cgi-bin/carddisp.pl?gene=H2AC14</a>       |
| H2BC4     | H2B Clustered Histone 4                          | Protein Coding | 30 | GC06M047212 | 1.666755 | <a href="https://www.genecards.org/cgi-bin/carddisp.pl?gene=H2BC4">https://www.genecards.org/cgi-bin/carddisp.pl?gene=H2BC4</a>         |
| ZNF436    | Zinc Finger Protein 436                          | Protein Coding | 40 | GC01M023359 | 1.659083 | <a href="https://www.genecards.org/cgi-bin/carddisp.pl?gene=ZNF436">https://www.genecards.org/cgi-bin/carddisp.pl?gene=ZNF436</a>       |
| KLF17     | Kruppel Like Factor 17                           | Protein Coding | 38 | GC01P044048 | 1.657151 | <a href="https://www.genecards.org/cgi-bin/carddisp.pl?gene=KLF17">https://www.genecards.org/cgi-bin/carddisp.pl?gene=KLF17</a>         |
| IPP       | Intracisternal A Particle-Promoted Polypeptide   | Protein Coding | 36 | GC01M045695 | 1.656377 | <a href="https://www.genecards.org/cgi-bin/carddisp.pl?gene=IPP">https://www.genecards.org/cgi-bin/carddisp.pl?gene=IPP</a>             |
| HAT1      | Histone Acetyltransferase 1                      | Protein Coding | 44 | GC02P171922 | 1.648816 | <a href="https://www.genecards.org/cgi-bin/carddisp.pl?gene=HAT1">https://www.genecards.org/cgi-bin/carddisp.pl?gene=HAT1</a>           |
| H2BC14    | H2B Clustered Histone 14                         | Protein Coding | 27 | GC06P055046 | 1.645323 | <a href="https://www.genecards.org/cgi-bin/carddisp.pl?gene=H2BC14">https://www.genecards.org/cgi-bin/carddisp.pl?gene=H2BC14</a>       |
| RMST      | Rhabdomyosarcoma 2 Associated Transcript         | RNA Gene       | 21 | GC12P097431 | 1.630729 | <a href="https://www.genecards.org/cgi-bin/carddisp.pl?gene=RMST">https://www.genecards.org/cgi-bin/carddisp.pl?gene=RMST</a>           |

|            |                                             |                |    |             |          |                                                                                                                                           |
|------------|---------------------------------------------|----------------|----|-------------|----------|-------------------------------------------------------------------------------------------------------------------------------------------|
| GPR12      | G Protein-Coupled Receptor 12               | Protein Coding | 38 | GC13M026755 | 1.630275 | <a href="https://www.genecards.org/cgi-bin/carddisp.pl?gene=GPR12">https://www.genecards.org/cgi-bin/carddisp.pl?gene=GPR12</a>           |
| SUCNR1     | Succinate Receptor 1                        | Protein Coding | 41 | GC03P151873 | 1.623741 | <a href="https://www.genecards.org/cgi-bin/carddisp.pl?gene=SUCNR1">https://www.genecards.org/cgi-bin/carddisp.pl?gene=SUCNR1</a>         |
| LINC01089  | Long Intergenic Non-Protein Coding RNA 1089 | RNA Gene       | 15 | GC12M121796 | 1.623714 | <a href="https://www.genecards.org/cgi-bin/carddisp.pl?gene=LINC01089">https://www.genecards.org/cgi-bin/carddisp.pl?gene=LINC01089</a>   |
| HRK        | Harakiri, BCL2 Interacting Protein          | Protein Coding | 39 | GC12M116820 | 1.623511 | <a href="https://www.genecards.org/cgi-bin/carddisp.pl?gene=HRK">https://www.genecards.org/cgi-bin/carddisp.pl?gene=HRK</a>               |
| PBOV1      | Prostate And Breast Cancer Overexpressed 1  | Protein Coding | 27 | GC06M138215 | 1.621172 | <a href="https://www.genecards.org/cgi-bin/carddisp.pl?gene=PBOV1">https://www.genecards.org/cgi-bin/carddisp.pl?gene=PBOV1</a>           |
| KLF3-AS1   | KLF3 Antisense RNA 1                        | RNA Gene       | 16 | GC04M038594 | 1.620704 | <a href="https://www.genecards.org/cgi-bin/carddisp.pl?gene=KLF3-AS1">https://www.genecards.org/cgi-bin/carddisp.pl?gene=KLF3-AS1</a>     |
| H2BC17     | H2B Clustered Histone 17                    | Protein Coding | 26 | GC06P055057 | 1.613958 | <a href="https://www.genecards.org/cgi-bin/carddisp.pl?gene=H2BC17">https://www.genecards.org/cgi-bin/carddisp.pl?gene=H2BC17</a>         |
| LINC00574  | Long Intergenic Non-Protein Coding RNA 574  | RNA Gene       | 19 | GC06P169790 | 1.613252 | <a href="https://www.genecards.org/cgi-bin/carddisp.pl?gene=LINC00574">https://www.genecards.org/cgi-bin/carddisp.pl?gene=LINC00574</a>   |
| PDCD4-AS1  | PDCD4 Antisense RNA 1                       | RNA Gene       | 16 | GC10M110868 | 1.608485 | <a href="https://www.genecards.org/cgi-bin/carddisp.pl?gene=PDCD4-AS1">https://www.genecards.org/cgi-bin/carddisp.pl?gene=PDCD4-AS1</a>   |
| TRERF1     | Transcriptional Regulating Factor 1         | Protein Coding | 38 | GC06M042224 | 1.598639 | <a href="https://www.genecards.org/cgi-bin/carddisp.pl?gene=TRERF1">https://www.genecards.org/cgi-bin/carddisp.pl?gene=TRERF1</a>         |
| NMRAL2P    | NmrA Like Redox Sensor 2, Pseudogene ZNF667 | Pseudogene     | 9  | GC03P185961 | 1.582165 | <a href="https://www.genecards.org/cgi-bin/carddisp.pl?gene=NMRAL2P">https://www.genecards.org/cgi-bin/carddisp.pl?gene=NMRAL2P</a>       |
| ZNF667-AS1 | Antisense RNA 1 (Head To Head)              | RNA Gene       | 15 | GC19P056477 | 1.573915 | <a href="https://www.genecards.org/cgi-bin/carddisp.pl?gene=ZNF667-AS1">https://www.genecards.org/cgi-bin/carddisp.pl?gene=ZNF667-AS1</a> |
| KIAA0100   | KIAA0100                                    | Protein Coding | 34 | GC17M028614 | 1.54563  | <a href="https://www.genecards.org/cgi-bin/carddisp.pl?gene=KIAA0100">https://www.genecards.org/cgi-bin/carddisp.pl?gene=KIAA0100</a>     |
| MIR103B2   | MicroRNA 103b-2                             | RNA Gene       | 9  | GC20M003899 | 1.544202 | <a href="https://www.genecards.org/cgi-bin/carddisp.pl?gene=MIR103B2">https://www.genecards.org/cgi-bin/carddisp.pl?gene=MIR103B2</a>     |
| MIR103B1   | MicroRNA 103b-1                             | RNA Gene       | 8  | GC05P168560 | 1.544202 | <a href="https://www.genecards.org/cgi-bin/carddisp.pl?gene=MIR103B1">https://www.genecards.org/cgi-bin/carddisp.pl?gene=MIR103B1</a>     |
| HEATR6     | HEAT Repeat Containing 6                    | Protein Coding | 33 | GC17M060041 | 1.539996 | <a href="https://www.genecards.org/cgi-bin/carddisp.pl?gene=HEATR6">https://www.genecards.org/cgi-bin/carddisp.pl?gene=HEATR6</a>         |
| RGS16      | Regulator Of G Protein Signaling 16         | Protein Coding | 40 | GC01M182598 | 1.53539  | <a href="https://www.genecards.org/cgi-bin/carddisp.pl?gene=RGS16">https://www.genecards.org/cgi-bin/carddisp.pl?gene=RGS16</a>           |
| SLC16A3    | Solute Carrier Family 16 Member 3           | Protein Coding | 45 | GC17P082217 | 1.534593 | <a href="https://www.genecards.org/cgi-bin/carddisp.pl?gene=SLC16A3">https://www.genecards.org/cgi-bin/carddisp.pl?gene=SLC16A3</a>       |
| MED18      | Mediator Complex Subunit 18                 | Protein Coding | 36 | GC01P028340 | 1.531515 | <a href="https://www.genecards.org/cgi-bin/carddisp.pl?gene=MED18">https://www.genecards.org/cgi-bin/carddisp.pl?gene=MED18</a>           |
| H2AC11     | H2A Clustered Histone 11                    | Protein Coding | 31 | GC06P055577 | 1.530112 | <a href="https://www.genecards.org/cgi-bin/carddisp.pl?gene=H2AC11">https://www.genecards.org/cgi-bin/carddisp.pl?gene=H2AC11</a>         |

|            |                                                |                |    |             |          |                                                                                                                                           |
|------------|------------------------------------------------|----------------|----|-------------|----------|-------------------------------------------------------------------------------------------------------------------------------------------|
| MRS2       | Magnesium Transporter MRS2                     | Protein Coding | 38 | GC06P024402 | 1.518554 | <a href="https://www.genecards.org/cgi-bin/carddisp.pl?gene=MRS2">https://www.genecards.org/cgi-bin/carddisp.pl?gene=MRS2</a>             |
| KCNK15-AS1 | KCNK15 And WISP2 Antisense RNA 1               | RNA Gene       | 13 | GC20M044694 | 1.514382 | <a href="https://www.genecards.org/cgi-bin/carddisp.pl?gene=KCNK15-AS1">https://www.genecards.org/cgi-bin/carddisp.pl?gene=KCNK15-AS1</a> |
| PRSS50     | Serine Protease 50                             | Protein Coding | 34 | GC03M046712 | 1.512659 | <a href="https://www.genecards.org/cgi-bin/carddisp.pl?gene=PRSS50">https://www.genecards.org/cgi-bin/carddisp.pl?gene=PRSS50</a>         |
| KLK9       | Kallikrein Related Peptidase 9                 | Protein Coding | 33 | GC19M051002 | 1.495976 | <a href="https://www.genecards.org/cgi-bin/carddisp.pl?gene=KLK9">https://www.genecards.org/cgi-bin/carddisp.pl?gene=KLK9</a>             |
| RHBDD2     | Rhomboid Domain Containing 2                   | Protein Coding | 36 | GC07P075842 | 1.483984 | <a href="https://www.genecards.org/cgi-bin/carddisp.pl?gene=RHBDD2">https://www.genecards.org/cgi-bin/carddisp.pl?gene=RHBDD2</a>         |
| ETAA1      | ETAA1 Activator Of ATR Kinase                  | Protein Coding | 32 | GC02P067397 | 1.482463 | <a href="https://www.genecards.org/cgi-bin/carddisp.pl?gene=ETAA1">https://www.genecards.org/cgi-bin/carddisp.pl?gene=ETAA1</a>           |
| MIR2052HG  | MIR2052 Host Gene                              | RNA Gene       | 12 | GC08P074599 | 1.479439 | <a href="https://www.genecards.org/cgi-bin/carddisp.pl?gene=MIR2052HG">https://www.genecards.org/cgi-bin/carddisp.pl?gene=MIR2052HG</a>   |
| PDR        | Pigment Disorder, Reticulate                   | Genetic Locus  | 4  | GC0XU990180 | 1.474738 | <a href="https://www.genecards.org/cgi-bin/carddisp.pl?gene=PDR">https://www.genecards.org/cgi-bin/carddisp.pl?gene=PDR</a>               |
| ADARB2-AS1 | ADARB2 Antisense RNA 1                         | RNA Gene       | 19 | GC10P001526 | 1.473819 | <a href="https://www.genecards.org/cgi-bin/carddisp.pl?gene=ADARB2-AS1">https://www.genecards.org/cgi-bin/carddisp.pl?gene=ADARB2-AS1</a> |
| SLC24A2    | Solute Carrier Family 24 Member 2              | Protein Coding | 40 | GC09M019507 | 1.46725  | <a href="https://www.genecards.org/cgi-bin/carddisp.pl?gene=SLC24A2">https://www.genecards.org/cgi-bin/carddisp.pl?gene=SLC24A2</a>       |
| MIR570     | MicroRNA 570                                   | RNA Gene       | 16 | GC03P195777 | 1.464161 | <a href="https://www.genecards.org/cgi-bin/carddisp.pl?gene=MIR570">https://www.genecards.org/cgi-bin/carddisp.pl?gene=MIR570</a>         |
| ERVH48-1   | Endogenous Retrovirus Group 48 Member 1        | Protein Coding | 15 | GC21M042916 | 1.456905 | <a href="https://www.genecards.org/cgi-bin/carddisp.pl?gene=ERVH48-1">https://www.genecards.org/cgi-bin/carddisp.pl?gene=ERVH48-1</a>     |
| TRIM66     | Tripartite Motif Containing 66                 | Protein Coding | 33 | GC11M008612 | 1.448823 | <a href="https://www.genecards.org/cgi-bin/carddisp.pl?gene=TRIM66">https://www.genecards.org/cgi-bin/carddisp.pl?gene=TRIM66</a>         |
| LINP1      | LncRNA In Non-Homologous End Joining Pathway 1 | RNA Gene       | 11 | GC10P006738 | 1.441921 | <a href="https://www.genecards.org/cgi-bin/carddisp.pl?gene=LINP1">https://www.genecards.org/cgi-bin/carddisp.pl?gene=LINP1</a>           |
| LINC00958  | Long Intergenic Non-Protein Coding RNA 958     | RNA Gene       | 16 | GC11M012930 | 1.4415   | <a href="https://www.genecards.org/cgi-bin/carddisp.pl?gene=LINC00958">https://www.genecards.org/cgi-bin/carddisp.pl?gene=LINC00958</a>   |
| DOC2B      | Double C2 Domain Beta                          | Protein Coding | 36 | GC17M000142 | 1.43914  | <a href="https://www.genecards.org/cgi-bin/carddisp.pl?gene=DOC2B">https://www.genecards.org/cgi-bin/carddisp.pl?gene=DOC2B</a>           |
| MTBP       | MDM2 Binding Protein                           | Protein Coding | 33 | GC08P120426 | 1.429176 | <a href="https://www.genecards.org/cgi-bin/carddisp.pl?gene=MTBP">https://www.genecards.org/cgi-bin/carddisp.pl?gene=MTBP</a>             |
| FOXCUT     | FOXC1 Upstream Transcript                      | RNA Gene       | 12 | GC06P001604 | 1.426376 | <a href="https://www.genecards.org/cgi-bin/carddisp.pl?gene=FOXCUT">https://www.genecards.org/cgi-bin/carddisp.pl?gene=FOXCUT</a>         |



|           |                                                                 |                |    |             |          |                                                                                                                                         |
|-----------|-----------------------------------------------------------------|----------------|----|-------------|----------|-----------------------------------------------------------------------------------------------------------------------------------------|
| HERC4     | HECT And RLD Domain<br>Containing E3 Ubiquitin Protein Ligase 4 | Protein Coding | 37 | GC10M067921 | 1.419177 | <a href="https://www.genecards.org/cgi-bin/carddisp.pl?gene=HERC4">https://www.genecards.org/cgi-bin/carddisp.pl?gene=HERC4</a>         |
| H2BC6     | H2B Clustered Histone 6                                         | Protein Coding | 27 | GC06P055584 | 1.408377 | <a href="https://www.genecards.org/cgi-bin/carddisp.pl?gene=H2BC6">https://www.genecards.org/cgi-bin/carddisp.pl?gene=H2BC6</a>         |
| H2BC15    | H2B Clustered Histone 15                                        | Protein Coding | 28 | GC06P055050 | 1.407558 | <a href="https://www.genecards.org/cgi-bin/carddisp.pl?gene=H2BC15">https://www.genecards.org/cgi-bin/carddisp.pl?gene=H2BC15</a>       |
| ERN2      | Endoplasmic Reticulum To Nucleus Signaling 2<br>BPI Fold        | Protein Coding | 38 | GC16M023690 | 1.393055 | <a href="https://www.genecards.org/cgi-bin/carddisp.pl?gene=ERN2">https://www.genecards.org/cgi-bin/carddisp.pl?gene=ERN2</a>           |
| BPIFA4P   | Containing Family A Member 4, Pseudogene                        | Pseudogene     | 18 | GC20P033193 | 1.382041 | <a href="https://www.genecards.org/cgi-bin/carddisp.pl?gene=BPIFA4P">https://www.genecards.org/cgi-bin/carddisp.pl?gene=BPIFA4P</a>     |
| LINC01671 | Long Intergenic Non-Protein Coding RNA 1671                     | RNA Gene       | 10 | GC21M042579 | 1.37744  | <a href="https://www.genecards.org/cgi-bin/carddisp.pl?gene=LINC01671">https://www.genecards.org/cgi-bin/carddisp.pl?gene=LINC01671</a> |
| MANCR     | Mitotically Associated Long Non Coding RNA RAB13,               | RNA Gene       | 12 | GC10M004577 | 1.366042 | <a href="https://www.genecards.org/cgi-bin/carddisp.pl?gene=MANCR">https://www.genecards.org/cgi-bin/carddisp.pl?gene=MANCR</a>         |
| RAB13     | Member RAS Oncogene Family                                      | Protein Coding | 38 | GC01M153981 | 1.351943 | <a href="https://www.genecards.org/cgi-bin/carddisp.pl?gene=RAB13">https://www.genecards.org/cgi-bin/carddisp.pl?gene=RAB13</a>         |
| DEDD2     | Death Effector Domain Containing 2                              | Protein Coding | 36 | GC19M042198 | 1.338967 | <a href="https://www.genecards.org/cgi-bin/carddisp.pl?gene=DEDD2">https://www.genecards.org/cgi-bin/carddisp.pl?gene=DEDD2</a>         |
| DSCAM-AS1 | DSCAM Antisense RNA 1                                           | RNA Gene       | 16 | GC21P040383 | 1.332989 | <a href="https://www.genecards.org/cgi-bin/carddisp.pl?gene=DSCAM-AS1">https://www.genecards.org/cgi-bin/carddisp.pl?gene=DSCAM-AS1</a> |
| OR3A4P    | Olfactory Receptor Family 3 Subfamily A Member 4 Pseudogene     | Pseudogene     | 19 | GC17P003365 | 1.322313 | <a href="https://www.genecards.org/cgi-bin/carddisp.pl?gene=OR3A4P">https://www.genecards.org/cgi-bin/carddisp.pl?gene=OR3A4P</a>       |
| LINC00628 | Long Intergenic Non-Protein Coding RNA 628                      | RNA Gene       | 13 | GC01M204375 | 1.322313 | <a href="https://www.genecards.org/cgi-bin/carddisp.pl?gene=LINC00628">https://www.genecards.org/cgi-bin/carddisp.pl?gene=LINC00628</a> |
| DHRS4L1   | Dehydrogenase /Reductase 4 Like 1 (Pseudogene)                  | RNA Gene       | 27 | GC14P026317 | 1.311215 | <a href="https://www.genecards.org/cgi-bin/carddisp.pl?gene=DHRS4L1">https://www.genecards.org/cgi-bin/carddisp.pl?gene=DHRS4L1</a>     |
| CASC22    | Cancer Susceptibility 22                                        | RNA Gene       | 13 | GC16P052258 | 1.299549 | <a href="https://www.genecards.org/cgi-bin/carddisp.pl?gene=CASC22">https://www.genecards.org/cgi-bin/carddisp.pl?gene=CASC22</a>       |

|                 |                                             |                |    |             |          |                                                                                                                                                     |
|-----------------|---------------------------------------------|----------------|----|-------------|----------|-----------------------------------------------------------------------------------------------------------------------------------------------------|
| SGPP2           | Sphingosine-1-Phosphate Phosphatase 2       | Protein Coding | 36 | GC02P222424 | 1.298772 | <a href="https://www.genecards.org/cgi-bin/carddisp.pl?gene=SGPP2">https://www.genecards.org/cgi-bin/carddisp.pl?gene=SGPP2</a>                     |
| SF3B5           | Splicing Factor 3b Subunit 5                | Protein Coding | 35 | GC06M144094 | 1.297816 | <a href="https://www.genecards.org/cgi-bin/carddisp.pl?gene=SF3B5">https://www.genecards.org/cgi-bin/carddisp.pl?gene=SF3B5</a>                     |
| FGF14-AS2       | FGF14 Antisense RNA 2                       | RNA Gene       | 13 | GC13P102394 | 1.287911 | <a href="https://www.genecards.org/cgi-bin/carddisp.pl?gene=FGF14-AS2">https://www.genecards.org/cgi-bin/carddisp.pl?gene=FGF14-AS2</a>             |
| IGKV@           | Immunoglobulin Kappa Variable Cluster       | Gene Cluster   | 8  | GC02U990059 | 1.284459 | <a href="https://www.genecards.org/cgi-bin/carddisp.pl?gene=IGKV%40">https://www.genecards.org/cgi-bin/carddisp.pl?gene=IGKV%40</a>                 |
| ELK4            | ETS Transcription Factor ELK4               | Protein Coding | 37 | GC01M205577 | 1.273318 | <a href="https://www.genecards.org/cgi-bin/carddisp.pl?gene=ELK4">https://www.genecards.org/cgi-bin/carddisp.pl?gene=ELK4</a>                       |
| H2BC12          | H2B Clustered Histone 12                    | Protein Coding | 27 | GC06M046553 | 1.256909 | <a href="https://www.genecards.org/cgi-bin/carddisp.pl?gene=H2BC12">https://www.genecards.org/cgi-bin/carddisp.pl?gene=H2BC12</a>                   |
| RASSF1-AS1      | RASSF1 Antisense RNA 1                      | RNA Gene       | 12 | GC03P050337 | 1.247685 | <a href="https://www.genecards.org/cgi-bin/carddisp.pl?gene=RASSF1-AS1">https://www.genecards.org/cgi-bin/carddisp.pl?gene=RASSF1-AS1</a>           |
| STXBP5-AS1      | STXBP5 Antisense RNA 1                      | RNA Gene       | 16 | GC06M146841 | 1.236905 | <a href="https://www.genecards.org/cgi-bin/carddisp.pl?gene=STXBP5-AS1">https://www.genecards.org/cgi-bin/carddisp.pl?gene=STXBP5-AS1</a>           |
| GAL3ST2         | Galactose-3-O-Sulfotransferase 2            | Protein Coding | 34 | GC02P241777 | 1.228368 | <a href="https://www.genecards.org/cgi-bin/carddisp.pl?gene=GAL3ST2">https://www.genecards.org/cgi-bin/carddisp.pl?gene=GAL3ST2</a>                 |
| LINC00160       | Long Intergenic Non-Protein Coding RNA 160  | RNA Gene       | 15 | GC21M034723 | 1.21189  | <a href="https://www.genecards.org/cgi-bin/carddisp.pl?gene=LINC00160">https://www.genecards.org/cgi-bin/carddisp.pl?gene=LINC00160</a>             |
| ENSG00000279217 |                                             | RNA Gene       | 4  | GC22P036071 | 1.179829 | <a href="https://www.genecards.org/cgi-bin/carddisp.pl?gene=ENSG00000279217">https://www.genecards.org/cgi-bin/carddisp.pl?gene=ENSG00000279217</a> |
| LINC02099       | Long Intergenic Non-Protein Coding RNA 2099 | RNA Gene       | 11 | GC08P029749 | 1.174197 | <a href="https://www.genecards.org/cgi-bin/carddisp.pl?gene=LINC02099">https://www.genecards.org/cgi-bin/carddisp.pl?gene=LINC02099</a>             |
| PTPRG-AS1       | PTPRG Antisense RNA 1                       | RNA Gene       | 15 | GC03M062248 | 1.164506 | <a href="https://www.genecards.org/cgi-bin/carddisp.pl?gene=PTPRG-AS1">https://www.genecards.org/cgi-bin/carddisp.pl?gene=PTPRG-AS1</a>             |
| H2BC8           | H2B Clustered Histone 8                     | Protein Coding | 27 | GC06M047213 | 1.156155 | <a href="https://www.genecards.org/cgi-bin/carddisp.pl?gene=H2BC8">https://www.genecards.org/cgi-bin/carddisp.pl?gene=H2BC8</a>                     |
| FMNL3           | Formin Like 3                               | Protein Coding | 36 | GC12M049636 | 1.154362 | <a href="https://www.genecards.org/cgi-bin/carddisp.pl?gene=FMNL3">https://www.genecards.org/cgi-bin/carddisp.pl?gene=FMNL3</a>                     |
| H2AC15          | H2A Clustered Histone 15                    | Protein Coding | 29 | GC06M046630 | 1.150205 | <a href="https://www.genecards.org/cgi-bin/carddisp.pl?gene=H2AC15">https://www.genecards.org/cgi-bin/carddisp.pl?gene=H2AC15</a>                   |
| H2BC7           | H2B Clustered Histone 7                     | Protein Coding | 26 | GC06P055585 | 1.13868  | <a href="https://www.genecards.org/cgi-bin/carddisp.pl?gene=H2BC7">https://www.genecards.org/cgi-bin/carddisp.pl?gene=H2BC7</a>                     |
| ENSG00000229282 |                                             | RNA Gene       | 8  | GC06P003038 | 1.138029 | <a href="https://www.genecards.org/cgi-bin/carddisp.pl?gene=ENSG00000229282">https://www.genecards.org/cgi-bin/carddisp.pl?gene=ENSG00000229282</a> |
| H2AC19          | H2A Clustered Histone 19                    | Protein Coding | 22 | GC01P149980 | 1.132637 | <a href="https://www.genecards.org/cgi-bin/carddisp.pl?gene=H2AC19">https://www.genecards.org/cgi-bin/carddisp.pl?gene=H2AC19</a>                   |
| H2BC10          | H2B Clustered Histone 10                    | Protein Coding | 27 | GC06P055582 | 1.102045 | <a href="https://www.genecards.org/cgi-bin/carddisp.pl?gene=H2BC10">https://www.genecards.org/cgi-bin/carddisp.pl?gene=H2BC10</a>                   |

|                     |                                                                      |                   |    |                 |          |                                                                                                                                                     |
|---------------------|----------------------------------------------------------------------|-------------------|----|-----------------|----------|-----------------------------------------------------------------------------------------------------------------------------------------------------|
| LINC00636           | Long Intergenic<br>Non-Protein<br>Coding RNA<br>636                  | RNA<br>Gene       | 17 | GC03P1078<br>83 | 1.101862 | <a href="https://www.genecards.org/cgi-bin/carddisp.pl?gene=LINC00636">https://www.genecards.org/cgi-bin/carddisp.pl?gene=LINC00636</a>             |
| HMMR-<br>AS1        | HMMR<br>Antisense RNA<br>1                                           | RNA<br>Gene       | 14 | GC05M163<br>482 | 1.101862 | <a href="https://www.genecards.org/cgi-bin/carddisp.pl?gene=HMMR-AS1">https://www.genecards.org/cgi-bin/carddisp.pl?gene=HMMR-AS1</a>               |
| JADRR               | JADE1 Adjacent<br>Regulatory<br>RNA                                  | RNA<br>Gene       | 11 | GC04P1287<br>68 | 1.101862 | <a href="https://www.genecards.org/cgi-bin/carddisp.pl?gene=JADRR">https://www.genecards.org/cgi-bin/carddisp.pl?gene=JADRR</a>                     |
| LINC02130           | Long Intergenic<br>Non-Protein<br>Coding RNA<br>2130                 | RNA<br>Gene       | 9  | GC16M014<br>365 | 1.101862 | <a href="https://www.genecards.org/cgi-bin/carddisp.pl?gene=LINC02130">https://www.genecards.org/cgi-bin/carddisp.pl?gene=LINC02130</a>             |
| ENSG0000<br>0235584 |                                                                      | RNA<br>Gene       | 6  | GC02P0956<br>73 | 1.101862 | <a href="https://www.genecards.org/cgi-bin/carddisp.pl?gene=ENSG00000235584">https://www.genecards.org/cgi-bin/carddisp.pl?gene=ENSG00000235584</a> |
| FAM174A             | Family With<br>Sequence<br>Similarity 174<br>Member A<br>RANBP2 Like | Protein<br>Coding | 32 | GC05P1005<br>35 | 1.070906 | <a href="https://www.genecards.org/cgi-bin/carddisp.pl?gene=FAM174A">https://www.genecards.org/cgi-bin/carddisp.pl?gene=FAM174A</a>                 |
| RGPD4               | And GRIP<br>Domain<br>Containing 4                                   | Protein<br>Coding | 28 | GC02P1078<br>26 | 1.061936 | <a href="https://www.genecards.org/cgi-bin/carddisp.pl?gene=RGPD4">https://www.genecards.org/cgi-bin/carddisp.pl?gene=RGPD4</a>                     |
| RNY5                | RNA, Ro60-<br>Associated Y5                                          | RNA<br>Gene       | 12 | GC07P1489<br>41 | 0.764868 | <a href="https://www.genecards.org/cgi-bin/carddisp.pl?gene=RNY5">https://www.genecards.org/cgi-bin/carddisp.pl?gene=RNY5</a>                       |
| MIR3666             | MicroRNA<br>3666                                                     | RNA<br>Gene       | 11 | GC07P1146<br>53 | 0.753341 | <a href="https://www.genecards.org/cgi-bin/carddisp.pl?gene=MIR3666">https://www.genecards.org/cgi-bin/carddisp.pl?gene=MIR3666</a>                 |
| MIR4668             | MicroRNA<br>4668                                                     | RNA<br>Gene       | 12 | GC09P1119<br>32 | 0.71616  | <a href="https://www.genecards.org/cgi-bin/carddisp.pl?gene=MIR4668">https://www.genecards.org/cgi-bin/carddisp.pl?gene=MIR4668</a>                 |
| OR2A4               | Olfactory<br>Receptor<br>Family 2<br>Subfamily A<br>Member 4         | Protein<br>Coding | 33 | GC06M131<br>700 | 0.657361 | <a href="https://www.genecards.org/cgi-bin/carddisp.pl?gene=OR2A4">https://www.genecards.org/cgi-bin/carddisp.pl?gene=OR2A4</a>                     |
| TM6SF1              | Transmembran<br>e 6 Superfamily<br>Member 1                          | Protein<br>Coding | 33 | GC15P0833<br>57 | 0.475591 | <a href="https://www.genecards.org/cgi-bin/carddisp.pl?gene=TM6SF1">https://www.genecards.org/cgi-bin/carddisp.pl?gene=TM6SF1</a>                   |
