# Supplementary material for: The Study of Yin-Chen-Hao-Tang Preventing and Treating Alcoholic Fatty Liver Disease through PPAR Signaling Pathway Based on Network Pharmacology and RNA-Seq Transcriptomics
Source: Hindawi journal article supplement (doi:10.1155/2021/8917993), 2021-12-31
Supplement: f1 [file 8917993.f1.zip]

| Mol ID    | Molecule Name   | Target Name                                         | drugbank | Status    |
|-----------|-----------------|-----------------------------------------------------|----------|-----------|
| MOL001237 | o-Acetyltoluene |                                                     |          |           |
| MOL001237 | o-Acetyltoluene | Lysozyme                                            | 2300     |           |
|           |                 | Nicotinate-nucleotide--<br>dimethylbenzimidazole    |          |           |
| MOL001237 | o-Acetyltoluene | phosphoribosyltransferase                           | 2264     |           |
| MOL001237 | o-Acetyltoluene | Glucocorticoid receptor                             | 871      |           |
|           |                 | Amine oxidase [flavin-<br>containing] B             |          |           |
| MOL001301 | cis-Zimtsaeure  | Amine oxidase [flavin-<br>containing] A             | 3939     |           |
| MOL001301 | cis-Zimtsaeure  | Lysozyme                                            | 3941     |           |
| MOL001301 | cis-Zimtsaeure  | Chymotrypsinogen B                                  | 2300     |           |
| MOL001301 | cis-Zimtsaeure  |                                                     | 6011     |           |
| MOL001456 | citric acid     | Coagulation factor X                                | 239      |           |
|           |                 |                                                     |          |           |
| MOL001456 | citric acid     | Prostaglandin G/H synthase 2                        | 290      |           |
| MOL001456 | citric acid     | Aldose reductase                                    | 822      |           |
|           |                 | Proto-oncogene tyrosine-<br>protein kinase Src      |          |           |
| MOL001456 | citric acid     | Cathepsin D                                         | 933      |           |
| MOL001456 | citric acid     |                                                     | 1243     |           |
| MOL001456 | citric acid     | Ig gamma-1 chain C region                           | 4785     |           |
|           |                 |                                                     |          |           |
| MOL001456 | citric acid     | Nitric-oxide synthase, brain                        | 76       |           |
|           |                 | Glutamate [NMDA] receptor<br>subunit epsilon-1      |          |           |
| MOL001456 | citric acid     | Gamma-aminobutyric-acid<br>receptor subunit alpha-1 | 837      |           |
| MOL001456 | citric acid     |                                                     | 872      |           |
| MOL001456 | citric acid     | Ferrichrome-iron receptor                           | 2427     |           |
| MOL001456 | citric acid     | Glutamate receptor 2                                | 921      |           |
|           |                 |                                                     |          |           |
|           |                 | Tyrosine-protein phosphatase<br>non-receptor type 1 |          |           |
| MOL001456 | citric acid     |                                                     | 687      |           |
| MOL001456 | citric acid     | Bacillolysin                                        | 2457     |           |
| MOL001456 | citric acid     | Carboxypeptidase B                                  | 5579     |           |
| MOL001456 | citric acid     | Triosephosphate isomerase                           | 6346     |           |
|           |                 | Glutamate receptor,<br>ionotropic kainate 2         |          |           |
| MOL001456 | citric acid     |                                                     | 918      |           |
| MOL001456 | citric acid     | Histidine decarboxylase                             | 3        | validated |
|           |                 |                                                     |          |           |
| MOL001729 | Crysophanol     | Prostaglandin G/H synthase 1                        | 20       |           |
|           |                 |                                                     |          |           |
| MOL001729 | Crysophanol     | Prostaglandin G/H synthase 2                        | 290      |           |
|           |                 | Heat shock protein HSP 90-<br>alpha                 |          |           |
| MOL001729 | Crysophanol     | Nuclear receptor coactivator<br>2                   | 1939     |           |
| MOL001729 | Crysophanol     |                                                     | 6241     |           |
| MOL001729 | Crysophanol     | Calmodulin                                          | 465      |           |
|           |                 | Sodium channel protein type 5<br>subunit alpha      |          |           |
| MOL001729 | Crysophanol     |                                                     | 220      |           |
|           |                 | cGMP-inhibited 3',5'-cyclic<br>phosphodiesterase A  |          |           |
| MOL001729 | Crysophanol     |                                                     | 485      |           |
|           |                 | Gamma-aminobutyric-acid<br>receptor subunit alpha-1 |          |           |
| MOL001729 | Crysophanol     |                                                     | 872      |           |

|           |             |                                                                                |      |
|-----------|-------------|--------------------------------------------------------------------------------|------|
|           |             | Phosphatidylinositol-4, 5-<br>bisphosphate 3-kinase<br>catalytic subunit gamma |      |
| MOL001729 | Crysophanol | isoform                                                                        | 2404 |
|           |             | cAMP-dependent protein kinase<br>catalytic subunit alpha                       |      |
| MOL001729 | Crysophanol |                                                                                | 6263 |
| MOL001729 | Crysophanol | Ig gamma-1 chain C region                                                      | 4785 |
|           |             | cAMP-dependent protein kinase<br>inhibitor alpha                               |      |
| MOL001729 | Crysophanol |                                                                                | 6264 |
|           |             | 4-aminobutyrate<br>aminotransferase,<br>mitochondrial                          |      |
| MOL001794 | MAE         |                                                                                | 280  |
|           |             | Aspartate aminotransferase,<br>cytoplasmic                                     |      |
| MOL001794 | MAE         |                                                                                | 586  |
|           |             | Proto-oncogene tyrosine-<br>protein kinase Src                                 |      |
| MOL001794 | MAE         |                                                                                | 933  |
| MOL001794 | MAE         |                                                                                |      |
| MOL001794 | MAE         |                                                                                |      |
| MOL001794 | MAE         | Aspartate aminotransferase                                                     | 2249 |
| MOL001794 | MAE         | Ferrichrome-iron receptor                                                      | 2427 |
|           |             | Aromatic-amino-acid<br>aminotransferase                                        |      |
| MOL001794 | MAE         |                                                                                | 2537 |
|           |             | 1-aminocyclopropane-1-<br>carboxylate deaminase                                |      |
| MOL001794 | MAE         |                                                                                | 2518 |
|           |             | Growth-inhibiting protein 18<br>Aspartate aminotransferase,<br>mitochondrial   |      |
| MOL001794 | MAE         |                                                                                | 426  |
| MOL001794 | MAE         | Triosephosphate isomerase                                                      | 6346 |
| MOL001794 | MAE         | Cholinesterase                                                                 | 3923 |
| MOL001794 | MAE         | Cytochrome P450-cam                                                            | 2298 |
| MOL001794 | MAE         | Bacillolysin                                                                   | 2457 |
|           |             | Nicotinate-nucleotide--<br>dimethylbenzimidazole<br>phosphoribosyltransferase  |      |
| MOL001794 | MAE         |                                                                                | 2264 |
|           |             | NAD-dependent malic enzyme,<br>mitochondrial                                   |      |
| MOL001794 | MAE         |                                                                                | 166  |
| MOL001880 | OXL         | Prostaglandin G/H synthase 1                                                   | 20   |
| MOL001880 | OXL         | Nitric-oxide synthase, brain                                                   | 76   |
|           |             | Procollagen-lysine, 2-<br>oxoglutarate 5-dioxygenase 1                         |      |
| MOL001880 | OXL         |                                                                                | 97   |
|           |             | Aldehyde dehydrogenase,<br>mitochondrial                                       |      |
| MOL001880 | OXL         |                                                                                | 147  |
|           |             | Succinate semialdehyde<br>dehydrogenase, mitochondrial                         |      |
| MOL001880 | OXL         |                                                                                | 170  |
|           |             | 4-aminobutyrate<br>aminotransferase,<br>mitochondrial                          |      |
| MOL001880 | OXL         |                                                                                | 280  |

|           |     |                               |      |
|-----------|-----|-------------------------------|------|
| MOL001880 | OXL | Prostaglandin G/H synthase 2  | 290  |
|           |     | Serine                        |      |
|           |     | hydroxymethyltransferase,     |      |
| MOL001880 | OXL | mitochondrial                 | 321  |
| MOL001880 | OXL | DNA polymerase                | 338  |
|           |     | Glutamate [NMDA] receptor     |      |
| MOL001880 | OXL | subunit zeta-1                | 401  |
| MOL001880 | OXL | Kynureninase                  | 435  |
|           |     | Ornithine aminotransferase,   |      |
| MOL001880 | OXL | mitochondrial                 | 472  |
|           |     | Glycine receptor subunit      |      |
| MOL001880 | OXL | alpha-1                       | 482  |
|           |     | Aspartate aminotransferase,   |      |
| MOL001880 | OXL | cytoplasmic                   | 586  |
|           |     | Glutamate [NMDA] receptor     |      |
| MOL001880 | OXL | subunit epsilon-1             | 837  |
|           |     | Gamma-aminobutyric-acid       |      |
| MOL001880 | OXL | receptor subunit alpha-1      | 872  |
|           |     | Proto-oncogene tyrosine-      |      |
| MOL001880 | OXL | protein kinase Src            | 933  |
| MOL001880 | OXL | Cathepsin D                   | 1243 |
| MOL001880 | OXL | Lactotransferrin              | 1439 |
| MOL001880 | OXL | Macrophage metalloelastase    | 2203 |
| MOL001880 | OXL | Leukotriene A-4 hydrolase     | 3060 |
| MOL001880 | OXL | M-phase inducer phosphatase 2 | 3105 |
|           |     | Thioredoxin reductase 1,      |      |
| MOL001880 | OXL | cytoplasmic                   | 3610 |
| MOL001880 | OXL | Cholinesterase                | 3923 |
|           |     | Xanthine                      |      |
| MOL001880 | OXL | dehydrogenase/oxidase         | 3947 |
| MOL001880 | OXL |                               |      |
| MOL001880 | OXL | Monocarboxylate transporter 2 | 489  |
| MOL001880 | OXL | Cytochrome P450-cam           | 2298 |
| MOL001880 | OXL | Aspartate aminotransferase    | 2249 |
| MOL001880 | OXL | Beta-galactosidase            | 2592 |
| MOL001880 | OXL | Ferrichrome-iron receptor     | 2427 |
| MOL001880 | OXL | Histidinol dehydrogenase      | 3191 |
|           |     | Pyruvate dehydrogenase        |      |
| MOL001880 | OXL | [cytochrome]                  | 845  |
| MOL001880 | OXL | Acetyl-CoA acetyltransferase  | 2596 |
| MOL001880 | OXL | Formate dehydrogenase H       | 2638 |
| MOL001880 | OXL | Formate acetyltransferase 1   | 3178 |

|           |     |                              |      |
|-----------|-----|------------------------------|------|
| MOL001880 | OXL | Adenylosuccinate synthetase  | 2632 |
|           |     | Succinate dehydrogenase      |      |
| MOL001880 | OXL | flavoprotein subunit         | 5725 |
| MOL001880 | OXL | Alanine racemase             | 2453 |
| MOL001880 | OXL | Gag-Pol polyprotein          | 2237 |
| MOL001880 | OXL | Methionine synthase          | 2935 |
|           |     | C4-dicarboxylate transport   |      |
|           |     | transcriptional regulatory   |      |
| MOL001880 | OXL | protein dctD                 | 3336 |
|           |     | D-alanyl-D-alanine           |      |
| MOL001880 | OXL | carboxypeptidase             | 2461 |
|           |     | Isocitrate dehydrogenase     |      |
| MOL001880 | OXL | [NADP]                       | 2286 |
|           |     | Phosphoenolpyruvate          |      |
| MOL001880 | OXL | carboxykinase [ATP]          | 4794 |
| MOL001880 | OXL | Siroheme synthase            | 4318 |
| MOL001880 | OXL | Aconitate hydratase 2        | 3553 |
| MOL001880 | OXL | Monomeric sarcosine oxidase  | 2380 |
| MOL001880 | OXL | Bacillolysin                 | 2457 |
| MOL001880 | OXL | Dihydroxyacetone kinase      | 2397 |
| MOL001880 | OXL | Haloalkane dehalogenase      | 2281 |
|           |     | Gamma-aminobutyraldehyde     |      |
| MOL001880 | OXL | dehydrogenase                | 2881 |
|           |     | Fumarate reductase           |      |
| MOL001880 | OXL | flavoprotein subunit         | 2709 |
| MOL001880 | OXL | 2-isopropylmalate synthase   | 3179 |
|           |     | 1-aminocyclopropane-1-       |      |
| MOL001880 | OXL | carboxylate deaminase        | 2518 |
| MOL001880 | OXL | Hydroxylamine reductase      | 3274 |
|           |     | Nicotinate-nucleotide--      |      |
|           |     | dimethylbenzimidazole        |      |
| MOL001880 | OXL | phosphoribosyltransferase    | 2264 |
|           |     | Glucose--fructose            |      |
| MOL001880 | OXL | oxidoreductase               | 2826 |
| MOL001880 | OXL | Growth-inhibiting protein 18 | 3877 |
| MOL001880 | OXL |                              |      |
| MOL001880 | OXL |                              |      |
| MOL001880 | OXL |                              |      |
|           |     | Methylmalonyl-CoA            |      |
|           |     | carboxyltransferase 5S       |      |
| MOL001880 | OXL | subunit                      | 2983 |
|           |     | L-cysteine/cystine lyase C-  |      |
| MOL001880 | OXL | DES                          | 4802 |
| MOL001880 | OXL | Malonamidase E2              | 4600 |
| MOL001880 | OXL | Serotransferrin              | 566  |
|           |     | Glutamate dehydrogenase 1,   |      |
| MOL001880 | OXL | mitochondrial                | 201  |
|           |     | Aspartate aminotransferase,  |      |
| MOL001880 | OXL | mitochondrial                | 426  |
|           |     | Pyruvate kinase isozymes     |      |
| MOL001880 | OXL | M1/M2                        | 98   |

|           |     |                                                                                |      |
|-----------|-----|--------------------------------------------------------------------------------|------|
| MOL001880 | OXL | Serine--pyruvate<br>aminotransferase                                           | 349  |
| MOL001880 | OXL | Monocarboxylate transporter 7                                                  | 195  |
| MOL001880 | OXL | Alanine aminotransferase 1                                                     | 735  |
| MOL001880 | OXL | Aldehyde dehydrogenase X,<br>mitochondrial                                     | 531  |
| MOL001880 | OXL | Succinate dehydrogenase<br>[ubiquinone] flavoprotein<br>subunit, mitochondrial | 197  |
| MOL001880 | OXL | Cystathionine gamma-lyase                                                      | 868  |
| MOL001880 | OXL | Serine<br>hydroxymethyltransferase,<br>cytosolic                               | 367  |
| MOL001880 | OXL | Betaine--homocysteine S-<br>methyltransferase 1                                | 941  |
| MOL001880 | OXL | Succinyl-CoA:3-ketoacid-<br>coenzyme A transferase 2,<br>mitochondrial         | 4008 |
| MOL001880 | OXL | Alanine--glyoxylate<br>aminotransferase 2,<br>mitochondrial                    | 114  |
| MOL001880 | OXL | NADP-dependent malic enzyme                                                    | 666  |
| MOL001880 | OXL | Glutamate dehydrogenase 2,<br>mitochondrial                                    | 830  |
| MOL001880 | OXL | Alanyl-tRNA synthetase,<br>cytoplasmic                                         | 323  |
| MOL001880 | OXL | Glycine amidinotransferase,<br>mitochondrial                                   | 383  |
| MOL001880 | OXL | Calcium-transporting ATPase<br>type 2C member 1                                | 241  |
| MOL001880 | OXL | S-adenosylmethionine<br>synthetase isoform type-1                              | 453  |
| MOL001880 | OXL | Cysteine desulfurase,<br>mitochondrial                                         | 169  |
| MOL001880 | OXL | Alanine--glyoxylate<br>aminotransferase 2-like 2                               | 3899 |
| MOL001880 | OXL | Proton-coupled amino acid<br>transporter 1                                     | 593  |
| MOL001880 | OXL | Adenylosuccinate synthetase<br>isozyme 1                                       | 3978 |
| MOL001880 | OXL | L-lactate dehydrogenase A<br>chain                                             | 473  |
| MOL001880 | OXL | Glycine receptor subunit<br>alpha-2                                            | 820  |
| MOL001880 | OXL | 2-amino-3-ketobutyrate<br>coenzyme A ligase,<br>mitochondrial                  | 575  |
| MOL001880 | OXL | Pyruvate dehydrogenase E1<br>component subunit beta,<br>mitochondrial          | 110  |
| MOL001880 | OXL | Triosephosphate isomerase                                                      | 6346 |

|           |                           |                                                                 |      |
|-----------|---------------------------|-----------------------------------------------------------------|------|
| MOL001880 | OXL                       | Delta-1-pyrroline-5-carboxylate dehydrogenase, mitochondrial    | 271  |
| MOL001880 | OXL                       | NAD-dependent malic enzyme, mitochondrial                       | 166  |
| MOL001880 | OXL                       | Glycine receptor subunit alpha-3                                | 461  |
| MOL001880 | OXL                       | SHMT2 protein                                                   | 3884 |
| MOL001880 | OXL                       | NADP-dependent malic enzyme, mitochondrial                      | 363  |
| MOL001880 | OXL                       | L-lactate dehydrogenase B chain                                 | 77   |
| MOL001880 | OXL                       | Trypsin-3                                                       | 2886 |
| MOL001880 | OXL                       | Sigma factor sigB regulation protein rsbQ                       | 3490 |
| MOL001880 | OXL                       | Aromatic-amino-acid aminotransferase                            | 2537 |
| MOL001880 | OXL                       | Aldose reductase                                                | 822  |
| MOL001880 | OXL                       | Glycogen phosphorylase, muscle form                             | 1152 |
| MOL001880 | OXL                       | Fumarate hydratase class II                                     | 3486 |
| MOL001880 | OXL                       | N-acetylneuraminate lyase                                       | 3000 |
| MOL001880 | OXL                       | Phosphate-binding protein pstS precursor                        | 3694 |
| MOL001880 | OXL                       | Beta-amylase                                                    | 3365 |
| MOL001880 | OXL                       | Tyrosine-protein kinase transforming protein Src                | 2556 |
| MOL001880 | OXL                       | 2-hydroxy-6-oxo-7-methylocta-2,4-dienoate hydrolase             | 4674 |
| MOL001880 | OXL                       | Phosphotriesterase                                              | 5742 |
| MOL001880 | OXL                       | NADH-ubiquinone oxidoreductase 75 kDa subunit, mitochondrial    | 548  |
| MOL001880 | OXL                       | Gephyrin                                                        | 4532 |
| MOL001880 | OXL                       | Succinyl-CoA:3-ketoacid-coenzyme A transferase 1, mitochondrial | 4003 |
| MOL001880 | OXL                       | Prolyl 4-hydroxylase subunit alpha-2                            | 4000 |
| MOL001880 | OXL                       | Calcium-binding mitochondrial carrier protein Aralar2           | 513  |
| MOL001880 | OXL                       | Succinyl-CoA ligase [ADP-forming] beta-chain, mitochondrial     | 4009 |
| MOL001986 | $\beta$ -sitosterol       | Progesterone receptor                                           | 614  |
| MOL001986 | $\beta$ -sitosterol       | Nuclear receptor coactivator 2                                  | 6241 |
| MOL001986 | $\beta$ -sitosterol       | Mineralocorticoid receptor                                      | 737  |
| MOL002230 | (+)-Catechin-pentaacetate | Prothrombin                                                     | 54   |
| MOL002230 | (+)-Catechin-pentaacetate | Coagulation factor X                                            | 239  |

|           |                                                        |                                                  |      |
|-----------|--------------------------------------------------------|--------------------------------------------------|------|
| MOL002230 | (+)-Catechin-pentaacetate                              | Prostaglandin G/H synthase 2                     | 290  |
| MOL002231 | (-)-Epicatechin-pentaacetate                           | Prothrombin                                      | 54   |
| MOL002231 | (-)-Epicatechin-pentaacetate                           | Coagulation factor X                             | 239  |
| MOL002231 | (-)-Epicatechin-pentaacetate                           | Prostaglandin G/H synthase 2                     | 290  |
| MOL002231 | (-)-Epicatechin-pentaacetate                           | Nuclear receptor coactivator 2                   | 6241 |
| MOL002232 | 2-Cinnamoyl-glucose                                    | Beta-lactamase                                   | 2478 |
| MOL002235 | EUPATIN                                                | Nitric oxide synthase, inducible                 | 7    |
| MOL002235 | EUPATIN                                                | Androgen receptor                                | 146  |
| MOL002235 | EUPATIN                                                | Coagulation factor X                             | 239  |
| MOL002235 | EUPATIN                                                | Prostaglandin G/H synthase 2                     | 290  |
| MOL002235 | EUPATIN                                                | Coagulation factor VII                           | 369  |
| MOL002235 | EUPATIN                                                | DNA topoisomerase 2-alpha                        | 817  |
| MOL002235 | EUPATIN                                                | Estrogen receptor beta                           | 869  |
| MOL002235 | EUPATIN                                                | Dipeptidyl peptidase 4                           | 952  |
| MOL002235 | EUPATIN                                                | Heat shock protein HSP 90-alpha                  | 1939 |
| MOL002235 | EUPATIN                                                | Trypsin-1                                        | 3176 |
| MOL002235 | EUPATIN                                                | Nuclear receptor coactivator 2                   | 6241 |
| MOL002235 | EUPATIN                                                | Calmodulin                                       | 465  |
| MOL002235 | EUPATIN                                                | Prothrombin                                      | 54   |
| MOL002235 | EUPATIN                                                | Sodium channel protein type 5 subunit alpha      | 220  |
| MOL002235 | EUPATIN                                                | Vascular endothelial growth factor receptor 2    | 407  |
| MOL002235 | EUPATIN                                                | Peroxisome proliferator-activated receptor delta | 1502 |
| MOL002238 | 3-Hydroxy-25-norfriedel-3,1(10)-dien-2-one-30-oic acid | Mineralocorticoid receptor                       | 737  |
| MOL002240 | 5-Carboxy-7-hydroxy-2-methyl-benzopyran-gamma-         | Prostaglandin G/H synthase 1                     | 20   |
| MOL002240 | 5-Carboxy-7-hydroxy-2-methyl-benzopyran-gamma-         | Prothrombin                                      | 54   |
| MOL002240 | 5-Carboxy-7-hydroxy-2-methyl-benzopyran-gamma-         | Prostaglandin G/H synthase 2                     | 290  |
| MOL002240 | 5-Carboxy-7-hydroxy-2-methyl-benzopyran-gamma-         | Carbonic anhydrase 4                             | 592  |
| MOL002240 | 5-Carboxy-7-hydroxy-2-methyl-benzopyran-gamma-         | Dipeptidyl peptidase 4                           | 952  |
| MOL002240 | 5-Carboxy-7-hydroxy-2-methyl-benzopyran-gamma-         | Heat shock protein HSP 90-alpha                  | 1939 |
| MOL002240 | 5-Carboxy-7-hydroxy-2-methyl-benzopyran-gamma-         | Glutamate receptor 2                             | 921  |
| MOL002243 | Anthraglycoside B                                      | Coagulation factor X                             | 239  |
| MOL002243 | Anthraglycoside B                                      | DNA topoisomerase 2-alpha                        | 817  |

|           |                                                         |                                                                                |      |           |
|-----------|---------------------------------------------------------|--------------------------------------------------------------------------------|------|-----------|
| MOL002244 | Chrysophanol glucoside                                  | Coagulation factor X                                                           | 239  |           |
| MOL002244 | Chrysophanol glucoside                                  | Prostaglandin G/H synthase 2                                                   | 290  |           |
| MOL002244 | Chrysophanol glucoside                                  | Coagulation factor VII                                                         | 369  |           |
| MOL002244 | Chrysophanol glucoside                                  | DNA topoisomerase 2-alpha                                                      | 817  |           |
| MOL002244 | Chrysophanol glucoside                                  | Calmodulin                                                                     | 465  |           |
| MOL002247 | Emodin-6-glucoside                                      | Coagulation factor X                                                           | 239  |           |
| MOL002249 | gallocatechin                                           | Prostaglandin G/H synthase 1                                                   | 20   |           |
| MOL002249 | gallocatechin                                           | Estrogen receptor                                                              | 136  |           |
| MOL002249 | gallocatechin                                           | Prostaglandin G/H synthase 2                                                   | 290  |           |
| MOL002249 | gallocatechin                                           | Heat shock protein HSP 90-alpha                                                | 1939 |           |
| MOL002249 | gallocatechin                                           | Nuclear receptor coactivator 2                                                 | 6241 |           |
| MOL002249 | gallocatechin                                           | Matrix metalloproteinase-9                                                     | h001 | validated |
| MOL002256 | 1,8-dihydroxy-3-methoxy-2,6-dimethyl-9,10-anthraquinone | Prostaglandin G/H synthase 1                                                   | 20   |           |
| MOL002256 | 1,8-dihydroxy-3-methoxy-2,6-dimethyl-9,10-anthraquinone | Sodium channel protein type 5 subunit alpha                                    | 220  |           |
| MOL002256 | 1,8-dihydroxy-3-methoxy-2,6-dimethyl-9,10-anthraquinone | Coagulation factor X                                                           | 239  |           |
| MOL002256 | 1,8-dihydroxy-3-methoxy-2,6-dimethyl-9,10-anthraquinone | Prostaglandin G/H synthase 2                                                   | 290  |           |
| MOL002256 | 1,8-dihydroxy-3-methoxy-2,6-dimethyl-9,10-anthraquinone | Nitric-oxide synthase, endothelial                                             | 291  |           |
| MOL002256 | 1,8-dihydroxy-3-methoxy-2,6-dimethyl-9,10-anthraquinone | Coagulation factor VII                                                         | 369  |           |
| MOL002256 | 1,8-dihydroxy-3-methoxy-2,6-dimethyl-9,10-anthraquinone | Retinoic acid receptor RXR-alpha                                               | 459  |           |
| MOL002256 | 1,8-dihydroxy-3-methoxy-2,6-dimethyl-9,10-anthraquinone | DNA topoisomerase 2-alpha                                                      | 817  |           |
| MOL002256 | 1,8-dihydroxy-3-methoxy-2,6-dimethyl-9,10-anthraquinone | Heat shock protein HSP 90-alpha                                                | 1939 |           |
| MOL002256 | 1,8-dihydroxy-3-methoxy-2,6-dimethyl-9,10-anthraquinone | Phosphatidylinositol-4,5-bisphosphate 3-kinase catalytic subunit gamma isoform | 2404 |           |
| MOL002256 | 1,8-dihydroxy-3-methoxy-2,6-dimethyl-9,10-anthraquinone | Ig gamma-1 chain C region                                                      | 4785 |           |



|           |                                                                 |                                                                                          |   |      |
|-----------|-----------------------------------------------------------------|------------------------------------------------------------------------------------------|---|------|
| MOL002256 | 1,8-dihydroxy-3-methoxy-<br>2,6-dimethyl-9,10-<br>anthraquinone | Nuclear receptor coactivator                                                             | 2 | 6241 |
| MOL002256 | 1,8-dihydroxy-3-methoxy-<br>2,6-dimethyl-9,10-<br>anthraquinone | Nuclear receptor coactivator                                                             | 1 | 6228 |
| MOL002256 | 1,8-dihydroxy-3-methoxy-<br>2,6-dimethyl-9,10-<br>anthraquinone | Calmodulin                                                                               |   | 465  |
| MOL002258 | Physcion-9-O-beta-D-<br>glucopyranoside_qt                      | Prostaglandin G/H synthase 1                                                             | 1 | 20   |
| MOL002258 | Physcion-9-O-beta-D-<br>glucopyranoside_qt                      | Prostaglandin G/H synthase 2                                                             |   | 290  |
| MOL002258 | Physcion-9-O-beta-D-<br>glucopyranoside_qt                      | Coagulation factor VII                                                                   |   | 369  |
| MOL002258 | Physcion-9-O-beta-D-<br>glucopyranoside_qt                      | DNA topoisomerase 2-alpha                                                                |   | 817  |
| MOL002258 | Physcion-9-O-beta-D-<br>glucopyranoside_qt                      | Heat shock protein HSP 90-<br>alpha                                                      |   | 1939 |
| MOL002258 | Physcion-9-O-beta-D-<br>glucopyranoside_qt                      | Phosphatidylinositol-4,5-<br>bisphosphate 3-kinase<br>catalytic subunit gamma<br>isoform |   | 2404 |
| MOL002258 | Physcion-9-O-beta-D-<br>glucopyranoside_qt                      | Nuclear receptor coactivator                                                             | 2 | 6241 |
| MOL002258 | Physcion-9-O-beta-D-<br>glucopyranoside_qt                      | Nuclear receptor coactivator                                                             | 1 | 6228 |
| MOL002259 | Physciondiglucoside                                             | DNA topoisomerase 2-alpha                                                                |   | 817  |
| MOL002261 | ZINC04081604                                                    | Retinoic acid receptor RXR-<br>alpha                                                     |   | 459  |
| MOL002261 | ZINC04081604                                                    | Progesterone receptor                                                                    |   | 614  |
| MOL002261 | ZINC04081604                                                    | Mineralocorticoid receptor                                                               |   | 737  |
| MOL002261 | ZINC04081604                                                    | Nuclear receptor coactivator                                                             | 2 | 6241 |
| MOL002261 | ZINC04081604                                                    | Nuclear receptor coactivator                                                             | 1 | 6228 |
| MOL002262 | 5-[(Z)-2-(3-hydroxy-4-<br>methoxy-<br>phenyl)vinyl]resorcinol   | Prostaglandin G/H synthase 1                                                             |   | 20   |
| MOL002262 | 5-[(Z)-2-(3-hydroxy-4-<br>methoxy-<br>phenyl)vinyl]resorcinol   | Estrogen receptor                                                                        |   | 136  |
| MOL002262 | 5-[(Z)-2-(3-hydroxy-4-<br>methoxy-<br>phenyl)vinyl]resorcinol   | Prostaglandin G/H synthase 2                                                             |   | 290  |
| MOL002262 | 5-[(Z)-2-(3-hydroxy-4-<br>methoxy-<br>phenyl)vinyl]resorcinol   | Retinoic acid receptor RXR-<br>alpha                                                     |   | 459  |
| MOL002262 | 5-[(Z)-2-(3-hydroxy-4-<br>methoxy-<br>phenyl)vinyl]resorcinol   | Beta-2 adrenergic receptor                                                               |   | 766  |

|           |                                                       |                                                                                |      |           |
|-----------|-------------------------------------------------------|--------------------------------------------------------------------------------|------|-----------|
| MOL002262 | 5-[(Z)-2-(3-hydroxy-4-methoxy-phenyl)vinyl]resorcinol | Heat shock protein HSP 90-alpha                                                | 1939 |           |
| MOL002262 | 5-[(Z)-2-(3-hydroxy-4-methoxy-phenyl)vinyl]resorcinol | Amine oxidase [flavin-containing] B                                            | 3939 |           |
| MOL002262 | 5-[(Z)-2-(3-hydroxy-4-methoxy-phenyl)vinyl]resorcinol | cAMP-dependent protein kinase catalytic subunit alpha                          | 6263 |           |
| MOL002262 | 5-[(Z)-2-(3-hydroxy-4-methoxy-phenyl)vinyl]resorcinol | Nuclear receptor coactivator 2                                                 | 6241 |           |
| MOL002262 | 5-[(Z)-2-(3-hydroxy-4-methoxy-phenyl)vinyl]resorcinol | cAMP-dependent protein kinase inhibitor alpha                                  | 6264 |           |
| MOL002267 | Rhein diglucoside                                     | DNA topoisomerase 2-alpha                                                      | 817  |           |
| MOL002268 | rhein                                                 | Prostaglandin G/H synthase 1                                                   | 20   |           |
| MOL002268 | rhein                                                 | Prostaglandin G/H synthase 2                                                   | 290  |           |
| MOL002268 | rhein                                                 | Heat shock protein HSP 90-alpha                                                | 1939 |           |
| MOL002268 | rhein                                                 | Phosphatidylinositol-4,5-bisphosphate 3-kinase catalytic subunit gamma isoform | 2404 |           |
| MOL002268 | rhein                                                 | Nuclear receptor coactivator 2                                                 | 6241 |           |
| MOL002268 | rhein                                                 | Aldose reductase                                                               | 822  |           |
| MOL002268 | rhein                                                 | Transcription factor AP-1                                                      | 1629 | validated |
| MOL002270 | Rheinoside A_qt                                       | Carbonic anhydrase 2                                                           | 357  |           |
| MOL002279 | Serotonin                                             | Prostaglandin G/H synthase 1                                                   | 20   |           |
| MOL002279 | Serotonin                                             | D(1A) dopamine receptor                                                        | 23   |           |
| MOL002279 | Serotonin                                             | Muscarinic acetylcholine receptor M3                                           | 51   |           |
| MOL002279 | Serotonin                                             | Muscarinic acetylcholine receptor M1                                           | 103  |           |
| MOL002279 | Serotonin                                             | Beta-1 adrenergic receptor                                                     | 193  |           |
| MOL002279 | Serotonin                                             | Sodium channel protein type 5 subunit alpha                                    | 220  |           |
| MOL002279 | Serotonin                                             | Prostaglandin G/H synthase 2                                                   | 290  |           |
| MOL002279 | Serotonin                                             | Alpha-2C adrenergic receptor                                                   | 378  |           |
| MOL002279 | Serotonin                                             | Alpha-1A adrenergic receptor                                                   | 556  |           |
| MOL002279 | Serotonin                                             | Alpha-1B adrenergic receptor                                                   | 632  |           |
| MOL002279 | Serotonin                                             | Sodium-dependent dopamine transporter                                          | 713  |           |
| MOL002279 | Serotonin                                             | Beta-2 adrenergic receptor                                                     | 766  |           |
| MOL002279 | Serotonin                                             | Leukotriene A-4 hydrolase                                                      | 3060 |           |

|           |                                                                                                                      |                                                                                 |      |
|-----------|----------------------------------------------------------------------------------------------------------------------|---------------------------------------------------------------------------------|------|
| MOL002279 | Serotonin                                                                                                            | Amine oxidase [flavin-containing] B                                             | 3939 |
| MOL002279 | Serotonin                                                                                                            | cAMP-dependent protein kinase catalytic subunit alpha                           | 6263 |
| MOL002279 | Serotonin                                                                                                            | cAMP-dependent protein kinase inhibitor alpha                                   | 6264 |
| MOL002280 | Torachryson-8-O-beta-D-(6'-oxayl)-glucoside                                                                          | DNA topoisomerase 2-alpha                                                       | 817  |
| MOL002281 | Toralactone                                                                                                          | Nitric oxide synthase, inducible                                                | 7    |
| MOL002281 | Toralactone                                                                                                          | Prostaglandin G/H synthase 1                                                    | 20   |
| MOL002281 | Toralactone                                                                                                          | Estrogen receptor                                                               | 136  |
| MOL002281 | Toralactone                                                                                                          | Prostaglandin G/H synthase 2                                                    | 290  |
| MOL002281 | Toralactone                                                                                                          | Estrogen receptor beta                                                          | 869  |
| MOL002281 | Toralactone                                                                                                          | Heat shock protein HSP 90-alpha                                                 | 1939 |
| MOL002281 | Toralactone                                                                                                          | Phosphatidylinositol-4, 5-bisphosphate 3-kinase catalytic subunit gamma isoform | 2404 |
| MOL002281 | Toralactone                                                                                                          | Serine/threonine-protein kinase Chk1                                            | 5790 |
| MOL002281 | Toralactone                                                                                                          | cAMP-dependent protein kinase catalytic subunit alpha                           | 6263 |
| MOL002283 | [(2R, 3S, 4S, 5R, 6S)-6-[4-[(Z)-2-(3, 5-dihydroxyphenyl)ethenyl]phenoxy]-3, 4, 5-trihydroxyoxan-2-yl]methyl 3, 4, 5- | Tyrosine-protein phosphatase non-receptor type 1                                | 687  |
| MOL002284 | PIT                                                                                                                  | Prostaglandin G/H synthase 1                                                    | 20   |
| MOL002284 | PIT                                                                                                                  | Prostaglandin G/H synthase 2                                                    | 290  |
| MOL002284 | PIT                                                                                                                  | Amine oxidase [flavin-containing] B                                             | 3939 |
| MOL002284 | PIT                                                                                                                  | cAMP-dependent protein kinase catalytic subunit alpha                           | 6263 |
| MOL002285 | 1-O-Galloyl-glycerol                                                                                                 | Prostaglandin G/H synthase 2                                                    | 290  |
| MOL002286 | laccaic acid D                                                                                                       | Prostaglandin G/H synthase 1                                                    | 20   |
| MOL002286 | laccaic acid D                                                                                                       | Prostaglandin G/H synthase 2                                                    | 290  |
| MOL002286 | laccaic acid D                                                                                                       | Phosphatidylinositol-4, 5-bisphosphate 3-kinase catalytic subunit gamma isoform | 2404 |

|           |                                   |                                                  |      |           |
|-----------|-----------------------------------|--------------------------------------------------|------|-----------|
| MOL002288 | Emodin-1-O-beta-D-glucopyranoside | DNA topoisomerase 2-alpha                        | 817  |           |
| MOL002295 | cinnamic acid                     | Prostaglandin G/H synthase 1                     | 20   |           |
| MOL002295 | cinnamic acid                     | Prostaglandin G/H synthase 2                     | 290  |           |
| MOL002295 | cinnamic acid                     | Amine oxidase [flavin-containing] B              | 3939 |           |
| MOL002295 | cinnamic acid                     | Amine oxidase [flavin-containing] A              | 3941 |           |
| MOL002295 | cinnamic acid                     | Lysozyme                                         | 2300 |           |
| MOL002295 | cinnamic acid                     | Bacillolysin                                     | 2457 |           |
| MOL002295 | cinnamic acid                     | Maltase-glucoamylase, intestinal                 | 929  | validated |
| MOL002295 | cinnamic acid                     | Trans-cinnamate 4-monooxygenase                  | h001 | validated |
| MOL002295 | cinnamic acid                     | Tissue factor                                    | 2139 | validated |
| MOL002297 | Daucosterol_qt                    | Progesterone receptor                            | 614  |           |
| MOL002297 | Daucosterol_qt                    | Nuclear receptor coactivator 2                   | 6241 |           |
| MOL002299 | DMR                               | 4-aminobutyrate aminotransferase, mitochondrial  | 280  |           |
| MOL002299 | DMR                               | Aspartate aminotransferase, cytoplasmic          | 586  |           |
| MOL002299 | DMR                               | Tyrosine-protein phosphatase non-receptor type 1 | 687  |           |
| MOL002299 | DMR                               | Aldose reductase                                 | 822  |           |
| MOL002299 | DMR                               | Gamma-aminobutyric-acid receptor subunit alpha-1 | 872  |           |
| MOL002299 | DMR                               | Cathepsin D                                      | 1243 |           |
| MOL002299 | DMR                               |                                                  |      |           |
| MOL002299 | DMR                               | Aspartate aminotransferase                       | 2249 |           |
| MOL002299 | DMR                               | Ferrichrome-iron receptor                        | 2427 |           |
| MOL002299 | DMR                               | Adenylosuccinate synthetase                      | 2632 |           |
| MOL002299 | DMR                               | Bacillolysin                                     | 2457 |           |
| MOL002299 | DMR                               | 1-aminocyclopropane-1-carboxylate deaminase      | 2518 |           |
| MOL002299 | DMR                               | Growth-inhibiting protein 18                     | 3877 |           |
| MOL002299 | DMR                               | Aspartate aminotransferase, mitochondrial        | 426  |           |
| MOL002299 | DMR                               | S-adenosylmethionine synthetase isoform type-2   | 334  |           |
| MOL002299 | DMR                               | Prolyl 3-hydroxylase 3                           | 3951 |           |
| MOL002299 | DMR                               | S-adenosylmethionine synthetase isoform type-1   | 453  |           |
| MOL002299 | DMR                               | Triosephosphate isomerase                        | 6346 |           |
| MOL002299 | DMR                               | NAD-dependent malic enzyme, mitochondrial        | 166  |           |

|           |     |                                                     |      |
|-----------|-----|-----------------------------------------------------|------|
| MOL002299 | DMR | Proto-oncogene tyrosine-protein kinase Src          | 933  |
| MOL002299 | DMR | Cholinesterase                                      | 3923 |
| MOL002299 | DMR | Cytochrome P450-cam                                 | 2298 |
| MOL002299 | DMR | Formate acetyltransferase 1                         | 3178 |
|           |     | Nicotinate-nucleotide--dimethylbenzimidazole        |      |
| MOL002299 | DMR | phosphoribosyltransferase                           | 2264 |
|           |     | Adenylosuccinate synthetase                         |      |
| MOL002299 | DMR | isozyme 1                                           | 3978 |
|           |     | 10beta-Hydroxy-6beta-isobutyrylfuranoeremophil      |      |
| MOL002300 | ane | Muscarinic acetylcholine receptor M3                | 51   |
|           |     | 10beta-Hydroxy-6beta-isobutyrylfuranoeremophil      |      |
| MOL002300 | ane | Prothrombin                                         | 54   |
|           |     | 10beta-Hydroxy-6beta-isobutyrylfuranoeremophil      |      |
| MOL002300 | ane | Muscarinic acetylcholine receptor M1                | 103  |
|           |     | 10beta-Hydroxy-6beta-isobutyrylfuranoeremophil      |      |
| MOL002300 | ane | Prostaglandin G/H synthase 2                        | 290  |
|           |     | 10beta-Hydroxy-6beta-isobutyrylfuranoeremophil      |      |
| MOL002300 | ane | Gamma-aminobutyric-acid receptor subunit alpha-1    | 872  |
|           |     | 10beta-Hydroxy-6beta-isobutyrylfuranoeremophil      |      |
| MOL002300 | ane | Dipeptidyl peptidase 4                              | 952  |
|           |     | 10beta-Hydroxy-6beta-isobutyrylfuranoeremophil      |      |
| MOL002300 | ane | Neuronal acetylcholine receptor subunit alpha-7     | 4095 |
| MOL002301 | DLA | Prostaglandin G/H synthase 1                        | 20   |
| MOL002301 | DLA | Nitric-oxide synthase, brain                        | 76   |
|           |     | Succinate semialdehyde dehydrogenase, mitochondrial |      |
| MOL002301 | DLA | 4-aminobutyrate aminotransferase,                   | 170  |
|           |     | mitochondrial                                       |      |
| MOL002301 | DLA |                                                     | 280  |
| MOL002301 | DLA | DNA polymerase                                      | 338  |
|           |     | Glutamate [NMDA] receptor                           |      |
| MOL002301 | DLA | subunit zeta-1                                      | 401  |
| MOL002301 | DLA | Kynureninase                                        | 435  |
|           |     | Glycine receptor subunit                            |      |
| MOL002301 | DLA | alpha-1                                             | 482  |
|           |     | Aspartate aminotransferase,                         |      |
| MOL002301 | DLA | cytoplasmic                                         | 586  |
| MOL002301 | DLA | Glutamate receptor 1                                | 705  |
|           |     | Branched-chain-amino-acid aminotransferase,         |      |
| MOL002301 | DLA | mitochondrial                                       | 795  |

|           |     |                                                     |      |
|-----------|-----|-----------------------------------------------------|------|
| MOL002301 | DLA | Gamma-aminobutyric-acid<br>receptor subunit alpha-1 | 872  |
| MOL002301 | DLA | Proto-oncogene tyrosine-<br>protein kinase Src      | 933  |
| MOL002301 | DLA | Glycogen phosphorylase,<br>muscle form              | 1152 |
| MOL002301 | DLA | Cathepsin D                                         | 1243 |
| MOL002301 | DLA | Neutrophil collagenase                              | 2154 |
| MOL002301 | DLA | Macrophage metalloelastase                          | 2203 |
| MOL002301 | DLA | UDP-glucose 4-epimerase                             | 2762 |
| MOL002301 | DLA | M-phase inducer phosphatase 2                       | 3105 |
| MOL002301 | DLA | Thioredoxin reductase 1,<br>cytoplasmic             | 3610 |
| MOL002301 | DLA | Cholinesterase                                      | 3923 |
| MOL002301 | DLA | Xanthine<br>dehydrogenase/oxidase                   | 3947 |
| MOL002301 | DLA | Chymotrypsin-like elastase<br>family member 1       | 6260 |
| MOL002301 | DLA |                                                     |      |
| MOL002301 | DLA | Phosphonoacetaldehyde<br>hydrolase                  | 5363 |
| MOL002301 | DLA | Cytochrome P450-cam                                 | 2298 |
| MOL002301 | DLA | Aspartate aminotransferase                          | 2249 |
| MOL002301 | DLA | Beta-galactosidase                                  | 2592 |
| MOL002301 | DLA | Fumarate hydratase class II                         | 3486 |
| MOL002301 | DLA | Ferrichrome-iron receptor                           | 2427 |
| MOL002301 | DLA | Histidinol dehydrogenase                            | 3191 |
| MOL002301 | DLA | Acetyl-CoA acetyltransferase                        | 2596 |
| MOL002301 | DLA | Formate acetyltransferase 1                         | 3178 |
| MOL002301 | DLA | Adenylosuccinate synthetase                         | 2632 |
| MOL002301 | DLA | Beta-lactamase SHV-1<br>precursor                   | 3687 |
| MOL002301 | DLA | Beta-lactamase SHV-1                                | 6691 |
| MOL002301 | DLA | Alanine racemase                                    | 2453 |
| MOL002301 | DLA | Gag-Pol polyprotein                                 | 2237 |
| MOL002301 | DLA | D-alanyl-D-alanine<br>carboxypeptidase              | 2461 |
| MOL002301 | DLA | Monomeric sarcosine oxidase                         | 2380 |
| MOL002301 | DLA | Bacillolysin                                        | 2457 |
| MOL002301 | DLA | Dihydroxyacetone kinase                             | 2397 |
| MOL002301 | DLA | Haloalkane dehalogenase                             | 2281 |
| MOL002301 | DLA | Gamma-aminobutyraldehyde<br>dehydrogenase           | 2881 |
| MOL002301 | DLA | 2-isopropylmalate synthase                          | 3179 |

|           |     |                                                                               |      |
|-----------|-----|-------------------------------------------------------------------------------|------|
| MOL002301 | DLA | 2-hydroxy-6-oxo-7-methylocta-<br>2,4-dienoate hydrolase                       | 4674 |
| MOL002301 | DLA | 1-aminocyclopropane-1-<br>carboxylate deaminase                               | 2518 |
| MOL002301 | DLA | Nicotinate-nucleotide--<br>dimethylbenzimidazole<br>phosphoribosyltransferase | 2264 |
| MOL002301 | DLA | Glucose--fructose<br>oxidoreductase                                           | 2826 |
| MOL002301 | DLA | Growth-inhibiting protein 18<br>Methylmalonyl-CoA<br>carboxyltransferase 5S   | 3877 |
| MOL002301 | DLA | subunit                                                                       | 2983 |
| MOL002301 | DLA | Phosphotriesterase                                                            | 5742 |
| MOL002301 | DLA | Malonamidase E2                                                               | 4600 |
| MOL002301 | DLA | Coagulation factor XIII A<br>chain                                            | 6    |
| MOL002301 | DLA | Aspartate aminotransferase,<br>mitochondrial                                  | 426  |
| MOL002301 | DLA | Pyruvate kinase isozymes<br>M1/M2                                             | 98   |
| MOL002301 | DLA | Serine--pyruvate<br>aminotransferase                                          | 349  |
| MOL002301 | DLA | Alanine aminotransferase 1                                                    | 735  |
| MOL002301 | DLA | Cystathionine gamma-lyase                                                     | 868  |
| MOL002301 | DLA | Glycine N-methyltransferase                                                   | 411  |
| MOL002301 | DLA | Choline dehydrogenase,<br>mitochondrial                                       | 700  |
| MOL002301 | DLA | Alanine--glyoxylate<br>aminotransferase 2,<br>mitochondrial                   | 114  |
| MOL002301 | DLA | Gephyrin                                                                      | 4532 |
| MOL002301 | DLA | NADP-dependent malic enzyme                                                   | 666  |
| MOL002301 | DLA | Alanyl-tRNA synthetase,<br>cytoplasmic                                        | 323  |
| MOL002301 | DLA | Glycine amidinotransferase,<br>mitochondrial                                  | 383  |
| MOL002301 | DLA | Cysteine desulfurase,<br>mitochondrial                                        | 169  |
| MOL002301 | DLA | Alanine--glyoxylate<br>aminotransferase 2-like 2                              | 3899 |
| MOL002301 | DLA | Proton-coupled amino acid<br>transporter 1                                    | 593  |
| MOL002301 | DLA | Adenylosuccinate synthetase<br>isozyme 1                                      | 3978 |
| MOL002301 | DLA | L-lactate dehydrogenase A<br>chain                                            | 473  |
| MOL002301 | DLA | 2-amino-3-ketobutyrate<br>coenzyme A ligase,<br>mitochondrial                 | 575  |
| MOL002301 | DLA | Triosephosphate isomerase                                                     | 6346 |

|           |               |                                                                       |      |
|-----------|---------------|-----------------------------------------------------------------------|------|
| MOL002301 |               | NAD-dependent malic enzyme,<br>mitochondrial                          | 166  |
| MOL002301 | DLA           | 5-aminolevulinate synthase,<br>erythroid-specific,<br>mitochondrial   | 1088 |
| MOL002301 | DLA           | Calcium-binding mitochondrial<br>carrier protein Aralar2              | 513  |
| MOL002301 | DLA           | NADP-dependent malic enzyme,<br>mitochondrial                         | 363  |
| MOL002301 | DLA           | Trypsin-3                                                             | 2886 |
| MOL002301 | DLA           | Prostaglandin G/H synthase 2                                          | 290  |
| MOL002301 | DLA           | Urease alpha subunit                                                  | 370  |
| MOL002301 | DLA           | Ornithine aminotransferase,<br>mitochondrial                          | 472  |
| MOL002301 | DLA           | Pyruvate dehydrogenase<br>[cytochrome]                                | 845  |
| MOL002301 | DLA           | Beta-lactamase SHV-2<br>precursor                                     | 3701 |
| MOL002301 | DLA           | Alpha-ketoglutarate-dependent<br>taurine dioxygenase                  | 2529 |
| MOL002301 | DLA           | Betaine--homocysteine S-<br>methyltransferase 1                       | 941  |
| MOL002301 | DLA           | Pyruvate dehydrogenase E1<br>component subunit beta,<br>mitochondrial | 110  |
| MOL002301 | DLA           | SHMT2 protein                                                         | 3884 |
| MOL002301 | DLA           | Methylmalonyl-CoA<br>carboxyltransferase 12S<br>subunit               | 3240 |
| MOL002301 | DLA           | L-cysteine/cystine lyase C-<br>DES                                    | 4802 |
| MOL002301 | DLA           | Peroxisomal sarcosine oxidase                                         | 4061 |
| MOL002301 | DLA           | L-lactate dehydrogenase B<br>chain                                    | 77   |
| MOL002302 | RHAPONTIN     | Prostaglandin G/H synthase 2<br>4-aminobutyrate<br>aminotransferase,  | 290  |
| MOL000346 | succinic acid | mitochondrial                                                         | 280  |
| MOL000346 | succinic acid | Aspartate aminotransferase,<br>cytoplasmic                            | 586  |
| MOL000346 | succinic acid | Branched-chain-amino-acid<br>aminotransferase,<br>mitochondrial       | 795  |
| MOL000346 | succinic acid | Aldose reductase                                                      | 822  |
| MOL000346 | succinic acid | Proto-oncogene tyrosine-<br>protein kinase Src                        | 933  |
| MOL000346 | succinic acid | Cathepsin D                                                           | 1243 |



|           |               |                               |      |
|-----------|---------------|-------------------------------|------|
| MOL000346 | succinic acid | M-phase inducer phosphatase 2 | 3105 |
| MOL000346 | succinic acid | Cholinesterase                | 3923 |
| MOL000346 | succinic acid |                               |      |
| MOL000346 | succinic acid |                               |      |
| MOL000346 | succinic acid |                               |      |
| MOL000346 | succinic acid | Cytochrome P450-cam           | 2298 |
| MOL000346 | succinic acid | Aspartate aminotransferase    | 2249 |
| MOL000346 | succinic acid | Ferrichrome-iron receptor     | 2427 |
| MOL000346 | succinic acid | Monomeric sarcosine oxidase   | 2380 |
| MOL000346 | succinic acid | Bacillolysin                  | 2457 |
|           |               | Aromatic-amino-acid           |      |
| MOL000346 | succinic acid | aminotransferase              | 2537 |
|           |               | 1-aminocyclopropane-1-        |      |
| MOL000346 | succinic acid | carboxylate deaminase         | 2518 |
|           |               |                               |      |
| MOL000346 | succinic acid | Growth-inhibiting protein 18  | 3877 |
|           |               | Aspartate aminotransferase,   |      |
| MOL000346 | succinic acid | mitochondrial                 | 426  |
|           |               | S-adenosylmethionine          |      |
| MOL000346 | succinic acid | synthetase isoform type-1     | 453  |
| MOL000346 | succinic acid | Triosephosphate isomerase     | 6346 |
|           |               | NAD-dependent malic enzyme,   |      |
| MOL000346 | succinic acid | mitochondrial                 | 166  |
|           |               | NADP-dependent malic enzyme,  |      |
| MOL000346 | succinic acid | mitochondrial                 | 363  |
| MOL000346 | succinic acid | Trypsin-3                     | 2886 |
|           |               |                               |      |
| MOL000346 | succinic acid | Nitric-oxide synthase, brain  | 76   |
|           |               |                               |      |
|           |               | Succinate semialdehyde        |      |
| MOL000346 | succinic acid | dehydrogenase, mitochondrial  | 170  |
|           |               | Ornithine aminotransferase,   |      |
| MOL000346 | succinic acid | mitochondrial                 | 472  |
|           |               | Glycine receptor subunit      |      |
| MOL000346 | succinic acid | alpha-1                       | 482  |
|           |               |                               |      |
|           |               | Tyrosine-protein phosphatase  |      |
| MOL000346 | succinic acid | non-receptor type 1           | 687  |
|           |               | Gamma-aminobutyric-acid       |      |
| MOL000346 | succinic acid | receptor subunit alpha-1      | 872  |
|           |               | Thioredoxin reductase 1,      |      |
| MOL000346 | succinic acid | cytoplasmic                   | 3610 |
|           |               |                               |      |
|           |               | cAMP-dependent protein kinase |      |
| MOL000346 | succinic acid | catalytic subunit alpha       | 6263 |
|           |               |                               |      |
| MOL000346 | succinic acid | Acetyl-CoA acetyltransferase  | 2596 |
| MOL000346 | succinic acid | Formate acetyltransferase 1   | 3178 |
| MOL000346 | succinic acid | Adenylosuccinate synthetase   | 2632 |
| MOL000346 | succinic acid | Glucarate dehydratase         | 3708 |
|           |               | D-alanyl-D-alanine            |      |
| MOL000346 | succinic acid | carboxypeptidase              | 2461 |

|           |                 |                                                                                |                |
|-----------|-----------------|--------------------------------------------------------------------------------|----------------|
|           |                 | Deacetoxycephalosporin C                                                       |                |
| MOL000346 | succinic acid   | synthetase                                                                     | 3334           |
| MOL000346 | succinic acid   | Malate dehydrogenase                                                           | 2329           |
|           |                 | Fumarate reductase                                                             |                |
| MOL000346 | succinic acid   | flavoprotein subunit                                                           | 2709           |
| MOL000346 | succinic acid   | 2-isopropylmalate synthase                                                     | 3179           |
|           |                 | Nicotinate-nucleotide--<br>dimethylbenzimidazole                               |                |
| MOL000346 | succinic acid   | phosphoribosyltransferase                                                      | 2264           |
| MOL000346 | succinic acid   | Malonamidase E2                                                                | 4600           |
|           |                 | Glutamate dehydrogenase 1,<br>mitochondrial                                    | 201            |
|           |                 | Ornithine<br>carbamoyltransferase,<br>mitochondrial                            | 336            |
| MOL000346 | succinic acid   | Pyruvate kinase isozymes<br>M1/M2                                              | 98             |
|           |                 | Serine--pyruvate<br>aminotransferase                                           | 349            |
| MOL000346 | succinic acid   | Oxidoreductase                                                                 | 1410           |
|           |                 | Succinate dehydrogenase<br>[ubiquinone] flavoprotein<br>subunit, mitochondrial | 197            |
|           |                 | S-adenosylmethionine<br>synthetase isoform type-2                              | 334            |
| MOL000346 | succinic acid   | Prolyl 3-hydroxylase 1                                                         | 3945           |
| MOL000346 | succinic acid   | Prolyl 3-hydroxylase 3                                                         | 3951           |
|           |                 | Succinyl-CoA:3-ketoacid-<br>coenzyme A transferase 2,<br>mitochondrial         | 4008           |
| MOL000346 | succinic acid   | Mitochondrial dicarboxylate<br>carrier                                         | 4010           |
|           |                 | Prolyl 4-hydroxylase subunit<br>alpha-2                                        | 4000           |
|           |                 | Succinyl-CoA ligase [ADP-<br>forming] beta-chain,<br>mitochondrial             | 4009           |
| MOL000346 | succinic acid   | Haloalkane dehalogenase                                                        | 2281           |
|           |                 | Glucose--fructose<br>oxidoreductase                                            | 2826           |
| MOL000346 | succinic acid   | Caspase-3                                                                      | h001 validated |
| MOL000358 | beta-sitosterol | Progesterone receptor                                                          | 614            |
|           |                 | Nuclear receptor coactivator<br>2                                              | 6241           |
| MOL000358 | beta-sitosterol | Prostaglandin G/H synthase 1                                                   | 20             |
|           |                 | Prostaglandin G/H synthase 2                                                   | 290            |
|           |                 | Heat shock protein HSP 90-<br>alpha                                            | 1939           |

|           |                 |                                                                                           |      |           |
|-----------|-----------------|-------------------------------------------------------------------------------------------|------|-----------|
|           |                 | Phosphatidylinositol-4, 5-<br>bisphosphate 3-kinase<br>catalytic subunit gamma<br>isoform | 2404 |           |
| MOL000358 | beta-sitosterol | Potassium voltage-gated<br>channel subfamily H member 2                                   | 101  |           |
| MOL000358 | beta-sitosterol | cAMP-dependent protein kinase<br>catalytic subunit alpha                                  | 6263 |           |
| MOL000358 | beta-sitosterol | D(1A) dopamine receptor                                                                   | 23   |           |
| MOL000358 | beta-sitosterol | Muscarinic acetylcholine<br>receptor M3                                                   | 51   |           |
| MOL000358 | beta-sitosterol | Muscarinic acetylcholine<br>receptor M1                                                   | 103  |           |
| MOL000358 | beta-sitosterol | Sodium channel protein type 5<br>subunit alpha                                            | 220  |           |
| MOL000358 | beta-sitosterol | Gamma-aminobutyric-acid<br>receptor subunit alpha-2                                       | 423  |           |
| MOL000358 | beta-sitosterol | Muscarinic acetylcholine<br>receptor M4                                                   | 450  |           |
| MOL000358 | beta-sitosterol | cGMP-inhibited 3',5'-cyclic<br>phosphodiesterase A                                        | 485  |           |
| MOL000358 | beta-sitosterol | 5-hydroxytryptamine 2A<br>receptor                                                        | 502  |           |
| MOL000358 | beta-sitosterol | Gamma-aminobutyric-acid<br>receptor subunit alpha-5                                       | 523  |           |
| MOL000358 | beta-sitosterol | Alpha-1A adrenergic receptor                                                              | 556  |           |
| MOL000358 | beta-sitosterol | Gamma-aminobutyric-acid<br>receptor subunit alpha-3                                       | 580  |           |
| MOL000358 | beta-sitosterol | Muscarinic acetylcholine<br>receptor M2                                                   | 617  |           |
| MOL000358 | beta-sitosterol | Alpha-1B adrenergic receptor                                                              | 632  |           |
| MOL000358 | beta-sitosterol | Beta-2 adrenergic receptor                                                                | 766  |           |
| MOL000358 | beta-sitosterol | Neuronal acetylcholine<br>receptor subunit alpha-2                                        | 813  |           |
| MOL000358 | beta-sitosterol | Sodium-dependent serotonin<br>transporter                                                 | 824  |           |
| MOL000358 | beta-sitosterol | Mu-type opioid receptor                                                                   | 847  |           |
| MOL000358 | beta-sitosterol | Gamma-aminobutyric-acid<br>receptor subunit alpha-1                                       | 872  |           |
| MOL000358 | beta-sitosterol | Neuronal acetylcholine<br>receptor subunit alpha-7                                        | 4095 |           |
| MOL000358 | beta-sitosterol | Cytochrome P450-cam                                                                       | 2298 |           |
| MOL000358 | beta-sitosterol | Apoptosis regulator Bcl-2                                                                 | 273  | validated |
| MOL000358 | beta-sitosterol | Apoptosis regulator BAX                                                                   | h001 | validated |
| MOL000358 | beta-sitosterol | Caspase-9                                                                                 | h001 | validated |
| MOL000358 | beta-sitosterol | Transcription factor AP-1                                                                 | 1629 | validated |
| MOL000358 | beta-sitosterol | Caspase-3                                                                                 | h001 | validated |
| MOL000358 | beta-sitosterol | Caspase-8                                                                                 | h001 | validated |
| MOL000358 | beta-sitosterol | Protein kinase C alpha type                                                               | h001 | validated |

|           |                 |                                                                                          |      |           |
|-----------|-----------------|------------------------------------------------------------------------------------------|------|-----------|
| MOL000358 | beta-sitosterol | Transforming growth factor<br>beta-1<br>Serum                                            | h001 | validated |
| MOL000358 | beta-sitosterol | paraoxonase/arylesterase 1                                                               | 1198 | validated |
| MOL000358 | beta-sitosterol | Microtubule-associated<br>protein 2                                                      | 1852 | validated |
| MOL000471 | aloe-emodin     | Prostaglandin G/H synthase 1                                                             | 20   |           |
| MOL000471 | aloe-emodin     | Prostaglandin G/H synthase 2                                                             | 290  |           |
| MOL000471 | aloe-emodin     | Heat shock protein HSP 90-<br>alpha                                                      | 1939 |           |
| MOL000471 | aloe-emodin     | Phosphatidylinositol-4,5-<br>bisphosphate 3-kinase<br>catalytic subunit gamma<br>isoform | 2404 |           |
| MOL000471 | aloe-emodin     | cAMP-dependent protein kinase<br>catalytic subunit alpha                                 | 6263 |           |
| MOL000471 | aloe-emodin     | Nuclear receptor coactivator<br>2                                                        | 6241 |           |
| MOL000471 | aloe-emodin     | cAMP-dependent protein kinase<br>inhibitor alpha                                         | 6264 |           |
| MOL000471 | aloe-emodin     | Aldose reductase                                                                         | 822  |           |
| MOL000471 | aloe-emodin     | Ig gamma-1 chain C region                                                                | 4785 |           |
| MOL000471 | aloe-emodin     | Cyclin-dependent kinase<br>inhibitor 1                                                   | h001 | validated |
| MOL000471 | aloe-emodin     | Eukaryotic translation<br>initiation factor 6                                            | h001 | validated |
| MOL000471 | aloe-emodin     | Apoptosis regulator BAX                                                                  | h001 | validated |
| MOL000471 | aloe-emodin     | Tumor necrosis factor                                                                    | 777  | validated |
| MOL000471 | aloe-emodin     | Caspase-3                                                                                | h001 | validated |
| MOL000471 | aloe-emodin     | Cellular tumor antigen p53                                                               | 5788 | validated |
| MOL000471 | aloe-emodin     | Fatty acid synthase                                                                      | 1295 | validated |
| MOL000471 | aloe-emodin     | Protein kinase C alpha type                                                              | h001 | validated |
| MOL000471 | aloe-emodin     | Protein kinase C epsilon type                                                            | h001 | validated |
| MOL000471 | aloe-emodin     | Cell division control protein<br>2 homolog                                               | 1771 | validated |
| MOL000471 | aloe-emodin     | Proliferating cell nuclear<br>antigen                                                    | h001 | validated |
| MOL000471 | aloe-emodin     | Myc proto-oncogene protein                                                               | h001 | validated |
| MOL000471 | aloe-emodin     | Interleukin-1 beta                                                                       | 1654 | validated |
| MOL000471 | aloe-emodin     | Protein kinase C delta type                                                              | h001 | validated |
| MOL000471 | aloe-emodin     | G2/mitotic-specific cyclin-B1                                                            | h001 | validated |
| MOL000472 | emodin          | Prostaglandin G/H synthase 1                                                             | 20   |           |
| MOL000472 | emodin          | Prostaglandin G/H synthase 2                                                             | 290  |           |
| MOL000472 | emodin          | Coagulation factor VII                                                                   | 369  |           |
| MOL000472 | emodin          | Heat shock protein HSP 90-<br>alpha                                                      | 1939 |           |

|           |          |                                                                                |      |           |
|-----------|----------|--------------------------------------------------------------------------------|------|-----------|
|           |          | Phosphatidylinositol-4, 5-<br>bisphosphate 3-kinase<br>catalytic subunit gamma |      |           |
| MOL000472 | emodin   | isoform                                                                        | 2404 |           |
|           |          | cAMP-dependent protein kinase                                                  |      |           |
| MOL000472 | emodin   | catalytic subunit alpha                                                        | 6263 |           |
| MOL000472 | emodin   | Ig gamma-1 chain C region                                                      | 4785 |           |
| MOL000472 | emodin   | Coagulation factor X                                                           | 239  |           |
|           |          | Vascular endothelial growth                                                    |      |           |
| MOL000472 | emodin   | factor receptor 2                                                              | 407  | validated |
| MOL000472 | emodin   | DNA topoisomerase 2-alpha                                                      | 817  |           |
|           |          | Nuclear receptor coactivator                                                   |      |           |
| MOL000472 | emodin   | 2                                                                              | 6241 |           |
|           |          | Nuclear receptor coactivator                                                   |      |           |
| MOL000472 | emodin   | 1                                                                              | 6228 |           |
| MOL000472 | emodin   | Calmodulin                                                                     | 465  |           |
|           |          | Cyclin-dependent kinase                                                        |      |           |
| MOL000472 | emodin   | inhibitor 1                                                                    | h001 | validated |
|           |          | Vascular endothelial growth                                                    |      |           |
| MOL000472 | emodin   | factor receptor 1                                                              | 32   | validated |
| MOL000472 | emodin   | Matrix metalloproteinase-9                                                     | h001 | validated |
| MOL000472 | emodin   |                                                                                |      | validated |
| MOL000472 | emodin   | Tumor necrosis factor                                                          | 777  | validated |
| MOL000472 | emodin   | Caspase-3                                                                      | h001 | validated |
| MOL000472 | emodin   | Cellular tumor antigen p53                                                     | 5788 | validated |
|           |          |                                                                                |      |           |
| MOL000472 | emodin   | Protein kinase C epsilon type                                                  | h001 | validated |
| MOL000472 | emodin   | Interstitial collagenase                                                       | 1167 | validated |
|           |          | Peroxisome proliferator-                                                       |      |           |
| MOL000472 | emodin   | activated receptor gamma                                                       | h001 | validated |
| MOL000472 | emodin   | Myc proto-oncogene protein                                                     | h001 | validated |
| MOL000472 | emodin   | Cytochrome P450 1A1                                                            | h001 | validated |
| MOL000472 | emodin   | Interleukin-1 beta                                                             | 1654 | validated |
| MOL000472 | emodin   | Protein kinase C delta type                                                    | h001 | validated |
|           |          | Granulocyte-macrophage                                                         |      |           |
| MOL000472 | emodin   | colony-stimulating factor                                                      | h001 | validated |
|           |          | Transforming growth factor                                                     |      |           |
| MOL000472 | emodin   | beta-1                                                                         | h001 | validated |
| MOL000472 | emodin   | Actin, aortic smooth muscle                                                    | h001 | validated |
|           |          | Amine oxidase [flavin-                                                         |      |           |
| MOL000472 | emodin   | containing] B                                                                  | 3939 | validated |
| MOL000472 | emodin   | Tyrosine-protein kinase BTK                                                    | 2355 | validated |
|           |          | Solute carrier family 2,                                                       |      |           |
|           |          | facilitated glucose                                                            |      |           |
| MOL000472 | emodin   | transporter member 4                                                           | h001 | validated |
|           |          | Vascular endothelial growth                                                    |      |           |
| MOL000472 | emodin   | factor receptor 3                                                              | 26   | validated |
|           |          | Solute carrier family 2,                                                       |      |           |
|           |          | facilitated glucose                                                            |      |           |
| MOL000472 | emodin   | transporter member 1                                                           | h001 | validated |
|           |          |                                                                                |      |           |
| MOL000476 | Physcion | Prostaglandin G/H synthase 1                                                   | 20   |           |

|           |                                |                                                                                 |      |           |
|-----------|--------------------------------|---------------------------------------------------------------------------------|------|-----------|
| MOL000476 | Physcion                       | Sodium channel protein type 5 subunit alpha                                     | 220  |           |
| MOL000476 | Physcion                       | Prostaglandin G/H synthase 2                                                    | 290  |           |
| MOL000476 | Physcion                       | Nitric-oxide synthase, endothelial                                              | 291  |           |
| MOL000476 | Physcion                       | Coagulation factor VII                                                          | 369  |           |
| MOL000476 | Physcion                       | DNA topoisomerase 2-alpha                                                       | 817  |           |
| MOL000476 | Physcion                       | Heat shock protein HSP 90-alpha                                                 | 1939 |           |
| MOL000476 | Physcion                       | Phosphatidylinositol-4, 5-bisphosphate 3-kinase catalytic subunit gamma isoform | 2404 |           |
| MOL000476 | Physcion                       | Beta-lactamase                                                                  | 2478 |           |
| MOL000476 | Physcion                       | Ig gamma-1 chain C region                                                       | 4785 |           |
| MOL000476 | Physcion                       | Nuclear receptor coactivator 2                                                  | 6241 |           |
| MOL000476 | Physcion                       | Nuclear receptor coactivator 1                                                  | 6228 |           |
| MOL000476 | Physcion                       | cAMP-dependent protein kinase inhibitor alpha                                   | 6264 |           |
| MOL000476 | Physcion                       | Calmodulin                                                                      | 465  |           |
| MOL000476 | Physcion                       | cAMP-dependent protein kinase catalytic subunit alpha                           | 6263 |           |
| MOL000476 | Physcion                       | Coagulation factor X                                                            | 239  |           |
| MOL000476 | Physcion                       | Retinoic acid receptor RXR-alpha                                                | 459  |           |
| MOL000513 | 3, 4, 5-trihydroxybenzoic acid | Prostaglandin G/H synthase 1                                                    | 20   |           |
| MOL000513 | 3, 4, 5-trihydroxybenzoic acid | Prostaglandin G/H synthase 2                                                    | 290  |           |
| MOL000513 | 3, 4, 5-trihydroxybenzoic acid | Amine oxidase [flavin-containing] B                                             | 3939 |           |
| MOL000513 | 3, 4, 5-trihydroxybenzoic acid | Progesterone receptor                                                           | 614  |           |
| MOL000513 | 3, 4, 5-trihydroxybenzoic acid | Tyrosine-protein phosphatase non-receptor type 1                                | 687  |           |
| MOL000513 | 3, 4, 5-trihydroxybenzoic acid | DNA topoisomerase 2-alpha                                                       | 817  |           |
| MOL000513 | 3, 4, 5-trihydroxybenzoic acid | Heat shock protein HSP 90-alpha                                                 | 1939 |           |
| MOL000513 | 3, 4, 5-trihydroxybenzoic acid | Phosphatidylinositol-4, 5-bisphosphate 3-kinase catalytic subunit gamma isoform | 2404 |           |
| MOL000513 | 3, 4, 5-trihydroxybenzoic acid | Caspase-9                                                                       | h001 | validated |
| MOL000513 | 3, 4, 5-trihydroxybenzoic acid | Caspase-3                                                                       | h001 | validated |

|           |                              |                                                       |      |           |
|-----------|------------------------------|-------------------------------------------------------|------|-----------|
| MOL000513 | 3,4,5-trihydroxybenzoic acid | Cellular tumor antigen p53                            | 5788 | validated |
| MOL000513 | 3,4,5-trihydroxybenzoic acid | Fatty acid synthase                                   | 1295 | validated |
| MOL000513 | 3,4,5-trihydroxybenzoic acid | Tumor necrosis factor ligand superfamily member 6     | h001 | validated |
| MOL000513 | 3,4,5-trihydroxybenzoic acid | Microsomal glutathione S-transferase 1                | 4032 | validated |
| MOL000513 | 3,4,5-trihydroxybenzoic acid | Cytochrome P450 3A43                                  | h001 | validated |
| MOL000096 | (-)-catechin                 | Prostaglandin G/H synthase 1                          | 20   |           |
| MOL000096 | (-)-catechin                 | Estrogen receptor                                     | 136  |           |
| MOL000096 | (-)-catechin                 | Prostaglandin G/H synthase 2                          | 290  |           |
| MOL000096 | (-)-catechin                 | Heat shock protein HSP 90-alpha                       | 1939 |           |
| MOL000096 | (-)-catechin                 | Beta-lactamase                                        | 2478 |           |
| MOL000096 | (-)-catechin                 | cAMP-dependent protein kinase catalytic subunit alpha | 6263 |           |
| MOL000096 | (-)-catechin                 | Nuclear receptor coactivator 2                        | 6241 |           |
| MOL000096 | (-)-catechin                 | Calmodulin                                            | 465  |           |
| MOL000096 | (-)-catechin                 | Fatty acid synthase                                   | 1295 | validated |
| MOL000096 | (-)-catechin                 | Peroxisome proliferator-activated receptor gamma      | h001 | validated |
| MOL000096 | (-)-catechin                 | Krueppel-like factor 7                                | h001 | validated |
