# Supplementary material for: The Study of Yin-Chen-Hao-Tang Preventing and Treating Alcoholic Fatty Liver Disease through PPAR Signaling Pathway Based on Network Pharmacology and RNA-Seq Transcriptomics
Source: Hindawi journal article supplement (doi:10.1155/2021/8917993), 2021-12-31
Supplement: f1 [file 8917993.f1.zip]

| AverageShortest<br>PathLength | BetweennessC<br>entrality | ClosenessC<br>rality | ClusteringC<br>oefficient | Degree | Eccentricity | IsSingle<br>Node | name               |
|-------------------------------|---------------------------|----------------------|---------------------------|--------|--------------|------------------|--------------------|
| 1.401294498                   | 0.090222052               | 0.713625866          | 0.2449543                 | 187    |              | 3                | FALSE INS          |
| 1.436893204                   | 0.053803878               | 0.695945946          | 0.271546                  | 179    |              | 3                | FALSE AKT1         |
| 1.495145631                   | 0.039357407               | 0.668831169          | 0.3040976                 | 163    |              | 3                | FALSE IL6          |
| 1.501618123                   | 0.045943614               | 0.665948276          | 0.2994565                 | 161    |              | 3                | FALSE TP53         |
| 1.566343042                   | 0.026984596               | 0.638429752          | 0.3587873                 | 140    |              | 3                | FALSE CASP3        |
| 1.601941748                   | 0.017053805               | 0.624242424          | 0.3918967                 | 131    |              | 3                | FALSE JUN          |
| 1.601941748                   | 0.023566407               | 0.624242424          | 0.3587358                 | 130    |              | 3                | FALSE EGFR         |
| 1.605177994                   | 0.020349754               | 0.622983871          | 0.3674419                 | 130    |              | 3                | FALSE MYC          |
| 1.631067961                   | 0.010806779               | 0.613095238          | 0.424072                  | 127    |              | 3                | FALSE STAT3        |
| 1.634304207                   | 0.018783076               | 0.611881188          | 0.3786667                 | 126    |              | 3                | FALSE SRC          |
| 1.637540453                   | 0.018563641               | 0.610671937          | 0.3910968                 | 125    |              | 3                | FALSE MAPK1        |
| 1.624595469                   | 0.012474778               | 0.615537849          | 0.4094194                 | 125    |              | 3                | FALSE MAPK8        |
| 1.656957929                   | 0.014291714               | 0.603515625          | 0.4275843                 | 122    |              | 3                | FALSE MMP9         |
| 1.631067961                   | 0.014919644               | 0.613095238          | 0.4232782                 | 121    |              | 3                | FALSE PTGS2        |
| 1.647249191                   | 0.015486062               | 0.607072692          | 0.4275744                 | 119    |              | 3                | FALSE CXCL8        |
| 1.689320388                   | 0.010496802               | 0.591954023          | 0.4417014                 | 110    |              | 3                | FALSE IL1B         |
| 1.71197411                    | 0.011397279               | 0.584120983          | 0.416234                  | 108    |              | 3                | FALSE FOS          |
| 1.692556634                   | 0.009592901               | 0.59082218           | 0.4182684                 | 107    |              | 3                | FALSE ESR1         |
| 1.699029126                   | 0.00717313                | 0.588571429          | 0.4699348                 | 107    |              | 3                | FALSE TLR4         |
| 1.702265372                   | 0.008210883               | 0.587452471          | 0.485348                  | 105    |              | 3                | FALSE CCL2         |
| 1.72815534                    | 0.005548035               | 0.578651685          | 0.460299                  | 102    |              | 3                | FALSE CCND1        |
| 1.718446602                   | 0.006103283               | 0.581920904          | 0.5119394                 | 102    |              | 3                | FALSE IL10         |
| 1.731391586                   | 0.017478127               | 0.577570093          | 0.3919373                 | 95     |              | 3                | FALSE HSP90AA<br>1 |
| 1.750809061                   | 0.010926113               | 0.57116451           | 0.518925                  | 95     |              | 3                | FALSE MMP2         |
| 1.737864078                   | 0.011432143               | 0.575418994          | 0.3980782                 | 94     |              | 3                | FALSE CREB1        |
| 1.734627832                   | 0.009634772               | 0.576492537          | 0.426447                  | 94     |              | 3                | FALSE PPARG        |
| 1.74433657                    | 0.004500498               | 0.573283859          | 0.5430108                 | 93     |              | 3                | FALSE ICAM1        |
| 1.750809061                   | 0.00660551                | 0.57116451           | 0.5130902                 | 93     |              | 3                | FALSE IL4          |
| 1.731391586                   | 0.01065507                | 0.577570093          | 0.4124542                 | 91     |              | 3                | FALSE NOS3         |
| 1.766990291                   | 0.007846255               | 0.565934066          | 0.4893883                 | 90     |              | 3                | FALSE RELA         |
| 1.760517799                   | 0.003651266               | 0.568014706          | 0.5313358                 | 90     |              | 3                | FALSE TLR2         |
| 1.773462783                   | 0.003333269               | 0.563868613          | 0.5347293                 | 89     |              | 3                | FALSE FGF2         |
| 1.757281553                   | 0.007739484               | 0.569060773          | 0.5252809                 | 89     |              | 3                | FALSE IL2          |
| 1.757281553                   | 0.006485498               | 0.569060773          | 0.4555904                 | 88     |              | 3                | FALSE ERBB2        |
| 1.776699029                   | 0.004086081               | 0.56284153           | 0.5355277                 | 88     |              | 3                | FALSE MAPK14       |
| 1.796116505                   | 0.003289964               | 0.556756757          | 0.5421687                 | 84     |              | 3                | FALSE BCL2L1       |
| 1.792880259                   | 0.004774462               | 0.557761733          | 0.5126219                 | 84     |              | 3                | FALSE STAT1        |
| 1.786407767                   | 0.008290763               | 0.559782609          | 0.4655766                 | 84     |              | 3                | FALSE EDN1         |
| 1.776699029                   | 0.012364908               | 0.56284153           | 0.4360858                 | 83     |              | 3                | FALSE AR           |
| 1.789644013                   | 0.012095503               | 0.558770344          | 0.4084631                 | 83     |              | 3                | FALSE BDNF         |
| 1.799352751                   | 0.003634453               | 0.555755396          | 0.5700617                 | 81     |              | 3                | FALSE VCAM1        |
| 1.796116505                   | 0.00523462                | 0.556756757          | 0.5274691                 | 81     |              | 3                | FALSE SERPINE1     |
| 1.796116505                   | 0.00367629                | 0.556756757          | 0.4985394                 | 79     |              | 3                | FALSE RHOA         |
| 1.783171521                   | 0.006518453               | 0.560798548          | 0.5202856                 | 79     |              | 3                | FALSE HMOX1        |
| 1.779935275                   | 0.006792187               | 0.561818182          | 0.4826355                 | 79     |              | 3                | FALSE CRP          |
| 1.812297735                   | 0.003609757               | 0.551785714          | 0.5485232                 | 79     |              | 3                | FALSE CASP8        |
| 1.825242718                   | 0.001606452               | 0.54787234           | 0.6329825                 | 76     |              | 3                | FALSE CSF2         |
| 1.815533981                   | 0.001706526               | 0.550802139          | 0.6287719                 | 76     |              | 3                | FALSE IFNG         |
| 1.815533981                   | 0.008174407               | 0.550802139          | 0.4924102                 | 74     |              | 3                | FALSE MPO          |
| 1.83171521                    | 0.001741999               | 0.545936396          | 0.6000761                 | 73     |              | 3                | FALSE PECAM1       |
| 1.838187702                   | 0.003143652               | 0.544014085          | 0.5852359                 | 73     |              | 3                | FALSE SPP1         |
| 1.854368932                   | 0.003217171               | 0.539267016          | 0.5445205                 | 73     |              | 3                | FALSE NFKB1        |
| 1.812297735                   | 0.004160883               | 0.551785714          | 0.5199531                 | 72     |              | 3                | FALSE HIF1A        |
| 1.838187702                   | 0.001993966               | 0.544014085          | 0.5865303                 | 69     |              | 3                | FALSE KDR          |
| 1.83171521                    | 0.002028129               | 0.545936396          | 0.6666667                 | 69     |              | 3                | FALSE TGFB1        |

|             |             |             |           |    |   |       |        |
|-------------|-------------|-------------|-----------|----|---|-------|--------|
| 1.854368932 | 0.003309075 | 0.539267016 | 0.5788576 | 69 | 3 | FALSE | PLG    |
| 1.815533981 | 0.015143665 | 0.550802139 | 0.3410222 | 67 | 3 | FALSE | F2     |
| 1.870550162 | 0.002089393 | 0.534602076 | 0.588345  | 66 | 3 | FALSE | CDKN1A |
| 1.828478964 | 0.006423614 | 0.546902655 | 0.4879808 | 65 | 3 | FALSE | CAV1   |
| 1.851132686 | 0.002110557 | 0.54020979  | 0.63125   | 65 | 3 | FALSE | CXCL10 |
| 1.84789644  | 0.003654722 | 0.541155867 | 0.4653846 | 65 | 3 | FALSE | SP1    |
| 1.812297735 | 0.019922246 | 0.551785714 | 0.359127  | 64 | 3 | FALSE | GPT    |
| 1.841423948 | 0.00474064  | 0.543057996 | 0.5248016 | 64 | 3 | FALSE | NR3C1  |
| 1.883495146 | 0.002904276 | 0.530927835 | 0.6081349 | 64 | 3 | FALSE | IL13   |
| 1.834951456 | 0.00495793  | 0.544973545 | 0.609319  | 63 | 3 | FALSE | NOS2   |
| 1.844660194 | 0.00958012  | 0.542105263 | 0.3881544 | 62 | 3 | FALSE | SOD1   |
| 1.886731392 | 0.001369886 | 0.530017153 | 0.7131148 | 61 | 3 | FALSE | MMP1   |
| 1.8802589   | 0.001204998 | 0.531841652 | 0.6409836 | 61 | 4 | FALSE | CASP9  |
| 1.893203883 | 0.001280446 | 0.528205128 | 0.6398907 | 61 | 3 | FALSE | MCL1   |
| 1.896440129 | 9.34E-04    | 0.527303754 | 0.6553672 | 60 | 3 | FALSE | NFKBIA |
| 1.893203883 | 0.001845005 | 0.528205128 | 0.6881356 | 60 | 4 | FALSE | MMP3   |
| 1.8802589   | 0.001684843 | 0.531841652 | 0.5464641 | 59 | 3 | FALSE | PGR    |
| 1.902912621 | 7.68E-04    | 0.525510204 | 0.6890707 | 59 | 3 | FALSE | CD40   |
| 1.906148867 | 8.92E-04    | 0.524617997 | 0.6885965 | 57 | 3 | FALSE | SELE   |
| 1.909385113 | 0.001394123 | 0.523728814 | 0.7161654 | 57 | 4 | FALSE | FASLG  |
| 1.899676375 | 6.94E-04    | 0.526405451 | 0.7067669 | 57 | 3 | FALSE | CASP1  |
| 1.889967638 | 0.004849343 | 0.529109589 | 0.5474026 | 56 | 3 | FALSE | AHR    |
| 1.919093851 | 9.43E-04    | 0.521079258 | 0.6967532 | 56 | 3 | FALSE | CD40LG |
| 1.925566343 | 0.001796257 | 0.519327731 | 0.5856045 | 54 | 3 | FALSE | CDK4   |
| 1.922330097 | 0.002521218 | 0.52020202  | 0.5391872 | 53 | 4 | FALSE | MAPK10 |
| 1.909385113 | 0.0018907   | 0.523728814 | 0.58418   | 53 | 3 | FALSE | PLAU   |
| 1.925566343 | 0.00298942  | 0.519327731 | 0.3800905 | 52 | 3 | FALSE | PRKCA  |
| 1.957928803 | 0.001970236 | 0.510743802 | 0.5356863 | 51 | 3 | FALSE | CDK1   |
| 1.941747573 | 0.001865828 | 0.515       | 0.6282353 | 51 | 3 | FALSE | SELP   |
| 1.941747573 | 0.003072595 | 0.515       | 0.5835294 | 51 | 3 | FALSE | CDK2   |
| 1.944983819 | 9.67E-04    | 0.514143095 | 0.6745098 | 51 | 3 | FALSE | IL1A   |
| 1.902912621 | 0.004941776 | 0.525510204 | 0.3771429 | 50 | 3 | FALSE | SLC2A4 |
| 1.919093851 | 0.001507259 | 0.521079258 | 0.5281633 | 50 | 3 | FALSE | GSK3B  |
| 1.902912621 | 0.002929183 | 0.525510204 | 0.3926531 | 50 | 3 | FALSE | PPARA  |
| 1.893203883 | 0.006894912 | 0.528205128 | 0.355102  | 50 | 3 | FALSE | GCG    |
| 1.993527508 | 0.001074316 | 0.501623377 | 0.6604082 | 50 | 4 | FALSE | CXCL2  |
| 2           | 8.76E-04    | 0.5         | 0.6777211 | 49 | 4 | FALSE | CCNB1  |
| 1.919093851 | 0.001026236 | 0.521079258 | 0.6386054 | 49 | 3 | FALSE | PARP1  |
| 1.941747573 | 0.002770433 | 0.515       | 0.4051418 | 48 | 3 | FALSE | LPL    |
| 1.964401294 | 0.001068123 | 0.509060956 | 0.6614246 | 47 | 3 | FALSE | CCNA2  |
| 1.990291262 | 6.80E-04    | 0.502439024 | 0.719704  | 47 | 3 | FALSE | CD86   |
| 1.98381877  | 0.002821353 | 0.504078303 | 0.4048309 | 46 | 4 | FALSE | PRKCD  |
| 1.98381877  | 4.24E-04    | 0.504078303 | 0.7497585 | 46 | 4 | FALSE | IRF1   |
| 1.906148867 | 0.001988091 | 0.524617997 | 0.6347826 | 46 | 3 | FALSE | HSPB1  |
| 1.941747573 | 0.001123805 | 0.515       | 0.6151515 | 45 | 3 | FALSE | IGF2   |
| 1.932038835 | 0.001414884 | 0.51758794  | 0.5739958 | 44 | 3 | FALSE | NFE2L2 |
| 1.964401294 | 9.81E-04    | 0.509060956 | 0.6712474 | 44 | 3 | FALSE | F3     |
| 1.990291262 | 7.07E-04    | 0.502439024 | 0.6479915 | 44 | 3 | FALSE | RB1    |
| 2.009708738 | 3.38E-04    | 0.497584541 | 0.7399577 | 44 | 3 | FALSE | CD80   |
| 2.042071197 | 0.001975464 | 0.489698891 | 0.4978858 | 44 | 4 | FALSE | ITGB2  |
| 1.938511327 | 6.95E-04    | 0.515859766 | 0.7536998 | 44 | 3 | FALSE | FLT1   |
| 1.912621359 | 0.00613243  | 0.52284264  | 0.4706534 | 43 | 3 | FALSE | SLC2A1 |
| 1.957928803 | 0.001224455 | 0.510743802 | 0.5891473 | 43 | 3 | FALSE | NCF1   |
| 1.964401294 | 0.002234614 | 0.509060956 | 0.4108527 | 43 | 3 | FALSE | PRKCB  |
| 1.919093851 | 0.002327336 | 0.521079258 | 0.6046512 | 43 | 3 | FALSE | HSPA5  |
| 1.961165049 | 0.003091618 | 0.50990099  | 0.4086379 | 43 | 3 | FALSE | APOA1  |
| 1.922330097 | 0.006216303 | 0.52020202  | 0.2752613 | 42 | 3 | FALSE | CYP3A4 |
| 1.96763754  | 6.81E-04    | 0.508223684 | 0.7351916 | 42 | 3 | FALSE | RUNX2  |

|             |             |             |           |    |   |       |         |
|-------------|-------------|-------------|-----------|----|---|-------|---------|
| 1.964401294 | 0.001218395 | 0.509060956 | 0.6922184 | 42 | 3 | FALSE | MUC1    |
| 1.98381877  | 0.002412874 | 0.504078303 | 0.6402439 | 41 | 4 | FALSE | GJA1    |
| 1.977346278 | 2.86E-04    | 0.505728314 | 0.7012195 | 41 | 4 | FALSE | IKBKB   |
| 1.944983819 | 0.00934966  | 0.514143095 | 0.3304878 | 41 | 4 | FALSE | LDHA    |
| 1.993527508 | 0.001434995 | 0.501623377 | 0.4564103 | 40 | 4 | FALSE | NCOA1   |
| 1.954692557 | 0.001094768 | 0.511589404 | 0.6153846 | 40 | 3 | FALSE | IGFBP3  |
| 2.006472492 | 0.007084578 | 0.498387097 | 0.3076923 | 39 | 3 | FALSE | GOT2    |
| 1.974110032 | 0.001607553 | 0.506557377 | 0.5533063 | 39 | 4 | FALSE | CTSB    |
| 2           | 7.20E-04    | 0.5         | 0.608637  | 39 | 4 | FALSE | BTB     |
| 1.964401294 | 0.002635623 | 0.509060956 | 0.5192034 | 38 | 3 | FALSE | ABCG2   |
| 1.977346278 | 0.004031265 | 0.505728314 | 0.3997155 | 38 | 3 | FALSE | OPRM1   |
| 1.925566343 | 0.002227707 | 0.519327731 | 0.5078236 | 38 | 3 | FALSE | NQO1    |
| 1.974110032 | 0.001049911 | 0.506557377 | 0.5874822 | 38 | 4 | FALSE | GFAP    |
| 1.98381877  | 5.31E-04    | 0.504078303 | 0.6216216 | 37 | 3 | FALSE | PRKCZ   |
| 1.964401294 | 0.00251013  | 0.509060956 | 0.3857143 | 36 | 3 | FALSE | NR1H4   |
| 1.977346278 | 4.66E-04    | 0.505728314 | 0.6809524 | 36 | 4 | FALSE | ESR2    |
| 1.964401294 | 0.003605759 | 0.509060956 | 0.4269841 | 36 | 3 | FALSE | FASN    |
| 1.957928803 | 0.004633545 | 0.510743802 | 0.3555556 | 36 | 3 | FALSE | ACHE    |
| 2.097087379 | 3.07E-04    | 0.476851852 | 0.7412698 | 36 | 4 | FALSE | CHEK1   |
| 1.987055016 | 0.003872153 | 0.503257329 | 0.3777778 | 36 | 3 | FALSE | RXRA    |
| 2.009708738 | 0.002221285 | 0.497584541 | 0.3932773 | 35 | 4 | FALSE | CYP1A1  |
| 2.145631068 | 5.15E-04    | 0.466063348 | 0.692437  | 35 | 4 | FALSE | CXCL11  |
| 2.003236246 | 0.003149685 | 0.499192246 | 0.4352941 | 35 | 4 | FALSE | CTSD    |
| 2.097087379 | 2.74E-04    | 0.476851852 | 0.7462185 | 35 | 4 | FALSE | CDK6    |
| 1.977346278 | 0.002836838 | 0.505728314 | 0.4456328 | 34 | 3 | FALSE | DPP4    |
| 2.048543689 | 5.31E-04    | 0.488151659 | 0.6096257 | 34 | 4 | FALSE | RAC1    |
| 2           | 0.001059499 | 0.5         | 0.4777184 | 34 | 3 | FALSE | NCOA2   |
| 1.948220065 | 0.001648083 | 0.513289037 | 0.6399287 | 34 | 3 | FALSE | MIF     |
| 2.009708738 | 2.82E-04    | 0.497584541 | 0.6755793 | 34 | 3 | FALSE | CHUK    |
| 2           | 0.001296327 | 0.5         | 0.6648841 | 34 | 4 | FALSE | ALOX5   |
| 2.197411003 | 0.005931791 | 0.455081001 | 0.2916667 | 33 | 4 | FALSE | TPI1    |
| 2.003236246 | 6.45E-04    | 0.499192246 | 0.6231061 | 33 | 3 | FALSE | CYP19A1 |
| 1.996763754 | 0.002724389 | 0.500810373 | 0.5890152 | 33 | 3 | FALSE | PLA2G1B |
| 2.012944984 | 0.001636214 | 0.496784566 | 0.4274194 | 32 | 3 | FALSE | ADRB2   |
| 2.064724919 | 3.75E-04    | 0.484326019 | 0.7157258 | 32 | 4 | FALSE | CCND2   |
| 2.132686084 | 8.92E-04    | 0.468892261 | 0.5866935 | 32 | 4 | FALSE | TOP2A   |
| 2.132686084 | 2.96E-04    | 0.468892261 | 0.7182796 | 31 | 4 | FALSE | E2F1    |
| 2.106796117 | 0.001526104 | 0.474654378 | 0.3913978 | 31 | 4 | FALSE | ADRA2A  |
| 2.216828479 | 0.003736821 | 0.451094891 | 0.3204301 | 31 | 4 | FALSE | LDHB    |
| 2.003236246 | 4.41E-04    | 0.499192246 | 0.6537634 | 31 | 4 | FALSE | PTPN1   |
| 2.042071197 | 9.59E-04    | 0.489698891 | 0.6430108 | 31 | 4 | FALSE | MMP8    |
| 2.161812298 | 1.84E-04    | 0.46257485  | 0.7892473 | 31 | 4 | FALSE | CHEK2   |
| 2.165048544 | 3.13E-04    | 0.461883408 | 0.7655914 | 31 | 4 | FALSE | THBD    |
| 2.132686084 | 0.004242496 | 0.468892261 | 0.2896552 | 30 | 4 | FALSE | TXNRD1  |
| 2.077669903 | 3.34E-04    | 0.481308411 | 0.6229885 | 30 | 4 | FALSE | BCL2    |
| 2.155339806 | 1.70E-04    | 0.463963964 | 0.7980296 | 29 | 4 | FALSE | BIRC5   |
| 2.074433657 | 3.42E-04    | 0.482059282 | 0.7536946 | 29 | 3 | FALSE | PLAT    |
| 1.996763754 | 0.001109171 | 0.500810373 | 0.5026455 | 28 | 3 | FALSE | UCP2    |
| 1.996763754 | 0.002820624 | 0.500810373 | 0.3994709 | 28 | 4 | FALSE | HK2     |
| 2.077669903 | 9.50E-04    | 0.481308411 | 0.4656085 | 28 | 4 | FALSE | FABP1   |
| 2.019417476 | 4.90E-04    | 0.495192308 | 0.5820106 | 28 | 4 | FALSE | BACE1   |
| 2.061488673 | 7.14E-04    | 0.485086342 | 0.462963  | 28 | 4 | FALSE | PRKCE   |
| 2.177993528 | 0.002066558 | 0.459138187 | 0.4045584 | 27 | 4 | FALSE | ME1     |
| 2.087378641 | 9.74E-04    | 0.479069767 | 0.3960114 | 27 | 4 | FALSE | CD36    |
| 2.03236246  | 0.010390073 | 0.492038217 | 0.2051282 | 27 | 4 | FALSE | MGAM    |
| 2.122977346 | 9.57E-04    | 0.471036585 | 0.3988604 | 27 | 4 | FALSE | ADRA2B  |
| 1.996763754 | 0.004000149 | 0.500810373 | 0.4558405 | 27 | 4 | FALSE | ODC1    |
| 2.045307443 | 8.07E-04    | 0.488924051 | 0.5185185 | 27 | 4 | FALSE | LRP1    |

|             |             |             |           |    |   |       |        |
|-------------|-------------|-------------|-----------|----|---|-------|--------|
| 2.012944984 | 5.38E-04    | 0.496784566 | 0.8262108 | 27 | 3 | FALSE | ERBB3  |
| 2.129449838 | 8.14E-04    | 0.469604863 | 0.5099715 | 27 | 4 | FALSE | PTPN6  |
| 2.174757282 | 0.002969601 | 0.459821429 | 0.4102564 | 27 | 4 | FALSE | FH     |
| 2.1197411   | 0.002036609 | 0.471755725 | 0.3969231 | 26 | 3 | FALSE | CCK    |
| 2.171521036 | 9.80E-04    | 0.460506706 | 0.3876923 | 26 | 4 | FALSE | PRKCG  |
| 2.226537217 | 3.17E-04    | 0.449127907 | 0.6923077 | 26 | 4 | FALSE | C5AR1  |
| 2.100323625 | 0.002272152 | 0.476117103 | 0.3938462 | 26 | 4 | FALSE | GOT1   |
| 2.093851133 | 0.003017452 | 0.477588872 | 0.4553846 | 26 | 4 | FALSE | IDH2   |
| 2.223300971 | 7.25E-04    | 0.449781659 | 0.6615385 | 26 | 4 | FALSE | PCNA   |
| 2.058252427 | 0.003017597 | 0.485849057 | 0.45      | 25 | 3 | FALSE | HMGCR  |
| 2           | 0.00661129  | 0.5         | 0.3066667 | 25 | 4 | FALSE | AKR1B1 |
| 2.1197411   | 2.70E-04    | 0.471755725 | 0.6533333 | 25 | 4 | FALSE | OLR1   |
| 2.071197411 | 0.001534784 | 0.4828125   | 0.4333333 | 25 | 4 | FALSE | MME    |
| 2.1197411   | 9.28E-04    | 0.471755725 | 0.7137681 | 24 | 4 | FALSE | TOP1   |
| 2.042071197 | 0.002523851 | 0.489698891 | 0.2898551 | 24 | 3 | FALSE | BCHE   |
| 2.462783172 | 0.001609107 | 0.406044678 | 0.4818841 | 24 | 4 | FALSE | GLUD1  |
| 2.113268608 | 1.72E-04    | 0.473200613 | 0.6884058 | 24 | 4 | FALSE | ATF2   |
| 2.148867314 | 0.001987467 | 0.465361446 | 0.3985507 | 24 | 4 | FALSE | GRIN2A |
| 2.045307443 | 0.002035498 | 0.488924051 | 0.3952569 | 23 | 4 | FALSE | SLC2A2 |
| 2.064724919 | 0.001055277 | 0.484326019 | 0.4466403 | 23 | 3 | FALSE | NR1I2  |
| 2.074433657 | 0.002315355 | 0.482059282 | 0.4782609 | 23 | 4 | FALSE | ACACA  |
| 2.077669903 | 0.002032129 | 0.481308411 | 0.5573123 | 23 | 3 | FALSE | SCD    |
| 2.122977346 | 6.83E-04    | 0.471036585 | 0.4664032 | 23 | 4 | FALSE | PON1   |
| 2.174757282 | 0.001492134 | 0.459821429 | 0.4347826 | 23 | 4 | FALSE | SLC6A4 |
| 2.139158576 | 0.001800497 | 0.467473525 | 0.4110672 | 23 | 4 | FALSE | HTR2A  |
| 2.165048544 | 8.06E-04    | 0.461883408 | 0.5059289 | 23 | 4 | FALSE | PTGS1  |
| 2.148867314 | 3.81E-04    | 0.465361446 | 0.5238095 | 22 | 4 | FALSE | CYP1B1 |
| 2.029126214 | 0.001841501 | 0.492822967 | 0.3463203 | 22 | 4 | FALSE | TYR    |
| 2.275080906 | 0.001884844 | 0.439544808 | 0.3506494 | 22 | 4 | FALSE | MAOA   |
| 2.087378641 | 3.59E-04    | 0.479069767 | 0.4675325 | 22 | 3 | FALSE | INSR   |
| 2.122977346 | 0.005498479 | 0.471036585 | 0.2121212 | 22 | 4 | FALSE | TAT    |
| 2.537216828 | 0.003821912 | 0.394132653 | 0.4047619 | 21 | 4 | FALSE | PDHB   |
| 2.142394822 | 0.001898602 | 0.466767372 | 0.4666667 | 21 | 3 | FALSE | PYY    |
| 2.029126214 | 0.00414895  | 0.492822967 | 0.3857143 | 21 | 4 | FALSE | GLS2   |
| 2.223300971 | 6.61E-05    | 0.449781659 | 0.8095238 | 21 | 4 | FALSE | CDC25B |
| 2.15210356  | 9.92E-04    | 0.464661654 | 0.5368421 | 20 | 4 | FALSE | SLC6A3 |
| 2.171521036 | 6.62E-04    | 0.460506706 | 0.4947368 | 20 | 4 | FALSE | ADRA1D |
| 2.433656958 | 0.001386823 | 0.410904255 | 0.4263158 | 20 | 3 | FALSE | SDHA   |
| 2.15210356  | 4.79E-04    | 0.464661654 | 0.4947368 | 20 | 4 | FALSE | MAP2   |
| 2.145631068 | 4.36E-04    | 0.466063348 | 0.5368421 | 20 | 4 | FALSE | PTGER3 |
| 2.213592233 | 1.05E-04    | 0.451754386 | 0.7473684 | 20 | 4 | FALSE | BAX    |
| 2.190938511 | 5.48E-05    | 0.456425406 | 0.8736842 | 20 | 4 | FALSE | E2F2   |
| 2.155339806 | 6.90E-04    | 0.463963964 | 0.5263158 | 19 | 4 | FALSE | DRD1   |
| 2.058252427 | 0.001081385 | 0.485849057 | 0.5555556 | 19 | 4 | FALSE | ACTA2  |
| 2.245954693 | 8.18E-04    | 0.445244957 | 0.3625731 | 19 | 4 | FALSE | TBXA2R |
| 2.300970874 | 0.001384176 | 0.434599156 | 0.3450292 | 19 | 4 | FALSE | OAT    |
| 2.203883495 | 3.68E-05    | 0.453744493 | 0.7953216 | 19 | 4 | FALSE | RASSF1 |
| 2.200647249 | 0.003579543 | 0.454411765 | 0.2865497 | 19 | 4 | FALSE | CTH    |
| 2.177993528 | 9.72E-05    | 0.459138187 | 0.8479532 | 19 | 4 | FALSE | MMP12  |
| 2.210355987 | 6.12E-04    | 0.452415813 | 0.5847953 | 19 | 4 | FALSE | SLPI   |
| 2.190938511 | 0.001076155 | 0.456425406 | 0.3594771 | 18 | 4 | FALSE | CHRM1  |
| 2.139158576 | 2.58E-04    | 0.467473525 | 0.5751634 | 18 | 4 | FALSE | ADRB1  |
| 2.275080906 | 0.001827812 | 0.439544808 | 0.3267974 | 18 | 3 | FALSE | ALDH2  |
| 2.28802589  | 5.61E-04    | 0.437057992 | 0.4509804 | 18 | 4 | FALSE | GRIA2  |
| 2.372168285 | 0.006447928 | 0.421555252 | 0.2279412 | 17 | 4 | FALSE | AGXT   |
| 2.161812298 | 5.14E-04    | 0.46257485  | 0.4264706 | 17 | 4 | FALSE | GSTM1  |
| 2.300970874 | 0.006652805 | 0.434599156 | 0.5294118 | 17 | 4 | FALSE | COL3A1 |
| 2.300970874 | 0.001010985 | 0.434599156 | 0.4264706 | 17 | 4 | FALSE | CHRM2  |

|             |             |             |           |    |   |       |         |
|-------------|-------------|-------------|-----------|----|---|-------|---------|
| 2.355987055 | 0.002363557 | 0.424450549 | 0.3088235 | 17 | 4 | FALSE | OTC     |
| 2.13592233  | 8.13E-04    | 0.468181818 | 0.4191176 | 17 | 4 | FALSE | PPARD   |
| 2.27184466  | 0.001109883 | 0.44017094  | 0.425     | 16 | 4 | FALSE | MAOB    |
| 2.200647249 | 0.002712533 | 0.454411765 | 0.15      | 16 | 3 | FALSE | GUSB    |
| 2.132686084 | 3.25E-04    | 0.468892261 | 0.6083333 | 16 | 4 | FALSE | UCP3    |
| 2.110032362 | 5.99E-04    | 0.47392638  | 0.5166667 | 16 | 3 | FALSE | AKR1C3  |
| 2.145631068 | 5.13E-05    | 0.466063348 | 0.7416667 | 16 | 4 | FALSE | HSF1    |
| 2.090614887 | 4.99E-06    | 0.478328173 | 0.95      | 16 | 4 | FALSE | FLT4    |
| 2.236245955 | 8.09E-04    | 0.447178003 | 0.2571429 | 15 | 4 | FALSE | ABCC2   |
| 2.181229773 | 0.001027083 | 0.458456973 | 0.4761905 | 15 | 3 | FALSE | F7      |
| 2.216828479 | 1.10E-04    | 0.451094891 | 0.6190476 | 15 | 4 | FALSE | GAP43   |
| 2.223300971 | 0.001559245 | 0.449781659 | 0.3238095 | 15 | 4 | FALSE | ALDH1B1 |
| 2.110032362 | 7.20E-05    | 0.47392638  | 0.6285714 | 15 | 3 | FALSE | NR3C2   |
| 2.236245955 | 0.001400216 | 0.447178003 | 0.5142857 | 15 | 4 | FALSE | ME2     |
| 2.249190939 | 1.69E-04    | 0.444604317 | 0.4857143 | 15 | 4 | FALSE | PSMD3   |
| 2.100323625 | 1.82E-04    | 0.476117103 | 0.5333333 | 15 | 3 | FALSE | GSTM2   |
| 2.618122977 | 7.83E-04    | 0.381953028 | 0.4835165 | 14 | 4 | FALSE | ALDH4A1 |
| 2.323624595 | 1.98E-04    | 0.430362117 | 0.7032967 | 14 | 4 | FALSE | TK1     |
| 2.352750809 | 1.96E-04    | 0.425034388 | 0.7820513 | 13 | 4 | FALSE | DEFB4A  |
| 2.336569579 | 1.07E-04    | 0.427977839 | 0.530303  | 12 | 4 | FALSE | NR1I3   |
| 2.57605178  | 1.18E-04    | 0.388190955 | 0.6969697 | 12 | 4 | FALSE | ME3     |
| 2.404530744 | 5.15E-04    | 0.415881561 | 0.3181818 | 12 | 4 | FALSE | LTA4H   |
| 2.25566343  | 3.40E-04    | 0.443328551 | 0.6060606 | 12 | 4 | FALSE | LCAT    |
| 2.242718447 | 0.00110536  | 0.445887446 | 0.4       | 11 | 4 | FALSE | AOC3    |
| 2.498381877 | 9.20E-05    | 0.400259067 | 0.6363636 | 11 | 4 | FALSE | F10     |
| 2.372168285 | 3.03E-04    | 0.421555252 | 0.4545455 | 11 | 3 | FALSE | F13A1   |
| 2.207119741 | 7.13E-04    | 0.453079179 | 0.6444444 | 10 | 4 | FALSE | ABI1    |
| 2.233009709 | 2.05E-04    | 0.447826087 | 0.5555556 | 10 | 4 | FALSE | TF      |
| 2.220064725 | 9.57E-04    | 0.450437318 | 0.4       | 10 | 4 | FALSE | AHSA1   |
| 2.275080906 | 5.65E-06    | 0.439544808 | 0.9111111 | 10 | 4 | FALSE | BAK1    |
| 2.71197411  | 1.20E-04    | 0.368735084 | 0.6       | 10 | 5 | FALSE | ALDH5A1 |
| 2.307443366 | 2.45E-05    | 0.433380084 | 0.7777778 | 10 | 4 | FALSE | CETP    |
| 2.433656958 | 1.41E-04    | 0.410904255 | 0.5333333 | 10 | 4 | FALSE | LTF     |
| 2.281553398 | 2.85E-04    | 0.438297872 | 0.5       | 9  | 4 | FALSE | XDH     |
| 2.508090615 | 0.001043461 | 0.398709677 | 0.2777778 | 9  | 4 | FALSE | BHMT    |
| 2.563106796 | 4.10E-04    | 0.390151515 | 0.4444444 | 9  | 4 | FALSE | GLRA2   |
| 2.517799353 | 1.85E-04    | 0.397172237 | 0.8055556 | 9  | 4 | FALSE | CHRM3   |
| 2.346278317 | 4.46E-04    | 0.426206897 | 0.3333333 | 9  | 4 | FALSE | GLB1    |
| 2.453074434 | 3.89E-04    | 0.407651715 | 0.4166667 | 9  | 4 | FALSE | GRIK2   |
| 2.595469256 | 0.001092257 | 0.385286783 | 0.1944444 | 9  | 4 | FALSE | CHDH    |
| 2.433656958 | 6.40E-04    | 0.410904255 | 0.3333333 | 9  | 4 | FALSE | PYGM    |
| 2.378640777 | 1.39E-05    | 0.420408163 | 0.6944444 | 9  | 4 | FALSE | ELK1    |
| 2.605177994 | 0.002642507 | 0.383850932 | 0.25      | 8  | 4 | FALSE | GNMT    |
| 2.59223301  | 6.00E-04    | 0.38576779  | 0.1785714 | 8  | 4 | FALSE | KYNU    |
| 2.783171521 | 1.13E-04    | 0.359302326 | 0.3571429 | 8  | 4 | FALSE | CHRNA7  |
| 2.265372168 | 2.27E-04    | 0.441428571 | 0.6785714 | 8  | 4 | FALSE | BCAT2   |
| 2.469255663 | 2.23E-06    | 0.404980341 | 0.8928571 | 8  | 4 | FALSE | FCER2   |
| 2.378640777 | 3.22E-04    | 0.420408163 | 0.5714286 | 8  | 4 | FALSE | NDUFS1  |
| 2.521035599 | 2.75E-04    | 0.396662388 | 0.2142857 | 8  | 4 | FALSE | ENPEP   |
| 2.249190939 | 7.23E-05    | 0.444604317 | 0.5357143 | 8  | 4 | FALSE | TPO     |
| 2.747572816 | 1.87E-04    | 0.363957597 | 0.2857143 | 7  | 4 | FALSE | ALDH9A1 |
| 2.28802589  | 3.05E-05    | 0.437057992 | 0.6190476 | 7  | 4 | FALSE | PRSS1   |
| 2.414239482 | 2.50E-05    | 0.414209115 | 0.7619048 | 7  | 4 | FALSE | HAS2    |
| 2.265372168 | 1.22E-05    | 0.441428571 | 0.6666667 | 7  | 4 | FALSE | TYRP1   |
| 2.766990291 | 2.18E-04    | 0.361403509 | 0.2666667 | 6  | 4 | FALSE | ACAT2   |
| 2.72815534  | 3.01E-04    | 0.366548043 | 0.0666667 | 6  | 4 | FALSE | GALE    |
| 2.414239482 | 3.94E-05    | 0.414209115 | 0.3333333 | 6  | 4 | FALSE | RBP2    |
| 2.388349515 | 2.03E-04    | 0.418699187 | 0.3333333 | 6  | 4 | FALSE | PLA2G2E |

|             |             |             |           |   |   |       |          |
|-------------|-------------|-------------|-----------|---|---|-------|----------|
| 2.899676375 | 9.49E-05    | 0.344866071 | 0.6666667 | 6 | 5 | FALSE | MTR      |
| 2.411003236 | 1.37E-04    | 0.414765101 | 0.4666667 | 6 | 4 | FALSE | KCNH2    |
| 2.278317152 | 9.20E-06    | 0.438920455 | 0.8       | 6 | 4 | FALSE | PDX1     |
| 2.336569579 | 5.43E-04    | 0.427977839 | 0.2666667 | 6 | 4 | FALSE | NPEPPS   |
| 2.262135922 | 8.01E-05    | 0.442060086 | 0.4       | 5 | 3 | FALSE | CA2      |
| 2.644012945 | 7.99E-05    | 0.378212974 | 0.3       | 5 | 4 | FALSE | SCN5A    |
| 2.372168285 | 0.003908396 | 0.421555252 | 0.6       | 5 | 4 | FALSE | SOAT1    |
| 2.42394822  | 2.79E-05    | 0.412550067 | 0.5       | 4 | 4 | FALSE | ATP2C1   |
| 2.411003236 | 1.16E-05    | 0.414765101 | 0.6666667 | 4 | 4 | FALSE | SMPD2    |
| 2.517799353 | 1.02E-04    | 0.397172237 | 0.5       | 4 | 4 | FALSE | CLDN4    |
| 2.44012945  | 0           | 0.409814324 | 1         | 4 | 4 | FALSE | LITAF    |
| 2.472491909 | 1.30E-05    | 0.404450262 | 0.5       | 4 | 4 | FALSE | IVL      |
| 2.44012945  | 2.48E-05    | 0.409814324 | 0.1666667 | 4 | 4 | FALSE | PAM      |
| 2.757281553 | 6.88E-06    | 0.362676056 | 0.6666667 | 3 | 4 | FALSE | SLC25A13 |
| 2.734627832 | 3.81E-04    | 0.365680473 | 0.6666667 | 3 | 4 | FALSE | PCOLCE   |
| 2.786407767 | 0           | 0.358885017 | 1         | 3 | 4 | FALSE | SLC16A7  |
| 3.216828479 | 0           | 0.310865191 | 1         | 2 | 5 | FALSE | GCAT     |
| 2.401294498 | 0           | 0.416442049 | 1         | 2 | 4 | FALSE | NQO2     |
| 3.294498382 | 0           | 0.303536346 | 1         | 2 | 5 | FALSE | PLOD1    |
| 2.708737864 | 3.06E-05    | 0.369175627 | 0         | 2 | 4 | FALSE | EIF6     |
| 3.158576052 | 6.40E-05    | 0.316598361 | 0         | 2 | 5 | FALSE | SLC25A10 |
| 3.029126214 | 0           | 0.330128205 | 0         | 1 | 5 | FALSE | CA1      |
| 2.498381877 | 0           | 0.400259067 | 0         | 1 | 4 | FALSE | ISYNA1   |
