# Supplementary material for: The Study of Yin-Chen-Hao-Tang Preventing and Treating Alcoholic Fatty Liver Disease through PPAR Signaling Pathway Based on Network Pharmacology and RNA-Seq Transcriptomics
Source: Hindawi journal article supplement (doi:10.1155/2021/8917993), 2021-12-31
Supplement: f1 [file 8917993.f1.zip]

| Mol ID    | Molecule Name | Target Name                                                  | drugbank | Status    |
|-----------|---------------|--------------------------------------------------------------|----------|-----------|
| MOL001406 | crocetin      | Cytochrome P450-cam                                          | 2298     | validated |
| MOL001406 | crocetin      | Muscarinic acetylcholine<br>receptor M3                      | 51       |           |
| MOL001406 | crocetin      | Muscarinic acetylcholine<br>receptor M1                      | 103      |           |
| MOL001406 | crocetin      | Gamma-aminobutyric-acid<br>receptor subunit alpha-2          | 423      |           |
| MOL001406 | crocetin      | Gamma-aminobutyric-acid<br>receptor subunit alpha-5          | 523      |           |
| MOL001406 | crocetin      | Alpha-1A adrenergic receptor<br>Gamma-aminobutyric-acid      | 556      |           |
| MOL001406 | crocetin      | receptor subunit alpha-3<br>Muscarinic acetylcholine         | 580      |           |
| MOL001406 | crocetin      | receptor M2                                                  | 617      |           |
| MOL001406 | crocetin      | Alpha-1B adrenergic receptor<br>Gamma-aminobutyric-acid      | 632      |           |
| MOL001406 | crocetin      | receptor subunit alpha-1                                     | 872      |           |
| MOL001406 | crocetin      | Ig gamma-1 chain C region                                    | 4785     |           |
| MOL001406 | crocetin      | Prostaglandin G/H synthase 2<br>Nuclear receptor coactivator | 290      |           |
| MOL001406 | crocetin      | 2                                                            | 6241     |           |
| MOL001406 | crocetin      | Vascular cell adhesion<br>protein 1                          | 1908     |           |
| MOL001648 | genipin       | Prostaglandin G/H synthase 1                                 | 20       | validated |
| MOL001648 | genipin       | Prostaglandin G/H synthase 2                                 | 290      |           |
| MOL001648 | genipin       | Carbonic anhydrase 2<br>Gamma-aminobutyric-acid              | 357      |           |
| MOL001648 | genipin       | receptor subunit alpha-2<br>Gamma-aminobutyric-acid          | 423      |           |
| MOL001648 | genipin       | receptor subunit alpha-1                                     | 872      |           |
| MOL001648 | genipin       | Thymidine kinase                                             | 2559     |           |
| MOL001648 | genipin       | Trypsin-1                                                    | 3176     |           |
| MOL001648 | genipin       | Glutamate receptor 2<br>Gamma-aminobutyric-acid              | 921      |           |
| MOL001648 | genipin       | receptor subunit alpha-6<br>Canalicular multispecific        | 841      |           |
| MOL001648 | genipin       | organic anion transporter 1                                  | h001     |           |
| MOL001941 | Ammidin       | Prothrombin                                                  | 54       |           |
| MOL001941 | Ammidin       | Muscarinic acetylcholine<br>receptor M1                      | 103      |           |
| MOL001941 | Ammidin       | Prostaglandin G/H synthase 2<br>Gamma-aminobutyric-acid      | 290      |           |
| MOL001941 | Ammidin       | receptor subunit alpha-1                                     | 872      |           |
| MOL001941 | Ammidin       | Dipeptidyl peptidase 4                                       | 952      |           |

|           |            |                                                                                |      |           |
|-----------|------------|--------------------------------------------------------------------------------|------|-----------|
|           |            | Phosphatidylinositol-4,5-bisphosphate 3-kinase catalytic subunit gamma isoform | 2404 |           |
| MOL001941 | Ammidin    | cAMP-dependent protein kinase catalytic subunit alpha                          | 6263 |           |
| MOL001941 | Ammidin    | Amine oxidase [flavin-containing] B                                            | 3939 |           |
| MOL000437 | Hirsutrin  | DNA topoisomerase 2-alpha                                                      | 817  |           |
|           |            | Tyrosine-protein phosphatase non-receptor type 1                               | 687  |           |
| MOL000437 | Hirsutrin  | Coagulation factor X                                                           | 239  |           |
|           |            | Sphingomyelin phosphodiesterase 2                                              | h001 | validated |
| MOL004556 | crocin     | Carbonic anhydrase 2                                                           | 357  |           |
| MOL004557 | geniposide | Apoptosis regulator Bcl-2                                                      | 273  | validated |
| MOL004557 | geniposide | Heme oxygenase 1                                                               | 3391 | validated |
| MOL004557 | geniposide | Neuromodulin                                                                   | h001 | validated |
|           |            | Phospholipase B1, membrane-associated                                          | h001 | validated |
| MOL004557 | geniposide | Glucagon                                                                       | h001 | validated |
|           |            | Glutathione S-transferase Mu 1                                                 | 896  | validated |
| MOL004557 | geniposide | Glutathione S-transferase Mu 2                                                 | 2165 | validated |
| MOL000415 | rutin      | DNA topoisomerase 2-alpha                                                      | 817  |           |
| MOL000415 | rutin      | Transcription factor p65                                                       | h001 | validated |
| MOL000415 | rutin      | Tumor necrosis factor                                                          | 777  | validated |
| MOL000415 | rutin      | Interleukin-6                                                                  | 1159 | validated |
| MOL000415 | rutin      | Caspase-3                                                                      | h001 | validated |
| MOL000415 | rutin      |                                                                                |      | validated |
|           |            | Superoxide dismutase [Cu-Zn]                                                   | 4152 | validated |
| MOL000415 | rutin      | Interleukin-1 beta                                                             | 1654 | validated |
| MOL000415 | rutin      | Interleukin-8                                                                  | h001 | validated |
| MOL000415 | rutin      | Protein kinase C beta type                                                     | h001 | validated |
| MOL000415 | rutin      | Arachidonate 5-lipoxygenase                                                    | 275  | validated |
|           |            | 3-hydroxy-3-methylglutaryl-coenzyme A reductase                                | 3387 | validated |
| MOL000415 | rutin      | Hyaluronan synthase 2                                                          | h001 | validated |
|           |            | Type I iodothyronine deiodinase                                                | h001 | validated |
|           |            | C5a anaphylatoxin chemotactic receptor                                         | h001 | validated |
| MOL000415 | rutin      | Insulin                                                                        | 5961 | validated |
|           |            | Low affinity immunoglobulin epsilon Fc receptor                                | h001 | validated |
| MOL000415 | rutin      | Integrin beta-2                                                                | 1630 | validated |
| MOL000415 | rutin      | Thromboxane A2 receptor                                                        | 835  | validated |

|           |                                                                                                                                                                                          |                                                       |      |           |
|-----------|------------------------------------------------------------------------------------------------------------------------------------------------------------------------------------------|-------------------------------------------------------|------|-----------|
|           | (1S, 4aS, 5R, 7S, 7aS)-5, 7-dihydroxy-7-methyl-1-[(2S, 3R, 4S, 5S, 6R)-3, 4, 5-trihydroxy-6-(hydroxymethyl)oxan-2-yl]oxy-4a, 5, 6, 7a-tetrahydro-1H-cyclopenta[d]pyran-4-carboxylic acid | Carbonic anhydrase 2                                  | 357  |           |
| MOL004559 | (1S, 4aS, 5R, 7S, 7aS)-5, 7-dihydroxy-7-methyl-1-[(2S, 3R, 4S, 5S, 6R)-3, 4, 5-trihydroxy-6-(hydroxymethyl)oxan-2-yl]oxy-4a, 5, 6, 7a-tetrahydro-1H-cyclopenta[d]pyran-4-carboxylic acid | Dipeptidyl peptidase 4                                | 952  |           |
| MOL004559 | SHANZHISIDE_qt                                                                                                                                                                           | Trypsin-1                                             | 3176 |           |
| MOL004560 | SHANZHISIDE_qt                                                                                                                                                                           | Glutamate receptor 2                                  | 921  |           |
| MOL004561 | Sudan III                                                                                                                                                                                | Prothrombin                                           | 54   |           |
| MOL004561 | Sudan III                                                                                                                                                                                | Estrogen receptor                                     | 136  |           |
| MOL004561 | Sudan III                                                                                                                                                                                | Prostaglandin G/H synthase 2                          | 290  |           |
| MOL004561 | Sudan III                                                                                                                                                                                | Coagulation factor VII                                | 369  |           |
| MOL004561 | Sudan III                                                                                                                                                                                | Estrogen receptor beta                                | 869  |           |
| MOL004561 | Sudan III                                                                                                                                                                                | Dipeptidyl peptidase 4                                | 952  |           |
| MOL004561 | Sudan III                                                                                                                                                                                | Mitogen-activated protein kinase 14                   | 1540 |           |
| MOL004561 | Sudan III                                                                                                                                                                                | Glycogen synthase kinase-3 beta                       | 1721 |           |
| MOL004561 | Sudan III                                                                                                                                                                                | Mitogen-activated protein kinase 10                   | 1836 |           |
| MOL004561 | Sudan III                                                                                                                                                                                | Cell division protein kinase 2                        | 2240 |           |
| MOL004561 | Sudan III                                                                                                                                                                                | cAMP-dependent protein kinase catalytic subunit alpha | 6263 |           |
| MOL004561 | Sudan III                                                                                                                                                                                | Proto-oncogene serine/threonine-protein kinase Pim-1  | 2347 |           |
| MOL004561 | Sudan III                                                                                                                                                                                | Cyclin-A2                                             | 6235 |           |
| MOL000511 | ursolic acid                                                                                                                                                                             | Urokinase-type plasminogen activator                  | 1074 | validated |
| MOL000511 | ursolic acid                                                                                                                                                                             | Cathepsin B                                           | 1233 | validated |
| MOL000511 | ursolic acid                                                                                                                                                                             | Transcription factor p65                              | h001 | validated |
| MOL000511 | ursolic acid                                                                                                                                                                             | Signal transducer and activator of transcription 3    | h001 | validated |
| MOL000511 | ursolic acid                                                                                                                                                                             |                                                       |      | validated |
| MOL000511 | ursolic acid                                                                                                                                                                             | G1/S-specific cyclin-D1                               | h001 | validated |
| MOL000511 | ursolic acid                                                                                                                                                                             | Apoptosis regulator Bcl-2                             | 273  | validated |
| MOL000511 | ursolic acid                                                                                                                                                                             | Bcl-2-like protein 1                                  | h001 | validated |

|           |              |                                                                   |      |           |
|-----------|--------------|-------------------------------------------------------------------|------|-----------|
| MOL000511 | ursolic acid | Proto-oncogene c-Fos<br>Cyclin-dependent kinase                   | h001 | validated |
| MOL000511 | ursolic acid | inhibitor 1                                                       | h001 | validated |
| MOL000511 | ursolic acid | Apoptosis regulator BAX                                           | h001 | validated |
| MOL000511 | ursolic acid | Caspase-9                                                         | h001 | validated |
| MOL000511 | ursolic acid | 72 kDa type IV collagenase                                        | 707  | validated |
| MOL000511 | ursolic acid | Matrix metalloproteinase-9                                        | h001 | validated |
| MOL000511 | ursolic acid | Cell division protein kinase<br>4                                 | 3959 | validated |
| MOL000511 | ursolic acid | Tumor necrosis factor                                             | 777  | validated |
| MOL000511 | ursolic acid | Transcription factor AP-1                                         | 1629 | validated |
| MOL000511 | ursolic acid | Interleukin-6                                                     | 1159 | validated |
| MOL000511 | ursolic acid | Cell division protein kinase<br>6                                 | 3955 | validated |
| MOL000511 | ursolic acid | Caspase-3                                                         | h001 | validated |
| MOL000511 | ursolic acid | Cellular tumor antigen p53                                        | 5788 | validated |
| MOL000511 | ursolic acid | Mitogen-activated protein<br>kinase 8                             | 6292 | validated |
| MOL000511 | ursolic acid | Prostaglandin G/H synthase 2                                      | 290  | validated |
| MOL000511 | ursolic acid | NF-kappa-B inhibitor alpha                                        | h001 | validated |
| MOL000511 | ursolic acid | Caspase-8                                                         | h001 | validated |
| MOL000511 | ursolic acid | Fatty acid synthase                                               | 1295 | validated |
| MOL000511 | ursolic acid | Interstitial collagenase                                          | 1167 | validated |
| MOL000511 | ursolic acid | Stromelysin-1                                                     | 1926 | validated |
| MOL000511 | ursolic acid | Probable E3 ubiquitin-<br>protein ligase HERC5                    | h001 | validated |
| MOL000511 | ursolic acid | Heparin-binding growth<br>factor 2                                | 1525 | validated |
| MOL000511 | ursolic acid | Intercellular adhesion<br>molecule 1                              | h001 | validated |
| MOL000511 | ursolic acid | Interleukin-1 beta                                                | 1654 | validated |
| MOL000511 | ursolic acid | Cyclic AMP-responsive<br>element-binding protein 1                | h001 | validated |
| MOL000511 | ursolic acid | E-selectin                                                        | 1756 | validated |
| MOL000511 | ursolic acid | Prostaglandin E2 receptor,<br>EP3 subtype                         | 4131 | validated |
| MOL000511 | ursolic acid | Prostaglandin G/H synthase 1                                      | 20   | validated |
| MOL000511 | ursolic acid | Induced myeloid leukemia<br>cell differentiation protein<br>Mcl-1 | h001 | validated |
| MOL000511 | ursolic acid | Protein kinase C gamma type                                       | h001 | validated |
| MOL000511 | ursolic acid | Cyclic AMP-dependent<br>transcription factor ATF-2                | h001 | validated |
| MOL000511 | ursolic acid | Granulocyte-macrophage<br>colony-stimulating factor               | h001 | validated |
| MOL000511 | ursolic acid | Platelet endothelial cell<br>adhesion molecule                    | h001 | validated |
| MOL000511 | ursolic acid | C-Jun-amino-terminal kinase-<br>interacting protein 2             | h001 | validated |

|           |              |                                                                                |      |           |
|-----------|--------------|--------------------------------------------------------------------------------|------|-----------|
| MOL000511 | ursolic acid | Baculoviral IAP repeat-containing protein 5                                    | h001 | validated |
| MOL000511 | ursolic acid | Tyrosine-protein phosphatase non-receptor type 6                               | h001 | validated |
| MOL000511 | ursolic acid | Neuromodulin                                                                   | h001 | validated |
| MOL000511 | ursolic acid | Dual oxidase 2                                                                 | h001 | validated |
| MOL000511 | ursolic acid | Nitric oxide synthase, endothelial                                             | h001 | validated |
| MOL000511 | ursolic acid | Tyrosine-protein phosphatase non-receptor type 1                               | h001 | validated |
| MOL000511 | ursolic acid | Phosphatidylinositol-3,4,5-trisphosphate 5-phosphatase 2                       | h001 | validated |
| MOL000511 | ursolic acid | Lipopolysaccharide-induced tumor necrosis factor-alpha factor                  | h001 | validated |
| MOL000511 | ursolic acid | G1/S-specific cyclin-D2                                                        | h001 | validated |
| MOL000511 | ursolic acid | Tumor necrosis factor ligand superfamily member 6                              | h001 | validated |
| MOL000511 | ursolic acid | Caspase-1                                                                      | h001 | validated |
| MOL000511 | ursolic acid | Ectonucleotide pyrophosphatase/phosphodiesterase family member 7               | h001 | validated |
| MOL000098 | quercetin    | Prostaglandin G/H synthase 1                                                   | 20   | validated |
| MOL000098 | quercetin    | Androgen receptor                                                              | 146  | validated |
| MOL000098 | quercetin    | Peroxisome proliferator-activated receptor gamma                               | 238  |           |
| MOL000098 | quercetin    | Prostaglandin G/H synthase 2                                                   | 290  | validated |
| MOL000098 | quercetin    | Heat shock protein HSP 90-alpha                                                | 1939 |           |
| MOL000098 | quercetin    | Phosphatidylinositol-4,5-bisphosphate 3-kinase catalytic subunit gamma isoform | 2404 |           |
| MOL000098 | quercetin    | Nuclear receptor coactivator 2                                                 | 6241 |           |
| MOL000098 | quercetin    | Dipeptidyl peptidase 4                                                         | 952  |           |
| MOL000098 | quercetin    | Aldose reductase                                                               | 822  |           |
| MOL000098 | quercetin    | Trypsin-1                                                                      | 3176 |           |
| MOL000098 | quercetin    | DNA topoisomerase 2-alpha                                                      | 817  |           |
| MOL000098 | quercetin    | Prothrombin                                                                    | 54   |           |
| MOL000098 | quercetin    | Potassium voltage-gated channel subfamily H member 2                           | 101  |           |
| MOL000098 | quercetin    | Sodium channel protein type 5 subunit alpha                                    | 220  |           |
| MOL000098 | quercetin    | Coagulation factor X                                                           | 239  |           |
| MOL000098 | quercetin    | Beta-2 adrenergic receptor                                                     | 766  |           |
| MOL000098 | quercetin    | Stromelysin-1                                                                  | 1926 |           |

|           |           |                                                    |      |           |
|-----------|-----------|----------------------------------------------------|------|-----------|
|           |           | cAMP-dependent protein<br>kinase catalytic subunit |      |           |
| MOL000098 | quercetin | alpha                                              | 6263 |           |
| MOL000098 | quercetin | Coagulation factor VII                             | 369  |           |
|           |           | Nitric-oxide synthase,                             |      |           |
| MOL000098 | quercetin | endothelial                                        | 291  |           |
|           |           | Retinoic acid receptor RXR-                        |      |           |
| MOL000098 | quercetin | alpha                                              | 459  |           |
| MOL000098 | quercetin | Acetylcholinesterase                               | 474  |           |
|           |           | Gamma-aminobutyric-acid                            |      |           |
| MOL000098 | quercetin | receptor subunit alpha-1                           | 872  |           |
|           |           | Amine oxidase [flavin-                             |      |           |
| MOL000098 | quercetin | containing] B                                      | 3939 |           |
| MOL000098 | quercetin | Transcription factor p65                           | h001 | validated |
|           |           | Epidermal growth factor                            |      |           |
| MOL000098 | quercetin | receptor                                           | 844  | validated |
|           |           | RAC-alpha serine/threonine-                        |      |           |
| MOL000098 | quercetin | protein kinase                                     | h001 | validated |
| MOL000098 | quercetin |                                                    |      | validated |
| MOL000098 | quercetin | G1/S-specific cyclin-D1                            | h001 | validated |
| MOL000098 | quercetin | Apoptosis regulator Bcl-2                          | 273  | validated |
| MOL000098 | quercetin | Bcl-2-like protein 1                               | h001 | validated |
| MOL000098 | quercetin | Proto-oncogene c-Fos                               | h001 | validated |
|           |           | Cyclin-dependent kinase                            |      |           |
| MOL000098 | quercetin | inhibitor 1                                        | h001 | validated |
|           |           | Eukaryotic translation                             |      |           |
| MOL000098 | quercetin | initiation factor 6                                | h001 | validated |
| MOL000098 | quercetin | Apoptosis regulator BAX                            | h001 | validated |
| MOL000098 | quercetin | Caspase-9                                          | h001 | validated |
|           |           | Urokinase-type plasminogen                         |      |           |
| MOL000098 | quercetin | activator                                          | 1074 | validated |
| MOL000098 | quercetin | 72 kDa type IV collagenase                         | 707  | validated |
| MOL000098 | quercetin | Matrix metalloproteinase-9                         | h001 | validated |
|           |           | Mitogen-activated protein                          |      |           |
| MOL000098 | quercetin | kinase 1                                           | 1176 | validated |
| MOL000098 | quercetin | Interleukin-10                                     | h001 | validated |
|           |           | Retinoblastoma-associated                          |      |           |
| MOL000098 | quercetin | protein                                            | 3846 | validated |
| MOL000098 | quercetin | Tumor necrosis factor                              | 777  | validated |
| MOL000098 | quercetin | Transcription factor AP-1                          | 1629 | validated |
| MOL000098 | quercetin | Interleukin-6                                      | 1159 | validated |
|           |           | Cyclin-dependent kinase                            |      |           |
| MOL000098 | quercetin | inhibitor 2A, isoforms 1/2/3                       | h001 | validated |
|           |           | Activator of 90 kDa heat                           |      |           |
|           |           | shock protein ATPase homolog                       |      |           |
| MOL000098 | quercetin | 1                                                  | h001 | validated |
| MOL000098 | quercetin | Caspase-3                                          | h001 | validated |
| MOL000098 | quercetin | Cellular tumor antigen p53                         | 5788 | validated |
|           |           | ETS domain-containing                              |      |           |
| MOL000098 | quercetin | protein Elk-1                                      | h001 | validated |
| MOL000098 | quercetin | NF-kappa-B inhibitor alpha                         | h001 | validated |
| MOL000098 | quercetin | Ornithine decarboxylase                            | 449  | validated |

|           |           |                              |      |           |
|-----------|-----------|------------------------------|------|-----------|
|           |           | Xanthine                     |      |           |
| MOL000098 | quercetin | dehydrogenase/oxidase        | 3947 | validated |
| MOL000098 | quercetin | Caspase-8                    | h001 | validated |
| MOL000098 | quercetin | DNA topoisomerase 1          | 3552 | validated |
|           |           | RAF proto-oncogene           |      |           |
|           |           | serine/threonine-protein     |      |           |
| MOL000098 | quercetin | kinase                       | h001 | validated |
| MOL000098 | quercetin | Superoxide dismutase [Cu-Zn] | 4152 | validated |
| MOL000098 | quercetin | Protein kinase C alpha type  | h001 | validated |
| MOL000098 | quercetin | Interstitial collagenase     | 1167 | validated |
|           |           | Hypoxia-inducible factor 1-  |      |           |
| MOL000098 | quercetin | alpha                        | h001 | validated |
|           |           | Signal transducer and        |      |           |
|           |           | activator of transcription   |      |           |
| MOL000098 | quercetin | 1-alpha/beta                 | h001 | validated |
| MOL000098 | quercetin | Protein CBFA2T1              | h001 | validated |
|           |           | Probable E3 ubiquitin-       |      |           |
| MOL000098 | quercetin | protein ligase HERC5         | h001 | validated |
|           |           | Cell division control        |      |           |
| MOL000098 | quercetin | protein 2 homolog            | 1771 | validated |
|           |           | 78 kDa glucose-regulated     |      |           |
| MOL000098 | quercetin | protein                      | 1847 | validated |
|           |           | Receptor tyrosine-protein    |      |           |
| MOL000098 | quercetin | kinase erbB-2                | h001 | validated |
|           |           | Peroxisome proliferator-     |      |           |
| MOL000098 | quercetin | activated receptor gamma     | h001 | validated |
| MOL000098 | quercetin | Acetyl-CoA carboxylase 1     | 690  | validated |
| MOL000098 | quercetin | Heme oxygenase 1             | 3391 | validated |
| MOL000098 | quercetin | Cytochrome P450 3A4          | 4512 | validated |
| MOL000098 | quercetin | Caveolin-1                   | h001 | validated |
| MOL000098 | quercetin | Myc proto-oncogene protein   | h001 | validated |
| MOL000098 | quercetin | Tissue factor                | 2139 | validated |
| MOL000098 | quercetin | Gap junction alpha-1 protein | 1827 | validated |
| MOL000098 | quercetin | Cytochrome P450 1A1          | h001 | validated |
|           |           | Intercellular adhesion       |      |           |
| MOL000098 | quercetin | molecule 1                   | h001 | validated |
| MOL000098 | quercetin | Interleukin-1 beta           | 1654 | validated |
| MOL000098 | quercetin | Small inducible cytokine A2  | 1649 | validated |
| MOL000098 | quercetin | E-selectin                   | 1756 | validated |
|           |           | Vascular cell adhesion       |      |           |
| MOL000098 | quercetin | protein 1                    | 1908 | validated |
|           |           | Prostaglandin E2 receptor,   |      |           |
| MOL000098 | quercetin | EP3 subtype                  | 4131 | validated |
| MOL000098 | quercetin | Interleukin-8                | h001 | validated |
| MOL000098 | quercetin | Protein kinase C beta type   | h001 | validated |
|           |           | Baculoviral IAP repeat-      |      |           |
| MOL000098 | quercetin | containing protein 5         | h001 | validated |
| MOL000098 | quercetin | Dual oxidase 2               | h001 | validated |
|           |           | Nitric oxide synthase,       |      |           |
| MOL000098 | quercetin | endothelial                  | h001 | validated |
| MOL000098 | quercetin | Heat shock protein beta-1    | h001 | validated |

|           |           |                                                                                            |      |           |
|-----------|-----------|--------------------------------------------------------------------------------------------|------|-----------|
| MOL000098 | quercetin | Transforming growth factor<br>beta-1                                                       | h001 | validated |
| MOL000098 | quercetin | Maltase-glucoamylase,<br>intestinal                                                        | 929  | validated |
| MOL000098 | quercetin | Interleukin-2                                                                              | 1575 | validated |
| MOL000098 | quercetin | Nuclear receptor subfamily 1<br>group I member 2                                           | h001 | validated |
| MOL000098 | quercetin | Cytochrome P450 1B1                                                                        | h001 | validated |
| MOL000098 | quercetin | G2/mitotic-specific cyclin-<br>B1                                                          | h001 | validated |
| MOL000098 | quercetin | Tissue-type plasminogen<br>activator                                                       | 1792 | validated |
| MOL000098 | quercetin | Thrombomodulin                                                                             | 2021 | validated |
| MOL000098 | quercetin | Plasminogen activator<br>inhibitor 1                                                       | h001 | validated |
| MOL000098 | quercetin | Interferon gamma                                                                           | 1253 | validated |
| MOL000098 | quercetin | Arachidonate 5-lipoxygenase                                                                | 275  | validated |
| MOL000098 | quercetin | Phosphatidylinositol-3,4,5-<br>trisphosphate 3-phosphatase<br>and dual-specificity protein | h001 | validated |
| MOL000098 | quercetin | phosphatase PTEN                                                                           | h001 | validated |
| MOL000098 | quercetin | Interleukin-1 alpha                                                                        | h001 | validated |
| MOL000098 | quercetin | Myeloperoxidase                                                                            | 1757 | validated |
| MOL000098 | quercetin | DNA topoisomerase 2-alpha                                                                  | h001 | validated |
| MOL000098 | quercetin | Neutrophil cytosol factor 1                                                                | h001 | validated |
| MOL000098 | quercetin | ATP-binding cassette sub-<br>family G member 2                                             | h001 | validated |
| MOL000098 | quercetin | Hyaluronan synthase 2                                                                      | h001 | validated |
| MOL000098 | quercetin | Nuclear factor erythroid 2-<br>related factor 2                                            | h001 | validated |
| MOL000098 | quercetin | NAD(P)H dehydrogenase<br>[quinone] 1                                                       | 2157 | validated |
| MOL000098 | quercetin | Poly [ADP-ribose] polymerase<br>1                                                          | h001 | validated |
| MOL000098 | quercetin | Aryl hydrocarbon receptor                                                                  | 6220 | validated |
| MOL000098 | quercetin | 26S proteasome non-ATPase<br>regulatory subunit 3                                          | h001 | validated |
| MOL000098 | quercetin | Solute carrier family 2,<br>facilitated glucose<br>transporter member 4                    | h001 | validated |
| MOL000098 | quercetin | Collagen alpha-1(III) chain                                                                | 3853 | validated |
| MOL000098 | quercetin | DNA gyrase subunit B                                                                       | 4150 | validated |
| MOL000098 | quercetin | C-X-C motif chemokine 11                                                                   | h001 | validated |
| MOL000098 | quercetin | C-X-C motif chemokine 2                                                                    | h001 | validated |
| MOL000098 | quercetin | DDB1- and CUL4-associated<br>factor 5                                                      | h001 | validated |
| MOL000098 | quercetin | Nuclear receptor subfamily 1<br>group I member 3                                           | h001 | validated |
| MOL000098 | quercetin | Serine/threonine-protein<br>kinase Chk2                                                    | h001 | validated |
| MOL000098 | quercetin | Insulin receptor                                                                           | 36   | validated |
| MOL000098 | quercetin | Claudin-4                                                                                  | h001 | validated |



|           |           |                                                          |      |           |
|-----------|-----------|----------------------------------------------------------|------|-----------|
| MOL000098 | quercetin | Peroxisome proliferator-activated receptor alpha         | h001 | validated |
| MOL000098 | quercetin | Peroxisome proliferator-activated receptor delta         | h001 | validated |
| MOL000098 | quercetin | Heat shock factor protein 1                              | h001 | validated |
| MOL000098 | quercetin | C-reactive protein                                       | h001 | validated |
| MOL000098 | quercetin | C-X-C motif chemokine 10                                 | h001 | validated |
| MOL000098 | quercetin | Inhibitor of nuclear factor kappa-B kinase subunit alpha | h001 | validated |
| MOL000098 | quercetin | Osteopontin                                              | h001 | validated |
| MOL000098 | quercetin | Runt-related transcription factor 2                      | h001 | validated |
| MOL000098 | quercetin | Ras association domain-containing protein 1              | h001 | validated |
| MOL000098 | quercetin | Transcription factor E2F1                                | h001 | validated |
| MOL000098 | quercetin | Transcription factor E2F2                                | h001 | validated |
| MOL000098 | quercetin | Prostatic acid phosphatase                               | 1859 | validated |
| MOL000098 | quercetin | Cathepsin D                                              | 1243 | validated |
| MOL000098 | quercetin | Insulin-like growth factor-binding protein 3             | h001 | validated |
| MOL000098 | quercetin | Insulin-like growth factor II                            | h001 | validated |
| MOL000098 | quercetin | CD40 ligand                                              | h001 | validated |
| MOL000098 | quercetin | Interferon regulatory factor 1                           | h001 | validated |
| MOL000098 | quercetin | Receptor tyrosine-protein kinase erbB-3                  | h001 | validated |
| MOL000098 | quercetin | Serum paraoxonase/arylesterase 1                         | 1198 | validated |
| MOL000098 | quercetin | Type I iodothyronine deiodinase                          | h001 | validated |
| MOL000098 | quercetin | Procollagen C-endopeptidase enhancer 1                   | h001 | validated |
| MOL000098 | quercetin | Puromycin-sensitive aminopeptidase                       | h001 | validated |
| MOL000098 | quercetin | Hexokinase-2                                             | h001 | validated |
| MOL000098 | quercetin | Homeobox protein Nkx-3.1                                 | h001 | validated |
| MOL000098 | quercetin | Ras GTPase-activating protein 1                          | h001 | validated |
| MOL000098 | quercetin | Peroxidase ClA                                           | h001 | validated |
| MOL000098 | quercetin | Glutathione S-transferase Mu 1                           | 896  | validated |
| MOL000098 | quercetin | Glutathione S-transferase Mu 2                           | 2165 | validated |
| MOL000003 | MTL       |                                                          |      |           |
| MOL000003 | MTL       | Cytochrome P450-cam                                      | 2298 |           |
| MOL000023 | Hemo-sol  | Prostaglandin G/H synthase 2                             | 290  |           |
| MOL000023 | Hemo-sol  | Gamma-aminobutyric-acid receptor subunit alpha-1         | 872  |           |
| MOL000023 | Hemo-sol  |                                                          |      |           |
| MOL000023 | Hemo-sol  |                                                          |      |           |

|           |                     |                              |      |
|-----------|---------------------|------------------------------|------|
| MOL000023 | Hemo-sol            | Cytochrome P450-cam          | 2298 |
|           |                     | Nuclear receptor coactivator |      |
| MOL000023 | Hemo-sol            | 2                            | 6241 |
|           |                     | Nuclear receptor coactivator |      |
| MOL000023 | Hemo-sol            | 1                            | 6228 |
|           |                     | Muscarinic acetylcholine     |      |
| MOL000023 | Hemo-sol            | receptor M2                  | 617  |
|           |                     | Gamma-aminobutyric-acid      |      |
| MOL000023 | Hemo-sol            | receptor subunit alpha-2     | 423  |
|           |                     | Muscarinic acetylcholine     |      |
| MOL000023 | Hemo-sol            | receptor M1                  | 103  |
|           |                     | Gamma-aminobutyric-acid      |      |
| MOL000023 | Hemo-sol            | receptor subunit alpha-5     | 523  |
|           |                     | Gamma-aminobutyric-acid      |      |
| MOL000023 | Hemo-sol            | receptor subunit alpha-3     | 580  |
| MOL000023 | Hemo-sol            | Ig gamma-1 chain C region    | 4785 |
|           |                     | Gamma-aminobutyric-acid      |      |
| MOL000023 | Hemo-sol            | receptor subunit alpha-6     | 841  |
| MOL000035 | beta-Selinene       | Prostaglandin G/H synthase 1 | 20   |
|           |                     | Muscarinic acetylcholine     |      |
| MOL000035 | beta-Selinene       | receptor M3                  | 51   |
|           |                     | Muscarinic acetylcholine     |      |
| MOL000035 | beta-Selinene       | receptor M1                  | 103  |
| MOL000035 | beta-Selinene       | Prostaglandin G/H synthase 2 | 290  |
|           |                     | Gamma-aminobutyric-acid      |      |
| MOL000035 | beta-Selinene       | receptor subunit alpha-2     | 423  |
|           |                     | Retinoic acid receptor RXR-  |      |
| MOL000035 | beta-Selinene       | alpha                        | 459  |
|           |                     | Sodium-dependent             |      |
| MOL000035 | beta-Selinene       | noradrenaline transporter    | 540  |
|           |                     | Gamma-aminobutyric-acid      |      |
| MOL000035 | beta-Selinene       | receptor subunit alpha-3     | 580  |
|           |                     | Muscarinic acetylcholine     |      |
| MOL000035 | beta-Selinene       | receptor M2                  | 617  |
| MOL000035 | beta-Selinene       | Alpha-1B adrenergic receptor | 632  |
|           |                     | Gamma-aminobutyric-acid      |      |
| MOL000035 | beta-Selinene       | receptor subunit alpha-1     | 872  |
|           |                     | Nuclear receptor coactivator |      |
| MOL000035 | beta-Selinene       | 2                            | 6241 |
|           |                     | Gamma-aminobutyric-acid      |      |
| MOL000035 | beta-Selinene       | receptor subunit alpha-6     | 841  |
| MOL000105 | protocatechuic acid | Prostaglandin G/H synthase 1 | 20   |
| MOL000105 | protocatechuic acid | Arachidonate 5-lipoxygenase  | 275  |
| MOL000105 | protocatechuic acid | Prostaglandin G/H synthase 2 | 290  |
|           |                     | Amine oxidase [flavin-       |      |
| MOL000105 | protocatechuic acid | containing] B                | 3939 |
| MOL000105 | protocatechuic acid | Lysozyme                     | 2300 |

|           |                     |                                                            |      |           |  |
|-----------|---------------------|------------------------------------------------------------|------|-----------|--|
|           |                     | Nicotinate-nucleotide--<br>dimethylbenzimidazole           |      |           |  |
| MOL000105 | protocatechuic acid | phosphoribosyltransferase                                  | 2264 |           |  |
| MOL000105 | protocatechuic acid |                                                            |      |           |  |
| MOL000105 | protocatechuic acid | Trypsin-3                                                  | 2886 |           |  |
| MOL000105 | protocatechuic acid | Protein kinase C alpha type                                | h001 | validated |  |
| MOL000105 | protocatechuic acid | Protein kinase C beta type                                 | h001 | validated |  |
| MOL000105 | protocatechuic acid | Protein kinase C gamma type                                | h001 | validated |  |
|           |                     | Maltase-glucoamylase,                                      |      |           |  |
| MOL000105 | protocatechuic acid | intestinal                                                 | 929  | validated |  |
| MOL000105 | protocatechuic acid | Protein kinase C zeta type                                 | h001 | validated |  |
| MOL000116 | Nonanal             |                                                            |      |           |  |
| MOL000116 | Nonanal             |                                                            |      |           |  |
|           |                     | Gamma-aminobutyric-acid                                    |      |           |  |
| MOL000116 | Nonanal             | receptor subunit alpha-2                                   | 423  |           |  |
|           |                     | Gamma-aminobutyric-acid                                    |      |           |  |
| MOL000116 | Nonanal             | receptor subunit alpha-1                                   | 872  |           |  |
| MOL000116 | Nonanal             | Cytochrome P450-cam                                        | 2298 |           |  |
| MOL000120 | dec-2-enal          |                                                            |      |           |  |
| MOL000120 | dec-2-enal          |                                                            |      |           |  |
| MOL000131 |                     | EIC Prostaglandin G/H synthase 1                           | 20   |           |  |
| MOL000131 |                     | EIC Prostaglandin G/H synthase 2                           | 290  |           |  |
|           |                     | Retinoic acid receptor RXR-                                |      |           |  |
| MOL000131 | EIC                 | alpha                                                      | 459  |           |  |
|           |                     | Nuclear receptor coactivator                               |      |           |  |
| MOL000131 | EIC                 | 2                                                          | 6241 |           |  |
| MOL000131 | EIC                 | Lysozyme                                                   | 2300 |           |  |
|           |                     | Nicotinate-nucleotide--<br>dimethylbenzimidazole           |      |           |  |
| MOL000131 | EIC                 | phosphoribosyltransferase                                  | 2264 |           |  |
|           |                     | Sodium-dependent                                           |      |           |  |
| MOL000131 | EIC                 | noradrenaline transporter                                  | 540  |           |  |
| MOL000131 | EIC                 | Ig gamma-1 chain C region                                  | 4785 |           |  |
|           |                     | Gamma-aminobutyric-acid                                    |      |           |  |
| MOL000131 | EIC                 | receptor subunit alpha-2                                   | 423  |           |  |
|           |                     | Gamma-aminobutyric-acid                                    |      |           |  |
| MOL000131 | EIC                 | receptor subunit alpha-1                                   | 872  |           |  |
| MOL000131 | EIC                 | Cytochrome P450-cam                                        | 2298 |           |  |
|           |                     | Transient receptor potential<br>cation channel subfamily V |      |           |  |
| MOL000131 | EIC                 | member 1                                                   | 1558 |           |  |
|           |                     | Muscarinic acetylcholine                                   |      |           |  |
| MOL000131 | EIC                 | receptor M1                                                | 103  |           |  |
|           |                     | Muscarinic acetylcholine                                   |      |           |  |
| MOL000131 | EIC                 | receptor M2                                                | 617  |           |  |
|           |                     | Gamma-aminobutyric-acid                                    |      |           |  |
| MOL000131 | EIC                 | receptor subunit alpha-6                                   | 841  |           |  |
| MOL000223 | caffeic acid        | Prostaglandin G/H synthase 1                               | 20   | validated |  |
| MOL000223 | caffeic acid        | Beta-1 adrenergic receptor                                 | 193  |           |  |

|           |              |                                                    |      |           |
|-----------|--------------|----------------------------------------------------|------|-----------|
| MOL000223 | caffeic acid | Prostaglandin G/H synthase 2                       | 290  | validated |
| MOL000223 | caffeic acid | Alpha-2A adrenergic receptor                       | 318  |           |
| MOL000223 | caffeic acid | Alpha-2C adrenergic receptor                       | 378  |           |
| MOL000223 | caffeic acid | Beta-2 adrenergic receptor                         | 766  |           |
| MOL000223 | caffeic acid | Amine oxidase [flavin-containing] B                | 3939 |           |
| MOL000223 | caffeic acid | Chymotrypsinogen B                                 | 6011 |           |
| MOL000223 | caffeic acid | Sodium-dependent dopamine transporter              | 713  |           |
| MOL000223 | caffeic acid | Aldose reductase                                   | 822  |           |
| MOL000223 | caffeic acid | Urokinase-type plasminogen activator               | 1074 |           |
| MOL000223 | caffeic acid | Amine oxidase [flavin-containing] A                | 3941 |           |
| MOL000223 | caffeic acid | Lysozyme                                           | 2300 |           |
| MOL000223 | caffeic acid | Alpha-1A adrenergic receptor                       | 556  |           |
| MOL000223 | caffeic acid | Alpha-1D adrenergic receptor                       | 789  |           |
| MOL000223 | caffeic acid | Tumor necrosis factor                              | 777  | validated |
| MOL000223 | caffeic acid | Cytochrome P450 1A1                                | h001 | validated |
| MOL000223 | caffeic acid | Protein kinase C beta type                         | h001 | validated |
| MOL000223 | caffeic acid | Tyrosine-protein kinase BTK                        | 2355 | validated |
| MOL000223 | caffeic acid | Glial fibrillary acidic protein                    | h001 | validated |
| MOL000223 | caffeic acid | Insulin-like growth factor II                      | h001 | validated |
| MOL000223 | caffeic acid | P-selectin                                         | 2058 | validated |
| MOL000223 | caffeic acid | Ras-related C3 botulinum toxin substrate 1         | 1882 | validated |
| MOL000252 | farnesol     | Prostaglandin G/H synthase 2                       | 290  |           |
| MOL000252 | farnesol     | Sodium-dependent noradrenaline transporter         | 540  |           |
| MOL000252 | farnesol     | Amine oxidase [flavin-containing] B                | 3939 |           |
| MOL000252 | farnesol     | Nuclear receptor coactivator 2                     | 6241 |           |
| MOL000252 | farnesol     | Prostaglandin G/H synthase 1                       | 20   |           |
| MOL000252 | farnesol     | Retinoic acid receptor RXR-alpha                   | 459  |           |
| MOL000252 | farnesol     | Interleukin-6                                      | 1159 | validated |
| MOL000252 | farnesol     | Caspase-3                                          | h001 | validated |
| MOL000252 | farnesol     | Involucrin                                         | h001 | validated |
| MOL000252 | farnesol     | Ras-specific guanine nucleotide-releasing factor 2 | h001 | validated |
| MOL000252 | farnesol     | Bcl-2 homologous antagonist/killer                 | h001 | validated |

|           |                 |                                                     |      |           |
|-----------|-----------------|-----------------------------------------------------|------|-----------|
| MOL000252 | farnesol        | Toll-like receptor 4                                | 4210 | validated |
| MOL000252 | farnesol        | Lipoprotein lipase                                  | 266  | validated |
| MOL000252 | farnesol        | 3-hydroxy-3-methylglutaryl-coenzyme A reductase     | 3387 | validated |
| MOL000252 | farnesol        | Peroxisome proliferator-activated receptor alpha    | h001 | validated |
| MOL000252 | farnesol        | Toll-like receptor 2                                | 2090 | validated |
| MOL000252 | farnesol        | Beta-defensin 2                                     | h001 | validated |
| MOL000252 | farnesol        | Protein HIRA                                        | h001 | validated |
| MOL000252 | farnesol        | SERTA domain-containing protein 3                   | h001 | validated |
| MOL000252 | farnesol        | Progesterone receptor                               | 614  | validated |
| MOL000252 | farnesol        | Bile acid receptor                                  | 3233 | validated |
| MOL000252 | farnesol        | Glutaminase liver isoform, mitochondrial            | 5    | validated |
| MOL000252 | farnesol        | Ig delta chain C region                             | h001 | validated |
| MOL000263 | oleanolic acid  | Caspase-9                                           | h001 | validated |
| MOL000263 | oleanolic acid  | Caspase-3                                           | h001 | validated |
| MOL000263 | oleanolic acid  | Heme oxygenase 1                                    | 3391 | validated |
| MOL000263 | oleanolic acid  | Intercellular adhesion molecule 1                   | h001 | validated |
| MOL000263 | oleanolic acid  | NAD(P)H dehydrogenase [quinone] 1                   | 2157 | validated |
| MOL000263 | oleanolic acid  | Pancreatic alpha-amylase                            | 4513 | validated |
| MOL000305 | lauric acid     | Prostaglandin G/H synthase 1                        | 20   |           |
| MOL000305 | lauric acid     | Cholinesterase                                      | 3923 |           |
| MOL000305 | lauric acid     | Phospholipase A2                                    | 6500 |           |
| MOL000305 | lauric acid     |                                                     |      |           |
| MOL000305 | lauric acid     |                                                     |      |           |
| MOL000305 | lauric acid     | Ig gamma-1 chain C region                           | 4785 |           |
| MOL000305 | lauric acid     | Ferrichrome-iron receptor                           | 2427 |           |
| MOL000305 | lauric acid     | 3-oxoacyl-[acyl-carrier-protein] synthase 1         | 889  |           |
| MOL000305 | lauric acid     | Prostaglandin G/H synthase 2                        | 290  | validated |
| MOL000305 | lauric acid     | Genome polyprotein                                  | 6521 |           |
| MOL000305 | lauric acid     | Transcription factor p65                            | h001 | validated |
| MOL000305 | lauric acid     | RAC-alpha serine/threonine-protein kinase           | h001 | validated |
| MOL000305 | lauric acid     | Interleukin-6                                       | 1159 | validated |
| MOL000305 | lauric acid     | Interleukin-8                                       | h001 | validated |
| MOL000305 | lauric acid     | Dual oxidase 2                                      | h001 | validated |
| MOL000305 | lauric acid     | T-lymphocyte activation antigen CD80                | 944  | validated |
| MOL000305 | lauric acid     | T-lymphocyte activation antigen CD86                | 942  | validated |
| MOL000305 | lauric acid     | Tumor necrosis factor receptor superfamily member 5 | h001 | validated |
| MOL000358 | beta-sitosterol | Progesterone receptor                               | 614  |           |
| MOL000358 | beta-sitosterol | Nuclear receptor coactivator 2                      | 6241 |           |

|           |                 |                                                                                                                                 |      |           |
|-----------|-----------------|---------------------------------------------------------------------------------------------------------------------------------|------|-----------|
| MOL000358 | beta-sitosterol | Prostaglandin G/H synthase 1                                                                                                    | 20   |           |
| MOL000358 | beta-sitosterol | Prostaglandin G/H synthase 2                                                                                                    | 290  |           |
| MOL000358 | beta-sitosterol | Heat shock protein HSP 90-<br>alpha<br>Phosphatidylinositol-4,5-<br>bisphosphate 3-kinase<br>catalytic subunit gamma<br>isoform | 1939 |           |
| MOL000358 | beta-sitosterol |                                                                                                                                 | 2404 |           |
| MOL000358 | beta-sitosterol | Potassium voltage-gated<br>channel subfamily H member 2<br>cAMP-dependent protein<br>kinase catalytic subunit<br>alpha          | 101  |           |
| MOL000358 | beta-sitosterol |                                                                                                                                 | 6263 |           |
| MOL000358 | beta-sitosterol | D(1A) dopamine receptor<br>Muscarinic acetylcholine<br>receptor M3                                                              | 23   |           |
| MOL000358 | beta-sitosterol |                                                                                                                                 | 51   |           |
| MOL000358 | beta-sitosterol | Muscarinic acetylcholine<br>receptor M1                                                                                         | 103  |           |
| MOL000358 | beta-sitosterol | Sodium channel protein type<br>5 subunit alpha                                                                                  | 220  |           |
| MOL000358 | beta-sitosterol | Gamma-aminobutyric-acid<br>receptor subunit alpha-2                                                                             | 423  |           |
| MOL000358 | beta-sitosterol | Muscarinic acetylcholine<br>receptor M4                                                                                         | 450  |           |
| MOL000358 | beta-sitosterol | cGMP-inhibited 3',5'-cyclic<br>phosphodiesterase A                                                                              | 485  |           |
| MOL000358 | beta-sitosterol | 5-hydroxytryptamine 2A<br>receptor                                                                                              | 502  |           |
| MOL000358 | beta-sitosterol | Gamma-aminobutyric-acid<br>receptor subunit alpha-5                                                                             | 523  |           |
| MOL000358 | beta-sitosterol | Alpha-1A adrenergic receptor                                                                                                    | 556  |           |
| MOL000358 | beta-sitosterol | Gamma-aminobutyric-acid<br>receptor subunit alpha-3                                                                             | 580  |           |
| MOL000358 | beta-sitosterol | Muscarinic acetylcholine<br>receptor M2                                                                                         | 617  |           |
| MOL000358 | beta-sitosterol | Alpha-1B adrenergic receptor                                                                                                    | 632  |           |
| MOL000358 | beta-sitosterol | Beta-2 adrenergic receptor                                                                                                      | 766  |           |
| MOL000358 | beta-sitosterol | Neuronal acetylcholine<br>receptor subunit alpha-2                                                                              | 813  |           |
| MOL000358 | beta-sitosterol | Sodium-dependent serotonin<br>transporter                                                                                       | 824  |           |
| MOL000358 | beta-sitosterol | Mu-type opioid receptor                                                                                                         | 847  |           |
| MOL000358 | beta-sitosterol | Gamma-aminobutyric-acid<br>receptor subunit alpha-1                                                                             | 872  |           |
| MOL000358 | beta-sitosterol | Neuronal acetylcholine<br>receptor subunit alpha-7                                                                              | 4095 |           |
| MOL000358 | beta-sitosterol | Cytochrome P450-cam                                                                                                             | 2298 |           |
| MOL000358 | beta-sitosterol | Apoptosis regulator Bcl-2                                                                                                       | 273  | validated |

|           |                 |                                                               |      |           |
|-----------|-----------------|---------------------------------------------------------------|------|-----------|
| MOL000358 | beta-sitosterol | Apoptosis regulator BAX                                       | h001 | validated |
| MOL000358 | beta-sitosterol | Caspase-9                                                     | h001 | validated |
| MOL000358 | beta-sitosterol | Transcription factor AP-1                                     | 1629 | validated |
| MOL000358 | beta-sitosterol | Caspase-3                                                     | h001 | validated |
| MOL000358 | beta-sitosterol | Caspase-8                                                     | h001 | validated |
| MOL000358 | beta-sitosterol | Protein kinase C alpha type<br>Transforming growth factor     | h001 | validated |
| MOL000358 | beta-sitosterol | beta-1<br>Serum                                               | h001 | validated |
| MOL000358 | beta-sitosterol | paraoxonase/arylesterase 1<br>Microtubule-associated          | 1198 | validated |
| MOL000358 | beta-sitosterol | protein 2                                                     | 1852 | validated |
| MOL000365 | syringaresinol  | Coagulation factor X                                          | 239  |           |
| MOL000365 | syringaresinol  | Prostaglandin G/H synthase 2                                  | 290  |           |
| MOL000365 | syringaresinol  | DNA topoisomerase 2-alpha<br>Nuclear receptor coactivator     | 817  |           |
| MOL000365 | syringaresinol  | 2                                                             | 6241 |           |
| MOL000365 | syringaresinol  | Calmodulin                                                    | 465  |           |
| MOL000365 | syringaresinol  | Potassium voltage-gated<br>channel subfamily H member 2       | 101  |           |
| MOL000365 | syringaresinol  | Coagulation factor VII<br>Calcium-activated potassium         | 369  |           |
| MOL000365 | syringaresinol  | channel subunit alpha 1<br>Heat shock protein HSP 90-         | 610  |           |
| MOL000365 | syringaresinol  | alpha                                                         | 1939 |           |
| MOL000422 | kaempferol      | Nitric oxide synthase,<br>inducible                           | 7    | validated |
| MOL000422 | kaempferol      | Prostaglandin G/H synthase 1                                  | 20   |           |
| MOL000422 | kaempferol      | Androgen receptor<br>Peroxisome proliferator-                 | 146  |           |
| MOL000422 | kaempferol      | activated receptor gamma                                      | 238  |           |
| MOL000422 | kaempferol      | Prostaglandin G/H synthase 2<br>Heat shock protein HSP 90-    | 290  | validated |
| MOL000422 | kaempferol      | alpha<br>Phosphatidylinositol-4, 5-                           | 1939 |           |
| MOL000422 | kaempferol      | bisphosphate 3-kinase<br>catalytic subunit gamma              | 2404 |           |
| MOL000422 | kaempferol      | isoform<br>cAMP-dependent protein<br>kinase catalytic subunit | 6263 |           |
| MOL000422 | kaempferol      | alpha<br>Nuclear receptor coactivator                         | 6241 |           |
| MOL000422 | kaempferol      | 2                                                             | 952  |           |
| MOL000422 | kaempferol      | Dipeptidyl peptidase 4<br>Trypsin-1                           | 3176 |           |
| MOL000422 | kaempferol      | Progesterone receptor                                         | 614  |           |
| MOL000422 | kaempferol      | Prothrombin                                                   | 54   |           |
| MOL000422 | kaempferol      | Muscarinic acetylcholine<br>receptor M1                       | 103  |           |

|           |            |                                                            |              |           |           |
|-----------|------------|------------------------------------------------------------|--------------|-----------|-----------|
| MOL000422 | kaempferol | Nitric-oxide synthase,<br>endothelial                      | 291          |           |           |
| MOL000422 | kaempferol | Gamma-aminobutyric-acid<br>receptor subunit alpha-2        | 423          |           |           |
| MOL000422 | kaempferol | Acetylcholinesterase                                       | 474          |           |           |
| MOL000422 | kaempferol | Sodium-dependent<br>noradrenaline transporter              | 540          |           |           |
| MOL000422 | kaempferol | Muscarinic acetylcholine<br>receptor M2                    | 617          |           |           |
| MOL000422 | kaempferol | Alpha-1B adrenergic receptor                               | 632          |           |           |
| MOL000422 | kaempferol | Gamma-aminobutyric-acid<br>receptor subunit alpha-1        | 872          |           |           |
| MOL000422 | kaempferol | DNA topoisomerase 2-alpha                                  | 817          |           |           |
| MOL000422 | kaempferol | Coagulation factor VII                                     | 369          |           |           |
| MOL000422 | kaempferol | Calmodulin                                                 | 465          |           |           |
| MOL000422 | kaempferol | Transcription factor p65                                   | h001         | validated |           |
| MOL000422 | kaempferol | Inhibitor of nuclear factor<br>kappa-B kinase subunit beta | h001         | validated |           |
| MOL000422 | kaempferol | RAC-alpha serine/threonine-<br>protein kinase              | h001         | validated |           |
| MOL000422 | kaempferol | Apoptosis regulator Bcl-2                                  | 273          | validated |           |
| MOL000422 | kaempferol | Apoptosis regulator BAX                                    | h001         | validated |           |
| MOL000422 | kaempferol | Tumor necrosis factor                                      | 777          | validated |           |
| MOL000422 | kaempferol | Transcription factor AP-1                                  | 1629         | validated |           |
| MOL000422 | kaempferol | Activator of 90 kDa heat<br>shock protein ATPase homolog   | 1            | h001      | validated |
| MOL000422 | kaempferol | Caspase-3                                                  | h001         | validated |           |
| MOL000422 | kaempferol | Mitogen-activated protein<br>kinase 8                      | 6292         | validated |           |
| MOL000422 | kaempferol | Xanthine<br>dehydrogenase/oxidase                          | 3947         | validated |           |
| MOL000422 | kaempferol | Interstitial collagenase                                   | 1167         | validated |           |
| MOL000422 | kaempferol | Signal transducer and<br>activator of transcription        | 1-alpha/beta | h001      | validated |
| MOL000422 | kaempferol | Cell division control<br>protein 2 homolog                 | 1771         | validated |           |
| MOL000422 | kaempferol | Peroxisome proliferator-<br>activated receptor gamma       | h001         | validated |           |
| MOL000422 | kaempferol | Heme oxygenase 1                                           | 3391         | validated |           |
| MOL000422 | kaempferol | Cytochrome P450 3A4                                        | 4512         | validated |           |
| MOL000422 | kaempferol | Cytochrome P450 1A1                                        | h001         | validated |           |
| MOL000422 | kaempferol | Intercellular adhesion<br>molecule 1                       | h001         | validated |           |
| MOL000422 | kaempferol | E-selectin                                                 | 1756         | validated |           |
| MOL000422 | kaempferol | Vascular cell adhesion<br>protein 1                        | 1908         | validated |           |
| MOL000422 | kaempferol | Nuclear receptor subfamily 1<br>group I member 2           | h001         | validated |           |
| MOL000422 | kaempferol | Cytochrome P450 1B1                                        | h001         | validated |           |



|           |              |                                                                               |      |           |
|-----------|--------------|-------------------------------------------------------------------------------|------|-----------|
| MOL000422 | kaempferol   | Arachidonate 5-lipoxygenase                                                   | 275  | validated |
| MOL000422 | kaempferol   | Hyaluronan synthase 2                                                         | h001 | validated |
| MOL000422 | kaempferol   | Aryl hydrocarbon receptor                                                     | 6220 | validated |
| MOL000422 | kaempferol   | 26S proteasome non-ATPase<br>regulatory subunit 3                             | h001 | validated |
| MOL000422 | kaempferol   | Solute carrier family 2,<br>facilitated glucose<br>transporter member 4       | h001 | validated |
| MOL000422 | kaempferol   | Nuclear receptor subfamily 1<br>group I member 3                              | h001 | validated |
| MOL000422 | kaempferol   | Insulin receptor                                                              | 36   | validated |
| MOL000422 | kaempferol   | Type I iodothyronine<br>deiodinase                                            | h001 | validated |
| MOL000422 | kaempferol   | Serine/threonine-protein<br>phosphatase 2B catalytic<br>subunit alpha isoform | 6746 | validated |
| MOL000422 | kaempferol   | Peroxidase ClA                                                                | h001 | validated |
| MOL000422 | kaempferol   | Glutathione S-transferase Mu<br>1                                             | 896  | validated |
| MOL000422 | kaempferol   | Glutathione S-transferase Mu<br>2                                             | 2165 | validated |
| MOL000422 | kaempferol   | Aldo-keto reductase family 1<br>member C3                                     | 650  | validated |
| MOL000422 | kaempferol   | Antileukoproteinase                                                           | h001 | validated |
| MOL000449 | Stigmasterol | Progesterone receptor                                                         | 614  |           |
| MOL000449 | Stigmasterol | Mineralocorticoid receptor                                                    | 737  |           |
| MOL000449 | Stigmasterol | Nuclear receptor coactivator<br>2                                             | 6241 |           |
| MOL000449 | Stigmasterol | Ig gamma-1 chain C region                                                     | 4785 |           |
| MOL000449 | Stigmasterol | Retinoic acid receptor RXR-<br>alpha                                          | 459  |           |
| MOL000449 | Stigmasterol | Nuclear receptor coactivator<br>1                                             | 6228 |           |
| MOL000449 | Stigmasterol | Prostaglandin G/H synthase 1                                                  | 20   |           |
| MOL000449 | Stigmasterol | Prostaglandin G/H synthase 2                                                  | 290  |           |
| MOL000449 | Stigmasterol | Alpha-2A adrenergic receptor<br>Sodium-dependent                              | 318  |           |
| MOL000449 | Stigmasterol | noradrenaline transporter<br>Sodium-dependent dopamine<br>transporter         | 540  |           |
| MOL000449 | Stigmasterol | Beta-2 adrenergic receptor                                                    | 713  |           |
| MOL000449 | Stigmasterol | Aldose reductase                                                              | 766  |           |
| MOL000449 | Stigmasterol | Urokinase-type plasminogen<br>activator                                       | 822  |           |
| MOL000449 | Stigmasterol | Leukotriene A-4 hydrolase                                                     | 1074 |           |
| MOL000449 | Stigmasterol | Amine oxidase [flavin-<br>containing] B                                       | 3060 |           |
| MOL000449 | Stigmasterol | Amine oxidase [flavin-<br>containing] A                                       | 3939 |           |
| MOL000449 | Stigmasterol |                                                                               | 3941 |           |

|           |              |                                                    |      |           |
|-----------|--------------|----------------------------------------------------|------|-----------|
|           |              | cAMP-dependent protein<br>kinase catalytic subunit |      |           |
| MOL000449 | Stigmasterol | alpha                                              | 6263 |           |
| MOL000449 | Stigmasterol | Chymotrypsinogen B                                 | 6011 |           |
|           |              | Muscarinic acetylcholine                           |      |           |
| MOL000449 | Stigmasterol | receptor M3                                        | 51   |           |
|           |              | Muscarinic acetylcholine                           |      |           |
| MOL000449 | Stigmasterol | receptor M1                                        | 103  |           |
| MOL000449 | Stigmasterol | Beta-1 adrenergic receptor                         | 193  |           |
|           |              | Sodium channel protein type                        |      |           |
| MOL000449 | Stigmasterol | 5 subunit alpha                                    | 220  |           |
|           |              | 5-hydroxytryptamine 2A                             |      |           |
| MOL000449 | Stigmasterol | receptor                                           | 502  |           |
|           |              |                                                    |      |           |
| MOL000449 | Stigmasterol | Alpha-1A adrenergic receptor                       | 556  |           |
|           |              | Gamma-aminobutyric-acid                            |      |           |
| MOL000449 | Stigmasterol | receptor subunit alpha-3                           | 580  |           |
|           |              | Muscarinic acetylcholine                           |      |           |
| MOL000449 | Stigmasterol | receptor M2                                        | 617  |           |
|           |              |                                                    |      |           |
| MOL000449 | Stigmasterol | Alpha-1B adrenergic receptor                       | 632  |           |
|           |              | Gamma-aminobutyric-acid                            |      |           |
| MOL000449 | Stigmasterol | receptor subunit alpha-1                           | 872  |           |
|           |              | Neuronal acetylcholine                             |      |           |
| MOL000449 | Stigmasterol | receptor subunit alpha-7                           | 4095 |           |
|           |              | Gamma-aminobutyric-acid                            |      |           |
| MOL000478 | Eucarvone    | receptor subunit alpha-2                           | 423  |           |
|           |              | Gamma-aminobutyric-acid                            |      |           |
| MOL000478 | Eucarvone    | receptor subunit alpha-5                           | 523  |           |
|           |              | Muscarinic acetylcholine                           |      |           |
| MOL000478 | Eucarvone    | receptor M2                                        | 617  |           |
|           |              | Gamma-aminobutyric-acid                            |      |           |
| MOL000478 | Eucarvone    | receptor subunit alpha-1                           | 872  |           |
| MOL000478 | Eucarvone    | Cytochrome P450-cam                                | 2298 |           |
| MOL000478 | Eucarvone    | Glucocorticoid receptor                            | 871  |           |
| MOL000666 | hexanal      | Tumor necrosis factor                              | 777  | validated |
| MOL000666 | hexanal      | Transcription factor AP-1                          | 1629 | validated |
| MOL000666 | hexanal      | Tissue factor                                      | 2139 | validated |
|           |              | Mitogen-activated protein                          |      |           |
| MOL000666 | hexanal      | kinase 10                                          | 1836 | validated |
| MOL000666 | hexanal      | Abl interactor 1                                   | h001 | validated |
| MOL000666 | hexanal      | Platelet glycoprotein 4                            | h001 | validated |
|           |              | Sodium-dependent                                   |      |           |
| MOL000668 | PENTYLFURAN  | noradrenaline transporter                          | 540  |           |
|           |              |                                                    |      |           |
| MOL000668 | PENTYLFURAN  | Alpha-1A adrenergic receptor                       | 556  |           |
|           |              |                                                    |      |           |
| MOL000675 | oleic acid   | Prostaglandin G/H synthase 1                       | 20   |           |
|           |              | Nuclear receptor coactivator                       |      |           |
| MOL000675 | oleic acid   | 2                                                  | 6241 |           |
|           |              |                                                    |      |           |
| MOL000675 | oleic acid   | Prostaglandin G/H synthase 2                       | 290  |           |
| MOL000675 | oleic acid   |                                                    |      |           |

|           |            |                                                  |      |           |
|-----------|------------|--------------------------------------------------|------|-----------|
| MOL000675 | oleic acid |                                                  |      |           |
| MOL000675 | oleic acid |                                                  |      |           |
| MOL000675 | oleic acid | Lysozyme                                         | 2300 |           |
|           |            | Nicotinate-nucleotide--<br>dimethylbenzimidazole |      |           |
| MOL000675 | oleic acid | phosphoribosyltransferase                        | 2264 |           |
| MOL000675 | oleic acid | Trypsin-3                                        | 2886 |           |
|           |            | Retinoic acid receptor RXR-                      |      |           |
| MOL000675 | oleic acid | alpha                                            | 459  |           |
| MOL000675 | oleic acid | Cytochrome P450-cam                              | 2298 |           |
|           |            | Urokinase-type plasminogen                       |      |           |
| MOL000675 | oleic acid | activator                                        | 1074 | validated |
|           |            |                                                  |      |           |
| MOL000675 | oleic acid | Superoxide dismutase [Cu-Zn]                     | 4152 | validated |
| MOL000675 | oleic acid |                                                  |      | validated |
|           |            | Telomerase protein component                     |      |           |
| MOL000675 | oleic acid | 1                                                | h001 | validated |
| MOL000675 | oleic acid | Endothelin-1                                     | h001 | validated |
|           |            | Receptor tyrosine-protein                        |      |           |
| MOL000675 | oleic acid | kinase erbB-2                                    | h001 | validated |
|           |            | Peroxisome proliferator-                         |      |           |
| MOL000675 | oleic acid | activated receptor gamma                         | h001 | validated |
| MOL000675 | oleic acid | Lipoprotein lipase                               | 266  | validated |
| MOL000675 | oleic acid | Neuromodulin                                     | h001 | validated |
|           |            | Plasminogen activator                            |      |           |
| MOL000675 | oleic acid | inhibitor 1                                      | h001 | validated |
|           |            | Brain-derived neurotrophic                       |      |           |
| MOL000675 | oleic acid | factor                                           | h001 | validated |
|           |            | 3-hydroxy-3-methylglutaryl-                      |      |           |
| MOL000675 | oleic acid | coenzyme A reductase                             | 3387 | validated |
| MOL000675 | oleic acid | Myeloperoxidase                                  | 1757 | validated |
|           |            | Peroxisome proliferator-                         |      |           |
| MOL000675 | oleic acid | activated receptor alpha                         | h001 | validated |
|           |            | Peroxisome proliferator-                         |      |           |
| MOL000675 | oleic acid | activated receptor delta                         | h001 | validated |
| MOL000675 | oleic acid | C-reactive protein                               | h001 | validated |
|           |            | Serum                                            |      |           |
| MOL000675 | oleic acid | paraoxonase/arylesterase 1                       | 1198 | validated |
| MOL000675 | oleic acid | Insulin                                          | 5961 | validated |
| MOL000675 | oleic acid | Plasminogen                                      | 234  | validated |
|           |            | Fatty acid-binding protein,                      |      |           |
| MOL000675 | oleic acid | liver                                            | h001 | validated |
| MOL000675 | oleic acid | Retinol-binding protein 2                        | h001 | validated |
| MOL000675 | oleic acid | Glucagon                                         | h001 | validated |
| MOL000675 | oleic acid | Glutamyl aminopeptidase                          | 4020 | validated |
|           |            | Mitochondrial uncoupling                         |      |           |
| MOL000675 | oleic acid | protein 2                                        | h001 | validated |
| MOL000675 | oleic acid | Sterol O-acyltransferase 1                       | 117  | validated |
| MOL000675 | oleic acid | Cholecystokinin                                  | h001 | validated |
|           |            | Cbp/p300-interacting                             |      |           |
| MOL000675 | oleic acid | transactivator 1                                 | h001 | validated |
|           |            | Pancreas/duodenum homeobox                       |      |           |
| MOL000675 | oleic acid | protein 1                                        | h001 | validated |

|           |                      |                                                                                                    |      |           |
|-----------|----------------------|----------------------------------------------------------------------------------------------------|------|-----------|
| MOL000675 | oleic acid           | Solute carrier family 2,<br>facilitated glucose<br>transporter member 2                            | h001 | validated |
| MOL000675 | oleic acid           | Peptidyl-glycine alpha-<br>amidating monooxygenase                                                 | 3943 | validated |
| MOL000675 | oleic acid           | Acyl-CoA desaturase                                                                                | h001 | validated |
| MOL000675 | oleic acid           | Mitochondrial uncoupling<br>protein 3                                                              | h001 | validated |
| MOL000675 | oleic acid           | Cholesteryl ester transfer<br>protein                                                              | h001 | validated |
| MOL000675 | oleic acid           | Peptide YY                                                                                         | h001 | validated |
| MOL000675 | oleic acid           | Aspartyl aminopeptidase                                                                            | 4026 | validated |
| MOL000675 | oleic acid           | Cell-death-related nuclease<br>7                                                                   | h001 | validated |
| MOL000723 | trans-2,4-decadienal | Gamma-aminobutyric-acid<br>receptor subunit alpha-2                                                | 423  |           |
| MOL000723 | trans-2,4-decadienal | Gamma-aminobutyric-acid<br>receptor subunit alpha-1                                                | 872  |           |
| MOL000723 | trans-2,4-decadienal | Cytochrome P450-cam                                                                                | 2298 |           |
| MOL000723 | trans-2,4-decadienal | G1/S-specific cyclin-D1<br>Eukaryotic translation<br>initiation factor 6                           | h001 | validated |
| MOL000723 | trans-2,4-decadienal | Retinoblastoma-associated<br>protein                                                               | h001 | validated |
| MOL000723 | trans-2,4-decadienal | Cell division protein kinase<br>4                                                                  | 3846 | validated |
| MOL000723 | trans-2,4-decadienal |                                                                                                    | 3959 | validated |
| MOL000860 | stearic acid         | Prostaglandin G/H synthase 1                                                                       | 20   |           |
| MOL000860 | stearic acid         | Prostaglandin G/H synthase 2                                                                       | 290  |           |
| MOL000860 | stearic acid         | Retinoic acid receptor RXR-<br>alpha                                                               | 459  |           |
| MOL000860 | stearic acid         | Nuclear receptor coactivator<br>2                                                                  | 6241 |           |
| MOL000860 | stearic acid         | Ig gamma-1 chain C region                                                                          | 4785 |           |
| MOL000860 | stearic acid         | Transcription factor Spl<br>Ectonucleotide<br>pyrophosphatase/phosphodiesterase<br>family member 7 | h001 | validated |
| MOL000874 | paeonol              | Prostaglandin G/H synthase 1                                                                       | 20   |           |
| MOL000874 | paeonol              | Beta-1 adrenergic receptor                                                                         | 193  |           |
| MOL000874 | paeonol              | Prostaglandin G/H synthase 2                                                                       | 290  |           |
| MOL000874 | paeonol              | Alpha-2A adrenergic receptor                                                                       | 318  |           |
| MOL000874 | paeonol              | Alpha-2C adrenergic receptor                                                                       | 378  |           |
| MOL000874 | paeonol              | Sodium-dependent<br>noradrenaline transporter                                                      | 540  |           |
| MOL000874 | paeonol              | Alpha-2B adrenergic receptor                                                                       | 629  |           |

|           |                  |                              |      |           |
|-----------|------------------|------------------------------|------|-----------|
| MOL000874 | paeonol          | Alpha-1B adrenergic receptor | 632  |           |
|           |                  | Sodium-dependent dopamine    |      |           |
| MOL000874 | paeonol          | transporter                  | 713  |           |
| MOL000874 | paeonol          | Beta-2 adrenergic receptor   | 766  |           |
| MOL000874 | paeonol          | Alpha-1D adrenergic receptor | 789  |           |
| MOL000874 | paeonol          | Beta-lactamase               | 2478 |           |
|           |                  | Amine oxidase [flavin-       |      |           |
| MOL000874 | paeonol          | containing] B                | 3939 | validated |
|           |                  | Amine oxidase [flavin-       |      |           |
| MOL000874 | paeonol          | containing] A                | 3941 | validated |
| MOL000874 | paeonol          | Chymotrypsinogen B           | 6011 |           |
| MOL000874 | paeonol          | Alpha-1A adrenergic receptor | 556  |           |
|           |                  | Muscarinic acetylcholine     |      |           |
| MOL000874 | paeonol          | receptor M1                  | 103  |           |
|           |                  | Muscarinic acetylcholine     |      |           |
| MOL000874 | paeonol          | receptor M2                  | 617  |           |
| MOL000874 | paeonol          | Transcription factor p65     | h001 | validated |
|           |                  | RAC-alpha serine/threonine-  |      |           |
| MOL000874 | paeonol          | protein kinase               | h001 | validated |
| MOL000874 | paeonol          | Apoptosis regulator Bcl-2    | 273  | validated |
| MOL000874 | paeonol          | Apoptosis regulator BAX      | h001 | validated |
|           |                  | Mitogen-activated protein    |      |           |
| MOL000874 | paeonol          | kinase 1                     | 1176 | validated |
| MOL000874 | paeonol          | Tumor necrosis factor        | 777  | validated |
|           |                  | Activator of 90 kDa heat     |      |           |
|           |                  | shock protein ATPase homolog |      |           |
| MOL000874 | paeonol          | 1                            | h001 | validated |
| MOL000874 | paeonol          | NF-kappa-B inhibitor alpha   | h001 | validated |
|           |                  | Intercellular adhesion       |      |           |
| MOL000874 | paeonol          | molecule 1                   | h001 | validated |
| MOL000874 | paeonol          | Interleukin-2                | 1575 | validated |
| MOL000874 | paeonol          | Tyrosinase                   | h001 | validated |
|           |                  | Phosphatidylinositol-3,4,5-  |      |           |
|           |                  | trisphosphate 3-phosphatase  |      |           |
|           |                  | and dual-specificity protein |      |           |
| MOL000874 | paeonol          | phosphatase PTEN             | h001 | validated |
| MOL000879 | methyl palmitate | Prostaglandin G/H synthase 1 | 20   |           |
|           |                  | Nuclear receptor coactivator |      |           |
| MOL000879 | methyl palmitate | 2                            | 6241 |           |
| MOL000879 | methyl palmitate | Ig gamma-1 chain C region    | 4785 |           |
| MOL000879 | methyl palmitate | Transcription factor p65     | h001 | validated |
| MOL000879 | methyl palmitate | Interleukin-10               | h001 | validated |
| MOL000879 | methyl palmitate | Tumor necrosis factor        | 777  | validated |
| MOL000879 | methyl palmitate | Interleukin-6                | 1159 | validated |
| MOL000879 | methyl palmitate | Prostaglandin G/H synthase 2 | 290  | validated |
|           |                  | Prostaglandin E2 receptor,   |      |           |
| MOL000879 | methyl palmitate | EP3 subtype                  | 4131 | validated |
| MOL000896 | 13657-68-6       | Mineralocorticoid receptor   | 737  |           |

|           |              |                                                                               |      |
|-----------|--------------|-------------------------------------------------------------------------------|------|
| MOL000896 | 13657-68-6   | Muscarinic acetylcholine<br>receptor M1                                       | 103  |
| MOL000896 | 13657-68-6   | Gamma-aminobutyric-acid<br>receptor subunit alpha-2                           | 423  |
| MOL000896 | 13657-68-6   | Gamma-aminobutyric-acid<br>receptor subunit alpha-5                           | 523  |
| MOL000896 | 13657-68-6   | Gamma-aminobutyric-acid<br>receptor subunit alpha-3                           | 580  |
| MOL000896 | 13657-68-6   | Muscarinic acetylcholine<br>receptor M2                                       | 617  |
| MOL000896 | 13657-68-6   | Gamma-aminobutyric-acid<br>receptor subunit alpha-1                           | 872  |
| MOL000896 | 13657-68-6   | Ig gamma-1 chain C region                                                     | 4785 |
| MOL000896 | 13657-68-6   | Gamma-aminobutyric-acid<br>receptor subunit alpha-6                           | 841  |
| MOL000910 | Germacron    | Gamma-aminobutyric-acid<br>receptor subunit alpha-2                           | 423  |
| MOL000910 | Germacron    | Gamma-aminobutyric-acid<br>receptor subunit alpha-1                           | 872  |
| MOL000910 | Germacron    | Cytochrome P450-cam                                                           | 2298 |
| MOL000910 | Germacron    | Prostaglandin G/H synthase 1                                                  | 20   |
| MOL000910 | Germacron    | Muscarinic acetylcholine<br>receptor M1                                       | 103  |
| MOL000910 | Germacron    | Prostaglandin G/H synthase 2                                                  | 290  |
| MOL000910 | Germacron    | Sodium-dependent<br>noradrenaline transporter                                 | 540  |
| MOL000910 | Germacron    | Glutamate receptor 2                                                          | 921  |
| MOL000920 | LINALOOL (D) | Muscarinic acetylcholine<br>receptor M1                                       | 103  |
| MOL000920 | LINALOOL (D) | Gamma-aminobutyric-acid<br>receptor subunit alpha-2                           | 423  |
| MOL000920 | LINALOOL (D) | Muscarinic acetylcholine<br>receptor M2                                       | 617  |
| MOL000920 | LINALOOL (D) | Sodium-dependent<br>noradrenaline transporter                                 | 540  |
| MOL000920 | LINALOOL (D) | Gamma-aminobutyric-acid<br>receptor subunit alpha-5                           | 523  |
| MOL000920 | LINALOOL (D) | Gamma-aminobutyric-acid<br>receptor subunit alpha-3                           | 580  |
| MOL000920 | LINALOOL (D) | Gamma-aminobutyric-acid<br>receptor subunit alpha-6                           | 841  |
| MOL000920 | LINALOOL (D) | Prostaglandin G/H synthase 2                                                  | 290  |
| MOL000920 | LINALOOL (D) | Gamma-aminobutyric-acid<br>receptor subunit alpha-1                           | 872  |
| MOL000920 | LINALOOL (D) | Lysozyme                                                                      | 2300 |
| MOL000920 | LINALOOL (D) | Nicotinate-nucleotide--<br>dimethylbenzimidazole<br>phosphoribosyltransferase | 2264 |
| MOL000920 | LINALOOL (D) | Cytochrome P450-cam                                                           | 2298 |

|           |                                            |      |           |
|-----------|--------------------------------------------|------|-----------|
| MOL000920 | LINALOOL (D) Prostaglandin G/H synthase 1  | 20   |           |
|           | Muscarinic acetylcholine                   |      |           |
| MOL000920 | LINALOOL (D) receptor M3                   | 51   |           |
| MOL000920 | LINALOOL (D) Beta-1 adrenergic receptor    | 193  |           |
| MOL000920 | LINALOOL (D) Alpha-2A adrenergic receptor  | 318  |           |
|           | Retinoic acid receptor RXR-                |      |           |
| MOL000920 | LINALOOL (D) alpha                         | 459  |           |
| MOL000920 | LINALOOL (D) Alpha-1A adrenergic receptor  | 556  |           |
| MOL000920 | LINALOOL (D) Alpha-1B adrenergic receptor  | 632  |           |
|           | Sodium-dependent dopamine                  |      |           |
| MOL000920 | LINALOOL (D) transporter                   | 713  |           |
| MOL000920 | LINALOOL (D) Beta-2 adrenergic receptor    | 766  |           |
|           | Sodium-dependent serotonin                 |      |           |
| MOL000920 | LINALOOL (D) transporter                   | 824  |           |
| MOL000920 | LINALOOL (D) Leukotriene A-4 hydrolase     | 3060 |           |
|           | Amine oxidase [flavin-                     |      |           |
| MOL000920 | LINALOOL (D) containing] B                 | 3939 |           |
|           | cAMP-dependent protein                     |      |           |
| MOL000920 | LINALOOL (D) kinase inhibitor alpha        | 6264 |           |
|           | Nuclear receptor coactivator               |      |           |
| MOL000971 | Ethylpalmitate 2                           | 6241 |           |
| MOL001283 | C09704 Prostaglandin G/H synthase 2        | 290  |           |
|           | Nuclear receptor coactivator               |      |           |
| MOL001283 | C09704 2                                   | 6241 |           |
| MOL001393 | myristic acid Prostaglandin G/H synthase 1 | 20   |           |
| MOL001393 | myristic acid Prostaglandin G/H synthase 2 | 290  |           |
| MOL001393 | myristic acid Cholinesterase               | 3923 |           |
| MOL001393 | myristic acid Phospholipase A2             | 6500 |           |
| MOL001393 | myristic acid Genome polyprotein           | 6521 |           |
| MOL001393 | myristic acid Ig gamma-1 chain C region    | 4785 |           |
| MOL001393 | myristic acid Ferrichrome-iron receptor    | 2427 |           |
|           | 3-oxoacyl-[acyl-carrier-                   |      |           |
| MOL001393 | myristic acid protein] synthase 1          | 889  |           |
|           | Nuclear receptor coactivator               |      |           |
| MOL001393 | myristic acid 2                            | 6241 |           |
|           | Nuclear receptor coactivator               |      |           |
| MOL001393 | myristic acid 1                            | 6228 |           |
|           | Phosphatidylcholine-sterol                 |      |           |
| MOL001393 | myristic acid acyltransferase              | h001 | validated |
| MOL001417 | OCTENAL                                    |      |           |
| MOL001417 | OCTENAL                                    |      |           |
| MOL001417 | OCTENAL Trypsin-3                          | 2886 |           |
| MOL001494 | Mandenol Prostaglandin G/H synthase 1      | 20   |           |
| MOL001494 | Mandenol Prostaglandin G/H synthase 2      | 290  |           |

|           |                             |                              |      |
|-----------|-----------------------------|------------------------------|------|
|           |                             | Nuclear receptor coactivator |      |
| MOL001494 | Mandenol                    | 2                            | 6241 |
| MOL001501 | Daturic acid                | Prostaglandin G/H synthase 1 | 20   |
| MOL001501 | Daturic acid                | Ig gamma-1 chain C region    | 4785 |
|           |                             | Nuclear receptor coactivator |      |
| MOL001501 | Daturic acid                | 2                            | 6241 |
| MOL001641 | METHYL LINOLEATE            | Prostaglandin G/H synthase 1 | 20   |
| MOL001641 | METHYL LINOLEATE            | Prostaglandin G/H synthase 2 | 290  |
|           |                             | Nuclear receptor coactivator |      |
| MOL001641 | METHYL LINOLEATE            | 2                            | 6241 |
|           |                             | Retinoic acid receptor RXR-  |      |
| MOL001641 | METHYL LINOLEATE            | alpha                        | 459  |
| MOL001661 | Scandoside methyl ester     | Carbonic anhydrase 2         | 357  |
| MOL001662 | scandoside_qt               | Prostaglandin G/H synthase 1 | 20   |
| MOL001662 | scandoside_qt               | Prostaglandin G/H synthase 2 | 290  |
| MOL001662 | scandoside_qt               | Carbonic anhydrase 2         | 357  |
| MOL001662 | scandoside_qt               | Trypsin-1                    | 3176 |
| MOL001662 | scandoside_qt               | Glutamate receptor 2         | 921  |
|           | Deacetyl asperulosidic acid |                              |      |
| MOL001666 | methyl ester                | Carbonic anhydrase 2         | 357  |
|           | Deacetyl asperulosidic acid |                              |      |
| MOL001666 | methyl ester                | Trypsin-1                    | 3176 |
|           | deacetyl asperuloside       |                              |      |
| MOL001667 | acid_qt                     | Prostaglandin G/H synthase 1 | 20   |
|           | deacetyl asperuloside       |                              |      |
| MOL001667 | acid_qt                     | Prostaglandin G/H synthase 2 | 290  |
|           | deacetyl asperuloside       |                              |      |
| MOL001667 | acid_qt                     | Carbonic anhydrase 2         | 357  |
|           | deacetyl asperuloside       |                              |      |
| MOL001667 | acid_qt                     | Trypsin-1                    | 3176 |
|           | deacetyl asperuloside       |                              |      |
| MOL001667 | acid_qt                     | Glutamate receptor 2         | 921  |
| MOL001668 | Geniposidic acid            | Carbonic anhydrase 2         | 357  |
| MOL001668 | Geniposidic acid            | Prothrombin                  | 54   |
| MOL001669 | geniposidie acid_qt         | Prostaglandin G/H synthase 2 | 290  |
| MOL001669 | geniposidie acid_qt         | Carbonic anhydrase 2         | 357  |
|           |                             | Gamma-aminobutyric-acid      |      |
| MOL001669 | geniposidie acid_qt         | receptor subunit alpha-1     | 872  |
| MOL001669 | geniposidie acid_qt         | Trypsin-1                    | 3176 |
| MOL001669 | geniposidie acid_qt         | Glutamate receptor 2         | 921  |
| MOL001669 | geniposidie acid_qt         | Ig gamma-1 chain C region    | 4785 |
| MOL001739 | zoomaric acid               | Prostaglandin G/H synthase 1 | 20   |
| MOL001739 | zoomaric acid               | Prostaglandin G/H synthase 2 | 290  |
|           |                             | Nuclear receptor coactivator |      |
| MOL001739 | zoomaric acid               | 2                            | 6241 |



|           |                  |                                                                                |      |           |
|-----------|------------------|--------------------------------------------------------------------------------|------|-----------|
| MOL001745 | Methyl vaccenate | Nuclear receptor coactivator 2                                                 | 6241 |           |
| MOL001850 | Izoforon         | Gamma-aminobutyric-acid receptor subunit alpha-2                               | 423  |           |
| MOL001850 | Izoforon         | Gamma-aminobutyric-acid receptor subunit alpha-3                               | 580  |           |
| MOL001850 | Izoforon         | Gamma-aminobutyric-acid receptor subunit alpha-1                               | 872  |           |
| MOL001850 | Izoforon         | Cytochrome P450-cam                                                            | 2298 |           |
| MOL001850 | Izoforon         | Gamma-aminobutyric-acid receptor subunit alpha-6                               | 841  |           |
| MOL001942 | isoimperatorin   | Prostaglandin G/H synthase 2                                                   | 290  | validated |
| MOL002046 | hexanoic acid    |                                                                                |      |           |
| MOL002046 | hexanoic acid    | Trypsin-3                                                                      | 2886 |           |
| MOL002046 | hexanoic acid    | Bacillolysin                                                                   | 2457 |           |
| MOL002046 | hexanoic acid    | Inositol-3-phosphate synthase 1                                                | h001 | validated |
| MOL002203 | Exceparl M-OL    | Prostaglandin G/H synthase 1                                                   | 20   |           |
| MOL002203 | Exceparl M-OL    | Prostaglandin G/H synthase 2                                                   | 290  |           |
| MOL002203 | Exceparl M-OL    | Retinoic acid receptor RXR-alpha                                               | 459  |           |
| MOL002203 | Exceparl M-OL    | Nuclear receptor coactivator 2                                                 | 6241 |           |
| MOL002560 | chrysin          | Prostaglandin G/H synthase 1                                                   | 20   |           |
| MOL002560 | chrysin          | Androgen receptor                                                              | 146  |           |
| MOL002560 | chrysin          | Prostaglandin G/H synthase 2                                                   | 290  | validated |
| MOL002560 | chrysin          | cGMP-inhibited 3',5'-cyclic phosphodiesterase A                                | 485  |           |
| MOL002560 | chrysin          | Sodium-dependent serotonin transporter                                         | 824  |           |
| MOL002560 | chrysin          | Gamma-aminobutyric-acid receptor subunit alpha-1                               | 872  |           |
| MOL002560 | chrysin          | Dipeptidyl peptidase 4                                                         | 952  |           |
| MOL002560 | chrysin          | Heat shock protein HSP 90-alpha                                                | 1939 |           |
| MOL002560 | chrysin          | Phosphatidylinositol-4,5-bisphosphate 3-kinase catalytic subunit gamma isoform | 2404 |           |
| MOL002560 | chrysin          | Amine oxidase [flavin-containing] B                                            | 3939 |           |
| MOL002560 | chrysin          | cAMP-dependent protein kinase catalytic subunit alpha                          | 6263 |           |
| MOL002560 | chrysin          | cAMP-dependent protein kinase inhibitor alpha                                  | 6264 |           |
| MOL002560 | chrysin          | Prothrombin                                                                    | 54   |           |

|           |                                                        |                                                           |      |           |
|-----------|--------------------------------------------------------|-----------------------------------------------------------|------|-----------|
| MOL002560 | chrysin                                                | Cyclin-dependent kinase inhibitor 1                       | h001 | validated |
| MOL002560 | chrysin                                                | Transforming growth factor beta-1                         | h001 | validated |
| MOL002560 | chrysin                                                | Interleukin-4                                             | h001 | validated |
| MOL002560 | chrysin                                                | Cytochrome P450 19A1                                      | h001 | validated |
| MOL002560 | chrysin                                                | Interleukin-13                                            | h001 | validated |
| MOL002560 | chrysin                                                |                                                           |      | validated |
| MOL002883 | Ethyl oleate (NF)                                      | Nuclear receptor coactivator 2                            | 6241 |           |
| MOL003095 | 5-hydroxy-7-methoxy-2-(3,4,5-trimethoxyphenyl)chromone | Nitric oxide synthase, inducible                          | 7    |           |
| MOL003095 | 5-hydroxy-7-methoxy-2-(3,4,5-trimethoxyphenyl)chromone | Prostaglandin G/H synthase 1                              | 20   |           |
| MOL003095 | 5-hydroxy-7-methoxy-2-(3,4,5-trimethoxyphenyl)chromone | Prothrombin                                               | 54   |           |
| MOL003095 | 5-hydroxy-7-methoxy-2-(3,4,5-trimethoxyphenyl)chromone | Potassium voltage-gated channel subfamily H member 2      | 101  |           |
| MOL003095 | 5-hydroxy-7-methoxy-2-(3,4,5-trimethoxyphenyl)chromone | Estrogen receptor                                         | 136  |           |
| MOL003095 | 5-hydroxy-7-methoxy-2-(3,4,5-trimethoxyphenyl)chromone | Androgen receptor                                         | 146  |           |
| MOL003095 | 5-hydroxy-7-methoxy-2-(3,4,5-trimethoxyphenyl)chromone | Sodium channel protein type 5 subunit alpha               | 220  |           |
| MOL003095 | 5-hydroxy-7-methoxy-2-(3,4,5-trimethoxyphenyl)chromone | Peroxisome proliferator-activated receptor gamma          | 238  |           |
| MOL003095 | 5-hydroxy-7-methoxy-2-(3,4,5-trimethoxyphenyl)chromone | Coagulation factor X                                      | 239  |           |
| MOL003095 | 5-hydroxy-7-methoxy-2-(3,4,5-trimethoxyphenyl)chromone | Prostaglandin G/H synthase 2                              | 290  |           |
| MOL003095 | 5-hydroxy-7-methoxy-2-(3,4,5-trimethoxyphenyl)chromone | Nitric-oxide synthase, endothelial                        | 291  |           |
| MOL003095 | 5-hydroxy-7-methoxy-2-(3,4,5-trimethoxyphenyl)chromone | Voltage-dependent calcium channel subunit alpha-2/delta-1 | 762  |           |
| MOL003095 | 5-hydroxy-7-methoxy-2-(3,4,5-trimethoxyphenyl)chromone | DNA topoisomerase 2-alpha                                 | 817  |           |
| MOL003095 | 5-hydroxy-7-methoxy-2-(3,4,5-trimethoxyphenyl)chromone | Estrogen receptor beta                                    | 869  |           |

|           |                                                        |                                                                        |      |
|-----------|--------------------------------------------------------|------------------------------------------------------------------------|------|
| MOL003095 | 5-hydroxy-7-methoxy-2-(3,4,5-trimethoxyphenyl)chromone | Dipeptidyl peptidase 4                                                 | 952  |
| MOL003095 | 5-hydroxy-7-methoxy-2-(3,4,5-trimethoxyphenyl)chromone | Mitogen-activated protein kinase 14                                    | 1540 |
| MOL003095 | 5-hydroxy-7-methoxy-2-(3,4,5-trimethoxyphenyl)chromone | Glycogen synthase kinase-3 beta                                        | 1721 |
| MOL003095 | 5-hydroxy-7-methoxy-2-(3,4,5-trimethoxyphenyl)chromone | Heat shock protein HSP 90-alpha                                        | 1939 |
| MOL003095 | 5-hydroxy-7-methoxy-2-(3,4,5-trimethoxyphenyl)chromone | Serine/threonine-protein kinase Chk1                                   | 5790 |
| MOL003095 | 5-hydroxy-7-methoxy-2-(3,4,5-trimethoxyphenyl)chromone | Trypsin-1                                                              | 3176 |
| MOL003095 | 5-hydroxy-7-methoxy-2-(3,4,5-trimethoxyphenyl)chromone | Nuclear receptor coactivator 2                                         | 6241 |
| MOL003095 | 5-hydroxy-7-methoxy-2-(3,4,5-trimethoxyphenyl)chromone | Nuclear receptor coactivator 1                                         | 6228 |
| MOL003095 | 5-hydroxy-7-methoxy-2-(3,4,5-trimethoxyphenyl)chromone | Calcium-activated potassium channel subunit alpha 1                    | 610  |
| MOL003095 | 5-hydroxy-7-methoxy-2-(3,4,5-trimethoxyphenyl)chromone | Calmodulin                                                             | 465  |
| MOL003095 | 5-hydroxy-7-methoxy-2-(3,4,5-trimethoxyphenyl)chromone | Beta-2 adrenergic receptor                                             | 766  |
| MOL003095 | 5-hydroxy-7-methoxy-2-(3,4,5-trimethoxyphenyl)chromone | Beta-secretase 1                                                       | 1406 |
| MOL005840 | PANA                                                   | Prostaglandin G/H synthase 1                                           | 20   |
| MOL005840 | PANA                                                   | Prostaglandin G/H synthase 2                                           | 290  |
| MOL006219 | Clorius                                                | Lysozyme                                                               | 2300 |
| MOL006219 | Clorius                                                | Nicotinate-nucleotide--dimethylbenzimidazole phosphoribosyltransferase | 2264 |
| MOL006219 | Clorius                                                |                                                                        |      |

|           |                                                                                                                                                                                                                             |                                                                                           |      |
|-----------|-----------------------------------------------------------------------------------------------------------------------------------------------------------------------------------------------------------------------------|-------------------------------------------------------------------------------------------|------|
|           | methyl (1S, 4aS, 5R, 7S, 7aS)-<br>5, 7-dihydroxy-7-methyl-1-<br>[(2S, 3R, 4S, 5S, 6R)-3, 4, 5-<br>trihydroxy-6-<br>(hydroxymethyl)oxan-2-<br>yl]oxy-4a, 5, 6, 7a-<br>tetrahydro-1H-<br>cyclopenta[d]pyran-4-<br>carboxylate | Carbonic anhydrase 2                                                                      | 357  |
| MOL007147 | methyl (1S, 4aS, 5R, 7S, 7aS)-<br>5, 7-dihydroxy-7-methyl-1-<br>[(2S, 3R, 4S, 5S, 6R)-3, 4, 5-<br>trihydroxy-6-<br>(hydroxymethyl)oxan-2-<br>yl]oxy-4a, 5, 6, 7a-<br>tetrahydro-1H-<br>cyclopenta[d]pyran-4-<br>carboxylate | Dipeptidyl peptidase 4                                                                    | 952  |
| MOL007148 | shanzhiside methyl ester_qt                                                                                                                                                                                                 | Prostaglandin G/H synthase 2                                                              | 290  |
| MOL007148 | shanzhiside methyl ester_qt                                                                                                                                                                                                 | Carbonic anhydrase 2                                                                      | 357  |
| MOL007148 | shanzhiside methyl ester_qt                                                                                                                                                                                                 | Trypsin-1                                                                                 | 3176 |
| MOL007148 | shanzhiside methyl ester_qt                                                                                                                                                                                                 | Glutamate receptor 2                                                                      | 921  |
| MOL007244 | 3, 4-di-o-caffeoylquinic<br>acid                                                                                                                                                                                            | Coagulation factor X                                                                      | 239  |
| MOL007244 | 3, 4-di-o-caffeoylquinic<br>acid                                                                                                                                                                                            | Tyrosine-protein phosphatase<br>non-receptor type 1                                       | 687  |
| MOL007245 | 3-Methylkempferol                                                                                                                                                                                                           | Nitric oxide synthase,<br>inducible                                                       | 7    |
| MOL007245 | 3-Methylkempferol                                                                                                                                                                                                           | Prostaglandin G/H synthase 1                                                              | 20   |
| MOL007245 | 3-Methylkempferol                                                                                                                                                                                                           | Androgen receptor                                                                         | 146  |
| MOL007245 | 3-Methylkempferol                                                                                                                                                                                                           | Prostaglandin G/H synthase 2                                                              | 290  |
| MOL007245 | 3-Methylkempferol                                                                                                                                                                                                           | Dipeptidyl peptidase 4                                                                    | 952  |
| MOL007245 | 3-Methylkempferol                                                                                                                                                                                                           | Mitogen-activated protein<br>kinase 14                                                    | 1540 |
| MOL007245 | 3-Methylkempferol                                                                                                                                                                                                           | Glycogen synthase kinase-3<br>beta                                                        | 1721 |
| MOL007245 | 3-Methylkempferol                                                                                                                                                                                                           | Heat shock protein HSP 90-<br>alpha                                                       | 1939 |
| MOL007245 | 3-Methylkempferol                                                                                                                                                                                                           | Cell division protein kinase<br>2                                                         | 2240 |
| MOL007245 | 3-Methylkempferol                                                                                                                                                                                                           | Phosphatidylinositol-4, 5-<br>bisphosphate 3-kinase<br>catalytic subunit gamma<br>isoform | 2404 |
| MOL007245 | 3-Methylkempferol                                                                                                                                                                                                           | cAMP-dependent protein<br>kinase catalytic subunit<br>alpha                               | 6263 |
| MOL009547 | desacetyl asperulosidic<br>acid                                                                                                                                                                                             | Carbonic anhydrase 2                                                                      | 357  |

|           |                                    |                              |      |
|-----------|------------------------------------|------------------------------|------|
| MOL009548 | desacetyl asperulosidic<br>acid_qt | Prostaglandin G/H synthase 2 | 290  |
| MOL009548 | desacetyl asperulosidic<br>acid_qt | Carbonic anhydrase 2         | 357  |
| MOL009548 | desacetyl asperulosidic<br>acid_qt | Trypsin-1                    | 3176 |
| MOL009548 | desacetyl asperulosidic<br>acid_qt | Glutamate receptor 2         | 921  |
