# Supplementary material for: The Study of Yin-Chen-Hao-Tang Preventing and Treating Alcoholic Fatty Liver Disease through PPAR Signaling Pathway Based on Network Pharmacology and RNA-Seq Transcriptomics
Source: Hindawi journal article supplement (doi:10.1155/2021/8917993), 2021-12-31
Supplement: f1 [file 8917993.f1.zip]

| Mol ID    | Molecule Name       | Target Name                                         | drugbank | Status |
|-----------|---------------------|-----------------------------------------------------|----------|--------|
| MOL000118 | Terpineol           | M3                                                  | 51       |        |
| MOL000118 | Terpineol           | M1                                                  | 103      |        |
| MOL000118 | (L)-alpha-Terpineol | Gamma-aminobutyric-acid receptor subunit alpha-2    | 423      |        |
| MOL000118 | (L)-alpha-Terpineol | Gamma-aminobutyric-acid receptor subunit alpha-5    | 523      |        |
| MOL000118 | (L)-alpha-Terpineol | Sodium-dependent noradrenaline transporter          | 540      |        |
| MOL000118 | (L)-alpha-Terpineol | Gamma-aminobutyric-acid receptor subunit alpha-3    | 580      |        |
| MOL000118 | Terpineol           | M2                                                  | 617      |        |
| MOL000118 | Terpineol           | Alpha-1B adrenergic receptor                        | 632      |        |
| MOL000118 | Terpineol           | transporter                                         | 713      |        |
| MOL000118 | (L)-alpha-Terpineol | Gamma-aminobutyric-acid receptor subunit alpha-1    | 872      |        |
| MOL000118 | (L)-alpha-Terpineol | Gamma-aminobutyric-acid receptor subunit alpha-6    | 841      |        |
| MOL000118 | Terpineol           | Prostaglandin G/H synthase 1                        | 20       |        |
| MOL000118 | (L)-alpha-Terpineol | Sodium channel protein type 5 subunit alpha         | 220      |        |
| MOL000118 | Terpineol           | Coagulation factor X                                | 239      |        |
| MOL000118 | Terpineol           | Prostaglandin G/H synthase 2                        | 290      |        |
| MOL000118 | Terpineol           | DNA topoisomerase 2-alpha                           | 817      |        |
| MOL000118 | Terpineol           | Heat shock protein HSP 90-alpha                     | 1939     |        |
| MOL000118 | Terpineol           | Nuclear receptor coactivator 2                      | 6241     |        |
| MOL000118 | (L)-alpha-Terpineol | Calcium-activated potassium channel subunit alpha 1 | 610      |        |
| MOL000118 | Terpineol           | Cytochrome P450-cam                                 | 2298     |        |
| MOL000118 | Terpineol           | Alpha-1A adrenergic receptor                        | 556      |        |
| MOL000118 | Terpineol           | Ig gamma-1 chain C region                           | 4785     |        |
| MOL000126 | (-)-nopinene        | Gamma-aminobutyric-acid receptor subunit alpha-2    | 423      |        |
| MOL000126 | (-)-nopinene        | Gamma-aminobutyric-acid receptor subunit alpha-1    | 872      |        |
| MOL000126 | (-)-nopinene        | Cytochrome P450-cam                                 | 2298     |        |
| MOL000126 | (-)-nopinene        | Prostaglandin G/H synthase 1                        | 20       |        |
| MOL000126 | (-)-nopinene        | M3                                                  | 51       |        |
| MOL000126 | (-)-nopinene        | M1                                                  | 103      |        |
| MOL000126 | (-)-nopinene        | Prostaglandin G/H synthase 2                        | 290      |        |
| MOL000126 | (-)-nopinene        | Retinoic acid receptor RXR-alpha                    | 459      |        |
| MOL000126 | (-)-nopinene        | Sodium-dependent noradrenaline transporter          | 540      |        |
| MOL000126 | (-)-nopinene        | Gamma-aminobutyric-acid receptor subunit alpha-3    | 580      |        |
| MOL000126 | (-)-nopinene        | M2                                                  | 617      |        |
| MOL000126 | (-)-nopinene        | Alpha-1B adrenergic receptor                        | 632      |        |
| MOL000126 | (-)-nopinene        | Nuclear receptor coactivator 2                      | 6241     |        |
| MOL000126 | (-)-nopinene        | Gamma-aminobutyric-acid receptor subunit alpha-6    | 841      |        |
| MOL000126 | (-)-nopinene        | Alpha-2C adrenergic receptor                        | 378      |        |
| MOL000126 | (-)-nopinene        | Alpha-1A adrenergic receptor                        | 556      |        |
| MOL000126 | (-)-nopinene        | transporter                                         | 713      |        |

|           |                |                                     |      |           |
|-----------|----------------|-------------------------------------|------|-----------|
| MOL000126 | (-)-nopinene   | Amine oxidase [flavin-containing] A | 3941 |           |
| MOL000126 | (-)-nopinene   | Lysozyme                            | 2300 |           |
|           |                | Gamma-aminobutyric-acid receptor    |      |           |
| MOL000126 | (-)-nopinene   | subunit alpha-5                     | 523  |           |
|           |                | Neuronal acetylcholine receptor     |      |           |
| MOL000126 | (-)-nopinene   | subunit alpha-2                     | 813  |           |
| MOL000172 | Furol          |                                     |      |           |
| MOL000172 | Furol          |                                     |      |           |
| MOL000172 | Furol          |                                     |      |           |
| MOL000172 | Furol          | Lysozyme                            | 2300 |           |
|           |                | Nicotinate-nucleotide--             |      |           |
|           |                | dimethylbenzimidazole               |      |           |
| MOL000172 | Furol          | phosphoribosyltransferase           | 2264 |           |
| MOL001801 | salicylic acid | Prostaglandin G/H synthase 1        | 20   |           |
| MOL001801 | salicylic acid | Prostaglandin G/H synthase 2        | 290  |           |
| MOL001801 | salicylic acid | Amine oxidase [flavin-containing] B | 3939 |           |
| MOL001801 | salicylic acid |                                     |      |           |
| MOL001801 | salicylic acid |                                     |      |           |
| MOL001801 | salicylic acid | Lysozyme                            | 2300 |           |
|           |                | Nicotinate-nucleotide--             |      |           |
|           |                | dimethylbenzimidazole               |      |           |
| MOL001801 | salicylic acid | phosphoribosyltransferase           | 2264 |           |
| MOL001801 | salicylic acid | Trypsin-3                           | 2886 |           |
| MOL001801 | salicylic acid | Arachidonate 5-lipoxygenase         | 275  | validated |
| MOL001801 | salicylic acid |                                     |      |           |
| MOL001801 | salicylic acid | Chymotrypsinogen B                  | 6011 |           |
| MOL001801 | salicylic acid | Transcription factor p65            | h001 | validated |
| MOL001801 | salicylic acid | Fatty acid synthase                 | 1295 | validated |
| MOL001801 | salicylic acid | Superoxide dismutase [Cu-Zn]        | 4152 | validated |
| MOL001801 | salicylic acid |                                     |      | validated |
| MOL001801 | salicylic acid | Endothelin-1                        | h001 | validated |
| MOL001801 | salicylic acid | Interleukin-4                       | h001 | validated |
| MOL001801 | salicylic acid | Neutrophil cytosol factor 1         | h001 | validated |
| MOL001801 | salicylic acid | Serum paraoxonase/arylesterase 1    | 1198 | validated |
| MOL001801 | salicylic acid | Apolipoprotein A-I                  | h001 | validated |
| MOL001801 | salicylic acid | Plasminogen                         | 234  | validated |
| MOL001801 | salicylic acid | subunit                             | 1787 | validated |
| MOL001801 | salicylic acid | Ferritin, mitochondrial             | h001 | validated |
| MOL001801 | salicylic acid | 6-phosphofructokinase, muscle type  | h001 | validated |
| MOL001801 | salicylic acid | C1                                  | 139  | validated |
| MOL001801 | salicylic acid | Thyroid peroxidase                  | 563  | validated |
| MOL001801 | salicylic acid | Beta-glucuronidase                  | 1354 | validated |
|           |                | Hairy/enhancer-of-split related     |      |           |
| MOL001801 | salicylic acid | with YRPW motif protein 1           | h001 | validated |
|           |                | Prolow-density lipoprotein          |      |           |
| MOL001801 | salicylic acid | receptor-related protein 1          | h001 | validated |
| MOL001801 | salicylic acid | Tyrosine aminotransferase           | 5493 | validated |
|           |                | Golgi-associated plant              |      |           |
| MOL001801 | salicylic acid | pathogenesis-related protein 1      | 5369 | validated |
| MOL001801 | salicylic acid | Membrane primary amine oxidase      | h001 | validated |
| MOL001801 | salicylic acid | Telomeric repeat-binding factor 1   | h001 | validated |
| MOL001880 | OXL            | Prostaglandin G/H synthase 1        | 20   |           |

|           |     |                                     |      |
|-----------|-----|-------------------------------------|------|
| MOL001880 | OXL | Nitric-oxide synthase, brain        | 76   |
| MOL001880 | OXL | Procollagen-lysine, 2-oxoglutarate  |      |
| MOL001880 | OXL | 5-dioxygenase 1                     | 97   |
| MOL001880 | OXL | mitochondrial                       | 147  |
| MOL001880 | OXL | Succinate semialdehyde              |      |
| MOL001880 | OXL | dehydrogenase, mitochondrial        | 170  |
| MOL001880 | OXL | 4-aminobutyrate aminotransferase,   |      |
| MOL001880 | OXL | mitochondrial                       | 280  |
| MOL001880 | OXL | Prostaglandin G/H synthase 2        | 290  |
| MOL001880 | OXL | Serine hydroxymethyltransferase,    |      |
| MOL001880 | OXL | mitochondrial                       | 321  |
| MOL001880 | OXL | DNA polymerase                      | 338  |
| MOL001880 | OXL | Glutamate [NMDA] receptor subunit   |      |
| MOL001880 | OXL | zeta-1                              | 401  |
| MOL001880 | OXL | Kynureninase                        | 435  |
| MOL001880 | OXL | Ornithine aminotransferase,         |      |
| MOL001880 | OXL | mitochondrial                       | 472  |
| MOL001880 | OXL | Glycine receptor subunit alpha-1    | 482  |
| MOL001880 | OXL | Aspartate aminotransferase,         |      |
| MOL001880 | OXL | cytoplasmic                         | 586  |
| MOL001880 | OXL | Glutamate [NMDA] receptor subunit   |      |
| MOL001880 | OXL | epsilon-1                           | 837  |
| MOL001880 | OXL | Gamma-aminobutyric-acid receptor    |      |
| MOL001880 | OXL | subunit alpha-1                     | 872  |
| MOL001880 | OXL | Proto-oncogene tyrosine-protein     |      |
| MOL001880 | OXL | kinase Src                          | 933  |
| MOL001880 | OXL | Cathepsin D                         | 1243 |
| MOL001880 | OXL | Lactotransferrin                    | 1439 |
| MOL001880 | OXL | Macrophage metalloelastase          | 2203 |
| MOL001880 | OXL | Leukotriene A-4 hydrolase           | 3060 |
| MOL001880 | OXL | M-phase inducer phosphatase 2       | 3105 |
| MOL001880 | OXL | cytoplasmic                         | 3610 |
| MOL001880 | OXL | Cholinesterase                      | 3923 |
| MOL001880 | OXL | Xanthine dehydrogenase/oxidase      | 3947 |
| MOL001880 | OXL |                                     |      |
| MOL001880 | OXL | Monocarboxylate transporter 2       | 489  |
| MOL001880 | OXL | Cytochrome P450-cam                 | 2298 |
| MOL001880 | OXL | Aspartate aminotransferase          | 2249 |
| MOL001880 | OXL | Beta-galactosidase                  | 2592 |
| MOL001880 | OXL | Ferrichrome-iron receptor           | 2427 |
| MOL001880 | OXL | Histidinol dehydrogenase            | 3191 |
| MOL001880 | OXL | Pyruvate dehydrogenase [cytochrome] | 845  |
| MOL001880 | OXL | Acetyl-CoA acetyltransferase        | 2596 |
| MOL001880 | OXL | Formate dehydrogenase H             | 2638 |
| MOL001880 | OXL | Formate acetyltransferase 1         | 3178 |

|           |     |                                     |      |
|-----------|-----|-------------------------------------|------|
| MOL001880 | OXL | Adenylosuccinate synthetase         | 2632 |
|           |     | Succinate dehydrogenase             |      |
| MOL001880 | OXL | flavoprotein subunit                | 5725 |
| MOL001880 | OXL | Alanine racemase                    | 2453 |
| MOL001880 | OXL | Gag-Pol polyprotein                 | 2237 |
| MOL001880 | OXL | Methionine synthase                 | 2935 |
|           |     | C4-dicarboxylate transport          |      |
|           |     | transcriptional regulatory protein  |      |
| MOL001880 | OXL | dctD                                | 3336 |
| MOL001880 | OXL | D-alanyl-D-alanine carboxypeptidase | 2461 |
| MOL001880 | OXL | Isocitrate dehydrogenase [NADP]     | 2286 |
|           |     | Phosphoenolpyruvate carboxykinase   |      |
| MOL001880 | OXL | [ATP]                               | 4794 |
| MOL001880 | OXL | Siroheme synthase                   | 4318 |
| MOL001880 | OXL | Aconitate hydratase 2               | 3553 |
| MOL001880 | OXL | Monomeric sarcosine oxidase         | 2380 |
| MOL001880 | OXL | Bacillolysin                        | 2457 |
| MOL001880 | OXL | Dihydroxyacetone kinase             | 2397 |
| MOL001880 | OXL | Haloalkane dehalogenase             | 2281 |
| MOL001880 | OXL | dehydrogenase                       | 2881 |
|           |     | Fumarate reductase flavoprotein     |      |
| MOL001880 | OXL | subunit                             | 2709 |
| MOL001880 | OXL | 2-isopropylmalate synthase          | 3179 |
|           |     | 1-aminocyclopropane-1-carboxylate   |      |
| MOL001880 | OXL | deaminase                           | 2518 |
| MOL001880 | OXL | Hydroxylamine reductase             | 3274 |
|           |     | Nicotinate-nucleotide--             |      |
|           |     | dimethylbenzimidazole               |      |
| MOL001880 | OXL | phosphoribosyltransferase           | 2264 |
| MOL001880 | OXL | Glucose--fructose oxidoreductase    | 2826 |
| MOL001880 | OXL | Growth-inhibiting protein 18        | 3877 |
| MOL001880 | OXL |                                     |      |
| MOL001880 | OXL |                                     |      |
|           |     | Methylmalonyl-CoA                   |      |
| MOL001880 | OXL | carboxyltransferase 5S subunit      | 2983 |
| MOL001880 | OXL | L-cysteine/cystine lyase C-DES      | 4802 |
| MOL001880 | OXL | Malonamidase E2                     | 4600 |
| MOL001880 | OXL | Serotransferrin                     | 566  |
|           |     | Glutamate dehydrogenase 1,          |      |
| MOL001880 | OXL | mitochondrial                       | 201  |
|           |     | Aspartate aminotransferase,         |      |
| MOL001880 | OXL | mitochondrial                       | 426  |
| MOL001880 | OXL | Pyruvate kinase isozymes M1/M2      | 98   |
| MOL001880 | OXL | Serine--pyruvate aminotransferase   | 349  |
| MOL001880 | OXL | Monocarboxylate transporter 7       | 195  |
| MOL001880 | OXL | Alanine aminotransferase 1          | 735  |
|           |     | Aldehyde dehydrogenase X,           |      |
| MOL001880 | OXL | mitochondrial                       | 531  |
|           |     | Succinate dehydrogenase             |      |
| MOL001880 | OXL | [ubiquinone] flavoprotein subunit,  | 197  |
| MOL001880 | OXL | Cystathionine gamma-lyase           | 868  |

|           |     |                                                                            |      |
|-----------|-----|----------------------------------------------------------------------------|------|
| MOL001880 | OXL | Serine hydroxymethyltransferase,<br>cytosolic                              | 367  |
| MOL001880 | OXL | Betaine--homocysteine S-<br>methyltransferase 1                            | 941  |
| MOL001880 | OXL | Succinyl-CoA:3-ketoacid-coenzyme A<br>transferase 2, mitochondrial         | 4008 |
| MOL001880 | OXL | Alanine--glyoxylate<br>aminotransferase 2, mitochondrial                   | 114  |
| MOL001880 | OXL | NADP-dependent malic enzyme<br>Glutamate dehydrogenase 2,<br>mitochondrial | 666  |
| MOL001880 | OXL | Alanyl-tRNA synthetase, cytoplasmic                                        | 323  |
| MOL001880 | OXL | Glycine amidinotransferase,<br>mitochondrial                               | 383  |
| MOL001880 | OXL | Calcium-transporting ATPase type 2C<br>member 1                            | 241  |
| MOL001880 | OXL | S-adenosylmethionine synthetase<br>isoform type-1                          | 453  |
| MOL001880 | OXL | Cysteine desulfurase, mitochondrial                                        | 169  |
| MOL001880 | OXL | Alanine--glyoxylate<br>aminotransferase 2-like 2                           | 3899 |
| MOL001880 | OXL | Proton-coupled amino acid<br>transporter 1                                 | 593  |
| MOL001880 | OXL | 1                                                                          | 3978 |
| MOL001880 | OXL | L-lactate dehydrogenase A chain                                            | 473  |
| MOL001880 | OXL | Glycine receptor subunit alpha-2                                           | 820  |
| MOL001880 | OXL | 2-amino-3-ketobutyrate coenzyme A<br>ligase, mitochondrial                 | 575  |
| MOL001880 | OXL | Pyruvate dehydrogenase E1 component<br>subunit beta, mitochondrial         | 110  |
| MOL001880 | OXL | Triosephosphate isomerase                                                  | 6346 |
| MOL001880 | OXL | Delta-1-pyrroline-5-carboxylate<br>dehydrogenase, mitochondrial            | 271  |
| MOL001880 | OXL | NAD-dependent malic enzyme,<br>mitochondrial                               | 166  |
| MOL001880 | OXL | Glycine receptor subunit alpha-3                                           | 461  |
| MOL001880 | OXL | SHMT2 protein                                                              | 3884 |
| MOL001880 | OXL | NADP-dependent malic enzyme,<br>mitochondrial                              | 363  |
| MOL001880 | OXL | L-lactate dehydrogenase B chain                                            | 77   |
| MOL001880 | OXL | Trypsin-3                                                                  | 2886 |
| MOL001880 | OXL | Sigma factor sigB regulation<br>protein rsbQ                               | 3490 |
| MOL001880 | OXL | aminotransferase                                                           | 2537 |
| MOL001880 | OXL | Aldose reductase                                                           | 822  |
| MOL001880 | OXL | Glycogen phosphorylase, muscle form                                        | 1152 |
| MOL001880 | OXL | Fumarate hydratase class II                                                | 3486 |
| MOL001880 | OXL | N-acetylneuraminate lyase                                                  | 3000 |
| MOL001880 | OXL | Phosphate-binding protein pstS<br>precursor                                | 3694 |
| MOL001880 | OXL | Beta-amylase                                                               | 3365 |
| MOL001880 | OXL | Tyrosine-protein kinase<br>transforming protein Src                        | 2556 |

|           |               |                                     |      |           |
|-----------|---------------|-------------------------------------|------|-----------|
|           |               | 2-hydroxy-6-oxo-7-methylocta-2,4-   |      |           |
| MOL001880 | OXL           | dienoate hydrolase                  | 4674 |           |
| MOL001880 | OXL           | Phosphotriesterase                  | 5742 |           |
|           |               | NADH-ubiquinone oxidoreductase 75   |      |           |
| MOL001880 | OXL           | kDa subunit, mitochondrial          | 548  |           |
| MOL001880 | OXL           | Gephyrin                            | 4532 |           |
|           |               | Succinyl-CoA:3-ketoacid-coenzyme A  |      |           |
| MOL001880 | OXL           | transferase 1, mitochondrial        | 4003 |           |
| MOL001880 | OXL           | 2                                   | 4000 |           |
|           |               | Calcium-binding mitochondrial       |      |           |
| MOL001880 | OXL           | carrier protein Aralar2             | 513  |           |
|           |               | Succinyl-CoA ligase [ADP-forming]   |      |           |
| MOL001880 | OXL           | beta-chain, mitochondrial           | 4009 |           |
| MOL001999 | scoparone     | Prostaglandin G/H synthase 1        | 20   |           |
| MOL001999 | scoparone     | Prothrombin                         | 54   |           |
| MOL001999 | scoparone     | M1                                  | 103  |           |
| MOL001999 | scoparone     | Prostaglandin G/H synthase 2        | 290  |           |
| MOL001999 | scoparone     | Beta-2 adrenergic receptor          | 766  |           |
| MOL001999 | scoparone     | transporter                         | 824  |           |
|           |               | Gamma-aminobutyric-acid receptor    |      |           |
| MOL001999 | scoparone     | subunit alpha-1                     | 872  |           |
| MOL001999 | scoparone     | Leukotriene A-4 hydrolase           | 3060 |           |
| MOL001999 | scoparone     | Amine oxidase [flavin-containing] B | 3939 |           |
|           |               | cAMP-dependent protein kinase       |      |           |
| MOL001999 | scoparone     | catalytic subunit alpha             | 6263 |           |
| MOL001999 | scoparone     | Glutamate receptor 2                | 921  |           |
|           |               | cAMP-dependent protein kinase       |      |           |
| MOL001999 | scoparone     | inhibitor alpha                     | 6264 |           |
| MOL001999 | scoparone     | Transcription factor p65            | h001 | validated |
| MOL001999 | scoparone     | NF-kappa-B inhibitor alpha          | h001 | validated |
| MOL001999 | scoparone     | Small inducible cytokine A2         | 1649 | validated |
| MOL001999 | scoparone     | Interleukin-8                       | h001 | validated |
| MOL001999 | scoparone     | Tyrosinase                          | h001 | validated |
|           |               | 5,6-dihydroxyindole-2-carboxylic    |      |           |
| MOL001999 | scoparone     | acid oxidase                        | h001 | validated |
| MOL001999 | scoparone     | L-dopachrome tautomerase            | h001 | validated |
| MOL000207 | Methyleugenol | Prostaglandin G/H synthase 1        | 20   |           |
| MOL000207 | Methyleugenol | D(1A) dopamine receptor             | 23   |           |
| MOL000207 | Methyleugenol | M3                                  | 51   |           |
| MOL000207 | Methyleugenol | M1                                  | 103  |           |
| MOL000207 | Methyleugenol | Beta-1 adrenergic receptor          | 193  |           |
|           |               | Sodium channel protein type 5       |      |           |
| MOL000207 | Methyleugenol | subunit alpha                       | 220  |           |
| MOL000207 | Methyleugenol | Prostaglandin G/H synthase 2        | 290  |           |
| MOL000207 | Methyleugenol | Nitric-oxide synthase, endothelial  | 291  |           |
| MOL000207 | Methyleugenol | Alpha-2A adrenergic receptor        | 318  |           |
| MOL000207 | Methyleugenol | Alpha-2C adrenergic receptor        | 378  |           |
| MOL000207 | Methyleugenol | 5-hydroxytryptamine 2A receptor     | 502  |           |
|           |               | Sodium-dependent noradrenaline      |      |           |
| MOL000207 | Methyleugenol | transporter                         | 540  |           |
| MOL000207 | Methyleugenol | Alpha-1A adrenergic receptor        | 556  |           |
| MOL000207 | Methyleugenol | M2                                  | 617  |           |

|           |               |                                     |      |           |
|-----------|---------------|-------------------------------------|------|-----------|
| MOL000207 | Methyleugenol | Alpha-2B adrenergic receptor        | 629  |           |
| MOL000207 | Methyleugenol | Alpha-1B adrenergic receptor        | 632  |           |
| MOL000207 | Methyleugenol | transporter                         | 713  |           |
| MOL000207 | Methyleugenol | Beta-2 adrenergic receptor          | 766  |           |
| MOL000207 | Methyleugenol | Alpha-1D adrenergic receptor        | 789  |           |
| MOL000207 | Methyleugenol | Beta-lactamase                      | 2478 |           |
| MOL000207 | Methyleugenol | Amine oxidase [flavin-containing] B | 3939 |           |
| MOL000207 | Methyleugenol | Leukotriene A-4 hydrolase           | 3060 |           |
| MOL000207 | Methyleugenol | transporter                         | 824  |           |
| MOL000207 | Methyleugenol | activator                           | 1074 |           |
|           |               | cAMP-dependent protein kinase       |      |           |
| MOL000207 | Methyleugenol | inhibitor alpha                     | 6264 |           |
| MOL000251 | Rhamnocitrin  | Nitric oxide synthase, inducible    | 7    |           |
| MOL000251 | Rhamnocitrin  | Prostaglandin G/H synthase 1        | 20   |           |
| MOL000251 | Rhamnocitrin  | Estrogen receptor                   | 136  |           |
| MOL000251 | Rhamnocitrin  | Androgen receptor                   | 146  |           |
|           |               | Peroxisome proliferator-activated   |      |           |
| MOL000251 | Rhamnocitrin  | receptor gamma                      | 238  |           |
| MOL000251 | Rhamnocitrin  | Prostaglandin G/H synthase 2        | 290  |           |
| MOL000251 | Rhamnocitrin  | Estrogen receptor beta              | 869  |           |
| MOL000251 | Rhamnocitrin  | Dipeptidyl peptidase 4              | 952  |           |
| MOL000251 | Rhamnocitrin  | Mitogen-activated protein kinase 14 | 1540 |           |
| MOL000251 | Rhamnocitrin  | Glycogen synthase kinase-3 beta     | 1721 |           |
| MOL000251 | Rhamnocitrin  | Heat shock protein HSP 90-alpha     | 1939 |           |
| MOL000251 | Rhamnocitrin  | Cell division protein kinase 2      | 2240 |           |
|           |               | Phosphatidylinositol-4,5-           |      |           |
|           |               | bisphosphate 3-kinase catalytic     |      |           |
| MOL000251 | Rhamnocitrin  | subunit gamma isoform               | 2404 |           |
| MOL000251 | Rhamnocitrin  | Chk1                                | 5790 |           |
|           |               | cAMP-dependent protein kinase       |      |           |
| MOL000251 | Rhamnocitrin  | catalytic subunit alpha             | 6263 |           |
| MOL000251 | Rhamnocitrin  | Trypsin-1                           | 3176 |           |
| MOL000251 | Rhamnocitrin  | Calmodulin                          | 465  |           |
| MOL000251 | Rhamnocitrin  | Nuclear receptor coactivator 2      | 6241 |           |
| MOL000251 | Rhamnocitrin  | Aldose reductase                    | 822  |           |
| MOL000254 | eugenol       | Prostaglandin G/H synthase 1        | 20   |           |
| MOL000254 | eugenol       | D(1A) dopamine receptor             | 23   |           |
| MOL000254 | eugenol       | M3                                  | 51   |           |
| MOL000254 | eugenol       | M1                                  | 103  |           |
| MOL000254 | eugenol       | Beta-1 adrenergic receptor          | 193  |           |
| MOL000254 | eugenol       | Prostaglandin G/H synthase 2        | 290  | validated |
| MOL000254 | eugenol       | Nitric-oxide synthase, endothelial  | 291  |           |
| MOL000254 | eugenol       | Alpha-2A adrenergic receptor        | 318  |           |
| MOL000254 | eugenol       | Alpha-2C adrenergic receptor        | 378  |           |
|           |               | Sodium-dependent noradrenaline      |      |           |
| MOL000254 | eugenol       | transporter                         | 540  |           |
| MOL000254 | eugenol       | Alpha-1A adrenergic receptor        | 556  |           |
| MOL000254 | eugenol       | M2                                  | 617  |           |
| MOL000254 | eugenol       | Alpha-1B adrenergic receptor        | 632  |           |
| MOL000254 | eugenol       | transporter                         | 713  |           |
| MOL000254 | eugenol       | Beta-2 adrenergic receptor          | 766  |           |
| MOL000254 | eugenol       | Beta-lactamase                      | 2478 |           |

|           |               |                                     |      |           |
|-----------|---------------|-------------------------------------|------|-----------|
| MOL000254 | eugenol       | Amine oxidase [flavin-containing] B | 3939 | validated |
| MOL000254 | eugenol       | Amine oxidase [flavin-containing] A | 3941 | validated |
| MOL000254 | eugenol       | Lysozyme                            | 2300 |           |
| MOL000254 | eugenol       | Chymotrypsinogen B                  | 6011 |           |
| MOL000254 | eugenol       | Alpha-1D adrenergic receptor        | 789  |           |
| MOL000254 | eugenol       | Leukotriene A-4 hydrolase           | 3060 |           |
| MOL000254 | eugenol       | Alpha-2B adrenergic receptor        | 629  |           |
| MOL000254 | eugenol       | activator                           | 1074 |           |
| MOL000254 | eugenol       | Thermolysin                         | 6285 |           |
|           |               | Sodium channel protein type 5       |      |           |
| MOL000254 | eugenol       | subunit alpha                       | 220  |           |
| MOL000254 | eugenol       | Transcription factor p65            | h001 | validated |
| MOL000254 | eugenol       | Cytochrome P450 1A1                 | h001 | validated |
| MOL000254 | eugenol       | Cytochrome P450 1B1                 | h001 | validated |
| MOL000254 | eugenol       | Arachidonate 5-lipoxygenase         | 275  | validated |
| MOL000254 | eugenol       | Aryl hydrocarbon receptor           | 6220 | validated |
|           |               | Canalicular multispecific organic   |      |           |
| MOL000254 | eugenol       | anion transporter 1                 | h001 | validated |
| MOL000254 | eugenol       | CD86                                | 942  | validated |
|           |               | Serine/threonine-protein            |      |           |
| MOL000254 | eugenol       | phosphatase 2B catalytic subunit    | 6746 | validated |
| MOL000254 | eugenol       | Pepsin A                            | 6231 | validated |
| MOL000254 | eugenol       | Mucin-1                             | h001 | validated |
| MOL000254 | eugenol       | Quinone oxidoreductase              | 2159 | validated |
|           |               | Calcium-transporting ATPase type 2C |      |           |
| MOL000254 | eugenol       | member 1                            | 241  | validated |
|           |               | Short transient receptor potential  |      |           |
| MOL000254 | eugenol       | channel 3                           | h001 | validated |
|           |               | Transient receptor potential cation |      |           |
| MOL000254 | eugenol       | channel subfamily V member 3        | 5838 | validated |
| MOL000254 | eugenol       | 2                                   | h001 | validated |
| MOL002818 | Piceol        |                                     |      |           |
| MOL002818 | Piceol        | Lysozyme                            | 2300 |           |
|           |               | Nicotinate-nucleotide--             |      |           |
|           |               | dimethylbenzimidazole               |      |           |
| MOL002818 | Piceol        | phosphoribosyltransferase           | 2264 |           |
| MOL002818 | Piceol        |                                     |      |           |
| MOL000339 | Isoscopoletin | Prostaglandin G/H synthase 1        | 20   |           |
| MOL000339 | Isoscopoletin | D(1A) dopamine receptor             | 23   |           |
| MOL000339 | Isoscopoletin | Prothrombin                         | 54   |           |
| MOL000339 | Isoscopoletin | M1                                  | 103  |           |
| MOL000339 | Isoscopoletin | Prostaglandin G/H synthase 2        | 290  |           |
| MOL000339 | Isoscopoletin | Beta-2 adrenergic receptor          | 766  |           |
| MOL000339 | Isoscopoletin | Leukotriene A-4 hydrolase           | 3060 |           |
| MOL000339 | Isoscopoletin | Amine oxidase [flavin-containing] B | 3939 |           |
|           |               | cAMP-dependent protein kinase       |      |           |
| MOL000339 | Isoscopoletin | catalytic subunit alpha             | 6263 |           |
| MOL000339 | Isoscopoletin | Glutamate receptor 2                | 921  |           |
|           |               | cAMP-dependent protein kinase       |      |           |
| MOL000339 | Isoscopoletin | inhibitor alpha                     | 6264 |           |
|           |               | Ribosyldihydronicotinamide          |      |           |
| MOL000339 | Isoscopoletin | dehydrogenase [quinone]             | 243  |           |



|           |                 |                                     |      |           |
|-----------|-----------------|-------------------------------------|------|-----------|
| MOL000339 | Isoscopoletin   | Queuine tRNA-ribosyltransferase     | 2561 |           |
| MOL000354 | isorhamnetin    | Nitric oxide synthase, inducible    | 7    | validated |
| MOL000354 | isorhamnetin    | Prostaglandin G/H synthase 1        | 20   |           |
| MOL000354 | isorhamnetin    | Estrogen receptor                   | 136  |           |
| MOL000354 | isorhamnetin    | Androgen receptor                   | 146  |           |
|           |                 | Peroxisome proliferator-activated   |      |           |
| MOL000354 | isorhamnetin    | receptor gamma                      | 238  |           |
| MOL000354 | isorhamnetin    | Prostaglandin G/H synthase 2        | 290  |           |
|           |                 | Tyrosine-protein phosphatase non-   |      |           |
| MOL000354 | isorhamnetin    | receptor type 1                     | 687  |           |
| MOL000354 | isorhamnetin    | Estrogen receptor beta              | 869  |           |
| MOL000354 | isorhamnetin    | Dipeptidyl peptidase 4              | 952  |           |
| MOL000354 | isorhamnetin    | Mitogen-activated protein kinase 14 | 1540 |           |
| MOL000354 | isorhamnetin    | Glycogen synthase kinase-3 beta     | 1721 |           |
| MOL000354 | isorhamnetin    | Heat shock protein HSP 90-alpha     | 1939 |           |
| MOL000354 | isorhamnetin    | Cell division protein kinase 2      | 2240 |           |
|           |                 | Phosphatidylinositol-4,5-           |      |           |
|           |                 | bisphosphate 3-kinase catalytic     |      |           |
| MOL000354 | isorhamnetin    | subunit gamma isoform               | 2404 |           |
|           |                 | cAMP-dependent protein kinase       |      |           |
| MOL000354 | isorhamnetin    | catalytic subunit alpha             | 6263 |           |
| MOL000354 | isorhamnetin    | Trypsin-1                           | 3176 |           |
|           |                 | Proto-oncogene serine/threonine-    |      |           |
| MOL000354 | isorhamnetin    | protein kinase Pim-1                | 2347 |           |
| MOL000354 | isorhamnetin    | Cyclin-A2                           | 6235 |           |
| MOL000354 | isorhamnetin    | Nuclear receptor coactivator 2      | 6241 |           |
| MOL000354 | isorhamnetin    | Calmodulin                          | 465  |           |
| MOL000354 | isorhamnetin    | Glycogen phosphorylase, muscle form | 1152 |           |
|           |                 | Peroxisome proliferator-activated   |      |           |
| MOL000354 | isorhamnetin    | receptor delta                      | 1502 |           |
| MOL000354 | isorhamnetin    | Chk1                                | 5790 |           |
| MOL000354 | isorhamnetin    | Aldose reductase                    | 822  |           |
| MOL000354 | isorhamnetin    | Nuclear receptor coactivator 1      | 6228 |           |
| MOL000354 | isorhamnetin    | Coagulation factor VII              | 369  |           |
| MOL000354 | isorhamnetin    | Prothrombin                         | 54   |           |
| MOL000354 | isorhamnetin    | Nitric-oxide synthase, endothelial  | 291  |           |
| MOL000354 | isorhamnetin    | Acetylcholinesterase                | 474  |           |
|           |                 | Gamma-aminobutyric-acid receptor    |      |           |
| MOL000354 | isorhamnetin    | subunit alpha-1                     | 872  |           |
| MOL000354 | isorhamnetin    | Amine oxidase [flavin-containing] B | 3939 |           |
| MOL000354 | isorhamnetin    | Glutamate receptor 2                | 921  |           |
| MOL000354 | isorhamnetin    | Cytochrome P450-cam                 | 2298 |           |
| MOL000354 | isorhamnetin    | Transcription factor p65            | h001 | validated |
| MOL000354 | isorhamnetin    | Xanthine dehydrogenase/oxidase      | 3947 | validated |
| MOL000354 | isorhamnetin    | Neutrophil cytosol factor 1         | h001 | validated |
|           |                 | Oxidized low-density lipoprotein    |      |           |
| MOL000354 | isorhamnetin    | receptor 1                          | h001 | validated |
| MOL000358 | beta-sitosterol | Progesterone receptor               | 614  |           |
| MOL000358 | beta-sitosterol | Nuclear receptor coactivator 2      | 6241 |           |
| MOL000358 | beta-sitosterol | Prostaglandin G/H synthase 1        | 20   |           |
| MOL000358 | beta-sitosterol | Prostaglandin G/H synthase 2        | 290  |           |
| MOL000358 | beta-sitosterol | Heat shock protein HSP 90-alpha     | 1939 |           |

|           |                    |                                   |      |           |
|-----------|--------------------|-----------------------------------|------|-----------|
|           |                    | Phosphatidylinositol-4, 5-        |      |           |
|           |                    | bisphosphate 3-kinase catalytic   |      |           |
| MOL000358 | beta-sitosterol    | subunit gamma isoform             | 2404 |           |
|           |                    | Potassium voltage-gated channel   |      |           |
| MOL000358 | beta-sitosterol    | subfamily H member 2              | 101  |           |
|           |                    | cAMP-dependent protein kinase     |      |           |
| MOL000358 | beta-sitosterol    | catalytic subunit alpha           | 6263 |           |
| MOL000358 | beta-sitosterol    | D(1A) dopamine receptor           | 23   |           |
| MOL000358 | beta-sitosterol    | M3                                | 51   |           |
| MOL000358 | beta-sitosterol    | M1                                | 103  |           |
|           |                    | Sodium channel protein type 5     |      |           |
| MOL000358 | beta-sitosterol    | subunit alpha                     | 220  |           |
|           |                    | Gamma-aminobutyric-acid receptor  |      |           |
| MOL000358 | beta-sitosterol    | subunit alpha-2                   | 423  |           |
| MOL000358 | beta-sitosterol    | M4                                | 450  |           |
|           |                    | cGMP-inhibited 3',5'-cyclic       |      |           |
| MOL000358 | beta-sitosterol    | phosphodiesterase A               | 485  |           |
| MOL000358 | beta-sitosterol    | 5-hydroxytryptamine 2A receptor   | 502  |           |
|           |                    | Gamma-aminobutyric-acid receptor  |      |           |
| MOL000358 | beta-sitosterol    | subunit alpha-5                   | 523  |           |
| MOL000358 | beta-sitosterol    | Alpha-1A adrenergic receptor      | 556  |           |
|           |                    | Gamma-aminobutyric-acid receptor  |      |           |
| MOL000358 | beta-sitosterol    | subunit alpha-3                   | 580  |           |
| MOL000358 | beta-sitosterol    | M2                                | 617  |           |
| MOL000358 | beta-sitosterol    | Alpha-1B adrenergic receptor      | 632  |           |
| MOL000358 | beta-sitosterol    | Beta-2 adrenergic receptor        | 766  |           |
|           |                    | Neuronal acetylcholine receptor   |      |           |
| MOL000358 | beta-sitosterol    | subunit alpha-2                   | 813  |           |
| MOL000358 | beta-sitosterol    | transporter                       | 824  |           |
| MOL000358 | beta-sitosterol    | Mu-type opioid receptor           | 847  |           |
|           |                    | Gamma-aminobutyric-acid receptor  |      |           |
| MOL000358 | beta-sitosterol    | subunit alpha-1                   | 872  |           |
|           |                    | Neuronal acetylcholine receptor   |      |           |
| MOL000358 | beta-sitosterol    | subunit alpha-7                   | 4095 |           |
| MOL000358 | beta-sitosterol    | Cytochrome P450-cam               | 2298 |           |
| MOL000358 | beta-sitosterol    | Apoptosis regulator Bcl-2         | 273  | validated |
| MOL000358 | beta-sitosterol    | Apoptosis regulator BAX           | h001 | validated |
| MOL000358 | beta-sitosterol    | Caspase-9                         | h001 | validated |
| MOL000358 | beta-sitosterol    | Transcription factor AP-1         | 1629 | validated |
| MOL000358 | beta-sitosterol    | Caspase-3                         | h001 | validated |
| MOL000358 | beta-sitosterol    | Caspase-8                         | h001 | validated |
| MOL000358 | beta-sitosterol    | Protein kinase C alpha type       | h001 | validated |
| MOL000358 | beta-sitosterol    | Transforming growth factor beta-1 | h001 | validated |
| MOL000358 | beta-sitosterol    | Serum paraoxonase/arylesterase 1  | 1198 | validated |
| MOL000358 | beta-sitosterol    | Microtubule-associated protein 2  | 1852 | validated |
| MOL000036 | beta-caryophyllene | Prostaglandin G/H synthase 1      | 20   |           |
| MOL000036 | beta-caryophyllene | M3                                | 51   |           |
| MOL000036 | beta-caryophyllene | M1                                | 103  |           |
| MOL000036 | beta-caryophyllene | Prostaglandin G/H synthase 2      | 290  |           |
|           |                    | Gamma-aminobutyric-acid receptor  |      |           |
| MOL000036 | beta-caryophyllene | subunit alpha-2                   | 423  |           |
| MOL000036 | beta-caryophyllene | Retinoic acid receptor RXR-alpha  | 459  |           |
| MOL000036 | beta-caryophyllene | M2                                | 617  |           |

|           |                    |                                                       |      |           |
|-----------|--------------------|-------------------------------------------------------|------|-----------|
| MOL000036 | beta-caryophyllene | Alpha-1B adrenergic receptor                          | 632  |           |
| MOL000036 | beta-caryophyllene | Neuronal acetylcholine receptor subunit alpha-2       | 813  |           |
| MOL000036 | beta-caryophyllene | Gamma-aminobutyric-acid receptor subunit alpha-1      | 872  |           |
| MOL000036 | beta-caryophyllene | Nuclear receptor coactivator 2                        | 6241 |           |
| MOL000036 | beta-caryophyllene | Gamma-aminobutyric-acid receptor subunit alpha-6      | 841  |           |
| MOL000036 | beta-caryophyllene | Sodium-dependent noradrenaline transporter            | 540  |           |
| MOL000036 | beta-caryophyllene | Alpha-1A adrenergic receptor                          | 556  |           |
| MOL000036 | beta-caryophyllene | transporter                                           | 713  |           |
| MOL000036 | beta-caryophyllene | Interleukin-6                                         | 1159 | validated |
| MOL000040 | Scopoletol         | Prostaglandin G/H synthase 1                          | 20   |           |
| MOL000040 | Scopoletol         | Prothrombin                                           | 54   |           |
| MOL000040 | Scopoletol         | Ribosyldihydronicotinamide dehydrogenase [quinone]    | 243  |           |
| MOL000040 | Scopoletol         | Prostaglandin G/H synthase 2                          | 290  |           |
| MOL000040 | Scopoletol         | Carbonic anhydrase 1                                  | 295  |           |
| MOL000040 | Scopoletol         | Beta-2 adrenergic receptor                            | 766  |           |
| MOL000040 | Scopoletol         | Leukotriene A-4 hydrolase                             | 3060 |           |
| MOL000040 | Scopoletol         | Amine oxidase [flavin-containing] B                   | 3939 |           |
| MOL000040 | Scopoletol         | Glutamate receptor 2                                  | 921  |           |
| MOL000040 | Scopoletol         | cAMP-dependent protein kinase catalytic subunit alpha | 6263 |           |
| MOL000040 | Scopoletol         | Sodium-dependent noradrenaline transporter            | 540  |           |
| MOL000040 | Scopoletol         | Queuine tRNA-ribosyltransferase                       | 2561 |           |
| MOL000415 | rutin              | DNA topoisomerase 2-alpha                             | 817  |           |
| MOL000415 | rutin              | Transcription factor p65                              | h001 | validated |
| MOL000415 | rutin              | Tumor necrosis factor                                 | 777  | validated |
| MOL000415 | rutin              | Interleukin-6                                         | 1159 | validated |
| MOL000415 | rutin              | Caspase-3                                             | h001 | validated |
| MOL000415 | rutin              |                                                       |      | validated |
| MOL000415 | rutin              | Superoxide dismutase [Cu-Zn]                          | 4152 | validated |
| MOL000415 | rutin              | Interleukin-1 beta                                    | 1654 | validated |
| MOL000415 | rutin              | Interleukin-8                                         | h001 | validated |
| MOL000415 | rutin              | Protein kinase C beta type                            | h001 | validated |
| MOL000415 | rutin              | Arachidonate 5-lipoxygenase                           | 275  | validated |
| MOL000415 | rutin              | 3-hydroxy-3-methylglutaryl-coenzyme A reductase       | 3387 | validated |
| MOL000415 | rutin              | Hyaluronan synthase 2                                 | h001 | validated |
| MOL000415 | rutin              | Type I iodothyronine deiodinase                       | h001 | validated |
| MOL000415 | rutin              | receptor                                              | h001 | validated |
| MOL000415 | rutin              | Insulin                                               | 5961 | validated |
| MOL000415 | rutin              | Low affinity immunoglobulin epsilon Fc receptor       | h001 | validated |
| MOL000415 | rutin              | Integrin beta-2                                       | 1630 | validated |
| MOL000415 | rutin              | Thromboxane A2 receptor                               | 835  | validated |
| MOL000437 | Hirsutrin          | DNA topoisomerase 2-alpha                             | 817  |           |
| MOL000437 | Hirsutrin          | Tyrosine-protein phosphatase non-receptor type 1      | 687  |           |

|           |            |                                     |      |
|-----------|------------|-------------------------------------|------|
| MOL000437 | Hirsutrin  | Coagulation factor X                | 239  |
| MOL004609 | Areapillin | Nitric oxide synthase, inducible    | 7    |
| MOL004609 | Areapillin | Prothrombin                         | 54   |
| MOL004609 | Areapillin | Androgen receptor                   | 146  |
|           |            | Sodium channel protein type 5       |      |
| MOL004609 | Areapillin | subunit alpha                       | 220  |
| MOL004609 | Areapillin | Coagulation factor X                | 239  |
| MOL004609 | Areapillin | Prostaglandin G/H synthase 2        | 290  |
| MOL004609 | Areapillin | Coagulation factor VII              | 369  |
|           |            | Tyrosine-protein phosphatase non-   |      |
| MOL004609 | Areapillin | receptor type 1                     | 687  |
| MOL004609 | Areapillin | DNA topoisomerase 2-alpha           | 817  |
| MOL004609 | Areapillin | Estrogen receptor beta              | 869  |
| MOL004609 | Areapillin | Dipeptidyl peptidase 4              | 952  |
| MOL004609 | Areapillin | Heat shock protein HSP 90-alpha     | 1939 |
| MOL004609 | Areapillin | Ig gamma-1 chain C region           | 4785 |
| MOL004609 | Areapillin | Trypsin-1                           | 3176 |
| MOL004609 | Areapillin | Nuclear receptor coactivator 2      | 6241 |
| MOL004609 | Areapillin | Nuclear receptor coactivator 1      | 6228 |
| MOL004609 | Areapillin | Calmodulin                          | 465  |
| MOL004617 | Ayapanin   | Prostaglandin G/H synthase 1        | 20   |
| MOL004617 | Ayapanin   | Prothrombin                         | 54   |
| MOL004617 | Ayapanin   | Prostaglandin G/H synthase 2        | 290  |
| MOL004617 | Ayapanin   | Alpha-2A adrenergic receptor        | 318  |
| MOL004617 | Ayapanin   | transporter                         | 713  |
| MOL004617 | Ayapanin   | Beta-2 adrenergic receptor          | 766  |
| MOL004617 | Ayapanin   | transporter                         | 824  |
| MOL004617 | Ayapanin   | Leukotriene A-4 hydrolase           | 3060 |
| MOL004617 | Ayapanin   | Amine oxidase [flavin-containing] B | 3939 |
| MOL004617 | Ayapanin   | Amine oxidase [flavin-containing] A | 3941 |
|           |            | cAMP-dependent protein kinase       |      |
| MOL004617 | Ayapanin   | catalytic subunit alpha             | 6263 |
| MOL004617 | Ayapanin   | M1                                  | 103  |
| MOL004617 | Ayapanin   | Alpha-1A adrenergic receptor        | 556  |
| MOL004617 | Ayapanin   | Dipeptidyl peptidase 4              | 952  |
|           |            | cAMP-dependent protein kinase       |      |
| MOL004617 | Ayapanin   | inhibitor alpha                     | 6264 |
| MOL004734 | Butal      | Haloalkane dehalogenase             | 2281 |
| MOL004734 | Butal      | A2                                  | 6270 |
| MOL004734 | Butal      | Trypsin-3                           | 2886 |
| MOL005109 | Capillarin | Prostaglandin G/H synthase 1        | 20   |
| MOL005109 | Capillarin | Prostaglandin G/H synthase 2        | 290  |
| MOL005109 | Capillarin | Amine oxidase [flavin-containing] B | 3939 |
|           |            | cAMP-dependent protein kinase       |      |
| MOL005109 | Capillarin | catalytic subunit alpha             | 6263 |
| MOL005573 | Genkwanin  | Nitric oxide synthase, inducible    | 7    |
| MOL005573 | Genkwanin  | Prostaglandin G/H synthase 1        | 20   |
| MOL005573 | Genkwanin  | Androgen receptor                   | 146  |
| MOL005573 | Genkwanin  | Prostaglandin G/H synthase 2        | 290  |
| MOL005573 | Genkwanin  | Retinoic acid receptor RXR-alpha    | 459  |
| MOL005573 | Genkwanin  | Estrogen receptor beta              | 869  |
| MOL005573 | Genkwanin  | Dipeptidyl peptidase 4              | 952  |

|           |                                 |                                                                  |      |           |
|-----------|---------------------------------|------------------------------------------------------------------|------|-----------|
| MOL005573 | Genkwanin                       | Heat shock protein HSP 90-alpha<br>cAMP-dependent protein kinase | 1939 |           |
| MOL005573 | Genkwanin                       | catalytic subunit alpha                                          | 6263 |           |
| MOL005573 | Genkwanin                       | Trypsin-1                                                        | 3176 |           |
| MOL005573 | Genkwanin                       | Nuclear receptor coactivator 2                                   | 6241 |           |
| MOL005573 | Genkwanin                       | Nuclear receptor coactivator 1                                   | 6228 |           |
| MOL005573 | Genkwanin                       | Calmodulin                                                       | 465  |           |
| MOL005573 | Genkwanin                       | Chk1                                                             | 5790 |           |
| MOL000635 | vanillin                        | Amine oxidase [flavin-containing] B                              | 3939 |           |
| MOL000635 | vanillin                        | Amine oxidase [flavin-containing] A                              | 3941 |           |
| MOL000635 | vanillin                        | Lysozyme                                                         | 2300 |           |
|           |                                 | Nicotinate-nucleotide--<br>dimethylbenzimidazole                 |      |           |
| MOL000635 | vanillin                        | phosphoribosyltransferase                                        | 2264 |           |
| MOL000635 | vanillin                        | Prostaglandin G/H synthase 2                                     | 290  |           |
|           |                                 | Gamma-aminobutyric-acid receptor<br>subunit alpha-1              | 872  |           |
| MOL000635 | vanillin                        |                                                                  |      |           |
| MOL000635 | vanillin                        | Cytochrome P450-cam                                              | 2298 |           |
| MOL000635 | vanillin                        | Matrix metalloproteinase-9                                       | h001 | validated |
| MOL000635 | vanillin                        | Mitogen-activated protein kinase 1                               | 1176 | validated |
| MOL000635 | vanillin                        | Transcription factor AP-1                                        | 1629 | validated |
| MOL006589 | Artepillin C                    | Prostaglandin G/H synthase 1                                     | 20   |           |
| MOL006589 | Artepillin C                    | M1                                                               | 103  |           |
| MOL006589 | Artepillin C                    | Estrogen receptor                                                | 136  |           |
|           |                                 | Peroxisome proliferator-activated<br>receptor gamma              | 238  |           |
| MOL006589 | Artepillin C                    | Prostaglandin G/H synthase 2                                     | 290  |           |
|           |                                 | cGMP-inhibited 3',5'-cyclic<br>phosphodiesterase A               | 485  |           |
|           |                                 | Sodium-dependent noradrenaline<br>transporter                    | 540  |           |
| MOL006589 | Artepillin C                    |                                                                  | 713  |           |
| MOL006589 | Artepillin C                    | Beta-2 adrenergic receptor                                       | 766  |           |
| MOL006589 | Artepillin C                    | Leukotriene A-4 hydrolase                                        | 3060 |           |
|           | Isorhamnetin-3-<br>mono-beta-D- | Coagulation factor X                                             | 239  |           |
| MOL007260 | Isorhamnetin-3-<br>mono-beta-D- | DNA topoisomerase 2-alpha                                        | 817  |           |
|           | Isorhamnetin-3-<br>mono-beta-D- | Tyrosine-protein phosphatase non-<br>receptor type 1             | 687  |           |
| MOL007260 |                                 |                                                                  |      |           |
| MOL007274 | Skrofulein                      | Nitric oxide synthase, inducible                                 | 7    |           |
| MOL007274 | Skrofulein                      | Prostaglandin G/H synthase 1                                     | 20   |           |
|           |                                 | Sodium channel protein type 5<br>subunit alpha                   | 220  |           |
| MOL007274 | Skrofulein                      | Prostaglandin G/H synthase 2                                     | 290  |           |
| MOL007274 | Skrofulein                      | Dipeptidyl peptidase 4                                           | 952  |           |
| MOL007274 | Skrofulein                      | Heat shock protein HSP 90-alpha<br>cAMP-dependent protein kinase | 1939 |           |
|           |                                 | catalytic subunit alpha                                          | 6263 |           |
| MOL007274 | Skrofulein                      | Trypsin-1                                                        | 3176 |           |
| MOL007274 | Skrofulein                      | Nuclear receptor coactivator 2                                   | 6241 |           |

|           |               |                                     |      |
|-----------|---------------|-------------------------------------|------|
| MOL007274 | Skrofullein   | Nuclear receptor coactivator 1      | 6228 |
| MOL007274 | Skrofullein   | Calmodulin                          | 465  |
| MOL007405 | Cirsilineol   | Nitric oxide synthase, inducible    | 7    |
|           |               | Potassium voltage-gated channel     |      |
| MOL007405 | Cirsilineol   | subfamily H member 2                | 101  |
| MOL007405 | Cirsilineol   | Androgen receptor                   | 146  |
|           |               | Sodium channel protein type 5       |      |
| MOL007405 | Cirsilineol   | subunit alpha                       | 220  |
| MOL007405 | Cirsilineol   | Coagulation factor X                | 239  |
| MOL007405 | Cirsilineol   | Prostaglandin G/H synthase 2        | 290  |
| MOL007405 | Cirsilineol   | Nitric-oxide synthase, endothelial  | 291  |
| MOL007405 | Cirsilineol   | Coagulation factor VII              | 369  |
| MOL007405 | Cirsilineol   | DNA topoisomerase 2-alpha           | 817  |
| MOL007405 | Cirsilineol   | Estrogen receptor beta              | 869  |
| MOL007405 | Cirsilineol   | Dipeptidyl peptidase 4              | 952  |
|           |               | Peroxisome proliferator-activated   |      |
| MOL007405 | Cirsilineol   | receptor delta                      | 1502 |
| MOL007405 | Cirsilineol   | Mitogen-activated protein kinase 14 | 1540 |
| MOL007405 | Cirsilineol   | Glycogen synthase kinase-3 beta     | 1721 |
| MOL007405 | Cirsilineol   | Heat shock protein HSP 90-alpha     | 1939 |
| MOL007405 | Cirsilineol   | Cell division protein kinase 2      | 2240 |
| MOL007405 | Cirsilineol   | Chk1                                | 5790 |
| MOL007405 | Cirsilineol   | Trypsin-1                           | 3176 |
| MOL007405 | Cirsilineol   | Nuclear receptor coactivator 2      | 6241 |
| MOL007405 | Cirsilineol   | Nuclear receptor coactivator 1      | 6228 |
|           |               | Calcium-activated potassium channel |      |
| MOL007405 | Cirsilineol   | subunit alpha 1                     | 610  |
| MOL007405 | Cirsilineol   | Calmodulin                          | 465  |
| MOL007405 | Cirsilineol   | Prothrombin                         | 54   |
|           |               | cAMP-dependent protein kinase       |      |
| MOL007405 | Cirsilineol   | catalytic subunit alpha             | 6263 |
| MOL008039 | Isoarcapillin | Nitric oxide synthase, inducible    | 7    |
| MOL008039 | Isoarcapillin | Prothrombin                         | 54   |
| MOL008039 | Isoarcapillin | Androgen receptor                   | 146  |
|           |               | Sodium channel protein type 5       |      |
| MOL008039 | Isoarcapillin | subunit alpha                       | 220  |
| MOL008039 | Isoarcapillin | Coagulation factor X                | 239  |
| MOL008039 | Isoarcapillin | Prostaglandin G/H synthase 2        | 290  |
| MOL008039 | Isoarcapillin | Coagulation factor VII              | 369  |
|           |               | Tyrosine-protein phosphatase non-   |      |
| MOL008039 | Isoarcapillin | receptor type 1                     | 687  |
| MOL008039 | Isoarcapillin | DNA topoisomerase 2-alpha           | 817  |
| MOL008039 | Isoarcapillin | Estrogen receptor beta              | 869  |
| MOL008039 | Isoarcapillin | Dipeptidyl peptidase 4              | 952  |
| MOL008039 | Isoarcapillin | Heat shock protein HSP 90-alpha     | 1939 |
| MOL008039 | Isoarcapillin | Trypsin-1                           | 3176 |
| MOL008039 | Isoarcapillin | Nuclear receptor coactivator 2      | 6241 |
| MOL008039 | Isoarcapillin | Calmodulin                          | 465  |
| MOL008040 | Eupalitin     | Nitric oxide synthase, inducible    | 7    |
| MOL008040 | Eupalitin     | Prostaglandin G/H synthase 1        | 20   |
| MOL008040 | Eupalitin     | Androgen receptor                   | 146  |

|           |                    |                                     |      |           |
|-----------|--------------------|-------------------------------------|------|-----------|
|           |                    | Sodium channel protein type 5       |      |           |
| MOL008040 | Eupalitin          | subunit alpha                       | 220  |           |
| MOL008040 | Eupalitin          | Prostaglandin G/H synthase 2        | 290  |           |
| MOL008040 | Eupalitin          | Estrogen receptor beta              | 869  |           |
| MOL008040 | Eupalitin          | Dipeptidyl peptidase 4              | 952  |           |
| MOL008040 | Eupalitin          | Mitogen-activated protein kinase 14 | 1540 |           |
| MOL008040 | Eupalitin          | Glycogen synthase kinase-3 beta     | 1721 |           |
| MOL008040 | Eupalitin          | Heat shock protein HSP 90-alpha     | 1939 |           |
| MOL008040 | Eupalitin          | Cell division protein kinase 2      | 2240 |           |
| MOL008040 | Eupalitin          | Chk1                                | 5790 |           |
| MOL008040 | Eupalitin          | Trypsin-1                           | 3176 |           |
| MOL008040 | Eupalitin          | Calmodulin                          | 465  |           |
| MOL008040 | Eupalitin          | Prothrombin                         | 54   |           |
|           |                    | cAMP-dependent protein kinase       |      |           |
| MOL008040 | Eupalitin          | catalytic subunit alpha             | 6263 |           |
| MOL008041 | Eupatolitin        | Nitric oxide synthase, inducible    | 7    |           |
| MOL008041 | Eupatolitin        | Androgen receptor                   | 146  |           |
|           |                    | Sodium channel protein type 5       |      |           |
| MOL008041 | Eupatolitin        | subunit alpha                       | 220  |           |
| MOL008041 | Eupatolitin        | Prostaglandin G/H synthase 2        | 290  |           |
| MOL008041 | Eupatolitin        | DNA topoisomerase 2-alpha           | 817  |           |
| MOL008041 | Eupatolitin        | Estrogen receptor beta              | 869  |           |
| MOL008041 | Eupatolitin        | Dipeptidyl peptidase 4              | 952  |           |
| MOL008041 | Eupatolitin        | Heat shock protein HSP 90-alpha     | 1939 |           |
| MOL008041 | Eupatolitin        | Cell division protein kinase 2      | 2240 |           |
| MOL008041 | Eupatolitin        | Trypsin-1                           | 3176 |           |
| MOL008043 | capillarisin       | Prostaglandin G/H synthase 1        | 20   |           |
| MOL008043 | capillarisin       | Prostaglandin G/H synthase 2        | 290  |           |
|           |                    | Tyrosine-protein phosphatase non-   |      |           |
| MOL008043 | capillarisin       | receptor type 1                     | 687  |           |
| MOL008043 | capillarisin       | Aldose reductase                    | 822  |           |
| MOL008043 | capillarisin       | Dipeptidyl peptidase 4              | 952  |           |
| MOL008043 | capillarisin       | Glycogen phosphorylase, muscle form | 1152 |           |
| MOL008043 | capillarisin       | Mitogen-activated protein kinase 14 | 1540 |           |
| MOL008043 | capillarisin       | Glycogen synthase kinase-3 beta     | 1721 |           |
| MOL008043 | capillarisin       | Heat shock protein HSP 90-alpha     | 1939 |           |
| MOL008043 | capillarisin       | Cell division protein kinase 2      | 2240 |           |
|           |                    | Phosphatidylinositol-4,5-           |      |           |
|           |                    | bisphosphate 3-kinase catalytic     |      |           |
| MOL008043 | capillarisin       | subunit gamma isoform               | 2404 |           |
| MOL008043 | capillarisin       | Chk1                                | 5790 |           |
|           |                    | cAMP-dependent protein kinase       |      |           |
| MOL008043 | capillarisin       | catalytic subunit alpha             | 6263 |           |
| MOL008043 | capillarisin       | Calmodulin                          | 465  |           |
| MOL008043 | capillarisin       | Matrix metalloproteinase-9          | h001 | validated |
| MOL008044 | Methylcapillarisin | Nitric oxide synthase, inducible    | 7    |           |
| MOL008044 | Methylcapillarisin | Prostaglandin G/H synthase 1        | 20   |           |
| MOL008044 | Methylcapillarisin | Prothrombin                         | 54   |           |
|           |                    | 7-                                  |      |           |
|           |                    | Sodium channel protein type 5       |      |           |
| MOL008044 | Methylcapillarisin | subunit alpha                       | 220  |           |
| MOL008044 | Methylcapillarisin | Prostaglandin G/H synthase 2        | 290  |           |

|           |                    |                                     |      |
|-----------|--------------------|-------------------------------------|------|
|           | 7-                 | Tyrosine-protein phosphatase non-   |      |
| MOL008044 | Methylcapillarisin | receptor type 1                     | 687  |
| MOL008044 | Methylcapillarisin | Estrogen receptor beta              | 869  |
| MOL008044 | Methylcapillarisin | Dipeptidyl peptidase 4              | 952  |
| MOL008044 | Methylcapillarisin | Heat shock protein HSP 90-alpha     | 1939 |
| MOL008044 | Methylcapillarisin | Cell division protein kinase 2      | 2240 |
| MOL008044 | Methylcapillarisin | Chk1                                | 5790 |
|           | 7-                 | cAMP-dependent protein kinase       |      |
| MOL008044 | Methylcapillarisin | catalytic subunit alpha             | 6263 |
| MOL008044 | Methylcapillarisin | Calmodulin                          | 465  |
|           | 4'-                |                                     |      |
| MOL008045 | Methylcapillarisin | Prothrombin                         | 54   |
|           | 4'-                | Sodium channel protein type 5       |      |
| MOL008045 | Methylcapillarisin | subunit alpha                       | 220  |
|           | 4'-                |                                     |      |
| MOL008045 | Methylcapillarisin | Prostaglandin G/H synthase 2        | 290  |
|           | 4'-                | Tyrosine-protein phosphatase non-   |      |
| MOL008045 | Methylcapillarisin | receptor type 1                     | 687  |
|           | 4'-                |                                     |      |
| MOL008045 | Methylcapillarisin | Dipeptidyl peptidase 4              | 952  |
|           | 4'-                |                                     |      |
| MOL008045 | Methylcapillarisin | Mitogen-activated protein kinase 14 | 1540 |
|           | 4'-                |                                     |      |
| MOL008045 | Methylcapillarisin | Glycogen synthase kinase-3 beta     | 1721 |
|           | 4'-                |                                     |      |
| MOL008045 | Methylcapillarisin | Heat shock protein HSP 90-alpha     | 1939 |
|           | 4'-                |                                     |      |
| MOL008045 | Methylcapillarisin | Cell division protein kinase 2      | 2240 |
|           | 4'-                | cAMP-dependent protein kinase       |      |
| MOL008045 | Methylcapillarisin | catalytic subunit alpha             | 6263 |
|           | 4'-                |                                     |      |
| MOL008045 | Methylcapillarisin | Calmodulin                          | 465  |
|           | Demethoxycapillari |                                     |      |
| MOL008046 | sin                | Prostaglandin G/H synthase 1        | 20   |
|           | Demethoxycapillari |                                     |      |
| MOL008046 | sin                | Estrogen receptor                   | 136  |
|           | Demethoxycapillari | Peroxisome proliferator-activated   |      |
| MOL008046 | sin                | receptor gamma                      | 238  |
|           | Demethoxycapillari |                                     |      |
| MOL008046 | sin                | Prostaglandin G/H synthase 2        | 290  |
|           | Demethoxycapillari | Tyrosine-protein phosphatase non-   |      |
| MOL008046 | sin                | receptor type 1                     | 687  |
|           | Demethoxycapillari |                                     |      |
| MOL008046 | sin                | Dipeptidyl peptidase 4              | 952  |
|           | Demethoxycapillari |                                     |      |
| MOL008046 | sin                | Mitogen-activated protein kinase 14 | 1540 |
|           | Demethoxycapillari |                                     |      |
| MOL008046 | sin                | Glycogen synthase kinase-3 beta     | 1721 |
|           | Demethoxycapillari |                                     |      |
| MOL008046 | sin                | Heat shock protein HSP 90-alpha     | 1939 |
|           | Demethoxycapillari |                                     |      |
| MOL008046 | sin                | Cell division protein kinase 2      | 2240 |



|           |                           |                                                                                          |      |
|-----------|---------------------------|------------------------------------------------------------------------------------------|------|
| MOL008046 | Demethoxycapillari<br>sin | cAMP-dependent protein kinase<br>catalytic subunit alpha                                 | 6263 |
| MOL008046 | Demethoxycapillari<br>sin | Aldose reductase                                                                         | 822  |
| MOL008046 | Demethoxycapillari<br>sin | Phosphatidylinositol-4,5-<br>bisphosphate 3-kinase catalytic<br>subunit gamma isoform    | 2404 |
| MOL008047 | Artepillin A              | Nitric oxide synthase, inducible                                                         | 7    |
| MOL008047 | Artepillin A              | Prostaglandin G/H synthase 1                                                             | 20   |
| MOL008047 | Artepillin A              | Prothrombin                                                                              | 54   |
| MOL008047 | Artepillin A              | M1                                                                                       | 103  |
| MOL008047 | Artepillin A              | Estrogen receptor                                                                        | 136  |
| MOL008047 | Artepillin A              | Androgen receptor                                                                        | 146  |
| MOL008047 | Artepillin A              | Prostaglandin G/H synthase 2                                                             | 290  |
| MOL008047 | Artepillin A              | Nitric-oxide synthase, endothelial<br>cGMP-inhibited 3',5'-cyclic<br>phosphodiesterase A | 291  |
| MOL008047 | Artepillin A              | phosphodiesterase A                                                                      | 485  |
| MOL008047 | Artepillin A              | Alpha-1A adrenergic receptor                                                             | 556  |
| MOL008047 | Artepillin A              | Beta-2 adrenergic receptor                                                               | 766  |
| MOL008047 | Artepillin A              | Estrogen receptor beta                                                                   | 869  |
| MOL008047 | Artepillin A              | Dipeptidyl peptidase 4                                                                   | 952  |
| MOL008047 | Artepillin A              | Glycogen synthase kinase-3 beta                                                          | 1721 |
| MOL008047 | Artepillin A              | Cell division protein kinase 2                                                           | 2240 |
| MOL008047 | Artepillin A              | Beta-lactamase                                                                           | 2478 |
| MOL008047 | Artepillin A              | Trypsin-1                                                                                | 3176 |
| MOL008052 | Capillene                 | Amine oxidase [flavin-containing] B                                                      | 3939 |
| MOL008054 | Capillanol                | Amine oxidase [flavin-containing] B                                                      | 3939 |
| MOL008054 | Capillanol                | Amine oxidase [flavin-containing] A                                                      | 3941 |
| MOL008054 | Capillanol                | cAMP-dependent protein kinase<br>inhibitor alpha                                         | 6264 |
| MOL008057 | Capillin                  | Prostaglandin G/H synthase 1                                                             | 20   |
| MOL008057 | Capillin                  | Prostaglandin G/H synthase 2                                                             | 290  |
| MOL008057 | Capillin                  | Amine oxidase [flavin-containing] B                                                      | 3939 |
| MOL008057 | Capillin                  | Amine oxidase [flavin-containing] A                                                      | 3941 |
| MOL000908 | beta-elemene              | Prostaglandin G/H synthase 2                                                             | 290  |
| MOL000908 | beta-elemene              | Gamma-aminobutyric-acid receptor<br>subunit alpha-2                                      | 423  |
| MOL000908 | beta-elemene              | Retinoic acid receptor RXR-alpha                                                         | 459  |
| MOL000908 | beta-elemene              | Sodium-dependent noradrenaline<br>transporter                                            | 540  |
| MOL000908 | beta-elemene              | Gamma-aminobutyric-acid receptor<br>subunit alpha-3                                      | 580  |
| MOL000908 | beta-elemene              | M2                                                                                       | 617  |
| MOL000908 | beta-elemene              | Gamma-aminobutyric-acid receptor<br>subunit alpha-1                                      | 872  |
| MOL000908 | beta-elemene              | subunit alpha-6                                                                          | 841  |
| MOL000908 | beta-elemene              | Prostaglandin G/H synthase 1                                                             | 20   |
| MOL000908 | beta-elemene              | M3                                                                                       | 51   |
| MOL000908 | beta-elemene              | M1                                                                                       | 103  |
| MOL000908 | beta-elemene              | Alpha-1A adrenergic receptor                                                             | 556  |

|           |              |                                     |      |           |
|-----------|--------------|-------------------------------------|------|-----------|
|           |              | Neuronal acetylcholine receptor     |      |           |
| MOL000908 | beta-elemene | subunit alpha-7                     | 4095 |           |
| MOL000908 | beta-elemene | Nuclear receptor coactivator 2      | 6241 |           |
|           |              | Gamma-aminobutyric-acid receptor    |      |           |
| MOL000908 | beta-elemene | subunit alpha-5                     | 523  |           |
| MOL000908 | beta-elemene | Apoptosis regulator Bcl-2           | 273  | validated |
| MOL000908 | beta-elemene | Cyclin-dependent kinase inhibitor 1 | h001 | validated |
|           |              | Eukaryotic translation initiation   |      |           |
| MOL000908 | beta-elemene | factor 6                            | h001 | validated |
| MOL000908 | beta-elemene | Retinoblastoma-associated protein   | 3846 | validated |
| MOL000908 | beta-elemene | Cellular tumor antigen p53          | 5788 | validated |
| MOL000908 | beta-elemene | Telomerase protein component 1      | h001 | validated |
| MOL000908 | beta-elemene | Protein CBFA2T1                     | h001 | validated |
|           |              | Cell division control protein 2     |      |           |
| MOL000908 | beta-elemene | homolog                             | 1771 | validated |
| MOL000908 | beta-elemene | G2/mitotic-specific cyclin-B1       | h001 | validated |
| MOL000908 | beta-elemene | Transforming protein RhoA           | h001 | validated |
| MOL000916 | Car-3-ene    | Cytochrome P450-cam                 | 2298 |           |
| MOL000916 | Car-3-ene    | Prostaglandin G/H synthase 2        | 290  |           |
| MOL000916 | Car-3-ene    | Retinoic acid receptor RXR-alpha    | 459  |           |
| MOL000916 | Car-3-ene    | Nuclear receptor coactivator 2      | 6241 |           |
| MOL000098 | quercetin    | Prostaglandin G/H synthase 1        | 20   | validated |
| MOL000098 | quercetin    | Androgen receptor                   | 146  | validated |
|           |              | Peroxisome proliferator-activated   |      |           |
| MOL000098 | quercetin    | receptor gamma                      | 238  |           |
| MOL000098 | quercetin    | Prostaglandin G/H synthase 2        | 290  | validated |
| MOL000098 | quercetin    | Heat shock protein HSP 90-alpha     | 1939 |           |
|           |              | Phosphatidylinositol-4,5-           |      |           |
|           |              | bisphosphate 3-kinase catalytic     |      |           |
| MOL000098 | quercetin    | subunit gamma isoform               | 2404 |           |
| MOL000098 | quercetin    | Nuclear receptor coactivator 2      | 6241 |           |
| MOL000098 | quercetin    | Dipeptidyl peptidase 4              | 952  |           |
| MOL000098 | quercetin    | Aldose reductase                    | 822  |           |
| MOL000098 | quercetin    | Trypsin-1                           | 3176 |           |
| MOL000098 | quercetin    | DNA topoisomerase 2-alpha           | 817  |           |
| MOL000098 | quercetin    | Prothrombin                         | 54   |           |
|           |              | Potassium voltage-gated channel     |      |           |
| MOL000098 | quercetin    | subfamily H member 2                | 101  |           |
|           |              | Sodium channel protein type 5       |      |           |
| MOL000098 | quercetin    | subunit alpha                       | 220  |           |
| MOL000098 | quercetin    | Coagulation factor X                | 239  |           |
| MOL000098 | quercetin    | Beta-2 adrenergic receptor          | 766  |           |
| MOL000098 | quercetin    | Stromelysin-1                       | 1926 |           |
|           |              | cAMP-dependent protein kinase       |      |           |
| MOL000098 | quercetin    | catalytic subunit alpha             | 6263 |           |
| MOL000098 | quercetin    | Coagulation factor VII              | 369  |           |
| MOL000098 | quercetin    | Nitric-oxide synthase, endothelial  | 291  |           |
| MOL000098 | quercetin    | Retinoic acid receptor RXR-alpha    | 459  |           |
| MOL000098 | quercetin    | Acetylcholinesterase                | 474  |           |
|           |              | Gamma-aminobutyric-acid receptor    |      |           |
| MOL000098 | quercetin    | subunit alpha-1                     | 872  |           |
| MOL000098 | quercetin    | Amine oxidase [flavin-containing] B | 3939 |           |

|           |           |                                     |      |           |
|-----------|-----------|-------------------------------------|------|-----------|
| MOL000098 | quercetin | Transcription factor p65            | h001 | validated |
| MOL000098 | quercetin | Epidermal growth factor receptor    | 844  | validated |
|           |           | RAC-alpha serine/threonine-protein  |      |           |
| MOL000098 | quercetin | kinase                              | h001 | validated |
| MOL000098 | quercetin |                                     |      | validated |
| MOL000098 | quercetin | G1/S-specific cyclin-D1             | h001 | validated |
| MOL000098 | quercetin | Apoptosis regulator Bcl-2           | 273  | validated |
| MOL000098 | quercetin | Bcl-2-like protein 1                | h001 | validated |
| MOL000098 | quercetin | Proto-oncogene c-Fos                | h001 | validated |
| MOL000098 | quercetin | Cyclin-dependent kinase inhibitor 1 | h001 | validated |
|           |           | Eukaryotic translation initiation   |      |           |
| MOL000098 | quercetin | factor 6                            | h001 | validated |
| MOL000098 | quercetin | Apoptosis regulator BAX             | h001 | validated |
| MOL000098 | quercetin | Caspase-9                           | h001 | validated |
| MOL000098 | quercetin | activator                           | 1074 | validated |
| MOL000098 | quercetin | 72 kDa type IV collagenase          | 707  | validated |
| MOL000098 | quercetin | Matrix metalloproteinase-9          | h001 | validated |
| MOL000098 | quercetin | Mitogen-activated protein kinase 1  | 1176 | validated |
| MOL000098 | quercetin | Interleukin-10                      | h001 | validated |
| MOL000098 | quercetin | Retinoblastoma-associated protein   | 3846 | validated |
| MOL000098 | quercetin | Tumor necrosis factor               | 777  | validated |
| MOL000098 | quercetin | Transcription factor AP-1           | 1629 | validated |
| MOL000098 | quercetin | Interleukin-6                       | 1159 | validated |
|           |           | Cyclin-dependent kinase inhibitor   |      |           |
| MOL000098 | quercetin | 2A, isoforms 1/2/3                  | h001 | validated |
|           |           | Activator of 90 kDa heat shock      |      |           |
| MOL000098 | quercetin | protein ATPase homolog 1            | h001 | validated |
| MOL000098 | quercetin | Caspase-3                           | h001 | validated |
| MOL000098 | quercetin | Cellular tumor antigen p53          | 5788 | validated |
| MOL000098 | quercetin | ETS domain-containing protein Elk-1 | h001 | validated |
| MOL000098 | quercetin | NF-kappa-B inhibitor alpha          | h001 | validated |
| MOL000098 | quercetin | Ornithine decarboxylase             | 449  | validated |
| MOL000098 | quercetin | Xanthine dehydrogenase/oxidase      | 3947 | validated |
| MOL000098 | quercetin | Caspase-8                           | h001 | validated |
| MOL000098 | quercetin | DNA topoisomerase 1                 | 3552 | validated |
|           |           | RAF proto-oncogene                  |      |           |
| MOL000098 | quercetin | serine/threonine-protein kinase     | h001 | validated |
| MOL000098 | quercetin | Superoxide dismutase [Cu-Zn]        | 4152 | validated |
| MOL000098 | quercetin | Protein kinase C alpha type         | h001 | validated |
| MOL000098 | quercetin | Interstitial collagenase            | 1167 | validated |
| MOL000098 | quercetin | Hypoxia-inducible factor 1-alpha    | h001 | validated |
|           |           | Signal transducer and activator of  |      |           |
| MOL000098 | quercetin | transcription 1-alpha/beta          | h001 | validated |
| MOL000098 | quercetin | Protein CBFA2T1                     | h001 | validated |
|           |           | Probable E3 ubiquitin-protein       |      |           |
| MOL000098 | quercetin | ligase HERC5                        | h001 | validated |
|           |           | Cell division control protein 2     |      |           |
| MOL000098 | quercetin | homolog                             | 1771 | validated |
| MOL000098 | quercetin | 78 kDa glucose-regulated protein    | 1847 | validated |
|           |           | Receptor tyrosine-protein kinase    |      |           |
| MOL000098 | quercetin | erbB-2                              | h001 | validated |

|           |           |                                    |      |           |
|-----------|-----------|------------------------------------|------|-----------|
|           |           | Peroxisome proliferator-activated  |      |           |
| MOL000098 | quercetin | receptor gamma                     | h001 | validated |
| MOL000098 | quercetin | Acetyl-CoA carboxylase 1           | 690  | validated |
| MOL000098 | quercetin | Heme oxygenase 1                   | 3391 | validated |
| MOL000098 | quercetin | Cytochrome P450 3A4                | 4512 | validated |
| MOL000098 | quercetin | Caveolin-1                         | h001 | validated |
| MOL000098 | quercetin | Myc proto-oncogene protein         | h001 | validated |
| MOL000098 | quercetin | Tissue factor                      | 2139 | validated |
| MOL000098 | quercetin | Gap junction alpha-1 protein       | 1827 | validated |
| MOL000098 | quercetin | Cytochrome P450 1A1                | h001 | validated |
| MOL000098 | quercetin | Intercellular adhesion molecule 1  | h001 | validated |
| MOL000098 | quercetin | Interleukin-1 beta                 | 1654 | validated |
| MOL000098 | quercetin | Small inducible cytokine A2        | 1649 | validated |
| MOL000098 | quercetin | E-selectin                         | 1756 | validated |
| MOL000098 | quercetin | Vascular cell adhesion protein 1   | 1908 | validated |
| MOL000098 | quercetin | subtype                            | 4131 | validated |
| MOL000098 | quercetin | Interleukin-8                      | h001 | validated |
| MOL000098 | quercetin | Protein kinase C beta type         | h001 | validated |
|           |           | Baculoviral IAP repeat-containing  |      |           |
| MOL000098 | quercetin | protein 5                          | h001 | validated |
| MOL000098 | quercetin | Dual oxidase 2                     | h001 | validated |
| MOL000098 | quercetin | Nitric oxide synthase, endothelial | h001 | validated |
| MOL000098 | quercetin | Heat shock protein beta-1          | h001 | validated |
| MOL000098 | quercetin | Transforming growth factor beta-1  | h001 | validated |
| MOL000098 | quercetin | Maltase-glucoamylase, intestinal   | 929  | validated |
| MOL000098 | quercetin | Interleukin-2                      | 1575 | validated |
|           |           | Nuclear receptor subfamily 1 group |      |           |
| MOL000098 | quercetin | I member 2                         | h001 | validated |
| MOL000098 | quercetin | Cytochrome P450 1B1                | h001 | validated |
| MOL000098 | quercetin | G2/mitotic-specific cyclin-B1      | h001 | validated |
| MOL000098 | quercetin | Tissue-type plasminogen activator  | 1792 | validated |
| MOL000098 | quercetin | Thrombomodulin                     | 2021 | validated |
| MOL000098 | quercetin | Plasminogen activator inhibitor 1  | h001 | validated |
| MOL000098 | quercetin | Interferon gamma                   | 1253 | validated |
| MOL000098 | quercetin | Arachidonate 5-lipoxygenase        | 275  | validated |
|           |           | Phosphatidylinositol-3,4,5-        |      |           |
|           |           | trisphosphate 3-phosphatase and    |      |           |
| MOL000098 | quercetin | dual-specificity protein           | h001 | validated |
| MOL000098 | quercetin | Interleukin-1 alpha                | h001 | validated |
| MOL000098 | quercetin | Myeloperoxidase                    | 1757 | validated |
| MOL000098 | quercetin | DNA topoisomerase 2-alpha          | h001 | validated |
| MOL000098 | quercetin | Neutrophil cytosol factor 1        | h001 | validated |
|           |           | ATP-binding cassette sub-family G  |      |           |
| MOL000098 | quercetin | member 2                           | h001 | validated |
| MOL000098 | quercetin | Hyaluronan synthase 2              | h001 | validated |
|           |           | Nuclear factor erythroid 2-related |      |           |
| MOL000098 | quercetin | factor 2                           | h001 | validated |
| MOL000098 | quercetin | NAD(P)H dehydrogenase [quinone] 1  | 2157 | validated |
| MOL000098 | quercetin | Poly [ADP-ribose] polymerase 1     | h001 | validated |
| MOL000098 | quercetin | Aryl hydrocarbon receptor          | 6220 | validated |
|           |           | 26S proteasome non-ATPase          |      |           |
| MOL000098 | quercetin | regulatory subunit 3               | h001 | validated |

|           |           |                                     |      |           |
|-----------|-----------|-------------------------------------|------|-----------|
|           |           | Solute carrier family 2,            |      |           |
| MOL000098 | quercetin | facilitated glucose transporter     | h001 | validated |
| MOL000098 | quercetin | Collagen alpha-1(III) chain         | 3853 | validated |
| MOL000098 | quercetin | DNA gyrase subunit B                | 4150 | validated |
| MOL000098 | quercetin | C-X-C motif chemokine 11            | h001 | validated |
| MOL000098 | quercetin | C-X-C motif chemokine 2             | h001 | validated |
| MOL000098 | quercetin | DDB1- and CUL4-associated factor 5  | h001 | validated |
|           |           | Nuclear receptor subfamily 1 group  |      |           |
| MOL000098 | quercetin | I member 3                          | h001 | validated |
| MOL000098 | quercetin | Chk2                                | h001 | validated |
| MOL000098 | quercetin | Insulin receptor                    | 36   | validated |
| MOL000098 | quercetin | Claudin-4                           | h001 | validated |
|           |           | Peroxisome proliferator-activated   |      |           |
| MOL000098 | quercetin | receptor alpha                      | h001 | validated |
|           |           | Peroxisome proliferator-activated   |      |           |
| MOL000098 | quercetin | receptor delta                      | h001 | validated |
| MOL000098 | quercetin | Heat shock factor protein 1         | h001 | validated |
| MOL000098 | quercetin | C-reactive protein                  | h001 | validated |
| MOL000098 | quercetin | C-X-C motif chemokine 10            | h001 | validated |
|           |           | Inhibitor of nuclear factor kappa-B |      |           |
| MOL000098 | quercetin | kinase subunit alpha                | h001 | validated |
| MOL000098 | quercetin | Osteopontin                         | h001 | validated |
| MOL000098 | quercetin | Runt-related transcription factor 2 | h001 | validated |
|           |           | Ras association domain-containing   |      |           |
| MOL000098 | quercetin | protein 1                           | h001 | validated |
| MOL000098 | quercetin | Transcription factor E2F1           | h001 | validated |
| MOL000098 | quercetin | Transcription factor E2F2           | h001 | validated |
| MOL000098 | quercetin | Prostatic acid phosphatase          | 1859 | validated |
| MOL000098 | quercetin | Cathepsin D                         | 1243 | validated |
|           |           | Insulin-like growth factor-binding  |      |           |
| MOL000098 | quercetin | protein 3                           | h001 | validated |
| MOL000098 | quercetin | Insulin-like growth factor II       | h001 | validated |
| MOL000098 | quercetin | CD40 ligand                         | h001 | validated |
| MOL000098 | quercetin | Interferon regulatory factor 1      | h001 | validated |
|           |           | Receptor tyrosine-protein kinase    |      |           |
| MOL000098 | quercetin | erbB-3                              | h001 | validated |
| MOL000098 | quercetin | Serum paraoxonase/arylesterase 1    | 1198 | validated |
| MOL000098 | quercetin | Type I iodothyronine deiodinase     | h001 | validated |
| MOL000098 | quercetin | enhancer 1                          | h001 | validated |
| MOL000098 | quercetin | Puromycin-sensitive aminopeptidase  | h001 | validated |
| MOL000098 | quercetin | Hexokinase-2                        | h001 | validated |
| MOL000098 | quercetin | Homeobox protein Nkx-3.1            | h001 | validated |
| MOL000098 | quercetin | Ras GTPase-activating protein 1     | h001 | validated |
| MOL000098 | quercetin | Peroxidase C1A                      | h001 | validated |
| MOL000098 | quercetin | Glutathione S-transferase Mu 1      | 896  | validated |
| MOL000098 | quercetin | Glutathione S-transferase Mu 2      | 2165 | validated |
