# Supplementary material for: The Study of Yin-Chen-Hao-Tang Preventing and Treating Alcoholic Fatty Liver Disease through PPAR Signaling Pathway Based on Network Pharmacology and RNA-Seq Transcriptomics
Source: Evid Based Complement Alternat Med. 2021 Dec 31;2021:8917993. doi: 10.1155/2021/8917993 (PMC8741355; doi:10.1155/2021/8917993)
Supplement: Supplementary Materials — Supplementary Material 1-1: Herb Target-Artemisiae Scopariae Herba. Supplementary Material 1-2: Herb Target-Gardeniae Fructus. Supplementary Material 1-3: Herb Target-Radix Rhei Et Rhizome. Supplementary Material 2: AFLD-GeneCards-SearchResults. Supplementary Material 3: string_interactions.tsv default node. [file 8917993.f1.zip]

Archive with 5 entries (5 files):
- 8917993.f1/Supplementary material 1-1 Herb Target-Artemisiae Scopariae Herba.pdf
- 8917993.f1/Supplementary material 1-2 Herb Target--Gardeniae Fructus.pdf
- 8917993.f1/Supplementary material 1-3 Herb Target-Radix Rhei Et Rhizome.pdf
- 8917993.f1/Supplementary material 2-AFLD-GeneCards-SearchResults.pdf
- 8917993.f1/Supplementary material 3-string_interactions.tsv default node.pdf
